# Supplementary material
Source: PubMed Central journal article supplement (PMC6208316)
Supplement: NIHMS706383-supplement-1.pdf [file NIHMS706383-supplement-1.pdf]

**Table 2S. Gene expression in untreated- and TGF- $\beta$ -treated eosinophils.**

**Table 3S. Top signaling pathways regulating individual TGF- $\beta$  target genes.** Name of pathways (left column) are listed in order from top to the bottom based on the P value (middle column) determined by Ingenuity Canonical Pathway analysis, and the involved genes are shown in the right column.
