# Supplementary material
Source: PubMed Central journal article supplement (PMC6208316)
Supplement: NIHMS706383-supplement-Table_2s.pdf [file NIHMS706383-supplement-Table_2s.pdf]

| Feature ID | Un-treated | TGF-beta |
|------------|------------|----------|
| 3.8-1.2    | 0          | 0        |
| 3.8-1.3    | 0          | 0        |
| 3.8-1.5    | 0          | 0        |
| 5-HT3c2    | 0          | 0        |
| A1BG       | 1.51201417 | 1.325448 |
| A1CF       | 0          | 0        |
| A2BP1      | 0.01164838 | 0.004411 |
| A2LD1      | 0          | 0        |
| A2M        | 0.00903732 | 0.005133 |
| A2ML1      | 0.01215337 | 0.027613 |
| A2MP       | 0          | 0        |
| A3GALT2    | 0.06165786 | 0.046696 |
| A4GALT     | 0.01005035 | 0.045669 |
| A4GNT      | 0.04748804 | 0.026974 |
| AAA1       | 0          | 0        |
| AAAS       | 4.99022553 | 4.732814 |
| AACP       | 0          | 0        |
| AACS       | 5.95116263 | 6.739039 |
| AACSL      | 0          | 0        |
| AADAC      | 0.01309174 | 0        |
| AADACL1    | 0.61276903 | 0.506772 |
| AADACL2    | 0          | 0        |
| AADACL3    | 0.01038544 | 0        |
| AADACL4    | 0          | 0        |
| AADAT      | 0.00874598 | 0        |
| AAK1       | 2.13862172 | 2.066711 |
| AAMP       | 14.9276332 | 12.8151  |
| AANAT      | 0          | 0.023766 |
| AARS       | 4.09314906 | 3.971328 |
| AARS2      | 1.09479452 | 0.819146 |
| AARSD1     | 0.86046728 | 0.566669 |
| AASDH      | 1.66455456 | 1.582506 |
| AASDHPPT   | 6.91535702 | 6.678814 |
| AASS       | 0.02148731 | 0.016273 |
| AATF       | 18.0595907 | 17.25841 |
| AATK       | 0.04749698 | 0.067447 |
| ABAT       | 5.48147752 | 7.483732 |
| ABCA1      | 23.840286  | 25.85336 |
| ABCA10     | 0.08966734 | 0.083    |
| ABCA11P    | 0          | 0        |
| ABCA12     | 0.00905289 | 0        |
| ABCA13     | 0.00489416 | 0.00139  |
| ABCA17P    | 0          | 0        |
| ABCA2      | 0.77964744 | 1.1114   |
| ABCA3      | 0.03492053 | 0.032457 |
| ABCA4      | 0.00286996 | 0.00326  |

|          |            |          |
|----------|------------|----------|
| ABCA5    | 1.81562026 | 1.69844  |
| ABCA6    | 0          | 0.00451  |
| ABCA7    | 32.298041  | 32.17257 |
| ABCA8    | 0          | 0.004175 |
| ABCA9    | 0.00333682 | 0.003791 |
| ABCB1    | 0.08199534 | 0.083343 |
| ABCB10   | 13.2628028 | 14.42272 |
| ABCB10P1 | 0          | 0        |
| ABCB11   | 0.05283853 | 0.040017 |
| ABCB4    | 0.02636075 | 0.011978 |
| ABCB5    | 0          | 0.017159 |
| ABCB6    | 0.7852664  | 0.747414 |
| ABCB7    | 4.23677595 | 3.512222 |
| ABCB8    | 3.2236147  | 4.61585  |
| ABCB9    | 0.04705993 | 0.047521 |
| ABCC1    | 41.4708958 | 41.28587 |
| ABCC10   | 5.69436047 | 5.2812   |
| ABCC11   | 0.01285167 | 0.038933 |
| ABCC12   | 0.00813674 | 0        |
| ABCC13   | 0          | 0        |
| ABCC2    | 0.92826149 | 0.841724 |
| ABCC3    | 0.00398887 | 0.013594 |
| ABCC4    | 3.2755394  | 3.09452  |
| ABCC5    | 7.8837548  | 6.202958 |
| ABCC6    | 0.06783581 | 0.051375 |
| ABCC6P1  | 0          | 0        |
| ABCC6P2  | 0          | 0        |
| ABCC8    | 0.0084473  | 0.004798 |
| ABCC9    | 0.0149063  | 0.028223 |
| ABCD1    | 9.95030674 | 11.10162 |
| ABCD1P2  | 0          | 0        |
| ABCD1P3  | 0          | 0        |
| ABCD1P4  | 0          | 0        |
| ABCD2    | 0.00393659 | 0        |
| ABCD3    | 5.326934   | 5.818732 |
| ABCD4    | 6.85304579 | 5.923991 |
| ABCE1    | 0.31081796 | 0.267668 |
| ABCF1    | 14.0937698 | 14.28004 |
| ABCF2    | 1.72365861 | 1.582748 |
| ABCF3    | 18.6791918 | 18.37816 |
| ABCG1    | 41.1991506 | 54.60779 |
| ABCG2    | 0          | 0        |
| ABCG4    | 0.02670901 | 0.024273 |
| ABCG5    | 0.00767348 | 0.008717 |
| ABCG8    | 0          | 0.008963 |
| ABHD1    | 0.31988747 | 0.297325 |
| ABHD10   | 9.60612701 | 7.028221 |

|         |            |          |
|---------|------------|----------|
| ABHD11  | 2.85846241 | 2.879405 |
| ABHD12  | 10.7551937 | 12.03793 |
| ABHD12B | 3.27356419 | 2.328042 |
| ABHD13  | 7.67729927 | 7.807034 |
| ABHD14A | 0.39595727 | 0.359851 |
| ABHD14B | 1.23882732 | 1.131123 |
| ABHD15  | 16.365829  | 23.10028 |
| ABHD2   | 147.716015 | 113.8341 |
| ABHD3   | 7.67057859 | 8.517171 |
| ABHD4   | 19.366098  | 16.21217 |
| ABHD5   | 7.10925631 | 6.608228 |
| ABHD6   | 1.76602237 | 1.567055 |
| ABHD8   | 6.10639995 | 8.58264  |
| ABI1    | 26.1039687 | 22.96044 |
| ABI1P   | 0          | 0        |
| ABI2    | 0.0973395  | 0.147439 |
| ABI3    | 12.2722534 | 17.87136 |
| ABI3BP  | 0.0047005  | 0.01602  |
| ABL1    | 3.44134211 | 3.328614 |
| ABL2    | 0.38436621 | 0.353475 |
| ABLIM1  | 0.2304354  | 0.247395 |
| ABLIM2  | 0.00870254 | 0.009886 |
| ABLIM3  | 0          | 0.00551  |
| ABO     | 5.35287083 | 6.398608 |
| ABP1    | 1.63665056 | 1.023085 |
| ABR     | 37.1738127 | 46.23153 |
| ABRA    | 0.01526894 | 0        |
| ABT1    | 11.2259417 | 11.70423 |
| ABTB1   | 89.5349535 | 84.67603 |
| ABTB2   | 16.6925621 | 13.28678 |
| ACAA1   | 55.7593164 | 48.01971 |
| ACAA2   | 16.7854762 | 18.63631 |
| ACACA   | 0.5949171  | 0.585584 |
| ACACB   | 15.7110365 | 14.34656 |
| ACAD10  | 1.77304267 | 1.521843 |
| ACAD11  | 0.85733211 | 0.785871 |
| ACAD8   | 26.3007429 | 21.15414 |
| ACAD9   | 4.04992783 | 4.322509 |
| ACADL   | 0          | 0        |
| ACADM   | 8.13676288 | 9.042546 |
| ACADS   | 2.20453392 | 1.507615 |
| ACADSB  | 2.45962044 | 2.054417 |
| ACADVL  | 128.945561 | 128.2572 |
| ACAN    | 0.00247502 | 0.008435 |
| ACAP1   | 123.745977 | 146.7772 |
| ACAP2   | 20.9460566 | 21.10001 |
| ACAP3   | 13.5023009 | 14.55727 |

|        |            |          |
|--------|------------|----------|
| ACAT1  | 1.02274762 | 0.960767 |
| ACAT2  | 4.69037041 | 3.110762 |
| ACBD3  | 11.9723483 | 12.1268  |
| ACBD4  | 1.44186776 | 1.377987 |
| ACBD5  | 5.85875553 | 5.874351 |
| ACBD6  | 2.87610659 | 2.320912 |
| ACBD7  | 0.02495588 | 0.042525 |
| ACCN1  | 0.00984332 | 0.011182 |
| ACCN2  | 0.00536908 | 0.006099 |
| ACCN3  | 1.57085806 | 2.413677 |
| ACCN4  | 0.00767068 | 0.008714 |
| ACCN5  | 0          | 0        |
| ACCS   | 37.0180029 | 27.13543 |
| ACCSL  | 0          | 0        |
| ACD    | 3.66365883 | 3.375824 |
| ACE    | 0.00472904 | 0        |
| ACE2   | 0.00599525 | 0.006811 |
| ACER1  | 0.01932475 | 0        |
| ACER2  | 0.09583776 | 0.075374 |
| ACER3  | 9.04371997 | 10.21392 |
| ACHE   | 0.05688287 | 0.024232 |
| ACIN1  | 67.4615925 | 62.31992 |
| ACLY   | 24.0876006 | 22.51884 |
| ACMSD  | 0.15114056 | 0.038155 |
| ACN9   | 0.13287764 | 0.174174 |
| ACO1   | 0.78178695 | 0.814112 |
| ACO2   | 13.6844912 | 12.9316  |
| ACOT1  | 0.02623248 | 0        |
| ACOT11 | 4.77732307 | 4.759609 |
| ACOT12 | 0          | 0.012009 |
| ACOT13 | 1.79241658 | 1.551401 |
| ACOT2  | 0.28557326 | 0.486624 |
| ACOT4  | 0.11594852 | 0.146355 |
| ACOT6  | 0          | 0        |
| ACOT7  | 3.11551576 | 6.798608 |
| ACOT8  | 13.2657663 | 11.6845  |
| ACOT9  | 67.9214368 | 46.27654 |
| ACOX1  | 3.94207834 | 3.899419 |
| ACOX2  | 0          | 0.010403 |
| ACOX3  | 1.43387782 | 1.263235 |
| ACOXL  | 0.00633102 | 0.007192 |
| ACP1   | 10.1497747 | 8.968015 |
| ACP2   | 2.67363638 | 2.076517 |
| ACP5   | 220.220013 | 339.3797 |
| ACP6   | 4.33763742 | 2.655369 |
| ACPL2  | 0.78654963 | 0.675781 |
| ACPP   | 3.94844481 | 3.102937 |

|          |            |          |
|----------|------------|----------|
| ACPT     | 0.03121801 | 0.017732 |
| ACR      | 0          | 0        |
| ACRBP    | 1.25973616 | 1.380423 |
| ACRC     | 1.47534575 | 1.097302 |
| ACRV1    | 0          | 0        |
| ACSBG1   | 0.00742945 | 0.00844  |
| ACSBG2   | 0.0077527  | 0.026422 |
| ACSF2    | 19.8702994 | 20.10872 |
| ACSF3    | 1.76128427 | 1.809977 |
| ACSL1    | 11.4990049 | 14.9588  |
| ACSL3    | 8.0851823  | 8.040207 |
| ACSL4    | 117.966491 | 116.4662 |
| ACSL5    | 4.82953649 | 3.470486 |
| ACSL6    | 0.12110591 | 0.107005 |
| ACSM1    | 2.22452307 | 2.806588 |
| ACSM2A   | 0          | 0.008058 |
| ACSM2B   | 0          | 0        |
| ACSM3    | 19.7037912 | 24.02064 |
| ACSM4    | 0.01206273 | 0.054814 |
| ACSM5    | 0          | 0        |
| ACSS1    | 10.4962137 | 9.857347 |
| ACSS2    | 6.55563196 | 5.750545 |
| ACSS3    | 0.02079657 | 0.023625 |
| ACTA1    | 0.02816521 | 0.063992 |
| ACTA2    | 0.52250958 | 0.490348 |
| ACTB     | 4348.53043 | 4463.668 |
| ACTBL2   | 0.01505034 | 0.008549 |
| ACTBL3   | 0.48029225 | 0.276882 |
| ACTBP11  | 0          | 0        |
| ACTBP2   | 0          | 0        |
| ACTBP4   | 0          | 0        |
| ACTBP6   | 0          | 0        |
| ACTBP7   | 0          | 0        |
| ACTBP8   | 0          | 0        |
| ACTBP9   | 0          | 0        |
| ACTC1    | 0.00569329 | 0.025871 |
| ACTG1    | 736.423447 | 813.9732 |
| ACTG1P11 | 0          | 0        |
| ACTG1P2  | 0          | 0        |
| ACTG2    | 0.3001362  | 0.197398 |
| ACTGP1   | 0          | 0        |
| ACTGP10  | 0          | 0        |
| ACTGP3   | 0          | 0        |
| ACTGP9   | 0          | 0        |
| ACTL6A   | 4.42348254 | 4.122876 |
| ACTL6B   | 0.02735892 | 0.01554  |
| ACTL7A   | 0          | 0.016668 |

|          |            |          |
|----------|------------|----------|
| ACTL7B   | 0.04479829 | 0        |
| ACTL8    | 0.01257496 | 0.014285 |
| ACTN1    | 177.974907 | 183.9109 |
| ACTN2    | 0.0046434  | 0.0211   |
| ACTN3    | 0.00735923 | 0        |
| ACTN4    | 101.832164 | 107.3449 |
| ACTR10   | 10.1682702 | 10.24067 |
| ACTR1A   | 36.9132507 | 36.38052 |
| ACTR1B   | 19.9638218 | 19.97125 |
| ACTR2    | 165.62659  | 160.1225 |
| ACTR3    | 151.534336 | 156.0547 |
| ACTR3B   | 1.24297091 | 1.075319 |
| ACTR3BP1 | 0          | 0        |
| ACTR5    | 3.08722084 | 3.256622 |
| ACTR6    | 6.61309555 | 6.137997 |
| ACTR8    | 8.95291398 | 8.307275 |
| ACTRT1   | 0          | 0        |
| ACTRT2   | 0          | 0        |
| ACVR1    | 9.85055673 | 13.43921 |
| ACVR1B   | 32.4936933 | 33.3713  |
| ACVR1C   | 0.03937762 | 0.015788 |
| ACVR2A   | 0.28466791 | 0.177635 |
| ACVR2B   | 0.18487058 | 0.159612 |
| ACVRL1   | 0.00477414 | 0.010847 |
| ACY1     | 0.20802448 | 0.168799 |
| ACY3     | 0.03234666 | 0.036746 |
| ACYP1    | 1.21885977 | 0.830786 |
| ACYP2    | 0.41226139 | 0.370766 |
| ADA      | 0.23330981 | 0.077954 |
| ADAD1    | 0          | 0        |
| ADAD2    | 0.01825116 | 0        |
| ADAL     | 1.10588655 | 0.934568 |
| ADAM1    | 0          | 0        |
| ADAM10   | 16.7153255 | 16.66544 |
| ADAM11   | 0.396434   | 0.303854 |
| ADAM12   | 0.00602014 | 0        |
| ADAM15   | 3.43690108 | 3.46161  |
| ADAM17   | 13.302701  | 14.2428  |
| ADAM18   | 0          | 0        |
| ADAM19   | 20.0952519 | 10.60433 |
| ADAM2    | 0.0079551  | 0        |
| ADAM20   | 0.01506113 | 0.034219 |
| ADAM21   | 0          | 0        |
| ADAM21P  | 0          | 0        |
| ADAM22   | 0.01740508 | 0.039545 |
| ADAM23   | 0.01376003 | 0.007816 |
| ADAM28   | 19.8591625 | 18.69636 |

|          |            |          |
|----------|------------|----------|
| ADAM29   | 0.01264682 | 0        |
| ADAM30   | 0          | 0        |
| ADAM32   | 0.01542012 | 0.026276 |
| ADAM33   | 0.0059748  | 0.006787 |
| ADAM3A   | 0          | 0        |
| ADAM3B   | 0          | 0        |
| ADAM5P   | 0          | 0        |
| ADAM6    | 0          | 0        |
| ADAM7    | 0          | 0        |
| ADAM8    | 926.679388 | 952.3684 |
| ADAM9    | 11.8539985 | 15.63982 |
| ADAMDEC1 | 0.25009623 | 0.19594  |
| ADAMTS1  | 0.01808242 | 0.020542 |
| ADAMTS10 | 0.03473621 | 0.067647 |
| ADAMTS12 | 0.01272977 | 0.00482  |
| ADAMTS13 | 0.00852263 | 0.033886 |
| ADAMTS14 | 0.22346148 | 0.630106 |
| ADAMTS15 | 0          | 0.008372 |
| ADAMTS16 | 0.00422705 | 0.009604 |
| ADAMTS17 | 0.03985215 | 0.033955 |
| ADAMTS18 | 0.00711156 | 0.008079 |
| ADAMTS19 | 0.00413153 | 0.004693 |
| ADAMTS2  | 0.09028591 | 0.089745 |
| ADAMTS20 | 0          | 0.004166 |
| ADAMTS3  | 0          | 0.004103 |
| ADAMTS4  | 0.01941397 | 0.011027 |
| ADAMTS5  | 0.00217586 | 0.002472 |
| ADAMTS6  | 0.00578573 | 0.003286 |
| ADAMTS7  | 3.12890627 | 3.054162 |
| ADAMTS8  | 0.03443953 | 0.013041 |
| ADAMTS9  | 0.00862519 | 0        |
| ADAMTSL1 | 0.00263641 | 0.002995 |
| ADAMTSL2 | 0.00508718 | 0        |
| ADAMTSL3 | 0.00286605 | 0.006512 |
| ADAMTSL4 | 1.36420171 | 1.449771 |
| ADAMTSL5 | 0.00783942 | 0.008906 |
| ADAP1    | 60.7851192 | 69.82434 |
| ADAP2    | 0.16826383 | 0.147707 |
| ADAR     | 87.6809668 | 87.60592 |
| ADARB1   | 65.4239544 | 67.6728  |
| ADARB2   | 0          | 0.013073 |
| ADAT1    | 4.12488158 | 3.582328 |
| ADAT2    | 0.09078585 | 0.152791 |
| ADAT3    | 0          | 0        |
| ADC      | 0.2794384  | 0.284607 |
| ADCK1    | 1.20467429 | 1.04778  |
| ADCK2    | 1.88552037 | 1.586278 |

|           |            |          |
|-----------|------------|----------|
| ADCK4     | 6.30589269 | 4.817735 |
| ADCK5     | 1.94738434 | 2.02993  |
| ADCY1     | 0.00168216 | 0.003822 |
| ADCY10    | 0.00807424 | 0.004586 |
| ADCY2     | 0.0032085  | 0.00729  |
| ADCY3     | 0.14823408 | 0.135803 |
| ADCY4     | 8.98622134 | 8.895244 |
| ADCY5     | 0          | 0        |
| ADCY6     | 0.00941714 | 0.003566 |
| ADCY7     | 20.0696341 | 28.82323 |
| ADCY8     | 0.00512688 | 0        |
| ADCY9     | 0.17691217 | 0.182423 |
| ADCYAP1   | 0.01283206 | 0        |
| ADCYAP1R1 | 0          | 0        |
| ADD1      | 63.4532911 | 59.9535  |
| ADD2      | 0          | 0        |
| ADD3      | 90.7205778 | 75.68607 |
| ADFP      | 69.9357726 | 49.27812 |
| ADH1A     | 0.01444047 | 0.032809 |
| ADH1B     | 0          | 0        |
| ADH1C     | 0          | 0        |
| ADH4      | 0          | 0        |
| ADH5      | 11.8804253 | 10.04548 |
| ADH5P2    | 0          | 0        |
| ADH5P3    | 0          | 0        |
| ADH5P4    | 0          | 0        |
| ADH6      | 0.02098336 | 0.023837 |
| ADH7      | 0          | 0        |
| ADHFE1    | 2.75160004 | 2.684712 |
| ADI1      | 26.457293  | 22.61675 |
| ADIG      | 0.02730562 | 0        |
| ADIPOQ    | 0.00459269 | 0.005217 |
| ADIPOR1   | 71.957619  | 72.24701 |
| ADIPOR2   | 145.06683  | 172.027  |
| ADK       | 0.94751379 | 0.74271  |
| ADM       | 0.37726612 | 0.609903 |
| ADM2      | 0.03466258 | 0.033752 |
| ADNP      | 21.0877869 | 20.15005 |
| ADNP2     | 3.76567268 | 3.147444 |
| ADO       | 3.02620231 | 3.931679 |
| ADORA1    | 0.00720292 | 0.008183 |
| ADORA2A   | 2.57285811 | 2.02921  |
| ADORA2B   | 14.6340765 | 7.577345 |
| ADORA2BP  | 0          | 0        |
| ADORA3    | 159.398907 | 182.6146 |
| ADPGK     | 74.6937412 | 76.51822 |
| ADPRH     | 4.53643372 | 4.299181 |



|          |            |          |
|----------|------------|----------|
| ADPRHL1  | 0.07740573 | 0.131901 |
| ADPRHL2  | 8.33055692 | 7.133046 |
| ADPRTL4  | 0          | 0        |
| ADRA1A   | 0          | 0.006709 |
| ADRA1B   | 0.00932801 | 0.03179  |
| ADRA1D   | 0.00788647 | 0.008959 |
| ADRA2A   | 0.00542449 | 0.012325 |
| ADRA2B   | 0          | 0.036566 |
| ADRA2C   | 0          | 0.012199 |
| ADRB1    | 0.05877102 | 0.033382 |
| ADRB2    | 4.96417062 | 0.986891 |
| ADRB3    | 0.00794308 | 0        |
| ADRBK1   | 419.993806 | 496.6078 |
| ADRBK2   | 13.0642157 | 10.14115 |
| ADRM1    | 37.4565149 | 43.0782  |
| ADSL     | 6.28744721 | 6.730564 |
| ADSS     | 38.7485334 | 35.65006 |
| ADSSL1   | 0.08094449 | 0.045977 |
| ADTB1L1  | 0          | 0        |
| ADTB1L2  | 0          | 0        |
| AEBP1    | 1.37558524 | 1.685595 |
| AEBP2    | 2.34399008 | 2.434931 |
| AEN      | 0.19567863 | 0.153306 |
| AES      | 195.309418 | 209.8153 |
| AF357530 | 0          | 0        |
| AF357532 | 0          | 0        |
| AF357533 | 0          | 0        |
| AF357534 | 0          | 0        |
| AFAP1    | 5.11697566 | 4.770874 |
| AFAP1L1  | 0.00506269 | 0.017254 |
| AFAP1L2  | 0          | 0.012015 |
| AFARP1   | 0          | 0        |
| AFF1     | 15.1647834 | 11.43572 |
| AFF2     | 0.81219633 | 0.813199 |
| AFF3     | 0.02048005 | 0.029082 |
| AFF4     | 14.5070394 | 13.86733 |
| AFG3L1   | 0          | 0        |
| AFG3L2   | 8.48676876 | 8.746319 |
| AFM      | 0          | 0        |
| AFMID    | 0.22183819 | 0.056003 |
| AFP      | 0          | 0        |
| AFTPH    | 31.0249332 | 31.19985 |
| AGA      | 4.92410985 | 4.610844 |
| AGAP1    | 0.03248947 | 0.010545 |
| AGAP10   | 0.3768163  | 0.300805 |
| AGAP11   | 0.13994674 | 0.166552 |
| AGAP2    | 12.2423917 | 14.00002 |

|          |            |          |
|----------|------------|----------|
| AGAP3    | 6.37961079 | 8.848897 |
| AGAP4    | 0.74380027 | 0.638639 |
| AGAP5    | 1.39533318 | 1.15192  |
| AGAP6    | 2.45750622 | 2.162757 |
| AGAP7    | 1.53780313 | 1.401523 |
| AGAP8    | 0.03475261 | 0.02961  |
| AGAP9    | 0.26478983 | 0.277667 |
| AGBL1    | 0          | 0        |
| AGBL2    | 0.19221034 | 0.084524 |
| AGBL3    | 0.07141352 | 0.087887 |
| AGBL4    | 0.00703659 | 0.015987 |
| AGBL5    | 4.28871804 | 3.680633 |
| AGER     | 29.9341224 | 26.45251 |
| AGFG1    | 6.08045449 | 5.956243 |
| AGFG2    | 6.71272259 | 9.279    |
| AGGF1    | 11.7508343 | 10.93709 |
| AGK      | 1.94798793 | 2.433423 |
| AGKP1    | 0          | 0        |
| AGL      | 4.22451277 | 3.386413 |
| AGMAT    | 0.00957438 | 0.043507 |
| AGPAT1   | 16.0227838 | 18.20214 |
| AGPAT2   | 39.4157044 | 61.62605 |
| AGPAT3   | 18.2321337 | 24.06581 |
| AGPAT4   | 0.06404467 | 0.066693 |
| AGPAT5   | 1.3174148  | 0.830486 |
| AGPAT5P1 | 0          | 0        |
| AGPAT6   | 7.71039871 | 6.408477 |
| AGPAT9   | 1.76732261 | 1.970003 |
| AGPS     | 5.35439609 | 5.278718 |
| AGR2     | 0          | 0        |
| AGR3     | 0          | 0        |
| AGRN     | 2.50499913 | 2.718445 |
| AGRP     | 0.05504013 | 0.031263 |
| AGT      | 0          | 0        |
| AGTPBP1  | 28.4144097 | 25.31205 |
| AGTR1    | 0          | 0        |
| AGTR2    | 0          | 0        |
| AGTRAP   | 16.7217085 | 15.22676 |
| AGXT     | 0          | 0        |
| AGXT2    | 0          | 0        |
| AGXT2L1  | 0          | 0        |
| AGXT2L2  | 19.4168357 | 16.82518 |
| AHCTF1   | 6.8290354  | 6.15078  |
| AHCTF1P  | 0          | 0        |
| AHCY     | 0.81709817 | 0.769757 |
| AHCYL1   | 25.8242504 | 24.96594 |
| AHCYL2   | 2.13829962 | 1.952926 |

|         |            |          |
|---------|------------|----------|
| AHDC1   | 0.80269121 | 0.992762 |
| AHI1    | 0.56324217 | 0.461665 |
| AHNAK   | 6.57948892 | 6.228256 |
| AHNAK2  | 0.1618481  | 0.174734 |
| AHR     | 3.3451034  | 1.384465 |
| AHRR    | 0.27112686 | 0.232058 |
| AHSA1   | 16.850301  | 14.85995 |
| AHSA2   | 32.7137227 | 30.08831 |
| AHSG    | 0          | 0        |
| AICDA   | 0          | 0.017097 |
| AIDA    | 3.02160445 | 3.194216 |
| AIF1    | 2.01854015 | 1.769837 |
| AIF1L   | 0.01241165 | 0.00705  |
| AIFM1   | 6.25965024 | 5.909718 |
| AIFM2   | 0.32446498 | 0.235902 |
| AIFM3   | 0.5997008  | 0.477906 |
| AIG1    | 0.78939871 | 0.62084  |
| AIM1    | 1.06894308 | 0.803233 |
| AIM1L   | 0.30790234 | 0.149907 |
| AIM2    | 0.02833603 | 0.03219  |
| AIP     | 25.2883745 | 22.27727 |
| AIPL1   | 0          | 0        |
| AIRE    | 0.00708162 | 0.008045 |
| AJAP1   | 5.07726563 | 3.17556  |
| AK1     | 0.64022411 | 1.191093 |
| AK2     | 54.7942846 | 48.56202 |
| AK2P1   | 0          | 0        |
| AK2P2   | 0          | 0        |
| AK3     | 10.0192626 | 10.20677 |
| AK3L1   | 0          | 0.028222 |
| AK3L2   | 0          | 0        |
| AK3P1   | 0          | 0        |
| AK5     | 0          | 0        |
| AK7     | 0          | 0        |
| AKAP1   | 2.31554174 | 2.86525  |
| AKAP10  | 14.7472839 | 12.51983 |
| AKAP11  | 4.07406857 | 3.722793 |
| AKAP12  | 0.06219804 | 0.06794  |
| AKAP13  | 71.7208543 | 66.162   |
| AKAP14  | 0.02300364 | 0        |
| AKAP17A | 61.0520592 | 63.4332  |
| AKAP2   | 1.21439412 | 1.441343 |
| AKAP3   | 0.01392406 | 0.015818 |
| AKAP4   | 0          | 0        |
| AKAP5   | 0.05185838 | 0.058912 |
| AKAP6   | 0.0020242  | 0.0023   |
| AKAP7   | 0.14147131 | 0.153061 |

|          |            |          |
|----------|------------|----------|
| AKAP8    | 15.5440885 | 14.70738 |
| AKAP8L   | 45.8300497 | 45.51051 |
| AKAP9    | 9.78471633 | 8.457433 |
| AKD2     | 0.52630803 | 0.648996 |
| AKIRIN1  | 39.5671122 | 41.43532 |
| AKIRIN2  | 25.6504685 | 24.05819 |
| AKNA     | 55.741178  | 52.95659 |
| AKR1A1   | 3.424321   | 2.925342 |
| AKR1B1   | 0.48126652 | 0.341704 |
| AKR1B10  | 0          | 0        |
| AKR1B10L | 0          | 0        |
| AKR1B1P1 | 0          | 0        |
| AKR1B1P2 | 0          | 0        |
| AKR1B1P3 | 0          | 0        |
| AKR1B1P4 | 0          | 0        |
| AKR1B1P5 | 0          | 0        |
| AKR1B1P7 | 0          | 0        |
| AKR1B1P8 | 0          | 0        |
| AKR1C1   | 3.47626937 | 3.221632 |
| AKR1C2   | 0.48926871 | 0.495729 |
| AKR1C3   | 2.93736241 | 3.161264 |
| AKR1C4   | 0.10565493 | 0.080017 |
| AKR1CL1  | 0.04273441 | 0        |
| AKR1CL2  | 0.48319084 | 0.593419 |
| AKR1D1   | 0          | 0        |
| AKR1D1P  | 0          | 0        |
| AKR7A2   | 1.97594887 | 1.47309  |
| AKR7A3   | 0.23719149 | 0.11548  |
| AKR7L    | 0.00908614 | 0.072254 |
| AKT1     | 174.803398 | 189.6841 |
| AKT1S1   | 5.06468439 | 4.217322 |
| AKT2     | 21.2730168 | 19.21519 |
| AKT3     | 0.48528383 | 0.520319 |
| AKTIP    | 2.09117828 | 1.70915  |
| ALAD     | 14.8029427 | 16.72633 |
| ALAS1    | 15.240127  | 7.474519 |
| ALAS2    | 0.00985254 | 0.033578 |
| ALB      | 0          | 0        |
| ALCAM    | 7.6056618  | 6.846628 |
| ALDH16A1 | 19.4684005 | 20.85525 |
| ALDH18A1 | 0.20642831 | 0.227609 |
| ALDH1A1  | 0.01003117 | 0.022791 |
| ALDH1A2  | 0.17818077 | 0.118658 |
| ALDH1A3  | 0.10223988 | 0.266453 |
| ALDH1B1  | 0.05560418 | 0        |
| ALDH1L1  | 0.01345621 | 0        |
| ALDH1L2  | 0.00752517 | 0        |

|           |            |          |
|-----------|------------|----------|
| ALDH2     | 11.6252559 | 11.56437 |
| ALDH3A1   | 0          | 0        |
| ALDH3A2   | 5.70820979 | 5.354958 |
| ALDH3B1   | 24.326644  | 20.21961 |
| ALDH3B2   | 0.44568385 | 0.346418 |
| ALDH4A1   | 0.3260257  | 0.241875 |
| ALDH5A1   | 0.0040668  | 0.00462  |
| ALDH6A1   | 3.36135616 | 1.181673 |
| ALDH7A1   | 0.00592096 | 0.006726 |
| ALDH7A1P1 | 0          | 0        |
| ALDH8A1   | 0.04135588 | 0.028189 |
| ALDH9A1   | 17.6360476 | 17.03486 |
| ALDOA     | 181.570745 | 199.1883 |
| ALDOAP1   | 0          | 0        |
| ALDOAP2   | 0          | 0        |
| ALDOB     | 0.01733333 | 0.009845 |
| ALDOC     | 0.98058782 | 0.853556 |
| ALG1      | 1.53922098 | 1.092862 |
| ALG10     | 1.10235111 | 0.93158  |
| ALG10B    | 1.09572154 | 1.03137  |
| ALG11     | 2.8829059  | 2.672723 |
| ALG12     | 5.3293681  | 5.108899 |
| ALG13     | 4.51561366 | 4.175844 |
| ALG14     | 0.09945757 | 0.090388 |
| ALG1L     | 0.13059212 | 0.178026 |
| ALG2      | 10.72069   | 15.2257  |
| ALG3      | 2.22526689 | 1.993683 |
| ALG5      | 2.59785803 | 2.380641 |
| ALG6      | 2.08943514 | 2.111469 |
| ALG8      | 0.28950542 | 0.232959 |
| ALG9      | 0.99054072 | 0.913834 |
| ALK       | 0.01014083 | 0        |
| ALKBH1    | 3.09889791 | 2.910565 |
| ALKBH2    | 0.22834528 | 0.23945  |
| ALKBH3    | 1.67505823 | 1.55276  |
| ALKBH4    | 6.64278572 | 6.438595 |
| ALKBH5    | 32.6829402 | 32.5725  |
| ALKBH6    | 15.0857288 | 14.52176 |
| ALKBH7    | 1.78052352 | 1.656895 |
| ALKBH8    | 0.35154229 | 0.299518 |
| ALLC      | 0          | 0        |
| ALMS1     | 1.49855516 | 1.362276 |
| ALMS1P    | 0          | 0        |
| ALOX12    | 3.32588993 | 3.059077 |
| ALOX12B   | 0          | 0.019093 |
| ALOX12P1  | 0          | 0        |
| ALOX12P2  | 0          | 0        |

|               |            |          |
|---------------|------------|----------|
| ALOX15        | 412.383196 | 374.0458 |
| ALOX15B       | 0.01548257 | 0.026383 |
| ALOX15P       | 0          | 0        |
| ALOX5         | 160.242    | 176.1457 |
| ALOX5AP       | 961.529568 | 1185.993 |
| ALOXE3        | 0          | 0.007388 |
| ALPI          | 0          | 0        |
| ALPK1         | 0.30634473 | 0.242287 |
| ALPK2         | 0.02878999 | 0.009812 |
| ALPK3         | 0.07125925 | 0.067824 |
| ALPL          | 0.8143341  | 0.907476 |
| ALPP          | 0.00733357 | 0        |
| ALPPL2        | 0          | 0        |
| ALS2          | 3.76550521 | 2.616997 |
| ALS2CL        | 0.00424668 | 0.009649 |
| ALS2CR11      | 0.0099788  | 0        |
| ALS2CR12      | 0.24022981 | 0.213578 |
| ALS2CR4       | 0.02686698 | 0.017441 |
| ALS2CR8       | 0.57829298 | 0.513615 |
| ALX1          | 0.01624832 | 0        |
| ALX3          | 2.04847609 | 2.197818 |
| ALX4          | 0.02651366 | 0.01506  |
| AMAC1         | 0.03429907 | 0        |
| AMAC1L1       | 0.01750652 | 0        |
| AMAC1L2       | 0.01750652 | 0.059663 |
| AMAC1L3       | 0          | 0        |
| AMACR         | 0.48124278 | 0.263924 |
| AMBN          | 0          | 0        |
| AMBP          | 0          | 0        |
| AMBRA1        | 6.96100446 | 6.985313 |
| AMD1          | 22.580259  | 21.51824 |
| AMDHD1        | 0.1476498  | 0.145368 |
| AMDHD2        | 27.6190738 | 27.02582 |
| AMDP1 (NC_000 | 0          | 0        |
| AMDP1 (NC_000 | 0          | 0        |
| AMELX         | 0          | 0        |
| AMELY         | 0          | 0        |
| AMFR          | 22.5814629 | 22.25024 |
| AMH           | 0.27089128 | 0.319573 |
| AMHR2         | 0.03400323 | 0.012876 |
| AMICA1        | 279.605521 | 138.9832 |
| AMIGO1        | 0.05956184 | 0.048331 |
| AMIGO2        | 0.03725065 | 0.048363 |
| AMIGO3        | 0          | 0        |
| AMMECR1       | 1.63793422 | 1.450656 |
| AMMECR1L      | 7.21049431 | 6.654737 |
| AMN           | 0.01350374 | 0.061362 |

|          |            |          |
|----------|------------|----------|
| AMN1     | 1.56444406 | 1.437635 |
| AMOT     | 0.02846646 | 0.025871 |
| AMOTL1   | 0.00934563 | 0.002654 |
| AMOTL2   | 0.00843713 | 0        |
| AMPD1    | 0          | 0.010203 |
| AMPD2    | 156.30837  | 147.4891 |
| AMPD3    | 50.346924  | 62.43854 |
| AMPH     | 0.10284479 | 0.131437 |
| AMT      | 6.19862349 | 6.00819  |
| AMTN     | 0          | 0        |
| AMY1A    | 0          | 0.011807 |
| AMY1B    | 0          | 0        |
| AMY1C    | 0          | 0.012841 |
| AMY2A    | 0          | 0        |
| AMY2B    | 8.19419134 | 7.731723 |
| AMYP1    | 0          | 0        |
| AMZ1     | 0.3571687  | 0.443619 |
| AMZ2     | 9.33397268 | 8.275346 |
| ANAPC1   | 1.72546284 | 1.729324 |
| ANAPC10  | 2.67946238 | 2.111542 |
| ANAPC10P | 0          | 0        |
| ANAPC11  | 9.24309469 | 9.075638 |
| ANAPC13  | 10.3386147 | 7.790342 |
| ANAPC2   | 13.6508908 | 13.95952 |
| ANAPC4   | 13.8096766 | 13.48007 |
| ANAPC5   | 19.2860466 | 17.87012 |
| ANAPC7   | 6.76803326 | 5.676319 |
| ANG      | 0.01588016 | 0.01804  |
| ANGEL1   | 0.92570783 | 0.795977 |
| ANGEL2   | 11.1887866 | 9.926012 |
| ANGPT1   | 0.00484678 | 0.005506 |
| ANGPT2   | 0.00398963 | 0        |
| ANGPT4   | 0.31723965 | 0.111845 |
| ANGPTL1  | 0          | 0        |
| ANGPTL2  | 0          | 0        |
| ANGPTL3  | 0          | 0        |
| ANGPTL4  | 0.09943667 | 0.062756 |
| ANGPTL5  | 0          | 0        |
| ANGPTL6  | 0.27173287 | 0.655972 |
| ANGPTL7  | 0          | 0        |
| ANK1     | 0.00679625 | 0.005147 |
| ANK2     | 0.00289585 | 0.001645 |
| ANK3     | 0.03478136 | 0.028874 |
| ANKAR    | 0.64984596 | 0.674294 |
| ANKDD1A  | 1.10766279 | 1.319704 |
| ANKDD1B  | 0.01074365 | 0.012205 |
| ANKFN1   | 0.00866667 | 0        |

|                |            |          |
|----------------|------------|----------|
| ANKFY1         | 7.86341425 | 6.754673 |
| ANKH           | 3.11268151 | 3.058761 |
| ANKHD1         | 13.4282778 | 13.02206 |
| ANKHD1-EIF4EBF | 16.8096497 | 15.92341 |
| ANKIB1         | 5.38685506 | 4.972628 |
| ANKK1          | 0.01653585 | 0.009392 |
| ANKLE1         | 1.26138914 | 0.97263  |
| ANKLE2         | 33.7075012 | 44.58232 |
| ANKMY1         | 6.32921123 | 7.863497 |
| ANKMY2         | 7.18225306 | 7.4426   |
| ANKRA2         | 12.530974  | 10.99158 |
| ANKRD1         | 0          | 0        |
| ANKRD10        | 17.4607157 | 17.02113 |
| ANKRD11        | 33.9130634 | 38.39999 |
| ANKRD12        | 15.0820003 | 15.84022 |
| ANKRD13A       | 115.11772  | 99.56609 |
| ANKRD13B       | 0.04638428 | 0.015055 |
| ANKRD13C       | 3.16845467 | 3.190582 |
| ANKRD13D       | 127.573256 | 141.9329 |
| ANKRD16        | 0.10361232 | 0.181085 |
| ANKRD17        | 11.7741853 | 11.68396 |
| ANKRD18A       | 2.2178828  | 2.114622 |
| ANKRD18B       | 0.00614776 | 0.048888 |
| ANKRD19        | 0          | 0        |
| ANKRD2         | 0.01449023 | 0.065845 |
| ANKRD20A1      | 0.04790733 | 0.102044 |
| ANKRD20A2      | 0.02994208 | 0.027212 |
| ANKRD20A3      | 0.03182442 | 0.018077 |
| ANKRD20A4      | 0.32880102 | 0.115453 |
| ANKRD20A6P     | 0          | 0        |
| ANKRD20B       | 0          | 0        |
| ANKRD22        | 0.06857233 | 0.083892 |
| ANKRD23        | 0.95273576 | 0.943564 |
| ANKRD24        | 0.13055968 | 0.166116 |
| ANKRD26        | 0.13336616 | 0.119796 |
| ANKRD26L1      | 0          | 0        |
| ANKRD27        | 8.34780713 | 6.860331 |
| ANKRD28        | 6.91225583 | 8.511826 |
| ANKRD29        | 0.00924597 | 0.021007 |
| ANKRD30A       | 0          | 0        |
| ANKRD30B       | 0          | 0        |
| ANKRD31        | 0.00353902 | 0.008041 |
| ANKRD32        | 0.89880119 | 0.8206   |
| ANKRD33        | 0          | 0.012045 |
| ANKRD33B       | 8.25438919 | 11.66108 |
| ANKRD34A       | 0.32015316 | 0.204994 |
| ANKRD34B       | 0.06202163 | 0.076863 |



|           |            |          |
|-----------|------------|----------|
| ANKRD34C  | 0.00951372 | 0        |
| ANKRD35   | 0.01250391 | 0        |
| ANKRD36   | 1.80274226 | 1.412218 |
| ANKRD36B  | 0.57088886 | 0.504875 |
| ANKRD37   | 2.49872777 | 1.636667 |
| ANKRD39   | 2.12589457 | 2.547745 |
| ANKRD40   | 2.98056383 | 2.698462 |
| ANKRD42   | 1.1571318  | 1.31452  |
| ANKRD43   | 0.01824588 | 0.020728 |
| ANKRD44   | 27.1002028 | 21.32553 |
| ANKRD45   | 0          | 0.017885 |
| ANKRD46   | 2.20921074 | 2.269042 |
| ANKRD49   | 17.2065569 | 16.18671 |
| ANKRD5    | 0.14299205 | 0.156193 |
| ANKRD50   | 1.12669557 | 1.289174 |
| ANKRD52   | 5.90730186 | 5.350419 |
| ANKRD53   | 0.05950565 | 0.101399 |
| ANKRD54   | 2.65766751 | 2.564531 |
| ANKRD55   | 3.39524827 | 1.825613 |
| ANKRD56   | 0          | 0.016354 |
| ANKRD57   | 0.00451769 | 0.020529 |
| ANKRD57P1 | 0          | 0        |
| ANKRD58   | 1.17861069 | 1.231191 |
| ANKRD6    | 13.3160429 | 17.04633 |
| ANKRD60   | 0          | 0        |
| ANKRD62   | 0.01526894 | 0.008673 |
| ANKRD7    | 0          | 0        |
| ANKRD9    | 1.71978414 | 1.865565 |
| ANKS1A    | 5.42599865 | 4.798835 |
| ANKS1B    | 0          | 0.018556 |
| ANKS3     | 0.53708584 | 0.601165 |
| ANKS4B    | 0.01447029 | 0.032877 |
| ANKS6     | 0.31771873 | 0.267358 |
| ANKZF1    | 20.5708585 | 17.75306 |
| ANLN      | 0.15427392 | 0.145213 |
| ANO1      | 0.0087478  | 0.009938 |
| ANO10     | 0.22301924 | 0.270826 |
| ANO2      | 0.00565653 | 0        |
| ANO3      | 0.003542   | 0        |
| ANO4      | 0.00510324 | 0        |
| ANO5      | 0.00315648 | 0.003586 |
| ANO6      | 2.57997714 | 2.476101 |
| ANO7      | 0.07563069 | 0.144986 |
| ANO8      | 0.32931241 | 0.207196 |
| ANO9      | 0.24864739 | 0.340622 |
| ANP32A    | 101.496014 | 127.1032 |
| ANP32B    | 48.5129931 | 51.72891 |

|         |            |          |
|---------|------------|----------|
| ANP32C  | 0.23858532 | 0.304916 |
| ANP32D  | 0.10618854 | 0        |
| ANP32E  | 9.54513336 | 8.846835 |
| ANPEP   | 443.386788 | 607.3034 |
| ANTXR1  | 0.00590185 | 0.006705 |
| ANTXR2  | 14.9827395 | 10.572   |
| ANTXRL  | 0          | 0        |
| ANUBL1  | 2.47189702 | 2.892035 |
| ANXA1   | 347.150908 | 200.6417 |
| ANXA10  | 0          | 0        |
| ANXA11  | 246.612499 | 229.6033 |
| ANXA13  | 0          | 0        |
| ANXA2   | 9.75844555 | 9.14805  |
| ANXA2P1 | 0          | 0        |
| ANXA2P2 | 0          | 0        |
| ANXA2P3 | 0          | 0        |
| ANXA3   | 0.18192499 | 0.177145 |
| ANXA4   | 4.75082175 | 4.649902 |
| ANXA5   | 44.1282118 | 43.34871 |
| ANXA6   | 18.5441255 | 14.89644 |
| ANXA7   | 47.3165343 | 46.05795 |
| ANXA8   | 0.0514822  | 0.011697 |
| ANXA8L1 | 0.0215203  | 0.012224 |
| ANXA8L2 | 0.06214384 | 0.070596 |
| ANXA9   | 3.68865455 | 2.592791 |
| AOAH    | 13.0447198 | 11.74678 |
| AOC2    | 0.37869264 | 0.519826 |
| AOC3    | 0.17756117 | 0.237309 |
| AOF1    | 12.3764593 | 12.34629 |
| AOX1    | 0          | 0        |
| AOX2P   | 0          | 0        |
| AP1B1   | 21.1310871 | 23.43887 |
| AP1G1   | 27.5109549 | 25.6669  |
| AP1G2   | 49.4343839 | 43.74231 |
| AP1GBP1 | 16.0102657 | 14.98324 |
| AP1M1   | 38.5508369 | 39.339   |
| AP1M2   | 0.16810659 | 0.368303 |
| AP1S1   | 0.21073963 | 0.12891  |
| AP1S2   | 6.16116794 | 6.559774 |
| AP1S3   | 0.16286488 | 0.101461 |
| AP2A1   | 29.816431  | 27.61908 |
| AP2A2   | 4.86916785 | 4.915696 |
| AP2B1   | 18.3438078 | 18.1739  |
| AP2M1   | 79.0183959 | 79.76888 |
| AP2S1   | 19.3952772 | 17.01479 |
| AP3B1   | 7.45855945 | 6.36377  |
| AP3B2   | 0          | 0.006447 |

|          |            |          |
|----------|------------|----------|
| AP3D1    | 14.1902114 | 12.42369 |
| AP3M1    | 6.38004522 | 5.533634 |
| AP3M2    | 3.29988846 | 3.963496 |
| AP3S1    | 34.6616201 | 29.83322 |
| AP3S2    | 6.86671577 | 5.67543  |
| AP4B1    | 17.2079299 | 11.44254 |
| AP4E1    | 2.83505286 | 2.584396 |
| AP4M1    | 5.6840429  | 5.971277 |
| AP4S1    | 1.1296105  | 1.148721 |
| APAF1    | 14.3706719 | 13.57176 |
| APBA1    | 0.0063868  | 0.010883 |
| APBA2    | 0.01155555 | 0.013127 |
| APBA3    | 9.40196681 | 8.179377 |
| APBB1    | 0.10082232 | 0.176209 |
| APBB1IP  | 38.5185339 | 42.88813 |
| APBB2    | 0.01888644 | 0.005364 |
| APBB3    | 3.69258593 | 3.973473 |
| APC      | 5.47034057 | 4.565895 |
| APC2     | 0.39353885 | 0.400007 |
| APCDD1   | 0          | 0        |
| APCDD1L  | 0.01351242 | 0.007675 |
| APCS     | 0          | 0        |
| APEH     | 19.3405601 | 19.27783 |
| APEX1    | 1.86076895 | 1.450388 |
| APEX2    | 8.73130841 | 8.408718 |
| APH1A    | 51.1561958 | 48.1303  |
| APH1B    | 9.64266908 | 9.302262 |
| API5     | 15.1942612 | 15.21978 |
| API5L1   | 0          | 0        |
| APIP     | 3.90780575 | 2.826752 |
| APITD1   | 0.09442514 | 0.062573 |
| APLF     | 0.89039463 | 0.539882 |
| APLN     | 0.08097047 | 0.053657 |
| APLNR    | 0          | 0.006209 |
| APLP1    | 0.10298121 | 0.077992 |
| APLP2    | 106.158065 | 106.1108 |
| APOA1    | 0.02343961 | 0        |
| APOA1BP  | 2.30697209 | 2.343766 |
| APOA2    | 0.22225508 | 0.201988 |
| APOA4    | 0          | 0        |
| APOA5    | 0          | 0        |
| APOB     | 0          | 0        |
| APOB48R  | 165.121786 | 126.4893 |
| APOBEC1  | 0          | 0        |
| APOBEC2  | 0.81548501 | 0.865986 |
| APOBEC3A | 39.0366429 | 36.25773 |
| APOBEC3B | 1.88899458 | 1.959325 |

|          |            |          |
|----------|------------|----------|
| APOBEC3C | 26.3422958 | 22.78305 |
| APOBEC3D | 3.21722004 | 3.206311 |
| APOBEC3F | 2.08039237 | 1.874552 |
| APOBEC3G | 4.75063828 | 4.937219 |
| APOBEC3H | 0.09181367 | 0.104302 |
| APOBEC4  | 0          | 0        |
| APOC1    | 0.04560809 | 0.051812 |
| APOC1P1  | 0          | 0        |
| APOC2    | 0.23329077 | 0.397533 |
| APOC3    | 0          | 0        |
| APOC4    | 0.13719629 | 0.077929 |
| APOD     | 0          | 0        |
| APOE     | 0.01781808 | 0.020242 |
| APOF     | 0.02489678 | 0        |
| APOH     | 0          | 0        |
| APOL1    | 1.83696445 | 1.45374  |
| APOL2    | 7.38317258 | 5.349988 |
| APOL3    | 0.0410952  | 0.075863 |
| APOL4    | 0.03694055 | 0.027977 |
| APOL5    | 0          | 0        |
| APOL6    | 0.7527562  | 0.734999 |
| APOLD1   | 0.11327364 | 0.079188 |
| APOM     | 2.84574125 | 2.13428  |
| APOO     | 0.43292982 | 0.555965 |
| APOOL    | 0.80090089 | 0.611655 |
| APP      | 0.29128292 | 0.276754 |
| APPBP2   | 6.04949612 | 5.731245 |
| APPL1    | 2.85148029 | 2.790077 |
| APPL2    | 25.1457751 | 37.10696 |
| APRT     | 8.70193376 | 8.820028 |
| APT X    | 4.68538625 | 3.984283 |
| AQP1     | 0          | 0        |
| AQP10    | 0.03521831 | 0.040009 |
| AQP11    | 0.18902441 | 0.033036 |
| AQP12A   | 0          | 0        |
| AQP12B   | 0.01887373 | 0.021441 |
| AQP2     | 0          | 0.005716 |
| AQP3     | 0.24206796 | 0.353562 |
| AQP4     | 0.01208816 | 0        |
| AQP5     | 0.02309207 | 0.013116 |
| AQP6     | 0.00792213 | 0        |
| AQP7     | 0.03347983 | 0.038034 |
| AQP7P1   | 0          | 0        |
| AQP7P2   | 0          | 0        |
| AQP7P3   | 0          | 0        |
| AQP8     | 0.03214882 | 0        |
| AQP9     | 0.354946   | 0.213472 |

|           |            |          |
|-----------|------------|----------|
| AQR       | 8.53015888 | 7.955434 |
| AR        | 0.00935291 | 0.010625 |
| ARAF      | 46.4958188 | 43.17503 |
| ARAF3P    | 0          | 0        |
| ARAP1     | 167.044504 | 172.8392 |
| ARAP2     | 0.09427119 | 0.087622 |
| ARAP3     | 132.61302  | 162.1981 |
| ARC       | 0.02143255 | 0.024348 |
| ARCN1     | 25.6952999 | 24.36091 |
| ARD1A     | 73.850879  | 78.53381 |
| ARD1B     | 0          | 0        |
| AREG      | 8.74640181 | 4.167353 |
| AREGB     | 1.83865242 | 0.657566 |
| ARF1      | 131.556586 | 135.3671 |
| ARF1P1    | 0          | 0        |
| ARF3      | 33.4312868 | 33.5418  |
| ARF4      | 36.8064127 | 40.96159 |
| ARF4P     | 0          | 0        |
| ARF4P2    | 0          | 0        |
| ARF4P3    | 0          | 0        |
| ARF5      | 49.3170851 | 46.50025 |
| ARF6      | 34.8500599 | 40.63925 |
| ARFGAP1   | 24.3650253 | 23.27342 |
| ARFGAP2   | 30.3276316 | 26.6178  |
| ARFGAP3   | 13.1510365 | 12.12382 |
| ARFGEF1   | 21.6317188 | 23.63341 |
| ARFGEF2   | 5.04150262 | 4.172732 |
| ARFIP1    | 4.93153185 | 4.0182   |
| ARFIP2    | 5.82327156 | 5.189215 |
| ARFRP1    | 5.08949694 | 5.434662 |
| ARG1      | 0.07265145 | 0.033013 |
| ARG2      | 4.97772853 | 4.147641 |
| ARGFX     | 0.02490661 | 0.009431 |
| ARGFXP1   | 0          | 0        |
| ARGFXP2   | 0          | 0        |
| ARGLU1    | 133.440607 | 128.2375 |
| ARHGAP1   | 16.3313913 | 13.82709 |
| ARHGAP10  | 6.14385489 | 5.619566 |
| ARHGAP11A | 1.6550031  | 1.908535 |
| ARHGAP11B | 0.95099825 | 0.822005 |
| ARHGAP12  | 0.13103035 | 0.080151 |
| ARHGAP15  | 27.0855031 | 28.28464 |
| ARHGAP16P | 0          | 0        |
| ARHGAP17  | 14.7539822 | 13.76139 |
| ARHGAP18  | 26.2350943 | 26.65657 |
| ARHGAP19  | 8.36702718 | 9.627496 |
| ARHGAP20  | 0          | 0        |

|           |            |          |
|-----------|------------|----------|
| ARHGAP21  | 4.22736179 | 4.495746 |
| ARHGAP22  | 0.05353849 | 0.095575 |
| ARHGAP23  | 0.0603021  | 0.038058 |
| ARHGAP24  | 0.00370034 | 0.008407 |
| ARHGAP25  | 124.331584 | 99.66224 |
| ARHGAP26  | 28.1717575 | 26.81758 |
| ARHGAP27  | 50.1814611 | 55.18329 |
| ARHGAP28  | 0.00364517 | 0        |
| ARHGAP29  | 0.00230617 | 0.00262  |
| ARHGAP30  | 143.271594 | 126.5128 |
| ARHGAP4   | 156.094397 | 172.0909 |
| ARHGAP5   | 0.56482043 | 0.572009 |
| ARHGAP6   | 2.63913351 | 2.599414 |
| ARHGAP8   | 0          | 0        |
| ARHGAP9   | 206.938728 | 195.6652 |
| ARHGDIA   | 48.7918663 | 42.3826  |
| ARHGDIB   | 645.681689 | 611.3881 |
| ARHGDIG   | 0.02231988 | 0        |
| ARHGEF1   | 120.920924 | 141.6528 |
| ARHGEF10  | 0.11657758 | 0.149522 |
| ARHGEF10L | 0          | 0.005315 |
| ARHGEF11  | 0.35098172 | 0.398721 |
| ARHGEF12  | 0.06417583 | 0.062849 |
| ARHGEF15  | 0          | 0.005735 |
| ARHGEF16  | 0          | 0        |
| ARHGEF17  | 1.80570806 | 3.851944 |
| ARHGEF18  | 30.3142621 | 29.74257 |
| ARHGEF19  | 2.85983373 | 4.778599 |
| ARHGEF2   | 44.2114698 | 50.68775 |
| ARHGEF3   | 0.54587618 | 0.470261 |
| ARHGEF4   | 0.009878   | 0.011222 |
| ARHGEF5   | 0.29116712 | 0.417815 |
| ARHGEF5L  | 0.2740528  | 0.099625 |
| ARHGEF6   | 169.107949 | 155.0176 |
| ARHGEF7   | 7.71088448 | 6.564324 |
| ARHGEF9   | 0.47065878 | 0.337459 |
| ARID1A    | 26.0802271 | 26.82867 |
| ARID1B    | 5.49294404 | 5.873009 |
| ARID2     | 13.66423   | 14.69332 |
| ARID3A    | 33.5079575 | 44.80891 |
| ARID3B    | 21.5359674 | 25.55217 |
| ARID3C    | 0          | 0.019278 |
| ARID4A    | 23.2837691 | 23.65751 |
| ARID4B    | 25.2636662 | 22.89695 |
| ARID5A    | 56.9666379 | 91.61011 |
| ARID5B    | 0.23806489 | 0.108178 |
| ARIH1     | 15.7880175 | 16.20239 |

|         |            |          |
|---------|------------|----------|
| ARIH2   | 28.5975535 | 33.00434 |
| ARIH2P  | 0          | 0        |
| ARL1    | 2.87216931 | 2.486321 |
| ARL10   | 0.09616575 | 0.039726 |
| ARL11   | 4.94037831 | 4.285398 |
| ARL13A  | 0.17681853 | 0.23739  |
| ARL13B  | 0.84944915 | 0.7853   |
| ARL14   | 0.01631135 | 0        |
| ARL15   | 1.99596867 | 1.825491 |
| ARL16   | 7.62973899 | 6.88651  |
| ARL17   | 1.84517916 | 1.020495 |
| ARL17P1 | 0.24973319 | 0.175227 |
| ARL2    | 3.65470988 | 2.784154 |
| ARL2BP  | 9.32123006 | 8.223302 |
| ARL3    | 4.49301    | 4.357335 |
| ARL4A   | 0.08159084 | 0.064169 |
| ARL4C   | 85.2708546 | 42.01491 |
| ARL4D   | 0.17244751 | 0.27125  |
| ARL4P   | 0          | 0        |
| ARL4P2  | 0          | 0        |
| ARL5A   | 6.13045308 | 7.808449 |
| ARL5B   | 5.39546665 | 5.190968 |
| ARL5C   | 0          | 0        |
| ARL6    | 0.17364348 | 0.180823 |
| ARL6IP1 | 22.8826924 | 22.95671 |
| ARL6IP4 | 52.245637  | 51.82216 |
| ARL6IP5 | 109.898852 | 133.2762 |
| ARL6IP6 | 15.9972091 | 8.908041 |
| ARL8A   | 47.0357724 | 59.05581 |
| ARL8B   | 21.9339634 | 24.20518 |
| ARL9    | 0.05029983 | 0        |
| ARMC1   | 3.90504448 | 3.588627 |
| ARMC10  | 1.99936582 | 1.807964 |
| ARMC2   | 0.0554433  | 0.132967 |
| ARMC3   | 0          | 0        |
| ARMC4   | 0.0117723  | 0        |
| ARMC5   | 0.94035826 | 1.032483 |
| ARMC6   | 1.5247728  | 1.502602 |
| ARMC7   | 11.9268811 | 11.74033 |
| ARMC8   | 9.45575707 | 8.532838 |
| ARMC9   | 0.02843823 | 0.032306 |
| ARMCX1  | 0          | 0.011156 |
| ARMCX2  | 0.02181805 | 0.016524 |
| ARMCX3  | 11.0739478 | 9.595403 |
| ARMCX5  | 0.87129429 | 0.584147 |
| ARMCX6  | 6.46233116 | 5.131163 |
| ARMET   | 12.0625327 | 10.18188 |

|         |            |          |
|---------|------------|----------|
| ARMETL1 | 0.23712779 | 0.161629 |
| ARMS2   | 0          | 0        |
| ARNT    | 25.2922876 | 25.30118 |
| ARNT2   | 0.01923342 | 0.021849 |
| ARNTL   | 23.3207368 | 21.87733 |
| ARNTL2  | 0.04357582 | 0.037127 |
| ARP11   | 0.19210962 | 0.121244 |
| ARPC1A  | 28.7201005 | 24.88969 |
| ARPC1B  | 232.814043 | 259.5934 |
| ARPC2   | 458.155016 | 459.1179 |
| ARPC3   | 305.319201 | 281.1364 |
| ARPC3B  | 0          | 0        |
| ARPC4   | 109.201909 | 102.9501 |
| ARPC5   | 146.201368 | 133.465  |
| ARPC5L  | 10.7075344 | 9.390926 |
| ARPM1   | 0.05243225 | 0.011913 |
| ARPP19  | 26.6217674 | 24.02855 |
| ARPP-21 | 0.01163764 | 0.013221 |
| ARR3    | 0.16062132 | 0.164222 |
| ARRB1   | 37.9486237 | 35.94687 |
| ARRB2   | 531.286776 | 484.5229 |
| ARRDC1  | 95.3113251 | 113.402  |
| ARRDC2  | 44.1803521 | 82.45315 |
| ARRDC3  | 11.1922874 | 9.023646 |
| ARRDC4  | 7.2841631  | 4.422298 |
| ARRDC5  | 1.84838074 | 2.376845 |
| ARSA    | 17.2481415 | 16.34979 |
| ARSB    | 11.2869516 | 10.80551 |
| ARSD    | 2.89476783 | 2.619462 |
| ARSDP1  | 0          | 0        |
| ARSE    | 0.00947087 | 0        |
| ARSEP1  | 0          | 0        |
| ARSF    | 0          | 0        |
| ARSFP1  | 0          | 0        |
| ARSG    | 5.44229686 | 6.294632 |
| ARSH    | 0.01244839 | 0        |
| ARSI    | 0.00663888 | 0.007542 |
| ARSJ    | 0          | 0        |
| ARSK    | 0.35827918 | 0.285622 |
| ART1    | 0.0160254  | 0.018205 |
| ART2P   | 0          | 0        |
| ART3    | 0          | 0        |
| ART4    | 0          | 0        |
| ART5    | 0.02692104 | 0.015291 |
| ARTN    | 0.02788505 | 0.010559 |
| ARV1    | 0.62566729 | 0.33059  |
| ARVCF   | 0.15171301 | 0.21395  |



|          |            |          |
|----------|------------|----------|
| ARVP6125 | 0          | 0        |
| ARX      | 0.02193185 | 0.008305 |
| AS3MT    | 0.89487627 | 0.590592 |
| ASAH1    | 191.073551 | 193.7258 |
| ASAH2    | 0          | 0        |
| ASAH2B   | 0          | 0        |
| ASAH2C   | 0.01457057 | 0.016552 |
| ASAM     | 0.0477306  | 0.06326  |
| ASAP1    | 24.8670995 | 20.41817 |
| ASAP2    | 0.86425621 | 0.622509 |
| ASAP3    | 0.01012781 | 0.011505 |
| ASB1     | 5.30479593 | 5.442575 |
| ASB10    | 0          | 0.010318 |
| ASB11    | 0.01826701 | 0        |
| ASB12    | 0          | 0.06703  |
| ASB13    | 2.58286977 | 2.916664 |
| ASB14    | 0.29073368 | 0.217683 |
| ASB15    | 0.00776989 | 0        |
| ASB16    | 0.36369203 | 0.368494 |
| ASB17    | 0          | 0        |
| ASB18    | 0          | 0        |
| ASB2     | 19.537762  | 15.64466 |
| ASB3     | 8.36644832 | 9.331807 |
| ASB4     | 0          | 0        |
| ASB5     | 0          | 0        |
| ASB6     | 12.1881358 | 17.59057 |
| ASB7     | 6.15765246 | 5.766495 |
| ASB8     | 39.4194781 | 32.87059 |
| ASB9     | 0.02470662 | 0.028067 |
| ASCC1    | 8.41620907 | 7.190845 |
| ASCC2    | 43.0335073 | 52.30504 |
| ASCC3    | 0.47092573 | 0.398389 |
| ASCL1    | 0.0084643  | 0        |
| ASCL2    | 8.27822658 | 16.8578  |
| ASCL3    | 0.03234666 | 0        |
| ASCL4    | 0          | 0        |
| ASCL5    | 0.01768321 | 0.040177 |
| ASF1A    | 5.99167463 | 4.959802 |
| ASF1B    | 0.60731747 | 0.565736 |
| ASFMR1   | 0          | 0        |
| ASGR1    | 0          | 0.015881 |
| ASGR2    | 0.0136351  | 0        |
| ASH1L    | 15.9377509 | 15.93693 |
| ASH2L    | 20.8727102 | 21.9284  |
| ASH2LP1  | 0          | 0        |
| ASIP     | 0          | 0        |
| ASL      | 17.6616749 | 20.33447 |

|                 |            |          |
|-----------------|------------|----------|
| ASLL            | 0          | 0        |
| ASMT (NC_0000:  | 0.29946124 | 0.501337 |
| ASMT (NC_0000:  | 0.5334122  | 0.892115 |
| ASMTL (NC_0000: | 2.47474232 | 1.224296 |
| ASMTL (NC_0000: | 9.45124623 | 10.66337 |
| ASMTLAS         | 0          | 0        |
| ASNA1           | 10.315553  | 8.919596 |
| ASNS            | 0.59355805 | 0.579321 |
| ASNSD1          | 23.9183348 | 21.10125 |
| ASNSL1          | 0          | 0        |
| ASPA            | 0          | 0        |
| ASPDH           | 0.06690638 | 0.11401  |
| ASPG            | 0.02280405 | 0        |
| ASPH            | 0.15376888 | 0.16595  |
| ASPHD1          | 0.01422553 | 0        |
| ASPHD2          | 1.80869886 | 1.665397 |
| ASPM            | 0.04441427 | 0.035099 |
| ASPN            | 0          | 0        |
| ASPRV1          | 1.70945502 | 1.437276 |
| ASPSCR1         | 3.04599206 | 2.954859 |
| ASRGL1          | 37.652639  | 29.32566 |
| ASS1            | 0.04550937 | 0.012925 |
| ASS1P6          | 0          | 0        |
| ASSP10          | 0          | 0        |
| ASSP11          | 0          | 0        |
| ASSP12          | 0          | 0        |
| ASSP13          | 0          | 0        |
| ASSP14          | 0          | 0        |
| ASSP2           | 0          | 0        |
| ASSP3           | 0          | 0        |
| ASSP4           | 0          | 0        |
| ASSP5           | 0          | 0        |
| ASSP7           | 0          | 0        |
| ASSP8           | 0          | 0        |
| ASSP9           | 0          | 0        |
| ASTE1           | 5.36296008 | 4.943913 |
| ASTL            | 0.01622325 | 0.110579 |
| ASTN1           | 0          | 0        |
| ASTN2           | 0.01283859 | 0.004862 |
| ASXL1           | 14.394564  | 12.74914 |
| ASXL2           | 16.7698556 | 15.79467 |
| ASXL3           | 0.00275129 | 0.006251 |
| ASZ1            | 0          | 0        |
| ATAD1           | 5.17663884 | 4.487315 |
| ATAD2           | 5.71632089 | 5.9187   |
| ATAD2B          | 6.08332561 | 6.264169 |
| ATAD3A          | 1.61051941 | 1.280703 |

|         |            |          |
|---------|------------|----------|
| ATAD3B  | 5.89366038 | 5.281623 |
| ATAD3C  | 0.1906936  | 0.167115 |
| ATAD4   | 0.04554223 | 0.051737 |
| ATAD5   | 2.41732388 | 2.199189 |
| ATCAY   | 0          | 0.009486 |
| ATCD1   | 0          | 0        |
| ATE1    | 4.72125695 | 4.59722  |
| ATF1    | 10.9221379 | 10.95836 |
| ATF2    | 8.4360281  | 7.8297   |
| ATF3    | 0.3124246  | 0.172663 |
| ATF4    | 141.45826  | 188.4348 |
| ATF4C   | 0          | 0        |
| ATF4P1  | 0          | 0        |
| ATF4P2  | 0          | 0        |
| ATF5    | 2.32684052 | 1.681156 |
| ATF6    | 6.29576831 | 5.606473 |
| ATF6B   | 34.1018652 | 31.29899 |
| ATF7    | 8.55591135 | 7.54117  |
| ATF7IP  | 8.71958051 | 6.344082 |
| ATF7IP2 | 0.01169048 | 0.039842 |
| ATG10   | 0.53799856 | 0.46331  |
| ATG12   | 14.0376839 | 12.68675 |
| ATG12P  | 0          | 0        |
| ATG16L1 | 10.1761367 | 7.28829  |
| ATG16L2 | 194.217206 | 183.2973 |
| ATG2A   | 42.020621  | 40.31157 |
| ATG2B   | 7.15304529 | 6.630329 |
| ATG3    | 32.5537129 | 27.44288 |
| ATG3P   | 0          | 0        |
| ATG4A   | 7.01768962 | 5.682429 |
| ATG4B   | 31.8427114 | 32.20122 |
| ATG4C   | 2.02457531 | 1.427555 |
| ATG4D   | 11.4552568 | 11.46384 |
| ATG5    | 7.52478707 | 7.171423 |
| ATG7    | 6.45620438 | 5.376632 |
| ATG9A   | 11.4516446 | 11.28101 |
| ATG9B   | 0.0413794  | 0.047008 |
| ATHL1   | 14.4565235 | 14.49332 |
| ATIC    | 0.32756114 | 0.255829 |
| ATL1    | 1.28316885 | 1.156388 |
| ATL2    | 41.7884696 | 44.55055 |
| ATL3    | 2.13422021 | 1.672805 |
| ATM     | 3.97206365 | 2.988545 |
| ATMIN   | 7.97199663 | 7.9028   |
| ATN1    | 15.3158046 | 15.93962 |
| ATOH1   | 0          | 0.022427 |
| ATOH7   | 0          | 0        |

|          |            |          |
|----------|------------|----------|
| ATOH8    | 0.02592519 | 0.049086 |
| ATOX1    | 6.87945389 | 7.619789 |
| ATP10A   | 0.0281141  | 0.036501 |
| ATP10B   | 0.01111569 | 0        |
| ATP10D   | 6.85650488 | 3.810678 |
| ATP11A   | 10.7204257 | 11.18055 |
| ATP11B   | 61.4966523 | 61.39602 |
| ATP11C   | 5.07934605 | 4.770775 |
| ATP12A   | 0          | 0        |
| ATP13A1  | 18.8667956 | 17.02903 |
| ATP13A2  | 0.59456016 | 0.78302  |
| ATP13A3  | 23.9059849 | 26.0233  |
| ATP13A4  | 0.05411292 | 0.055885 |
| ATP13A5  | 0          | 0        |
| ATP1A1   | 73.9209961 | 89.39007 |
| ATP1A2   | 0          | 0.013114 |
| ATP1A3   | 0.14210305 | 0.18161  |
| ATP1A4   | 0          | 0        |
| ATP1B1   | 0.1815824  | 0.184567 |
| ATP1B2   | 0.02524049 | 0.028674 |
| ATP1B3   | 24.5654838 | 24.55539 |
| ATP1B3P1 | 0          | 0        |
| ATP1B4   | 0.00539803 | 0        |
| ATP1BL1  | 0          | 0        |
| ATP2A1   | 0.2140588  | 0.236419 |
| ATP2A2   | 11.7554737 | 12.44094 |
| ATP2A3   | 774.785827 | 936.3042 |
| ATP2B1   | 8.64303956 | 5.929074 |
| ATP2B2   | 0.01173027 | 0.007995 |
| ATP2B3   | 0.01279302 | 0.003633 |
| ATP2B4   | 0.90172633 | 0.911748 |
| ATP2C1   | 10.7922893 | 9.435091 |
| ATP2C2   | 0.04347927 | 0.021168 |
| ATP4A    | 0          | 0.013422 |
| ATP4B    | 0.04238978 | 0.016052 |
| ATP5A1   | 35.7864466 | 33.0569  |
| ATP5AP2  | 0          | 0        |
| ATP5AP3  | 0          | 0        |
| ATP5B    | 89.0182623 | 81.97141 |
| ATP5C1   | 29.9446133 | 28.02547 |
| ATP5C2   | 0          | 0        |
| ATP5D    | 6.58624825 | 7.554026 |
| ATP5E    | 216.431596 | 190.1015 |
| ATP5EP1  | 0          | 0        |
| ATP5EP2  | 0          | 0        |
| ATP5F1   | 18.3425146 | 17.19141 |
| ATP5G1   | 5.14241841 | 4.473836 |

|           |            |          |
|-----------|------------|----------|
| ATP5G2    | 19.7837419 | 17.1854  |
| ATP5G3    | 8.31942905 | 7.305735 |
| ATP5GP1   | 0          | 0        |
| ATP5GP2   | 0          | 0        |
| ATP5GP3   | 0          | 0        |
| ATP5GP4   | 0          | 0        |
| ATP5H     | 32.6872911 | 29.79879 |
| ATP5HP1   | 0          | 0        |
| ATP5I     | 42.2842767 | 37.5527  |
| ATP5J     | 11.129149  | 10.87362 |
| ATP5J2    | 57.8515167 | 50.42412 |
| ATP5J2LP  | 0          | 0        |
| ATP5J2P2  | 0          | 0        |
| ATP5J2P4  | 0          | 0        |
| ATP5J2P5  | 0          | 0        |
| ATP5J2P6  | 0          | 0        |
| ATP5JP1   | 0          | 0        |
| ATP5L     | 52.1704774 | 55.98184 |
| ATP5L2    | 0          | 0        |
| ATP5LP1   | 0          | 0        |
| ATP5LP2   | 0          | 0        |
| ATP5LP3   | 0          | 0        |
| ATP5O     | 32.0858028 | 29.42669 |
| ATP5S     | 2.40225351 | 2.79276  |
| ATP5SL    | 9.02150726 | 7.552325 |
| ATP6      | 0          | 0        |
| ATP6AP1   | 51.2561308 | 50.9109  |
| ATP6AP1L  | 0.05547581 | 0        |
| ATP6AP2   | 43.3408761 | 37.6041  |
| ATP6VOA1  | 18.938462  | 16.21042 |
| ATP6VOA2  | 32.0702549 | 25.83939 |
| ATP6VOA4  | 0.01252626 | 0.01423  |
| ATP6VOB   | 141.416952 | 146.3489 |
| ATP6VOC   | 154.69873  | 178.6029 |
| ATP6VOD1  | 93.065417  | 99.14466 |
| ATP6VOD2  | 0          | 0        |
| ATP6VOE1  | 128.225913 | 117.8549 |
| ATP6VOE2  | 0.21588165 | 0.192692 |
| ATP6V1A   | 13.1864738 | 10.54326 |
| ATP6V1B1  | 0.02168678 | 0        |
| ATP6V1B2  | 34.9155874 | 25.73691 |
| ATP6V1C1  | 8.31945512 | 7.704874 |
| ATP6V1C2  | 0.0778716  | 0.051604 |
| ATP6V1D   | 11.1488424 | 10.13221 |
| ATP6V1E1  | 63.539567  | 59.49193 |
| ATP6V1E2  | 0.08499376 | 0        |
| ATP6V1EL1 | 0          | 0        |

|           |            |          |
|-----------|------------|----------|
| ATP6V1F   | 79.202513  | 77.32415 |
| ATP6V1G1  | 28.0990301 | 29.81561 |
| ATP6V1G2  | 0.31656709 | 0.179813 |
| ATP6V1G3  | 0          | 0        |
| ATP6V1GP1 | 0          | 0        |
| ATP6V1GP2 | 0          | 0        |
| ATP6V1H   | 11.0220898 | 10.964   |
| ATP7A     | 10.2451424 | 9.235501 |
| ATP7B     | 0.03482063 | 0.061133 |
| ATP8      | 0          | 0        |
| ATP8A1    | 2.13932239 | 2.387366 |
| ATP8A2    | 0          | 0.009543 |
| ATP8B1    | 0.01084153 | 0.016422 |
| ATP8B2    | 24.5812572 | 22.35416 |
| ATP8B3    | 0.38002563 | 0.319094 |
| ATP8B4    | 3.61471253 | 2.818923 |
| ATP9A     | 0.00554758 | 0.022057 |
| ATP9B     | 7.13548979 | 6.412478 |
| ATPAF1    | 1.84754179 | 1.994762 |
| ATPAF2    | 10.6887797 | 15.34372 |
| ATPBD3    | 1.03779517 | 0.759517 |
| ATPBD4    | 0.09337675 | 0.053039 |
| ATPGD1    | 0.04266937 | 0.060591 |
| ATPIF1    | 13.4887785 | 12.29877 |
| ATQL3     | 0          | 0        |
| ATQL4     | 0          | 0        |
| ATR       | 1.90606564 | 1.618201 |
| ATRIP     | 0.85475638 | 0.628305 |
| ATRN      | 1.34373321 | 1.310385 |
| ATRN1     | 0.00240785 | 0        |
| ATRX      | 8.99366804 | 7.882684 |
| ATXN1     | 6.76266051 | 7.049206 |
| ATXN10    | 12.389547  | 15.15491 |
| ATXN1L    | 14.8987268 | 14.15639 |
| ATXN2     | 6.56426751 | 6.659587 |
| ATXN2L    | 36.5235083 | 35.00998 |
| ATXN3     | 4.00583729 | 3.605365 |
| ATXN3L    | 0          | 0        |
| ATXN7     | 15.7963825 | 13.36374 |
| ATXN7L1   | 1.13457783 | 0.823275 |
| ATXN7L2   | 3.36334859 | 3.200685 |
| ATXN7L3   | 33.7312864 | 31.53839 |
| ATXN8OS   | 0          | 0        |
| AUH       | 5.57409593 | 4.752956 |
| AUP1      | 66.9321671 | 62.64067 |
| AURKA     | 11.5404055 | 10.30614 |
| AURKAIP1  | 30.5939646 | 34.17216 |

|          |            |          |
|----------|------------|----------|
| AURKAPS1 | 0          | 0        |
| AURKAPS2 | 0          | 0        |
| AURKB    | 2.0072727  | 2.415565 |
| AURKC    | 0.6787578  | 0.936311 |
| AUTS2    | 0.08193324 | 0.089498 |
| AVEN     | 1.38704012 | 1.965724 |
| AVIL     | 0.84535635 | 0.845802 |
| AVL9     | 20.2479388 | 18.58633 |
| AVP      | 2.00402993 | 2.083677 |
| AVPI1    | 0.54375856 | 0.669195 |
| AVPR1A   | 0          | 0        |
| AVPR1B   | 0.02371724 | 0.026943 |
| AVPR2    | 0.57253219 | 0.802628 |
| AWAT1    | 0          | 0        |
| AWAT2    | 0          | 0        |
| AXIN1    | 51.8559787 | 57.80778 |
| AXIN2    | 0.06952164 | 0.056413 |
| AXL      | 0.05770093 | 0.070591 |
| AZFP     | 0          | 0        |
| AZGP1    | 0          | 0        |
| AZGP1P1  | 0          | 0        |
| AZGP1P2  | 0          | 0        |
| AZI1     | 1.35366182 | 1.234185 |
| AZI2     | 7.03903986 | 6.575737 |
| AZIN1    | 26.3058419 | 28.94998 |
| AZU1     | 0.32275727 | 0.628556 |
| B2M      | 4533.0784  | 4172.271 |
| B3GALNT1 | 0.01732381 | 0.01312  |
| B3GALNT2 | 1.18260946 | 1.117571 |
| B3GALT1  | 0          | 0        |
| B3GALT2  | 0          | 0        |
| B3GALT4  | 8.01855742 | 7.961703 |
| B3GALT5  | 0          | 0        |
| B3GALT6  | 1.74646501 | 1.385388 |
| B3GALTL  | 4.33974803 | 5.559025 |
| B3GAT1   | 0.01725273 | 0        |
| B3GAT2   | 0          | 0        |
| B3GAT3   | 9.85653518 | 11.26344 |
| B3GAT3P  | 0          | 0        |
| B3GNT1   | 0.01015716 | 0.011539 |
| B3GNT2   | 11.4725342 | 10.7218  |
| B3GNT3   | 0          | 0        |
| B3GNT4   | 0          | 0.031762 |
| B3GNT5   | 0.10199045 | 0.005793 |
| B3GNT6   | 0          | 0        |
| B3GNT7   | 0.4545225  | 0.782845 |
| B3GNT8   | 45.9550457 | 51.98899 |

|             |            |          |
|-------------|------------|----------|
| B3GNT9      | 0.86277698 | 1.041938 |
| B3GNTL1     | 8.37668645 | 9.792377 |
| B4GALNT1    | 0.00698516 | 0.007935 |
| B4GALNT2    | 0          | 0        |
| B4GALNT3    | 0.01834671 | 0.006947 |
| B4GALNT4    | 0.01347778 | 0.022966 |
| B4GALT1     | 19.7534962 | 20.41526 |
| B4GALT2     | 0.03636028 | 0.092938 |
| B4GALT3     | 10.7769654 | 9.607966 |
| B4GALT4     | 4.50286525 | 3.556273 |
| B4GALT5     | 43.0601268 | 39.83883 |
| B4GALT6     | 0.10482093 | 0.089309 |
| B4GALT7     | 2.90223074 | 2.634705 |
| B9D1        | 0.04531321 | 0        |
| B9D2        | 4.17947755 | 2.834237 |
| bA255A11.4  | 0          | 0        |
| bA291L22.4  | 0          | 0        |
| bA327L3.4   | 0          | 0        |
| bA345E19.2  | 0          | 0        |
| BA393J16.4  | 0          | 0        |
| bA395L14.12 | 0          | 0        |
| BA775A3.1   | 0          | 0        |
| BAALC       | 0.0073799  | 0.008384 |
| BAAT        | 0.00595956 | 0        |
| BACE1       | 0.37114123 | 0.286539 |
| BACE2       | 16.641834  | 14.86734 |
| BACH1       | 25.5747264 | 22.11387 |
| BACH2       | 1.07921666 | 0.857946 |
| BAD         | 6.33851889 | 5.600512 |
| BAG1        | 15.1490901 | 15.34811 |
| BAG2        | 0.97292082 | 0.732958 |
| BAG3        | 0.02453364 | 0.102192 |
| BAG4        | 8.56623246 | 7.607769 |
| BAG5        | 10.2012833 | 9.804169 |
| BAGE2       | 0          | 0        |
| BAGE3       | 0.01341757 | 0.015243 |
| BAHCC1      | 5.80650418 | 7.396755 |
| BAHD1       | 10.9586292 | 11.72091 |
| BAI1        | 0.37273561 | 0.354302 |
| BAI2        | 0.02329677 | 0.017644 |
| BAI3        | 0.01491952 | 0.004237 |
| BAIAP2      | 0.45511233 | 0.443852 |
| BAIAP2L1    | 0.46607877 | 0.623601 |
| BAIAP2L2    | 0.15683231 | 0.155893 |
| BAIAP3      | 9.19480536 | 9.737816 |
| BAK1        | 21.8498537 | 18.65718 |
| BAMBI       | 3.74406996 | 5.001464 |



|          |            |          |
|----------|------------|----------|
| BANF1    | 3.96050071 | 3.441778 |
| BANF1P1  | 0          | 0        |
| BANF2    | 0          | 0        |
| BANK1    | 5.00518699 | 5.148926 |
| BANP     | 15.5044563 | 15.8572  |
| BAP1     | 23.9870582 | 23.57863 |
| BARD1    | 2.07269277 | 2.437069 |
| BARHL1   | 0          | 0        |
| BARHL2   | 0.01405437 | 0        |
| BARX1    | 0.01418713 | 0        |
| BARX2    | 0          | 0        |
| BASE     | 0          | 0        |
| BASP1    | 384.399679 | 322.8677 |
| BAT1     | 124.397411 | 111.475  |
| BAT2     | 48.6191772 | 48.41623 |
| BAT2D1   | 34.2613275 | 32.02316 |
| BAT2L    | 43.0751289 | 53.39926 |
| BAT2L2P1 | 0          | 0        |
| BAT3     | 45.7538365 | 43.18365 |
| BAT4     | 12.0588087 | 8.813693 |
| BAT5     | 45.9553662 | 45.71074 |
| BATF     | 1.63108306 | 0.964542 |
| BATF2    | 0.28492271 | 0.26787  |
| BATF3    | 0.06429765 | 0.097391 |
| BAX      | 43.6911734 | 42.16026 |
| BAZ1A    | 21.9025514 | 22.61462 |
| BAZ1B    | 14.9446783 | 15.25732 |
| BAZ2A    | 46.1597091 | 43.52469 |
| BAZ2B    | 13.7690749 | 10.33702 |
| BBC3     | 3.98427513 | 6.897609 |
| BBOX1    | 0.01114811 | 0        |
| BBS1     | 1.22907721 | 0.99226  |
| BBS10    | 1.80736867 | 1.299915 |
| BBS12    | 0.36943399 | 0.272426 |
| BBS2     | 9.25742184 | 7.172323 |
| BBS4     | 8.94335908 | 10.45692 |
| BBS5     | 0.02663963 | 0.007566 |
| BBS7     | 0.79610476 | 0.515965 |
| BBS9     | 0.91027808 | 0.903343 |
| BBX      | 9.43174752 | 8.35536  |
| BCAM     | 0.00687552 | 0        |
| BCAN     | 0.00519657 | 0.011807 |
| BCAP29   | 5.62022037 | 6.064152 |
| BCAP31   | 27.8924336 | 28.89006 |
| BCAR1    | 0          | 0.007425 |
| BCAR3    | 0.76913857 | 0.617653 |
| BCAR4    | 0          | 0        |

|          |            |          |
|----------|------------|----------|
| BCAS1    | 0.12705955 | 0.089354 |
| BCAS2    | 10.4320469 | 11.20988 |
| BCAS3    | 4.19457974 | 3.904742 |
| BCAS4    | 0.04700149 | 0.124587 |
| BCAT1    | 0.00762985 | 0.011557 |
| BCAT2    | 0.26614343 | 0.241875 |
| BCCIP    | 2.48090179 | 2.060648 |
| BCDIN3D  | 1.14915777 | 1.144293 |
| BCHE     | 0          | 0.009761 |
| BCKDHA   | 15.9120277 | 14.05484 |
| BCKDHB   | 0.04531321 | 0.064346 |
| BCKDK    | 23.1239956 | 25.28042 |
| BCL10    | 5.89845074 | 5.300471 |
| BCL11A   | 0.15530395 | 0.195674 |
| BCL11B   | 0.03497048 | 0.036671 |
| BCL2     | 0.26361064 | 0.248954 |
| BCL2A1   | 255.046406 | 223.6285 |
| BCL2L1   | 6.86055153 | 7.364342 |
| BCL2L10  | 0          | 0        |
| BCL2L11  | 9.6568685  | 12.40283 |
| BCL2L12  | 3.34365102 | 2.794107 |
| BCL2L13  | 6.75033643 | 6.015614 |
| BCL2L14  | 0.00771855 | 0        |
| BCL2L15  | 0.11415321 | 0.100862 |
| BCL2L2   | 2.25945616 | 2.151268 |
| BCL2L7P1 | 0          | 0        |
| BCL2L7P2 | 0          | 0        |
| BCL3     | 84.450994  | 111.6475 |
| BCL6     | 19.0493664 | 15.10641 |
| BCL6B    | 0.0357878  | 0.020328 |
| BCL7A    | 0.05094991 | 0.05788  |
| BCL7B    | 43.5767957 | 49.74751 |
| BCL7C    | 12.1054936 | 11.52498 |
| BCL8     | 0          | 0        |
| BCL9     | 1.83527897 | 1.590312 |
| BCL9L    | 19.5312829 | 38.23469 |
| BCLAF1   | 32.5700122 | 30.57084 |
| BCMO1    | 0          | 0        |
| BCO2     | 0.09095817 | 0.10333  |
| BCOR     | 27.6701584 | 53.45293 |
| BCORL1   | 6.43861767 | 6.190992 |
| BCORP1   | 0          | 0        |
| BCR      | 4.00959466 | 4.896327 |
| BCRL4    | 0          | 0        |
| BCS1L    | 1.5298046  | 1.29264  |
| BCYRN1   | 0          | 0        |
| BCYRN1P1 | 0          | 0        |

|         |            |          |
|---------|------------|----------|
| BDH1    | 0.14248666 | 0.161867 |
| BDH2    | 0.28801823 | 0.286294 |
| BDH2P1  | 0          | 0        |
| BDKRB1  | 0          | 0        |
| BDKRB2  | 0.00500961 | 0        |
| BDNF    | 0.00272067 | 0        |
| BDNFOS  | 0          | 0        |
| BDP1    | 3.98104912 | 3.1207   |
| BDP1P   | 0          | 0        |
| BEAN    | 0.66107835 | 0.776892 |
| BECN1   | 29.4531234 | 29.24616 |
| BECN1L1 | 0.01622325 | 0        |
| BEGAIN  | 6.30838587 | 5.709908 |
| BEND2   | 0.00453915 | 0.005157 |
| BEND3   | 0.29736325 | 0.306016 |
| BEND4   | 0.00479866 | 0.016354 |
| BEND5   | 0.01582041 | 0        |
| BEND6   | 0.00778716 | 0.026539 |
| BEND7   | 0.02038655 | 0.023159 |
| BEST1   | 3.19734323 | 3.017438 |
| BEST2   | 0.01100227 | 0        |
| BEST3   | 0          | 0        |
| BEST4   | 0.07021819 | 0.068373 |
| BET1    | 1.86830775 | 1.43576  |
| BET1L   | 40.2938092 | 40.78083 |
| BET3L   | 0          | 0        |
| BEX1    | 0.87808807 | 0.858977 |
| BEX2    | 0.33833866 | 0.274541 |
| BEX4    | 15.9377607 | 15.35605 |
| BEX5    | 0.04906728 | 0        |
| BEYLA   | 0          | 0        |
| BFAR    | 7.82009345 | 8.789343 |
| BFSP1   | 0.03881002 | 0.011022 |
| BFSP2   | 0          | 0        |
| BGLAP   | 1.33869148 | 1.118217 |
| BGN     | 0          | 0        |
| BHLHA15 | 0          | 0        |
| BHLHA9  | 0.05939359 | 0        |
| BHLHB9  | 0.01964525 | 0.011159 |
| BHLHE22 | 0          | 0.021244 |
| BHLHE23 | 0.01989151 | 0.022597 |
| BHLHE40 | 330.156581 | 445.719  |
| BHLHE41 | 0.04449805 | 0.025275 |
| BHMT    | 0          | 0        |
| BHMT2   | 0          | 0.035703 |
| BICC1   | 0          | 0        |
| BICD1   | 0.00585827 | 0.006655 |

|         |            |          |
|---------|------------|----------|
| BICD2   | 14.5532255 | 14.89469 |
| BID     | 25.711992  | 26.15245 |
| BIK     | 7.45845951 | 7.693519 |
| BIN1    | 0.07095162 | 0.125381 |
| BIN2    | 99.8679447 | 84.56474 |
| BIN3    | 30.7874948 | 29.39804 |
| BIRC2   | 26.2100439 | 25.39747 |
| BIRC3   | 4.57177305 | 2.42551  |
| BIRC5   | 0.03114864 | 0        |
| BIRC6   | 13.1510412 | 11.45658 |
| BIRC7   | 0          | 0.018067 |
| BIRC8   | 0          | 0        |
| BIVM    | 0.21804855 | 0.161009 |
| BLCAP   | 15.3856436 | 14.41524 |
| BLID    | 0          | 0        |
| BLK     | 0.21918299 | 0.239773 |
| BLM     | 1.24907554 | 1.455894 |
| BLMH    | 3.0011333  | 5.514229 |
| BLNK    | 0.11533369 | 0.104817 |
| BLOC1S1 | 67.523659  | 58.16776 |
| BLOC1S2 | 22.3356632 | 21.66932 |
| BLOC1S3 | 10.5045788 | 9.636723 |
| BLVRA   | 21.4532285 | 18.95784 |
| BLVRB   | 0.44212145 | 0.418547 |
| BLZF1   | 11.1748092 | 9.655025 |
| BLZF2P  | 0          | 0        |
| BMF     | 3.13527901 | 2.354447 |
| BMI1    | 8.88801065 | 7.770304 |
| BMP1    | 2.37891371 | 2.44962  |
| BMP10   | 0.01327357 | 0.060316 |
| BMP15   | 0.01783319 | 0.020259 |
| BMP2    | 0.00667471 | 0.03033  |
| BMP2K   | 32.9742848 | 32.5726  |
| BMP2KL  | 0          | 0        |
| BMP3    | 0.00366678 | 0        |
| BMP4    | 0.01013758 | 0        |
| BMP5    | 0.00968017 | 0        |
| BMP6    | 0.06771443 | 0.03077  |
| BMP6P1  | 0          | 0        |
| BMP7    | 0.00521591 | 0        |
| BMP8A   | 0.16069841 | 0.097646 |
| BMP8B   | 0.05572576 | 0.012661 |
| BMPER   | 0          | 0        |
| BMPR1A  | 0.03488716 | 0.079265 |
| BMPR1B  | 0.00756307 | 0.008592 |
| BMPR2   | 2.73311883 | 3.468981 |
| BMS1    | 1.75298174 | 1.730246 |

|         |            |          |
|---------|------------|----------|
| BMS1P1  | 0          | 0        |
| BMS1P2  | 0          | 0        |
| BMS1P3  | 0          | 0        |
| BMS1P4  | 0          | 0        |
| BMS1P5  | 0          | 0        |
| BMS1P6  | 0          | 0        |
| BMS1P7  | 0          | 0        |
| BMX     | 0.17227459 | 0.240185 |
| BNC1    | 0          | 0        |
| BNC2    | 0.13663375 | 0.184783 |
| BNIP1   | 0.3489052  | 0.327429 |
| BNIP2   | 39.5623583 | 38.32242 |
| BNIP3   | 2.59047428 | 2.086444 |
| BNIP3L  | 22.9536542 | 22.14491 |
| BNIP3P  | 0          | 0        |
| BNIPL   | 0.38068148 | 0.332662 |
| BOC     | 0.00491131 | 0.011159 |
| BOD1    | 9.73039142 | 6.781999 |
| BOD1L   | 40.9995948 | 43.70327 |
| BOD1P   | 0          | 0        |
| BOK     | 0.04041778 | 0.045915 |
| BOLA1   | 3.7045799  | 2.982155 |
| BOLA2   | 24.5399511 | 22.51485 |
| BOLA2B  | 2.9917467  | 1.982558 |
| BOLA3   | 0.15180744 | 0.21557  |
| BOLL    | 0          | 0        |
| BOP1    | 1.00120624 | 1.227974 |
| BPESC1  | 0          | 0        |
| BPGM    | 4.61239454 | 4.888168 |
| BPHL    | 0.08149353 | 0.030859 |
| BPI     | 0.21652102 | 0.181242 |
| BPIL1   | 0          | 0        |
| BPIL2   | 0.01379615 | 0        |
| BPIL3   | 0          | 0        |
| BPNT1   | 1.97352761 | 1.766392 |
| BPTF    | 19.4128676 | 18.62666 |
| BPY2    | 0          | 0        |
| BPY2B   | 0          | 0        |
| BPY2C   | 0          | 0        |
| BRAF    | 9.4389253  | 7.959001 |
| BRAFPS2 | 0          | 0        |
| BRAP    | 8.51771356 | 8.50158  |
| BRCA1   | 0.14479105 | 0.126527 |
| BRCA1P1 | 0          | 0        |
| BRCA2   | 0.28991542 | 0.237047 |
| BRCC3   | 4.87753045 | 5.155708 |
| BRD1    | 18.7256854 | 20.29301 |

|         |            |          |
|---------|------------|----------|
| BRD2    | 83.8299509 | 73.68448 |
| BRD3    | 17.5446607 | 16.57679 |
| BRD4    | 21.2369102 | 22.21222 |
| BRD7    | 18.4782514 | 19.85368 |
| BRD7P   | 0          | 0        |
| BRD7P2  | 0          | 0        |
| BRD7P3  | 0          | 0        |
| BRD8    | 14.4521012 | 11.86584 |
| BRD9    | 15.4511047 | 13.24431 |
| BRDT    | 0          | 0        |
| BRE     | 4.25702994 | 3.610012 |
| BREA2   | 0          | 0        |
| BRF1    | 4.40512853 | 4.380093 |
| BRF2    | 2.80621202 | 2.415077 |
| BRI3    | 89.3106651 | 87.27369 |
| BRI3BP  | 22.595619  | 21.87591 |
| BRI3P1  | 0          | 0        |
| BRI3P2  | 0          | 0        |
| BRIP1   | 0.4515631  | 0.434465 |
| BRMS1   | 25.4879099 | 24.78267 |
| BRMS1L  | 0.73230642 | 0.619312 |
| BRP44   | 19.9162507 | 17.71948 |
| BRP44L  | 27.9973482 | 33.74206 |
| BRPF1   | 12.0913441 | 13.62482 |
| BRPF3   | 12.085289  | 15.58897 |
| BRS3    | 0.01487992 | 0        |
| BRSK1   | 0.01352981 | 0.01537  |
| BRSK2   | 0.04797566 | 0.034063 |
| BRUNOL4 | 0.01553979 | 0.011769 |
| BRUNOL5 | 0          | 0        |
| BRUNOL6 | 3.06104083 | 2.788938 |
| BRWD1   | 6.98151837 | 7.709474 |
| BRWD2   | 7.90452747 | 7.235307 |
| BRWD3   | 9.207419   | 7.631326 |
| BSCL2   | 3.8759025  | 3.823487 |
| BSDC1   | 78.6173973 | 94.04659 |
| BSG     | 97.7956987 | 119.9434 |
| BSN     | 0.02634918 | 0.028436 |
| BSND    | 0.01534696 | 0        |
| BSPH1   | 0          | 0        |
| BSPRY   | 0.05372742 | 0.04069  |
| BST1    | 0.93761611 | 0.855345 |
| BST2    | 6.51583739 | 4.731236 |
| BSX     | 0.02995061 | 0        |
| BTAF1   | 25.1198947 | 23.2303  |
| BTBD1   | 25.4077346 | 28.21863 |
| BTBD10  | 8.00605704 | 6.847446 |

|         |            |          |
|---------|------------|----------|
| BTBD11  | 2.40096403 | 2.331536 |
| BTBD12  | 3.46530205 | 4.093842 |
| BTBD16  | 0          | 0        |
| BTBD17  | 0.01252999 | 0        |
| BTBD2   | 9.8701802  | 9.460985 |
| BTBD3   | 0.36286945 | 0.383466 |
| BTBD6   | 3.74953526 | 3.978817 |
| BTBD7   | 7.96393991 | 7.485405 |
| BTBD8   | 0.01457057 | 0.049657 |
| BTBD9   | 5.12957139 | 5.065286 |
| BTC     | 0          | 0.018054 |
| BTD     | 4.37815608 | 3.689758 |
| BTF3    | 35.3676704 | 34.19261 |
| BTF3L1  | 0          | 0        |
| BTF3L2  | 0          | 0        |
| BTF3L3  | 0          | 0        |
| BTF3L4  | 13.9242384 | 13.89309 |
| BTF3L4P | 0          | 0        |
| BTF3P1  | 0          | 0        |
| BTF3P2  | 0          | 0        |
| BTG1    | 168.975374 | 123.8759 |
| BTG2    | 22.0564405 | 26.58011 |
| BTG3    | 1.78068989 | 1.363579 |
| BTG4    | 0          | 0.023909 |
| BTK     | 78.8510306 | 70.53014 |
| BTLA    | 0.08501689 | 0.074293 |
| BTN1A1  | 0.05160495 | 0.066999 |
| BTN2A1  | 42.7260661 | 34.91845 |
| BTN2A2  | 2.94295656 | 2.46556  |
| BTN2A3  | 0.60891078 | 0.474718 |
| BTN3A1  | 44.7697575 | 37.73403 |
| BTN3A2  | 32.7679673 | 27.03053 |
| BTN3A3  | 11.6465596 | 8.338252 |
| BTNL2   | 0.01536939 | 0.03492  |
| BTNL3   | 0          | 0.020038 |
| BTNL8   | 0.04828969 | 0.010972 |
| BTNL9   | 0          | 0        |
| BTRC    | 2.32889632 | 2.146187 |
| BUB1    | 0.13208375 | 0.095486 |
| BUB1B   | 0.05618742 | 0.038298 |
| BUB3    | 16.2558366 | 16.1164  |
| BUD13   | 15.1386218 | 13.53816 |
| BUD31   | 42.5143078 | 43.21304 |
| BVES    | 0.01129787 | 0.004278 |
| BXDC1   | 0.68681271 | 0.553712 |
| BXDC1P  | 0          | 0        |
| BXDC2   | 2.60958546 | 2.138965 |

|           |            |          |
|-----------|------------|----------|
| BXDC5     | 7.95236569 | 7.606954 |
| BYSL      | 0.08452394 | 0.108023 |
| BZRAP1    | 3.39400326 | 3.805971 |
| BZRPL1    | 0.54867774 | 0.398916 |
| BZW1      | 38.3986566 | 41.40199 |
| BZW1L1    | 0          | 0        |
| BZW1P1    | 0          | 0        |
| BZW2      | 1.61994737 | 1.235437 |
| C10orf10  | 0          | 0        |
| C10orf104 | 28.527327  | 27.4361  |
| C10orf105 | 0.00868815 | 0        |
| C10orf107 | 0          | 0        |
| C10orf108 | 0          | 0        |
| C10orf11  | 2.25271403 | 2.292544 |
| C10orf110 | 0          | 0        |
| C10orf111 | 0.02453364 | 0.027871 |
| C10orf112 | 0.00369189 | 0.004194 |
| C10orf113 | 0          | 0        |
| C10orf114 | 0          | 0        |
| C10orf115 | 0          | 0        |
| C10orf116 | 0          | 0        |
| C10orf118 | 10.6114782 | 10.12939 |
| C10orf119 | 17.5896898 | 18.88394 |
| C10orf12  | 5.01462239 | 4.966211 |
| C10orf120 | 0.01976065 | 0        |
| C10orf122 | 0          | 0.025906 |
| C10orf125 | 0.71179506 | 0.80861  |
| C10orf128 | 78.7354842 | 64.68884 |
| C10orf129 | 0.01227398 | 0.013943 |
| C10orf131 | 0.76878336 | 0.85304  |
| C10orf134 | 0.00806495 | 0        |
| C10orf137 | 8.30176859 | 7.49572  |
| C10orf139 | 0          | 0        |
| C10orf140 | 0.01593311 | 0.00362  |
| C10orf141 | 0          | 0        |
| C10orf18  | 4.54135215 | 4.103513 |
| C10orf2   | 0.0642084  | 0.079573 |
| C10orf25  | 0.0819701  | 0.193999 |
| C10orf26  | 31.3562488 | 30.97023 |
| C10orf27  | 0          | 0.015089 |
| C10orf28  | 12.3058374 | 10.35895 |
| C10orf32  | 4.89583682 | 4.433704 |
| C10orf35  | 0.01954027 | 0.11099  |
| C10orf4   | 2.11129365 | 1.841144 |
| C10orf40  | 0          | 0        |
| C10orf41  | 0          | 0        |
| C10orf46  | 20.9223879 | 13.55143 |



|          |            |          |
|----------|------------|----------|
| C10orf47 | 0.02523292 | 0        |
| C10orf50 | 0          | 0        |
| C10orf51 | 0          | 0        |
| C10orf53 | 0          | 0        |
| C10orf54 | 153.233    | 135.5307 |
| C10orf55 | 0.00977468 | 0.011104 |
| C10orf57 | 1.22888722 | 0.84466  |
| C10orf58 | 2.48984182 | 2.049638 |
| C10orf62 | 0          | 0        |
| C10orf67 | 0          | 0.008116 |
| C10orf68 | 0.01546549 | 0.035138 |
| C10orf71 | 0          | 0        |
| C10orf72 | 0.01045646 | 0.023757 |
| C10orf75 | 0          | 0        |
| C10orf76 | 5.31144669 | 4.880693 |
| C10orf78 | 1.4988627  | 1.562139 |
| C10orf79 | 0.00783796 | 0.004452 |
| C10orf81 | 0.00647132 | 0.007352 |
| C10orf82 | 0          | 0        |
| C10orf84 | 7.62415291 | 6.82185  |
| C10orf85 | 0          | 0        |
| C10orf88 | 2.03646711 | 1.771846 |
| C10orf90 | 0          | 0        |
| C10orf91 | 0.02848961 | 0        |
| C10orf92 | 0.01530785 | 0.008695 |
| C10orf93 | 0          | 0        |
| C10orf95 | 0.38644243 | 0.422745 |
| C10orf96 | 0.01237512 | 0        |
| C10orf97 | 7.37435819 | 6.536977 |
| C10orf99 | 0          | 0.028847 |
| C11orf1  | 0.66238339 | 0.703931 |
| C11orf10 | 41.4879402 | 43.23728 |
| C11orf16 | 0          | 0        |
| C11orf17 | 0.21067466 | 0.23933  |
| C11orf2  | 21.5111753 | 20.95419 |
| C11orf20 | 0          | 0        |
| C11orf21 | 59.9435718 | 59.94508 |
| C11orf24 | 4.47113365 | 3.931612 |
| C11orf30 | 10.7587431 | 10.34111 |
| C11orf31 | 32.6591308 | 33.24349 |
| C11orf34 | 0.01364395 | 0.046499 |
| C11orf35 | 1.54849401 | 1.747691 |
| C11orf36 | 0          | 0        |
| C11orf40 | 0          | 0        |
| C11orf41 | 0.0018063  | 0.002052 |
| C11orf42 | 0.202876   | 0.251422 |
| C11orf44 | 0          | 0        |

|          |            |          |
|----------|------------|----------|
| C11orf45 | 0          | 0        |
| C11orf46 | 1.62738437 | 1.659813 |
| C11orf48 | 16.3105598 | 14.65677 |
| C11orf49 | 0.79550306 | 0.914212 |
| C11orf51 | 11.3946805 | 9.721944 |
| C11orf52 | 0          | 0        |
| C11orf53 | 0          | 0        |
| C11orf54 | 11.9642051 | 11.51282 |
| C11orf57 | 5.75512935 | 5.497214 |
| C11orf58 | 24.3312331 | 23.603   |
| C11orf59 | 34.9831584 | 31.06406 |
| C11orf60 | 1.29457783 | 0.997948 |
| C11orf61 | 0.68037026 | 0.4616   |
| C11orf63 | 0.29662293 | 0.370004 |
| C11orf64 | 0          | 0        |
| C11orf65 | 0.02035366 | 0        |
| C11orf66 | 2.56808419 | 2.698971 |
| C11orf67 | 1.08464009 | 0.805649 |
| C11orf68 | 20.2705755 | 22.93583 |
| C11orf70 | 0.01667354 | 0.018941 |
| C11orf71 | 3.76961112 | 3.544004 |
| C11orf73 | 4.69695168 | 4.453512 |
| C11orf74 | 0.12820324 | 0.029128 |
| C11orf75 | 1.9603536  | 2.740914 |
| C11orf76 | 0          | 0        |
| C11orf79 | 25.1469219 | 25.68291 |
| C11orf80 | 0.54305633 | 0.555229 |
| C11orf82 | 0.18282896 | 0.107198 |
| C11orf83 | 3.25235588 | 3.321523 |
| C11orf84 | 40.3459054 | 56.04048 |
| C11orf85 | 0          | 0        |
| C11orf86 | 0          | 0        |
| C11orf87 | 0          | 0        |
| C11orf88 | 0.02644696 | 0        |
| C11orf9  | 0.09136865 | 0.111781 |
| C11orf90 | 0.03486788 | 0        |
| C11orf91 | 0.14500228 | 0.054908 |
| C11orf92 | 0.00772564 | 0.030718 |
| C12orf10 | 5.43370693 | 4.206925 |
| C12orf11 | 3.16510359 | 2.311462 |
| C12orf12 | 0.00709836 | 0.016128 |
| C12orf23 | 1.02973571 | 1.035092 |
| C12orf24 | 0.92616514 | 0.942213 |
| C12orf26 | 1.58621484 | 1.511716 |
| C12orf27 | 0          | 0        |
| C12orf28 | 0.00675621 | 0.007675 |
| C12orf29 | 0.88520009 | 0.689793 |

|          |            |          |
|----------|------------|----------|
| C12orf30 | 0.40006684 | 0.330533 |
| C12orf32 | 0          | 0        |
| C12orf33 | 0          | 0        |
| C12orf34 | 0.7544791  | 0.839608 |
| C12orf35 | 9.71282544 | 7.479911 |
| C12orf36 | 0          | 0        |
| C12orf39 | 0          | 0.040969 |
| C12orf4  | 0.93592728 | 0.78804  |
| C12orf40 | 0          | 0        |
| C12orf41 | 10.5875357 | 10.10639 |
| C12orf42 | 0.01438121 | 0.016337 |
| C12orf43 | 3.75608777 | 3.85645  |
| C12orf44 | 10.4029299 | 10.27209 |
| C12orf45 | 0.13521113 | 0.076801 |
| C12orf47 | 0          | 0        |
| C12orf48 | 0.3560263  | 0.254655 |
| C12orf49 | 5.20519004 | 5.009418 |
| C12orf5  | 0.21462241 | 0.165446 |
| C12orf50 | 0          | 0        |
| C12orf51 | 5.02464968 | 4.918071 |
| C12orf52 | 4.78548378 | 3.861987 |
| C12orf53 | 0.11626911 | 0.088056 |
| C12orf54 | 0          | 0        |
| C12orf55 | 0.01692861 | 0.032052 |
| C12orf56 | 0          | 0        |
| C12orf57 | 5.92426453 | 6.202211 |
| C12orf59 | 0.2638532  | 0.40251  |
| C12orf60 | 0.05596805 | 0.084774 |
| C12orf61 | 0.14982421 | 0.255304 |
| C12orf62 | 18.9262963 | 16.65201 |
| C12orf63 | 0          | 0        |
| C12orf64 | 0          | 0        |
| C12orf65 | 4.52282354 | 2.990579 |
| C12orf66 | 0.14555998 | 0.055119 |
| C12orf67 | 0          | 0        |
| C12orf68 | 0.02690955 | 0.03057  |
| C12orf69 | 0          | 0.011352 |
| C12orf70 | 0          | 0        |
| C12orf71 | 0.34824565 | 0.296709 |
| C12orf72 | 0.1412874  | 0.100315 |
| C12orf73 | 0.54611249 | 0.578093 |
| C12orf74 | 0          | 0        |
| C12orf75 | 0.13852707 | 0.139884 |
| C12orf76 | 1.53422251 | 1.227395 |
| C13orf1  | 0.32164883 | 0.357941 |
| C13orf15 | 5.25633274 | 9.14015  |
| C13orf16 | 0.38551383 | 0.067377 |

|           |            |          |
|-----------|------------|----------|
| C13orf18  | 1.9344573  | 1.302933 |
| C13orf23  | 6.50784054 | 6.402383 |
| C13orf26  | 0.02106747 | 0.023933 |
| C13orf27  | 14.6976728 | 11.95291 |
| C13orf28  | 0          | 0        |
| C13orf29  | 0          | 0        |
| C13orf3   | 0.01456048 | 0.049623 |
| C13orf30  | 0          | 0        |
| C13orf31  | 6.35380881 | 8.546145 |
| C13orf33  | 0.51023816 | 0.699564 |
| C13orf34  | 2.72957777 | 2.86828  |
| C13orf35  | 0          | 0        |
| C13orf36  | 0          | 0        |
| C13orf37  | 2.34486485 | 2.109257 |
| C13orf38  | 0          | 0        |
| C13orf39  | 0          | 0        |
| C14orf1   | 3.40580149 | 2.776975 |
| C14orf100 | 13.3821715 | 11.852   |
| C14orf101 | 5.72476765 | 4.671712 |
| C14orf102 | 24.8019398 | 20.4855  |
| C14orf104 | 2.17845987 | 2.507009 |
| C14orf105 | 0          | 0        |
| C14orf106 | 30.567495  | 31.14014 |
| C14orf109 | 7.20912596 | 9.697845 |
| C14orf115 | 0          | 0        |
| C14orf118 | 15.4743092 | 15.22379 |
| C14orf119 | 16.0651296 | 14.65066 |
| C14orf126 | 0.29016682 | 0.27618  |
| C14orf128 | 0          | 0        |
| C14orf129 | 7.64096246 | 8.495814 |
| C14orf132 | 0          | 0        |
| C14orf133 | 11.0723764 | 9.143992 |
| C14orf135 | 12.7317683 | 14.91908 |
| C14orf138 | 30.606942  | 39.38901 |
| C14orf139 | 0          | 0        |
| C14orf142 | 5.22057537 | 8.753811 |
| C14orf143 | 0.6050455  | 0.790442 |
| C14orf145 | 0.278325   | 0.251873 |
| C14orf147 | 2.04943044 | 1.809764 |
| C14orf148 | 0.43233906 | 0.581618 |
| C14orf149 | 0.6242133  | 0.34591  |
| C14orf151 | 0          | 0        |
| C14orf153 | 5.34571168 | 4.293518 |
| C14orf156 | 12.0220406 | 10.22788 |
| C14orf159 | 3.80486813 | 2.924569 |
| C14orf162 | 0          | 0        |
| C14orf165 | 0          | 0        |

|            |            |          |
|------------|------------|----------|
| C14orf166  | 19.6849911 | 17.47636 |
| C14orf166B | 0.01212534 | 0        |
| C14orf167  | 0          | 0        |
| C14orf169  | 0.00853994 | 0.029105 |
| C14orf174  | 0.13497743 | 0.082566 |
| C14orf176  | 0.02000507 | 0        |
| C14orf177  | 0.01638763 | 0        |
| C14orf178  | 0          | 0.080421 |
| C14orf179  | 2.35628709 | 2.599565 |
| C14orf180  | 0          | 0        |
| C14orf181  | 0.19479172 | 0.138304 |
| C14orf182  | 0.08610523 | 0.088924 |
| C14orf19   | 0          | 0        |
| C14orf2    | 17.2129202 | 14.52298 |
| C14orf21   | 7.44668537 | 6.545944 |
| C14orf23   | 0          | 0        |
| C14orf25   | 0          | 0        |
| C14orf28   | 1.72919962 | 1.29864  |
| C14orf33   | 0          | 0        |
| C14orf34   | 0          | 0        |
| C14orf37   | 0.32745486 | 0.906735 |
| C14orf38   | 0          | 0        |
| C14orf39   | 0          | 0.008645 |
| C14orf4    | 28.7330987 | 48.85826 |
| C14orf43   | 29.0894899 | 29.72227 |
| C14orf45   | 0.37230947 | 0.29222  |
| C14orf48   | 0          | 0        |
| C14orf49   | 2.5872392  | 2.610952 |
| C14orf50   | 0.22446973 | 0.238001 |
| C14orf53   | 0          | 0        |
| C14orf55   | 0          | 0        |
| C14orf56   | 0          | 0        |
| C14orf64   | 0          | 0        |
| C14orf68   | 0.01213233 | 0.027565 |
| C14orf70   | 0          | 0        |
| C14orf72   | 0          | 0        |
| C14orf73   | 0          | 0.009254 |
| C14orf79   | 0.41160701 | 0.328578 |
| C14orf80   | 2.07942834 | 2.049795 |
| C14orf83   | 13.1124053 | 14.41444 |
| C14orf85   | 0          | 0        |
| C14orf86   | 0          | 0        |
| C14orf93   | 4.32570334 | 3.45551  |
| C14orf99   | 0          | 0        |
| C15orf17   | 12.0880846 | 10.89296 |
| C15orf2    | 0.00261087 | 0.008898 |
| C15orf21   | 0          | 0        |

|          |            |          |
|----------|------------|----------|
| C15orf23 | 1.83053791 | 1.456839 |
| C15orf24 | 27.3488888 | 28.96126 |
| C15orf26 | 0          | 0.015165 |
| C15orf27 | 0.00876421 | 0.039825 |
| C15orf28 | 0          | 0        |
| C15orf29 | 3.31494269 | 3.486877 |
| C15orf32 | 0          | 0        |
| C15orf33 | 0.10533733 | 0.179497 |
| C15orf34 | 0          | 0        |
| C15orf37 | 2.3428803  | 2.374744 |
| C15orf38 | 0          | 0        |
| C15orf39 | 110.398423 | 109.3525 |
| C15orf40 | 2.16987401 | 2.10801  |
| C15orf41 | 0.12132744 | 0.121615 |
| C15orf42 | 0.01260889 | 0.010743 |
| C15orf43 | 0.90697506 | 0.318468 |
| C15orf44 | 2.34345691 | 2.055035 |
| C15orf48 | 0.38978258 | 0.651175 |
| C15orf49 | 0          | 0        |
| C15orf5  | 0          | 0        |
| C15orf50 | 0          | 0        |
| C15orf51 | 0          | 0        |
| C15orf52 | 0.51704869 | 0.69947  |
| C15orf53 | 0          | 0        |
| C15orf54 | 0.00682641 | 0.007755 |
| C15orf55 | 0.00554027 | 0.006294 |
| C15orf56 | 0          | 0        |
| C15orf57 | 8.26429194 | 7.621145 |
| C15orf58 | 0.66920002 | 0.954697 |
| C15orf59 | 0          | 0        |
| C15orf60 | 0          | 0.025794 |
| C15orf61 | 4.71732561 | 5.579945 |
| C15orf62 | 0          | 0        |
| C16orf10 | 0          | 0        |
| C16orf11 | 0          | 0        |
| C16orf13 | 2.80337746 | 2.672857 |
| C16orf14 | 19.8931978 | 26.03739 |
| C16orf3  | 0          | 0.024029 |
| C16orf35 | 0.5697731  | 0.599325 |
| C16orf38 | 0          | 0.016797 |
| C16orf42 | 11.7001426 | 9.34376  |
| C16orf45 | 1.56208693 | 1.927534 |
| C16orf46 | 0.14168013 | 0.160951 |
| C16orf48 | 1.18933927 | 1.226868 |
| C16orf5  | 19.8674809 | 21.48963 |
| C16orf52 | 0          | 0        |
| C16orf53 | 6.70062181 | 6.456785 |

|           |            |          |
|-----------|------------|----------|
| C16orf54  | 68.9433389 | 71.05774 |
| C16orf55  | 0.32642066 | 0.370819 |
| C16orf57  | 16.4452788 | 18.69269 |
| C16orf58  | 4.41836665 | 4.197202 |
| C16orf59  | 0.01291482 | 0.014671 |
| C16orf61  | 7.83409592 | 7.689042 |
| C16orf62  | 2.789558   | 2.327957 |
| C16orf63  | 2.50435053 | 1.645419 |
| C16orf65  | 0.04090531 | 0.092938 |
| C16orf67  | 0          | 0        |
| C16orf68  | 6.45491052 | 5.963671 |
| C16orf7   | 14.9525362 | 18.69798 |
| C16orf70  | 5.28408529 | 5.380665 |
| C16orf71  | 0.00776989 | 0.07944  |
| C16orf72  | 17.7227846 | 15.60726 |
| C16orf73  | 0.02451934 | 0        |
| C16orf74  | 2.99692913 | 4.282297 |
| C16orf75  | 0.2349199  | 0.266873 |
| C16orf78  | 0          | 0        |
| C16orf79  | 11.8199959 | 10.26102 |
| C16orf80  | 7.90890932 | 7.265362 |
| C16orf81  | 0          | 0        |
| C16orf82  | 0          | 0        |
| C16orf84  | 1.71263528 | 2.718294 |
| C16orf86  | 1.11008446 | 1.110498 |
| C16orf87  | 2.81249908 | 2.832363 |
| C16orf88  | 0.28033775 | 0.159234 |
| C16orf89  | 0.02246296 | 0        |
| C16orf90  | 0.02325811 | 0.079265 |
| C16orf91  | 1.09936371 | 0.981274 |
| C16orf92  | 0          | 0        |
| C16orf93  | 15.0131669 | 19.34054 |
| C17orf100 | 0.36413338 | 0.19917  |
| C17orf101 | 1.03093819 | 0.824762 |
| C17orf102 | 0          | 0        |
| C17orf103 | 10.9387953 | 10.23576 |
| C17orf28  | 0.01887373 | 0.007147 |
| C17orf37  | 19.3243426 | 16.97934 |
| C17orf39  | 4.53594687 | 4.232947 |
| C17orf42  | 2.79500292 | 2.586513 |
| C17orf44  | 0          | 0        |
| C17orf45  | 91.8668353 | 94.26935 |
| C17orf46  | 0.03274974 | 0.037204 |
| C17orf47  | 0.02024587 | 0        |
| C17orf48  | 6.67602735 | 5.475638 |
| C17orf49  | 24.5295528 | 24.10175 |
| C17orf50  | 0          | 0.023167 |

|          |            |          |
|----------|------------|----------|
| C17orf51 | 0.02344615 | 0.026635 |
| C17orf53 | 0.14945054 | 0.223392 |
| C17orf54 | 0          | 0        |
| C17orf55 | 0.24069402 | 0.313643 |
| C17orf56 | 32.6645204 | 32.41323 |
| C17orf57 | 0.22998963 | 0.255196 |
| C17orf58 | 0.82004168 | 0.626144 |
| C17orf59 | 11.9846583 | 13.09064 |
| C17orf60 | 0.99488948 | 1.469273 |
| C17orf61 | 2.06498786 | 2.505804 |
| C17orf62 | 61.3501801 | 61.29242 |
| C17orf63 | 4.89939807 | 5.110514 |
| C17orf64 | 0          | 0        |
| C17orf65 | 4.41606641 | 4.178834 |
| C17orf66 | 0          | 0.012131 |
| C17orf67 | 0          | 0        |
| C17orf68 | 11.9129668 | 10.7098  |
| C17orf69 | 0          | 0        |
| C17orf70 | 2.6192805  | 2.652521 |
| C17orf71 | 6.21232222 | 5.287487 |
| C17orf72 | 0          | 0        |
| C17orf73 | 0          | 0        |
| C17orf74 | 0.01274262 | 0        |
| C17orf75 | 1.46387086 | 0.868282 |
| C17orf76 | 0.6341572  | 0.728989 |
| C17orf77 | 0          | 0        |
| C17orf78 | 0          | 0        |
| C17orf79 | 0.42634076 | 0.866696 |
| C17orf80 | 3.44641455 | 3.027073 |
| C17orf81 | 5.01563717 | 4.614524 |
| C17orf82 | 0          | 0.015611 |
| C17orf85 | 21.6122904 | 20.31209 |
| C17orf86 | 0          | 0        |
| C17orf87 | 0.03156957 | 0.071727 |
| C17orf88 | 0          | 0        |
| C17orf89 | 3.60434245 | 3.198899 |
| C17orf90 | 9.42748711 | 8.167166 |
| C17orf91 | 8.36095032 | 7.071249 |
| C17orf93 | 0          | 0        |
| C17orf95 | 18.99741   | 22.73323 |
| C17orf96 | 0.01301072 | 0.01478  |
| C17orf97 | 0.44478973 | 0.163877 |
| C17orf98 | 0.03714723 | 0        |
| C17orf99 | 0.04161784 | 0.018911 |
| C18orf1  | 0.15071922 | 0.214024 |
| C18orf10 | 5.58978533 | 6.165019 |
| C18orf12 | 0          | 0        |



|            |            |          |
|------------|------------|----------|
| C18orf16   | 0          | 0        |
| C18orf18   | 0          | 0        |
| C18orf19   | 0.80571524 | 0.719168 |
| C18orf2    | 0          | 0        |
| C18orf20   | 0          | 0        |
| C18orf21   | 12.8701737 | 13.2644  |
| C18orf22   | 0.1942639  | 0.169759 |
| C18orf24   | 0.10808087 | 0.081854 |
| C18orf25   | 19.4171721 | 17.04081 |
| C18orf26   | 0.02074527 | 0        |
| C18orf32   | 53.327546  | 50.56528 |
| C18orf34   | 0          | 0        |
| C18orf45   | 0.40028185 | 0.311129 |
| C18orf51   | 0          | 0.011697 |
| C18orf54   | 0.47299669 | 0.608659 |
| C18orf55   | 2.20670032 | 2.320001 |
| C18orf56   | 0          | 0        |
| C18orf58   | 0          | 0        |
| C18orf62   | 0          | 0        |
| C18orf8    | 24.9536717 | 22.93982 |
| C19orf10   | 12.0030434 | 13.97654 |
| C19orf12   | 0.69170859 | 0.66224  |
| C19orf15   | 0.27100319 | 0.275795 |
| C19orf18   | 0.16084953 | 0.208832 |
| C19orf2    | 8.28829991 | 7.769476 |
| C19orf20   | 1.73638281 | 1.608064 |
| C19orf21   | 0.00737472 | 0        |
| C19orf22   | 194.132727 | 238.7983 |
| C19orf23   | 0          | 0        |
| C19orf24   | 6.29585329 | 6.992066 |
| C19orf25   | 7.49906576 | 7.270301 |
| C19orf26   | 0.01640041 | 0.018631 |
| C19orf28   | 96.5464097 | 93.5825  |
| C19orf29   | 4.79087541 | 4.104944 |
| C19orf29OS | 0          | 0        |
| C19orf30   | 0          | 0        |
| C19orf33   | 0.27364856 | 0.310869 |
| C19orf34   | 0          | 0        |
| C19orf35   | 13.719642  | 13.68979 |
| C19orf36   | 1.67788355 | 1.835506 |
| C19orf38   | 20.3302787 | 19.60816 |
| C19orf39   | 0.55662729 | 0.77605  |
| C19orf40   | 1.40533896 | 1.161082 |
| C19orf41   | 0          | 0        |
| C19orf42   | 10.0149792 | 7.532595 |
| C19orf43   | 81.7215336 | 74.93625 |
| C19orf44   | 0.02513488 | 0.057107 |

|           |            |          |
|-----------|------------|----------|
| C19orf45  | 4.43297627 | 4.239287 |
| C19orf46  | 0.35474277 | 0.325495 |
| C19orf47  | 9.85006098 | 11.5381  |
| C19orf48  | 0.87027465 | 1.03163  |
| C19orf50  | 23.7941598 | 23.43096 |
| C19orf51  | 0.02909409 | 0.044068 |
| C19orf52  | 6.74255424 | 7.625454 |
| C19orf53  | 17.3054647 | 17.87446 |
| C19orf54  | 1.73365424 | 1.405517 |
| C19orf55  | 4.25011348 | 4.639073 |
| C19orf56  | 19.9264461 | 18.58655 |
| C19orf57  | 0.06950523 | 0.069089 |
| C19orf59  | 1.18950649 | 3.341724 |
| C19orf6   | 73.9613378 | 74.85706 |
| C19orf60  | 7.95617638 | 6.541263 |
| C19orf61  | 2.60917834 | 2.009882 |
| C19orf62  | 20.039995  | 16.72451 |
| C19orf63  | 17.7588587 | 16.53404 |
| C19orf66  | 14.1455734 | 14.21411 |
| C19orf67  | 0          | 0.021576 |
| C19orf68  | 1.48884036 | 1.375078 |
| C19orf69  | 0.13335305 | 0.100994 |
| C19orf70  | 1.91564127 | 1.698497 |
| C19orf71  | 0.81469241 | 1.067889 |
| C19orf72  | 45.225878  | 55.98932 |
| C19orf73  | 0          | 0        |
| C1D       | 14.4930202 | 12.3878  |
| C1GALT1   | 12.9536869 | 11.91791 |
| C1GALT1C1 | 3.55760497 | 3.118839 |
| C1orf100  | 0.03631318 | 0.082505 |
| C1orf101  | 0.12507241 | 0.142084 |
| C1orf102  | 0.05060248 | 0.071857 |
| C1orf103  | 2.90004565 | 3.430575 |
| C1orf104  | 0.01609903 | 0.018289 |
| C1orf105  | 0.04290884 | 0.048745 |
| C1orf106  | 1.71260174 | 7.562336 |
| C1orf107  | 0.44222012 | 0.389477 |
| C1orf109  | 1.20527375 | 1.095368 |
| C1orf110  | 0          | 0        |
| C1orf111  | 0          | 0        |
| C1orf112  | 1.37543051 | 1.093758 |
| C1orf113  | 0.60129011 | 0.57048  |
| C1orf114  | 0.16901391 | 0.140802 |
| C1orf115  | 0.0495213  | 0.016073 |
| C1orf116  | 0.03439258 | 0.052094 |
| C1orf118  | 0          | 0        |
| C1orf120  | 0          | 0        |

|          |            |          |
|----------|------------|----------|
| C1orf122 | 4.16358982 | 4.421826 |
| C1orf123 | 6.64671753 | 5.965774 |
| C1orf124 | 2.82675111 | 2.725815 |
| C1orf125 | 0          | 0        |
| C1orf126 | 0          | 0        |
| C1orf127 | 0          | 0        |
| C1orf128 | 17.1624773 | 16.56643 |
| C1orf129 | 0          | 0        |
| C1orf130 | 0          | 0        |
| C1orf131 | 7.51637267 | 6.624581 |
| C1orf132 | 0          | 0        |
| C1orf133 | 0          | 0        |
| C1orf135 | 0.39785925 | 0.359262 |
| C1orf138 | 0          | 0        |
| C1orf14  | 0          | 0.010099 |
| C1orf141 | 0          | 0        |
| C1orf144 | 42.3341625 | 42.59095 |
| C1orf146 | 0          | 0.095413 |
| C1orf147 | 0          | 0        |
| C1orf149 | 16.7948033 | 17.24356 |
| C1orf150 | 0.0160132  | 0.054574 |
| C1orf151 | 6.76481294 | 6.208837 |
| C1orf152 | 0          | 0        |
| C1orf156 | 4.81618308 | 4.595198 |
| C1orf157 | 0          | 0        |
| C1orf158 | 0          | 0        |
| C1orf159 | 2.21845222 | 2.236391 |
| C1orf161 | 0.02604563 | 0.029588 |
| C1orf162 | 296.188904 | 255.7296 |
| C1orf163 | 1.4980874  | 2.885747 |
| C1orf167 | 0.01641322 | 0        |
| C1orf168 | 0.00607669 | 0        |
| C1orf170 | 0          | 0        |
| C1orf172 | 0.0117789  | 0        |
| C1orf173 | 0.00293691 | 0.006673 |
| C1orf174 | 33.2922107 | 33.40474 |
| C1orf175 | 3.75812773 | 3.59778  |
| C1orf177 | 0.03525768 | 0        |
| C1orf182 | 0          | 0        |
| C1orf183 | 8.23617861 | 8.529676 |
| C1orf185 | 0          | 0        |
| C1orf186 | 0.42946946 | 0.509096 |
| C1orf187 | 0.01185862 | 0.013472 |
| C1orf189 | 0.05432902 | 0.185156 |
| C1orf190 | 0          | 0.012918 |
| C1orf192 | 2.96093162 | 2.808198 |
| C1orf194 | 0.05752485 | 0.032675 |

|          |            |          |
|----------|------------|----------|
| C1orf198 | 0.14756404 | 0.173416 |
| C1orf199 | 0          | 0        |
| C1orf2   | 4.42916063 | 3.414298 |
| C1orf200 | 0          | 0        |
| C1orf201 | 0.05884739 | 0.085952 |
| C1orf203 | 0          | 0        |
| C1orf204 | 0.1933557  | 0.315157 |
| C1orf21  | 0.02855594 | 0.039391 |
| C1orf210 | 0          | 0        |
| C1orf211 | 0          | 0        |
| C1orf212 | 11.0865373 | 10.16629 |
| C1orf213 | 0.44051652 | 0.559807 |
| C1orf216 | 0.55895563 | 0.496589 |
| C1orf220 | 0.07342956 | 0.083417 |
| C1orf222 | 0.00762893 | 0.008667 |
| C1orf223 | 0          | 0        |
| C1orf226 | 0.00988962 | 0.011235 |
| C1orf227 | 0          | 0.047204 |
| C1orf228 | 38.7814413 | 43.57438 |
| C1orf229 | 0          | 0.010578 |
| C1orf230 | 0.04620952 | 0        |
| C1orf25  | 5.25156293 | 4.936328 |
| C1orf26  | 1.74278409 | 1.416759 |
| C1orf27  | 3.51348735 | 3.511402 |
| C1orf31  | 1.80404556 | 1.9749   |
| C1orf35  | 8.34493756 | 6.406394 |
| C1orf38  | 145.741139 | 143.9773 |
| C1orf43  | 40.9982876 | 41.89332 |
| C1orf49  | 0          | 0        |
| C1orf50  | 6.6374084  | 6.369363 |
| C1orf51  | 0          | 0        |
| C1orf52  | 6.65415652 | 6.066408 |
| C1orf53  | 0.07151473 | 0        |
| C1orf54  | 1.37665857 | 0.758257 |
| C1orf55  | 5.97352257 | 7.369888 |
| C1orf56  | 0.66568267 | 0.628249 |
| C1orf57  | 4.28898104 | 3.548342 |
| C1orf58  | 22.910619  | 19.99881 |
| C1orf59  | 12.5266058 | 12.41651 |
| C1orf61  | 0          | 0        |
| C1orf62  | 0          | 0.007831 |
| C1orf63  | 99.816503  | 102.6652 |
| C1orf64  | 0.04585677 | 0.026047 |
| C1orf65  | 0          | 0        |
| C1orf66  | 8.75669359 | 8.126622 |
| C1orf68  | 0.02315565 | 0        |
| C1orf69  | 0.46019512 | 0.3173   |

|                 |            |          |
|-----------------|------------|----------|
| C1orf70         | 0.07529214 | 0.06415  |
| C1orf71         | 6.74896497 | 6.439192 |
| C1orf74         | 0.63304968 | 0.703853 |
| C1orf77         | 36.1642197 | 31.7175  |
| C1orf81         | 0          | 0        |
| C1orf83         | 5.68099619 | 5.561727 |
| C1orf84         | 1.04418731 | 1.105792 |
| C1orf85         | 2.90507727 | 1.98917  |
| C1orf86         | 32.3732493 | 39.42679 |
| C1orf87         | 0.01044997 | 0        |
| C1orf88         | 0.0089622  | 0.010181 |
| C1orf89         | 0.44131129 | 0.483432 |
| C1orf9          | 9.71515293 | 10.53817 |
| C1orf91         | 6.31537205 | 5.96024  |
| C1orf92         | 0          | 0.012118 |
| C1orf93         | 1.74628995 | 1.534149 |
| C1orf94         | 0          | 0        |
| C1orf95         | 0.0102738  | 0.005836 |
| C1orf96         | 13.3148112 | 13.05029 |
| C1orf97         | 0          | 0        |
| C1QA            | 0          | 0        |
| C1QB            | 0          | 0        |
| C1QBP           | 3.57954904 | 4.045887 |
| C1QBPP          | 0          | 0        |
| C1QC            | 0          | 0        |
| C1QL1           | 0          | 0        |
| C1QL2           | 0          | 0        |
| C1QL3           | 0.19397618 | 0.134132 |
| C1QL4           | 0.01018176 | 0        |
| C1QTNF1         | 0          | 0        |
| C1QTNF2         | 0          | 0        |
| C1QTNF3         | 0.62429403 | 0.588896 |
| C1QTNF4         | 0.34199619 | 0.320946 |
| C1QTNF5         | 0          | 0        |
| C1QTNF6         | 0.27928743 | 0.187111 |
| C1QTNF7         | 0.00434497 | 0        |
| C1QTNF8         | 0          | 0        |
| C1QTNF9         | 0          | 0        |
| C1R (NC_000012) | 0.82663694 | 0.898243 |
| C1R (NC_000012) | 0.63190885 | 0.630845 |
| C1RL            | 14.378082  | 10.79797 |
| C1S             | 0.09853255 | 0.094714 |
| C2              | 0.02417631 | 0.009155 |
| C20orf103       | 0.01183859 | 0.026898 |
| C20orf106       | 1.48851901 | 2.254642 |
| C20orf107       | 1.78745609 | 0.791581 |
| C20orf108       | 10.623544  | 9.730387 |

|           |            |          |
|-----------|------------|----------|
| C20orf11  | 13.9868082 | 12.96497 |
| C20orf111 | 24.9040498 | 25.25258 |
| C20orf112 | 8.14895243 | 19.73986 |
| C20orf114 | 0          | 0.01383  |
| C20orf117 | 0.41937318 | 0.379844 |
| C20orf118 | 0.24723564 | 0.070216 |
| C20orf12  | 0.42050662 | 0.477702 |
| C20orf123 | 0          | 0        |
| C20orf132 | 0.04034466 | 0.019642 |
| C20orf134 | 0          | 0        |
| C20orf135 | 1.88233537 | 1.761796 |
| C20orf141 | 0          | 0        |
| C20orf144 | 0          | 0        |
| C20orf149 | 48.5990919 | 49.52241 |
| C20orf151 | 0.01505573 | 0        |
| C20orf152 | 0.05455457 | 0.012395 |
| C20orf160 | 0.0581269  | 0.0566   |
| C20orf165 | 0.61409172 | 0.730838 |
| C20orf166 | 0.01723388 | 0        |
| C20orf173 | 0          | 0        |
| C20orf177 | 12.8758067 | 14.4954  |
| C20orf181 | 0          | 0        |
| C20orf185 | 0          | 0        |
| C20orf186 | 0          | 0        |
| C20orf189 | 0          | 0        |
| C20orf191 | 0          | 0        |
| C20orf194 | 0.0644102  | 0.041812 |
| C20orf195 | 0.22689206 | 0.36515  |
| C20orf196 | 2.62361149 | 2.814883 |
| C20orf197 | 5.06393403 | 6.014991 |
| C20orf199 | 0          | 0        |
| C20orf20  | 11.1038423 | 10.46798 |
| C20orf200 | 0.03253436 | 0        |
| C20orf201 | 0          | 0        |
| C20orf24  | 81.9095689 | 76.50286 |
| C20orf26  | 0.00515074 | 0        |
| C20orf27  | 0.21392052 | 0.243017 |
| C20orf29  | 2.82327042 | 2.268564 |
| C20orf3   | 94.874321  | 82.75368 |
| C20orf30  | 14.3487635 | 12.24195 |
| C20orf39  | 0.02588264 | 0.009801 |
| C20orf4   | 6.35446346 | 7.020255 |
| C20orf43  | 94.8498708 | 91.83238 |
| C20orf46  | 0.01222403 | 0.097207 |
| C20orf54  | 0          | 0        |
| C20orf56  | 0          | 0        |
| C20orf7   | 5.00512838 | 4.135204 |

|           |            |          |
|-----------|------------|----------|
| C20orf70  | 0          | 0        |
| C20orf71  | 0          | 0        |
| C20orf72  | 12.2829074 | 9.178803 |
| C20orf74  | 16.6343242 | 13.61607 |
| C20orf79  | 0          | 0        |
| C20orf85  | 0          | 0        |
| C20orf94  | 0.28392416 | 0.339518 |
| C20orf95  | 0          | 0        |
| C20orf96  | 0.14873224 | 0.168962 |
| C21orf109 | 0          | 0        |
| C21orf110 | 0          | 0        |
| C21orf119 | 0          | 0        |
| C21orf121 | 0          | 0        |
| C21orf122 | 0          | 0        |
| C21orf125 | 0          | 0        |
| C21orf126 | 0          | 0        |
| C21orf128 | 0          | 0        |
| C21orf129 | 0          | 0        |
| C21orf130 | 0          | 0        |
| C21orf131 | 0          | 0        |
| C21orf136 | 0          | 0        |
| C21orf15  | 0          | 0        |
| C21orf19  | 0          | 0        |
| C21orf2   | 1.45943856 | 1.679338 |
| C21orf29  | 0.01060012 | 0.006021 |
| C21orf33  | 14.0757465 | 13.52582 |
| C21orf34  | 0          | 0        |
| C21orf41  | 0          | 0        |
| C21orf45  | 2.10119476 | 1.505172 |
| C21orf49  | 0          | 0        |
| C21orf54  | 0          | 0        |
| C21orf56  | 1.57962331 | 1.320075 |
| C21orf57  | 0.84808058 | 0.722575 |
| C21orf58  | 0.1062601  | 0.03219  |
| C21orf59  | 7.21263703 | 6.195761 |
| C21orf62  | 0.04733066 | 0.047794 |
| C21orf63  | 0.19578684 | 0.259486 |
| C21orf66  | 26.253555  | 21.54495 |
| C21orf67  | 0          | 0        |
| C21orf7   | 0.252683   | 0.299012 |
| C21orf70  | 4.05710132 | 3.632922 |
| C21orf71  | 0          | 0        |
| C21orf81  | 0          | 0        |
| C21orf82  | 0          | 0        |
| C21orf84  | 0          | 0        |
| C21orf86  | 0          | 0        |
| C21orf87  | 0          | 0        |

|            |             |          |
|------------|-------------|----------|
| C21orf88   | 0           | 0        |
| C21orf89   | 0           | 0        |
| C21orf90   | 0           | 0        |
| C21orf91   | 13.3396495  | 13.59776 |
| C21orf93   | 0           | 0        |
| C21orf94   | 0           | 0        |
| C21orf96   | 0           | 0        |
| C21orf99   | 0           | 0        |
| C22orf13   | 28.3057963  | 24.46783 |
| C22orf15   | 0.02433487  | 0        |
| C22orf23   | 1.77906647  | 2.281334 |
| C22orf24   | 0           | 0        |
| C22orf25   | 32.3666037  | 30.96335 |
| C22orf26   | 0.30919604  | 0.104075 |
| C22orf27   | 0           | 0        |
| C22orf28   | 12.5480315  | 11.43387 |
| C22orf29   | 0.16794914  | 0.205192 |
| C22orf30   | 21.4252957  | 20.37811 |
| C22orf31   | 0.01964984  | 0        |
| C22orf32   | 3.68983153  | 3.642975 |
| C22orf33   | 0           | 0        |
| C22orf34   | 0           | 0        |
| C22orf36   | 0.11869138  | 0.115573 |
| C22orf37   | 0           | 0        |
| C22orf39   | 7.50781679  | 6.885797 |
| C22orf40   | 1.49375676  | 1.232677 |
| C22orf41   | 0.04756862  | 0        |
| C22orf42   | 0           | 0        |
| C22orf43   | 0.39453318  | 0.466871 |
| C22orf9    | 19.73111116 | 20.93344 |
| C2CD2      | 0.02276173  | 0.011082 |
| C2CD2L     | 27.7089215  | 33.67058 |
| C2CD3      | 4.3777671   | 3.809755 |
| C2orf14    | 0           | 0        |
| C2orf15    | 0.05881211  | 0        |
| C2orf16    | 0.04407826  | 0.015407 |
| C2orf18    | 2.4615546   | 2.069799 |
| C2orf21    | 0.10021868  | 0.053026 |
| C2orf24    | 16.6154858  | 17.07889 |
| C2orf27A   | 0           | 0        |
| C2orf27AP1 | 0           | 0        |
| C2orf27B   | 0           | 0        |
| C2orf28    | 18.4836422  | 14.72744 |
| C2orf29    | 13.0594192  | 12.23661 |
| C2orf3     | 0.43794325  | 0.340887 |
| C2orf30    | 11.4995963  | 12.57393 |
| C2orf34    | 0.28430905  | 0.35374  |



|         |            |          |
|---------|------------|----------|
| C2orf37 | 1.30995518 | 1.175498 |
| C2orf39 | 0.00844052 | 0.009589 |
| C2orf40 | 0.02681802 | 0.030466 |
| C2orf42 | 1.50775947 | 1.315384 |
| C2orf43 | 0.09570354 | 0.091994 |
| C2orf44 | 1.05288637 | 0.736059 |
| C2orf47 | 3.04755462 | 3.319141 |
| C2orf48 | 0          | 0.025116 |
| C2orf49 | 8.43857703 | 8.239959 |
| C2orf50 | 0.01991035 | 0        |
| C2orf51 | 0          | 0        |
| C2orf52 | 0          | 0        |
| C2orf53 | 0          | 0        |
| C2orf54 | 0          | 0        |
| C2orf55 | 1.98352179 | 2.845964 |
| C2orf56 | 6.83727407 | 6.460106 |
| C2orf57 | 0          | 0        |
| C2orf58 | 0          | 0        |
| C2orf60 | 4.13459022 | 3.202473 |
| C2orf61 | 0.11292902 | 0.069976 |
| C2orf62 | 1.84349085 | 3.646857 |
| C2orf63 | 1.42702357 | 1.541827 |
| C2orf64 | 9.88013446 | 9.901829 |
| C2orf65 | 0.11575094 | 0.07514  |
| C2orf66 | 0          | 0        |
| C2orf67 | 6.04721164 | 5.885185 |
| C2orf68 | 20.497849  | 19.90892 |
| C2orf69 | 5.89363489 | 5.279327 |
| C2orf7  | 1.78608536 | 2.029021 |
| C2orf70 | 0          | 0        |
| C2orf71 | 0          | 0.003391 |
| C2orf72 | 0          | 0.00667  |
| C2orf73 | 0          | 0        |
| C2orf74 | 4.58851997 | 4.233734 |
| C2orf76 | 0.77461746 | 0.804551 |
| C2orf77 | 0.10662916 | 0.187205 |
| C2orf78 | 0          | 0        |
| C2orf79 | 1.9481513  | 1.419744 |
| C2orf80 | 0          | 0        |
| C2orf81 | 0.00943263 | 0.032147 |
| C2orf82 | 0.76866801 | 0.410927 |
| C2orf83 | 0.02280405 | 0.025906 |
| C2orf84 | 0.04740774 | 0.094248 |
| C2orf85 | 0          | 0.026569 |
| C2orf86 | 0.64293867 | 0.596952 |
| C2orf88 | 0.11319818 | 0.173324 |
| C3      | 0.5770528  | 1.264258 |

|         |            |          |
|---------|------------|----------|
| C3AR1   | 135.906449 | 76.21244 |
| C3orf1  | 11.2899177 | 10.74531 |
| C3orf10 | 48.4512304 | 57.53955 |
| C3orf14 | 0.21901386 | 0.124402 |
| C3orf15 | 0          | 0.005388 |
| C3orf16 | 0.0169833  | 0        |
| C3orf17 | 7.73797924 | 7.227936 |
| C3orf18 | 0.18214034 | 0.224907 |
| C3orf19 | 16.6142734 | 15.28324 |
| C3orf20 | 0.1411096  | 0.138443 |
| C3orf21 | 3.48490418 | 7.47891  |
| C3orf22 | 0          | 0        |
| C3orf23 | 1.33738168 | 1.178757 |
| C3orf24 | 0.04147008 | 0.023555 |
| C3orf25 | 0.20498234 | 0.232863 |
| C3orf26 | 1.77258633 | 1.714624 |
| C3orf27 | 0.00779582 | 0.008856 |
| C3orf30 | 0          | 0        |
| C3orf31 | 0.80543965 | 0.838743 |
| C3orf32 | 0.01360863 | 0.01546  |
| C3orf33 | 0.14154806 | 0.074216 |
| C3orf34 | 5.23686484 | 4.268358 |
| C3orf35 | 0.6326666  | 0.659646 |
| C3orf36 | 0          | 0.01432  |
| C3orf37 | 21.059261  | 21.01992 |
| C3orf38 | 8.75389255 | 8.809337 |
| C3orf39 | 1.36689504 | 1.326951 |
| C3orf42 | 0          | 0        |
| C3orf43 | 0.03484861 | 0.026392 |
| C3orf44 | 0.02048254 | 0.034903 |
| C3orf45 | 0.17594419 | 0.199875 |
| C3orf46 | 0          | 0        |
| C3orf47 | 0          | 0        |
| C3orf48 | 0          | 0        |
| C3orf49 | 0          | 0        |
| C3orf50 | 0          | 0        |
| C3orf51 | 0          | 0        |
| C3orf52 | 0.00922973 | 0        |
| C3orf53 | 0          | 0        |
| C3orf54 | 2.24404975 | 2.52631  |
| C3orf55 | 0          | 0        |
| C3orf56 | 0          | 0        |
| C3orf57 | 0          | 0        |
| C3orf58 | 8.66098981 | 6.65122  |
| C3orf59 | 0          | 0        |
| C3orf62 | 5.45253012 | 5.402426 |
| C3orf63 | 8.50363158 | 8.050671 |

|         |            |          |
|---------|------------|----------|
| C3orf64 | 1.53447316 | 1.714325 |
| C3orf65 | 0          | 0        |
| C3orf66 | 0          | 0        |
| C3orf67 | 0          | 0.028089 |
| C3orf70 | 0.14964648 | 0.250954 |
| C3orf71 | 0.72365031 | 0.373672 |
| C3orf72 | 0.00515959 | 0.005861 |
| C3orf74 | 0          | 0        |
| C3orf75 | 2.11967755 | 1.522698 |
| C3orf76 | 0          | 0        |
| C3P1    | 0          | 0        |
| C4A     | 0.30999382 | 0.303736 |
| C4B     | 0.17433939 | 0.145238 |
| C4BPA   | 0          | 0        |
| C4BPAL1 | 0          | 0        |
| C4BPAL2 | 0          | 0        |
| C4BPB   | 0.03515942 | 0.019971 |
| C4orf10 | 0          | 0        |
| C4orf11 | 0          | 0        |
| C4orf12 | 0          | 0        |
| C4orf14 | 5.7375463  | 6.24461  |
| C4orf16 | 0.85315992 | 0.804931 |
| C4orf17 | 0          | 0        |
| C4orf18 | 0          | 0        |
| C4orf19 | 0.20504408 | 0.132205 |
| C4orf21 | 0.64266819 | 0.522509 |
| C4orf22 | 0          | 0        |
| C4orf23 | 0.85191779 | 0.864561 |
| C4orf26 | 0.02978092 | 0        |
| C4orf27 | 2.88752489 | 2.573149 |
| C4orf29 | 4.57778797 | 4.483886 |
| C4orf3  | 15.5745935 | 15.13537 |
| C4orf30 | 6.47217752 | 5.903004 |
| C4orf31 | 0.0146467  | 0.016639 |
| C4orf32 | 1.36518106 | 1.656011 |
| C4orf33 | 16.4611902 | 10.08728 |
| C4orf34 | 3.30507016 | 3.162539 |
| C4orf35 | 0          | 0.01547  |
| C4orf36 | 0.06946695 | 0        |
| C4orf37 | 0.02548525 | 0.028952 |
| C4orf38 | 0          | 0        |
| C4orf39 | 0          | 0        |
| C4orf40 | 0.00438302 | 0        |
| C4orf41 | 14.3033571 | 13.54686 |
| C4orf42 | 0.76690756 | 0.685229 |
| C4orf43 | 0.18635591 | 0.211703 |
| C4orf44 | 0.1217897  | 0.16351  |

|         |            |          |
|---------|------------|----------|
| C4orf45 | 0          | 0        |
| C4orf46 | 1.06170466 | 1.029939 |
| C4orf47 | 0          | 0        |
| C4orf48 | 28.8192036 | 25.06907 |
| C4orf49 | 0.14132037 | 0.08919  |
| C4orf50 | 0.0066159  | 0        |
| C4orf6  | 0          | 0        |
| C4orf7  | 0          | 0        |
| C4orf8  | 12.1807432 | 11.89966 |
| C5      | 0.09233448 | 0.087411 |
| C5AR1   | 60.8226376 | 48.82067 |
| C5orf13 | 0.17891273 | 0.175214 |
| C5orf15 | 9.42038064 | 9.392785 |
| C5orf20 | 0.00670664 | 0        |
| C5orf22 | 6.26335994 | 6.315138 |
| C5orf23 | 0.01462632 | 0.008308 |
| C5orf24 | 7.8931898  | 7.69843  |
| C5orf25 | 5.70541748 | 7.803242 |
| C5orf26 | 0          | 0        |
| C5orf27 | 0          | 0        |
| C5orf28 | 1.08134625 | 0.865089 |
| C5orf30 | 0.87314497 | 0.690367 |
| C5orf32 | 8.89533233 | 9.29157  |
| C5orf33 | 3.41888309 | 2.623605 |
| C5orf34 | 0.40499613 | 0.401348 |
| C5orf35 | 0.85128268 | 0.660064 |
| C5orf36 | 0.01778363 | 0.017316 |
| C5orf37 | 4.76399114 | 4.868642 |
| C5orf38 | 0          | 0        |
| C5orf39 | 2.14239154 | 3.773319 |
| C5orf4  | 0.05413319 | 0.086095 |
| C5orf40 | 0          | 0        |
| C5orf41 | 18.3575925 | 16.42485 |
| C5orf42 | 0.47575385 | 0.415959 |
| C5orf43 | 2.56814596 | 3.305897 |
| C5orf44 | 4.17389748 | 3.764041 |
| C5orf45 | 2.13579548 | 1.948993 |
| C5orf46 | 0          | 0.044068 |
| C5orf47 | 0.05002061 | 0.037883 |
| C5orf48 | 0          | 0        |
| C5orf49 | 0          | 0.02328  |
| C5orf50 | 0.0188399  | 0.08561  |
| C5orf51 | 5.12547804 | 4.413851 |
| C5orf52 | 0          | 0        |
| C5orf53 | 3.31015312 | 4.617289 |
| C5orf54 | 0.05243225 | 0.034036 |
| C5orf55 | 0.39598132 | 0.246687 |

|          |            |          |
|----------|------------|----------|
| C5orf56  | 6.75925455 | 7.053479 |
| C6       | 0.00545971 | 0        |
| C6orf1   | 24.9828352 | 20.89452 |
| C6orf10  | 0          | 0        |
| C6orf100 | 0          | 0        |
| C6orf103 | 0.00397454 | 0.004515 |
| C6orf105 | 0.02263222 | 0.025711 |
| C6orf106 | 41.1752012 | 37.74377 |
| C6orf108 | 0.07914177 | 0.089906 |
| C6orf114 | 0          | 0        |
| C6orf115 | 9.35565023 | 8.988716 |
| C6orf118 | 0          | 0        |
| C6orf120 | 2.08427666 | 1.912652 |
| C6orf122 | 0          | 0        |
| C6orf123 | 0          | 0        |
| C6orf124 | 0          | 0        |
| C6orf125 | 1.24656112 | 0.944075 |
| C6orf126 | 0.10281335 | 0        |
| C6orf127 | 0          | 0        |
| C6orf129 | 1.86214686 | 1.65388  |
| C6orf130 | 13.3960371 | 10.90496 |
| C6orf132 | 0.01241409 | 0.009402 |
| C6orf134 | 2.42338992 | 1.861034 |
| C6orf136 | 8.16779132 | 7.213966 |
| C6orf138 | 0.01633035 | 0        |
| C6orf140 | 0          | 0        |
| C6orf141 | 0          | 0        |
| C6orf142 | 0          | 0.01316  |
| C6orf145 | 0.01916621 | 0        |
| C6orf146 | 0          | 0        |
| C6orf147 | 0          | 0        |
| C6orf15  | 0          | 0        |
| C6orf150 | 4.97047225 | 6.229746 |
| C6orf153 | 16.9980458 | 15.41507 |
| C6orf154 | 0.01982587 | 0.022522 |
| C6orf155 | 0          | 0        |
| C6orf162 | 0.38871812 | 0.490655 |
| C6orf163 | 0.12947859 | 0.203663 |
| C6orf164 | 0          | 0        |
| C6orf165 | 0.00661174 | 0.007511 |
| C6orf167 | 0.25299484 | 0.207264 |
| C6orf168 | 0.00215423 | 0.004894 |
| C6orf170 | 0.21713611 | 0.232708 |
| C6orf173 | 0.11468362 | 0.043427 |
| C6orf174 | 0.00591264 | 0.040301 |
| C6orf176 | 0          | 0        |
| C6orf182 | 0.43533523 | 0.28591  |

|           |            |          |
|-----------|------------|----------|
| C6orf182P | 0          | 0        |
| C6orf185  | 0          | 0        |
| C6orf186  | 0.09548288 | 0.151858 |
| C6orf191  | 0          | 0        |
| C6orf192  | 0.03468096 | 0.039398 |
| C6orf195  | 0          | 0        |
| C6orf201  | 0.01273491 | 0.014467 |
| C6orf203  | 1.38415609 | 1.210766 |
| C6orf204  | 2.36022517 | 2.089115 |
| C6orf208  | 0          | 0        |
| C6orf211  | 3.40885032 | 2.77669  |
| C6orf217  | 0          | 0        |
| C6orf218  | 0          | 0        |
| C6orf221  | 0          | 0        |
| C6orf222  | 0.06753318 | 0.057539 |
| C6orf223  | 0.03035053 | 0.137915 |
| C6orf224  | 0.05824191 | 0        |
| C6orf225  | 0.02361512 | 0.017885 |
| C6orf226  | 4.45645602 | 4.153932 |
| C6orf227  | 0          | 0        |
| C6orf25   | 0.36250571 | 0.631445 |
| C6orf26   | 0.82722614 | 1.018054 |
| C6orf27   | 0.27418071 | 0.204917 |
| C6orf35   | 0.93916521 | 0.889089 |
| C6orf41   | 0          | 0        |
| C6orf47   | 20.0653866 | 19.27215 |
| C6orf48   | 15.1821867 | 14.52396 |
| C6orf52   | 0.20314329 | 0.192312 |
| C6orf57   | 1.16139923 | 1.137386 |
| C6orf58   | 0          | 0.019904 |
| C6orf59   | 0          | 0        |
| C6orf62   | 96.2846232 | 90.26698 |
| C6orf64   | 3.97510163 | 3.035399 |
| C6orf70   | 2.16526507 | 1.885062 |
| C6orf72   | 12.190521  | 11.3072  |
| C6orf81   | 0.05395722 | 0.081728 |
| C6orf89   | 16.1575199 | 15.01178 |
| C6orf97   | 2.49932005 | 1.831056 |
| C7        | 0          | 0        |
| C7orf10   | 0.06537727 | 0.044562 |
| C7orf11   | 7.60726637 | 7.734946 |
| C7orf13   | 0          | 0        |
| C7orf16   | 0          | 0        |
| C7orf20   | 18.5784174 | 20.87659 |
| C7orf23   | 7.51912603 | 8.931153 |
| C7orf25   | 6.10598653 | 3.97867  |
| C7orf26   | 16.277321  | 17.0055  |

|          |            |          |
|----------|------------|----------|
| C7orf27  | 10.0921589 | 11.29677 |
| C7orf28A | 14.6578567 | 13.31601 |
| C7orf28B | 17.1418987 | 18.35026 |
| C7orf29  | 0          | 0.016627 |
| C7orf30  | 5.79240906 | 5.979186 |
| C7orf31  | 2.24876081 | 2.230336 |
| C7orf33  | 0          | 0        |
| C7orf34  | 0          | 0.062201 |
| C7orf36  | 1.30180203 | 1.032417 |
| C7orf38  | 1.70801806 | 1.423616 |
| C7orf4   | 0          | 0        |
| C7orf40  | 0          | 0        |
| C7orf41  | 18.0093134 | 15.15928 |
| C7orf42  | 37.7890387 | 47.22353 |
| C7orf43  | 39.7340284 | 32.48337 |
| C7orf44  | 32.114537  | 32.66435 |
| C7orf45  | 0.018188   | 0        |
| C7orf46  | 1.15696454 | 0.795089 |
| C7orf47  | 36.2630439 | 38.70415 |
| C7orf49  | 42.6257823 | 39.01842 |
| C7orf50  | 24.2449872 | 29.16828 |
| C7orf51  | 0.02348543 | 0.01334  |
| C7orf52  | 0          | 0.008149 |
| C7orf53  | 7.48576291 | 7.0756   |
| C7orf55  | 3.97180165 | 2.90059  |
| C7orf57  | 0.12862555 | 0.06744  |
| C7orf58  | 0          | 0.00852  |
| C7orf59  | 133.29785  | 102.6826 |
| C7orf60  | 3.39754841 | 3.168927 |
| C7orf61  | 0.77483789 | 0.832648 |
| C7orf62  | 0          | 0        |
| C7orf63  | 0.01384156 | 0.007862 |
| C7orf64  | 7.54315892 | 6.468594 |
| C7orf65  | 0          | 0        |
| C7orf66  | 0          | 0        |
| C7orf67  | 0          | 0        |
| C7orf68  | 3.29079189 | 0.693548 |
| C7orf69  | 0          | 0        |
| C7orf70  | 7.46427739 | 10.11935 |
| C8A      | 0          | 0        |
| C8B      | 0.13418228 | 0.058628 |
| C8G      | 0.52743134 | 0.49023  |
| C8orf12  | 0          | 0        |
| C8orf22  | 0          | 0        |
| C8orf30A | 0.45460175 | 0.794515 |
| C8orf30B | 0.40656717 | 0.263924 |
| C8orf31  | 0.10092159 | 0.140126 |

|          |            |          |
|----------|------------|----------|
| C8orf33  | 3.05297125 | 2.911483 |
| C8orf34  | 0.00575721 | 0        |
| C8orf37  | 0.13059212 | 0.317903 |
| C8orf38  | 2.05440141 | 1.480317 |
| C8orf39  | 0          | 0        |
| C8orf4   | 0          | 0        |
| C8orf40  | 2.80158158 | 2.968425 |
| C8orf41  | 4.12777323 | 3.558947 |
| C8orf42  | 0.01115402 | 0        |
| C8orf44  | 3.49457895 | 2.918269 |
| C8orf45  | 0.03750505 | 0.017043 |
| C8orf46  | 0.06067917 | 0.034466 |
| C8orf47  | 0          | 0.01541  |
| C8orf48  | 0          | 0        |
| C8orf49  | 0          | 0        |
| C8orf51  | 0          | 0        |
| C8orf55  | 0.10215488 | 0.421998 |
| C8orf56  | 0          | 0        |
| C8orf58  | 3.4496283  | 3.27926  |
| C8orf59  | 7.61261983 | 5.902642 |
| C8orf62  | 0          | 0        |
| C8orf71  | 0          | 0        |
| C8orf73  | 9.52639573 | 12.57072 |
| C8orf74  | 0          | 0        |
| C8orf75  | 0          | 0        |
| C8orf76  | 13.8315941 | 13.00123 |
| C8orf77  | 0          | 0        |
| C8orf79  | 0          | 0.004772 |
| C8orf80  | 0.0270457  | 0.030724 |
| C8orf81  | 0          | 0        |
| C8orf82  | 3.8415848  | 2.583845 |
| C8orf83  | 0          | 0        |
| C8orf84  | 0.38751268 | 0.427643 |
| C8orf85  | 0.0117723  | 0        |
| C8orf86  | 0.00934459 | 0        |
| C8ORFK29 | 0          | 0        |
| C9       | 0          | 0        |
| C9orf100 | 0.04469908 | 0.031737 |
| C9orf102 | 0.83703168 | 0.786405 |
| C9orf103 | 1.02912091 | 0.710338 |
| C9orf106 | 0          | 0.028333 |
| C9orf109 | 0          | 0        |
| C9orf11  | 0          | 0        |
| C9orf110 | 0          | 0        |
| C9orf114 | 3.89693634 | 3.397451 |
| C9orf116 | 0.17472574 | 0.066164 |
| C9orf117 | 0.04883933 | 0.069353 |



|           |            |          |
|-----------|------------|----------|
| C9orf119  | 3.70783105 | 3.359985 |
| C9orf122  | 0          | 0        |
| C9orf123  | 0.92149621 | 0.614655 |
| C9orf125  | 0          | 0        |
| C9orf126  | 0.20731633 | 0.168785 |
| C9orf127  | 0.01020399 | 0.017388 |
| C9orf128  | 0          | 0.013871 |
| C9orf129  | 0.0728781  | 0.062093 |
| C9orf130  | 0          | 0        |
| C9orf131  | 0.12824047 | 0.201182 |
| C9orf135  | 0          | 0        |
| C9orf139  | 2.57925423 | 3.925547 |
| C9orf140  | 0.44431302 | 0.729078 |
| C9orf142  | 18.8502967 | 34.62164 |
| C9orf144  | 0          | 0        |
| C9orf144B | 0.00489189 | 0        |
| C9orf147  | 0          | 0        |
| C9orf150  | 0          | 0        |
| C9orf152  | 0.00790129 | 0.008976 |
| C9orf153  | 0          | 0        |
| C9orf156  | 18.9560092 | 16.06368 |
| C9orf16   | 31.5232522 | 34.40394 |
| C9orf163  | 0.10622981 | 0.241357 |
| C9orf167  | 19.7748689 | 26.56771 |
| C9orf169  | 0.05682522 | 0.064554 |
| C9orf170  | 0.01233519 | 0        |
| C9orf171  | 0          | 0        |
| C9orf21   | 8.73623956 | 7.740725 |
| C9orf23   | 4.30990164 | 3.352296 |
| C9orf24   | 0.03171241 | 0        |
| C9orf25   | 1.41572902 | 1.455437 |
| C9orf27   | 0          | 0        |
| C9orf29   | 0          | 0        |
| C9orf3    | 0.32059902 | 0.355736 |
| C9orf30   | 4.62194775 | 5.621237 |
| C9orf31   | 0          | 0        |
| C9orf37   | 4.86248648 | 4.680655 |
| C9orf4    | 0          | 0        |
| C9orf40   | 2.83050692 | 1.756711 |
| C9orf41   | 1.42853366 | 1.884233 |
| C9orf43   | 0.01026627 | 0.011663 |
| C9orf45   | 0          | 0        |
| C9orf46   | 1.37720508 | 0.834414 |
| C9orf47   | 0          | 0.004878 |
| C9orf5    | 4.84552769 | 4.148608 |
| C9orf50   | 2.1155117  | 3.184681 |
| C9orf51   | 0          | 0        |

|         |            |          |
|---------|------------|----------|
| C9orf53 | 0          | 0        |
| C9orf57 | 0          | 0        |
| C9orf6  | 3.36493267 | 2.898193 |
| C9orf61 | 0.00847112 | 0        |
| C9orf62 | 0          | 0        |
| C9orf64 | 6.50136548 | 6.159539 |
| C9orf66 | 1.78858702 | 2.066156 |
| C9orf68 | 0.021631   | 0        |
| C9orf69 | 6.16348894 | 6.481302 |
| C9orf7  | 3.98374692 | 3.485232 |
| C9orf70 | 0          | 0        |
| C9orf71 | 0.01688782 | 0        |
| C9orf72 | 5.45457158 | 5.235616 |
| C9orf75 | 2.14239154 | 2.197958 |
| C9orf78 | 58.8894308 | 68.56787 |
| C9orf79 | 0          | 0        |
| C9orf80 | 7.1050167  | 6.159349 |
| C9orf82 | 2.11492828 | 2.279382 |
| C9orf84 | 0.01683036 | 0.00956  |
| C9orf85 | 1.9157477  | 1.595968 |
| C9orf86 | 15.3768351 | 16.30581 |
| C9orf89 | 114.571809 | 149.6378 |
| C9orf9  | 0.20469724 | 0.13288  |
| C9orf91 | 1.23564847 | 1.315984 |
| C9orf93 | 0.03376401 | 0.027397 |
| C9orf95 | 9.6755295  | 10.29082 |
| C9orf96 | 0.03026316 | 0.042974 |
| C9orf97 | 5.53648056 | 5.31859  |
| C9orf98 | 0          | 0.022683 |
| CA1     | 0          | 0.016952 |
| CA10    | 0          | 0.012353 |
| CA11    | 0.58509693 | 0.534633 |
| CA12    | 0.02115757 | 0.042062 |
| CA13    | 0.50722588 | 0.681547 |
| CA14    | 0.04836189 | 0.041205 |
| CA2     | 0.47956937 | 0.659493 |
| CA3     | 0.05996957 | 0.122627 |
| CA4     | 21.0799422 | 23.2854  |
| CA5A    | 0.21335668 | 0.132205 |
| CA5B    | 0.50890224 | 0.388054 |
| CA5BP   | 0          | 0        |
| CA6     | 0          | 0.017838 |
| CA7     | 0          | 0.025822 |
| CA8     | 0.11075679 | 0.104851 |
| CA9     | 0          | 0        |
| CAB39   | 31.1455882 | 28.17782 |
| CAB39L  | 1.3753412  | 1.316973 |

|          |            |          |
|----------|------------|----------|
| CABC1    | 36.8662352 | 33.65481 |
| CABIN1   | 14.1692448 | 21.62624 |
| CABLES1  | 0.41780319 | 0.483938 |
| CABLES2  | 3.79400292 | 3.969282 |
| CABP1    | 0.04428716 | 0.037733 |
| CABP2    | 0          | 0        |
| CABP4    | 0.44460113 | 0.668001 |
| CABP5    | 0          | 0        |
| CABP7    | 0.07050748 | 0.088107 |
| CABYR    | 0.00887519 | 0.010082 |
| CABYRP   | 0          | 0        |
| CACHD1   | 0.11959801 | 0.063404 |
| CACNA1A  | 0.03372532 | 0.01642  |
| CACNA1B  | 0.00859053 | 0.004879 |
| CACNA1C  | 0.00301309 | 0.008557 |
| CACNA1D  | 2.82581303 | 2.494101 |
| CACNA1E  | 0.03459536 | 0.036845 |
| CACNA1F  | 0.10737813 | 0.098374 |
| CACNA1G  | 0.00250123 | 0.005683 |
| CACNA1H  | 0.00259957 | 0.005906 |
| CACNA1I  | 0.00840845 | 0.016716 |
| CACNA1S  | 0.01022633 | 0.030979 |
| CACNA2D1 | 0.00550113 | 0        |
| CACNA2D2 | 0.25180037 | 0.147494 |
| CACNA2D3 | 0          | 0.012999 |
| CACNA2D4 | 0.89720671 | 0.777842 |
| CACNB1   | 0.07257264 | 0.041222 |
| CACNB2   | 0.23956476 | 0.224123 |
| CACNB3   | 0.07792932 | 0.044264 |
| CACNB4   | 0.02461983 | 0.013984 |
| CACNG1   | 0          | 0.018867 |
| CACNG2   | 0.01358226 | 0        |
| CACNG3   | 0.00778428 | 0.017686 |
| CACNG4   | 0.00618938 | 0.014062 |
| CACNG5   | 0          | 0        |
| CACNG6   | 28.1512134 | 18.5271  |
| CACNG7   | 0.01344331 | 0        |
| CACNG8   | 2.98242168 | 1.887884 |
| CACYBP   | 6.39322281 | 5.620026 |
| CAD      | 1.28967984 | 1.226514 |
| CADM1    | 0.00976333 | 0.005546 |
| CADM2    | 0.04417086 | 0.028674 |
| CADM3    | 0          | 0.006459 |
| CADM4    | 2.31897033 | 3.249077 |
| CADPS    | 0.00378767 | 0.008606 |
| CADPS2   | 0.00361882 | 0        |
| CAGE1    | 0.02949889 | 0        |

|           |            |          |
|-----------|------------|----------|
| CALB1     | 0.0332285  | 0        |
| CALB2     | 0.01441078 | 0        |
| CALCA     | 0          | 0.016916 |
| CALCB     | 0          | 0.023167 |
| CALCOCO1  | 79.1245466 | 69.01275 |
| CALCOCO2  | 30.9294022 | 27.94601 |
| CALCP     | 0          | 0        |
| CALCR     | 0          | 0        |
| CALCRL    | 0.04626498 | 0.038224 |
| CALD1     | 0.01533297 | 0        |
| CALHM1    | 0.02064005 | 0.015632 |
| CALHM2    | 0.09708978 | 0.07353  |
| CALHM3    | 0          | 0.014458 |
| CALM1     | 58.7217825 | 56.59992 |
| CALM1P1   | 0          | 0        |
| CALM1P2   | 0          | 0        |
| CALM2     | 258.883707 | 276.4574 |
| CALM2P1   | 0          | 0        |
| CALM2P2   | 0          | 0        |
| CALM2P3   | 0          | 0        |
| CALM3     | 45.2244724 | 39.80852 |
| CALML3    | 0          | 0        |
| CALML4    | 3.74237282 | 4.117412 |
| CALML5    | 0          | 0        |
| CALML6    | 0.01909658 | 0        |
| CALN1     | 0.00631961 | 0.007179 |
| CALR      | 69.358287  | 69.11808 |
| CALR3     | 0.01636213 | 0        |
| CALU      | 6.10808033 | 5.500733 |
| CALY      | 0          | 0.024298 |
| CAMK1     | 155.159287 | 162.1224 |
| CAMK1D    | 79.0302793 | 73.91533 |
| CAMK1G    | 0          | 0        |
| CAMK2A    | 0.00428738 | 0.009741 |
| CAMK2B    | 0.01374504 | 0        |
| CAMK2D    | 0.0448522  | 0.023517 |
| CAMK2G    | 33.7707273 | 25.74311 |
| CAMK2N1   | 0.01788629 | 0.020319 |
| CAMK2N2   | 0          | 0        |
| CAMK4     | 0.0898092  | 0.045344 |
| CAMKK1    | 12.1747841 | 16.82305 |
| CAMKK2    | 14.8700891 | 12.21564 |
| CAMKV     | 0          | 0        |
| CAMLG     | 8.85678944 | 8.90135  |
| CAMP      | 1.3251259  | 1.405006 |
| CAMSAP1   | 2.36951705 | 2.309948 |
| CAMSAP1L1 | 0          | 0.012995 |

|         |            |          |
|---------|------------|----------|
| CAMTA1  | 0.51554649 | 0.492301 |
| CAMTA2  | 17.0645815 | 16.20451 |
| CAND1   | 8.10336469 | 8.380811 |
| CAND2   | 0.02485851 | 0        |
| CANT1   | 23.2531806 | 22.48213 |
| CANX    | 33.1914118 | 31.543   |
| CAP1    | 402.097134 | 401.4387 |
| CAP2    | 0          | 0        |
| CAP2P1  | 0          | 0        |
| CAPG    | 85.8655853 | 108.9406 |
| CAPN1   | 42.1135911 | 42.47212 |
| CAPN10  | 7.84824854 | 9.560907 |
| CAPN11  | 0          | 0        |
| CAPN12  | 1.04824277 | 0.916016 |
| CAPN13  | 0          | 0.008906 |
| CAPN14  | 0.00550113 | 0        |
| CAPN2   | 5.3346955  | 5.601496 |
| CAPN3   | 0.93934866 | 0.855615 |
| CAPN5   | 0.05743318 | 0.070682 |
| CAPN6   | 0          | 0        |
| CAPN7   | 13.5788596 | 12.19409 |
| CAPN8   | 0          | 0        |
| CAPN9   | 0          | 0        |
| CAPNS1  | 58.4526962 | 57.46647 |
| CAPNS2  | 0          | 0        |
| CAPRIN1 | 14.3263988 | 13.61879 |
| CAPRIN2 | 10.9509862 | 13.8997  |
| CAPS    | 2.74413891 | 3.191609 |
| CAPS2   | 0.06893551 | 0.111874 |
| CAPSL   | 0          | 0        |
| CAPZA1  | 105.372206 | 100.2826 |
| CAPZA1P | 0          | 0        |
| CAPZA2  | 38.7576453 | 39.60914 |
| CAPZA3  | 0          | 0        |
| CAPZB   | 174.87118  | 165.6868 |
| CARD10  | 0.03235496 | 0.012252 |
| CARD11  | 0.28854526 | 0.322329 |
| CARD14  | 0.00480799 | 0        |
| CARD16  | 7.15637914 | 6.081565 |
| CARD17  | 0          | 0        |
| CARD18  | 0          | 0        |
| CARD6   | 2.05275382 | 1.375857 |
| CARD8   | 29.3060891 | 29.84155 |
| CARD9   | 10.9929898 | 19.23859 |
| CARHSP1 | 3.49045278 | 3.808791 |
| CARKD   | 2.17203832 | 2.305963 |
| CARM1   | 1.28928916 | 1.818745 |

|            |            |          |
|------------|------------|----------|
| CARM1L     | 0          | 0        |
| CARS       | 17.1794163 | 16.60058 |
| CARS2      | 22.0406616 | 17.04228 |
| CARTPT     | 0          | 0        |
| CASC1      | 0.12459455 | 0.079617 |
| CASC2      | 0          | 0        |
| CASC3      | 41.1704148 | 34.21628 |
| CASC4      | 13.8434898 | 13.40485 |
| CASC5      | 0.28726867 | 0.245533 |
| CASD1      | 3.2821614  | 3.021017 |
| CASK       | 0.19222004 | 0.172393 |
| CASKIN1    | 0.01845947 | 0.008388 |
| CASKIN2    | 0.06146559 | 0.060516 |
| CASKP1     | 0          | 0        |
| CASP1      | 20.7309453 | 14.87319 |
| CASP10     | 1.78158362 | 1.460668 |
| CASP12     | 0          | 0        |
| CASP14     | 0          | 0        |
| CASP2      | 25.9365059 | 23.95456 |
| CASP3      | 29.4102927 | 13.93075 |
| CASP4      | 3.52893425 | 2.930895 |
| CASP5      | 0          | 0.016052 |
| CASP6      | 2.22784964 | 2.343933 |
| CASP7      | 1.82828965 | 2.028287 |
| CASP8      | 159.420598 | 154.9363 |
| CASP8AP2   | 3.44412577 | 3.280495 |
| CASP9      | 8.32362575 | 6.95101  |
| CASQ1      | 0.11195597 | 0.063592 |
| CASQ2      | 0          | 0        |
| CASR       | 0.00439401 | 0.009983 |
| CASS4      | 27.956668  | 28.67152 |
| CAST       | 8.10492597 | 6.900678 |
| CASZ1      | 3.15651227 | 2.933112 |
| CAT        | 511.060355 | 347.115  |
| CATSPER1   | 0.15253199 | 0.145919 |
| CATSPER2   | 0.4391714  | 0.374179 |
| CATSPER2P1 | 0          | 0        |
| CATSPER3   | 0.12571199 | 0.178514 |
| CATSPER4   | 0.01481701 | 0        |
| CATSPERB   | 0          | 0        |
| CAV1       | 0          | 0.008833 |
| CAV2       | 0.00636938 | 0.014471 |
| CAV3       | 0          | 0        |
| CBARA1     | 6.71943567 | 4.461837 |
| CBFA2T2    | 5.6088795  | 6.760961 |
| CBFA2T3    | 4.23722369 | 5.952474 |
| CBFB       | 25.450305  | 36.68832 |

|          |            |          |
|----------|------------|----------|
| CBL      | 25.58547   | 26.18703 |
| CBLB     | 6.66295699 | 2.997653 |
| CBLC     | 0          | 0.015013 |
| CBLL1    | 9.20166266 | 8.784748 |
| CBLN1    | 0.02076576 | 0.011795 |
| CBLN2    | 0          | 0        |
| CBLN3    | 0.13443306 | 0.142537 |
| CBLN4    | 0          | 0        |
| CBR1     | 0.45597103 | 0.287772 |
| CBR3     | 0.20798439 | 0.214794 |
| CBR4     | 3.5954776  | 3.503979 |
| CBS      | 0.05682522 | 0.018444 |
| CBWD1    | 4.90706516 | 5.272825 |
| CBWD2    | 13.4777763 | 11.20905 |
| CBWD3    | 1.70541503 | 1.591418 |
| CBWD5    | 1.92598452 | 0.896451 |
| CBWD6    | 4.48882866 | 3.654324 |
| CBWD7    | 0.25301241 | 0.057485 |
| CBX1     | 7.85699961 | 7.310129 |
| CBX2     | 0.00428214 | 0.019458 |
| CBX3     | 72.6972017 | 80.1769  |
| CBX3P1   | 0          | 0        |
| CBX4     | 29.2798965 | 29.43937 |
| CBX5     | 6.29094626 | 6.041717 |
| CBX6     | 6.58446814 | 5.604572 |
| CBX7     | 32.9753992 | 29.30807 |
| CBX8     | 4.50641545 | 3.234933 |
| CBY1     | 1.83620121 | 1.127543 |
| CBY3     | 0.02699016 | 0        |
| CC2D1A   | 8.4563419  | 9.120962 |
| CC2D1B   | 12.0581522 | 12.27082 |
| CC2D2A   | 0.05494766 | 0.035669 |
| CC2D2B   | 0.65086707 | 0.580953 |
| CCAR1    | 15.9624661 | 15.05047 |
| CCBE1    | 0          | 0        |
| CCBL1    | 0.54611249 | 0.657616 |
| CCBL2    | 9.09002457 | 8.703932 |
| CCBP2    | 2.32273082 | 1.702621 |
| CCDC101  | 14.1934684 | 14.73365 |
| CCDC102A | 0.07790366 | 0.098333 |
| CCDC102B | 0.00720292 | 0        |
| CCDC103  | 0.08369957 | 0.05705  |
| CCDC104  | 6.00492516 | 4.872636 |
| CCDC105  | 0.01213934 | 0.01379  |
| CCDC106  | 0.17934301 | 0.23969  |
| CCDC107  | 1.44291487 | 1.222876 |
| CCDC108  | 0.00543782 | 0.003089 |

|           |            |          |
|-----------|------------|----------|
| CCDC109A  | 10.8156755 | 9.532985 |
| CCDC109B  | 0.16503399 | 0.149985 |
| CCDC11    | 0.04610818 | 0.104759 |
| CCDC110   | 0.00725512 | 0        |
| CCDC111   | 3.42635023 | 1.654785 |
| CCDC112   | 5.2325815  | 4.782003 |
| CCDC113   | 0.00398811 | 0.004531 |
| CCDC114   | 0.20894739 | 0.22995  |
| CCDC115   | 11.4334829 | 9.109467 |
| CCDC116   | 0.05755109 | 0.152551 |
| CCDC117   | 7.44460276 | 6.377354 |
| CCDC12    | 26.6370741 | 32.47015 |
| CCDC120   | 1.06397068 | 0.99822  |
| CCDC121   | 0.50573842 | 0.540731 |
| CCDC122   | 0.38722611 | 0.535007 |
| CCDC123   | 0.69411841 | 0.632657 |
| CCDC124   | 9.8234695  | 10.23332 |
| CCDC125   | 19.7286914 | 16.43422 |
| CCDC126   | 8.03434604 | 6.152371 |
| CCDC127   | 4.5604239  | 3.767792 |
| CCDC129   | 0          | 0        |
| CCDC13    | 0.35661339 | 0.295399 |
| CCDC130   | 22.558428  | 21.39708 |
| CCDC132   | 0.92858127 | 0.875873 |
| CCDC134   | 3.83325674 | 3.644442 |
| CCDC135   | 0.35391316 | 0.33641  |
| CCDC136   | 0.40860168 | 0.401141 |
| CCDC137   | 9.83973526 | 8.7205   |
| CCDC137P  | 0          | 0        |
| CCDC138   | 0.30638005 | 0.250163 |
| CCDC14    | 6.88959973 | 6.623027 |
| CCDC140   | 0          | 0        |
| CCDC141   | 0.15549637 | 0.113558 |
| CCDC142   | 0.73654075 | 0.671579 |
| CCDC144A  | 0.84058032 | 0.774586 |
| CCDC144B  | 0.3922296  | 0.393768 |
| CCDC144C  | 0          | 0        |
| CCDC144NL | 0          | 0.008512 |
| CCDC146   | 4.02465081 | 2.57985  |
| CCDC147   | 0.30462297 | 0.266752 |
| CCDC148   | 0          | 0.010926 |
| CCDC149   | 0.00304054 | 0.013816 |
| CCDC15    | 0.21603217 | 0.165656 |
| CCDC150   | 0.10840741 | 0.097226 |
| CCDC151   | 0          | 0.011048 |
| CCDC152   | 0.0240909  | 0.03421  |
| CCDC153   | 6.3596829  | 5.947922 |



|          |            |          |
|----------|------------|----------|
| CCDC154  | 0.62375468 | 0.610482 |
| CCDC155  | 0          | 0.010199 |
| CCDC157  | 2.40149468 | 2.322495 |
| CCDC158  | 0.02319397 | 0.019762 |
| CCDC17   | 3.04828218 | 2.574975 |
| CCDC18   | 1.85517626 | 1.548584 |
| CCDC19   | 7.67219598 | 9.886705 |
| CCDC21   | 23.0824472 | 22.2523  |
| CCDC22   | 6.10237967 | 5.964679 |
| CCDC23   | 9.77493457 | 7.422941 |
| CCDC24   | 0.12934243 | 0.228566 |
| CCDC25   | 2.69170446 | 2.408196 |
| CCDC27   | 0          | 0        |
| CCDC28A  | 18.2566209 | 14.57694 |
| CCDC28B  | 2.90087234 | 2.560092 |
| CCDC29   | 0.51149973 | 0.489324 |
| CCDC3    | 0.00768189 | 0        |
| CCDC33   | 0.00555051 | 0        |
| CCDC34   | 0.03572092 | 0.04058  |
| CCDC36   | 0.06167796 | 0.124564 |
| CCDC37   | 0.05039629 | 0.148853 |
| CCDC38   | 0          | 0        |
| CCDC39   | 1.6584589  | 1.536976 |
| CCDC40   | 0.01468933 | 0.066749 |
| CCDC41   | 0.69758462 | 0.725811 |
| CCDC42   | 0.06120911 | 0.017384 |
| CCDC43   | 3.16658399 | 2.915816 |
| CCDC44   | 3.50662692 | 3.03277  |
| CCDC45   | 13.5246555 | 13.72218 |
| CCDC46   | 0.00535814 | 0.006087 |
| CCDC47   | 16.1610324 | 16.24942 |
| CCDC48   | 0          | 0.024335 |
| CCDC49   | 20.7636423 | 18.81081 |
| CCDC50   | 0.21849992 | 0.224198 |
| CCDC51   | 1.04707824 | 1.030898 |
| CCDC52   | 1.32759065 | 1.135507 |
| CCDC53   | 9.1424495  | 7.952983 |
| CCDC54   | 0          | 0        |
| CCDC55   | 9.98682187 | 11.60325 |
| CCDC56   | 5.77987186 | 5.868188 |
| CCDC57   | 6.67170162 | 8.782579 |
| CCDC58   | 0.17569914 | 0.43246  |
| CCDC58P1 | 0          | 0        |
| CCDC59   | 10.8063154 | 11.1197  |
| CCDC6    | 0.41610872 | 0.334353 |
| CCDC60   | 0          | 0        |
| CCDC61   | 6.87787539 | 6.622392 |

|         |            |          |
|---------|------------|----------|
| CCDC62  | 0.97272553 | 0.918371 |
| CCDC63  | 0          | 0.01228  |
| CCDC64  | 0.77113353 | 1.054325 |
| CCDC64B | 0.22058602 | 0.2374   |
| CCDC65  | 0.34752613 | 0.328996 |
| CCDC66  | 7.35753174 | 6.895764 |
| CCDC67  | 0          | 0.008959 |
| CCDC68  | 0          | 0.005679 |
| CCDC69  | 104.71221  | 101.0145 |
| CCDC7   | 0.29201849 | 0.287506 |
| CCDC70  | 0          | 0        |
| CCDC71  | 8.50528013 | 8.778964 |
| CCDC72  | 144.543474 | 144.4456 |
| CCDC73  | 0.06807704 | 0.071388 |
| CCDC74A | 0.04329169 | 0.131147 |
| CCDC74B | 0.11434578 | 0.032475 |
| CCDC75  | 4.3990947  | 3.040268 |
| CCDC76  | 1.12887683 | 0.748079 |
| CCDC77  | 3.43989852 | 2.792633 |
| CCDC78  | 0.22186879 | 0.207568 |
| CCDC79  | 0.0085958  | 0        |
| CCDC8   | 0.00630634 | 0.007164 |
| CCDC80  | 0.00464648 | 0.005278 |
| CCDC81  | 0.02512988 | 0.009516 |
| CCDC82  | 9.49605607 | 8.364163 |
| CCDC83  | 0.00896603 | 0        |
| CCDC84  | 16.3025029 | 15.38026 |
| CCDC85A | 0.01055754 | 0        |
| CCDC85B | 4.36889994 | 10.12015 |
| CCDC85C | 0.05932028 | 0.071601 |
| CCDC86  | 8.72316461 | 9.554044 |
| CCDC87  | 0.00721281 | 0        |
| CCDC88A | 1.18235357 | 0.893015 |
| CCDC88B | 104.16843  | 119.5227 |
| CCDC88C | 2.93703208 | 3.157887 |
| CCDC89  | 0          | 0        |
| CCDC9   | 14.5598899 | 15.94256 |
| CCDC90A | 1.31729087 | 0.971729 |
| CCDC90B | 10.2722233 | 9.180744 |
| CCDC91  | 3.25960163 | 3.099438 |
| CCDC92  | 8.92374616 | 12.22896 |
| CCDC93  | 21.4864399 | 21.05152 |
| CCDC94  | 7.3746687  | 6.975751 |
| CCDC96  | 0.20507754 | 0.188596 |
| CCDC97  | 13.481022  | 15.08458 |
| CCDC99  | 0.63044471 | 0.420765 |
| CCHCR1  | 2.98379284 | 2.617114 |

|             |            |          |
|-------------|------------|----------|
| CCIN        | 0.08656853 | 0.08605  |
| CCK         | 0          | 0        |
| CCKAR       | 0          | 0        |
| CCKBR       | 0          | 0.011267 |
| CCL1        | 0.03879212 | 0        |
| CCL11       | 0          | 0        |
| CCL13       | 0          | 0        |
| CCL14       | 0.01391485 | 0        |
| CCL14-CCL15 | 0          | 0        |
| CCL15       | 0          | 0        |
| CCL16       | 0          | 0        |
| CCL17       | 0          | 0.038838 |
| CCL18       | 0.08191687 | 0.03102  |
| CCL19       | 0.06147758 | 0.03492  |
| CCL2        | 0.70178007 | 0.47834  |
| CCL20       | 0.29964842 | 0.39714  |
| CCL21       | 0          | 0        |
| CCL22       | 0.35599213 | 0.379653 |
| CCL23       | 19.2423829 | 15.05717 |
| CCL24       | 0.29201849 | 0.066348 |
| CCL25       | 0          | 0        |
| CCL26       | 0.07482324 | 0        |
| CCL27       | 0.094284   | 0.053554 |
| CCL28       | 0          | 0.058542 |
| CCL3        | 0.94970127 | 0.959001 |
| CCL3L1      | 0.16111365 | 0.030505 |
| CCL3L2      | 0          | 0        |
| CCL3L3      | 1.35647297 | 1.510155 |
| CCL4        | 8.41643683 | 7.341001 |
| CCL4L1      | 9.66718556 | 5.835361 |
| CCL4L2      | 0.44380646 | 0.8823   |
| CCL5        | 1.05981343 | 0.970939 |
| CCL7        | 0          | 0.029671 |
| CCL8        | 0          | 0        |
| CCM2        | 48.9344975 | 50.68076 |
| CCNA1       | 0.21007064 | 0.166013 |
| CCNA2       | 0.16531711 | 0.093901 |
| CCNB1       | 0.20091095 | 0.091295 |
| CCNB1IP1    | 0.6115247  | 0.492607 |
| CCNB2       | 0.9727516  | 2.320629 |
| CCNB3       | 0.01397651 | 0.010585 |
| CCNC        | 5.25861117 | 5.632206 |
| CCND1       | 0.13235811 | 0.194912 |
| CCND2       | 25.8577399 | 22.57403 |
| CCND2P      | 0          | 0        |
| CCND3       | 30.7874017 | 28.87309 |
| CCND3P      | 0          | 0        |

|         |            |          |
|---------|------------|----------|
| CCNDBP1 | 69.3182526 | 65.83648 |
| CCNE1   | 0.05293386 | 0.07216  |
| CCNE2   | 0.85581655 | 0.569319 |
| CCNF    | 0.19127313 | 0.189432 |
| CCNG1   | 13.2473216 | 11.41027 |
| CCNG2   | 82.1117145 | 106.8852 |
| CCNH    | 20.5981109 | 17.78383 |
| CCNI    | 176.902785 | 177.7255 |
| CCNI2   | 0.00892795 | 0        |
| CCNJ    | 2.20410474 | 2.048119 |
| CCNJL   | 3.16600127 | 2.976519 |
| CCNK    | 29.2063308 | 28.88027 |
| CCNL1   | 63.0679832 | 62.20137 |
| CCNL2   | 46.0729685 | 46.47827 |
| CCNO    | 0.01467225 | 0        |
| CCNT1   | 8.44124463 | 7.738478 |
| CCNT2   | 17.6272052 | 16.72634 |
| CCNY    | 18.3713138 | 19.61711 |
| CCNYL1  | 5.07767385 | 4.169059 |
| CCNYL2  | 0.02370387 | 0.040392 |
| CCNYL3  | 0          | 0        |
| CCPG1   | 56.7162854 | 55.78303 |
| CCR1    | 1.38283193 | 0.687277 |
| CCR10   | 0.15211252 | 0.307204 |
| CCR2    | 0.11155579 | 0.126729 |
| CCR3    | 379.472092 | 295.6105 |
| CCR4    | 0.07613276 | 0.014415 |
| CCR5    | 0.03445834 | 0.052194 |
| CCR6    | 0.06843069 | 0.07126  |
| CCR7    | 1.27719452 | 1.05521  |
| CCR8    | 0.01413943 | 0.016063 |
| CCR9    | 0          | 0        |
| CCRK    | 0.64639572 | 0.476313 |
| CCRL1   | 0          | 0        |
| CCRL1P  | 0          | 0        |
| CCRL2   | 1.05915386 | 0.934412 |
| CCRN4L  | 0.9684134  | 1.136804 |
| CCS     | 24.1424585 | 24.07027 |
| CCT2    | 6.12252473 | 4.608335 |
| CCT3    | 10.5628213 | 10.16485 |
| CCT4    | 6.6300958  | 6.375503 |
| CCT5    | 11.8564825 | 10.57739 |
| CCT6A   | 14.0879188 | 13.60124 |
| CCT6B   | 0.92622603 | 1.183733 |
| CCT6P1  | 0          | 0        |
| CCT7    | 14.8021886 | 13.59633 |
| CCT7P2  | 0          | 0        |

|          |            |          |
|----------|------------|----------|
| CCT8     | 19.3277713 | 17.16703 |
| CCT8L1   | 0          | 0.01176  |
| CCT8L2   | 0          | 0        |
| CD109    | 0.03115853 | 0.037925 |
| CD14     | 0.036126   | 0.01368  |
| CD151    | 38.7387312 | 68.91062 |
| CD160    | 0.71478033 | 0.735398 |
| CD163    | 0          | 0        |
| CD163L1  | 0.00458768 | 0        |
| CD164    | 96.5124848 | 128.2827 |
| CD164L2  | 0.05464673 | 0.077599 |
| CD177    | 0.01778793 | 0        |
| CD177P   | 0          | 0        |
| CD180    | 0.054189   | 0.052765 |
| CD19     | 0.2048622  | 0.208229 |
| CD1A     | 0          | 0        |
| CD1B     | 0          | 0        |
| CD1C     | 0.0324465  | 0        |
| CD1D     | 0.01666913 | 0.012624 |
| CD1E     | 0.01019163 | 0        |
| CD2      | 0.19226299 | 0.327621 |
| CD200    | 0.0458868  | 0.020851 |
| CD200R1  | 6.27163606 | 2.471217 |
| CD200R1L | 0.04866975 | 0        |
| CD207    | 0          | 0        |
| CD209    | 0          | 0        |
| CD22     | 0.27521742 | 0.283568 |
| CD226    | 0.05579125 | 0.099597 |
| CD24     | 11.0624104 | 13.77229 |
| CD244    | 27.9484099 | 14.28452 |
| CD247    | 0.35021372 | 0.284177 |
| CD248    | 0.00821944 | 0.018675 |
| CD24L1   | 0          | 0        |
| CD24L2   | 0          | 0        |
| CD24P4   | 0          | 0        |
| CD27     | 0.6689878  | 0.361896 |
| CD274    | 0.12287531 | 0.046529 |
| CD276    | 0.0061821  | 0.007023 |
| CD28     | 0.02761404 | 0.018822 |
| CD2AP    | 10.18633   | 9.881515 |
| CD2BP2   | 31.2767931 | 29.4078  |
| CD300A   | 68.2961518 | 61.31228 |
| CD300C   | 1.27510247 | 0.991933 |
| CD300E   | 0.08535317 | 0.129283 |
| CD300LB  | 134.794918 | 105.2548 |
| CD300LD  | 0.06529606 | 0        |
| CD300LF  | 37.4607091 | 51.93891 |

|         |            |          |
|---------|------------|----------|
| CD300LG | 0.00762893 | 0        |
| CD302   | 43.2501468 | 31.56868 |
| CD320   | 0.53824847 | 0.515918 |
| CD33    | 0.38723324 | 0.35844  |
| CD34    | 0.00747966 | 0        |
| CD36    | 0.01549113 | 0.013199 |
| CD37    | 176.494565 | 183.0232 |
| CD38    | 0.7755823  | 0.624761 |
| CD3D    | 0.31211692 | 0.290103 |
| CD3E    | 0.27792903 | 0.236799 |
| CD3EAP  | 0.76141643 | 1.090312 |
| CD3G    | 0.04811289 | 0.091095 |
| CD4     | 0.96894049 | 1.000665 |
| CD40    | 0.18215014 | 0.162584 |
| CD40LG  | 0.06882269 | 0.052122 |
| CD44    | 18.9015231 | 23.43508 |
| CD46    | 165.458315 | 142.4958 |
| CD46P   | 0          | 0        |
| CD47    | 29.9451683 | 27.76767 |
| CD48    | 18.785249  | 6.384244 |
| CD5     | 0.23302298 | 0.234464 |
| CD52    | 343.732935 | 302.8916 |
| CD53    | 125.480415 | 116.594  |
| CD55    | 49.7782287 | 37.59815 |
| CD58    | 72.7021984 | 88.83162 |
| CD59    | 8.24099296 | 6.420601 |
| CD5L    | 0          | 0.010677 |
| CD6     | 0.29406057 | 0.23965  |
| CD63    | 742.85368  | 756.08   |
| CD68    | 2.95668717 | 3.26876  |
| CD69    | 20.8371568 | 35.78491 |
| CD7     | 0.68828051 | 0.856364 |
| CD70    | 0.04605768 | 0.104645 |
| CD72    | 0.14940481 | 0.154297 |
| CD74    | 689.739176 | 648.3372 |
| CD79A   | 2.25629545 | 3.151771 |
| CD79B   | 0.34931325 | 0.415722 |
| CD80    | 0.02287849 | 0.008663 |
| CD81    | 163.076231 | 223.2627 |
| CD82    | 81.0977051 | 101.0695 |
| CD83    | 6.66056691 | 11.0365  |
| CD84    | 12.0786547 | 5.315093 |
| CD86    | 0.02212416 | 0.083778 |
| CD8A    | 0.3246418  | 0.292869 |
| CD8B    | 0.04384845 | 0.087172 |
| CD8BP   | 0          | 0        |
| CD9     | 335.107225 | 343.1811 |

|                |            |          |
|----------------|------------|----------|
| CD93           | 0.04078933 | 0.021386 |
| CD96           | 6.25927059 | 5.900651 |
| CD97           | 195.659792 | 198.3949 |
| CD99 (NC_00002 | 1.86967373 | 1.40955  |
| CD99 (NC_00002 | 1.07081314 | 1.911581 |
| CD99L2         | 2.06462335 | 2.080423 |
| CD99P1         | 0          | 0        |
| CDA            | 24.7485667 | 21.54636 |
| CDADC1         | 3.79763753 | 3.592766 |
| CDAN1          | 7.76114754 | 7.402869 |
| CDC10L         | 0          | 0        |
| CDC10P         | 0          | 0        |
| CDC123         | 26.1050944 | 18.40758 |
| CDC14A         | 4.38677621 | 3.278001 |
| CDC14B         | 3.23269497 | 2.819799 |
| CDC14BL        | 0          | 0        |
| CDC14C         | 0          | 0        |
| CDC16          | 15.395347  | 13.56233 |
| CDC2           | 0.05238    | 0.047604 |
| CDC20          | 0.01255244 | 0.01426  |
| CDC20B         | 0          | 0.016149 |
| CDC20P         | 0          | 0        |
| CDC23          | 5.95773245 | 4.443917 |
| CDC25A         | 0.11913976 | 0.045115 |
| CDC25B         | 0.24601068 | 0.175482 |
| CDC25C         | 0          | 0        |
| CDC26          | 36.7943292 | 33.8555  |
| CDC27          | 6.63622547 | 6.210724 |
| CDC27P2        | 0          | 0        |
| CDC2L1         | 47.9550357 | 44.71301 |
| CDC2L2         | 59.9077923 | 60.35807 |
| CDC2L5         | 16.6067384 | 17.3561  |
| CDC2L6         | 5.61680123 | 5.380861 |
| CDC34          | 24.1536674 | 26.49677 |
| CDC37          | 72.3367012 | 71.65533 |
| CDC37L1        | 7.18179738 | 7.10364  |
| CDC37P1        | 0          | 0        |
| CDC37P2        | 0          | 0        |
| CDC40          | 13.3256834 | 12.53457 |
| CDC42          | 86.8536096 | 83.14743 |
| CDC42BPA       | 0.04202665 | 0.047743 |
| CDC42BPB       | 0.07216574 | 0.053466 |
| CDC42BPG       | 0.61714028 | 1.11206  |
| CDC42EP1       | 0.03886383 | 0        |
| CDC42EP2       | 0.10613494 | 0.144685 |
| CDC42EP3       | 0.76580583 | 0.875967 |
| CDC42EP4       | 3.76977879 | 3.727956 |

|          |            |          |
|----------|------------|----------|
| CDC42EP5 | 0          | 0        |
| CDC42P1  | 0          | 0        |
| CDC42P2  | 0          | 0        |
| CDC42SE1 | 279.194993 | 303.4152 |
| CDC42SE2 | 116.199881 | 99.09349 |
| CDC45L   | 0.01100803 | 0.012505 |
| CDC5L    | 15.8671164 | 16.60811 |
| CDC6     | 0.11018844 | 0.062588 |
| CDC7     | 0.11697842 | 0.090924 |
| CDC73    | 10.8231066 | 9.409771 |
| CDCA2    | 0.01695591 | 0.025683 |
| CDCA3    | 0.10782221 | 0.061244 |
| CDCA4    | 5.21133356 | 8.393381 |
| CDCA5    | 0.13875413 | 0.074177 |
| CDCA7    | 0.01496465 | 0.017    |
| CDCA7L   | 2.11531014 | 1.927259 |
| CDCA8    | 0.41995885 | 0.165941 |
| CDCP1    | 0.0033689  | 0        |
| CDCP2    | 0          | 0.008772 |
| CDGAP    | 0.08848388 | 0.130084 |
| CDH1     | 0.0698661  | 0.054566 |
| CDH10    | 0          | 0        |
| CDH11    | 0          | 0.006547 |
| CDH12    | 0.19839783 | 0.181406 |
| CDH12P   | 0          | 0        |
| CDH13    | 0.15928281 | 0.068635 |
| CDH15    | 0.00735409 | 0.008354 |
| CDH16    | 0.00742158 | 0.008431 |
| CDH17    | 0          | 0        |
| CDH18    | 0          | 0        |
| CDH19    | 0          | 0.007499 |
| CDH2     | 0          | 0        |
| CDH20    | 0          | 0.008366 |
| CDH22    | 0          | 0.013063 |
| CDH23    | 0.52271386 | 0.547486 |
| CDH24    | 1.43206589 | 1.62685  |
| CDH26    | 1.42355788 | 2.995307 |
| CDH29    | 0.00849165 | 0        |
| CDH3     | 0.01475117 | 0.016758 |
| CDH4     | 0.01374205 | 0.039028 |
| CDH5     | 0.01528004 | 0.005786 |
| CDH6     | 0          | 0        |
| CDH7     | 0.00710796 | 0        |
| CDH8     | 0          | 0        |
| CDH9     | 0          | 0        |
| CDIPT    | 37.6750594 | 36.88554 |
| CDK10    | 3.64533143 | 3.52666  |



|            |            |          |
|------------|------------|----------|
| CDK2       | 3.75943554 | 3.010378 |
| CDK2AP1    | 95.1021936 | 98.12861 |
| CDK2AP2    | 10.451634  | 9.325246 |
| CDK3       | 4.36576936 | 4.366259 |
| CDK4       | 2.33129103 | 2.135259 |
| CDK4PS     | 0          | 0        |
| CDK5       | 5.08528233 | 6.869332 |
| CDK5R1     | 0.62737755 | 0.570169 |
| CDK5R2     | 0.01695591 | 0.009631 |
| CDK5RAP1   | 5.84930336 | 4.863794 |
| CDK5RAP2   | 8.69699485 | 7.67544  |
| CDK5RAP3   | 85.429357  | 77.60125 |
| CDK6       | 4.50823709 | 5.64738  |
| CDK7       | 14.2756038 | 12.48576 |
| CDK7PS     | 0          | 0        |
| CDK8       | 6.64395704 | 6.75102  |
| CDK9       | 56.799013  | 66.22514 |
| CDKAL1     | 1.34464326 | 1.339074 |
| CDKL1      | 1.44694291 | 1.400232 |
| CDKL2      | 0.02229622 | 0.015197 |
| CDKL3      | 0.09295018 | 0.052796 |
| CDKL4      | 0          | 0.015243 |
| CDKL5      | 1.13553521 | 1.099883 |
| CDKN1A     | 69.1081512 | 126.4451 |
| CDKN1B     | 63.4593806 | 59.29209 |
| CDKN1C     | 1.30727446 | 2.759782 |
| CDKN2A     | 0.12942285 | 0.080196 |
| CDKN2AIP   | 13.4707365 | 14.19625 |
| CDKN2AIPNL | 1.76945855 | 1.359796 |
| CDKN2B     | 0.0369421  | 0.023981 |
| CDKN2BAS   | 0          | 0        |
| CDKN2C     | 6.7369301  | 6.332735 |
| CDKN2D     | 30.2156021 | 34.02327 |
| CDKN3      | 0.14126762 | 0.133735 |
| CDO1       | 0.02605369 | 0.014799 |
| CDON       | 0.00522563 | 0.008905 |
| CDR1       | 0          | 0        |
| CDR2       | 2.21769775 | 2.050831 |
| CDR2L      | 0.02973039 | 0.033774 |
| CDRT1      | 0          | 0.017289 |
| CDRT15     | 0.07416342 | 0.084251 |
| CDRT15L1   | 0.01291482 | 0.029343 |
| CDRT15L2   | 0          | 0        |
| CDRT15P    | 0          | 0        |
| CDRT4      | 2.93966058 | 2.562203 |
| CDS1       | 0.00463317 | 0.010527 |
| CDS2       | 14.3616074 | 11.58922 |

|          |            |          |
|----------|------------|----------|
| CDSN     | 0          | 0        |
| CDT1     | 0.09431924 | 0.169651 |
| CDV3     | 48.5237271 | 46.70082 |
| CDX1     | 0.01186531 | 0        |
| CDX2     | 0          | 0        |
| CDX4     | 0          | 0        |
| CDY1     | 0          | 0        |
| CDY10P   | 0          | 0        |
| CDY11P   | 0          | 0        |
| CDY12P   | 0          | 0        |
| CDY13P   | 0          | 0        |
| CDY14P   | 0          | 0        |
| CDY15P   | 0          | 0        |
| CDY16P   | 0          | 0        |
| CDY17P   | 0          | 0        |
| CDY18P   | 0          | 0        |
| CDY19P   | 0          | 0        |
| CDY1B    | 0          | 0        |
| CDY20P   | 0          | 0        |
| CDY21P   | 0          | 0        |
| CDY22P   | 0          | 0        |
| CDY23P   | 0          | 0        |
| CDY24P   | 0          | 0        |
| CDY2A    | 0          | 0        |
| CDY2B    | 0          | 0        |
| CDY3P    | 0          | 0        |
| CDY4P    | 0          | 0        |
| CDY5P    | 0          | 0        |
| CDY6P    | 0          | 0        |
| CDY7P    | 0          | 0        |
| CDY8P    | 0          | 0        |
| CDY9P    | 0          | 0        |
| CDYL     | 6.60527865 | 6.242628 |
| CDYL2    | 2.70809272 | 3.033708 |
| CEACAM1  | 9.47552805 | 7.239982 |
| CEACAM16 | 0          | 0        |
| CEACAM18 | 0.08782511 | 0.059862 |
| CEACAM19 | 0.00935291 | 0.010625 |
| CEACAM20 | 0          | 0        |
| CEACAM21 | 4.20816043 | 4.88599  |
| CEACAM3  | 0.38360725 | 0.228268 |
| CEACAM4  | 0.50600382 | 0.277503 |
| CEACAM5  | 0.01752111 | 0.01327  |
| CEACAM6  | 0.00799138 | 0.018157 |
| CEACAM7  | 0          | 0        |
| CEACAM8  | 0.00912954 | 0        |
| CEACAMP1 | 0          | 0        |

|           |            |          |
|-----------|------------|----------|
| CEACAMP10 | 0          | 0        |
| CEACAMP11 | 0          | 0        |
| CEACAMP2  | 0          | 0        |
| CEACAMP3  | 0          | 0        |
| CEACAMP4  | 0          | 0        |
| CEACAMP5  | 0          | 0        |
| CEACAMP6  | 0          | 0        |
| CEACAMP7  | 0          | 0        |
| CEACAMP8  | 0          | 0        |
| CEACAMP9  | 0          | 0        |
| CEBPA     | 0.02644696 | 0.070103 |
| CEBPB     | 61.9543367 | 78.19545 |
| CEBPD     | 16.9916943 | 19.47467 |
| CEBPE     | 238.263742 | 334.9484 |
| CEBPG     | 4.18142958 | 4.37297  |
| CEBPZ     | 9.79287938 | 9.353208 |
| CECR1     | 1.32319972 | 1.142177 |
| CECR2     | 0.00372988 | 0.004237 |
| CECR4     | 0          | 0        |
| CECR5     | 0.22367373 | 0.228687 |
| CECR6     | 0          | 0        |
| CECR7     | 0          | 0        |
| CECR8     | 0          | 0        |
| CEL       | 0.32631596 | 0.320605 |
| CELA1     | 0.08834173 | 0.100358 |
| CELA3A    | 0          | 0.026334 |
| CELA3B    | 0          | 0        |
| CELP      | 0          | 0        |
| CELSR1    | 0.01661498 | 0.029361 |
| CELSR2    | 0.01196888 | 0.013597 |
| CELSR3    | 0.04745728 | 0.019967 |
| CEMP1     | 22.7284581 | 21.40243 |
| CEND1     | 0.03832077 | 0        |
| CENPA     | 0          | 0        |
| CENPB     | 13.2000581 | 16.96347 |
| CENPC1    | 14.0817609 | 15.55492 |
| CENPC2    | 0          | 0        |
| CENPE     | 0.13671836 | 0.116486 |
| CENPF     | 0.0959781  | 0.132231 |
| CENPH     | 0.57520704 | 0.412702 |
| CENPI     | 0.02461022 | 0        |
| CENPJ     | 1.40223066 | 1.579104 |
| CENPK     | 0.37653683 | 0.372558 |
| CENPL     | 0.74807883 | 0.604686 |
| CENPM     | 0.04159314 | 0.023625 |
| CENPN     | 0.58205718 | 0.553271 |
| CENPO     | 0.27171197 | 0.264574 |

|         |            |          |
|---------|------------|----------|
| CENPP   | 0.33792905 | 0.432752 |
| CENPQ   | 2.57949662 | 2.059538 |
| CENPT   | 5.95344126 | 5.215    |
| CENPV   | 24.8004978 | 27.72232 |
| CEP110  | 20.9291311 | 16.80411 |
| CEP120  | 8.83360602 | 7.56847  |
| CEP135  | 2.89608174 | 2.439061 |
| CEP152  | 3.85691278 | 2.863214 |
| CEP164  | 2.2415065  | 1.880082 |
| CEP170  | 13.2056799 | 13.30666 |
| CEP170L | 0          | 0        |
| CEP192  | 9.68757703 | 8.979857 |
| CEP250  | 2.32215562 | 1.831154 |
| CEP290  | 1.23429661 | 1.146966 |
| CEP350  | 11.8767495 | 11.21301 |
| CEP55   | 0.00791021 | 0.008986 |
| CEP57   | 14.114535  | 12.69889 |
| CEP63   | 4.90788535 | 3.467822 |
| CEP68   | 0.58822147 | 0.566365 |
| CEP70   | 0.17369781 | 0.134539 |
| CEP72   | 0.19145583 | 0.237269 |
| CEP76   | 1.56828889 | 1.781601 |
| CEP78   | 0.47402564 | 0.34742  |
| CEP97   | 1.27744019 | 0.817649 |
| CEPT1   | 5.85628895 | 5.879725 |
| CER1    | 0          | 0        |
| CERCAM  | 0.0547331  | 0.10659  |
| CERK    | 38.3280668 | 59.62411 |
| CERKL   | 2.12158135 | 1.455044 |
| CES1    | 0.29245368 | 0.344097 |
| CES2    | 5.52428173 | 4.755215 |
| CES3    | 0.11353354 | 0.079842 |
| CES4    | 0          | 0        |
| CES7    | 0          | 0.010987 |
| CES8    | 0.13787102 | 0.190186 |
| CETN1   | 0          | 0        |
| CETN2   | 8.60481137 | 9.310769 |
| CETN3   | 2.2267153  | 1.897188 |
| CETP    | 0.07347233 | 0.055644 |
| CFB     | 0.00800355 | 0.009092 |
| CFC1    | 0          | 0        |
| CFC1B   | 0.01812529 | 0        |
| CFD     | 182.882738 | 187.1102 |
| CFDP1   | 6.7399419  | 6.14402  |
| CFH     | 0.00960938 | 0        |
| CFHR1   | 0.01621074 | 0        |
| CFHR2   | 0          | 0        |

|          |            |          |
|----------|------------|----------|
| CFHR3    | 0          | 0        |
| CFHR4    | 0          | 0        |
| CFHR5    | 0          | 0        |
| CFI      | 0          | 0        |
| CFL1     | 370.729983 | 354.4854 |
| CFL2     | 1.57394867 | 1.504926 |
| CFLAR    | 23.9187952 | 20.87562 |
| CFLP1    | 0          | 0        |
| CFLP2    | 0          | 0        |
| CFLP3    | 0          | 0        |
| CFLP4    | 0          | 0        |
| CFLP5    | 0          | 0        |
| CFP      | 1.3740498  | 1.184163 |
| CFTR     | 0          | 0        |
| CG030    | 0          | 0        |
| CGA      | 0.59731054 | 0.305349 |
| CGB      | 0          | 0        |
| CGB1     | 0          | 0        |
| CGB2     | 0          | 0        |
| CGB5     | 0          | 0        |
| CGB7     | 0.02389242 | 0        |
| CGB8     | 0.02370387 | 0        |
| CGGBP1   | 26.7043474 | 26.95823 |
| CGI-148P | 0          | 0        |
| CGN      | 0.004121   | 0.014045 |
| CGNL1    | 0.01175092 | 0.003337 |
| CGREF1   | 0.02275469 | 0.012925 |
| CGRRF1   | 4.33856036 | 4.224577 |
| CH25H    | 0          | 0        |
| CHAC1    | 0          | 0.015311 |
| CHAC2    | 0          | 0        |
| CHAD     | 0.01240433 | 0.014092 |
| CHADL    | 0.06640452 | 0.00943  |
| CHAF1A   | 2.15096117 | 1.750479 |
| CHAF1B   | 0.5904437  | 0.524026 |
| CHAT     | 0          | 0.008756 |
| CHCHD1   | 12.2564726 | 11.40486 |
| CHCHD10  | 3.05206417 | 3.046927 |
| CHCHD2   | 68.3645731 | 68.07989 |
| CHCHD3   | 5.3914485  | 5.001647 |
| CHCHD4   | 1.99242538 | 1.533769 |
| CHCHD5   | 5.59217569 | 5.501028 |
| CHCHD6   | 0.08890203 | 0.302982 |
| CHCHD7   | 13.5474996 | 12.43901 |
| CHCHD8   | 3.2940543  | 3.478982 |
| CHCHD9   | 0          | 0        |
| CHD1     | 29.2505108 | 27.82465 |

|            |            |          |
|------------|------------|----------|
| CHD1L      | 5.44143947 | 4.554835 |
| CHD2       | 60.2297787 | 57.44768 |
| CHD3       | 20.9423799 | 28.81667 |
| CHD4       | 45.3806705 | 44.70048 |
| CHD5       | 0.01089847 | 0.009905 |
| CHD6       | 11.1876051 | 10.08145 |
| CHD7       | 29.4845842 | 31.95125 |
| CHD8       | 22.536252  | 21.07699 |
| CHD9       | 7.69510237 | 10.15253 |
| CHDH       | 0.01154604 | 0        |
| CHEK1      | 0.18198123 | 0.169817 |
| CHEK2      | 0.33860624 | 0.264455 |
| CHERP      | 10.6025173 | 10.58644 |
| CHFR       | 30.4123573 | 30.35494 |
| CHGA       | 0.0102914  | 0.09353  |
| CHGB       | 0.0079281  | 0        |
| CHI3L1     | 0.01144547 | 0.026004 |
| CHI3L2     | 0.03915332 | 0.029653 |
| CHIA       | 0.01247794 | 0.014175 |
| CHIC1      | 0.06999314 | 0.044942 |
| CHIC2      | 34.7618805 | 43.20551 |
| CHID1      | 0.66650905 | 0.588211 |
| CHIT1      | 0.06379598 | 0.041413 |
| CHKA       | 16.4596536 | 21.22144 |
| CHKB       | 8.59208236 | 6.956921 |
| CHKB-CPT1B | 0          | 0        |
| CHL1       | 0.00549682 | 0.003122 |
| CHM        | 0.74200815 | 0.63521  |
| CHML       | 0.00297514 | 0.00338  |
| CHMP1A     | 40.4079184 | 40.23449 |
| CHMP1B     | 0.22674377 | 0.312224 |
| CHMP2A     | 42.7032425 | 39.12895 |
| CHMP2B     | 20.2652828 | 17.87748 |
| CHMP4A     | 21.4863515 | 22.72656 |
| CHMP4B     | 71.7304563 | 81.35546 |
| CHMP4C     | 0          | 0        |
| CHMP5      | 25.5376798 | 24.15242 |
| CHMP6      | 9.07222814 | 7.665053 |
| CHMP7      | 11.1539072 | 10.33154 |
| CHN1       | 0.05426892 | 0.026422 |
| CHN2       | 0.18587136 | 0.16147  |
| CHODL      | 0.01652285 | 0.028155 |
| CHORDC1    | 4.9131571  | 4.882864 |
| CHORDC2P   | 0          | 0        |
| CHP        | 44.7976247 | 40.64905 |
| CHP2       | 0.00888645 | 0        |
| CHPF       | 0.48503773 | 0.598925 |

|            |            |          |
|------------|------------|----------|
| CHPT1      | 127.131468 | 136.6039 |
| CHRAC1     | 9.4529888  | 9.850219 |
| CHRD       | 0.00597141 | 0        |
| CHRD1      | 0.00505538 | 0        |
| CHRD2      | 0.01252999 | 0        |
| CHRFAM7A   | 5.99567695 | 5.565949 |
| CHRFAM7AP1 | 0          | 0        |
| CHRFAM7AP2 | 0          | 0        |
| CHRM1      | 0.00744787 | 0        |
| CHRM2      | 0          | 0        |
| CHRM3      | 0.04590684 | 0.034767 |
| CHRM4      | 0.20051406 | 0.276599 |
| CHRM5      | 0.13837006 | 0.070736 |
| CHRNA1     | 0          | 0        |
| CHRNA10    | 2.57276543 | 2.861301 |
| CHRNA2     | 0.01033948 | 0.017619 |
| CHRNA3     | 0.01402156 | 0.015929 |
| CHRNA4     | 0.00383184 | 0        |
| CHRNA5     | 0.06061669 | 0.137723 |
| CHRNA6     | 0          | 0        |
| CHRNA7     | 1.1427863  | 1.254216 |
| CHRNA9     | 0.03333826 | 0.075746 |
| CHRNA1     | 2.03610099 | 1.646573 |
| CHRNA2     | 0.036764   | 0.025059 |
| CHRNA3     | 0          | 0        |
| CHRNA4     | 0.00858878 | 0        |
| CHRNA5     | 0.02415317 | 0.013719 |
| CHRNA6     | 1.79484533 | 1.815657 |
| CHRNA7     | 0.00961378 | 0.032764 |
| CHST1      | 0.00773559 | 0.008788 |
| CHST10     | 0.01493807 | 0.01697  |
| CHST11     | 59.9705566 | 53.07641 |
| CHST12     | 10.5779615 | 8.787164 |
| CHST13     | 25.4746247 | 30.5603  |
| CHST14     | 5.67350201 | 5.352405 |
| CHST2      | 0.09673172 | 0.070643 |
| CHST3      | 0.0060305  | 0.003425 |
| CHST4      | 0          | 0.011889 |
| CHST5      | 0.02587733 | 0.007349 |
| CHST6      | 0.00610758 | 0.006938 |
| CHST7      | 0.1000773  | 0.093019 |
| CHST8      | 0.00725512 | 0.008242 |
| CHST9      | 0          | 0.002096 |
| CHSY1      | 86.2293562 | 116.7079 |
| CHSY3      | 0          | 0.00684  |
| CHTF18     | 6.2667734  | 6.315254 |
| CHTF8      | 12.8480294 | 12.55972 |

|          |            |          |
|----------|------------|----------|
| CHTF8P   | 0          | 0        |
| CHUK     | 9.83250438 | 8.885749 |
| CHURC1   | 9.24716567 | 9.183863 |
| CIAO1    | 15.5057277 | 16.47737 |
| CIAPIN1  | 5.91025448 | 5.375851 |
| CIAPIN1P | 0          | 0        |
| CIB1     | 213.244631 | 331.4823 |
| CIB2     | 0.0407731  | 0.030879 |
| CIB3     | 0.85882592 | 0.686561 |
| CIB4     | 0          | 0        |
| CIC      | 19.5847135 | 16.47475 |
| CICP1    | 0          | 0        |
| CICP2    | 0          | 0        |
| CIDEA    | 0.01525786 | 0        |
| CIDEB    | 12.4257643 | 11.89994 |
| CIDEC    | 0.29636332 | 0.243153 |
| CIDECP   | 0          | 0        |
| CIITA    | 6.02208126 | 6.718008 |
| CILP     | 0.01882304 | 0.032075 |
| CILP2    | 0.01001445 | 0        |
| CINP     | 6.46437653 | 5.147863 |
| CIR      | 26.4429009 | 25.76341 |
| CIRBP    | 221.255111 | 205.665  |
| CIRH1A   | 1.39920126 | 1.366983 |
| CISD1    | 0.06079614 | 0.080576 |
| CISD1B   | 0          | 0        |
| CISD2    | 17.9286654 | 19.3028  |
| CISD3    | 0.17547697 | 0.217467 |
| CISH     | 5.16362846 | 10.89995 |
| CIT      | 0.02206483 | 0.038992 |
| CITED1   | 0.09101875 | 0.059085 |
| CITED2   | 63.1631445 | 76.3581  |
| CITED4   | 1.0423092  | 1.424596 |
| CIZ1     | 10.0776586 | 9.598969 |
| CKAP2    | 7.29921152 | 8.253661 |
| CKAP2L   | 0.70020198 | 1.269786 |
| CKAP4    | 12.521014  | 13.42947 |
| CKAP5    | 2.95070336 | 2.289376 |
| CKB      | 25.4184644 | 30.61166 |
| CKBP1    | 0          | 0        |
| CKLF     | 158.919387 | 142.3416 |
| CKM      | 0          | 0        |
| CKMT1A   | 0          | 0        |
| CKMT1B   | 0          | 0.013426 |
| CKMT2    | 0.06386796 | 0.029022 |
| CKS1A    | 0          | 0        |
| CKS1B    | 0.10306535 | 0.146355 |



|         |            |          |
|---------|------------|----------|
| CKS1BP  | 0          | 0        |
| CKS1BP2 | 0          | 0        |
| CKS1BP3 | 0          | 0        |
| CKS2    | 5.55644962 | 3.974358 |
| CLASP1  | 13.1808678 | 15.01475 |
| CLASP2  | 7.12330453 | 6.904675 |
| CLC     | 607.698812 | 309.1795 |
| CLCA1   | 0.01346483 | 0.030593 |
| CLCA2   | 0          | 0        |
| CLCA3P  | 0          | 0        |
| CLCA4   | 0          | 0        |
| CLCC1   | 6.09234512 | 6.604838 |
| CLCF1   | 37.7930895 | 52.32162 |
| CLCN1   | 0.00679771 | 0.007722 |
| CLCN2   | 0.13895001 | 0.099694 |
| CLCN3   | 6.12957686 | 4.716882 |
| CLCN4   | 0.04026061 | 0.045737 |
| CLCN5   | 0.17131902 | 0.125114 |
| CLCN6   | 2.02295367 | 1.710907 |
| CLCN7   | 19.1741066 | 19.80344 |
| CLCNKA  | 0.00829075 | 0.009418 |
| CLCNKB  | 0.01622325 | 0        |
| CLCP1   | 0          | 0        |
| CLDN1   | 0          | 0        |
| CLDN10  | 0          | 0        |
| CLDN11  | 0.34268015 | 0.354687 |
| CLDN12  | 0.06667012 | 0.061968 |
| CLDN14  | 0          | 0.035774 |
| CLDN15  | 7.85525084 | 7.214898 |
| CLDN16  | 0          | 0        |
| CLDN17  | 0          | 0        |
| CLDN18  | 0.02315565 | 0.006576 |
| CLDN19  | 0.00583713 | 0.013262 |
| CLDN2   | 0          | 0        |
| CLDN20  | 0          | 0        |
| CLDN22  | 0          | 0        |
| CLDN23  | 0.73243981 | 0.685229 |
| CLDN24  | 0          | 0        |
| CLDN3   | 0          | 0        |
| CLDN4   | 0.01153337 | 0.013102 |
| CLDN5   | 0          | 0        |
| CLDN6   | 0.03069391 | 0.034869 |
| CLDN7   | 0.01365281 | 0        |
| CLDN8   | 0          | 0        |
| CLDN9   | 3.81275681 | 3.885683 |
| CLDND1  | 18.1965886 | 15.93593 |
| CLDND2  | 0.34538531 | 0.245227 |

|          |            |          |
|----------|------------|----------|
| CLEC10A  | 0.01181198 | 0        |
| CLEC11A  | 0.04483013 | 0.033952 |
| CLEC12A  | 46.0934748 | 29.09222 |
| CLEC12B  | 2.09051862 | 1.665133 |
| CLEC14A  | 0          | 0.021175 |
| CLEC16A  | 2.93518624 | 2.894219 |
| CLEC17A  | 5.5302098  | 3.972874 |
| CLEC18A  | 0.49471367 | 0.647525 |
| CLEC18B  | 0.46530583 | 0.528595 |
| CLEC18C  | 0.65103817 | 0.448604 |
| CLEC1A   | 0          | 0        |
| CLEC1B   | 0.23794099 | 0.147439 |
| CLEC2A   | 0          | 0        |
| CLEC2B   | 15.1654742 | 10.52445 |
| CLEC2D   | 2.3873304  | 2.502726 |
| CLEC2L   | 0.03264803 | 0        |
| CLEC3A   | 0.0108658  | 0        |
| CLEC3B   | 0.86371665 | 1.317606 |
| CLEC4A   | 2.83948654 | 2.218835 |
| CLEC4C   | 0.03200203 | 0.018177 |
| CLEC4D   | 0          | 0.049349 |
| CLEC4E   | 0.00974297 | 0.022136 |
| CLEC4F   | 0.00849508 | 0.009651 |
| CLEC4G   | 0          | 0        |
| CLEC4GP1 | 0          | 0        |
| CLEC4M   | 0          | 0        |
| CLEC5A   | 0.00598842 | 0.040818 |
| CLEC6A   | 0          | 0        |
| CLEC7A   | 0.83116242 | 0.638219 |
| CLEC9A   | 0          | 0.014277 |
| CLECL1   | 0.03311076 | 0.037614 |
| CLGN     | 0.11175761 | 0.126958 |
| CLIC1    | 227.21139  | 242.1542 |
| CLIC2    | 0.14872721 | 0.133387 |
| CLIC3    | 0.4913669  | 2.02715  |
| CLIC4    | 2.44204904 | 3.40985  |
| CLIC5    | 0.00992229 | 0        |
| CLIC6    | 0.07746175 | 0.018857 |
| CLINT1   | 52.081433  | 44.46466 |
| CLIP1    | 5.05251576 | 5.134486 |
| CLIP2    | 0.66897062 | 1.236547 |
| CLIP3    | 0.0816152  | 0.085584 |
| CLIP4    | 0.10323403 | 0.067015 |
| CLK1     | 142.375029 | 141.3361 |
| CLK2     | 20.5924276 | 17.54779 |
| CLK2P    | 0          | 0        |
| CLK3     | 32.9328067 | 29.65886 |

|         |            |          |
|---------|------------|----------|
| CLK4    | 27.1140387 | 25.69531 |
| CLLU1   | 0          | 0.006129 |
| CLLU1OS | 0          | 0        |
| CLMN    | 0.40401616 | 0.391528 |
| CLN3    | 138.364124 | 162.97   |
| CLN5    | 9.8894146  | 10.56063 |
| CLN6    | 1.44420204 | 1.171883 |
| CLN8    | 3.71880592 | 4.627761 |
| CLNK    | 0          | 0        |
| CLNS1A  | 3.93554993 | 3.635825 |
| CLNS1B  | 0          | 0        |
| CLOCK   | 0.34794549 | 0.251162 |
| CLP1    | 9.28258111 | 9.471235 |
| CLPB    | 0.52630803 | 0.398596 |
| CLPP    | 5.62623974 | 4.75212  |
| CLPS    | 0          | 0        |
| CLPSMCR | 0          | 0        |
| CLPTM1  | 28.7065171 | 27.43547 |
| CLPTM1L | 28.1903879 | 28.15507 |
| CLPX    | 16.052943  | 15.38156 |
| CLRN1   | 0          | 0        |
| CLRN1OS | 0          | 0        |
| CLRN2   | 0          | 0        |
| CLRN3   | 0.09197433 | 0.062691 |
| CLSPN   | 0.40331761 | 0.425448 |
| CLSTN1  | 12.3957123 | 12.27838 |
| CLSTN2  | 0          | 0.004892 |
| CLSTN3  | 8.74440004 | 8.856477 |
| CLTA    | 27.5583274 | 28.76615 |
| CLTB    | 44.0750603 | 56.32367 |
| CLTC    | 22.540626  | 20.75428 |
| CLTCL1  | 0.10674692 | 0.103942 |
| CLU     | 0.13486421 | 0.176189 |
| CLUAP1  | 0.4173763  | 0.49108  |
| CLUL1   | 0          | 0.011937 |
| CLYBL   | 0.01889068 | 0.04292  |
| CMA1    | 0          | 0        |
| CMAH    | 0          | 0        |
| CMAS    | 11.8350513 | 9.973851 |
| CMBL    | 0.01039058 | 0.011804 |
| CMC1    | 1.04119051 | 1.144654 |
| CMIP    | 89.2887861 | 97.29615 |
| CMKLR1  | 0.04494193 | 0.034036 |
| CMPK1   | 19.1883055 | 19.44232 |
| CMPK2   | 11.9159955 | 14.89523 |
| CMTM1   | 15.2706339 | 16.47175 |
| CMTM2   | 3.61960072 | 3.774881 |

|          |            |          |
|----------|------------|----------|
| CMTM3    | 21.8270231 | 22.98522 |
| CMTM4    | 0.40149394 | 0.523783 |
| CMTM5    | 0.03504222 | 0        |
| CMTM6    | 114.789812 | 121.008  |
| CMTM7    | 17.0568192 | 18.33372 |
| CMTM8    | 6.86468071 | 8.043362 |
| CMYA5    | 0.02120147 | 0.025938 |
| CN5H6.4  | 0          | 0        |
| CNBD1    | 0          | 0        |
| CNBP     | 69.9974523 | 62.26786 |
| CNDP1    | 0.03826266 | 0.010867 |
| CNDP2    | 12.6167896 | 11.2241  |
| CNFN     | 0.07964141 | 0.135711 |
| CNGA1    | 0.00695973 | 0.007906 |
| CNGA2    | 0          | 0        |
| CNGA3    | 0          | 0        |
| CNGA4    | 0.03314556 | 0.025103 |
| CNGB1    | 0.00663364 | 0.011304 |
| CNGB3    | 0.00967349 | 0.005495 |
| CNIH     | 1.58096304 | 1.980635 |
| CNIH2    | 0.93270265 | 1.077524 |
| CNIH3    | 0          | 0.01007  |
| CNIH4    | 24.3880253 | 17.94277 |
| CNKSR1   | 0.13265193 | 0.113021 |
| CNKSR2   | 1.416214   | 1.048295 |
| CNKSR3   | 0.23448324 | 0.044396 |
| CNN1     | 0          | 0.01506  |
| CNN2     | 279.12025  | 324.1398 |
| CNN3     | 0.01017683 | 0.011561 |
| CNNM1    | 0.00705666 | 0        |
| CNNM2    | 1.03912721 | 0.976366 |
| CNNM3    | 12.8136476 | 12.75395 |
| CNNM4    | 3.71009486 | 3.572814 |
| CNO      | 9.99587209 | 9.934104 |
| CNOT1    | 34.3414544 | 32.14111 |
| CNOT10   | 11.8588696 | 13.77685 |
| CNOT2    | 20.4291859 | 21.58398 |
| CNOT3    | 19.2063268 | 18.39697 |
| CNOT4    | 6.31561275 | 5.85464  |
| CNOT6    | 12.415703  | 12.3293  |
| CNOT6L   | 16.9943203 | 18.93372 |
| CNOT6LP1 | 0          | 0        |
| CNOT7    | 13.9972007 | 13.61317 |
| CNOT8    | 42.6942081 | 36.29421 |
| CNP      | 5.16171472 | 4.669992 |
| CNPY1    | 0          | 0        |
| CNPY2    | 5.30415711 | 4.820485 |

|          |            |          |
|----------|------------|----------|
| CNPY3    | 79.9200824 | 85.33683 |
| CNPY4    | 2.33138024 | 1.527347 |
| CNR1     | 0.97559994 | 0.973032 |
| CNR2     | 148.729045 | 110.7327 |
| CNRIP1   | 0.08184601 | 0.020662 |
| CNTD1    | 0.08340839 | 0.087465 |
| CNTD2    | 0          | 0.012486 |
| CNTF     | 0.35523262 | 0.390939 |
| CNTFR    | 0.01031665 | 0        |
| CNTLN    | 0.0182571  | 0.023333 |
| CNTN1    | 0.0245408  | 0        |
| CNTN2    | 0.01651853 | 0.003128 |
| CNTN3    | 0          | 0        |
| CNTN4    | 0.02302044 | 0.017434 |
| CNTN5    | 0.00504931 | 0.011472 |
| CNTN6    | 0          | 0        |
| CNTNAP1  | 0.28912721 | 0.345971 |
| CNTNAP2  | 0.00425184 | 0.002415 |
| CNTNAP3  | 3.87615587 | 2.813775 |
| CNTNAP4  | 0.00426045 | 0        |
| CNTNAP5  | 0.01591622 | 0.00452  |
| CNTROB   | 4.79143    | 4.263159 |
| COASY    | 19.9464754 | 19.09499 |
| COBL     | 0.01187872 | 0.008996 |
| COBLL1   | 0.02989586 | 0.019407 |
| COBRA1   | 19.3701802 | 19.40781 |
| COCH     | 0.01459079 | 0        |
| COG1     | 13.5712103 | 11.12015 |
| COG2     | 6.4851781  | 5.422565 |
| COG3     | 9.4431038  | 9.1874   |
| COG4     | 7.51756164 | 6.254818 |
| COG5     | 7.36820006 | 7.376284 |
| COG6     | 1.98740881 | 1.93077  |
| COG7     | 3.44913153 | 3.395832 |
| COG8     | 6.18540799 | 5.973671 |
| COIL     | 3.44036357 | 3.790424 |
| COILP1   | 0          | 0        |
| COILP2   | 0          | 0        |
| COL10A1  | 0          | 0        |
| COL11A1  | 0.00282447 | 0        |
| COL11A2  | 0.21270763 | 0.260227 |
| COL11A2P | 0          | 0        |
| COL12A1  | 0.01089489 | 0.004126 |
| COL13A1  | 0.01330296 | 0.007556 |
| COL14A1  | 0.0032552  | 0.007396 |
| COL15A1  | 0.6140529  | 0.534505 |
| COL16A1  | 0.00376528 | 0.012832 |

|          |            |          |
|----------|------------|----------|
| COL17A1  | 0.01499132 | 0.01703  |
| COL18A1  | 13.5789893 | 15.72301 |
| COL19A1  | 0.00722934 | 0.016425 |
| COL1A1   | 0.19155861 | 0.225673 |
| COL1A2   | 0          | 0        |
| COL20A1  | 0.02519814 | 0.01145  |
| COL21A1  | 0.01007684 | 0.005724 |
| COL22A1  | 0.00662633 | 0        |
| COL23A1  | 0.03432147 | 0.054586 |
| COL24A1  | 0.00646933 | 0.014699 |
| COL25A1  | 0.00723764 | 0        |
| COL27A1  | 0.00753191 | 0        |
| COL28A1  | 0.02990801 | 0.01359  |
| COL29A1  | 0.00236825 | 0.00269  |
| COL2A1   | 0.0165326  | 0.018781 |
| COL3A1   | 0.00382975 | 0        |
| COL4A1   | 1.3647796  | 1.206688 |
| COL4A2   | 0.0100696  | 0.003813 |
| COL4A3   | 0.01817902 | 0.023602 |
| COL4A3BP | 13.7050128 | 12.39322 |
| COL4A4   | 0.03456442 | 0.025407 |
| COL4A5   | 0.00652454 | 0        |
| COL4A6   | 0.00617031 | 0.003505 |
| COL5A1   | 0.00996579 | 0.005661 |
| COL5A2   | 0.00910187 | 0        |
| COL5A3   | 0.00340546 | 0.007737 |
| COL6A1   | 0.39313637 | 0.407036 |
| COL6A2   | 0.06295009 | 0.016503 |
| COL6A3   | 0.00198708 | 0.002257 |
| COL6A6   | 0.00744699 | 0.00282  |
| COL7A1   | 0.12611988 | 0.182349 |
| COL8A1   | 0.00791021 | 0.017972 |
| COL8A2   | 0.00946447 | 0.016128 |
| COL9A1   | 0.00524322 | 0.011913 |
| COL9A2   | 34.7055357 | 36.26217 |
| COL9A3   | 6.51489128 | 7.977723 |
| COLEC10  | 0.01247054 | 0        |
| COLEC11  | 0          | 0.017271 |
| COLEC12  | 0          | 0        |
| COLQ     | 0.14366685 | 0.149016 |
| COMMD1   | 1.71033548 | 1.976468 |
| COMMD10  | 3.01205584 | 2.851453 |
| COMMD2   | 6.17176148 | 5.233254 |
| COMMD3   | 17.6915047 | 17.42149 |
| COMMD4   | 8.9329244  | 8.237135 |
| COMMD5   | 9.14312557 | 8.063964 |
| COMMD6   | 5.77525061 | 5.42339  |

|         |            |          |
|---------|------------|----------|
| COMMD7  | 9.94604876 | 10.09899 |
| COMMD8  | 10.1316094 | 7.910775 |
| COMMD9  | 4.27717728 | 4.152186 |
| COMP    | 0          | 0.009741 |
| COMT    | 3.25303789 | 3.65808  |
| COMTD1  | 1.35855985 | 1.567843 |
| COPA    | 46.1807702 | 45.35894 |
| COPB1   | 28.7511118 | 27.83323 |
| COPB2   | 28.5117761 | 26.86788 |
| COPE    | 73.4959541 | 77.17376 |
| COPG    | 25.8199819 | 23.79187 |
| COPG2   | 1.58170142 | 1.411801 |
| COPS2   | 5.65554789 | 4.947962 |
| COPS3   | 16.0131799 | 11.63596 |
| COPS4   | 9.93531085 | 9.74261  |
| COPS5   | 24.9622889 | 23.88511 |
| COPS5P  | 0          | 0        |
| COPS6   | 13.092913  | 12.0263  |
| COPS7A  | 13.5171209 | 12.04235 |
| COPS7B  | 10.9859215 | 10.26927 |
| COPS8   | 6.96922292 | 7.053459 |
| COPZ1   | 16.8357816 | 16.28015 |
| COPZ2   | 0.02328387 | 0.026451 |
| COQ10A  | 1.5608833  | 1.20418  |
| COQ10B  | 13.9529805 | 12.93474 |
| COQ2    | 9.39167904 | 9.877067 |
| COQ3    | 0.19944978 | 0.283223 |
| COQ4    | 2.05973344 | 2.41586  |
| COQ5    | 1.49086177 | 1.297932 |
| COQ6    | 4.86517707 | 3.957066 |
| COQ7    | 2.94907076 | 2.482649 |
| COQ9    | 7.74138114 | 6.045179 |
| CORIN   | 0.01276325 | 0.014499 |
| CORO1A  | 1660.45604 | 1575.193 |
| CORO1B  | 12.6906741 | 15.10274 |
| CORO1C  | 23.3841361 | 26.06388 |
| CORO2A  | 9.96686118 | 11.85338 |
| CORO2B  | 0          | 0        |
| CORO6   | 3.70732366 | 3.275672 |
| CORO7   | 122.562003 | 131.7895 |
| CORT    | 0          | 0.025546 |
| COTL1   | 1364.7822  | 1467.254 |
| COTL1P2 | 0          | 0        |
| COX1    | 0          | 0        |
| COX10   | 0.65135103 | 0.644468 |
| COX11   | 2.15464916 | 1.758467 |
| COX11P  | 0          | 0        |

|          |            |          |
|----------|------------|----------|
| COX15    | 4.50913913 | 3.889213 |
| COX16    | 1.75517941 | 1.3804   |
| COX17    | 28.0834799 | 27.2166  |
| COX17P   | 0          | 0        |
| COX18    | 3.16100488 | 2.714337 |
| COX19    | 7.67332156 | 9.732779 |
| COX2     | 0          | 0        |
| COX3     | 0          | 0        |
| COX4I1   | 89.8164387 | 87.94604 |
| COX4I2   | 0          | 0        |
| COX4NB   | 6.21981532 | 6.99284  |
| COX5A    | 18.0763235 | 18.95299 |
| COX5AP1  | 0          | 0        |
| COX5AP2  | 0          | 0        |
| COX5B    | 70.7367075 | 68.01344 |
| COX5BL1  | 0          | 0        |
| COX5BL7  | 0          | 0        |
| COX6A1   | 68.8311017 | 66.73011 |
| COX6A1P  | 0          | 0        |
| COX6A1P2 | 0          | 0        |
| COX6A2   | 0          | 0        |
| COX6B1   | 57.8761799 | 53.7629  |
| COX6B2   | 0.02528603 | 0.043088 |
| COX6BP1  | 0          | 0        |
| COX6BP2  | 0          | 0        |
| COX6BP3  | 0          | 0        |
| COX6C    | 27.1103091 | 22.92971 |
| COX6CP1  | 0          | 0        |
| COX6CP2  | 0          | 0        |
| COX7A1   | 0          | 0.031345 |
| COX7A2   | 60.8839903 | 56.56197 |
| COX7A2L  | 13.9666925 | 11.8891  |
| COX7AP1  | 0          | 0        |
| COX7AP2  | 0          | 0        |
| COX7B    | 40.0219019 | 36.87526 |
| COX7B2   | 0          | 0.050819 |
| COX7BP1  | 0          | 0        |
| COX7BP2  | 0          | 0        |
| COX7C    | 101.768801 | 93.31038 |
| COX7CP1  | 0          | 0        |
| COX8A    | 89.7827249 | 91.25337 |
| COX8B    | 0          | 0        |
| COX8C    | 0          | 0        |
| CP       | 0.01351822 | 0.010238 |
| CP110    | 7.85536625 | 7.730216 |
| CPA1     | 0          | 0        |
| CPA2     | 0          | 0.017959 |



|         |            |          |
|---------|------------|----------|
| CPA3    | 0.09976432 | 0.155834 |
| CPA4    | 0          | 0.008479 |
| CPA5    | 0.03038343 | 0.011505 |
| CPA6    | 0          | 0        |
| CPAMD8  | 0.02106747 | 0.015955 |
| CPB1    | 0          | 0        |
| CPB2    | 0.03571687 | 0.02705  |
| CPD     | 28.5944501 | 25.19767 |
| CPE     | 0          | 0.009837 |
| CPEB1   | 0          | 0        |
| CPEB2   | 10.1894575 | 12.87427 |
| CPEB3   | 1.89371988 | 2.674805 |
| CPEB4   | 16.6654638 | 17.14907 |
| CPLX1   | 0          | 0        |
| CPLX2   | 5.63772048 | 7.101633 |
| CPLX3   | 0.15674949 | 0.142456 |
| CPLX4   | 0.01069447 | 0        |
| CPM     | 0.07501233 | 0.099418 |
| CPN1    | 0.01197342 | 0        |
| CPN2    | 0          | 0        |
| CPNE1   | 58.4370964 | 53.69535 |
| CPNE2   | 2.2654529  | 2.551688 |
| CPNE3   | 6.46667252 | 5.072639 |
| CPNE4   | 0.00816201 | 0.009272 |
| CPNE5   | 0.14482858 | 0.300442 |
| CPNE6   | 0          | 0        |
| CPNE7   | 0.00791318 | 0.026969 |
| CPNE8   | 0.08504901 | 0.089716 |
| CPNE9   | 0.10261265 | 0.081599 |
| CPO     | 0          | 0        |
| CPOX    | 5.03203654 | 4.697257 |
| CPP     | 0          | 0        |
| CPPED1  | 7.44083827 | 6.011131 |
| CPS1    | 0.00683973 | 0.00777  |
| CPSF1   | 15.3923762 | 15.40786 |
| CPSF1P1 | 0          | 0        |
| CPSF2   | 7.63268313 | 7.282566 |
| CPSF3   | 6.11100131 | 5.225899 |
| CPSF3L  | 18.5141088 | 16.83704 |
| CPSF4   | 9.62605514 | 9.653456 |
| CPSF4L  | 0.38995977 | 0.2215   |
| CPSF6   | 11.4533393 | 13.1628  |
| CPSF7   | 44.7688292 | 41.82906 |
| CPT1A   | 47.5206979 | 53.77089 |
| CPT1B   | 6.8361911  | 6.457494 |
| CPT1C   | 0          | 0.025428 |
| CPT2    | 6.32662674 | 5.905659 |

|         |            |          |
|---------|------------|----------|
| CPVL    | 0.07091174 | 0.093983 |
| CPXCR1  | 0          | 0        |
| CPXM1   | 0          | 0.009994 |
| CPXM2   | 0.0112918  | 0.019241 |
| CPZ     | 0          | 0        |
| CR1     | 26.5675289 | 24.61609 |
| CR1L    | 0.801183   | 0.611105 |
| CR2     | 0.04057965 | 0.040337 |
| CRABP1  | 0          | 0        |
| CRABP2  | 1.19338824 | 1.109216 |
| CRADD   | 4.17323642 | 3.153879 |
| CRAMP1L | 8.29449717 | 8.056127 |
| CRAT    | 1.79263264 | 2.01997  |
| CRB1    | 0          | 0        |
| CRB2    | 0.0111817  | 0.038108 |
| CRB3    | 0.01897593 | 0.043114 |
| CRBN    | 24.138073  | 20.60931 |
| CRCP    | 20.7477936 | 21.76331 |
| CRCT1   | 0          | 0.034367 |
| CREB1   | 9.03235662 | 8.739229 |
| CREB3   | 5.72488752 | 5.806753 |
| CREB3L1 | 0          | 0        |
| CREB3L2 | 16.416962  | 19.9411  |
| CREB3L3 | 1.31001482 | 1.229381 |
| CREB3L4 | 0.61379043 | 0.492195 |
| CREB5   | 0.01191777 | 0.002708 |
| CREBBP  | 38.3783942 | 38.85751 |
| CREBL2  | 7.83681626 | 6.710518 |
| CREBZF  | 17.3551096 | 19.39848 |
| CREG1   | 52.7708825 | 35.07315 |
| CREG2   | 0.0060279  | 0.013696 |
| CRELD1  | 1.71043713 | 1.193844 |
| CRELD2  | 3.12376346 | 2.987534 |
| CREM    | 3.79088595 | 3.144255 |
| CRH     | 0          | 0.03735  |
| CRHBP   | 0.21734564 | 0.142947 |
| CRHR1   | 0          | 0.008966 |
| CRHR2   | 0.01241898 | 0.028216 |
| CRIM1   | 23.4162846 | 16.26275 |
| CRIP1   | 157.865193 | 180.0838 |
| CRIP2   | 0.4881503  | 0.950651 |
| CRIP3   | 0.10996512 | 0.049969 |
| CRIPAK  | 3.21318922 | 3.295425 |
| CRIPT   | 3.70519388 | 3.287627 |
| CRISP1  | 0          | 0        |
| CRISP2  | 0          | 0.016964 |
| CRISP3  | 0.0099788  | 0.022672 |

|                 |            |          |
|-----------------|------------|----------|
| CRISPLD1        | 0          | 0.005695 |
| CRISPLD2        | 0.0229084  | 0.015615 |
| CRK             | 12.0580055 | 11.88816 |
| CRKL            | 11.695217  | 10.45114 |
| CRKRS           | 10.8829548 | 10.53941 |
| CRLF1           | 0.04693154 | 0        |
| CRLF2 (NC_0000) | 0.34424345 | 0.120328 |
| CRLF2 (NC_0000) | 0.34424345 | 0.180492 |
| CRLF3           | 59.2369576 | 63.78567 |
| CRLS1           | 0.91481143 | 1.03924  |
| CRMP1           | 0.02997623 | 0.10216  |
| CRNKL1          | 12.9511458 | 11.93171 |
| CRNN            | 0          | 0        |
| CROCC           | 3.26309599 | 3.129179 |
| CROCCL1         | 0          | 0        |
| CROCCL2         | 0          | 0        |
| CROCCP          | 0          | 0        |
| CROP            | 53.1396132 | 50.09257 |
| CROT            | 1.20958982 | 0.920872 |
| CRP             | 0          | 0.011854 |
| CRPP1           | 0          | 0        |
| CRTAC1          | 0          | 0.008268 |
| CRTAM           | 0.01736196 | 0.049309 |
| CRTAP           | 2.49104808 | 2.398925 |
| CRTC1           | 1.45541479 | 1.448411 |
| CRTC2           | 62.1409917 | 59.44492 |
| CRTC3           | 7.73761455 | 6.596004 |
| CRX             | 0.00470681 | 0.016041 |
| CRY1            | 3.46550114 | 3.064449 |
| CRY2            | 9.24671721 | 9.088153 |
| CRYAA           | 0          | 0.021441 |
| CRYAB           | 0          | 0        |
| CRYBA1          | 0.10512665 | 0.179138 |
| CRYBA2          | 0          | 0.026989 |
| CRYBA4          | 0          | 0        |
| CRYBB1          | 0.02282881 | 0        |
| CRYBB2          | 1.24002607 | 0.59478  |
| CRYBB2P1        | 0          | 0        |
| CRYBB3          | 0          | 0.028001 |
| CRYBG3          | 0.03954608 | 0.009983 |
| CRYGA           | 0          | 0        |
| CRYGB           | 0          | 0        |
| CRYGC           | 0          | 0        |
| CRYGD           | 0          | 0        |
| CRYGEP1         | 0          | 0        |
| CRYGFP          | 0          | 0        |
| CRYGGP1         | 0          | 0        |

|                |            |          |
|----------------|------------|----------|
| CRYGN          | 0          | 0        |
| CRYGS          | 1.84783194 | 1.418356 |
| CRYL1          | 0.30816608 | 0.334169 |
| CRYM           | 0          | 0        |
| CRYZ           | 0.13682428 | 0.113985 |
| CRYZL1         | 5.30855814 | 3.741209 |
| CRYZP1         | 0          | 0        |
| CS             | 174.780129 | 139.7632 |
| CSAD           | 11.9130539 | 11.20252 |
| CSAG1          | 0          | 0        |
| CSAG2          | 0          | 0        |
| CSAG3          | 0          | 0        |
| CSDA           | 1.81069213 | 1.60928  |
| CSDAP1         | 0          | 0        |
| CSDC2          | 0.01662081 | 0        |
| CSDE1          | 119.224847 | 110.5531 |
| CSE1L          | 4.75889266 | 3.689079 |
| CSF1           | 60.8779424 | 80.34261 |
| CSF1R          | 0.45856199 | 0.461056 |
| CSF2           | 0          | 0        |
| CSF2RA (NC_000 | 1.18581042 | 1.52844  |
| CSF2RA (NC_000 | 20.4763667 | 18.09572 |
| CSF2RB         | 164.459896 | 125.1357 |
| CSF2RB2        | 0          | 0        |
| CSF3           | 0          | 0        |
| CSF3R          | 1.99072524 | 2.671972 |
| CSGALNACT1     | 2.08171594 | 1.9024   |
| CSGALNACT2     | 35.6030443 | 34.35248 |
| CSGLCA-T       | 37.0300035 | 38.8479  |
| CSH1           | 0          | 0        |
| CSH2           | 0          | 0        |
| CSHL1          | 0          | 0        |
| CSK            | 131.293216 | 143.0927 |
| CSMD1          | 0.00734125 | 0        |
| CSMD2          | 0.00641603 | 0.005467 |
| CSMD3          | 0.00157434 | 0        |
| CSN1S1         | 0          | 0        |
| CSN1S2A        | 0          | 0        |
| CSN1S2B        | 0          | 0        |
| CSN2           | 0          | 0        |
| CSN3           | 0          | 0        |
| CSNK1A1        | 30.2259998 | 28.71674 |
| CSNK1A1L       | 0          | 0.009931 |
| CSNK1A1P       | 0          | 0        |
| CSNK1D         | 89.1547986 | 92.63502 |
| CSNK1E         | 10.05085   | 9.988619 |
| CSNK1G1        | 6.28725136 | 6.214869 |

|          |            |          |
|----------|------------|----------|
| CSNK1G2  | 134.743059 | 170.3119 |
| CSNK1G3  | 1.09791621 | 0.915364 |
| CSNK2A1  | 20.098615  | 18.79815 |
| CSNK2A1P | 0          | 0        |
| CSNK2A2  | 7.05913764 | 6.565166 |
| CSNK2B   | 85.0705767 | 82.0733  |
| CSPG4    | 0.0177536  | 0.011525 |
| CSPG4P1Y | 0          | 0        |
| CSPG4P2Y | 0          | 0        |
| CSPG4P3Y | 0          | 0        |
| CSPG4P4Y | 0          | 0        |
| CSPG4P6Y | 0          | 0        |
| CSPG4P7Y | 0          | 0.026807 |
| CSPG5    | 0.03897188 | 0.055341 |
| CSPP1    | 0.98262392 | 0.795814 |
| CSRNP1   | 16.3493712 | 19.3823  |
| CSRNP2   | 8.98598839 | 8.834658 |
| CSRNP3   | 0          | 0        |
| CSRP1    | 6.86463733 | 7.070396 |
| CSRP2    | 0.07000665 | 0.02651  |
| CSRP2BP  | 0.83724563 | 0.517174 |
| CSRP2P   | 0          | 0        |
| CSRP3    | 0.04703653 | 0        |
| CST1     | 0          | 0        |
| CST11    | 0          | 0        |
| CST2     | 0.03029587 | 0        |
| CST3     | 0.92240162 | 0.708848 |
| CST4     | 0          | 0        |
| CST5     | 0          | 0        |
| CST6     | 0          | 0        |
| CST7     | 18.0120023 | 12.63749 |
| CST8     | 0          | 0        |
| CST9     | 0          | 0        |
| CST9L    | 0          | 0        |
| CSTA     | 1.21885977 | 1.615418 |
| CSTB     | 29.3012591 | 34.23048 |
| CSTF1    | 5.53427257 | 4.634008 |
| CSTF2    | 4.50319434 | 3.836775 |
| CSTF2T   | 0.03580957 | 0.023246 |
| CSTF3    | 3.2189048  | 2.808246 |
| CSTL1    | 0          | 0        |
| CSTP1    | 0          | 0        |
| CSTP2    | 0          | 0        |
| CSTT     | 0          | 0        |
| CT45A1   | 0.02085846 | 0        |
| CT45A2   | 0          | 0        |
| CT45A3   | 0          | 0        |

|          |            |          |
|----------|------------|----------|
| CT45A4   | 0          | 0        |
| CT45A5   | 0          | 0        |
| CT45A6   | 0          | 0        |
| CT47A1   | 0          | 0        |
| CT47A10  | 0          | 0        |
| CT47A11  | 0          | 0        |
| CT47A2   | 0          | 0        |
| CT47A3   | 0          | 0        |
| CT47A4   | 0          | 0        |
| CT47A5   | 0          | 0        |
| CT47A6   | 0          | 0        |
| CT47A7   | 0          | 0        |
| CT47A8   | 0          | 0        |
| CT47A9   | 0          | 0        |
| CT47B1   | 0          | 0        |
| CTAG1A   | 0.02810873 | 0.031932 |
| CTAG1B   | 0.02810873 | 0.063864 |
| CTAG2    | 0          | 0.024447 |
| CTAGE1   | 0.00487261 | 0.027677 |
| CTAGE3   | 0          | 0        |
| CTAGE4   | 0.0160132  | 0.018191 |
| CTAGE5   | 16.5199029 | 19.30811 |
| CTAGE6   | 0.00789832 | 0.017945 |
| CTAGEP   | 0          | 0        |
| CTBP1    | 41.5087283 | 43.43184 |
| CTBP2    | 12.1800589 | 14.16483 |
| CTBP2P1  | 0          | 0        |
| CTBS     | 14.6248432 | 13.77187 |
| CTCF     | 21.8803352 | 23.45622 |
| CTCFL    | 0          | 0.020734 |
| CTDP1    | 13.0188849 | 13.02535 |
| CTDSP1   | 113.049012 | 149.875  |
| CTDSP2   | 97.4117824 | 91.95291 |
| CTDSPL   | 0.04247542 | 0.042891 |
| CTDSPL2  | 6.41757794 | 6.188081 |
| CTF1     | 0.64440618 | 0.516745 |
| CTF2P    | 0          | 0        |
| CTGF     | 0          | 0        |
| CTGLF10P | 0          | 0        |
| CTGLF11P | 0          | 0        |
| CTGLF12P | 0          | 0        |
| CTGLF8P  | 0          | 0        |
| CTGLF9P  | 0          | 0        |
| CTH      | 0.39604502 | 0.396982 |
| CTHRC1   | 0.01723388 | 0.039156 |
| CTLA4    | 0          | 0.012081 |
| CTNNA1   | 5.03691125 | 4.858311 |

|           |            |          |
|-----------|------------|----------|
| CTNNA2    | 0          | 0        |
| CTNNA3    | 0.00624638 | 0.021288 |
| CTNNAL1   | 0.90292832 | 1.279734 |
| CTNNAP1   | 0          | 0        |
| CTNNB1    | 72.887814  | 81.57535 |
| CTNNBIP1  | 2.49215108 | 2.799223 |
| CTNNBL1   | 22.2057786 | 18.59699 |
| CTNND1    | 6.73803913 | 7.436356 |
| CTNND2    | 0.01160338 | 0.017576 |
| CTNS      | 25.305369  | 23.25443 |
| CTPS      | 0.12487693 | 0.111996 |
| CTPS2     | 0.41141224 | 0.388656 |
| CTR9      | 18.5270786 | 16.79552 |
| CTRB1     | 0          | 0        |
| CTRB2     | 0          | 0        |
| CTRC      | 1.00566099 | 1.248721 |
| CTRL      | 9.15474205 | 10.05259 |
| CTSA      | 103.949898 | 107.6971 |
| CTSB      | 24.4241627 | 31.75103 |
| CTSC      | 11.3414877 | 9.124156 |
| CTSD      | 302.893695 | 399.6813 |
| CTSE      | 0.00943686 | 0        |
| CTSF      | 0.21923136 | 0.320208 |
| CTSG      | 0          | 0.02585  |
| CTSH      | 0.42475416 | 0.466443 |
| CTSK      | 2.61890139 | 2.876879 |
| CTSL1     | 0.07360093 | 0.2369   |
| CTSL2     | 0.02810873 | 0.015966 |
| CTSL3     | 0          | 0        |
| CTSLL1    | 0          | 0        |
| CTSLL2    | 0          | 0        |
| CTSLL3    | 0          | 0        |
| CTSLL5    | 0          | 0        |
| CTSO      | 0.41577538 | 0.317599 |
| CTSS      | 37.5225236 | 27.38632 |
| CTSW      | 1.63854817 | 1.935136 |
| CTSZ      | 77.2330491 | 72.97697 |
| CTTN      | 0.51906486 | 0.924538 |
| CTTNBP2   | 0          | 0.004001 |
| CTTNBP2NL | 0.00712723 | 0.008097 |
| CTXN1     | 0.03329427 | 0.018911 |
| CTXN2     | 0.00780161 | 0        |
| CTXN3     | 0          | 0        |
| CUBN      | 0.01761948 | 0.016013 |
| CUEDC1    | 3.84457716 | 4.607114 |
| CUEDC2    | 5.36181099 | 4.33367  |
| CUGBP1    | 21.5267869 | 17.31365 |

|         |            |          |
|---------|------------|----------|
| CUGBP2  | 58.9945925 | 67.76025 |
| CUL1    | 17.4151853 | 19.08427 |
| CUL2    | 7.69982698 | 6.531408 |
| CUL3    | 13.2214124 | 12.54813 |
| CUL4A   | 11.573676  | 9.464259 |
| CUL4B   | 11.2556492 | 8.83094  |
| CUL5    | 3.57170567 | 3.246011 |
| CUL7    | 2.82848539 | 2.824651 |
| CUL9    | 5.68179063 | 5.990487 |
| CUTA    | 10.8721478 | 7.729293 |
| CUTC    | 21.3327188 | 18.38525 |
| CUX1    | 4.40065067 | 4.669196 |
| CUX2    | 0.01536715 | 0.017457 |
| CUZD1   | 0.16628118 | 0.136426 |
| CWC15   | 13.8700437 | 12.90554 |
| CWC22   | 12.7601124 | 10.99196 |
| CWF19L1 | 13.4871948 | 12.94495 |
| CWF19L2 | 5.7499152  | 5.039176 |
| CX3CL1  | 0.01284774 | 0        |
| CX3CR1  | 0.01352981 | 0.03074  |
| CXADR   | 0          | 0        |
| CXADRP1 | 0          | 0        |
| CXADRP2 | 0          | 0        |
| CXADRP3 | 0          | 0        |
| CXCL1   | 0.01906195 | 0        |
| CXCL10  | 0.0178939  | 0        |
| CXCL11  | 0          | 0        |
| CXCL12  | 0          | 0.004564 |
| CXCL13  | 0.03495483 | 0        |
| CXCL14  | 0.01064574 | 0.012094 |
| CXCL16  | 76.4908204 | 72.4422  |
| CXCL17  | 0.04929738 | 0        |
| CXCL1P  | 0          | 0        |
| CXCL2   | 0.01744841 | 0.019822 |
| CXCL3   | 0          | 0.020608 |
| CXCL5   | 0.05987686 | 0.048586 |
| CXCL6   | 0          | 0        |
| CXCL9   | 0          | 0        |
| CXCR3   | 0.10129977 | 0.076719 |
| CXCR4   | 1170.00461 | 1107.316 |
| CXCR5   | 4.49354039 | 6.050054 |
| CXCR6   | 0          | 0        |
| CXCR7   | 0          | 0        |
| CXorf1  | 0          | 0        |
| CXorf15 | 3.40312203 | 2.849861 |
| CXorf18 | 0          | 0        |
| CXorf19 | 0          | 0        |



|          |            |          |
|----------|------------|----------|
| CXorf21  | 15.0014806 | 9.392872 |
| CXorf22  | 0          | 0        |
| CXorf23  | 3.93676441 | 3.646147 |
| CXorf24  | 0          | 0        |
| CXorf25  | 0          | 0        |
| CXorf26  | 6.12285789 | 5.256723 |
| CXorf27  | 0          | 0        |
| CXorf30  | 0          | 0        |
| CXorf36  | 0.11156558 | 0.105013 |
| CXorf38  | 18.7205408 | 16.11933 |
| CXorf39  | 10.0327471 | 11.5247  |
| CXorf40A | 3.44778487 | 4.091593 |
| CXorf40B | 12.8034851 | 11.12262 |
| CXorf41  | 0          | 0        |
| CXorf42  | 0          | 0        |
| CXorf48  | 0.00972945 | 0        |
| CXorf49  | 0          | 0        |
| CXorf49B | 0          | 0        |
| CXorf50  | 0          | 0        |
| CXorf50B | 0          | 0        |
| CXorf51  | 0          | 0        |
| CXorf52  | 0          | 0        |
| CXorf52B | 0          | 0        |
| CXorf56  | 9.04740458 | 6.156228 |
| CXorf57  | 0.05924146 | 0.042827 |
| CXorf58  | 0          | 0        |
| CXorf59  | 0          | 0        |
| CXorf61  | 0          | 0        |
| CXorf64  | 0          | 0.01945  |
| CXorf65  | 2.71174763 | 1.223795 |
| CXorf66  | 0          | 0        |
| CXorf67  | 0.01092793 | 0        |
| CXXC1    | 20.9473543 | 20.35791 |
| CXXC4    | 0          | 0        |
| CXXC5    | 0.17436349 | 0.363146 |
| CXXC6P1  | 0          | 0        |
| CYB561   | 0.06820367 | 0.126786 |
| CYB561D1 | 9.39759315 | 8.008019 |
| CYB561D2 | 18.580525  | 16.06889 |
| CYB5A    | 0.27797914 | 0.229665 |
| CYB5B    | 6.87272251 | 5.639695 |
| CYB5D1   | 0.03367645 | 0.012752 |
| CYB5D2   | 1.35749134 | 1.171542 |
| CYB5P3   | 0          | 0        |
| CYB5P4   | 0          | 0        |
| CYB5R1   | 6.32167589 | 5.451562 |
| CYB5R2   | 0.49911765 | 0.478411 |

|         |            |          |
|---------|------------|----------|
| CYB5R3  | 57.1261162 | 65.65295 |
| CYB5R4  | 55.347055  | 48.38675 |
| CYB5RL  | 0.17762882 | 0.147979 |
| CYBA    | 499.35161  | 531.0965 |
| CYBASC3 | 6.76448634 | 6.013655 |
| CYBB    | 72.9313124 | 50.07686 |
| CYBRD1  | 0.69971838 | 0.471453 |
| CYC1    | 18.2972508 | 21.06232 |
| CYCS    | 2.97362615 | 2.48478  |
| CYCSL1  | 0          | 0        |
| CYCSP1  | 0          | 0        |
| CYCSP10 | 0          | 0        |
| CYCSP11 | 0          | 0        |
| CYCSP12 | 0          | 0        |
| CYCSP14 | 0          | 0        |
| CYCSP16 | 0          | 0        |
| CYCSP17 | 0          | 0        |
| CYCSP18 | 0          | 0        |
| CYCSP19 | 0          | 0        |
| CYCSP2  | 0          | 0        |
| CYCSP20 | 0          | 0        |
| CYCSP22 | 0          | 0        |
| CYCSP23 | 0          | 0        |
| CYCSP24 | 0          | 0        |
| CYCSP25 | 0          | 0        |
| CYCSP26 | 0          | 0        |
| CYCSP27 | 0          | 0        |
| CYCSP28 | 0          | 0        |
| CYCSP29 | 0          | 0        |
| CYCSP3  | 0          | 0        |
| CYCSP30 | 0          | 0        |
| CYCSP32 | 0          | 0        |
| CYCSP33 | 0          | 0        |
| CYCSP34 | 0          | 0        |
| CYCSP35 | 0          | 0        |
| CYCSP38 | 0          | 0        |
| CYCSP39 | 0          | 0        |
| CYCSP4  | 0          | 0        |
| CYCSP40 | 0          | 0        |
| CYCSP41 | 0          | 0        |
| CYCSP42 | 0          | 0        |
| CYCSP43 | 0          | 0        |
| CYCSP44 | 0          | 0        |
| CYCSP45 | 0          | 0        |
| CYCSP46 | 0          | 0        |
| CYCSP48 | 0          | 0        |
| CYCSP5  | 0          | 0        |

|          |            |          |
|----------|------------|----------|
| CYCSP51  | 0          | 0        |
| CYCSP52  | 0          | 0        |
| CYCSP53  | 0          | 0        |
| CYCSP54  | 0          | 0        |
| CYCSP6   | 0          | 0        |
| CYCSP7   | 0          | 0        |
| CYCSP8   | 0          | 0        |
| CYFIP1   | 0.02467762 | 0.042051 |
| CYFIP2   | 47.3727081 | 35.80586 |
| CYGB     | 0.01077669 | 0.036727 |
| CYHR1    | 10.4307273 | 10.24844 |
| CYLC1    | 0.01045516 | 0        |
| CYLC2    | 0          | 0.011368 |
| CYLD     | 52.593176  | 52.20544 |
| CYMP     | 0          | 0        |
| CYorf15A | 0          | 0        |
| CYorf15B | 0          | 0        |
| CYP11A1  | 0.02597858 | 0.009837 |
| CYP11B1  | 0          | 0.006757 |
| CYP11B2  | 0          | 0        |
| CYP17A1  | 0.10119143 | 0.153273 |
| CYP19A1  | 0          | 0        |
| CYP1A1   | 0.1209279  | 0.119059 |
| CYP1A2   | 0          | 0.007638 |
| CYP1B1   | 0.09792508 | 0.083433 |
| CYP20A1  | 1.58703494 | 1.320524 |
| CYP21A1P | 0          | 0        |
| CYP21A2  | 0.0696203  | 0.067791 |
| CYP24A1  | 0          | 0        |
| CYP26A1  | 0.01696275 | 0.01927  |
| CYP26B1  | 0          | 0.005275 |
| CYP26C1  | 0.01340047 | 0.045669 |
| CYP27A1  | 0.00916935 | 0.020833 |
| CYP27B1  | 0.01690819 | 0.019208 |
| CYP27C1  | 0.0044878  | 0.005098 |
| CYP2A13  | 0          | 0        |
| CYP2A6   | 0.56019873 | 0.528072 |
| CYP2A7   | 0.13766039 | 0.083405 |
| CYP2A7P1 | 0          | 0        |
| CYP2B6   | 0.01377807 | 0.03913  |
| CYP2B7P1 | 0          | 0        |
| CYP2C18  | 0          | 0        |
| CYP2C19  | 0          | 0        |
| CYP2C8   | 0          | 0.012414 |
| CYP2C9   | 0          | 0        |
| CYP2D6   | 1.76161604 | 1.612497 |
| CYP2D7P1 | 0          | 0        |

|          |            |          |
|----------|------------|----------|
| CYP2D7P2 | 0          | 0        |
| CYP2D8P1 | 0          | 0        |
| CYP2E1   | 0.01261268 | 0        |
| CYP2F1   | 0.48360564 | 0.523223 |
| CYP2F1P  | 0          | 0        |
| CYP2G1P  | 0          | 0        |
| CYP2G2P  | 0          | 0        |
| CYP2J2   | 0.0113222  | 0        |
| CYP2R1   | 5.46736525 | 3.850533 |
| CYP2S1   | 0.04813124 | 0.027339 |
| CYP2T2P  | 0          | 0        |
| CYP2T3P  | 0          | 0        |
| CYP2U1   | 0.19910351 | 0.170895 |
| CYP2W1   | 0.01825116 | 0.0311   |
| CYP39A1  | 0          | 0        |
| CYP3A    | 0          | 0        |
| CYP3A4   | 0.01519171 | 0        |
| CYP3A43  | 0          | 0        |
| CYP3A5   | 0.07390275 | 0.097947 |
| CYP3A5P1 | 0          | 0        |
| CYP3A5P2 | 0          | 0        |
| CYP3A7   | 0.030325   | 0.057416 |
| CYP46A1  | 0          | 0.0115   |
| CYP4A11  | 0          | 0        |
| CYP4A22  | 0          | 0.01432  |
| CYP4B1   | 0.00974297 | 0        |
| CYP4F11  | 0.00619303 | 0.014071 |
| CYP4F12  | 3.96129424 | 3.489303 |
| CYP4F2   | 0.04454519 | 0.010121 |
| CYP4F22  | 0.00805877 | 0.009155 |
| CYP4F3   | 0.61921992 | 0.671469 |
| CYP4F3LP | 0          | 0        |
| CYP4F8   | 0          | 0        |
| CYP4V2   | 0.1519688  | 0.177717 |
| CYP4X1   | 0          | 0        |
| CYP4Z1   | 0          | 0        |
| CYP4Z2P  | 0          | 0        |
| CYP51A1  | 2.02519553 | 1.228505 |
| CYP51P1  | 0          | 0        |
| CYP51P2  | 0          | 0        |
| CYP7A1   | 0.05119211 | 0.008308 |
| CYP7B1   | 0.30725953 | 0.289214 |
| CYP8B1   | 0.14371745 | 0.1935   |
| CYR61    | 0          | 0        |
| CYS1     | 0          | 0.017569 |
| CYSLTR1  | 24.1638546 | 18.94717 |
| CYSLTR2  | 52.0104635 | 47.10466 |

|         |            |          |
|---------|------------|----------|
| CYTB    | 0          | 0        |
| CYTH1   | 89.4989473 | 63.38824 |
| CYTH2   | 7.84513651 | 7.367211 |
| CYTH3   | 17.280385  | 17.50363 |
| CYTH4   | 24.3754474 | 22.62159 |
| CYTIP   | 147.320023 | 100.5444 |
| CYTL1   | 0          | 0        |
| CY TSA  | 5.35404562 | 5.250636 |
| CY TSB  | 5.14206464 | 3.477836 |
| CYYR1   | 0          | 0        |
| D2HGDH  | 3.32535204 | 4.784411 |
| D4S234E | 0.03364053 | 0.038216 |
| DAAM1   | 0.45449494 | 0.465805 |
| DAAM2   | 0.006766   | 0.003843 |
| DAB1    | 0.42376636 | 0.37957  |
| DAB2    | 0.01372112 | 0.010392 |
| DAB2IP  | 0.003599   | 0        |
| DACH1   | 18.7753433 | 17.74609 |
| DACH2   | 0.00838331 | 0.009524 |
| DACT1   | 0.00544416 | 0.006185 |
| DACT2   | 0.02143983 | 0.016237 |
| DACT3   | 0.01483792 | 0.025284 |
| DAD1    | 24.3736979 | 23.33681 |
| DAD1L   | 0          | 0        |
| DAG1    | 1.40118106 | 1.65232  |
| DAGLA   | 0.00731062 | 0.008305 |
| DAGLB   | 57.6570932 | 85.87148 |
| DAK     | 1.10059502 | 1.013751 |
| DALRD3  | 12.0763541 | 11.25858 |
| DAND5   | 0          | 0.027581 |
| DAO     | 0          | 0        |
| DAOA    | 0          | 0        |
| DAP     | 14.5525455 | 13.12559 |
| DAP3    | 14.7508224 | 13.82213 |
| DAPK1   | 4.84028754 | 2.847871 |
| DAPK2   | 151.385583 | 127.4145 |
| DAPK3   | 15.192175  | 14.33107 |
| DAPL1   | 0          | 0        |
| DAPP1   | 23.39408   | 11.64176 |
| DARC    | 0          | 0        |
| DARS    | 11.6535749 | 8.558317 |
| DARS2   | 2.05173452 | 1.656294 |
| DAXX    | 21.7650367 | 19.75659 |
| DAZ1    | 0          | 0        |
| DAZ2    | 0          | 0        |
| DAZ3    | 0.00620033 | 0        |
| DAZ4    | 0          | 0        |

|         |            |          |
|---------|------------|----------|
| DAZAP1  | 33.1467949 | 35.0399  |
| DAZAP2  | 294.697235 | 277.1282 |
| DAZL    | 0          | 0        |
| DBC1    | 0.00657864 | 0.007473 |
| DBF4    | 4.97784263 | 5.667135 |
| DBF4B   | 0.52021437 | 0.453078 |
| DBH     | 0          | 0        |
| DBI     | 35.5522667 | 24.24993 |
| DBIL1   | 0          | 0        |
| DBIL2   | 0          | 0        |
| DBN1    | 6.15035315 | 9.198216 |
| DBNDD1  | 0.68740184 | 0.447716 |
| DBNDD2  | 0.18868887 | 0.061244 |
| DBNL    | 144.143906 | 154.5532 |
| DBP     | 11.9139276 | 11.44101 |
| DBR1    | 8.26731882 | 8.508507 |
| DBT     | 1.0653612  | 1.064505 |
| DBX1    | 0.01829881 | 0.020788 |
| DBX2    | 0          | 0        |
| DCAKD   | 1.74488074 | 1.566057 |
| DCBLD1  | 0.76494382 | 0.83278  |
| DCBLD2  | 0.90064195 | 0.991783 |
| DCC     | 0          | 0.008395 |
| DCD     | 0          | 0        |
| DCDC1   | 0          | 0.014001 |
| DCDC2   | 0          | 0        |
| DCDC2B  | 1.58975816 | 1.558109 |
| DCDC5   | 0          | 0        |
| DCHS1   | 0.03518557 | 0.019986 |
| DCHS2   | 0.00519529 | 0        |
| DCI     | 7.13104034 | 7.126072 |
| DCK     | 9.14565605 | 8.502256 |
| DCLK1   | 0.00260214 | 0        |
| DCLK2   | 0.00582258 | 0.006615 |
| DCLK3   | 0          | 0.00447  |
| DCLRE1A | 0.93644603 | 0.769798 |
| DCLRE1B | 0.77167744 | 0.654207 |
| DCLRE1C | 7.33941689 | 7.238793 |
| DCN     | 0          | 0        |
| DCP1A   | 9.09307837 | 7.961703 |
| DCP1B   | 0.44221537 | 0.548033 |
| DCP2    | 13.239825  | 12.62998 |
| DCPS    | 1.05197734 | 0.694428 |
| DCST1   | 0.45205845 | 0.513546 |
| DCST2   | 0.90394147 | 0.908404 |
| DCT     | 0          | 0        |
| DCTD    | 6.37349651 | 6.819304 |

|          |            |          |
|----------|------------|----------|
| DCTN1    | 15.6345514 | 13.01047 |
| DCTN2    | 21.025331  | 19.23503 |
| DCTN3    | 19.6828044 | 18.24988 |
| DCTN4    | 19.362999  | 17.63832 |
| DCTN5    | 11.9014889 | 11.90302 |
| DCTN6    | 10.4616826 | 8.293763 |
| DCTPP1   | 1.93357954 | 1.279559 |
| DCUN1D1  | 9.46540122 | 9.229715 |
| DCUN1D2  | 7.96172156 | 7.648913 |
| DCUN1D3  | 2.00869619 | 2.323551 |
| DCUN1D4  | 4.33816911 | 3.920182 |
| DCUN1D5  | 4.47777265 | 3.767307 |
| DCX      | 0          | 0        |
| DCXR     | 19.8840283 | 25.49858 |
| DDA1     | 9.06388716 | 8.873453 |
| DDAH1    | 0.00938212 | 0.005329 |
| DDAH2    | 82.7428126 | 115.8186 |
| DDB1     | 20.2498462 | 18.17537 |
| DDB2     | 5.05154056 | 3.386309 |
| DDC      | 0          | 0        |
| DDEF1IT1 | 0          | 0        |
| DDHD1    | 7.11708638 | 9.034334 |
| DDHD2    | 1.7341134  | 2.006061 |
| DDI1     | 0          | 0        |
| DDI2     | 1.0518642  | 0.896201 |
| DDIT3    | 38.4502759 | 40.1144  |
| DDIT4    | 112.651131 | 152.3903 |
| DDIT4L   | 0          | 0        |
| DDN      | 0.18531942 | 0.338117 |
| DDO      | 0          | 0.027952 |
| DDOST    | 37.3530927 | 34.69295 |
| DDR1     | 0.14360838 | 0.290029 |
| DDR2     | 0.20042597 | 0.286445 |
| DDRGK1   | 19.29837   | 16.09483 |
| DDT      | 2.93714859 | 3.468792 |
| DDTL     | 1.98036756 | 1.81147  |
| DDX1     | 5.57878331 | 4.651682 |
| DDX10    | 0.26997763 | 0.276777 |
| DDX11    | 4.74368302 | 4.160279 |
| DDX11L16 | 0          | 0        |
| DDX12    | 1.52764279 | 1.508533 |
| DDX17    | 240.917772 | 224.234  |
| DDX18    | 13.7432509 | 12.22486 |
| DDX18P1  | 0          | 0        |
| DDX18P2  | 0          | 0        |
| DDX18P3  | 0          | 0        |
| DDX18P4  | 0          | 0        |

|           |            |          |
|-----------|------------|----------|
| DDX18P5   | 0          | 0        |
| DDX18P6   | 0          | 0        |
| DDX19A    | 4.57009433 | 3.95754  |
| DDX19B    | 13.5071823 | 14.08103 |
| DDX20     | 5.95493994 | 6.307443 |
| DDX21     | 23.966751  | 13.47527 |
| DDX23     | 41.445709  | 38.80691 |
| DDX24     | 50.8730277 | 47.7054  |
| DDX25     | 0.0230794  | 0        |
| DDX26B    | 11.4579311 | 13.66814 |
| DDX27     | 18.8642858 | 16.02385 |
| DDX28     | 8.01468108 | 7.741656 |
| DDX31     | 0.31654619 | 0.271278 |
| DDX39     | 14.2325317 | 16.3601  |
| DDX3X     | 106.85183  | 102.3445 |
| DDX3Y     | 0.00438484 | 0.004981 |
| DDX4      | 0          | 0        |
| DDX41     | 28.5001159 | 28.70981 |
| DDX42     | 34.2734483 | 33.77293 |
| DDX43     | 0.66289063 | 0.567006 |
| DDX46     | 14.8795219 | 13.55971 |
| DDX47     | 2.39529087 | 2.195274 |
| DDX49     | 10.3278274 | 11.44385 |
| DDX5      | 273.698462 | 240.7001 |
| DDX50     | 8.33391763 | 7.698195 |
| DDX50P1   | 0          | 0        |
| DDX50P2   | 0          | 0        |
| DDX51     | 2.3529832  | 2.207272 |
| DDX52     | 5.35249343 | 5.065046 |
| DDX53     | 0          | 0.022533 |
| DDX54     | 4.4104723  | 3.941779 |
| DDX55     | 3.23158214 | 3.115449 |
| DDX56     | 11.9637094 | 12.32222 |
| DDX58     | 7.53746621 | 6.162117 |
| DDX59     | 13.3764606 | 12.4985  |
| DDX6      | 78.6212994 | 89.75615 |
| DDX60     | 1.52678593 | 1.345086 |
| DDX60L    | 7.44634167 | 6.888983 |
| DEAF1     | 3.08103156 | 3.412158 |
| DEC1      | 0          | 0        |
| DECR1     | 3.19329567 | 2.692087 |
| DECR2     | 1.38132307 | 1.735179 |
| DEDD      | 21.9480998 | 22.29799 |
| DEDD2     | 32.4460857 | 28.51783 |
| DEF109P1B | 0          | 0        |
| DEF6      | 111.463558 | 126.8948 |
| DEF8      | 45.3578983 | 34.32544 |



|           |            |          |
|-----------|------------|----------|
| DEFA1     | 0.51914397 | 0.098293 |
| DEFA10P   | 0          | 0        |
| DEFA11P   | 0          | 0        |
| DEFA3     | 1.38154125 | 0.686636 |
| DEFA4     | 0          | 0        |
| DEFA5     | 0.09365404 | 0.053196 |
| DEFA6     | 0          | 0        |
| DEFA7P    | 0          | 0        |
| DEFA8P    | 0          | 0        |
| DEFA9P    | 0          | 0        |
| DEFB1     | 0          | 0        |
| DEFB103A  | 0          | 0        |
| DEFB103B  | 0          | 0        |
| DEFB104A  | 0          | 0        |
| DEFB104B  | 0          | 0        |
| DEFB105A  | 0          | 0        |
| DEFB105B  | 0          | 0        |
| DEFB106A  | 0          | 0        |
| DEFB106B  | 0          | 0        |
| DEFB107A  | 0          | 0        |
| DEFB107B  | 0          | 0        |
| DEFB108B  | 0          | 0        |
| DEFB108P1 | 0          | 0        |
| DEFB108P2 | 0          | 0        |
| DEFB108P3 | 0          | 0        |
| DEFB108P4 | 0          | 0        |
| DEFB109P1 | 0          | 0        |
| DEFB110   | 0          | 0        |
| DEFB111   | 0          | 0        |
| DEFB112   | 0          | 0        |
| DEFB113   | 0          | 0        |
| DEFB114   | 0          | 0        |
| DEFB115   | 0          | 0        |
| DEFB116   | 0          | 0        |
| DEFB117   | 0          | 0        |
| DEFB118   | 0          | 0.040552 |
| DEFB119   | 0          | 0        |
| DEFB121   | 0          | 0        |
| DEFB122   | 0          | 0        |
| DEFB123   | 0          | 0        |
| DEFB124   | 0          | 0        |
| DEFB125   | 0          | 0        |
| DEFB126   | 0          | 0        |
| DEFB127   | 0          | 0        |
| DEFB128   | 0          | 0        |
| DEFB129   | 0          | 0        |
| DEFB130   | 0          | 0        |

|          |            |          |
|----------|------------|----------|
| DEFB131  | 0          | 0        |
| DEFB132  | 0          | 0        |
| DEFB133  | 0          | 0        |
| DEFB134  | 0          | 0        |
| DEFB136  | 0          | 0        |
| DEFB137  | 0          | 0        |
| DEFB4    | 0          | 0        |
| DEFT1P   | 0          | 0        |
| DEGS1    | 39.4199265 | 39.13142 |
| DEGS2    | 0.31425762 | 0.595003 |
| DEK      | 23.7422929 | 22.2545  |
| DEM1     | 0.7871459  | 0.646417 |
| DENND1A  | 3.97532829 | 4.369064 |
| DENND1B  | 5.40583026 | 5.638408 |
| DENND1C  | 38.5602313 | 38.90837 |
| DENND2A  | 0.01214635 | 0        |
| DENND2C  | 0.85180631 | 0.643107 |
| DENND2D  | 4.84962335 | 4.538405 |
| DENND3   | 216.459722 | 241.0711 |
| DENND4A  | 6.46712945 | 5.388059 |
| DENND4B  | 43.8840944 | 49.65986 |
| DENND4C  | 5.53250913 | 5.053862 |
| DENND5A  | 63.0971664 | 75.05168 |
| DENND5B  | 0.75674176 | 0.913082 |
| DENR     | 8.34556587 | 7.545541 |
| DEPDC1   | 0.0039425  | 0.013436 |
| DEPDC1B  | 0.30228112 | 0.352935 |
| DEPDC1P1 | 0          | 0        |
| DEPDC1P2 | 0          | 0        |
| DEPDC4   | 0.01820375 | 0        |
| DEPDC5   | 16.5428618 | 16.11392 |
| DEPDC6   | 0.02397415 | 0.05447  |
| DEPDC7   | 0.55509211 | 0.099567 |
| DERA     | 2.45132919 | 2.175152 |
| DERL1    | 18.8769026 | 17.58325 |
| DERL2    | 20.0365621 | 18.43837 |
| DERL3    | 0.13797873 | 0.179138 |
| DES      | 0.00935291 | 0        |
| DET1     | 0.26921038 | 0.224273 |
| DEXI     | 6.27538193 | 6.158253 |
| DFFA     | 2.28884912 | 2.039486 |
| DFFB     | 3.99259092 | 4.937939 |
| DFNA5    | 0.00820021 | 0.009316 |
| DFNB31   | 0.2478925  | 0.298851 |
| DFNB59   | 0.02753809 | 0.031284 |
| DGAT1    | 21.4225707 | 21.66744 |
| DGAT2    | 42.3936526 | 35.7887  |

|                |            |          |
|----------------|------------|----------|
| DGAT2L6        | 0          | 0        |
| DGCR10         | 0          | 0        |
| DGCR11         | 0          | 0        |
| DGCR14         | 3.92004314 | 3.357665 |
| DGCR2          | 26.5723797 | 21.97281 |
| DGCR5          | 0          | 0        |
| DGCR6          | 2.33807222 | 2.79381  |
| DGCR6L         | 9.12488479 | 9.562287 |
| DGCR8          | 3.22883939 | 3.382962 |
| DGCR9          | 0          | 0        |
| DGKA           | 41.2041429 | 39.60003 |
| DGKB           | 0          | 0.003164 |
| DGKD           | 66.1063751 | 51.69444 |
| DGKE           | 0.12991966 | 0.190638 |
| DGKG           | 0.64141392 | 0.444604 |
| DGKH           | 0.03464626 | 0.022491 |
| DGKI           | 0.01319581 | 0        |
| DGKK           | 0.00536771 | 0.006098 |
| DGKQ           | 7.40149701 | 6.79046  |
| DGKZ           | 50.6611973 | 72.44153 |
| DGUOK          | 31.4828601 | 29.18827 |
| DHCR24         | 0.45621927 | 0.323224 |
| DHCR7          | 25.0489403 | 33.20613 |
| DHDDS          | 3.42035829 | 3.118595 |
| DHDH           | 0          | 0.066286 |
| DHFR           | 0.7997892  | 0.853693 |
| DHFRL1         | 0.8461687  | 0.795746 |
| DHFRP1         | 0          | 0        |
| DHFRP2         | 0          | 0        |
| DHH            | 0          | 0.037012 |
| DHODH          | 0.2035366  | 0.254343 |
| DHPS           | 15.9792515 | 13.64606 |
| DHRS1          | 9.17801404 | 6.507827 |
| DHRS11         | 1.01311044 | 1.061228 |
| DHRS12         | 0.29005863 | 0.382945 |
| DHRS13         | 2.88947807 | 3.655503 |
| DHRS2          | 0          | 0.014158 |
| DHRS3          | 0.51224505 | 0.886103 |
| DHRS4          | 0.65806983 | 0.897093 |
| DHRS4L1        | 0.08416866 | 0.076494 |
| DHRS4L2        | 0.55088203 | 0.712729 |
| DHRS7          | 180.240858 | 231.3012 |
| DHRS7B         | 3.3487618  | 3.752134 |
| DHRS7C         | 0          | 0        |
| DHRS9          | 0.9467207  | 0.41568  |
| DHRSX (NC_000C | 2.66794072 | 2.456172 |
| DHRSX (NC_000C | 2.51292275 | 3.234732 |

|         |            |          |
|---------|------------|----------|
| DHTKD1  | 4.00193463 | 3.033905 |
| DHX15   | 28.380014  | 24.8988  |
| DHX16   | 20.7513853 | 20.27087 |
| DHX29   | 5.21285313 | 4.976732 |
| DHX30   | 5.90299372 | 5.69135  |
| DHX32   | 0.95196124 | 0.95696  |
| DHX33   | 2.07415535 | 1.770136 |
| DHX34   | 9.35636864 | 8.992492 |
| DHX35   | 2.75794253 | 2.792988 |
| DHX36   | 12.0003343 | 10.89415 |
| DHX37   | 0.53152628 | 0.493559 |
| DHX38   | 28.8992088 | 26.14277 |
| DHX40   | 10.092849  | 7.924682 |
| DHX40P  | 0          | 0        |
| DHX57   | 0.50495619 | 0.509351 |
| DHX58   | 5.4150069  | 4.371787 |
| DHX8    | 21.8763563 | 20.18292 |
| DHX9    | 40.6101009 | 38.7305  |
| DHX9P   | 0          | 0        |
| DIABLO  | 14.6633881 | 13.23048 |
| DIAPH1  | 96.5603757 | 92.39701 |
| DIAPH2  | 1.99265032 | 2.1845   |
| DIAPH3  | 0.01264301 | 0.014363 |
| DICER1  | 10.8558867 | 9.259092 |
| DIDO1   | 8.33990495 | 8.194544 |
| DIMT1L  | 2.67374151 | 2.055623 |
| DIO1    | 0.22607883 | 0.231146 |
| DIO2    | 0.00927179 | 0        |
| DIO3    | 0          | 0        |
| DIO3OS  | 0          | 0        |
| DIP2A   | 16.2063037 | 14.57955 |
| DIP2B   | 10.2822674 | 9.808928 |
| DIP2C   | 0.00266278 | 0.015125 |
| DIRAS1  | 0.14231389 | 0.063263 |
| DIRAS2  | 0.06143267 | 0.023263 |
| DIRAS3  | 0.01289107 | 0        |
| DIRC1   | 0.01446034 | 0        |
| DIRC2   | 8.30428115 | 7.73743  |
| DIRC3   | 0          | 0        |
| DIS3    | 6.67128953 | 5.701827 |
| DIS3L   | 2.29476782 | 1.878954 |
| DIS3L2  | 1.04466236 | 0.988961 |
| DIS3L2P | 0          | 0        |
| DISC1   | 0.3208512  | 0.375372 |
| DISC2   | 0          | 0        |
| DISP1   | 0.23494466 | 0.135968 |
| DISP2   | 0.05849655 | 0.09968  |

|                |            |          |
|----------------|------------|----------|
| DIXDC1         | 2.3028371  | 2.230574 |
| dJ341D10.1     | 0          | 0        |
| DKC1           | 14.645118  | 13.71749 |
| DKFZp434E1119  | 0          | 0        |
| DKFZP434H168   | 0          | 0        |
| DKFZP434I0714  | 0.34159192 | 0.213826 |
| DKFZp434J0226  | 0          | 0        |
| DKFZP434K028   | 0          | 0        |
| DKFZP434L187   | 0          | 0        |
| DKFZp434L192   | 0          | 0        |
| DKFZp451A211   | 0          | 0        |
| DKFZp564N2472  | 0          | 0        |
| DKFZP564O0823  | 0          | 0.00474  |
| DKFZp566F0947  | 0          | 0        |
| DKFZP586I1420  | 0          | 0        |
| DKFZp667F0711  | 0.14030249 | 0.182155 |
| DKFZp686A1627  | 0          | 0        |
| DKFZp686E2433  | 0.90431531 | 0.770487 |
| DKFZP686I15217 | 0          | 0        |
| DKFZp686L1318  | 0.00568099 | 0.006454 |
| DKFZp686O2416  | 0          | 0        |
| DKFZp761E198   | 17.4297631 | 28.96271 |
| DKFZP779L1853  | 0          | 0        |
| DKFZp779M0652  | 0          | 0        |
| DKFZP781G0119  | 0          | 0        |
| DKK1           | 0          | 0        |
| DKK2           | 0          | 0        |
| DKK3           | 0.01406377 | 0.007988 |
| DKK4           | 0          | 0.029199 |
| DKKL1          | 0          | 0        |
| DKKL2          | 0          | 0        |
| DLAT           | 2.25723127 | 2.260298 |
| DLC1           | 0.00524388 | 0.011914 |
| DLD            | 22.7407254 | 17.96555 |
| DLEC1          | 0.19100318 | 0.14891  |
| DLEU1          | 0          | 0        |
| DLEU2          | 0          | 0        |
| DLEU2L         | 0          | 0        |
| DLEU7          | 0.01781808 | 0        |
| DLG1           | 5.92841317 | 5.080534 |
| DLG2           | 0.01665844 | 0.024331 |
| DLG3           | 0.1181019  | 0.126913 |
| DLG4           | 0.11789905 | 0.143856 |
| DLG5           | 0.45823358 | 0.443914 |
| DLGAP1         | 0.15414466 | 0.154097 |
| DLGAP2         | 0          | 0        |
| DLGAP3         | 0.01172307 | 0.006659 |

|          |            |          |
|----------|------------|----------|
| DLGAP4   | 6.50647789 | 6.846956 |
| DLGAP5   | 0.0141157  | 0        |
| DLGAP5P1 | 0          | 0        |
| DLK1     | 0.01372411 | 0.046772 |
| DLK2     | 0.10447369 | 0.16319  |
| DLL1     | 0.06352064 | 0.064944 |
| DLL3     | 0          | 0        |
| DLL4     | 0.11186993 | 0.148267 |
| DLST     | 44.5097212 | 46.98905 |
| DLSTP    | 0          | 0        |
| DLX1     | 0          | 0        |
| DLX2     | 0          | 0        |
| DLX3     | 0.00808045 | 0        |
| DLX4     | 0.00907438 | 0.020617 |
| DLX5     | 0          | 0        |
| DLX6     | 0          | 0        |
| DMAP1    | 9.42925375 | 8.466636 |
| DMBT1    | 0          | 0.003108 |
| DMBX1    | 0          | 0        |
| DMC1     | 0.00926634 | 0        |
| DMD      | 0.00936958 | 0.012165 |
| DMGDH    | 0          | 0.007747 |
| DMKN     | 0.00850195 | 0.009658 |
| DMP1     | 0          | 0        |
| DMPK     | 0.02336148 | 0.01327  |
| DMRT1    | 0.01892469 | 0        |
| DMRT2    | 0          | 0        |
| DMRT3    | 0          | 0.010936 |
| DMRTA1   | 0.01826701 | 0        |
| DMRTA2   | 0          | 0        |
| DMRTB1   | 0          | 0        |
| DMRTC1   | 0          | 0        |
| DMRTC1B  | 0          | 0        |
| DMRTC2   | 0          | 0.026233 |
| DMTF1    | 29.8210851 | 29.88602 |
| DMWD     | 0.04449133 | 0.072204 |
| DMXL1    | 2.35977491 | 1.977421 |
| DMXL2    | 4.78336216 | 3.402161 |
| DNA2     | 0.51420646 | 0.465154 |
| DNAH1    | 1.86998748 | 1.907529 |
| DNAH10   | 0.12141821 | 0.148409 |
| DNAH11   | 0.01185528 | 0.013468 |
| DNAH12   | 0.0062594  | 0.00237  |
| DNAH14   | 0.00581734 | 0.003304 |
| DNAH17   | 2.81481982 | 2.438649 |
| DNAH2    | 0.00311371 | 0.008843 |
| DNAH3    | 0.00510695 | 0.009669 |

|               |            |          |
|---------------|------------|----------|
| DNAH5         | 0.00405034 | 0.001534 |
| DNAH6         | 0.00164325 | 0.007467 |
| DNAH7         | 0.01866053 | 0.015417 |
| DNAH8         | 0.00145283 | 0.006602 |
| DNAH9         | 0.00299912 | 0.003407 |
| DNAI1         | 0.00834008 | 0.009474 |
| DNAI2         | 0          | 0.010531 |
| DNAJA1        | 34.6548856 | 31.32397 |
| DNAJA2        | 29.1512627 | 43.85206 |
| DNAJA3        | 0.77555629 | 0.5903   |
| DNAJA4        | 5.71774273 | 7.99712  |
| DNAJB1        | 15.4135543 | 14.80385 |
| DNAJB11       | 18.9464498 | 16.54564 |
| DNAJB12       | 17.4857454 | 16.74697 |
| DNAJB13       | 0.10092159 | 0.076432 |
| DNAJB14       | 13.5912118 | 12.40022 |
| DNAJB1P       | 0          | 0        |
| DNAJB2        | 23.2052373 | 24.05326 |
| DNAJB3        | 0          | 0        |
| DNAJB4        | 1.7740123  | 1.578123 |
| DNAJB5        | 0.03625057 | 0.115307 |
| DNAJB6        | 34.3128128 | 35.35595 |
| DNAJB7        | 0          | 0        |
| DNAJB8        | 0.00851918 | 0        |
| DNAJB9        | 5.37382985 | 5.308921 |
| DNAJC1        | 4.15277938 | 4.843274 |
| DNAJC10       | 0.73711511 | 0.734839 |
| DNAJC11       | 1.94099624 | 1.27658  |
| DNAJC12       | 0.01376003 | 0        |
| DNAJC13       | 5.15673613 | 4.06683  |
| DNAJC14       | 15.5132847 | 13.6138  |
| DNAJC15       | 1.30272224 | 1.51433  |
| DNAJC16       | 2.02401526 | 1.760164 |
| DNAJC17       | 9.86687233 | 7.985757 |
| DNAJC18       | 0.79015796 | 0.647915 |
| DNAJC19       | 3.83088657 | 3.829039 |
| DNAJC2        | 7.92727216 | 7.213044 |
| DNAJC21       | 5.107313   | 5.532665 |
| DNAJC22       | 0          | 0.012988 |
| DNAJC24       | 2.41791306 | 1.82323  |
| DNAJC25       | 1.04755838 | 0.874102 |
| DNAJC25-GNG1C | 0.9292964  | 0.3464   |
| DNAJC27       | 1.09177486 | 1.195978 |
| DNAJC28       | 0.82981079 | 0.789493 |
| DNAJC3        | 33.8530056 | 28.28894 |
| DNAJC30       | 0.26551326 | 0.207369 |
| DNAJC4        | 28.5028222 | 28.60637 |

|          |            |          |
|----------|------------|----------|
| DNAJC5   | 37.0684175 | 43.90851 |
| DNAJC5B  | 0          | 0        |
| DNAJC5G  | 0          | 0        |
| DNAJC6   | 0.03290921 | 0.074771 |
| DNAJC7   | 23.3789863 | 22.52025 |
| DNAJC8   | 29.1733912 | 28.78393 |
| DNAJC8P1 | 0          | 0        |
| DNAJC9   | 10.9735548 | 8.410484 |
| DNAL1    | 0.39224041 | 0.399618 |
| DNAL4    | 1.96538063 | 1.702637 |
| DNALI1   | 0.00793708 | 0        |
| DNASE1   | 4.22814112 | 5.258116 |
| DNASE1L1 | 10.6905497 | 13.23122 |
| DNASE1L2 | 0          | 0.090065 |
| DNASE1L3 | 0.07185691 | 0.016326 |
| DNASE2   | 0.84813337 | 1.153813 |
| DNASE2B  | 0          | 0.017758 |
| DND1     | 8.99773989 | 11.23479 |
| DNER     | 0.00642583 | 0.0073   |
| DNHD1    | 1.00695259 | 1.029675 |
| DNLZ     | 7.14396604 | 7.389868 |
| DNM1     | 0.0581703  | 0.051397 |
| DNM1L    | 6.87471793 | 6.085213 |
| DNM1P17  | 0          | 0        |
| DNM1P18  | 0          | 0        |
| DNM1P19  | 0          | 0        |
| DNM1P24  | 0          | 0        |
| DNM1P25  | 0          | 0        |
| DNM1P26  | 0          | 0        |
| DNM1P27  | 0          | 0        |
| DNM1P28  | 0          | 0        |
| DNM1P29  | 0          | 0        |
| DNM1P30  | 0          | 0        |
| DNM1P31  | 0          | 0        |
| DNM1P32  | 0          | 0        |
| DNM1P33  | 0          | 0        |
| DNM1P34  | 0          | 0        |
| DNM1P35  | 0          | 0        |
| DNM1P36  | 0          | 0        |
| DNM1P37  | 0          | 0        |
| DNM1P38  | 0          | 0        |
| DNM1P39  | 0          | 0        |
| DNM1P40  | 0          | 0        |
| DNM1P42  | 0          | 0        |
| DNM1P43  | 0          | 0        |
| DNM1P44  | 0          | 0        |
| DNM1P45  | 0          | 0        |



|          |            |          |
|----------|------------|----------|
| DNM1P46  | 0          | 0        |
| DNM1P47  | 0          | 0        |
| DNM1P5   | 0          | 0        |
| DNM1P9   | 0          | 0        |
| DNM2     | 155.599712 | 190.321  |
| DNM3     | 0.08526756 | 0.034372 |
| DNMBP    | 1.04141092 | 1.160667 |
| DNMT1    | 8.11032674 | 13.43316 |
| DNMT3A   | 4.76101549 | 6.069827 |
| DNMT3AP1 | 0          | 0        |
| DNMT3B   | 0.14077435 | 0.201192 |
| DNMT3L   | 0.01233157 | 0.070044 |
| DNPEP    | 2.69931443 | 2.243515 |
| DNTT     | 0          | 0        |
| DNTTIP1  | 29.9244245 | 26.03292 |
| DNTTIP2  | 16.1488676 | 17.62279 |
| DOC2A    | 0.05088415 | 0.034683 |
| DOC2B    | 0.07823379 | 0        |
| DOCK1    | 0.00316551 | 0.007192 |
| DOCK10   | 2.24372056 | 1.626412 |
| DOCK11   | 28.5131108 | 27.20988 |
| DOCK2    | 50.278715  | 48.303   |
| DOCK3    | 0.03362132 | 0.010913 |
| DOCK4    | 0.09836707 | 0.094555 |
| DOCK5    | 14.7135572 | 14.19196 |
| DOCK6    | 0.08888115 | 0.089751 |
| DOCK7    | 0.02981471 | 0.03387  |
| DOCK8    | 61.2156014 | 64.81308 |
| DOCK9    | 0.04178429 | 0.038567 |
| DOHH     | 0.64300769 | 0.452194 |
| DOK1     | 19.401152  | 20.71307 |
| DOK2     | 144.065093 | 113.1372 |
| DOK3     | 178.004117 | 229.6569 |
| DOK4     | 0.07645575 | 0.052113 |
| DOK5     | 0          | 0        |
| DOK6     | 0          | 0.002846 |
| DOK7     | 0.27858973 | 0.642273 |
| DOLK     | 1.50726057 | 1.094554 |
| DOLPP1   | 0.88893863 | 0.625667 |
| DOM3Z    | 6.50595147 | 6.399407 |
| DONSON   | 3.02299689 | 3.103964 |
| DOPEY1   | 6.67039871 | 5.796652 |
| DOPEY2   | 14.6977441 | 16.73109 |
| DOT1L    | 11.5588425 | 10.49711 |
| DPAGT1   | 2.42448961 | 1.917945 |
| DPCR1    | 0          | 0        |
| DPEP1    | 0          | 0        |

|                |            |          |
|----------------|------------|----------|
| DPEP2          | 248.539342 | 216.0841 |
| DPEP3          | 15.5451958 | 18.31925 |
| DPF1           | 0.00849508 | 0        |
| DPF2           | 27.5101051 | 25.4021  |
| DPF3           | 0.04629091 | 0.031552 |
| DPH1           | 3.02688136 | 3.112137 |
| DPH2           | 0.72414035 | 0.506973 |
| DPH3           | 3.66714875 | 3.137675 |
| DPH3B          | 0          | 0        |
| DPH5           | 0.77914667 | 0.620907 |
| DPM1           | 23.716252  | 22.01445 |
| DPM2           | 8.10977051 | 7.008049 |
| DPM3           | 10.800947  | 9.999433 |
| DPP10          | 0.01688443 | 0.043157 |
| DPP3           | 5.46173465 | 5.102364 |
| DPP4           | 0          | 0.012249 |
| DPP6 (NC_0000C | 0.01419671 | 0        |
| DPP6 (NC_0000C | 0.00538283 | 0        |
| DPP7           | 22.6636684 | 24.59413 |
| DPP8           | 11.8041237 | 10.64771 |
| DPP9           | 16.9138201 | 16.82026 |
| DPPA2          | 0          | 0        |
| DPPA2P1        | 0          | 0        |
| DPPA3          | 0          | 0        |
| DPPA4          | 0.48514253 | 0.517214 |
| DPPA5          | 0.06871023 | 0.078056 |
| DPRX           | 0          | 0        |
| DPRXP1         | 0          | 0        |
| DPRXP2         | 0          | 0        |
| DPRXP3         | 0          | 0        |
| DPRXP4         | 0          | 0        |
| DPRXP5         | 0          | 0        |
| DPRXP6         | 0          | 0        |
| DPRXP7         | 0          | 0        |
| DPT            | 0          | 0.014025 |
| DPY19L1        | 8.42309765 | 10.48195 |
| DPY19L1P1      | 0          | 0        |
| DPY19L2        | 0.06737227 | 0.129522 |
| DPY19L2P1      | 0          | 0        |
| DPY19L2P2      | 0          | 0        |
| DPY19L2P3      | 0          | 0        |
| DPY19L2P4      | 0          | 0        |
| DPY19L3        | 8.72437993 | 8.0564   |
| DPY19L4        | 0.21922466 | 0.176246 |
| DPY30          | 9.85562389 | 8.389645 |
| DPYD           | 1.21954483 | 1.208217 |
| DPYS           | 0.01980719 | 0.011251 |

|         |            |          |
|---------|------------|----------|
| DPYSL2  | 0.09725373 | 0.047349 |
| DPYSL3  | 0          | 0.00473  |
| DPYSL4  | 0.01546549 | 0.026354 |
| DPYSL5  | 0          | 0.004585 |
| DQX1    | 0.01596456 | 0.018136 |
| DR1     | 28.7370214 | 31.86418 |
| DRAM    | 4.3023892  | 4.19995  |
| DRAP1   | 68.2046414 | 81.03531 |
| DRD1    | 0          | 0        |
| DRD2    | 0.00779004 | 0        |
| DRD3    | 0          | 0        |
| DRD4    | 0.89666853 | 1.229381 |
| DRD5    | 0.00884905 | 0        |
| DRD5P1  | 0          | 0        |
| DRD5P2  | 0          | 0        |
| DRG1    | 10.4256641 | 10.04822 |
| DRG2    | 9.20971859 | 8.7545   |
| DRGX    | 0          | 0        |
| DRP2    | 0.00590765 | 0.003356 |
| DSC1    | 0.00984562 | 0.011185 |
| DSC2    | 39.8739689 | 39.86923 |
| DSC3    | 0.03314397 | 0.020537 |
| DSCAM   | 0.0088727  | 0.00336  |
| DSCAML1 | 0.00609518 | 0.006924 |
| DSCC1   | 0.37992004 | 0.505282 |
| DSCR10  | 0          | 0        |
| DSCR3   | 19.5637115 | 17.71363 |
| DSCR4   | 0          | 0        |
| DSCR6   | 0.00940731 | 0        |
| DSCR8   | 0          | 0        |
| DSCR9   | 0          | 0        |
| DSE     | 26.794722  | 33.07916 |
| DSEL    | 0.01132708 | 0.002574 |
| DSG1    | 0.00385998 | 0        |
| DSG2    | 0.08554442 | 0.046477 |
| DSG3    | 0          | 0        |
| DSG4    | 0          | 0        |
| DSN1    | 4.13489822 | 3.454183 |
| DSP     | 0.01512614 | 0.007364 |
| DSPP    | 0          | 0        |
| DST     | 0.40950762 | 0.313561 |
| DSTN    | 16.0158592 | 17.04516 |
| DSTYK   | 7.03679998 | 7.060739 |
| DTD1    | 2.5513194  | 2.095185 |
| DTL     | 0.04288939 | 0.070378 |
| DTNA    | 0.02822733 | 0.016033 |
| DTNB    | 2.74502098 | 2.413613 |

|         |            |          |
|---------|------------|----------|
| DTNBP1  | 4.37627371 | 4.028814 |
| DTWD1   | 0.64222829 | 0.79038  |
| DTWD2   | 0.36775307 | 0.326535 |
| DTX1    | 0.04476196 | 0.029057 |
| DTX2    | 11.1503618 | 11.66719 |
| DTX3    | 0.02072482 | 0.047087 |
| DTX3L   | 4.85900939 | 4.61718  |
| DTX4    | 1.49481214 | 0.993324 |
| DTYMK   | 1.17805748 | 0.816585 |
| DUB3    | 0          | 0        |
| DUB4    | 0          | 0        |
| DULLARD | 57.3407813 | 50.8991  |
| DUOX1   | 0.15925475 | 0.180916 |
| DUOX2   | 0.34456893 | 0.146788 |
| DUOXA1  | 0.02236737 | 0        |
| DUOXA2  | 0.11680739 | 0.033174 |
| DUPD1   | 0          | 0        |
| DUS1L   | 18.2505287 | 18.13167 |
| DUS2L   | 19.8681736 | 17.05193 |
| DUS3L   | 2.80201395 | 2.230516 |
| DUS4L   | 0.31771611 | 0.286621 |
| DUSP1   | 58.672673  | 62.21982 |
| DUSP10  | 1.29906277 | 1.394589 |
| DUSP11  | 12.3663325 | 11.64381 |
| DUSP12  | 5.23529058 | 4.245392 |
| DUSP13  | 0.01147045 | 0.013031 |
| DUSP14  | 0.19519538 | 0.221745 |
| DUSP15  | 0.01213233 | 0.013783 |
| DUSP16  | 3.34895905 | 2.384492 |
| DUSP18  | 3.58279182 | 3.213243 |
| DUSP19  | 0.13289854 | 0.075487 |
| DUSP2   | 0.51159559 | 0.609531 |
| DUSP21  | 0          | 0        |
| DUSP22  | 5.69288164 | 5.370521 |
| DUSP23  | 6.53780364 | 6.136904 |
| DUSP26  | 0          | 0.014485 |
| DUSP27  | 0.00521203 | 0.011842 |
| DUSP28  | 5.05689632 | 6.343762 |
| DUSP3   | 3.45321423 | 3.169615 |
| DUSP4   | 0.16911787 | 0.113012 |
| DUSP5   | 1.53032472 | 1.766818 |
| DUSP5P  | 0          | 0        |
| DUSP6   | 3.41475233 | 1.041797 |
| DUSP7   | 1.05211503 | 1.214497 |
| DUSP8   | 0.018802   | 0.032039 |
| DUSP9   | 0.00883417 | 0        |
| DUT     | 3.41685031 | 3.37114  |

|          |            |          |
|----------|------------|----------|
| DUX4     | 0          | 0        |
| DUX4C    | 0          | 0        |
| DUX4L16  | 0          | 0        |
| DUX4L17  | 0          | 0        |
| DUX4L18  | 0          | 0        |
| DUX4L19  | 0          | 0        |
| DUXA     | 0          | 0        |
| DUXAP1   | 0          | 0        |
| DUXAP10  | 0          | 0        |
| DUXAP2   | 0          | 0        |
| DUXAP3   | 0          | 0        |
| DUXAP4   | 0          | 0        |
| DUXAP5   | 0          | 0        |
| DUXAP6   | 0          | 0        |
| DUXAP7   | 0          | 0        |
| DUXAP8   | 0          | 0        |
| DUXAP9   | 0          | 0        |
| DVL1     | 4.7026561  | 4.770487 |
| DVL1L1   | 0          | 0        |
| DVL2     | 8.17032092 | 6.897855 |
| DVL3     | 48.1688588 | 70.95227 |
| DYDC1    | 0          | 0        |
| DYDC2    | 0          | 0        |
| DYM      | 9.16057989 | 8.861485 |
| DYNC1H1  | 31.0878726 | 37.963   |
| DYNC1I1  | 0          | 0        |
| DYNC1I2  | 3.77357016 | 3.460679 |
| DYNC1LI1 | 14.0873948 | 14.76359 |
| DYNC1LI2 | 21.8933047 | 19.02656 |
| DYNC2H1  | 0.02609173 | 0.026153 |
| DYNC2LI1 | 0.56469107 | 0.577348 |
| DYNLL1   | 18.2903286 | 14.78255 |
| DYNLL2   | 47.5073017 | 47.64467 |
| DYNLRB1  | 44.4754811 | 38.94842 |
| DYNLRB2  | 0          | 0        |
| DYNLT1   | 4.74960714 | 3.471073 |
| DYNLT3   | 1.19548362 | 0.679044 |
| DYRK1A   | 17.6027442 | 16.61693 |
| DYRK1B   | 3.94795169 | 2.807796 |
| DYRK2    | 10.4938898 | 8.706295 |
| DYRK3    | 0          | 0.010564 |
| DYRK4    | 0.20512518 | 0.168296 |
| DYSF     | 0.00866667 | 0.006564 |
| DYSFIP1  | 0.15788734 | 0.179363 |
| DYTN     | 0          | 0        |
| DYX1C1   | 2.69464613 | 3.020882 |
| DZIP1    | 0.00280787 | 0.009569 |

|                 |            |          |
|-----------------|------------|----------|
| DZIP1L          | 0.95706488 | 0.861587 |
| DZIP3           | 0.15934029 | 0.103436 |
| E2F1            | 2.76444166 | 1.610033 |
| E2F2            | 0.44950149 | 0.202416 |
| E2F3            | 8.81896992 | 12.62683 |
| E2F3P1          | 0          | 0        |
| E2F4            | 41.5500588 | 50.1701  |
| E2F5            | 0.0113283  | 0.051477 |
| E2F6            | 2.68657007 | 2.889803 |
| E2F7            | 0.96685027 | 1.181566 |
| E2F8            | 0.0169696  | 0.006426 |
| E4F1            | 11.3012175 | 11.38093 |
| EA1F1           | 7.64089011 | 7.030354 |
| EA1F2           | 5.73043334 | 5.690276 |
| EAPP            | 27.9037961 | 26.13541 |
| EARS2           | 0.06368096 | 0.0422   |
| EBAG9           | 2.34869433 | 1.936977 |
| EBF1            | 0.019933   | 0.04076  |
| EBF2            | 0          | 0        |
| EBF3            | 0.00482122 | 0.005477 |
| EBF4            | 0.02166815 | 0.049231 |
| EBI3            | 0.03695137 | 0        |
| EBNA1BP2        | 4.34184217 | 4.010964 |
| EBP             | 19.1535859 | 15.483   |
| EBPL            | 0.18402916 | 0.339723 |
| ECD             | 7.42547005 | 7.228927 |
| ECE1            | 13.5563359 | 17.99814 |
| ECE2            | 0.04338101 | 0.071184 |
| ECEL1           | 0.00735409 | 0        |
| ECEL1P2         | 0          | 0        |
| ECEL1P3         | 0          | 0        |
| ECH1            | 36.3406948 | 37.65262 |
| ECHDC1          | 5.0474864  | 4.525284 |
| ECHDC2          | 2.7914482  | 2.256381 |
| ECHDC3          | 17.5295837 | 10.42627 |
| ECHS1           | 2.15157638 | 2.605975 |
| ECM1            | 0.26477796 | 0.389915 |
| ECM2            | 0          | 0        |
| ECOP            | 74.0243055 | 81.82922 |
| ECSCR (NC_0000) | 0          | 0        |
| ECSCR (NC_0000) | 0          | 0        |
| ECSIT           | 1.14797059 | 1.162361 |
| ECT2            | 0.08603716 | 0.103848 |
| ECT2L           | 0.02467183 | 0.022422 |
| EDA             | 0.0682008  | 0.06272  |
| EDA2R           | 0          | 0        |
| EDAR            | 0.0049894  | 0.005668 |

|          |            |          |
|----------|------------|----------|
| EDARADD  | 0.04181372 | 0.063335 |
| EDC3     | 3.17265992 | 2.97023  |
| EDC4     | 16.8976586 | 16.11879 |
| EDEM1    | 30.5009108 | 30.66673 |
| EDEM2    | 26.1140546 | 30.37766 |
| EDEM3    | 10.3034267 | 8.841668 |
| EDF1     | 67.5284159 | 65.50452 |
| EDIL3    | 0          | 0        |
| EDN1     | 0.40048249 | 0.557319 |
| EDN2     | 0          | 0        |
| EDN3     | 0.01582041 | 0        |
| EDNRA    | 0.00975201 | 0        |
| EDNRB    | 0          | 0        |
| EEA1     | 1.52376508 | 1.349003 |
| EED      | 6.25337423 | 5.782502 |
| EEF1A1   | 122.434238 | 105.844  |
| EEF1A1P  | 0          | 0        |
| EEF1A1P2 | 0          | 0        |
| EEF1A2   | 0.04568241 | 0.116766 |
| EEF1AL11 | 0          | 0        |
| EEF1AL12 | 0          | 0        |
| EEF1AL3  | 0          | 0        |
| EEF1AL4  | 0          | 0        |
| EEF1AL5  | 0          | 0        |
| EEF1AL6  | 0          | 0        |
| EEF1AL7  | 0          | 0        |
| EEF1AL9  | 0          | 0        |
| EEF1B1   | 0          | 0        |
| EEF1B2   | 10.7399664 | 8.822428 |
| EEF1B3   | 0          | 0        |
| EEF1B4   | 0          | 0        |
| EEF1D    | 46.5622576 | 46.96914 |
| EEF1DP1  | 0          | 0        |
| EEF1DP2  | 0          | 0        |
| EEF1DP3  | 0          | 0        |
| EEF1DP4  | 0          | 0        |
| EEF1DP5  | 0          | 0        |
| EEF1E1   | 1.40168873 | 1.093535 |
| EEF1G    | 55.5571814 | 55.61286 |
| EEF2     | 78.6286126 | 77.24466 |
| EEF2K    | 2.33457196 | 1.572576 |
| EEFSEC   | 1.82168933 | 2.091025 |
| EEPD1    | 26.2244687 | 16.87806 |
| EFCAB1   | 0          | 0        |
| EFCAB10  | 0          | 0        |
| EFCAB2   | 0.20336658 | 0.147018 |
| EFCAB3   | 0.17970368 | 0.01361  |

|         |            |          |
|---------|------------|----------|
| EFCAB4A | 20.7480738 | 27.32352 |
| EFCAB4B | 4.14732565 | 3.859965 |
| EFCAB5  | 0.55390918 | 0.403172 |
| EFCAB6  | 0          | 0        |
| EFCAB7  | 0.31168428 | 0.20233  |
| EFCAB8  | 0.18047494 | 0.211052 |
| EFEMP1  | 0          | 0        |
| EFEMP2  | 3.61094051 | 6.427396 |
| EFHA1   | 14.9443654 | 15.16717 |
| EFHA2   | 0.40138788 | 0.299989 |
| EFHB    | 0.05151464 | 0.066882 |
| EFHC1   | 0.88139152 | 0.757374 |
| EFHC2   | 0.38145588 | 0.345203 |
| EFHD1   | 0.02251106 | 0.025573 |
| EFHD2   | 319.771725 | 325.8777 |
| EFNA1   | 0.83242051 | 3.263993 |
| EFNA2   | 0.06549947 | 0        |
| EFNA3   | 0.31856562 | 0.268071 |
| EFNA4   | 1.38830745 | 1.178104 |
| EFNA5   | 0.44927605 | 0.528293 |
| EFNB1   | 0.27772878 | 0.279652 |
| EFNB2   | 7.33113692 | 6.150885 |
| EFNB3   | 0.00653163 | 0.01484  |
| EFR3A   | 12.7921621 | 12.53529 |
| EFR3B   | 0.25372483 | 0.249804 |
| EFS     | 0          | 0        |
| EFTUD1  | 4.01107399 | 4.187186 |
| EFTUD2  | 34.144088  | 30.35077 |
| EGF     | 0          | 0        |
| EGFL6   | 0.00882676 | 0.010027 |
| EGFL7   | 2.28893759 | 4.826847 |
| EGFL8   | 0.11597897 | 0.169398 |
| EGFLAM  | 0.00783504 | 0        |
| EGFR    | 0.00319972 | 0.003635 |
| EGLN1   | 7.37087915 | 6.888423 |
| EGLN2   | 65.541163  | 57.96653 |
| EGLN3   | 0.44800485 | 0.140397 |
| EGO     | 0          | 0        |
| EGR1    | 0.17431716 | 0.228493 |
| EGR2    | 0.07349178 | 0.204925 |
| EGR3    | 1.55725225 | 1.945418 |
| EGR4    | 0.03793474 | 0.010774 |
| EHBP1   | 0.32099742 | 0.217905 |
| EHBP1L1 | 20.1404811 | 29.0679  |
| EHD1    | 239.562268 | 273.9015 |
| EHD2    | 0.02346577 | 0.033322 |
| EHD3    | 0.04107656 | 0.059996 |



|          |            |          |
|----------|------------|----------|
| EHD4     | 4.57580094 | 2.95144  |
| EHF      | 0.00581292 | 0.006604 |
| EHHADH   | 0.02765763 | 0.018852 |
| EHMT1    | 20.1354949 | 20.53493 |
| EHMT2    | 6.44854531 | 5.652247 |
| EI24     | 7.13243204 | 7.268003 |
| EID1     | 1.31722542 | 0.799597 |
| EID2     | 3.66773541 | 3.240693 |
| EID2B    | 1.39793085 | 1.588072 |
| EID3     | 0          | 0        |
| EIF1     | 179.936241 | 160.7471 |
| EIF1AD   | 13.0259191 | 13.38274 |
| EIF1AP1  | 0          | 0        |
| EIF1AX   | 5.22904868 | 5.358113 |
| EIF1AY   | 0          | 0        |
| EIF1B    | 35.3815599 | 34.57676 |
| EIF2A    | 1.36591477 | 1.539386 |
| EIF2AK1  | 23.1066739 | 23.62299 |
| EIF2AK2  | 4.82936783 | 4.638439 |
| EIF2AK3  | 6.16706058 | 4.758115 |
| EIF2AK4  | 2.23909094 | 1.928315 |
| EIF2B1   | 22.4551472 | 22.66023 |
| EIF2B2   | 4.91820607 | 4.454208 |
| EIF2B3   | 0.15208196 | 0.244754 |
| EIF2B4   | 11.5217927 | 9.737969 |
| EIF2B5   | 12.5513535 | 12.47828 |
| EIF2C1   | 36.9363162 | 57.98799 |
| EIF2C2   | 23.6924954 | 26.26876 |
| EIF2C3   | 5.62882876 | 6.878052 |
| EIF2C4   | 47.0750002 | 46.73108 |
| EIF2S1   | 3.18030216 | 2.918973 |
| EIF2S2   | 11.2589349 | 11.08557 |
| EIF2S2P  | 0          | 0        |
| EIF2S2P2 | 0          | 0        |
| EIF2S3   | 21.6867339 | 23.0786  |
| EIF3A    | 20.0979177 | 20.34624 |
| EIF3B    | 13.321497  | 11.85736 |
| EIF3C    | 22.9608023 | 20.9689  |
| EIF3CL   | 0.61980995 | 0.844937 |
| EIF3D    | 30.5293415 | 27.57388 |
| EIF3E    | 12.6040446 | 10.29531 |
| EIF3EP   | 0          | 0        |
| EIF3F    | 31.236678  | 31.26363 |
| EIF3FP   | 0          | 0        |
| EIF3G    | 30.6704917 | 33.46459 |
| EIF3H    | 35.6523651 | 38.60958 |
| EIF3I    | 18.8189691 | 18.08584 |

|           |            |          |
|-----------|------------|----------|
| EIF3IP1   | 0          | 0        |
| EIF3J     | 14.4826557 | 15.46276 |
| EIF3K     | 45.4233259 | 43.74861 |
| EIF3L     | 31.8238719 | 29.69401 |
| EIF3LP1   | 0          | 0        |
| EIF3LP2   | 0          | 0        |
| EIF3M     | 15.540462  | 15.44263 |
| EIF4A1    | 115.536702 | 121.0835 |
| EIF4A1P   | 0          | 0        |
| EIF4A1P2  | 0          | 0        |
| EIF4A2    | 69.2579516 | 68.91441 |
| EIF4A3    | 21.3246239 | 23.63011 |
| EIF4B     | 42.2385745 | 39.85398 |
| EIF4BP    | 0          | 0        |
| EIF4E     | 4.72235608 | 4.369459 |
| EIF4E1B   | 0          | 0        |
| EIF4E2    | 26.8182368 | 27.86202 |
| EIF4E2P1  | 0          | 0        |
| EIF4E3    | 5.22591229 | 4.78357  |
| EIF4EBP1  | 17.1825173 | 18.43519 |
| EIF4EBP1P | 0          | 0        |
| EIF4EBP2  | 46.9670884 | 47.4372  |
| EIF4EBP2P | 0          | 0        |
| EIF4EBP3  | 0.30427396 | 0.449358 |
| EIF4ENIF1 | 5.3264968  | 5.155548 |
| EIF4EP1   | 0          | 0        |
| EIF4G1    | 19.2604699 | 18.99814 |
| EIF4G2    | 220.575129 | 219.8761 |
| EIF4G3    | 12.2973857 | 11.93289 |
| EIF4H     | 94.6387639 | 96.52549 |
| EIF5      | 36.8583253 | 34.04355 |
| EIF5A     | 41.2179755 | 41.13547 |
| EIF5A2    | 0.38352148 | 0.470196 |
| EIF5AL1   | 0.66251694 | 0.416745 |
| EIF5AL3   | 0          | 0        |
| EIF5AP1   | 0          | 0        |
| EIF5AP2   | 0          | 0        |
| EIF5AP3   | 0          | 0        |
| EIF5B     | 9.36696843 | 8.88701  |
| EIF6      | 23.4044349 | 22.95606 |
| ELA2A     | 0          | 0        |
| ELA2B     | 0.31891076 | 0.439921 |
| ELAC1     | 0.42370797 | 0.352982 |
| ELAC2     | 5.02399899 | 4.056262 |
| ELANE     | 0.02275469 | 0.077549 |
| ELAVL1    | 5.50795646 | 5.783997 |
| ELAVL2    | 0          | 0.006272 |

|         |            |          |
|---------|------------|----------|
| ELAVL3  | 0.02245336 | 0.015304 |
| ELAVL4  | 0          | 0        |
| ELF1    | 87.683334  | 66.12962 |
| ELF2    | 23.1482205 | 25.53031 |
| ELF2P1  | 0          | 0        |
| ELF2P2  | 0          | 0        |
| ELF2P3  | 0          | 0        |
| ELF2P4  | 0          | 0        |
| ELF3    | 0.12946632 | 0.161783 |
| ELF4    | 83.7272777 | 121.9136 |
| ELF5    | 0          | 0.009337 |
| ELFN1   | 0.0241393  | 0.013711 |
| ELFN2   | 0.26404255 | 0.488501 |
| ELK1    | 3.30840827 | 2.47285  |
| ELK2P1  | 0          | 0        |
| ELK2P2  | 0          | 0        |
| ELK3    | 0.71355145 | 0.932752 |
| ELK4    | 5.57174125 | 4.714764 |
| ELL     | 11.9657635 | 14.1356  |
| ELL2    | 16.6922905 | 17.42199 |
| ELL3    | 0.64678018 | 0.768664 |
| ELMO1   | 21.0566653 | 21.65441 |
| ELMO2   | 10.5954424 | 9.312793 |
| ELMO3   | 3.48190194 | 4.858794 |
| ELMOD1  | 0          | 0        |
| ELMOD2  | 6.16764739 | 5.379696 |
| ELMOD3  | 9.66689692 | 9.183612 |
| ELN     | 0          | 0.006848 |
| ELOF1   | 25.9773226 | 30.3076  |
| ELOVL1  | 28.2275347 | 27.26736 |
| ELOVL2  | 0.31997313 | 0.246238 |
| ELOVL3  | 0          | 0.018191 |
| ELOVL4  | 0          | 0.015611 |
| ELOVL5  | 75.102624  | 66.55608 |
| ELOVL6  | 0.1115731  | 0.126749 |
| ELOVL7  | 0.1571076  | 0.252329 |
| ELP1P   | 0          | 0        |
| ELP2    | 8.3713527  | 8.418208 |
| ELP2P   | 0          | 0        |
| ELP3    | 3.38233585 | 3.085778 |
| ELP4    | 0.92581228 | 1.00601  |
| ELSPBP1 | 0          | 0        |
| ELTD1   | 0          | 0        |
| EMB     | 46.4860358 | 54.58266 |
| EMCN    | 0          | 0        |
| EMD     | 22.5013437 | 20.63859 |
| EME1    | 0.14600924 | 0.041467 |

|         |            |          |
|---------|------------|----------|
| EME2    | 0.99220663 | 0.984031 |
| EMG1    | 2.72587704 | 1.867091 |
| EMID1   | 0.02041294 | 0.023189 |
| EMID2   | 0.06297104 | 0.079485 |
| EMILIN1 | 0.23923314 | 0.240889 |
| EMILIN2 | 0.73423456 | 0.595787 |
| EMILIN3 | 0.00549395 | 0        |
| EML1    | 0.00464956 | 0        |
| EML2    | 7.42620675 | 7.522534 |
| EML3    | 29.674461  | 32.85945 |
| EML4    | 31.6308277 | 30.70758 |
| EML5    | 0.21081747 | 0.195641 |
| EML6    | 0.11244924 | 0.103412 |
| EMP1    | 0.01499667 | 0.008518 |
| EMP2    | 0.00811632 | 0        |
| EMP3    | 135.358494 | 128.2996 |
| EMR1    | 315.258781 | 275.2485 |
| EMR2    | 114.957728 | 108.1726 |
| EMR3    | 127.897244 | 84.40236 |
| EMR4P   | 0          | 0        |
| EMX1    | 0.0576563  | 0.098248 |
| EMX2    | 0.02904051 | 0.024743 |
| EMX2OS  | 0          | 0        |
| EN1     | 0          | 0.024192 |
| EN2     | 0.01238606 | 0.014071 |
| ENAH    | 0.00159621 | 0.001813 |
| ENAM    | 0          | 0        |
| ENC1    | 6.72642906 | 10.39914 |
| ENDOD1  | 0.4431145  | 0.22601  |
| ENDOG   | 3.15839033 | 3.212495 |
| ENG     | 18.3609821 | 25.42464 |
| ENGASE  | 5.30550111 | 5.138756 |
| ENHO    | 0          | 0.088627 |
| ENKUR   | 0.00633675 | 0        |
| ENO1    | 81.0728407 | 89.91188 |
| ENO1P   | 0          | 0        |
| ENO2    | 0.33841845 | 0.552029 |
| ENO3    | 3.78262684 | 8.311955 |
| ENOPH1  | 1.85824673 | 1.968683 |
| ENOSF1  | 3.92096255 | 2.840544 |
| ENOX1   | 0.00674105 | 0.015316 |
| ENOX2   | 1.32162095 | 1.170279 |
| ENPEP   | 0.08839478 | 0.114763 |
| ENPP1   | 0.01412613 | 0.00321  |
| ENPP2   | 2.64149935 | 1.831833 |
| ENPP3   | 0.0265723  | 0.04528  |
| ENPP4   | 0.30549626 | 0.280701 |

|          |            |          |
|----------|------------|----------|
| ENPP5    | 0          | 0        |
| ENPP6    | 0          | 0        |
| ENPP7    | 0.0114144  | 0        |
| ENSA     | 38.0383491 | 33.24323 |
| ENSAP    | 0          | 0        |
| ENSAP2   | 0          | 0        |
| ENTHD1   | 0          | 0        |
| ENTPD1   | 27.9435115 | 25.45287 |
| ENTPD2   | 2.73329302 | 3.685131 |
| ENTPD3   | 0.00752787 | 0.008552 |
| ENTPD4   | 22.1363685 | 18.86844 |
| ENTPD5   | 6.72565278 | 5.051056 |
| ENTPD6   | 3.12867886 | 2.862408 |
| ENTPD7   | 2.93445297 | 2.484833 |
| ENTPD8   | 0.00946235 | 0        |
| ENY2     | 40.8312666 | 36.89809 |
| EOMES    | 0.08397917 | 0.078056 |
| EP300    | 43.5553854 | 43.21185 |
| EP400    | 9.21926049 | 10.83934 |
| EP400NL  | 0          | 0        |
| EPAS1    | 9.93158393 | 9.520573 |
| EPB41    | 84.9167198 | 123.052  |
| EPB41L1  | 0.00664203 | 0.007545 |
| EPB41L2  | 0.24929363 | 0.224424 |
| EPB41L3  | 0.07093566 | 0.085956 |
| EPB41L4A | 0.10720373 | 0.106562 |
| EPB41L4B | 0.01098359 | 0.009358 |
| EPB41L5  | 0.28612453 | 0.317738 |
| EPB42    | 0.0248233  | 0        |
| EPB49    | 0.05125005 | 0.065498 |
| EPC1     | 22.1440836 | 19.65417 |
| EPC2     | 14.6848164 | 13.21192 |
| EPCAM    | 0.09790608 | 0.19464  |
| EPDR1    | 0          | 0        |
| EPF5     | 0          | 0        |
| EPF8     | 0          | 0        |
| EPGN     | 0.0248233  | 0        |
| EPHA1    | 0.28133806 | 0.369321 |
| EPHA10   | 0.00949368 | 0.00719  |
| EPHA2    | 0          | 0.024212 |
| EPHA3    | 0.009451   | 0.010736 |
| EPHA4    | 0.11923628 | 0.090303 |
| EPHA5    | 0.00267566 | 0        |
| EPHA6    | 0          | 0        |
| EPHA7    | 0          | 0        |
| EPHA8    | 0.00777133 | 0.013243 |
| EPHB1    | 0.05121316 | 0.015867 |

|          |            |          |
|----------|------------|----------|
| EPHB2    | 0          | 0        |
| EPHB3    | 0.00996461 | 0.01132  |
| EPHB4    | 0.01932919 | 0.032937 |
| EPHB6    | 2.92784104 | 3.243365 |
| EPHX1    | 1.60885656 | 1.614874 |
| EPHX2    | 0.00957438 | 0.010877 |
| EPHX3    | 0.01084898 | 0.012325 |
| EPHX4    | 0          | 0        |
| EPM2A    | 0.24271666 | 0.23437  |
| EPM2AIP1 | 7.72162981 | 7.477943 |
| EPN1     | 22.1400666 | 25.69315 |
| EPN2     | 29.1441092 | 21.95849 |
| EPN3     | 0.00535404 | 0.012165 |
| EPO      | 0.04742556 | 0.017959 |
| EPOR     | 7.67970693 | 15.67783 |
| EPPK1    | 0.02889683 | 0.006565 |
| EPR1     | 0          | 0        |
| EPRS     | 3.1988689  | 2.848115 |
| EPS15    | 15.9865016 | 16.8477  |
| EPS15L1  | 27.2328818 | 22.15443 |
| EPS15L2  | 0          | 0        |
| EPS8     | 0.05150743 | 0.070216 |
| EPS8L1   | 0.49200043 | 0.410457 |
| EPS8L2   | 1.37223586 | 1.52086  |
| EPS8L3   | 0.01876424 | 0.021316 |
| EPSTI1   | 11.1342026 | 12.99787 |
| EPX      | 1.67479263 | 1.813267 |
| EPYC     | 0          | 0        |
| ERAF     | 0.04155204 | 0        |
| ERAL1    | 1.84331669 | 1.989335 |
| ERAP1    | 15.4495835 | 16.70112 |
| ERAP2    | 2.53441874 | 1.766936 |
| ERAS     | 0.03321537 | 0.0566   |
| ERBB2    | 0.21734787 | 0.181689 |
| ERBB2IP  | 23.4209297 | 25.6499  |
| ERBB3    | 0.0070709  | 0.004016 |
| ERBB4    | 0          | 0.002003 |
| ERC1     | 1.73565801 | 1.593456 |
| ERC2     | 0          | 0        |
| ERCC1    | 4.79941198 | 5.705799 |
| ERCC2    | 0.25021881 | 0.276357 |
| ERCC3    | 8.830639   | 7.782203 |
| ERCC4    | 0.63750819 | 0.533449 |
| ERCC5    | 39.1658387 | 36.52159 |
| ERCC6    | 10.2965901 | 8.778783 |
| ERCC6L   | 0.10994944 | 0.096517 |
| ERCC8    | 0.19544094 | 0.245395 |

|                |            |          |
|----------------|------------|----------|
| EREG           | 0.94950177 | 0.438685 |
| ERF            | 21.0097854 | 22.62242 |
| ERG            | 0.00800812 | 0.009097 |
| ERGIC1         | 85.9632401 | 83.30501 |
| ERGIC2         | 8.69646497 | 8.804022 |
| ERGIC3         | 16.1614916 | 16.19152 |
| ERH            | 29.5299592 | 28.05979 |
| ERI1           | 4.69709994 | 6.572934 |
| ERI2           | 2.22397725 | 2.248277 |
| ERI3           | 1.25452348 | 1.109979 |
| ERICH1         | 4.4737232  | 3.901235 |
| ERLIN1         | 8.94427975 | 6.027274 |
| ERLIN2         | 7.55581762 | 6.028722 |
| ERMAP          | 2.07850415 | 1.835741 |
| ERMN           | 14.2429661 | 13.26209 |
| ERMP1          | 2.07851989 | 1.560738 |
| ERN1           | 2.79812769 | 2.797033 |
| ERN2           | 0.011613   | 0.013193 |
| ERO1L          | 30.3120481 | 29.13117 |
| ERO1LB         | 10.0867641 | 9.152464 |
| ERP27          | 8.80161967 | 9.361221 |
| ERP28P         | 0          | 0        |
| ERP29          | 35.4231119 | 29.66167 |
| ERP44          | 13.6305724 | 13.06754 |
| ERRFI1         | 7.82822326 | 9.816635 |
| ERV3 (NC_00000 | 0.38388947 | 0.167733 |
| ERV3 (NC_00000 | 3.96872631 | 3.486939 |
| ERVWE1         | 0.13814278 | 0.109853 |
| ESAM           | 0.02249902 | 0.025559 |
| ESCO1          | 8.00542164 | 8.584624 |
| ESCO2          | 0.15648505 | 0.120883 |
| ESD            | 6.12062906 | 4.54859  |
| ESF1           | 1.05911182 | 1.114044 |
| ESM1           | 0          | 0        |
| ESP33          | 0          | 0        |
| ESPL1          | 0.22222153 | 0.281298 |
| ESPN           | 0.03572699 | 0.033822 |
| ESPNL          | 0          | 0.0051   |
| ESPNP          | 0          | 0        |
| ESR1           | 0.04223771 | 0.054837 |
| ESR2           | 0.4323658  | 0.442057 |
| ESRP1          | 0          | 0.006276 |
| ESRP2          | 3.84322762 | 4.152124 |
| ESRRA          | 27.5856886 | 29.93973 |
| ESRRAP1        | 0          | 0        |
| ESRRAP2        | 0          | 0        |
| ESRRB          | 0.00958747 | 0.010892 |

|         |            |          |
|---------|------------|----------|
| ESRRG   | 0.0036332  | 0        |
| ESSPL   | 0          | 0.0242   |
| ESX1    | 0          | 0        |
| ETAA1   | 2.27352802 | 1.942529 |
| ETF1    | 33.4102711 | 34.43884 |
| ETF1P1  | 0          | 0        |
| ETF1P2  | 0          | 0        |
| ETF1P3  | 0          | 0        |
| ETFA    | 12.1341762 | 11.40492 |
| ETFB    | 2.62454131 | 2.289676 |
| ETFDH   | 6.74887167 | 5.877221 |
| ETHE1   | 0.45849631 | 0.372042 |
| ETNK1   | 5.04769101 | 4.459251 |
| ETNK2   | 0.04027841 | 0.018303 |
| ETS1    | 45.2342484 | 38.20497 |
| ETS2    | 2.17009816 | 3.571058 |
| ETV1    | 0          | 0.003879 |
| ETV2    | 0.02827886 | 0.016063 |
| ETV3    | 4.85807135 | 4.654743 |
| ETV3L   | 0.01064035 | 0        |
| ETV4    | 0.05961009 | 0.067718 |
| ETV5    | 0.09738695 | 0.122279 |
| ETV6    | 31.2659204 | 30.72082 |
| ETV7    | 0.05172283 | 0.088137 |
| EVC     | 0.01307952 | 0        |
| EVC2    | 0.00954395 | 0.010842 |
| EVI1    | 0.00714783 | 0.00406  |
| EVI2A   | 0.93282262 | 0.209152 |
| EVI2B   | 138.914731 | 83.01722 |
| EVI5    | 3.87390942 | 4.239502 |
| EVI5L   | 0.98617875 | 0.985877 |
| EVL     | 58.7841772 | 52.98293 |
| EVPL    | 0.03191943 | 0.014504 |
| EVPLL   | 0.01055489 | 0.035972 |
| EVX1    | 0.01131611 | 0        |
| EVX2    | 0.03900804 | 0.029542 |
| EWSR1   | 55.2431824 | 51.01332 |
| EXD1    | 0          | 0        |
| EXD2    | 0.88379173 | 0.767766 |
| EXD3    | 1.99233438 | 2.395972 |
| EXO1    | 0.03909265 | 0.022205 |
| EXOC1   | 10.6124507 | 9.668735 |
| EXOC2   | 5.59949719 | 5.463141 |
| EXOC3   | 121.755227 | 109.3928 |
| EXOC3L  | 0.06736189 | 0.076524 |
| EXOC3L2 | 0.01223114 | 0.02779  |
| EXOC4   | 4.79364015 | 4.962569 |



|          |            |          |
|----------|------------|----------|
| EXOC5    | 6.10922847 | 5.217062 |
| EXOC6    | 4.71548821 | 3.923251 |
| EXOC6B   | 0.20263426 | 0.377521 |
| EXOC7    | 18.1892987 | 16.91316 |
| EXOC8    | 14.3510156 | 12.84932 |
| EXOG     | 0.41435808 | 0.311281 |
| EXOSC1   | 11.3353958 | 10.84176 |
| EXOSC10  | 13.6724552 | 12.46993 |
| EXOSC2   | 3.87157416 | 3.222421 |
| EXOSC3   | 6.50374395 | 5.902867 |
| EXOSC3P1 | 0          | 0        |
| EXOSC3P2 | 0          | 0        |
| EXOSC4   | 3.59427445 | 5.337455 |
| EXOSC5   | 0.08460898 | 0.048059 |
| EXOSC6   | 5.36764332 | 5.015873 |
| EXOSC7   | 1.03503077 | 0.806929 |
| EXOSC8   | 7.45050707 | 6.551054 |
| EXOSC9   | 7.92926107 | 6.784882 |
| EXPH5    | 0.01188096 | 0.013497 |
| EXT1     | 0.33760567 | 0.326707 |
| EXT2     | 19.0377238 | 16.19672 |
| EXTL1    | 0          | 0.011898 |
| EXTL2    | 0.31315872 | 0.239927 |
| EXTL3    | 3.99930955 | 3.660939 |
| EYA1     | 0.01844732 | 0.010478 |
| EYA2     | 0.01354725 | 0        |
| EYA3     | 6.55949201 | 6.225312 |
| EYA4     | 0.00362881 | 0.008245 |
| EYS      | 0.02893324 | 0.038058 |
| EZH1     | 27.388141  | 24.1473  |
| EZH2     | 3.83702502 | 4.020882 |
| EZR      | 30.5341773 | 28.54186 |
| F10      | 0          | 0        |
| F11      | 0.00641407 | 0.014573 |
| F11R     | 112.05239  | 107.9033 |
| F12      | 4.08000084 | 4.506844 |
| F13A1    | 0.05442747 | 0.074197 |
| F13B     | 0          | 0        |
| F2       | 0.01046036 | 0.011883 |
| F2R      | 0.09381381 | 0.087767 |
| F2RL1    | 1.516916   | 1.267576 |
| F2RL2    | 0          | 0        |
| F2RL3    | 0.03079507 | 0        |
| F3       | 0.00894314 | 0.020319 |
| F5       | 10.8207499 | 7.720571 |
| F7       | 0          | 0        |
| F8       | 0.12791076 | 0.12455  |

|          |            |          |
|----------|------------|----------|
| F8A1     | 1.39592385 | 1.50159  |
| F8A2     | 1.45067248 | 1.819206 |
| F8A3     | 1.05503453 | 1.605182 |
| F9       | 0          | 0        |
| FA2H     | 0          | 0.019723 |
| FAAH     | 11.4710994 | 9.474237 |
| FAAH2    | 0          | 0        |
| FABP1    | 0          | 0        |
| FABP12   | 0          | 0        |
| FABP2    | 0          | 0        |
| FABP3    | 0.53665384 | 0.479009 |
| FABP3P2  | 0          | 0        |
| FABP4    | 0          | 0        |
| FABP5    | 0          | 0        |
| FABP5L1  | 0          | 0        |
| FABP5L10 | 0          | 0        |
| FABP5L11 | 0          | 0        |
| FABP5L12 | 0          | 0        |
| FABP5L2  | 0          | 0        |
| FABP5L3  | 0          | 0        |
| FABP5L6  | 0          | 0        |
| FABP5L7  | 0          | 0        |
| FABP5L8  | 0          | 0        |
| FABP5L9  | 0          | 0        |
| FABP6    | 0.14550402 | 0.082647 |
| FABP7    | 0.02102533 | 0        |
| FABP9    | 0          | 0.059862 |
| FADD     | 8.99788853 | 9.487016 |
| FADS1    | 6.98783058 | 6.976397 |
| FADS2    | 9.42100412 | 9.701192 |
| FADS3    | 21.4035269 | 21.01191 |
| FADS6    | 0.01024626 | 0        |
| FAF1     | 5.64908234 | 4.873191 |
| FAF2     | 7.50671839 | 7.53849  |
| FAH      | 30.3828383 | 32.35302 |
| FAHD1    | 0.45125301 | 0.330169 |
| FAHD2A   | 1.16627414 | 0.864869 |
| FAHD2B   | 0.18282896 | 0.226578 |
| FAHD2P   | 0          | 0        |
| FAIM     | 0.18987355 | 0.215699 |
| FAIM2    | 0.01341186 | 0        |
| FAIM3    | 0.24409703 | 0.194858 |
| FAM100A  | 27.8652548 | 27.83781 |
| FAM100B  | 37.9884992 | 40.19433 |
| FAM101A  | 0          | 0        |
| FAM101B  | 220.635401 | 101.3749 |
| FAM102A  | 131.645043 | 164.0994 |

|           |            |          |
|-----------|------------|----------|
| FAM102B   | 7.61872948 | 10.73935 |
| FAM103A1  | 5.15542583 | 5.502329 |
| FAM103A2P | 0          | 0        |
| FAM104A   | 14.7716054 | 14.47332 |
| FAM104B   | 0.60187016 | 0.433032 |
| FAM105A   | 0.13122192 | 0.274425 |
| FAM105B   | 13.2792965 | 12.98314 |
| FAM106A   | 0          | 0        |
| FAM107A   | 0.00606792 | 0.013786 |
| FAM107B   | 42.3228525 | 30.76983 |
| FAM108A1  | 58.4445389 | 82.70706 |
| FAM108A2  | 0          | 0        |
| FAM108A5  | 0.16139472 | 0.366694 |
| FAM108B1  | 6.97189655 | 5.89801  |
| FAM108C1  | 0.04454519 | 0.050604 |
| FAM109A   | 0.44862967 | 0.517257 |
| FAM109B   | 0.6671846  | 0.522359 |
| FAM10A3   | 0          | 0        |
| FAM10A4   | 0          | 0        |
| FAM10A5   | 0          | 0        |
| FAM10A6   | 0          | 0        |
| FAM10A7   | 0          | 0        |
| FAM110A   | 22.358538  | 13.77987 |
| FAM110B   | 23.3358069 | 26.05052 |
| FAM110C   | 0          | 0        |
| FAM111A   | 9.11524369 | 7.428499 |
| FAM111B   | 0.035426   | 0.02683  |
| FAM113A   | 4.54374336 | 4.205882 |
| FAM113B   | 0.12159228 | 0.241729 |
| FAM114A1  | 0.09926974 | 0.214267 |
| FAM114A2  | 5.84279814 | 5.652644 |
| FAM115A   | 1.176098   | 0.97861  |
| FAM115B   | 0          | 0        |
| FAM115C   | 0.63860365 | 0.66238  |
| FAM115D   | 0          | 0        |
| FAM116A   | 8.36409151 | 9.527379 |
| FAM116B   | 0.59742964 | 0.738224 |
| FAM117A   | 23.5544263 | 15.31641 |
| FAM117B   | 1.25082053 | 1.285415 |
| FAM118A   | 9.43139846 | 10.1178  |
| FAM118B   | 2.83217928 | 2.426683 |
| FAM119A   | 6.31697038 | 4.335709 |
| FAM119B   | 0.051823   | 0.025231 |
| FAM120A   | 24.4779473 | 26.12088 |
| FAM120AOS | 8.95762744 | 9.09621  |
| FAM120B   | 10.749598  | 9.682355 |
| FAM120C   | 0.12745778 | 0.067965 |

|          |            |          |
|----------|------------|----------|
| FAM122A  | 0          | 0        |
| FAM122B  | 8.82051986 | 8.698267 |
| FAM122C  | 3.14045272 | 2.568675 |
| FAM123A  | 0          | 0.014938 |
| FAM123B  | 0.27890999 | 0.200858 |
| FAM123C  | 0.00324766 | 0        |
| FAM124A  | 0          | 0.011352 |
| FAM124B  | 6.38703192 | 5.119553 |
| FAM125A  | 3.87726137 | 3.163325 |
| FAM125B  | 0.12452076 | 0.265233 |
| FAM126A  | 6.20060972 | 4.686933 |
| FAM126B  | 4.99895097 | 4.918802 |
| FAM127A  | 8.23097764 | 7.776101 |
| FAM127B  | 4.02151172 | 2.559119 |
| FAM127C  | 0          | 0        |
| FAM128A  | 28.2158121 | 27.19387 |
| FAM128B  | 47.6880968 | 48.55441 |
| FAM129A  | 56.2668942 | 56.07104 |
| FAM129B  | 0.06280905 | 0.154596 |
| FAM129C  | 0.55068164 | 0.590828 |
| FAM12A   | 0          | 0        |
| FAM12B   | 0.02346577 | 0        |
| FAM12CP  | 0          | 0        |
| FAM131A  | 6.70729215 | 5.872216 |
| FAM131B  | 0.09466606 | 0.161313 |
| FAM131C  | 0          | 0        |
| FAM132A  | 1.86711433 | 1.89052  |
| FAM132B  | 0          | 0        |
| FAM133A  | 0          | 0        |
| FAM133B  | 1.58456708 | 1.558145 |
| FAM134A  | 22.4835247 | 22.13022 |
| FAM134B  | 0.36999884 | 0.386965 |
| FAM134C  | 34.698144  | 34.1816  |
| FAM135A  | 0.14482749 | 0.189205 |
| FAM135B  | 0.00906004 | 0        |
| FAM136A  | 8.91278557 | 7.86477  |
| FAM136B  | 0          | 0        |
| FAM138A  | 0          | 0        |
| FAM138B  | 0          | 0        |
| FAM138C  | 0          | 0        |
| FAM138D  | 0          | 0        |
| FAM138E  | 0          | 0        |
| FAM138F  | 0          | 0        |
| FAM13A   | 1.14141428 | 1.413481 |
| FAM13AOS | 0          | 0        |
| FAM13B   | 19.5972235 | 17.23856 |
| FAM13C   | 0          | 0        |

|          |            |          |
|----------|------------|----------|
| FAM148A  | 0.00610314 | 0.006933 |
| FAM148B  | 0.98723001 | 2.000529 |
| FAM148C  | 0.01346052 | 0.007646 |
| FAM149A  | 0          | 0.008833 |
| FAM149B1 | 2.59795756 | 2.775919 |
| FAM150A  | 0          | 0        |
| FAM150B  | 0.01503958 | 0.017085 |
| FAM151A  | 0.01061349 | 0.012057 |
| FAM151B  | 3.14898678 | 2.561908 |
| FAM153A  | 0.02343961 | 0        |
| FAM153B  | 0          | 0        |
| FAM153C  | 0          | 0        |
| FAM154A  | 0.01130394 | 0        |
| FAM154B  | 0.02014564 | 0.030514 |
| FAM155A  | 0.00603829 | 0        |
| FAM155B  | 0          | 0        |
| FAM156A  | 1.65325792 | 1.878127 |
| FAM156B  | 0.06180285 | 0.014042 |
| FAM157A  | 9.482012   | 9.909979 |
| FAM157B  | 0.06580698 | 0.186894 |
| FAM157C  | 12.1545037 | 12.1931  |
| FAM158A  | 2.94606434 | 3.375381 |
| FAM159A  | 29.3390721 | 42.46622 |
| FAM159B  | 0.1033529  | 0.111064 |
| FAM160A1 | 0.03675757 | 0.036538 |
| FAM160A2 | 9.69983052 | 8.105342 |
| FAM160B1 | 5.86506874 | 5.881922 |
| FAM160B2 | 4.20281267 | 5.721674 |
| FAM161A  | 0.07403286 | 0.045286 |
| FAM161B  | 0.80305084 | 0.787877 |
| FAM162A  | 5.51977662 | 6.555579 |
| FAM162B  | 0          | 0        |
| FAM163A  | 0.01445537 | 0        |
| FAM163B  | 0          | 0.047675 |
| FAM164A  | 0.05017979 | 0.042754 |
| FAM164B  | 0          | 0        |
| FAM164C  | 0.06076685 | 0.092043 |
| FAM165B  | 3.41077591 | 2.919291 |
| FAM166A  | 0.01870581 | 0.02125  |
| FAM166B  | 0          | 0.026867 |
| FAM167A  | 0.0256845  | 0        |
| FAM167B  | 0.10996512 | 0.049969 |
| FAM168A  | 11.2444469 | 16.34244 |
| FAM168B  | 26.8281045 | 26.23121 |
| FAM169A  | 0.02476899 | 0.028138 |
| FAM169B  | 0.00637518 | 0        |
| FAM170A  | 0          | 0.017878 |

|           |            |          |
|-----------|------------|----------|
| FAM170B   | 0.13279156 | 0.167615 |
| FAM171A1  | 0.00532017 | 0.012088 |
| FAM171A2  | 0.03192913 | 0.099748 |
| FAM171B   | 0          | 0.01343  |
| FAM172A   | 4.10285637 | 3.833886 |
| FAM172B   | 0          | 0        |
| FAM173A   | 4.16585812 | 4.537614 |
| FAM173B   | 0.86561493 | 0.957475 |
| FAM174A   | 2.22841291 | 2.087048 |
| FAM174B   | 0.11192191 | 0.063573 |
| FAM175A   | 2.0988118  | 2.198276 |
| FAM175B   | 6.43202201 | 6.117016 |
| FAM176A   | 0.01000254 | 0        |
| FAM176B   | 0.19948132 | 0.271937 |
| FAM177A1  | 5.29860887 | 6.994061 |
| FAM177B   | 0.01563222 | 0.017758 |
| FAM178A   | 5.15946807 | 4.32068  |
| FAM178B   | 0.01467225 | 0.008334 |
| FAM179A   | 1.1140818  | 1.029995 |
| FAM179B   | 1.87954737 | 1.649228 |
| FAM180A   | 0          | 0        |
| FAM180B   | 0          | 0.016645 |
| FAM181A   | 0.02328387 | 0.039676 |
| FAM181B   | 0.0338936  | 0        |
| FAM182A   | 0          | 0        |
| FAM182B   | 0          | 0        |
| FAM183A   | 0          | 0        |
| FAM183B   | 0.11489252 | 0.029004 |
| FAM184A   | 0.02021666 | 0.011483 |
| FAM184B   | 1.6198504  | 1.369289 |
| FAM185A   | 1.09875512 | 0.729882 |
| FAM185B   | 0          | 0        |
| FAM186A   | 0          | 0        |
| FAM186B   | 0.01462123 | 0.008305 |
| FAM187B   | 0          | 0        |
| FAM18A    | 0.05667205 | 0.04292  |
| FAM18B    | 5.3121574  | 4.979959 |
| FAM18B2   | 1.9018294  | 1.760584 |
| FAM197Y1  | 0.03915332 | 0.022239 |
| FAM197Y10 | 0          | 0.056466 |
| FAM197Y2P | 0          | 0        |
| FAM197Y3  | 0          | 0        |
| FAM197Y4  | 0          | 0        |
| FAM197Y5  | 0          | 0        |
| FAM197Y6  | 0          | 0        |
| FAM197Y7  | 0          | 0        |
| FAM197Y8  | 0          | 0        |

|          |            |          |
|----------|------------|----------|
| FAM197Y9 | 0          | 0        |
| FAM199YP | 0          | 0        |
| FAM19A1  | 0          | 0        |
| FAM19A2  | 0.29029057 | 0.288553 |
| FAM19A3  | 0          | 0        |
| FAM19A4  | 0          | 0        |
| FAM19A5  | 0.02933426 | 0        |
| FAM201C  | 0          | 0        |
| FAM202B  | 0          | 0        |
| FAM202C  | 0          | 0        |
| FAM20A   | 0.96454981 | 1.190568 |
| FAM20B   | 3.50422183 | 3.117196 |
| FAM20C   | 0.25221226 | 0.173647 |
| FAM21A   | 4.84680682 | 4.800539 |
| FAM21B   | 3.7180717  | 3.257562 |
| FAM21C   | 17.2480529 | 14.38793 |
| FAM21D   | 0.04207871 | 0.015934 |
| FAM22A   | 0.85635087 | 0.79133  |
| FAM22B   | 2.1903419  | 2.172381 |
| FAM22D   | 0.53862475 | 0.715304 |
| FAM22E   | 0.60244501 | 0.342194 |
| FAM22F   | 0.01641963 | 0.046632 |
| FAM22G   | 0.2623865  | 0.288302 |
| FAM23A   | 0.02693582 | 0.104913 |
| FAM24A   | 0          | 0        |
| FAM24B   | 1.22556981 | 0.773482 |
| FAM25A   | 0          | 0        |
| FAM25B   | 0          | 0        |
| FAM25C   | 0          | 0        |
| FAM25G   | 0          | 0        |
| FAM26D   | 0          | 0        |
| FAM26E   | 0          | 0        |
| FAM26F   | 5.23263422 | 3.532153 |
| FAM27A   | 0          | 0        |
| FAM27B   | 0          | 0        |
| FAM27E3  | 0          | 0.139679 |
| FAM27L   | 0.03429907 | 0        |
| FAM32A   | 68.7785154 | 65.25959 |
| FAM32B   | 0          | 0        |
| FAM32D   | 0          | 0        |
| FAM32E   | 0          | 0        |
| FAM33A   | 1.89742421 | 1.738065 |
| FAM35A   | 2.06300251 | 1.985748 |
| FAM35A2  | 0          | 0        |
| FAM35B   | 0          | 0        |
| FAM35B2  | 0          | 0        |
| FAM36A   | 13.4462457 | 11.83299 |

|          |            |          |
|----------|------------|----------|
| FAM38A   | 32.1582359 | 42.56865 |
| FAM38B   | 0          | 0        |
| FAM3A    | 5.48543815 | 5.309455 |
| FAM3B    | 0.04557514 | 0.017258 |
| FAM3C    | 0.83538884 | 1.052373 |
| FAM3C2   | 0          | 0        |
| FAM3D    | 0          | 0        |
| FAM40A   | 19.2914824 | 17.44155 |
| FAM40B   | 0.19918735 | 0.138282 |
| FAM41AY1 | 0          | 0        |
| FAM41AY2 | 0          | 0        |
| FAM41C   | 0          | 0        |
| FAM43A   | 7.63463528 | 18.27268 |
| FAM43B   | 0          | 0.009251 |
| FAM45A   | 14.2513586 | 11.09968 |
| FAM45B   | 0          | 0        |
| FAM46A   | 13.0303102 | 10.3976  |
| FAM46B   | 1.133632   | 1.992103 |
| FAM46C   | 7.08685981 | 7.55805  |
| FAM46D   | 0          | 0        |
| FAM47A   | 0          | 0        |
| FAM47B   | 0          | 0        |
| FAM47C   | 0          | 0        |
| FAM47DP  | 0          | 0        |
| FAM47E   | 0          | 0.01541  |
| FAM48A   | 16.3761654 | 16.3885  |
| FAM48B1  | 0          | 0.017932 |
| FAM48B2  | 0.01713556 | 0.038933 |
| FAM49A   | 18.6762135 | 13.21057 |
| FAM49B   | 113.197854 | 122.8517 |
| FAM50A   | 26.9913288 | 29.13218 |
| FAM50B   | 0.23390356 | 0.339529 |
| FAM53A   | 0.0080066  | 0.054574 |
| FAM53B   | 17.9631051 | 23.18187 |
| FAM53C   | 13.529033  | 9.666575 |
| FAM54A   | 0.2814322  | 0.30639  |
| FAM54B   | 41.5606833 | 35.86245 |
| FAM55A   | 0          | 0.025302 |
| FAM55B   | 0          | 0        |
| FAM55C   | 3.87155934 | 3.801883 |
| FAM55D   | 0          | 0.011043 |
| FAM57A   | 1.07148321 | 1.159806 |
| FAM57B   | 0          | 0        |
| FAM58A   | 5.30530478 | 4.598996 |
| FAM58AP1 | 0          | 0        |
| FAM58B   | 0          | 0        |
| FAM59A   | 0.02064681 | 0        |



|         |            |          |
|---------|------------|----------|
| FAM59B  | 0          | 0        |
| FAM5B   | 0          | 0        |
| FAM5C   | 0          | 0        |
| FAM60A  | 5.63915621 | 6.1112   |
| FAM62A  | 163.528113 | 128.856  |
| FAM62B  | 21.7100572 | 22.46171 |
| FAM62C  | 0.01418394 | 0        |
| FAM63A  | 18.2633827 | 12.39359 |
| FAM63B  | 2.03416827 | 1.529447 |
| FAM64A  | 0.05671027 | 0.016106 |
| FAM65A  | 16.4999772 | 28.38631 |
| FAM65B  | 11.4836735 | 7.133905 |
| FAM65C  | 0.05890824 | 0.01673  |
| FAM66A  | 0          | 0        |
| FAM66C  | 0          | 0        |
| FAM66D  | 0          | 0        |
| FAM66E  | 0          | 0        |
| FAM69A  | 0.15370577 | 0.303274 |
| FAM69B  | 0.85531097 | 1.682254 |
| FAM70A  | 0.03607435 | 0.034151 |
| FAM70B  | 0.75454631 | 0.579173 |
| FAM71A  | 0.01826701 | 0.010376 |
| FAM71B  | 0          | 0        |
| FAM71C  | 0          | 0        |
| FAM71D  | 0          | 0.040853 |
| FAM71E1 | 0          | 0        |
| FAM71E2 | 0.02642203 | 0        |
| FAM71F1 | 0          | 0        |
| FAM71F2 | 0.40365827 | 0.319    |
| FAM72A  | 0.02252312 | 0.025587 |
| FAM72B  | 0          | 0        |
| FAM72D  | 0.00878618 | 0.019962 |
| FAM73A  | 3.7301072  | 3.583448 |
| FAM73B  | 12.9246877 | 13.82367 |
| FAM74A1 | 0          | 0        |
| FAM74A2 | 0          | 0        |
| FAM74A3 | 0          | 0        |
| FAM74A4 | 0          | 0        |
| FAM74A5 | 0          | 0        |
| FAM74A6 | 0          | 0        |
| FAM74A7 | 0          | 0        |
| FAM75A1 | 0          | 0        |
| FAM75A2 | 0          | 0        |
| FAM75A3 | 0          | 0        |
| FAM75A4 | 0.00490444 | 0        |
| FAM75A5 | 0          | 0        |
| FAM75A6 | 0.0049894  | 0        |

|          |            |          |
|----------|------------|----------|
| FAM75A7  | 0          | 0        |
| FAM75B   | 0          | 0        |
| FAM75C1  | 0          | 0        |
| FAM76A   | 4.45771026 | 5.719456 |
| FAM76B   | 14.8896168 | 13.61409 |
| FAM78A   | 27.8788624 | 47.81877 |
| FAM78B   | 0.01315728 | 0.014947 |
| FAM7A1   | 0          | 0        |
| FAM7A3   | 0          | 0        |
| FAM81A   | 0.00606267 | 0        |
| FAM81B   | 0.01345191 | 0        |
| FAM82A1  | 0.32835529 | 0.721968 |
| FAM82A2  | 2.91421735 | 3.353041 |
| FAM82B   | 6.58070901 | 5.402213 |
| FAM83A   | 0.00584687 | 0.013284 |
| FAM83B   | 0          | 0        |
| FAM83C   | 0.00664098 | 0.015089 |
| FAM83D   | 0.32892654 | 0.521165 |
| FAM83E   | 0.02091032 | 0        |
| FAM83F   | 0.02030452 | 0.011533 |
| FAM83G   | 0.05023117 | 0.024456 |
| FAM83H   | 0.05268563 | 0.106878 |
| FAM84A   | 0          | 0        |
| FAM84B   | 0.20494875 | 0.251086 |
| FAM86A   | 0.1328475  | 0.140856 |
| FAM86B1  | 0.05174405 | 0.039188 |
| FAM86B2  | 0.09948895 | 0.037674 |
| FAM86C   | 0.05755109 | 0.021793 |
| FAM86D   | 0          | 0        |
| FAM87A   | 0          | 0        |
| FAM89A   | 0.21053402 | 0.271059 |
| FAM89B   | 20.462925  | 30.38881 |
| FAM8A1   | 15.774537  | 14.33107 |
| FAM8A10P | 0          | 0        |
| FAM8A2P  | 0          | 0        |
| FAM8A3P  | 0          | 0        |
| FAM8A6P  | 0          | 0        |
| FAM8A7P  | 0          | 0        |
| FAM8A8P  | 0          | 0        |
| FAM8A9P  | 0          | 0        |
| FAM90A1  | 0.0501399  | 0.018987 |
| FAM90A10 | 0          | 0        |
| FAM90A11 | 0          | 0        |
| FAM90A12 | 0          | 0        |
| FAM90A13 | 0          | 0        |
| FAM90A14 | 0          | 0        |
| FAM90A15 | 0          | 0        |

|           |            |          |
|-----------|------------|----------|
| FAM90A16  | 0          | 0        |
| FAM90A17  | 0          | 0        |
| FAM90A18  | 0          | 0        |
| FAM90A19  | 0          | 0        |
| FAM90A20  | 0          | 0        |
| FAM90A21P | 0          | 0        |
| FAM90A22  | 0          | 0        |
| FAM90A23  | 0          | 0        |
| FAM90A24P | 0          | 0        |
| FAM90A25P | 0          | 0        |
| FAM90A2P  | 0          | 0        |
| FAM90A3   | 0          | 0        |
| FAM90A4P  | 0          | 0        |
| FAM90A5   | 0          | 0        |
| FAM90A6P  | 0          | 0        |
| FAM90A7   | 0          | 0        |
| FAM90A8   | 0          | 0        |
| FAM90A9   | 0          | 0        |
| FAM91A1   | 30.8432052 | 26.63418 |
| FAM91A3P  | 0          | 0        |
| FAM92A1   | 0.43100055 | 0.489623 |
| FAM92A2   | 0          | 0        |
| FAM92A3   | 0          | 0        |
| FAM92B    | 0          | 0        |
| FAM95B1   | 0          | 0        |
| FAM96A    | 12.2647764 | 9.033471 |
| FAM96B    | 32.2206371 | 31.15749 |
| FAM98A    | 2.77273946 | 1.792471 |
| FAM98B    | 2.79271511 | 2.389909 |
| FAM98C    | 8.83888423 | 7.530834 |
| FAM99A    | 0          | 0        |
| FAM99B    | 0          | 0        |
| FAM9A     | 0          | 0        |
| FAM9B     | 0.0395213  | 0        |
| FAM9C     | 0.33285484 | 0.546185 |
| FANCA     | 3.46963883 | 4.347314 |
| FANCB     | 0.15377569 | 0.134989 |
| FANCC     | 0.2472491  | 0.260073 |
| FANCD2    | 6.69260997 | 6.108837 |
| FANCE     | 0.46905826 | 0.373935 |
| FANCF     | 2.05869061 | 2.273741 |
| FANCG     | 1.66220784 | 1.343594 |
| FANCI     | 2.79806468 | 2.484574 |
| FANCL     | 3.93314505 | 3.433829 |
| FANCM     | 1.13267776 | 0.94495  |
| FANK1     | 0.0324465  | 0        |
| FAP       | 0          | 0        |

|         |            |          |
|---------|------------|----------|
| FAR1    | 19.8774077 | 14.31748 |
| FAR2    | 14.5922822 | 12.4271  |
| FARP1   | 0.17582158 | 0.274637 |
| FARP2   | 2.39868674 | 2.300667 |
| FARS2   | 0.12562664 | 0.19461  |
| FARSA   | 12.8103609 | 12.9802  |
| FARSB   | 0.27305625 | 0.203232 |
| FAS     | 4.74614202 | 3.117766 |
| FASLG   | 0.01130394 | 0.064207 |
| FASN    | 12.8767101 | 23.86534 |
| FASTK   | 8.3896974  | 7.59629  |
| FASTKD1 | 1.74046124 | 1.302247 |
| FASTKD2 | 0.50557671 | 0.453972 |
| FASTKD3 | 3.94772034 | 3.301356 |
| FASTKD5 | 0.36719055 | 0.317022 |
| FAT1    | 0.00142409 | 0.003236 |
| FAT1P1  | 0          | 0        |
| FAT2    | 0.09546449 | 0.101876 |
| FAT3    | 0.00110381 | 0.002508 |
| FAT4    | 0.00261022 | 0        |
| FATE1   | 0          | 0        |
| FAU     | 249.938622 | 249.2582 |
| FAUP1   | 0          | 0        |
| FAUP2   | 0          | 0        |
| FAUP3   | 0          | 0        |
| FBF1    | 0.94728317 | 1.026652 |
| FBL     | 1.91303441 | 1.414655 |
| FBLIM1  | 0.02786288 | 0.050644 |
| FBLL1   | 0          | 0        |
| FBLN1   | 0.00432887 | 0.009835 |
| FBLN2   | 0.00486247 | 0.022095 |
| FBLN5   | 0.00798531 | 0        |
| FBLN7   | 0.0365817  | 0.010389 |
| FBN1    | 9.34077365 | 5.78124  |
| FBN2    | 0          | 0        |
| FBN3    | 0.00234475 | 0.002664 |
| FBP1    | 77.1473298 | 80.89391 |
| FBP2    | 0.04833409 | 0.036606 |
| FBRS    | 70.5631349 | 74.67177 |
| FBRS1   | 47.8525068 | 55.01768 |
| FBXL12  | 10.6602515 | 12.25208 |
| FBXL13  | 0.81213725 | 0.651678 |
| FBXL14  | 4.6911089  | 8.93853  |
| FBXL15  | 4.20150559 | 4.226916 |
| FBXL16  | 0.06770452 | 0.083906 |
| FBXL17  | 2.15233445 | 2.276011 |
| FBXL18  | 1.67098875 | 1.494815 |

|          |            |          |
|----------|------------|----------|
| FBXL19   | 4.99600857 | 4.209467 |
| FBXL2    | 0.05327364 | 0.020173 |
| FBXL20   | 12.8075301 | 13.74511 |
| FBXL21   | 0          | 0        |
| FBXL22   | 0          | 0.016117 |
| FBXL3    | 28.6854473 | 27.91644 |
| FBXL4    | 3.29348901 | 3.586637 |
| FBXL5    | 47.9801078 | 41.97593 |
| FBXL6    | 6.00035233 | 5.611974 |
| FBXL7    | 0.00921759 | 0.010471 |
| FBXL8    | 0.788943   | 0.672189 |
| FBXO10   | 0.04595701 | 0.057429 |
| FBXO11   | 23.6191536 | 21.91717 |
| FBXO15   | 0          | 0        |
| FBXO16   | 0.01627348 | 0        |
| FBXO17   | 0          | 0.010251 |
| FBXO18   | 12.7879185 | 10.81685 |
| FBXO2    | 0.05475347 | 0.093301 |
| FBXO21   | 2.40899729 | 2.228825 |
| FBXO22   | 3.82738583 | 4.118122 |
| FBXO22OS | 0          | 0        |
| FBXO24   | 0.10260809 | 0.063581 |
| FBXO25   | 2.96179928 | 2.807136 |
| FBXO27   | 0.03618818 | 0.010278 |
| FBXO28   | 9.12165212 | 8.696652 |
| FBXO3    | 5.89762414 | 7.10144  |
| FBXO30   | 4.98445346 | 4.481167 |
| FBXO31   | 0.59889632 | 0.67375  |
| FBXO32   | 0.25210229 | 0.272073 |
| FBXO33   | 17.9936192 | 17.92159 |
| FBXO34   | 7.48815349 | 7.569599 |
| FBXO36   | 0.09709744 | 0.076364 |
| FBXO38   | 10.8537986 | 9.895727 |
| FBXO39   | 0.02522535 | 0.028656 |
| FBXO4    | 0.8737561  | 0.647803 |
| FBXO40   | 0.33437699 | 0.417426 |
| FBXO41   | 0.06495679 | 0.050313 |
| FBXO42   | 12.9783377 | 14.31822 |
| FBXO43   | 0.0064594  | 0.007338 |
| FBXO44   | 0.28614003 | 0.291199 |
| FBXO45   | 2.45717281 | 2.095624 |
| FBXO46   | 13.008984  | 11.87865 |
| FBXO47   | 0          | 0        |
| FBXO48   | 1.48468685 | 1.01022  |
| FBXO5    | 0.7591296  | 0.736417 |
| FBXO6    | 2.34518521 | 1.786378 |
| FBXO7    | 54.5114628 | 53.02185 |

|          |            |          |
|----------|------------|----------|
| FBXO8    | 4.43631203 | 3.977746 |
| FBXO9    | 13.4768025 | 12.52974 |
| FBXW10   | 0          | 0        |
| FBXW11   | 12.6705045 | 12.2258  |
| FBXW11P1 | 0          | 0        |
| FBXW12   | 0          | 0        |
| FBXW2    | 15.1086664 | 13.23224 |
| FBXW4    | 7.3949853  | 7.375013 |
| FBXW4P1  | 0          | 0        |
| FBXW5    | 41.3692439 | 45.86552 |
| FBXW7    | 4.38455617 | 4.067925 |
| FBXW8    | 1.03935725 | 1.038055 |
| FBXW9    | 0.08473075 | 0.096255 |
| FCAMR    | 0.01529671 | 0        |
| FCAR     | 0.29047593 | 0.155287 |
| FCER1A   | 0.46923485 | 0.348538 |
| FCER1G   | 18.4638693 | 19.31824 |
| FCER2    | 0.0650939  | 0.059158 |
| FCF1     | 7.97723225 | 7.029698 |
| FCGBP    | 0.01282815 | 0.013116 |
| FCGR1A   | 0.00966238 | 0        |
| FCGR1B   | 0.01873915 | 0        |
| FCGR1C   | 0          | 0        |
| FCGR2A   | 170.063679 | 119.573  |
| FCGR2B   | 10.699357  | 6.026127 |
| FCGR2C   | 66.9000537 | 52.94188 |
| FCGR3A   | 9.22209689 | 14.59149 |
| FCGR3B   | 2.32698652 | 2.300048 |
| FCGRT    | 73.3476036 | 75.64125 |
| FCHO1    | 21.2053195 | 31.48079 |
| FCHO2    | 11.501587  | 12.48473 |
| FCHSD1   | 12.7904097 | 12.01996 |
| FCHSD2   | 16.4316005 | 17.95373 |
| FCN1     | 0.24543188 | 0.297402 |
| FCN2     | 0          | 0        |
| FCN3     | 0.02037338 | 0        |
| FCRL1    | 0.04055812 | 0.05529  |
| FCRL2    | 0.04085762 | 0.037132 |
| FCRL3    | 0.16017973 | 0.166144 |
| FCRL4    | 0          | 0.006905 |
| FCRL5    | 0.01170241 | 0.004431 |
| FCRL6    | 0.02164213 | 0.012293 |
| FCRLA    | 0.01793205 | 0.040742 |
| FCRLB    | 0.45190191 | 0.445819 |
| FDFT1    | 20.0868784 | 17.36377 |
| FDPS     | 32.3613928 | 28.94637 |
| FDPSL1   | 0          | 0        |

|         |            |          |
|---------|------------|----------|
| FDPSL2  | 0          | 0        |
| FDPSL2A | 0          | 0        |
| FDPSL2B | 0          | 0        |
| FDPSL3  | 0          | 0        |
| FDPSL4  | 0          | 0        |
| FDPSL5  | 0          | 0        |
| FDPSP   | 0          | 0        |
| FDX1    | 1.35857994 | 1.424648 |
| FDX1L   | 0.57432614 | 0.652444 |
| FDXACB1 | 0.56058322 | 0.589659 |
| FDXP1   | 0          | 0        |
| FDXP2   | 0          | 0        |
| FDXR    | 0.28756371 | 0.150774 |
| FECH    | 2.03377755 | 1.680293 |
| FECHP   | 0          | 0        |
| FEM1A   | 10.1352597 | 9.022159 |
| FEM1B   | 8.86531149 | 7.728359 |
| FEM1C   | 11.3897759 | 12.71708 |
| FEN1    | 4.38456213 | 4.099445 |
| FER     | 0.57017847 | 0.469606 |
| FER1L4  | 0          | 0        |
| FER1L5  | 0.0128812  | 0.014633 |
| FER1L6  | 0.00356785 | 0        |
| FERD3L  | 0          | 0        |
| FERMT1  | 0.0040818  | 0.009274 |
| FERMT2  | 0          | 0.006941 |
| FERMT3  | 147.572777 | 167.3923 |
| FERP    | 0          | 0        |
| FES     | 122.120757 | 107.9852 |
| FETUB   | 0          | 0        |
| FEV     | 0          | 0        |
| FEZ1    | 0          | 0        |
| FEZ2    | 6.44308471 | 5.43828  |
| FEZF1   | 0          | 0        |
| FEZF2   | 0          | 0.034351 |
| FFAR1   | 0.09313546 | 0.132254 |
| FFAR2   | 56.0887228 | 41.1074  |
| FFAR3   | 7.24708242 | 10.21609 |
| FGA     | 0          | 0        |
| FGB     | 0          | 0        |
| FGD1    | 0.75248553 | 0.8269   |
| FGD2    | 3.41791094 | 3.019956 |
| FGD3    | 111.343763 | 103.9675 |
| FGD4    | 31.0221851 | 22.41659 |
| FGD5    | 0.01426171 | 0.028353 |
| FGD6    | 0.22863463 | 0.187727 |
| FGF1    | 0          | 0        |

|          |            |          |
|----------|------------|----------|
| FGF10    | 0          | 0        |
| FGF11    | 1.8818252  | 2.744808 |
| FGF12    | 0          | 0        |
| FGF13    | 0.00609077 | 0.020758 |
| FGF14    | 0          | 0.007899 |
| FGF16    | 0          | 0        |
| FGF17    | 0.13753283 | 0.09765  |
| FGF18    | 0          | 0.015632 |
| FGF19    | 0.00983871 | 0        |
| FGF2     | 0          | 0        |
| FGF20    | 0          | 0        |
| FGF21    | 0          | 0        |
| FGF22    | 0.0819701  | 0        |
| FGF23    | 0.00696664 | 0        |
| FGF3     | 0.01358226 | 0        |
| FGF4     | 0.01723388 | 0.019578 |
| FGF5     | 0          | 0        |
| FGF6     | 0.02825985 | 0        |
| FGF7     | 0.0053418  | 0        |
| FGF7P1   | 0          | 0        |
| FGF7P2   | 0          | 0        |
| FGF8     | 0.03808937 | 0        |
| FGF9     | 0.00464135 | 0.021091 |
| FGFBP1   | 0.01778793 | 0        |
| FGFBP2   | 0.61047075 | 0.571121 |
| FGFBP3   | 0          | 0        |
| FGFR1    | 0.0177754  | 0.033655 |
| FGFR1OP  | 8.91206336 | 6.779063 |
| FGFR1OP2 | 23.3381174 | 23.12702 |
| FGFR2    | 24.4120121 | 28.62786 |
| FGFR3    | 0.25509034 | 0.835923 |
| FGFR4    | 0.08024935 | 0.113956 |
| FGFRL1   | 0.24032661 | 0.236121 |
| FGG      | 0          | 0.012051 |
| FGGY     | 0.70554802 | 0.503809 |
| FGL1     | 0          | 0        |
| FGL2     | 0.90150786 | 0.145504 |
| FGR      | 119.398716 | 163.0714 |
| FH       | 3.27713259 | 2.094951 |
| FHAD1    | 0.0619607  | 0.089159 |
| FHDC1    | 0.03569115 | 0.051604 |
| FHIT     | 0.17360365 | 0.087652 |
| FHL1     | 0.13267983 | 0.100484 |
| FHL2     | 0.08406396 | 0.031833 |
| FHL3     | 303.398981 | 382.7785 |
| FHL5     | 0          | 0        |
| FHOD1    | 74.968889  | 114.5481 |



|         |            |          |
|---------|------------|----------|
| FHOD3   | 0.0723251  | 0.096662 |
| FIBCD1  | 0.00632721 | 0        |
| FIBIN   | 0          | 0        |
| FIBP    | 9.77315384 | 10.98715 |
| FICD    | 1.48998408 | 1.244167 |
| FIG4    | 3.73783662 | 3.030832 |
| FIGF    | 0          | 0        |
| FIGLA   | 0.11648383 | 0.033082 |
| FIGN    | 0.00463624 | 0.015801 |
| FIGNL1  | 0.53575305 | 0.486899 |
| FIGNL2  | 0.31076487 | 0.226574 |
| FILIP1  | 0          | 0        |
| FILIP1L | 0          | 0        |
| FIP1L1  | 20.2553893 | 19.56945 |
| FIS1    | 30.3857286 | 27.56969 |
| FITM1   | 0.14673711 | 0.595342 |
| FITM2   | 0.15362977 | 0.099729 |
| FIZ1    | 0.90108561 | 0.799163 |
| FJX1    | 0          | 0        |
| FKBP10  | 0.00729287 | 0        |
| FKBP11  | 5.2524013  | 6.64567  |
| FKBP14  | 0.692423   | 0.552748 |
| FKBP15  | 4.12651214 | 3.734803 |
| FKBP1A  | 93.2840738 | 110.8283 |
| FKBP1B  | 0.97007545 | 0.886408 |
| FKBP1C  | 0          | 0        |
| FKBP1P1 | 0          | 0        |
| FKBP1P2 | 0          | 0        |
| FKBP1P3 | 0          | 0        |
| FKBP1P4 | 0          | 0        |
| FKBP2   | 14.0768526 | 16.01707 |
| FKBP3   | 6.55578248 | 4.645804 |
| FKBP4   | 1.75257902 | 1.531506 |
| FKBP5   | 0.90210302 | 0.892208 |
| FKBP6   | 0.7723591  | 1.114174 |
| FKBP7   | 0.01448026 | 0        |
| FKBP8   | 94.054425  | 96.63596 |
| FKBP9   | 0.29655763 | 0.350645 |
| FKBP9L  | 0          | 0        |
| FKBPL   | 2.22142634 | 1.670536 |
| FKRP    | 4.95674901 | 4.008353 |
| FKSG2   | 0          | 0        |
| FKSG29  | 0          | 0        |
| FKSG43  | 0          | 0        |
| FKSG74  | 0          | 0        |
| FKSG83  | 0          | 0        |
| FKTN    | 0.10433708 | 0.108918 |

|          |            |          |
|----------|------------|----------|
| FLAD1    | 9.16980675 | 8.281334 |
| FLCN     | 11.4179012 | 8.822109 |
| FLG      | 0          | 0        |
| FLG2     | 0          | 0.002618 |
| FLI1     | 28.8140562 | 22.24635 |
| FLII     | 81.1467674 | 83.93926 |
| FLJ10038 | 0          | 0        |
| FLJ10088 | 0          | 0        |
| FLJ10213 | 0          | 0        |
| FLJ10357 | 24.7927867 | 35.24563 |
| FLJ10404 | 34.0085815 | 34.62326 |
| FLJ10489 | 0          | 0        |
| FLJ10661 | 0          | 0        |
| FLJ11235 | 0          | 0        |
| FLJ11506 | 7.86048916 | 6.755978 |
| FLJ12825 | 0          | 0        |
| FLJ12993 | 0          | 0        |
| FLJ13197 | 0          | 0        |
| FLJ13224 | 0          | 0        |
| FLJ14100 | 0          | 0        |
| FLJ14186 | 0          | 0        |
| FLJ14213 | 53.6226189 | 84.7344  |
| FLJ16126 | 0          | 0        |
| FLJ16686 | 0.00763447 | 0.017346 |
| FLJ16779 | 0          | 0        |
| FLJ20021 | 1.40910507 | 1.642891 |
| FLJ20184 | 0          | 0        |
| FLJ20444 | 0          | 0        |
| FLJ20464 | 0          | 0        |
| FLJ20674 | 0.29838067 | 0.214837 |
| FLJ20712 | 0          | 0        |
| FLJ21511 | 0          | 0.009666 |
| FLJ22167 | 0.06082545 | 0.061421 |
| FLJ22184 | 0.02282055 | 0.008642 |
| FLJ22536 | 0          | 0        |
| FLJ23152 | 0          | 0        |
| FLJ23172 | 0          | 0.012698 |
| FLJ23569 | 0          | 0        |
| FLJ23584 | 2.23565831 | 1.603543 |
| FLJ23834 | 0          | 0        |
| FLJ23865 | 0          | 0        |
| FLJ23867 | 0          | 0        |
| FLJ25006 | 5.38471491 | 4.950368 |
| FLJ25076 | 0.24167047 | 0.45359  |
| FLJ25328 | 0          | 0        |
| FLJ25363 | 0          | 0.015998 |
| FLJ25758 | 0          | 0        |

|          |            |          |
|----------|------------|----------|
| FLJ25996 | 0          | 0        |
| FLJ26850 | 0          | 0        |
| FLJ27243 | 0          | 0        |
| FLJ30058 | 0          | 0        |
| FLJ30064 | 0          | 0        |
| FLJ30375 | 0          | 0        |
| FLJ30403 | 0          | 0        |
| FLJ30679 | 0          | 0        |
| FLJ31945 | 0.03274974 | 0.024803 |
| FLJ32063 | 0          | 0        |
| FLJ32065 | 0          | 0        |
| FLJ32255 | 0          | 0        |
| FLJ32682 | 0.01736913 | 0        |
| FLJ32810 | 0.00884905 | 0.010053 |
| FLJ33360 | 0          | 0.009874 |
| FLJ33544 | 0.00978833 | 0        |
| FLJ33630 | 0          | 0        |
| FLJ33996 | 0          | 0        |
| FLJ34048 | 0          | 0        |
| FLJ34208 | 0.40589442 | 0.438047 |
| FLJ34503 | 0          | 0        |
| FLJ35024 | 0          | 0        |
| FLJ35220 | 0.76931051 | 0.73819  |
| FLJ35379 | 0          | 0        |
| FLJ35390 | 0          | 0        |
| FLJ35409 | 0          | 0        |
| FLJ35424 | 0          | 0        |
| FLJ35776 | 0          | 0        |
| FLJ35816 | 0          | 0        |
| FLJ35848 | 0.0404139  | 0.005739 |
| FLJ36000 | 0          | 0        |
| FLJ36031 | 10.0608317 | 7.508704 |
| FLJ36070 | 0.01082107 | 0.012293 |
| FLJ36208 | 3.08590963 | 3.143393 |
| FLJ36848 | 0          | 0        |
| FLJ37078 | 0          | 0.013214 |
| FLJ37201 | 0          | 0        |
| FLJ37307 | 0          | 0        |
| FLJ37396 | 0.00608372 | 0.027645 |
| FLJ37453 | 0          | 0        |
| FLJ37512 | 0.07200456 | 0        |
| FLJ37543 | 0.00707924 | 0.008042 |
| FLJ37786 | 0          | 0        |
| FLJ38379 | 0          | 0        |
| FLJ38576 | 0          | 0        |
| FLJ38717 | 0          | 0        |
| FLJ38723 | 0          | 0        |

|          |            |          |
|----------|------------|----------|
| FLJ39051 | 0.0376798  | 0        |
| FLJ39061 | 0          | 0        |
| FLJ39303 | 0          | 0        |
| FLJ39582 | 0          | 0        |
| FLJ39609 | 0          | 0        |
| FLJ39632 | 0          | 0        |
| FLJ39639 | 6.51227065 | 5.44765  |
| FLJ39653 | 0          | 0        |
| FLJ40113 | 0          | 0        |
| FLJ40125 | 0.22028868 | 0.222446 |
| FLJ40194 | 0          | 0        |
| FLJ40235 | 0          | 0.014001 |
| FLJ40292 | 0          | 0        |
| FLJ40330 | 0          | 0        |
| FLJ40434 | 0          | 0        |
| FLJ40448 | 0          | 0        |
| FLJ40504 | 0          | 0.024803 |
| FLJ40606 | 0          | 0        |
| FLJ40852 | 0          | 0        |
| FLJ41200 | 0.00876055 | 0        |
| FLJ41350 | 0          | 0        |
| FLJ41423 | 0          | 0        |
| FLJ41562 | 0          | 0        |
| FLJ41603 | 0.01296526 | 0.009819 |
| FLJ41733 | 0          | 0        |
| FLJ41856 | 0          | 0.007919 |
| FLJ41941 | 0          | 0        |
| FLJ42280 | 0          | 0        |
| FLJ42289 | 0          | 0        |
| FLJ42393 | 0          | 0        |
| FLJ42418 | 0          | 0        |
| FLJ42627 | 0          | 0        |
| FLJ42709 | 0          | 0        |
| FLJ42842 | 0          | 0        |
| FLJ42875 | 0          | 0        |
| FLJ42953 | 0          | 0        |
| FLJ43080 | 0          | 0        |
| FLJ43276 | 0          | 0        |
| FLJ43390 | 0          | 0        |
| FLJ43663 | 0          | 0        |
| FLJ43681 | 0          | 0        |
| FLJ43763 | 0          | 0        |
| FLJ43826 | 0          | 0        |
| FLJ43859 | 0          | 0.004852 |
| FLJ43860 | 0.01513703 | 0.005732 |
| FLJ43879 | 0          | 0        |
| FLJ43950 | 0          | 0        |

|          |            |          |
|----------|------------|----------|
| FLJ43980 | 0          | 0        |
| FLJ44048 | 0          | 0        |
| FLJ44054 | 0          | 0        |
| FLJ44082 | 0.00426737 | 0        |
| FLJ44313 | 0          | 0        |
| FLJ44342 | 0          | 0        |
| FLJ44385 | 0          | 0        |
| FLJ44477 | 0          | 0        |
| FLJ44606 | 0.81348007 | 0.781953 |
| FLJ44635 | 7.59248062 | 5.613211 |
| FLJ44790 | 0          | 0        |
| FLJ44817 | 0.04144964 | 0.082403 |
| FLJ44881 | 0          | 0        |
| FLJ45079 | 0.74608913 | 0.913945 |
| FLJ45139 | 0          | 0        |
| FLJ45244 | 0          | 0        |
| FLJ45248 | 0          | 0        |
| FLJ45256 | 0          | 0        |
| FLJ45340 | 0          | 0        |
| FLJ45422 | 10.533292  | 10.2945  |
| FLJ45445 | 0          | 0        |
| FLJ45455 | 0.00942417 | 0        |
| FLJ45513 | 0          | 0        |
| FLJ45831 | 0          | 0        |
| FLJ45872 | 0          | 0        |
| FLJ45964 | 0          | 0        |
| FLJ45974 | 0          | 0        |
| FLJ45983 | 0          | 0        |
| FLJ45994 | 0          | 0        |
| FLJ46010 | 0          | 0        |
| FLJ46020 | 0          | 0        |
| FLJ46111 | 0          | 0        |
| FLJ46210 | 0          | 0.008558 |
| FLJ46300 | 0          | 0        |
| FLJ46321 | 0          | 0        |
| FLJ46358 | 0          | 0        |
| FLJ46361 | 0          | 0        |
| FLJ46552 | 0.00605045 | 0.02062  |
| FLJ46836 | 0          | 0        |
| FLJ46838 | 0          | 0        |
| FLJ46906 | 0.17251554 | 0.367463 |
| FLJ90680 | 0          | 0        |
| FLJ90757 | 0          | 0        |
| FLNA     | 181.124208 | 191.3924 |
| FLNB     | 5.17912358 | 4.578631 |
| FLNC     | 0.01610608 | 0.023524 |
| FLOT1    | 121.93543  | 182.4535 |

|         |            |          |
|---------|------------|----------|
| FLOT2   | 96.307519  | 122.5019 |
| FLRT1   | 0          | 0        |
| FLRT2   | 0          | 0        |
| FLRT3   | 0          | 0        |
| FLT1    | 0.00806031 | 0.013735 |
| FLT3    | 0.38307474 | 0.484914 |
| FLT3LG  | 11.5882857 | 14.01752 |
| FLT4    | 0.01316346 | 0.011215 |
| FLVCR1  | 19.2053009 | 11.55619 |
| FLVCR2  | 0.04027841 | 0.05883  |
| FLYWCH1 | 2.41560555 | 2.54107  |
| FLYWCH2 | 1.55591544 | 1.907088 |
| FMN1    | 0          | 0.02543  |
| FMN2    | 0.00654078 | 0.026006 |
| FMNL1   | 421.663198 | 509.2115 |
| FMNL2   | 0.06788448 | 0.064265 |
| FMNL3   | 20.9915161 | 31.93502 |
| FMO1    | 0          | 0        |
| FMO10P  | 0          | 0        |
| FMO2    | 0          | 0        |
| FMO3    | 0.01016207 | 0        |
| FMO4    | 0.16710174 | 0.078165 |
| FMO5    | 0.56896742 | 0.616293 |
| FMO6P   | 0          | 0        |
| FMO8P   | 0          | 0        |
| FMO9P   | 0          | 0        |
| FMOD    | 0.0070413  | 0.007999 |
| FMR1    | 17.8635909 | 21.01496 |
| FMR1NB  | 0          | 0        |
| FN1     | 0.00468427 | 0.005321 |
| FN3K    | 0.05868899 | 0.100007 |
| FN3KRP  | 6.12567145 | 6.239429 |
| FNBP1   | 91.1007243 | 82.34089 |
| FNBP1L  | 4.78440194 | 3.979311 |
| FNBP4   | 31.9010311 | 26.7023  |
| FNDC1   | 0.00320948 | 0.010938 |
| FNDC3A  | 11.5540455 | 10.64722 |
| FNDC3B  | 37.5880458 | 37.69169 |
| FNDC4   | 0.02516497 | 0.085763 |
| FNDC5   | 0.11078458 | 0.080906 |
| FNDC7   | 0.01372411 | 0.046772 |
| FNDC8   | 0.01551685 | 0.035255 |
| FNIP1   | 15.1220894 | 14.92548 |
| FNIP2   | 0.82430918 | 0.936428 |
| FNTA    | 18.2947685 | 17.34279 |
| FNTAL1  | 0          | 0        |
| FNTAL2  | 0          | 0        |

|         |            |          |
|---------|------------|----------|
| FNTB    | 0.73838516 | 0.550739 |
| FOLH1   | 0          | 0        |
| FOLH1B  | 0          | 0        |
| FOLH2   | 0          | 0        |
| FOLR1   | 0          | 0        |
| FOLR1P  | 0          | 0        |
| FOLR2   | 0.01859004 | 0        |
| FOLR3   | 0.32346663 | 0.113066 |
| FOLR4   | 0.02872313 | 0        |
| FOS     | 141.729294 | 198.3243 |
| FOSB    | 3.21282202 | 4.206461 |
| FOSL1   | 0.06302557 | 0.257753 |
| FOSL2   | 102.197543 | 103.7754 |
| FOXA1   | 0.01351242 | 0.007675 |
| FOXA2   | 0          | 0        |
| FOXA3   | 0          | 0        |
| FOXB1   | 0          | 0        |
| FOXB2   | 0.04855735 | 0        |
| FOXC1   | 0.05481691 | 0.062273 |
| FOXC2   | 0          | 0.014192 |
| FOXD1   | 0.00926226 | 0.010522 |
| FOXD2   | 0.2968282  | 0.219692 |
| FOXD3   | 0.02033398 | 0        |
| FOXD4   | 0.01925397 | 0.032809 |
| FOXD4L1 | 0.02034381 | 0.034666 |
| FOXD4L2 | 0.01352546 | 0.007683 |
| FOXD4L3 | 0.02843823 | 0        |
| FOXD4L4 | 0          | 0        |
| FOXD4L5 | 0.02705092 | 0.015365 |
| FOXD4L6 | 0          | 0.01753  |
| FOXE1   | 0.05467437 | 0.048309 |
| FOXE3   | 0          | 0.012057 |
| FOXF1   | 0.00820661 | 0.009323 |
| FOXF2   | 0.00961378 | 0.010921 |
| FOXG1   | 0.02440077 | 0        |
| FOXH1   | 0          | 0.054707 |
| FOXI1   | 0.32966547 | 0.332894 |
| FOXI2   | 0.0198477  | 0.030063 |
| FOXI3   | 0.19992391 | 0.151411 |
| FOXJ1   | 0.00884905 | 0.010053 |
| FOXJ2   | 16.246498  | 13.91192 |
| FOXJ3   | 17.5686717 | 16.03147 |
| FOXK1   | 4.77395818 | 5.414755 |
| FOXK2   | 7.380043   | 10.25398 |
| FOXL1   | 0          | 0.014975 |
| FOXL2   | 0.03073879 | 0.00873  |
| FOXM1   | 0.26093213 | 0.250313 |

|         |            |          |
|---------|------------|----------|
| FOXN1   | 0          | 0        |
| FOXN2   | 22.6725654 | 16.741   |
| FOXN3   | 92.5665399 | 87.8985  |
| FOXN4   | 0.00627247 | 0.007126 |
| FOXO1   | 3.7778174  | 4.008602 |
| FOXO1B  | 0          | 0        |
| FOXO3   | 18.385304  | 14.71658 |
| FOXO3B  | 0          | 0        |
| FOXO4   | 28.0654297 | 22.20215 |
| FOXO6   | 0.05682522 | 0.048416 |
| FOXP1   | 5.09804405 | 5.228711 |
| FOXP2   | 0.00558293 | 0.012685 |
| FOXP3   | 0.09709431 | 0.090246 |
| FOXP4   | 1.92970763 | 2.224298 |
| FOXQ1   | 0          | 0        |
| FOXR1   | 0          | 0.020716 |
| FOXR2   | 0          | 0        |
| FOXRED1 | 3.7179596  | 3.354444 |
| FOXRED2 | 0.0373378  | 0.03299  |
| FOXS1   | 0          | 0        |
| FPGS    | 20.6384586 | 27.26652 |
| FPGT    | 0.09205486 | 0.055774 |
| FPR1    | 228.628523 | 211.3025 |
| FPR2    | 1.99750941 | 1.286661 |
| FPR3    | 0.15871327 | 0.18979  |
| FRAG1   | 3.00640758 | 3.393149 |
| FRAP1   | 5.65575378 | 5.075415 |
| FRAS1   | 0.00134597 | 0.007645 |
| FRAT1   | 45.6989653 | 51.43723 |
| FRAT2   | 77.407545  | 85.00066 |
| FRDAP   | 0          | 0        |
| FREM1   | 0.00285128 | 0        |
| FREM2   | 0.00130083 | 0.005911 |
| FREM3   | 0.00624917 | 0.007099 |
| FREQ    | 0.0461634  | 0.05721  |
| FRG1    | 24.7748147 | 23.5416  |
| FRG1B   | 0          | 0        |
| FRG2    | 0          | 0        |
| FRG2B   | 0          | 0        |
| FRK     | 0.0073799  | 0        |
| FRMD1   | 0          | 0        |
| FRMD3   | 0.19952864 | 0.094445 |
| FRMD4A  | 0.96721467 | 0.870592 |
| FRMD4B  | 5.96270553 | 3.504905 |
| FRMD5   | 0          | 0.021297 |
| FRMD6   | 0.15845177 | 0.180004 |
| FRMD7   | 0.01313262 | 0        |



|          |            |          |
|----------|------------|----------|
| FRMD8    | 24.6733828 | 25.70578 |
| FRMPD1   | 0.00427692 | 0.009717 |
| FRMPD2   | 0.00415931 | 0        |
| FRMPD2L1 | 0          | 0        |
| FRMPD2L2 | 0          | 0        |
| FRMPD3   | 0.00287664 | 0.003268 |
| FRMPD4   | 0          | 0.00376  |
| FRRS1    | 7.92964312 | 5.039241 |
| FRS2     | 2.79022082 | 2.41093  |
| FRS3     | 1.39780594 | 1.168893 |
| FRY      | 57.3551881 | 45.25623 |
| FRYL     | 5.92538586 | 5.260192 |
| FRZB     | 0          | 0.023474 |
| FSCB     | 0          | 0        |
| FSCN1    | 0.81012258 | 0.627876 |
| FSCN2    | 0.03620895 | 0.027423 |
| FSCN3    | 0.07816108 | 0.038054 |
| FSD1     | 0          | 0.013711 |
| FSD1L    | 0.19489382 | 0.158145 |
| FSD2     | 0.02530124 | 0.009581 |
| FSHB     | 0          | 0        |
| FSHR     | 0          | 0        |
| FSIP1    | 0.17190992 | 0.195292 |
| FST      | 0          | 0        |
| FSTL1    | 0          | 0        |
| FSTL3    | 0.05861303 | 0.076098 |
| FSTL4    | 0.05078582 | 0.008876 |
| FSTL5    | 0.00435307 | 0        |
| FTCD     | 0.06971924 | 0.056573 |
| FTH1     | 6046.38222 | 5499.192 |
| FTHL1    | 0          | 0        |
| FTHL10   | 0          | 0        |
| FTHL11   | 0          | 0        |
| FTHL12   | 0          | 0        |
| FTHL13   | 0          | 0        |
| FTHL15   | 0          | 0        |
| FTHL16   | 0          | 0        |
| FTHL17   | 0          | 0.029379 |
| FTHL18   | 0          | 0        |
| FTHL19   | 0          | 0        |
| FTHL2    | 0          | 0        |
| FTHL3P   | 0          | 0        |
| FTHL4    | 0          | 0        |
| FTHL7    | 0          | 0        |
| FTHL8    | 0          | 0        |
| FTHP1    | 0          | 0        |
| FTHP2    | 0          | 0        |

|          |            |          |
|----------|------------|----------|
| FTL      | 3809.18166 | 3616.798 |
| FTLL1    | 0          | 0        |
| FTLP     | 0          | 0        |
| FTMT     | 0.14351762 | 0.081519 |
| FTO      | 0.91563505 | 1.040176 |
| FTSJ1    | 7.33893419 | 7.094702 |
| FTSJ2    | 6.6319751  | 4.774038 |
| FTSJ3    | 12.1165928 | 10.12047 |
| FTSJD1   | 5.08572919 | 5.681272 |
| FTSJD2   | 16.8039503 | 14.95426 |
| FUBP1    | 19.5672636 | 17.73991 |
| FUBP3    | 5.76748071 | 5.560835 |
| FUCA1    | 77.3518294 | 55.96497 |
| FUCA1P   | 0          | 0        |
| FUCA2    | 5.65218621 | 4.679113 |
| FUK      | 2.41627172 | 1.779004 |
| FUNDC1   | 2.78540709 | 1.939389 |
| FUNDC2   | 6.4267712  | 6.938286 |
| FUNDC2P  | 0          | 0        |
| FURIN    | 215.937191 | 254.1307 |
| FUS      | 126.896524 | 113.3619 |
| FUSIP1   | 16.2584543 | 16.27418 |
| FUSIP1P2 | 0          | 0        |
| FUSSEL18 | 0.01677999 | 0.025416 |
| FUT1     | 0.01485539 | 0.005625 |
| FUT10    | 0.08294016 | 0.148062 |
| FUT11    | 8.99916889 | 8.178559 |
| FUT2     | 0.02035366 | 0.023122 |
| FUT3     | 0.02435367 | 0        |
| FUT4     | 3.04881205 | 2.598611 |
| FUT5     | 0          | 0.012015 |
| FUT6     | 0          | 0        |
| FUT7     | 0.05225849 | 0.098944 |
| FUT8     | 0.40480797 | 0.314056 |
| FUT9     | 0          | 0        |
| FUZ      | 9.00159142 | 6.881151 |
| FXC1     | 7.25011412 | 6.15197  |
| FXN      | 0.13893391 | 0.220964 |
| FXR1     | 15.4538216 | 14.38342 |
| FXR2     | 20.167456  | 20.54976 |
| FXYD1    | 0          | 0        |
| FXYD2    | 0.0074242  | 0        |
| FXYD3    | 0          | 0        |
| FXYD4    | 0.02727021 | 0        |
| FXYD5    | 10.2741807 | 14.93735 |
| FXYD6    | 0.01255244 | 0        |
| FXYD7    | 0          | 0.100498 |

|           |            |          |
|-----------|------------|----------|
| FXD8      | 0          | 0        |
| FYB       | 82.8471202 | 53.08352 |
| FYCO1     | 2.48447473 | 2.019211 |
| FYN       | 0.62729138 | 0.620392 |
| FYTTD1    | 12.7164295 | 15.04691 |
| FZD1      | 0.04833409 | 0.027454 |
| FZD10     | 0          | 0.00734  |
| FZD2      | 0.03180837 | 0.02409  |
| FZD3      | 0.03742113 | 0.030365 |
| FZD4      | 0          | 0.003235 |
| FZD5      | 0.1153126  | 0.072776 |
| FZD6      | 0.26883748 | 0.279953 |
| FZD7      | 0.6442454  | 0.42796  |
| FZD8      | 0.02639715 | 0.014994 |
| FZD9      | 0.10773013 | 0.203972 |
| FZR1      | 22.1218507 | 21.2356  |
| G0S2      | 3.29680683 | 2.951535 |
| G2E3      | 4.33993572 | 4.322516 |
| G3BP1     | 12.0293075 | 10.16065 |
| G3BP2     | 43.718459  | 41.07861 |
| G6PC      | 0          | 0.007715 |
| G6PC2     | 0.00682419 | 0        |
| G6PC3     | 1.2685373  | 1.042482 |
| G6PD      | 144.460844 | 126.8204 |
| GAA       | 19.9503935 | 23.43588 |
| GAB1      | 0.83995001 | 0.703569 |
| GAB2      | 4.33338659 | 3.819747 |
| GAB3      | 31.0789959 | 35.72439 |
| GAB4      | 0          | 0        |
| GABARAP   | 248.607469 | 235.1065 |
| GABARAPL1 | 201.809447 | 230.4211 |
| GABARAPL2 | 55.2701814 | 59.40289 |
| GABARAPL3 | 0          | 0        |
| GABBR1    | 0.02875119 | 0.04666  |
| GABBR2    | 0.00383394 | 0.004355 |
| GABPA     | 8.06106318 | 8.216847 |
| GABPAP    | 0          | 0        |
| GABPB1    | 5.60417829 | 4.588224 |
| GABPB2    | 1.21651941 | 1.149616 |
| GABRA1    | 0          | 0        |
| GABRA2    | 0.00681755 | 0        |
| GABRA3    | 0.00754949 | 0.017153 |
| GABRA4    | 0.00188924 | 0.002146 |
| GABRA5    | 0          | 0        |
| GABRA6    | 0          | 0        |
| GABRB1    | 0          | 0.01073  |
| GABRB2    | 0.00851343 | 0.003224 |

|            |            |          |
|------------|------------|----------|
| GABRB3     | 0          | 0.004016 |
| GABRD      | 0.01092225 | 0.012408 |
| GABRE      | 0.00667047 | 0        |
| GABRG1     | 0          | 0        |
| GABRG2     | 0          | 0        |
| GABRG3     | 0.01253747 | 0.042728 |
| GABRP      | 0          | 0        |
| GABRQ      | 0          | 0        |
| GABRR1     | 0          | 0        |
| GABRR2     | 0.91526579 | 0.907956 |
| GABRR3     | 0          | 0        |
| GAD1       | 0.00572741 | 0.006506 |
| GAD2       | 0          | 0        |
| GADD45A    | 20.4356907 | 24.64309 |
| GADD45B    | 36.2505706 | 47.66508 |
| GADD45G    | 6.03541395 | 9.701925 |
| GADD45GIP1 | 1.9242564  | 1.575196 |
| GADL1      | 0          | 0.006535 |
| GAF A1     | 0.15235747 | 0.08654  |
| GAF A3     | 1.48255539 | 1.377987 |
| GAGE1      | 0.02206226 | 0        |
| GAGE10     | 0          | 0        |
| GAGE12B    | 0          | 0        |
| GAGE12C    | 0          | 0        |
| GAGE12D    | 0          | 0        |
| GAGE12E    | 0          | 0        |
| GAGE12F    | 0          | 0        |
| GAGE12G    | 0          | 0        |
| GAGE12H    | 0          | 0        |
| GAGE12I    | 0          | 0        |
| GAGE12J    | 0          | 0        |
| GAGE13     | 0          | 0        |
| GAGE2A     | 0          | 0        |
| GAGE2B     | 0          | 0        |
| GAGE2C     | 0          | 0        |
| GAGE2D     | 0          | 0        |
| GAGE2E     | 0          | 0        |
| GAGE8      | 0          | 0        |
| GAK        | 54.1712014 | 60.72753 |
| GAL        | 0          | 0        |
| GAL3ST1    | 0.01173944 | 0        |
| GAL3ST2    | 0.02902047 | 0.032968 |
| GAL3ST3    | 0.00633293 | 0        |
| GAL3ST4    | 0.69532591 | 0.648847 |
| GALC       | 114.968194 | 70.76632 |
| GALE       | 0.75817932 | 0.809883 |
| GALK1      | 1.62208652 | 2.632451 |

|                |            |          |
|----------------|------------|----------|
| GALK2          | 0.95142909 | 0.810629 |
| GALM           | 1.30402778 | 1.135096 |
| GALNAC4S-6ST   | 54.0009569 | 62.14722 |
| GALNS          | 18.5873535 | 23.97608 |
| GALNT1         | 55.3791221 | 59.65676 |
| GALNT10        | 16.5163845 | 15.8531  |
| GALNT11        | 3.46045124 | 3.588909 |
| GALNT12        | 4.61156106 | 3.183515 |
| GALNT13        | 0          | 0.004217 |
| GALNT14        | 0.01550541 | 0.008807 |
| GALNT2         | 5.63473211 | 5.961903 |
| GALNT3         | 19.5901768 | 24.56503 |
| GALNT4         | 0          | 0        |
| GALNT5         | 0.00671521 | 0        |
| GALNT6         | 45.1207324 | 37.79343 |
| GALNT7         | 15.9142278 | 19.27668 |
| GALNT8         | 0          | 0.011187 |
| GALNT9 (NC_00C | 0.01217448 | 0        |
| GALNT9 (NC_00C | 0          | 0        |
| GALNTL1        | 0          | 0.008216 |
| GALNTL2        | 0.01359103 | 0.010293 |
| GALNTL4        | 0          | 0        |
| GALNTL5        | 0          | 0        |
| GALNTL6        | 0.01475462 | 0        |
| GALP           | 0          | 0        |
| GALR1          | 0.00754407 | 0        |
| GALR2          | 0.08099126 | 0.12881  |
| GALR3          | 0.01817228 | 0.020644 |
| GALT           | 5.54375768 | 4.920154 |
| GAMT           | 0.69010933 | 0.487807 |
| GAMTP          | 0          | 0        |
| GAN            | 0.50897588 | 0.388974 |
| GANAB          | 36.9859314 | 33.88239 |
| GANC           | 1.48085083 | 1.385399 |
| GAP43          | 0.01998606 | 0        |
| GAPDH          | 489.472915 | 608.7603 |
| GAPDHL1        | 0          | 0        |
| GAPDHL10       | 0          | 0        |
| GAPDHL11       | 0          | 0        |
| GAPDHL12       | 0          | 0        |
| GAPDHL13       | 0          | 0        |
| GAPDHL14       | 0          | 0        |
| GAPDHL15       | 0          | 0        |
| GAPDHL16       | 0          | 0        |
| GAPDHL18       | 0          | 0        |
| GAPDHL19       | 0          | 0        |
| GAPDHL3        | 0          | 0        |

|          |            |          |
|----------|------------|----------|
| GAPDHL4  | 0          | 0        |
| GAPDHL5  | 0          | 0        |
| GAPDHL6  | 0          | 0        |
| GAPDHL7  | 0          | 0        |
| GAPDHL8  | 0          | 0        |
| GAPDHL9  | 0          | 0        |
| GAPDHP1  | 0          | 0        |
| GAPDHP14 | 0          | 0        |
| GAPDHP15 | 0          | 0        |
| GAPDHP16 | 0          | 0        |
| GAPDHP17 | 0          | 0        |
| GAPDHP19 | 0          | 0        |
| GAPDHP2  | 0          | 0        |
| GAPDHS   | 0.26774885 | 0.336185 |
| GAPT     | 607.618782 | 518.585  |
| GAPVD1   | 12.8001507 | 12.82841 |
| GAR1     | 2.02453858 | 1.960577 |
| GARNL1   | 3.22170954 | 3.532348 |
| GARNL2P  | 0          | 0        |
| GARNL3   | 0.09562082 | 0.063898 |
| GARNL4   | 24.1051333 | 25.86747 |
| GARS     | 11.3995522 | 11.03058 |
| GART     | 1.53403702 | 1.267902 |
| GAS1     | 0.0074347  | 0.008446 |
| GAS2     | 0.19053688 | 0.18822  |
| GAS2L1   | 0.04173073 | 0.023703 |
| GAS2L2   | 0          | 0.015886 |
| GAS2L3   | 0.01802429 | 0        |
| GAS5     | 0          | 0        |
| GAS6     | 0.0484827  | 0.036718 |
| GAS7     | 11.9599928 | 7.838815 |
| GAS8     | 0.6403319  | 0.749925 |
| GAST     | 0          | 0.054908 |
| GATA1    | 77.0407904 | 79.15977 |
| GATA2    | 0.39659896 | 0.412469 |
| GATA3    | 0.05478914 | 0.093362 |
| GATA4    | 0.01233881 | 0.007009 |
| GATA5    | 0          | 0        |
| GATA6    | 0.01203511 | 0        |
| GATAD1   | 10.951247  | 10.77397 |
| GATAD2A  | 15.6466717 | 20.12043 |
| GATAD2B  | 26.0778209 | 31.95967 |
| GATC     | 6.4457219  | 6.508838 |
| GATM     | 0.08130445 | 0.083127 |
| GATS     | 9.61336729 | 8.978385 |
| GATSL1   | 5.62799263 | 5.090665 |
| GATSL2   | 5.05457451 | 4.65639  |

|        |            |          |
|--------|------------|----------|
| GATSL3 | 11.2904212 | 17.30271 |
| GBA    | 10.3091945 | 8.656653 |
| GBA2   | 41.7071298 | 47.55855 |
| GBA3   | 0          | 0.011125 |
| GBAP   | 0          | 0        |
| GBAS   | 10.3742008 | 10.35747 |
| GBE1   | 8.22287871 | 7.260333 |
| GBF1   | 17.7871134 | 16.27304 |
| GBGT1  | 3.36577899 | 4.399566 |
| GBL    | 1.28203238 | 0.946666 |
| GBP1   | 0.06893551 | 0.031325 |
| GBP2   | 9.96576381 | 6.682308 |
| GBP3   | 0.36656005 | 0.337849 |
| GBP4   | 0.06500916 | 0.081625 |
| GBP5   | 0.07264428 | 0.058946 |
| GBP6   | 0.00431998 | 0.004908 |
| GBP7   | 0          | 0        |
| GBX1   | 0.01588016 | 0        |
| GBX2   | 0          | 0        |
| GC     | 0          | 0        |
| GCA    | 33.2911936 | 22.90039 |
| GCAT   | 0.21616173 | 0.212821 |
| GCATP  | 0          | 0        |
| GCC1   | 12.2936107 | 11.53214 |
| GCC2   | 24.0675912 | 25.45604 |
| GCDH   | 6.72764432 | 6.803717 |
| GCET2  | 0          | 0.013775 |
| GCG    | 0          | 0        |
| GCGR   | 0          | 0        |
| GCH1   | 2.25630688 | 2.261167 |
| GCHFR  | 11.4710431 | 11.08832 |
| GCK    | 0          | 0.015545 |
| GCKR   | 0          | 0.010911 |
| GCLC   | 5.70178467 | 4.472434 |
| GCLM   | 1.62785581 | 1.383067 |
| GCM1   | 2.22800071 | 1.943635 |
| GCM2   | 0          | 0.010099 |
| GCN1L1 | 6.3575672  | 5.505589 |
| GCNT1  | 4.97235465 | 3.729049 |
| GCNT1P | 0          | 0        |
| GCNT2  | 0.49806686 | 0.304165 |
| GCNT3  | 0          | 0        |
| GCNT4  | 0.04283391 | 0.013903 |
| GCNT6  | 0.01787868 | 0.040621 |
| GCNT7  | 0.26485398 | 0.243017 |
| GCOM1  | 1.43891055 | 1.136575 |
| GCSH   | 0.01810967 | 0.041146 |

|         |            |          |
|---------|------------|----------|
| GDA     | 0          | 0        |
| GDAP1   | 1.10006861 | 1.12105  |
| GDAP1L1 | 0          | 0        |
| GDAP2   | 5.50000379 | 5.10129  |
| GDE1    | 17.252655  | 16.99689 |
| GDEP    | 0          | 0        |
| GDF1    | 0.02465832 | 0.018675 |
| GDF10   | 0.00786288 | 0.008932 |
| GDF11   | 0.53303656 | 0.616752 |
| GDF15   | 0.17521109 | 0.258755 |
| GDF2    | 0.02172038 | 0.012337 |
| GDF3    | 0          | 0        |
| GDF5    | 0          | 0        |
| GDF5OS  | 0          | 0        |
| GDF6    | 0          | 0.006454 |
| GDF7    | 0.0105443  | 0        |
| GDF9    | 0.07286006 | 0.011824 |
| GDI1    | 59.8132954 | 57.7055  |
| GDI2    | 47.211108  | 51.53321 |
| GDI2P   | 0          | 0        |
| GDNF    | 0          | 0        |
| GDPD1   | 0.09236829 | 0.118048 |
| GDPD2   | 0.00970699 | 0        |
| GDPD3   | 19.3785382 | 18.49029 |
| GDPD4   | 0          | 0        |
| GDPD5   | 1.8547866  | 1.813583 |
| GEFT    | 0.02250303 | 0        |
| GEM     | 0.03828007 | 0.032615 |
| GEMIN4  | 1.85468036 | 1.877098 |
| GEMIN5  | 0.63418374 | 0.521548 |
| GEMIN6  | 1.2439229  | 1.10292  |
| GEMIN7  | 2.54737283 | 2.375553 |
| GEMIN8  | 0.75482164 | 0.945437 |
| GEMIN8P | 0          | 0        |
| GEN1    | 1.09626239 | 0.855031 |
| GFAP    | 0.02291589 | 0.013016 |
| GFER    | 1.28352311 | 1.398588 |
| GFI1    | 0.39016078 | 0.303694 |
| GFI1B   | 64.9543027 | 69.82827 |
| GFM1    | 2.38262834 | 2.286579 |
| GFM2    | 7.74411258 | 6.824317 |
| GFOD1   | 7.63344514 | 5.480651 |
| GFOD2   | 1.42880473 | 1.634993 |
| GFPT1   | 2.99284308 | 2.772453 |
| GFPT2   | 0.02094852 | 0        |
| GFRA1   | 0.00437982 | 0.004976 |
| GFRA2   | 0.31569566 | 0.215181 |



|         |            |          |
|---------|------------|----------|
| GFRA3   | 0          | 0.012369 |
| GFRA4   | 0          | 0        |
| GFRAL   | 0          | 0.012499 |
| GGA1    | 15.6271352 | 15.51607 |
| GGA2    | 115.525801 | 135.2875 |
| GGA3    | 26.2297291 | 25.3135  |
| GGCT    | 1.57013201 | 1.025112 |
| GGCX    | 3.40601296 | 3.266088 |
| GGH     | 0.4506434  | 0.41595  |
| GGN     | 0.3221151  | 0.188508 |
| GGNBP1  | 0.07031883 | 0        |
| GGNBP2  | 29.5564724 | 25.99009 |
| GGPS1   | 7.56261063 | 6.654398 |
| GGT1    | 1.74584592 | 1.660665 |
| GGT2    | 0.02220204 | 0.025222 |
| GGT3P   | 0          | 0        |
| GGT5    | 0.93464627 | 1.013945 |
| GGT6    | 0.01598884 | 0.009082 |
| GGT7    | 3.07415824 | 3.401819 |
| GGT8P   | 0          | 0        |
| GGTA1   | 0          | 0        |
| GGTA1P  | 0          | 0        |
| GGTLC1  | 0          | 0        |
| GGTLC2  | 0.02479402 | 0        |
| GGTLC3  | 0          | 0        |
| GGTLC4P | 0          | 0        |
| GGTLC5P | 0          | 0        |
| GH1     | 0          | 0        |
| GH2     | 0.01950402 | 0        |
| GHDC    | 6.52739072 | 5.540215 |
| GHITM   | 60.8953338 | 55.14349 |
| GHR     | 0.00964465 | 0        |
| GHRH    | 0.0463113  | 0        |
| GHRHR   | 0          | 0        |
| GHRL    | 1.12754141 | 0.979516 |
| GHRLOS  | 0          | 0        |
| GHSR    | 0.0178939  | 0        |
| GIF     | 0.01389645 | 0        |
| GIGYF1  | 31.9150505 | 30.9612  |
| GIGYF2  | 12.2245783 | 11.01038 |
| GIMAP1  | 0.13477776 | 0.15311  |
| GIMAP2  | 0.50996991 | 0.397258 |
| GIMAP3P | 0          | 0        |
| GIMAP4  | 0.08559931 | 0.097242 |
| GIMAP5  | 0.18076588 | 0.166849 |
| GIMAP6  | 0.20177861 | 0.163731 |
| GIMAP7  | 0.29083045 | 0.330388 |

|        |            |          |
|--------|------------|----------|
| GIMAP8 | 0.11197868 | 0.157498 |
| GIN1   | 0.81162872 | 0.558598 |
| GINS1  | 0.00639262 | 0.014524 |
| GINS2  | 0.05345423 | 0.080966 |
| GINS3  | 0.18466414 | 0.109885 |
| GINS4  | 0.13137411 | 0.136806 |
| GIP    | 0          | 0        |
| GIPC1  | 0.08719681 | 0.123821 |
| GIPC2  | 0          | 0.008461 |
| GIPC3  | 0.1022775  | 0.077459 |
| GIPR   | 42.8505386 | 51.08628 |
| GIT1   | 5.46323094 | 6.568405 |
| GIT2   | 34.1055002 | 32.46393 |
| GIYD1  | 18.8698564 | 22.68226 |
| GIYD2  | 19.2291021 | 20.08325 |
| GJA1   | 0          | 0        |
| GJA10  | 0          | 0        |
| GJA1P1 | 0          | 0        |
| GJA3   | 0.00807735 | 0.009176 |
| GJA4   | 0.11666337 | 0.854091 |
| GJA5   | 0          | 0.007271 |
| GJA6P  | 0          | 0        |
| GJA8   | 0.01530228 | 0.017384 |
| GJA9   | 0.01818014 | 0.010326 |
| GJB1   | 0.01213233 | 0        |
| GJB2   | 0.00900828 | 0        |
| GJB3   | 0.00893934 | 0.010155 |
| GJB4   | 0.01826701 | 0.020752 |
| GJB5   | 0.01641322 | 0.037291 |
| GJB6   | 0.00838331 | 0        |
| GJB7   | 0.00922164 | 0        |
| GJC1   | 0.0053787  | 0.003055 |
| GJC2   | 0.12185881 | 0.149082 |
| GJC3   | 0.02503016 | 0.028435 |
| GJD2   | 0          | 0        |
| GJD3   | 0          | 0        |
| GJD4   | 0          | 0.030234 |
| GK     | 23.2774402 | 21.60881 |
| GK2    | 0          | 0        |
| GK3P   | 0          | 0        |
| GK4P   | 0          | 0        |
| GK5    | 20.3184892 | 16.26163 |
| GK6P   | 0          | 0        |
| GK7P   | 0          | 0        |
| GKAP1  | 4.31058574 | 4.501572 |
| GKN1   | 0          | 0        |
| GKN2   | 0.02628166 | 0.029856 |

|          |            |          |
|----------|------------|----------|
| GLA      | 12.2029953 | 8.607398 |
| GLB1     | 14.855193  | 12.7056  |
| GLB1L    | 0.10072015 | 0.15256  |
| GLB1L2   | 0.01349075 | 0.022989 |
| GLB1L3   | 0.00714176 | 0        |
| GLCCI1   | 16.4480566 | 14.10958 |
| GLCE     | 0.14175317 | 0.232078 |
| GLDC     | 0.00551991 | 0.006271 |
| GLDCP    | 0          | 0        |
| GLDN     | 0.00413559 | 0.014094 |
| GLE1     | 11.3576198 | 10.10759 |
| GLG1     | 24.200539  | 22.03677 |
| GLI1     | 0.82795258 | 1.066418 |
| GLI2     | 0          | 0.003529 |
| GLI3     | 0.01023753 | 0.01163  |
| GLI4     | 3.63207504 | 3.041216 |
| GLIPR1   | 2.58309671 | 1.815684 |
| GLIPR1L1 | 0.06556756 | 0.049657 |
| GLIPR1L2 | 0          | 0        |
| GLIPR2   | 35.5521263 | 33.944   |
| GLIS1    | 0.01493276 | 0.008482 |
| GLIS2    | 0.26104325 | 0.406144 |
| GLIS3    | 0.00812102 | 0        |
| GLMN     | 1.72796765 | 1.375275 |
| GLO1     | 4.97130444 | 3.803882 |
| GLOD4    | 7.66846584 | 6.631141 |
| GLOD5    | 0.17742895 | 0.251953 |
| GLP-1    | 0.21237708 | 0.241264 |
| GLP1R    | 0          | 0.007648 |
| GLP2R    | 0.01265062 | 0.014371 |
| GLRA1    | 0.01230271 | 0        |
| GLRA2    | 0.0059833  | 0        |
| GLRA3    | 0          | 0        |
| GLRA4    | 0.01255244 | 0        |
| GLRB     | 0          | 0        |
| GLRX     | 60.1143191 | 74.91832 |
| GLRX2    | 3.41742996 | 3.161264 |
| GLRX3    | 7.41971085 | 6.278481 |
| GLRX5    | 8.51068051 | 7.954904 |
| GLRXL    | 0          | 0        |
| GLRXP    | 0          | 0        |
| GLRXP2   | 0          | 0        |
| GLS      | 7.01329043 | 6.409006 |
| GLS2     | 0.15229939 | 0.100166 |
| GLT1D1   | 0.35544477 | 0.509128 |
| GLT25D1  | 18.1345674 | 21.63155 |
| GLT25D2  | 3.13635292 | 4.235896 |

|         |            |          |
|---------|------------|----------|
| GLT6D1  | 0          | 0        |
| GLT8D1  | 7.0950746  | 5.993421 |
| GLT8D2  | 0.10081405 | 0.101801 |
| GLT8D3  | 11.4966925 | 11.82295 |
| GLT8D4  | 0          | 0        |
| GLTP    | 9.86120149 | 12.63194 |
| GLTPD1  | 6.30855804 | 5.837856 |
| GLTPD2  | 0.63713124 | 0.186785 |
| GLTPP1  | 0          | 0        |
| GLTSCR1 | 6.2683989  | 6.430126 |
| GLTSCR2 | 24.3074707 | 22.2439  |
| GLUD1   | 20.3680732 | 21.35434 |
| GLUD2   | 0          | 0.020458 |
| GLUDP2  | 0          | 0        |
| GLUDP3  | 0          | 0        |
| GLUDP4  | 0          | 0        |
| GLUDP5  | 0          | 0        |
| GLUL    | 798.126794 | 802.5603 |
| GLULL1  | 0          | 0        |
| GLULL2  | 0          | 0        |
| GLULL3  | 0          | 0        |
| GLULP   | 0          | 0        |
| GLYAT   | 0.00849165 | 0        |
| GLYATL1 | 0          | 0        |
| GLYATL2 | 0          | 0        |
| GLYCAM1 | 0          | 0        |
| GLYCTK  | 2.71258878 | 2.339458 |
| GM2A    | 1.09400096 | 0.886791 |
| GM2AP   | 0          | 0        |
| GMCL1   | 17.0550745 | 17.94947 |
| GMCL1L  | 0          | 0        |
| GMDS    | 0.41497364 | 0.599985 |
| GMEB1   | 6.45785634 | 7.445181 |
| GMEB2   | 10.0584003 | 10.56205 |
| GMFB    | 5.23467028 | 4.979683 |
| GMFG    | 260.752506 | 244.8133 |
| GMIP    | 153.263125 | 162.1091 |
| GML     | 0.02908068 | 0        |
| GMNN    | 3.23599744 | 2.39834  |
| GMPPA   | 6.11999568 | 5.133089 |
| GMPPB   | 2.20240982 | 1.789201 |
| GMPR    | 0.83268637 | 0.756756 |
| GMPR2   | 13.0830446 | 11.46989 |
| GMPS    | 5.04026045 | 5.375851 |
| GNA11   | 1.05582877 | 1.169822 |
| GNA12   | 1.44291487 | 1.546596 |
| GNA13   | 26.682281  | 27.65465 |

|        |            |          |
|--------|------------|----------|
| GNA14  | 0.00844052 | 0.057531 |
| GNA15  | 42.1887269 | 43.25535 |
| GNAI1  | 0.05703073 | 0.043192 |
| GNAI2  | 381.447288 | 379.1218 |
| GNAI3  | 18.4071661 | 16.77007 |
| GNAL   | 0.48754391 | 0.583529 |
| GNAO1  | 0.01326854 | 0.018088 |
| GNAQ   | 20.9381693 | 19.02227 |
| GNAQP  | 0          | 0        |
| GNAS   | 90.7030679 | 107.6176 |
| GNASAS | 0          | 0        |
| GNAT1  | 0.00584199 | 0        |
| GNAT2  | 1.40168873 | 0.874912 |
| GNAT3  | 0          | 0        |
| GNAZ   | 0.01310806 | 0        |
| GNB1   | 104.958613 | 110.041  |
| GNB1L  | 9.37073671 | 12.68946 |
| GNB2   | 123.940788 | 147.947  |
| GNB2L1 | 102.927432 | 105.3615 |
| GNB3   | 0.01093361 | 0.049683 |
| GNB4   | 2.92091172 | 2.987497 |
| GNB5   | 0.31173204 | 0.316459 |
| GNE    | 2.29549318 | 1.767647 |
| GNG10  | 6.38359446 | 6.062405 |
| GNG11  | 0.02203913 | 0        |
| GNG12  | 0          | 0        |
| GNG13  | 0.02136721 | 0        |
| GNG2   | 16.8998319 | 10.81578 |
| GNG3   | 0          | 0        |
| GNG4   | 0.00791616 | 0.004496 |
| GNG5   | 55.5632195 | 68.21777 |
| GNG5P  | 0          | 0        |
| GNG5P2 | 0          | 0        |
| GNG5P3 | 0          | 0        |
| GNG5P4 | 0          | 0        |
| GNG5P5 | 0          | 0        |
| GNG7   | 1.89156981 | 1.590036 |
| GNG8   | 0          | 0        |
| GNGT1  | 0          | 0        |
| GNGT2  | 3.03249966 | 2.755974 |
| GNL1   | 7.92907393 | 7.363318 |
| GNL2   | 10.5914448 | 9.426763 |
| GNL3   | 3.7888785  | 3.601723 |
| GNL3L  | 5.16546733 | 4.90579  |
| GNL3LP | 0          | 0        |
| GPLY   | 1.83014014 | 1.692265 |
| GNMT   | 1.85054411 | 2.281162 |

|            |            |          |
|------------|------------|----------|
| GNPAT      | 12.4112215 | 10.19573 |
| GNPATP     | 0          | 0        |
| GNPDA1     | 1.72999023 | 1.840516 |
| GNPDA2     | 1.57854414 | 1.531735 |
| GNPNAT1    | 0.34792426 | 0.194583 |
| GNPTAB     | 7.81101343 | 9.417922 |
| GNPTG      | 17.3853314 | 15.12264 |
| GNRH1      | 3.28581916 | 3.443899 |
| GNRH2      | 0          | 0        |
| GNRHR      | 0.00359838 | 0.016351 |
| GNRHR2     | 0          | 0        |
| GNS        | 18.4340655 | 13.76841 |
| GOLGA1     | 11.8520506 | 11.21847 |
| GOLGA2     | 22.1308883 | 20.44251 |
| GOLGA2L1   | 0.56599523 | 0.621898 |
| GOLGA2P2Y  | 0          | 0        |
| GOLGA2P3Y  | 0          | 0        |
| GOLGA3     | 6.35395864 | 6.50309  |
| GOLGA4     | 13.7284328 | 13.50864 |
| GOLGA4P1   | 0          | 0        |
| GOLGA5     | 14.3999154 | 11.96321 |
| GOLGA6     | 0.01324013 | 0.022562 |
| GOLGA6B    | 0.0066159  | 0.05261  |
| GOLGA6C    | 0.02441258 | 0.027733 |
| GOLGA6D    | 0.0182882  | 0.041551 |
| GOLGA6L11P | 0          | 0        |
| GOLGA6L12P | 0          | 0        |
| GOLGA6L13P | 0          | 0        |
| GOLGA6L14P | 0          | 0        |
| GOLGA6L16P | 0          | 0        |
| GOLGA7     | 15.6756308 | 13.55362 |
| GOLGA7B    | 0          | 0.008253 |
| GOLGA8A    | 3.52231592 | 3.923754 |
| GOLGA8B    | 18.5222157 | 17.47992 |
| GOLGA8C    | 0          | 0        |
| GOLGA8D    | 0          | 0        |
| GOLGA8E    | 0.78198351 | 0.88379  |
| GOLGA8F    | 0          | 0.008521 |
| GOLGA8G    | 0.01200076 | 0.018177 |
| GOLGA9P    | 0          | 0        |
| GOLGB1     | 12.6753515 | 11.53148 |
| GOLIM4     | 22.7366951 | 25.01288 |
| GOLM1      | 1.05648375 | 1.052012 |
| GOLPH3     | 27.4680706 | 30.48118 |
| GOLPH3L    | 1.80349733 | 1.868025 |
| GOLSYN     | 0.01389645 | 0.010524 |
| GOLT1A     | 0.02381125 | 0        |

|         |            |          |
|---------|------------|----------|
| GOLT1B  | 8.43712089 | 7.920337 |
| GON4L   | 14.7362055 | 13.1029  |
| GOPC    | 4.99146106 | 4.191826 |
| GORAB   | 0.09618175 | 0.054632 |
| GORASP1 | 8.68661858 | 9.125878 |
| GORASP2 | 9.15388559 | 8.257997 |
| GOSR1   | 5.03050214 | 4.925705 |
| GOSR2   | 5.25527916 | 4.840218 |
| GOT1    | 1.46297554 | 1.718111 |
| GOT1L1  | 0          | 0        |
| GOT2    | 1.90748814 | 1.776498 |
| GOT2L1  | 0          | 0        |
| GOT2L2  | 0          | 0        |
| GOT2P5  | 0          | 0        |
| GP1BA   | 1.64820832 | 1.552241 |
| GP1BB   | 0.02194711 | 0.199458 |
| GP2     | 0          | 0        |
| GP5     | 0.01203855 | 0.006838 |
| GP6     | 0.01854086 | 0.042125 |
| GP9     | 0.0490101  | 0.027838 |
| GPA33   | 0.01505573 | 0.008552 |
| GPAA1   | 15.6647362 | 16.02741 |
| GPAA1P1 | 0          | 0        |
| GPAM    | 0.26731311 | 0.202448 |
| GPATCH1 | 3.45836051 | 2.671267 |
| GPATCH2 | 0.89105641 | 0.889557 |
| GPATCH3 | 9.02637506 | 8.481514 |
| GPATCH4 | 0.19240262 | 0.29143  |
| GPATCH8 | 13.1883381 | 12.32207 |
| GPBAR1  | 0.22043532 | 0.17887  |
| GPBP1   | 28.5676588 | 24.77832 |
| GPBP1L1 | 47.3266813 | 45.41877 |
| GPC1    | 0.06844926 | 0.071279 |
| GPC2    | 0.41519216 | 0.282999 |
| GPC3    | 0.018188   | 0.010331 |
| GPC4    | 0          | 0.006431 |
| GPC5    | 0.00729287 | 0        |
| GPC6    | 0.00296006 | 0        |
| GPD1    | 0.0584646  | 0.04151  |
| GPD1L   | 8.94248731 | 9.205847 |
| GPD2    | 10.1727759 | 10.20987 |
| GPER    | 0          | 0        |
| GPHA2   | 0.05629272 | 0.063949 |
| GPHB5   | 0          | 0.060931 |
| GPHN    | 0.18083153 | 0.21098  |
| GPI     | 187.130512 | 197.4694 |
| GPIHBP1 | 0          | 0        |

|         |            |          |
|---------|------------|----------|
| GPKOW   | 11.7090221 | 12.78114 |
| GPLD1   | 0          | 0.005928 |
| GPM6A   | 0.0055359  | 0.012578 |
| GPM6B   | 0.53937448 | 0.548546 |
| GPN1    | 8.59593267 | 8.503536 |
| GPN2    | 12.239249  | 12.82836 |
| GPN3    | 7.47919587 | 5.828032 |
| GPNMB   | 0          | 0.025906 |
| GPR1    | 0.01814092 | 0        |
| GPR101  | 0.01376904 | 0        |
| GPR107  | 12.6039106 | 12.15515 |
| GPR108  | 76.3007494 | 110.2629 |
| GPR110  | 0          | 0        |
| GPR111  | 0          | 0.021316 |
| GPR112  | 0.00211714 | 0        |
| GPR113  | 0.02726011 | 0.035392 |
| GPR114  | 56.1215893 | 50.46928 |
| GPR115  | 0          | 0        |
| GPR116  | 0          | 0        |
| GPR119  | 0          | 0        |
| GPR12   | 0          | 0        |
| GPR120  | 0.01766835 | 0        |
| GPR123  | 0          | 0.005577 |
| GPR124  | 0.01752403 | 0.019908 |
| GPR125  | 0.00461082 | 0        |
| GPR126  | 0.03624536 | 0.030881 |
| GPR128  | 0          | 0        |
| GPR132  | 37.3610185 | 45.19515 |
| GPR133  | 0.0078074  | 0.004435 |
| GPR135  | 0.08086666 | 0.039371 |
| GPR137  | 4.40934073 | 3.579936 |
| GPR137B | 41.9065118 | 47.29065 |
| GPR137C | 0.021631   | 0.043003 |
| GPR139  | 0          | 0        |
| GPR141  | 1.87807967 | 0.676485 |
| GPR142  | 0          | 0        |
| GPR143  | 0.03925077 | 0.089179 |
| GPR143P | 0          | 0        |
| GPR144  | 0          | 0.016518 |
| GPR146  | 0          | 0        |
| GPR148  | 0.017713   | 0        |
| GPR149  | 0.00905094 | 0.020564 |
| GPR15   | 0.03882794 | 0.044109 |
| GPR150  | 0.01611136 | 0        |
| GPR151  | 0          | 0        |
| GPR152  | 0.19127313 | 0.417864 |
| GPR153  | 19.1081275 | 34.03991 |



|         |            |          |
|---------|------------|----------|
| GPR155  | 0.04220259 | 0.051139 |
| GPR156  | 0.00859932 | 0        |
| GPR157  | 0.12764728 | 0.186441 |
| GPR158  | 0.00631107 | 0.007169 |
| GPR160  | 122.74868  | 125.3435 |
| GPR161  | 0.015714   | 0.008926 |
| GPR162  | 0.02506995 | 0.009493 |
| GPR165P | 0          | 0        |
| GPR166P | 0          | 0        |
| GPR17   | 0          | 0        |
| GPR171  | 0.07027966 | 0        |
| GPR172A | 7.47494997 | 6.729241 |
| GPR172B | 0          | 0        |
| GPR173  | 0.04952964 | 0.014067 |
| GPR174  | 3.34265993 | 0.892369 |
| GPR175  | 14.6551849 | 14.8667  |
| GPR176  | 1.09009173 | 1.178988 |
| GPR177  | 0.01378258 | 0.007829 |
| GPR179  | 0          | 0        |
| GPR18   | 0.01265824 | 0        |
| GPR180  | 0.3538174  | 0.408032 |
| GPR182  | 0.02678386 | 0.060854 |
| GPR183  | 5.52430264 | 4.710117 |
| GPR19   | 0.06031363 | 0.027407 |
| GPR20   | 0          | 0        |
| GPR21   | 0          | 0        |
| GPR22   | 0          | 0        |
| GPR25   | 0          | 0.109968 |
| GPR26   | 0.00408021 | 0        |
| GPR27   | 1.26748449 | 1.418708 |
| GPR3    | 0.07967913 | 0.113146 |
| GPR31   | 0          | 0.02488  |
| GPR32   | 0.01963149 | 0        |
| GPR32P  | 0          | 0        |
| GPR33   | 0          | 0        |
| GPR34   | 11.9521591 | 14.13533 |
| GPR35   | 12.0433096 | 16.39474 |
| GPR37   | 0.00710796 | 0.016149 |
| GPR37L1 | 0.01710072 | 0.019427 |
| GPR39   | 0.4173763  | 0.321742 |
| GPR4    | 0.01379615 | 0.007836 |
| GPR42P  | 0          | 0        |
| GPR44   | 222.76013  | 194.8237 |
| GPR45   | 0.0121886  | 0.027693 |
| GPR50   | 0.01046036 | 0        |
| GPR52   | 0          | 0        |
| GPR53P  | 0          | 0        |

|         |            |          |
|---------|------------|----------|
| GPR55   | 0          | 0.043677 |
| GPR56   | 0.92602206 | 1.404388 |
| GPR6    | 0          | 0        |
| GPR61   | 0.05958294 | 0.033844 |
| GPR62   | 0.00959623 | 0.032704 |
| GPR63   | 0          | 0        |
| GPR64   | 0.02641926 | 0.015006 |
| GPR65   | 77.9159927 | 37.92476 |
| GPR68   | 0.06724519 | 0.195223 |
| GPR75   | 1.74962565 | 1.332597 |
| GPR77   | 2.64654516 | 1.558935 |
| GPR78   | 0          | 0.012306 |
| GPR79   | 0          | 0        |
| GPR81   | 0          | 0.008023 |
| GPR82   | 4.75679474 | 4.760082 |
| GPR83   | 0.029461   | 0.066936 |
| GPR84   | 0.26685457 | 0.095732 |
| GPR85   | 0.00426218 | 0        |
| GPR87   | 0          | 0        |
| GPR88   | 0.0364075  | 0.013786 |
| GPR89A  | 6.50027856 | 5.255686 |
| GPR89B  | 2.05682585 | 2.246284 |
| GPR89C  | 0.28140978 | 0.076116 |
| GPR89P  | 0          | 0        |
| GPR97   | 604.351607 | 616.9121 |
| GPR98   | 0.00326261 | 0.002471 |
| GPRASP1 | 1.8134392  | 1.596074 |
| GPRASP2 | 0.09417841 | 0.060181 |
| GPRC5A  | 0          | 0        |
| GPRC5B  | 0          | 0        |
| GPRC5C  | 0          | 0        |
| GPRC5D  | 0          | 0.046021 |
| GPRC6A  | 0          | 0        |
| GPRIN1  | 0.16488496 | 0.170284 |
| GPRIN2  | 0          | 0.013102 |
| GPRIN3  | 0.01324013 | 0.030082 |
| GPS1    | 11.7560032 | 11.50211 |
| GPS2    | 57.3880684 | 57.1426  |
| GPSM1   | 0.11961895 | 0.167248 |
| GPSM2   | 2.01033497 | 1.606516 |
| GPSM3   | 262.065732 | 242.903  |
| GPSN2   | 5.47779474 | 4.045887 |
| GPT     | 0.02229622 | 0.037993 |
| GPT2    | 0.59416157 | 1.270545 |
| GPX1    | 179.09743  | 188.9003 |
| GPX2    | 0.31728367 | 0.192234 |
| GPX3    | 4.82352851 | 5.628802 |

|         |            |          |
|---------|------------|----------|
| GPX4    | 41.7746937 | 53.13898 |
| GPX5    | 0          | 0        |
| GPX6    | 0          | 0.013952 |
| GPX7    | 11.617909  | 15.70928 |
| GPX8    | 0          | 0        |
| GPXP2   | 0          | 0        |
| GRAMD1A | 28.0178463 | 31.74729 |
| GRAMD1B | 7.47042726 | 8.598985 |
| GRAMD1C | 0.00559036 | 0        |
| GRAMD2  | 0.0063868  | 0        |
| GRAMD3  | 0.02171291 | 0.008222 |
| GRAMD4  | 20.6404836 | 24.18395 |
| GRAP    | 0.24820853 | 0.387707 |
| GRAP2   | 0.20320874 | 0.138509 |
| GRASP   | 15.2683951 | 41.47751 |
| GRB10   | 14.2347389 | 19.12257 |
| GRB14   | 0.01761653 | 0        |
| GRB2    | 150.709114 | 139.725  |
| GRB7    | 0.00916935 | 0.020833 |
| GREB1   | 0.01016699 | 0.00231  |
| GREM1   | 0.00508595 | 0.011555 |
| GREM2   | 0.00502638 | 0.00571  |
| GRHL1   | 6.68827092 | 7.464097 |
| GRHL2   | 0.00401937 | 0        |
| GRHL3   | 0.06574982 | 0.049795 |
| GRHPR   | 4.7498521  | 4.893063 |
| GRIA1   | 0.00359715 | 0.004086 |
| GRIA2   | 0.00716366 | 0.008138 |
| GRIA3   | 0.00396929 | 0.004509 |
| GRIA4   | 0.00554027 | 0.012588 |
| GRID1   | 0.38463163 | 0.477784 |
| GRID2   | 0          | 0        |
| GRID2IP | 0.04993062 | 0.020626 |
| GRIFIN  | 0          | 0        |
| GRIK1   | 0.06277922 | 0.058351 |
| GRIK2   | 0.00453621 | 0.005153 |
| GRIK3   | 0.00228065 | 0.005182 |
| GRIK4   | 0.00732335 | 0.008319 |
| GRIK5   | 0.14302946 | 0.176024 |
| GRIN1   | 0.00480469 | 0.005458 |
| GRIN2A  | 0.00568829 | 0        |
| GRIN2B  | 0          | 0        |
| GRIN2C  | 0.51774384 | 0.532149 |
| GRIN2D  | 0.03715452 | 0.018759 |
| GRIN3A  | 0.29491199 | 0.270479 |
| GRIN3B  | 0.1615345  | 0.117444 |
| GRINA   | 15.4164393 | 22.16169 |

|                |            |          |
|----------------|------------|----------|
| GRINL1A        | 1.98371422 | 2.131875 |
| GRINL1B        | 0          | 0        |
| GRIP1          | 0.0666413  | 0.037853 |
| GRIP2          | 0.00613699 | 0        |
| GRIPAP1        | 29.9907599 | 31.52511 |
| GRK1 (NC_00001 | 0          | 0.042882 |
| GRK1 (NC_00001 | 0.04171693 | 0.023696 |
| GRK4           | 0.18172283 | 0.134186 |
| GRK5           | 21.1897198 | 23.38089 |
| GRK6           | 45.8971779 | 43.104   |
| GRK6PS         | 0          | 0        |
| GRK7           | 0.036126   | 0.05472  |
| GRLF1          | 5.21080033 | 4.672765 |
| GRM1           | 0.00909007 | 0.003442 |
| GRM2           | 0.16274445 | 0.149326 |
| GRM3           | 0          | 0        |
| GRM4           | 0.01626089 | 0.006158 |
| GRM5           | 0.00522628 | 0        |
| GRM6           | 0.00342265 | 0        |
| GRM7           | 0          | 0        |
| GRM8           | 0          | 0        |
| GRN            | 72.3435574 | 120.8245 |
| GRP            | 0          | 0        |
| GRPEL1         | 16.5798155 | 14.88055 |
| GRPEL2         | 1.59802759 | 2.094675 |
| GRPR           | 0.14116224 | 0.160363 |
| GRRP1          | 0          | 0        |
| GRSF1          | 2.36129699 | 2.189063 |
| GRTP1          | 0.13458604 | 0.101928 |
| GRWD1          | 0.80129679 | 0.623348 |
| GRXCR1         | 0          | 0        |
| GRXCR2         | 0          | 0        |
| GS85           | 0          | 0.01244  |
| GSC            | 0.03536641 | 0        |
| GSC2           | 0          | 0.038649 |
| GSDMA          | 0.00971596 | 0        |
| GSDMB          | 18.1744386 | 17.00296 |
| GSDMC          | 0.02324097 | 0        |
| GSDMD          | 36.8996364 | 41.86388 |
| GSG1           | 0          | 0        |
| GSG1L          | 0.01675325 | 0        |
| GSG2           | 0          | 0        |
| GSK3A          | 31.5331719 | 31.01008 |
| GSK3B          | 16.7840588 | 16.26126 |
| GSN            | 88.8708373 | 88.30615 |
| GSPT1          | 7.52681966 | 8.13888  |
| GSPT2          | 0.19921356 | 0.141444 |

|         |            |          |
|---------|------------|----------|
| GSR     | 21.7131623 | 18.95392 |
| GSS     | 4.08334059 | 4.337033 |
| GSTA1   | 0          | 0        |
| GSTA2   | 0          | 0        |
| GSTA3   | 0.0229785  | 0        |
| GSTA4   | 0          | 0        |
| GSTA4P  | 0          | 0        |
| GSTA5   | 0          | 0        |
| GSTAP1  | 0          | 0        |
| GSTCD   | 0.33795021 | 0.197443 |
| GSTK1   | 39.7011755 | 36.64591 |
| GSTM1   | 0.79843029 | 0.403124 |
| GSTM1L  | 0          | 0        |
| GSTM2   | 87.0602901 | 91.24396 |
| GSTM3   | 1.21251    | 1.047542 |
| GSTM3P  | 0          | 0        |
| GSTM4   | 16.7807806 | 17.38118 |
| GSTM5   | 0          | 0.030427 |
| GSTO1   | 59.8454683 | 88.62874 |
| GSTO2   | 0.1407318  | 0.175861 |
| GSTO3P1 | 0          | 0        |
| GSTP1   | 11.4783383 | 11.7431  |
| GSTPP   | 0          | 0        |
| GSTT1   | 0          | 0        |
| GSTT2   | 0.01878939 | 0.04269  |
| GSTT2B  | 0.03843753 | 0        |
| GSTTP1  | 0          | 0        |
| GSTTP2  | 0          | 0        |
| GSTZ1   | 0.63491127 | 0.457729 |
| GSX1    | 0          | 0.056399 |
| GSX2    | 0          | 0.019707 |
| GTDC1   | 6.56033345 | 5.855648 |
| GTF2A1  | 10.6859512 | 11.06327 |
| GTF2A1L | 0          | 0        |
| GTF2A2  | 4.9838806  | 3.623531 |
| GTF2B   | 16.4240427 | 17.71418 |
| GTF2E1  | 4.69309234 | 4.158041 |
| GTF2E2  | 5.91337433 | 5.598073 |
| GTF2F1  | 17.6296287 | 17.06882 |
| GTF2F2  | 8.15563044 | 6.784422 |
| GTF2F2L | 0          | 0        |
| GTF2H1  | 9.34326229 | 8.901705 |
| GTF2H2  | 1.33631012 | 0.795762 |
| GTF2H2B | 0.85591625 | 0.720671 |
| GTF2H2C | 0.22962137 | 0.15878  |
| GTF2H2D | 0.57140389 | 0.967062 |
| GTF2H3  | 2.52862784 | 2.444058 |

|           |            |          |
|-----------|------------|----------|
| GTF2H4    | 1.9481513  | 1.851235 |
| GTF2H5    | 5.47876107 | 4.52168  |
| GTF2I     | 147.135535 | 157.3232 |
| GTF2IP1   | 0          | 0        |
| GTF2IRD1  | 0.17163535 | 0.118381 |
| GTF2IRD2  | 13.4701853 | 15.5714  |
| GTF2IRD2B | 9.85287476 | 8.208216 |
| GTF2IRD2P | 0          | 0        |
| GTF3A     | 42.0806125 | 38.1073  |
| GTF3C1    | 9.12073946 | 8.580088 |
| GTF3C2    | 19.5610668 | 19.32135 |
| GTF3C3    | 4.98796994 | 4.544512 |
| GTF3C4    | 2.57242151 | 2.230348 |
| GTF3C5    | 21.6541098 | 20.40166 |
| GTF3C6    | 5.46658605 | 4.047897 |
| GTPBP1    | 88.2755623 | 102.5257 |
| GTPBP10   | 2.41557144 | 2.296107 |
| GTPBP2    | 35.2045488 | 30.28334 |
| GTPBP3    | 0.48071409 | 0.411812 |
| GTPBP4    | 2.57282556 | 2.258505 |
| GTPBP5    | 6.55927585 | 6.495713 |
| GTPBP6    | 0.65926885 | 0.404832 |
| GTPBP8    | 4.55523014 | 3.50268  |
| GTSE1     | 0.01830279 | 0.088367 |
| GTSF1     | 0.36250571 | 0.411812 |
| GTSF1L    | 0.14982421 | 0.255304 |
| GUCA1A    | 0          | 0        |
| GUCA1B    | 1.19483158 | 1.315259 |
| GUCA1C    | 0          | 0        |
| GUCA2A    | 0          | 0        |
| GUCA2B    | 0          | 0        |
| GUCY1A2   | 0.00711758 | 0        |
| GUCY1A3   | 0.00832274 | 0.002364 |
| GUCY1B2   | 0          | 0        |
| GUCY1B3   | 0.01294265 | 0        |
| GUCY2C    | 0          | 0        |
| GUCY2D    | 0.00580329 | 0.013185 |
| GUCY2E    | 0          | 0        |
| GUCY2F    | 0.01137119 | 0        |
| GUCY2G    | 0          | 0        |
| GUF1      | 2.78276439 | 2.237813 |
| GUK1      | 79.8503006 | 81.68359 |
| GULOP     | 0          | 0        |
| GULP1     | 0          | 0.006921 |
| GUSB      | 64.9022466 | 56.17522 |
| GUSBL1    | 0          | 0        |
| GUSBL2    | 0          | 0        |

|         |            |          |
|---------|------------|----------|
| GUSBP1  | 0          | 0        |
| GVIN1   | 0          | 0        |
| GYG1    | 17.2279582 | 15.64111 |
| GYG2    | 0          | 0.014071 |
| GYG2P1  | 0          | 0        |
| GYLTL1B | 0.05821888 | 0.009448 |
| GYPA    | 0          | 0        |
| GYPB    | 0          | 0        |
| GYPC    | 0.43189289 | 0.289922 |
| GYPE    | 0          | 0.025356 |
| GYS1    | 7.11681149 | 9.340508 |
| GYS2    | 0          | 0.007626 |
| GZF1    | 6.05348592 | 10.74603 |
| GZMA    | 0.02346577 | 0        |
| GZMB    | 0.476302   | 0.283426 |
| GZMH    | 0          | 0.158881 |
| GZMK    | 0.0603598  | 0.06857  |
| GZMM    | 0.55505098 | 0.756656 |
| H19     | 0          | 0        |
| H1F0    | 7.20095026 | 7.442313 |
| H1FNT   | 0.08086666 | 0.146985 |
| H1FOO   | 0          | 0.022385 |
| H1FX    | 74.8406658 | 70.79718 |
| H2AFB1  | 0          | 0        |
| H2AFB2  | 0          | 0.068635 |
| H2AFB3  | 0.12200385 | 0        |
| H2AFJ   | 0.67657187 | 0.742542 |
| H2AFV   | 25.9732564 | 27.59177 |
| H2AFVP  | 0          | 0        |
| H2AFX   | 14.3510415 | 18.47575 |
| H2AFY   | 39.9910775 | 39.4315  |
| H2AFY2  | 0.00964907 | 0.010962 |
| H2AFZ   | 120.290647 | 98.71839 |
| H2AFZP  | 0          | 0        |
| H2AFZP2 | 0          | 0        |
| H2BFM   | 0          | 0        |
| H2BFO   | 0          | 0        |
| H2BFS   | 0          | 0        |
| H2BFWT  | 0          | 0        |
| H2BFXP  | 0          | 0        |
| H3F3A   | 700.129491 | 758.3807 |
| H3F3AP1 | 0          | 0        |
| H3F3AP2 | 0          | 0        |
| H3F3B   | 251.145829 | 281.3586 |
| H6PD    | 4.80835966 | 5.543588 |
| HAAO    | 3.17672446 | 2.511285 |
| HABP2   | 0          | 0.007912 |

|        |            |          |
|--------|------------|----------|
| HABP4  | 0.83694584 | 0.675323 |
| HACE1  | 1.38759833 | 1.148323 |
| HACL1  | 6.63903308 | 5.000577 |
| HADH   | 1.41855005 | 1.086822 |
| HADHA  | 17.9168774 | 16.05973 |
| HADHAP | 0          | 0        |
| HADHB  | 17.9407189 | 16.13446 |
| HAGH   | 15.8277647 | 15.69593 |
| HAGHL  | 1.35463692 | 1.75873  |
| HAL    | 0.34830112 | 0.388066 |
| HAMP   | 0          | 0        |
| HAND1  | 0.01209743 | 0        |
| HAND2  | 0.01775788 | 0.010087 |
| HAO1   | 0          | 0.01368  |
| HAO2   | 0          | 0        |
| HAP1   | 0.00531211 | 0.012069 |
| HAPLN1 | 0          | 0        |
| HAPLN2 | 0          | 0.026974 |
| HAPLN3 | 0.02221377 | 0.088323 |
| HAPLN4 | 0          | 0        |
| HAR1A  | 0          | 0        |
| HAR1B  | 0          | 0        |
| HARBI1 | 1.49194201 | 1.506551 |
| HARS   | 15.1802033 | 15.29912 |
| HARS2  | 26.5983103 | 23.31916 |
| HAS1   | 2.74024438 | 1.464923 |
| HAS2   | 0          | 0.007293 |
| HAS2AS | 0          | 0        |
| HAS3   | 0.16295197 | 0.149121 |
| HAT1   | 11.5786127 | 10.52859 |
| HAUS1  | 5.13952535 | 5.647501 |
| HAUS2  | 1.72635764 | 1.616149 |
| HAUS3  | 3.89719527 | 3.365241 |
| HAUS4  | 4.27344125 | 4.346821 |
| HAUS5  | 0.99051803 | 0.953409 |
| HAUS6  | 4.18444334 | 3.914724 |
| HAUS7  | 1.50180935 | 1.349354 |
| HAUS8  | 6.38268976 | 4.133961 |
| HAVCR1 | 0.04568241 | 0.012974 |
| HAVCR2 | 1.19626883 | 1.935517 |
| HAX1   | 33.4794844 | 30.14606 |
| HBA1   | 1.78861322 | 1.866024 |
| HBA2   | 4.761108   | 5.171817 |
| HBB    | 3.89606772 | 3.929978 |
| HBBP1  | 0          | 0        |
| HBCBP  | 0          | 0        |
| HBD    | 0          | 0        |



|            |            |          |
|------------|------------|----------|
| HBE1       | 0.02576634 | 0.029271 |
| HBEGF      | 0.04458297 | 0.070906 |
| HBG1       | 0          | 0        |
| HBG2       | 0.03606403 | 0        |
| HBII-52-24 | 0          | 0        |
| HBII-52-27 | 0          | 0        |
| HBII-52-28 | 0          | 0        |
| HBII-52-45 | 0          | 0        |
| HBII-52-46 | 0          | 0        |
| HBM        | 0          | 0        |
| HBP1       | 55.5547363 | 52.73467 |
| HBQ1       | 0          | 0        |
| HBS1L      | 1.81349956 | 1.515052 |
| HBXIP      | 55.952116  | 37.96327 |
| HBZ        | 0          | 0        |
| HBZP       | 0          | 0        |
| HCCA2      | 18.25884   | 18.55088 |
| HCCS       | 5.02311661 | 5.370074 |
| HCFC1      | 9.2799912  | 10.05748 |
| HCFC1R1    | 2.85944501 | 2.364626 |
| HCFC2      | 2.02441701 | 1.562344 |
| HCG11      | 0          | 0        |
| HCG18      | 0          | 0        |
| HCG22      | 0          | 0        |
| HCG26      | 0          | 0        |
| HCG27      | 0          | 0        |
| HCG2P6     | 0          | 0        |
| HCG2P7     | 0          | 0        |
| HCG2P8     | 0          | 0        |
| HCG4       | 0          | 0        |
| HCG4P10    | 0          | 0        |
| HCG4P11    | 0          | 0        |
| HCG4P3     | 0          | 0        |
| HCG4P4     | 0          | 0        |
| HCG4P5     | 0          | 0        |
| HCG4P6     | 0          | 0        |
| HCG4P7     | 0          | 0        |
| HCG4P9     | 0          | 0        |
| HCG9       | 0.06439611 | 0.036578 |
| HCG9P5     | 0          | 0        |
| HCK        | 169.380227 | 163.4569 |
| HCLS1      | 427.487484 | 461.3245 |
| HCN1       | 0.00391606 | 0.004449 |
| HCN2       | 0.52439939 | 1.254529 |
| HCN3       | 0.2262613  | 0.192777 |
| HCN4       | 0.00581775 | 0.006609 |
| HCP5       | 27.8090896 | 24.36615 |

|         |            |          |
|---------|------------|----------|
| HCP5P12 | 0          | 0        |
| HCP5P13 | 0          | 0        |
| HCP5P14 | 0          | 0        |
| HCP5P15 | 0          | 0        |
| HCP5P2  | 0          | 0        |
| HCP5P3  | 0          | 0        |
| HCP5P6  | 0          | 0        |
| HCP9    | 0          | 0        |
| HCRP1   | 0          | 0        |
| HCRT    | 0          | 0.124186 |
| HCRTR1  | 0.03152224 | 0.03581  |
| HCRTR2  | 0.01157783 | 0        |
| HCST    | 25.7943903 | 34.34368 |
| HDAC1   | 98.36959   | 99.94964 |
| HDAC10  | 22.2929542 | 21.28059 |
| HDAC11  | 0.36250571 | 0.123544 |
| HDAC2   | 4.41705975 | 4.20191  |
| HDAC3   | 13.9340111 | 11.00311 |
| HDAC4   | 2.82726988 | 2.618421 |
| HDAC5   | 24.0013211 | 25.54411 |
| HDAC6   | 15.4394355 | 13.55374 |
| HDAC7   | 26.666393  | 34.27986 |
| HDAC8   | 3.00537111 | 2.327196 |
| HDAC9   | 0.00878129 | 0.009976 |
| HDC     | 0.74217323 | 0.803444 |
| HDDC2   | 0.950371   | 1.005689 |
| HDDC3   | 0.24143921 | 0.114283 |
| HDGF    | 46.7772285 | 45.22634 |
| HDGF2   | 13.5982011 | 14.43446 |
| HDGFL1  | 0          | 0        |
| HDGFP   | 0          | 0        |
| HDGFRP3 | 1.68373152 | 2.251713 |
| HDHD1A  | 1.92264231 | 1.924649 |
| HDHD1CP | 0          | 0        |
| HDHD1P1 | 0          | 0        |
| HDHD2   | 1.54923491 | 1.552259 |
| HDHD3   | 4.99672305 | 4.288494 |
| HDLBP   | 12.8393168 | 11.31684 |
| HDX     | 0.0146518  | 0.008322 |
| HEATR1  | 2.13008801 | 2.046994 |
| HEATR2  | 0.97921137 | 0.776581 |
| HEATR3  | 1.60192998 | 1.555944 |
| HEATR4  | 0.1818276  | 0.22033  |
| HEATR5A | 8.56837437 | 6.535657 |
| HEATR5B | 9.47873431 | 6.551525 |
| HEATR6  | 2.47388265 | 1.778485 |
| HEATR7A | 6.27697113 | 6.823732 |

|          |            |          |
|----------|------------|----------|
| HEATR7B1 | 0.00794158 | 0.013533 |
| HEATR7B2 | 0.01194621 | 0        |
| HEBP1    | 0.797085   | 0.62379  |
| HEBP2    | 20.0741069 | 18.33303 |
| HECA     | 36.4735816 | 41.70227 |
| HECTD1   | 19.3587731 | 18.63687 |
| HECTD2   | 0.01441078 | 0        |
| HECTD3   | 11.3877551 | 9.414473 |
| HECW1    | 0.00922298 | 0.003492 |
| HECW2    | 0.05464279 | 0.017243 |
| HEG1     | 0.02296345 | 0.028696 |
| HEJ1     | 0          | 0        |
| HELB     | 2.19117909 | 1.007033 |
| HELLS    | 0.03392277 | 0.015415 |
| HELQ     | 5.27974625 | 5.106839 |
| HELT     | 0          | 0.024273 |
| HELZ     | 8.39340942 | 7.443588 |
| HEMGN    | 0.01876424 | 0        |
| HEMK1    | 1.36295219 | 1.104208 |
| HEPACAM  | 0.01185862 | 0.013472 |
| HEPACAM2 | 0          | 0        |
| HEPH     | 0.14591118 | 0.128328 |
| HEPHL1   | 0.00353308 | 0.008027 |
| HEPN1    | 0.02944724 | 0        |
| HERC1    | 25.7237599 | 24.83599 |
| HERC2    | 3.12761053 | 2.367638 |
| HERC2P2  | 0          | 0        |
| HERC2P3  | 0          | 0        |
| HERC2P4  | 0          | 0        |
| HERC2P5  | 0          | 0        |
| HERC2P6  | 0          | 0        |
| HERC2P7  | 0          | 0        |
| HERC3    | 39.8596283 | 39.20008 |
| HERC4    | 4.42663045 | 4.055762 |
| HERC5    | 2.42392799 | 2.311682 |
| HERC6    | 3.48710169 | 3.095422 |
| HERPUD1  | 22.6002983 | 22.44717 |
| HERPUD2  | 36.9803142 | 45.9815  |
| HERV-FRD | 0          | 0        |
| HES1     | 22.9788201 | 47.70446 |
| HES2     | 0.00493321 | 0.005604 |
| HES3     | 0.03060456 | 0        |
| HES4     | 34.5098461 | 41.59224 |
| HES5     | 0.03219806 | 0.018289 |
| HES6     | 15.4543856 | 26.06441 |
| HES7     | 0.01658149 | 0        |
| HESRG    | 0          | 0        |

|        |            |          |
|--------|------------|----------|
| HESX1  | 0          | 0.08145  |
| HEXA   | 26.2277415 | 26.12955 |
| HEXB   | 33.9325173 | 34.26338 |
| HEXDC  | 4.5040763  | 4.751223 |
| HEXIM1 | 21.051695  | 19.67215 |
| HEXIM2 | 2.81391647 | 2.96319  |
| HEY1   | 0.10033781 | 0.632101 |
| HEY2   | 0.02360628 | 0.098329 |
| HEYL   | 0.01022136 | 0.005806 |
| HFE    | 0.02838704 | 0.010749 |
| HFE2   | 0.00949225 | 0.021567 |
| HFM1   | 0.00426391 | 0.009688 |
| HGC6.3 | 0          | 0.023509 |
| HGD    | 0.04380277 | 0.02488  |
| HGF    | 0.24539369 | 0.189564 |
| HGFAC  | 0.01031665 | 0.03516  |
| HGS    | 41.6100761 | 42.58458 |
| HGSNAT | 29.8201616 | 31.55363 |
| HHAT   | 0.04492592 | 0.063796 |
| HHATL  | 0.01201447 | 0        |
| HHEX   | 33.0141922 | 42.58312 |
| HHIP   | 0.01191237 | 0        |
| HHIPL1 | 0.00538421 | 0.006117 |
| HHIPL2 | 0          | 0.018559 |
| HHLA1  | 0          | 0        |
| HHLA2  | 0          | 0        |
| HHLA3  | 0.11680739 | 0.053078 |
| HIAT1  | 19.560484  | 19.71584 |
| HIATL1 | 15.1027923 | 15.68682 |
| HIATL2 | 0          | 0        |
| HIBADH | 1.07358869 | 0.7849   |
| HIBCH  | 2.24010475 | 1.756461 |
| HIC1   | 42.0572447 | 54.18644 |
| HIC2   | 1.45674182 | 1.331635 |
| HIF1A  | 193.423721 | 177.7349 |
| HIF1AN | 24.5538877 | 22.79314 |
| HIF3A  | 0.01394253 | 0.00396  |
| HIGD1A | 7.77008139 | 7.325809 |
| HIGD1B | 0.16901391 | 0.0384   |
| HIGD1C | 0.14302946 | 0.081242 |
| HIGD1D | 0          | 0        |
| HIGD2A | 15.62275   | 14.46398 |
| HIGD2B | 0          | 0        |
| HILS1  | 0          | 0        |
| HIN1L  | 0          | 0        |
| HINFP  | 11.0611524 | 11.49601 |
| HINT1  | 19.1163815 | 14.87474 |

|             |            |          |
|-------------|------------|----------|
| HINT2       | 0.29022696 | 0.40297  |
| HINT3       | 5.11948147 | 4.480225 |
| HINTP1      | 0          | 0        |
| HIP1        | 54.8999594 | 43.46767 |
| HIP1R       | 43.3856036 | 51.7217  |
| HIPK1       | 42.2975786 | 39.64985 |
| HIPK2       | 7.69285804 | 4.946722 |
| HIPK3       | 15.1650131 | 13.60691 |
| HIPK4       | 0.07717291 | 0.048705 |
| HIRA        | 33.583945  | 31.17028 |
| HIRIP3      | 2.12585471 | 1.630383 |
| HISPPD1     | 11.6254434 | 8.543642 |
| HISPPD2A    | 0.86121732 | 0.722415 |
| HISPPD2B    | 0          | 0        |
| HIST1H1A    | 0          | 0        |
| HIST1H1B    | 0          | 0        |
| HIST1H1C    | 28.2922828 | 28.81223 |
| HIST1H1D    | 0          | 0.03074  |
| HIST1H1E    | 0.02678386 | 0        |
| HIST1H1PS2  | 0          | 0        |
| HIST1H1T    | 0          | 0        |
| HIST1H2AA   | 0          | 0        |
| HIST1H2AB   | 0          | 0        |
| HIST1H2AC   | 3.85079322 | 3.49965  |
| HIST1H2AD   | 0          | 0.051924 |
| HIST1H2AE   | 0.14911582 | 0.169398 |
| HIST1H2AG   | 0.02802132 | 0.031833 |
| HIST1H2AH   | 0          | 0.108816 |
| HIST1H2AI   | 0.04483013 | 0.050928 |
| HIST1H2AJ   | 0          | 0        |
| HIST1H2AK   | 0.18282896 | 0        |
| HIST1H2AL   | 0          | 0.101639 |
| HIST1H2AM   | 0.04317316 | 0        |
| HIST1H2APS2 | 0          | 0        |
| HIST1H2APS4 | 0          | 0        |
| HIST1H2APS5 | 0          | 0        |
| HIST1H2BA   | 0          | 0        |
| HIST1H2BB   | 0          | 0        |
| HIST1H2BC   | 1.05606685 | 0.817983 |
| HIST1H2BD   | 0.30437562 | 0.452168 |
| HIST1H2BE   | 0          | 0.054908 |
| HIST1H2BF   | 0.09779224 | 0        |
| HIST1H2BG   | 0.04724793 | 0.053674 |
| HIST1H2BH   | 0.1484141  | 0.168601 |
| HIST1H2BI   | 0          | 0        |
| HIST1H2BJ   | 0.13113512 | 0.198629 |
| HIST1H2BK   | 24.5380997 | 22.54521 |

|             |            |          |
|-------------|------------|----------|
| HIST1H2BL   | 0          | 0.15818  |
| HIST1H2BM   | 0          | 0        |
| HIST1H2BN   | 0.42144316 | 0.106392 |
| HIST1H2BO   | 0          | 0        |
| HIST1H2BPS2 | 0          | 0        |
| HIST1H3A    | 0.04483013 | 0        |
| HIST1H3B    | 0.04454519 | 0        |
| HIST1H3C    | 0          | 0.104075 |
| HIST1H3D    | 0.04866975 | 0.138224 |
| HIST1H3E    | 0          | 0        |
| HIST1H3F    | 0          | 0        |
| HIST1H3G    | 0          | 0        |
| HIST1H3H    | 0.04445102 | 0        |
| HIST1H3I    | 0          | 0        |
| HIST1H3J    | 0          | 0        |
| HIST1H4A    | 0          | 0        |
| HIST1H4B    | 0          | 0        |
| HIST1H4C    | 0.05391111 | 0.061244 |
| HIST1H4D    | 0          | 0        |
| HIST1H4E    | 0          | 0.126711 |
| HIST1H4F    | 0.05713405 | 0        |
| HIST1H4G    | 0          | 0        |
| HIST1H4H    | 0.39352224 | 0.383184 |
| HIST1H4I    | 0          | 0        |
| HIST1H4J    | 0.6496591  | 0.805116 |
| HIST1H4K    | 1.42544617 | 0.877137 |
| HIST1H4L    | 0          | 0        |
| HIST1H4PS1  | 0          | 0        |
| HIST2H2AA3  | 5.55163233 | 5.099068 |
| HIST2H2AA4  | 5.31539266 | 5.72527  |
| HIST2H2AB   | 0.3285208  | 0        |
| HIST2H2AC   | 3.36790198 | 3.607362 |
| HIST2H2BB   | 0          | 0        |
| HIST2H2BC   | 0          | 0        |
| HIST2H2BD   | 0          | 0        |
| HIST2H2BE   | 1.06876401 | 0.988498 |
| HIST2H2BF   | 0.28080576 | 0.212667 |
| HIST2H3A    | 0.04147008 | 0.047111 |
| HIST2H3C    | 0.12441024 | 0.047111 |
| HIST2H3D    | 0.10231305 | 0        |
| HIST2H3PS2  | 0          | 0        |
| HIST2H4A    | 0.63713124 | 0.30158  |
| HIST2H4B    | 0.69022551 | 0.361896 |
| HIST3H2A    | 0.16955912 | 0        |
| HIST3H2BA   | 0          | 0        |
| HIST3H2BB   | 0.04651622 | 0.052843 |
| HIST3H3     | 0          | 0        |

|          |            |          |
|----------|------------|----------|
| HIST4H4  | 0.40825885 | 0.347841 |
| HIVEP1   | 5.425739   | 5.466605 |
| HIVEP2   | 1.06164516 | 1.331317 |
| HIVEP3   | 0.08768454 | 0.191145 |
| HJURP    | 0.04825486 | 0.023494 |
| HK1      | 26.9618373 | 28.83031 |
| HK2      | 86.6624244 | 79.68662 |
| HK2P     | 0          | 0        |
| HK3      | 63.0622867 | 62.35197 |
| HKDC1    | 0.01139893 | 0        |
| HKR1     | 4.0988269  | 3.563603 |
| HLA-A    | 2036.99493 | 2091.817 |
| HLA-B    | 2820.5107  | 2792.279 |
| HLA-C    | 3747.77558 | 3773.644 |
| HLA-DMA  | 13.2298428 | 10.64399 |
| HLA-DMB  | 13.1601851 | 8.917342 |
| HLA-DOA  | 0.08446331 | 0.095952 |
| HLA-DOB  | 2.78907452 | 3.742929 |
| HLA-DPA1 | 17.6998032 | 14.22372 |
| HLA-DPA2 | 0          | 0        |
| HLA-DPA3 | 0          | 0        |
| HLA-DPB1 | 16.0106284 | 13.62135 |
| HLA-DPB2 | 0          | 0        |
| HLA-DQA1 | 0.9408222  | 0.898402 |
| HLA-DQA2 | 0.15993523 | 0.195665 |
| HLA-DQB1 | 3.14349311 | 3.063695 |
| HLA-DQB2 | 0          | 0        |
| HLA-DRA  | 349.084309 | 321.3043 |
| HLA-DRB1 | 28.4004256 | 25.29855 |
| HLA-DRB5 | 7.37951411 | 8.587217 |
| HLA-DRB6 | 0          | 0        |
| HLA-DRB9 | 0          | 0        |
| HLA-E    | 1408.523   | 1417.065 |
| HLA-F    | 199.406319 | 186.1294 |
| HLA-G    | 60.1980008 | 61.84699 |
| HLA-H    | 0          | 0        |
| HLA-J    | 0          | 0        |
| HLA-K    | 0          | 0        |
| HLA-L    | 0          | 0        |
| HLA-N    | 0          | 0        |
| HLA-P    | 0          | 0        |
| HLA-S    | 0          | 0        |
| HLA-T    | 0          | 0        |
| HLA-U    | 0          | 0        |
| HLA-V    | 0          | 0        |
| HLA-W    | 0          | 0        |
| HLA-X    | 0          | 0        |

|          |            |          |
|----------|------------|----------|
| HLA-Z    | 0          | 0        |
| HLCS     | 0.36232376 | 0.455563 |
| HLF      | 0.01126558 | 0.004266 |
| HLTF     | 2.52256821 | 2.825504 |
| HLX      | 6.35649541 | 0.838442 |
| HM13     | 5.4220232  | 4.40989  |
| HMBOX1   | 5.8629476  | 5.159944 |
| HMBS     | 0.34144822 | 0.417728 |
| HMCN1    | 0.00692686 | 0.002623 |
| HMCN2    | 0.00924109 | 0.004199 |
| HMG20A   | 4.78414223 | 4.186811 |
| HMG20B   | 194.245387 | 182.2597 |
| HMGA1    | 46.9215303 | 77.62661 |
| HMGA1L1  | 0          | 0        |
| HMGA1L2  | 0          | 0        |
| HMGA1L3  | 0          | 0        |
| HMGA1L5  | 0          | 0        |
| HMGA2    | 0          | 0.010365 |
| HMGB1    | 86.3768191 | 102.6753 |
| HMGB1L1  | 0.99176089 | 0.751104 |
| HMGB1L10 | 0          | 0        |
| HMGB1L14 | 0          | 0        |
| HMGB1L3  | 0          | 0        |
| HMGB1L4  | 0          | 0        |
| HMGB1L5  | 0          | 0        |
| HMGB1L8  | 0          | 0        |
| HMGB1L9  | 0          | 0        |
| HMGB2    | 152.455909 | 154.1767 |
| HMGB3    | 1.30077976 | 1.544875 |
| HMGB3L1  | 0          | 0        |
| HMGB3L2  | 0          | 0        |
| HMGB4    | 0          | 0        |
| HMGCL    | 5.85780365 | 4.753256 |
| HMGCLL1  | 0          | 0        |
| HMGCR    | 5.48806107 | 4.321422 |
| HMGCS1   | 5.34318952 | 4.838266 |
| HMGCS2   | 0          | 0        |
| HMGN1    | 120.653797 | 182.4353 |
| HMGN1L1  | 0          | 0        |
| HMGN1L2  | 0          | 0        |
| HMGN2    | 123.194131 | 144.6814 |
| HMGN2L   | 0          | 0        |
| HMGN2L1  | 0          | 0        |
| HMGN2L10 | 0          | 0        |
| HMGN2L11 | 0          | 0        |
| HMGN2L2  | 0          | 0        |
| HMGN2L3  | 0          | 0        |



|           |            |          |
|-----------|------------|----------|
| HMG2L4    | 0          | 0        |
| HMG2L5    | 0          | 0        |
| HMG2L6    | 0          | 0        |
| HMG2L7    | 0          | 0        |
| HMG2L9    | 0          | 0        |
| HMG3      | 1.39255721 | 1.192959 |
| HMG4      | 18.6654538 | 15.85467 |
| HMGXB3    | 11.6208382 | 10.56117 |
| HMGXB4    | 5.53745346 | 4.905333 |
| HMHA1     | 183.513073 | 224.4102 |
| HMHB1     | 0          | 0        |
| HMMR      | 0.0200815  | 0.05323  |
| HMOX1     | 3.05206417 | 6.379636 |
| HMOX2     | 16.9748484 | 13.89315 |
| HMP19     | 0.06303097 | 0.020458 |
| HMSD      | 0          | 0        |
| HMX1      | 0.01108931 | 0        |
| HMX2      | 0.01291482 | 0        |
| HMX3      | 0.01957666 | 0.022239 |
| HN1       | 201.704413 | 268.7462 |
| HN1L      | 2.86008439 | 2.153097 |
| HNF1A     | 0.18175649 | 0.221227 |
| HNF1B     | 0          | 0        |
| HNF4A     | 0          | 0.006501 |
| HNF4G     | 0          | 0        |
| HNMT      | 0.00503239 | 0.011434 |
| HNRNPA0   | 83.2934749 | 66.99423 |
| HNRNPA1   | 65.5881103 | 55.89736 |
| HNRNPA1L1 | 0          | 0        |
| HNRNPA1L2 | 10.970511  | 10.78617 |
| hnRNPA1p  | 0          | 0        |
| HNRNPA1P1 | 0          | 0        |
| HNRNPA1P2 | 0          | 0        |
| HNRNPA1P3 | 0          | 0        |
| HNRNPA1P4 | 0          | 0        |
| HNRNPA2B1 | 234.81126  | 229.8119 |
| HNRNPA3   | 33.7100348 | 32.38966 |
| HNRNPA3P1 | 0          | 0        |
| HNRNPA3P2 | 0          | 0        |
| HNRNPAB   | 27.2310454 | 38.39242 |
| HNRNPC    | 76.3364338 | 77.62661 |
| HNRNPCL1  | 0.05692779 | 0.043114 |
| HNRNPD    | 88.6100789 | 84.18522 |
| HNRNPDP   | 0          | 0        |
| HNRNPF    | 44.9151994 | 39.39731 |
| HNRNPH1   | 166.837731 | 175.6177 |
| HNRNPH2   | 55.5286711 | 50.4631  |

|           |            |          |
|-----------|------------|----------|
| HNRNPH3   | 60.3388644 | 55.14767 |
| HNRNPK    | 164.71088  | 160.9139 |
| HNRNPL    | 68.393191  | 60.29358 |
| HNRNPM    | 35.7090303 | 35.15345 |
| HNRNPR    | 25.4743247 | 23.6934  |
| HNRNPU    | 43.8104508 | 41.77277 |
| HNRNPUL1  | 170.492051 | 174.9092 |
| HNRNPUL2  | 61.133894  | 56.03568 |
| HNRPA1L-2 | 0          | 0        |
| HNRPA1L3  | 0          | 0        |
| HNRPA1P5  | 0          | 0        |
| HNRPA1P6  | 0          | 0        |
| HNRPCP    | 0          | 0        |
| HNRPDL    | 40.6789238 | 35.75962 |
| HNRPLL    | 4.9186112  | 4.415007 |
| HNRPUP    | 0          | 0        |
| HOMER1    | 0.66359018 | 0.600812 |
| HOMER2    | 0.11663068 | 0.144539 |
| HOMER3    | 5.74807885 | 13.81238 |
| HOMEZ     | 1.74227549 | 1.577017 |
| HOOK1     | 0.86169389 | 0.81167  |
| HOOK2     | 0.52361935 | 0.640597 |
| HOOK3     | 2.86550217 | 3.174205 |
| HOPX      | 0.02217862 | 0.062988 |
| HORMAD1   | 0.15665494 | 0.190674 |
| HORMAD2   | 0.01109516 | 0        |
| HOTAIR    | 0          | 0        |
| HOXA1     | 0.16496925 | 0.140556 |
| HOXA10    | 0.10568812 | 0.195103 |
| HOXA11    | 0          | 0.009003 |
| HOXA11AS  | 0          | 0        |
| HOXA13    | 0          | 0        |
| HOXA2     | 0.17737906 | 0.161204 |
| HOXA3     | 0.04143506 | 0.020173 |
| HOXA4     | 0.20684643 | 0.124402 |
| HOXA5     | 0.01578478 | 0.017932 |
| HOXA6     | 0          | 0        |
| HOXA7     | 0.05209448 | 0.023672 |
| HOXA9     | 0.27597663 | 0.638639 |
| HOXB1     | 0.02073504 | 0        |
| HOXB13    | 0.00692078 | 0        |
| HOXB2     | 0.05243225 | 0        |
| HOXB3     | 0.02905657 | 0.013203 |
| HOXB4     | 0.02068404 | 0.023497 |
| HOXB5     | 0          | 0        |
| HOXB6     | 0          | 0.014251 |
| HOXB7     | 0.03076127 | 0        |

|        |            |          |
|--------|------------|----------|
| HOXB8  | 0          | 0        |
| HOXB9  | 0.00778428 | 0        |
| HOXC10 | 0.01072721 | 0        |
| HOXC11 | 0          | 0        |
| HOXC12 | 0          | 0        |
| HOXC13 | 0.01755036 | 0.009969 |
| HOXC4  | 0.01797037 | 0        |
| HOXC5  | 0          | 0        |
| HOXC6  | 0          | 0        |
| HOXC8  | 0.00918137 | 0        |
| HOXC9  | 0.0136351  | 0        |
| HOXD1  | 0.01064574 | 0.012094 |
| HOXD10 | 0.02330968 | 0.01324  |
| HOXD11 | 0          | 0.016326 |
| HOXD12 | 0.02586142 | 0        |
| HOXD13 | 0          | 0.010264 |
| HOXD3  | 0          | 0        |
| HOXD4  | 0          | 0        |
| HOXD8  | 0          | 0.012712 |
| HOXD9  | 0          | 0        |
| HP     | 1.20480583 | 0.934707 |
| HP1BP3 | 64.3039451 | 63.21848 |
| HPCA   | 0          | 0        |
| HPCAL1 | 20.714994  | 22.29864 |
| HPCAL4 | 0.00987337 | 0.005608 |
| HPD    | 0.31028247 | 0.117495 |
| HPDL   | 0.05830652 | 0.039742 |
| HPGD   | 1.74037032 | 0.677859 |
| HPN    | 0.02669318 | 0.010108 |
| HPR    | 0.05078582 | 0.019231 |
| HPRT1  | 3.12036714 | 3.072148 |
| HPRTP2 | 0          | 0        |
| HPRTP3 | 0          | 0        |
| HPRTP4 | 0          | 0        |
| HPS1   | 32.0190674 | 31.01843 |
| HPS3   | 5.43701549 | 4.829611 |
| HPS4   | 5.29490931 | 4.457485 |
| HPS5   | 9.24166699 | 8.144431 |
| HPS6   | 5.57604168 | 5.377985 |
| HPSE   | 0.09014075 | 0.0384   |
| HPSE2  | 0.00916935 | 0        |
| HPVC1  | 0          | 0        |
| HPX    | 0.07568514 | 0.171959 |
| HPYR1  | 0          | 0        |
| HR     | 0.02287019 | 0.017321 |
| HRAS   | 1.38010681 | 1.316197 |
| HRASLS | 0          | 0        |

|           |            |          |
|-----------|------------|----------|
| HRASLS2   | 0          | 0        |
| HRASLS5   | 11.2880422 | 6.083943 |
| HRC       | 0.03526261 | 0.020029 |
| HRCT1     | 0          | 0.025142 |
| HRG       | 0          | 0        |
| HRH1      | 0.01309174 | 0.024787 |
| HRH2      | 0.90375682 | 0.654952 |
| HRH3      | 0.03138109 | 0.017825 |
| HRH4      | 25.6339368 | 13.31653 |
| HRK       | 0.75413669 | 0.514027 |
| HRNBP3    | 0.07063381 | 0.106988 |
| HRNR      | 0.0021849  | 0        |
| HRSP12    | 0.87345589 | 0.685132 |
| HS1BP3    | 7.01719327 | 6.411109 |
| HS2ST1    | 1.69591796 | 1.752342 |
| HS3ST1    | 0.02139983 | 0        |
| HS3ST2    | 0.01077117 | 0        |
| HS3ST3A1  | 0.02496082 | 0.018904 |
| HS3ST3B1  | 0.46562003 | 0.411407 |
| HS3ST4    | 0.03734517 | 0.042425 |
| HS3ST5    | 0.00766229 | 0.008704 |
| HS3ST6    | 0.01977924 | 0        |
| HS6ST1    | 8.1611482  | 7.355308 |
| HS6ST1P   | 0          | 0        |
| HS6ST2    | 0.01381125 | 0        |
| HS6ST3    | 0.00808667 | 0.012249 |
| HSBP1     | 24.6277674 | 22.5336  |
| HSBP1P1   | 0          | 0        |
| HSCB      | 1.46598638 | 1.227125 |
| HSD11B1   | 0.01414894 | 0        |
| HSD11B1L  | 0.14634801 | 0.152399 |
| HSD11B2   | 0.04463977 | 0.012678 |
| HSD17B1   | 4.95711523 | 4.860529 |
| HSD17B10  | 4.27929893 | 4.76214  |
| HSD17B11  | 72.0114779 | 66.65642 |
| HSD17B12  | 4.75032035 | 4.195145 |
| HSD17B13  | 1.51873998 | 1.575719 |
| HSD17B14  | 0          | 0        |
| HSD17B2   | 0          | 0        |
| HSD17B3   | 0.01854086 | 0.126376 |
| HSD17B4   | 33.0566674 | 23.65269 |
| HSD17B6   | 0.01390564 | 0.015797 |
| HSD17B7   | 11.7514852 | 9.418815 |
| HSD17B7P1 | 0          | 0        |
| HSD17B7P2 | 0          | 0        |
| HSD17B8   | 0.29762855 | 0.289809 |
| HSD17BP1  | 0          | 0        |

|           |            |          |
|-----------|------------|----------|
| HSD3B1    | 0.01251508 | 0        |
| HSD3B2    | 0          | 0        |
| HSD3B7    | 26.8165807 | 28.95743 |
| HSDL1     | 11.2902652 | 10.29224 |
| HSDL2     | 22.2567211 | 25.26167 |
| HSF1      | 41.0345679 | 48.80243 |
| HSF2      | 3.79656514 | 3.161655 |
| HSF2BP    | 0          | 0.012578 |
| HSF4      | 0.4497397  | 0.583899 |
| HSF5      | 0.05119389 | 0.075604 |
| HSFX1     | 0.47048229 | 0.677002 |
| HSFX2     | 0          | 0        |
| HSFY1     | 0          | 0        |
| HSFY2     | 0          | 0        |
| HSFY3P    | 0          | 0        |
| HSFY4P    | 0          | 0        |
| HSH2D     | 63.9379781 | 50.68772 |
| HSN2      | 0          | 0        |
| HSP90AA1  | 28.7459729 | 29.00921 |
| HSP90AA2  | 0          | 0        |
| HSP90AA3P | 0          | 0        |
| HSP90AA4P | 0          | 0        |
| HSP90AA5P | 0          | 0        |
| HSP90AA6P | 0          | 0        |
| HSP90AB1  | 20.4122992 | 21.08063 |
| HSP90AB2P | 0          | 0        |
| HSP90AB3P | 0          | 0        |
| HSP90AB4P | 0          | 0        |
| HSP90AB5P | 0          | 0        |
| HSP90AB6P | 0          | 0        |
| HSP90B1   | 28.5430212 | 22.86269 |
| HSP90B2P  | 0          | 0        |
| HSP90B3P  | 0          | 0        |
| HSPA12A   | 0.01837236 | 0.012523 |
| HSPA12B   | 0          | 0        |
| HSPA13    | 6.26488417 | 6.068627 |
| HSPA14    | 7.60218224 | 7.829449 |
| HSPA1A    | 52.3079765 | 50.35638 |
| HSPA1B    | 1.93566539 | 1.279559 |
| HSPA1L    | 3.62991524 | 2.664362 |
| HSPA2     | 0.01518074 | 0.068982 |
| HSPA4     | 12.776693  | 12.00253 |
| HSPA4L    | 0.04506348 | 0.036566 |
| HSPA5     | 43.7581415 | 41.75226 |
| HSPA6     | 26.154814  | 18.11197 |
| HSPA7     | 0          | 0        |
| HSPA8     | 35.5319724 | 28.6072  |

|          |            |          |
|----------|------------|----------|
| HSPA9    | 21.0843494 | 19.36789 |
| HSPA9P   | 0          | 0        |
| HSPAP1   | 0          | 0        |
| HSPB1    | 0.79694677 | 0.798833 |
| HSPB11   | 14.4833395 | 13.15469 |
| HSPB2    | 0          | 0        |
| HSPB3    | 0          | 0        |
| HSPB6    | 0.02886113 | 0.016393 |
| HSPB7    | 0.01454034 | 0        |
| HSPB8    | 0          | 0        |
| HSPB9    | 0.17521109 | 0.248803 |
| HSPBAP1  | 20.5040418 | 19.41899 |
| HSPBL2   | 0          | 0        |
| HSPBL3   | 0          | 0        |
| HSPBP1   | 0.46282175 | 0.450662 |
| HSPC072  | 0          | 0        |
| HSPC152  | 66.6102681 | 56.45571 |
| HSPC157  | 0          | 0        |
| HSPC159  | 1.53281091 | 1.110935 |
| HSPD1    | 3.3747555  | 3.255278 |
| HSPD1P1  | 0          | 0        |
| HSPD1P12 | 0          | 0        |
| HSPD1P2  | 0          | 0        |
| HSPD1P3  | 0          | 0        |
| HSPD1P4  | 0          | 0        |
| HSPD1P5  | 0          | 0        |
| HSPD1P6  | 0          | 0        |
| HSPD1P7  | 0          | 0        |
| HSPE1    | 1.21342414 | 0.902271 |
| HSPEP1   | 0          | 0        |
| HSPEP2   | 0          | 0        |
| HSPG2    | 0.00741059 | 0.016837 |
| HSPH1    | 4.01246774 | 3.913563 |
| HTA      | 0          | 0        |
| HTATIP2  | 10.249143  | 8.927514 |
| HTATSF1  | 9.54103456 | 9.133306 |
| HTN1     | 0          | 0        |
| HTN3     | 0          | 0        |
| HTR1A    | 0          | 0        |
| HTR1B    | 0          | 0.020362 |
| HTR1D    | 0.00741634 | 0.008425 |
| HTR1E    | 0.01026627 | 0        |
| HTR1F    | 0          | 0        |
| HTR2A    | 0          | 0        |
| HTR2B    | 0.00940731 | 0        |
| HTR2C    | 0.00442545 | 0        |
| HTR3A    | 0.00946661 | 0        |

|        |            |          |
|--------|------------|----------|
| HTR3B  | 0.01157145 | 0        |
| HTR3C  | 0          | 0.014058 |
| HTR3D  | 0.01191912 | 0        |
| HTR3E  | 0.02199302 | 0        |
| HTR4   | 0          | 0        |
| HTR5A  | 0          | 0        |
| HTR5B  | 0          | 0        |
| HTR6   | 0.02119489 | 0.012039 |
| HTR7   | 0.03136237 | 0.007126 |
| HTR7P  | 0          | 0        |
| HTRA1  | 0          | 0        |
| HTRA2  | 4.35348029 | 4.102619 |
| HTRA3  | 0          | 0.009415 |
| HTRA4  | 0.5879121  | 0.667877 |
| HTT    | 7.50358565 | 8.238812 |
| HULC   | 0          | 0        |
| HUNK   | 0.01138813 | 0.003234 |
| HUS1   | 4.48370334 | 4.079305 |
| HUS1B  | 0          | 0        |
| HUWE1  | 12.2978351 | 11.3768  |
| HVCN1  | 92.8482357 | 102.4748 |
| HYAL1  | 0.47490481 | 0.580371 |
| HYAL2  | 1.28687023 | 1.703724 |
| HYAL3  | 2.27359398 | 1.795688 |
| HYAL4  | 0.02620523 | 0.009923 |
| HYALP1 | 0          | 0        |
| HYDIN  | 0.00779727 | 0.004429 |
| HYI    | 1.80401205 | 2.073784 |
| HYLS1  | 0.2004003  | 0.142286 |
| HYMAI  | 0          | 0        |
| HYOU1  | 5.45810478 | 5.677311 |
| HYPK   | 6.49930542 | 7.294785 |
| IAH1   | 9.39874066 | 9.095323 |
| IAPP   | 0          | 0        |
| IARS   | 0.59271584 | 0.454109 |
| IARS2  | 8.59615532 | 7.436756 |
| IBSP   | 0          | 0        |
| IBTK   | 3.5278867  | 2.713183 |
| ICA1   | 0.00842361 | 0.038277 |
| ICA1L  | 0.05384208 | 0.036143 |
| ICAM1  | 3.30990269 | 5.526099 |
| ICAM2  | 15.5308584 | 13.81667 |
| ICAM3  | 279.825894 | 299.1006 |
| ICAM4  | 0.41458399 | 0.706461 |
| ICAM5  | 1.45678509 | 1.463977 |
| ICK    | 2.97954353 | 2.400764 |
| ICMT   | 2.03921694 | 2.068555 |

|         |            |          |
|---------|------------|----------|
| ICOS    | 0.01609287 | 0.009141 |
| ICOSLG  | 8.42571151 | 11.1572  |
| ICT1    | 3.58794044 | 3.070554 |
| ID1     | 0.08602836 | 0.234551 |
| ID2     | 81.0492597 | 238.711  |
| ID2B    | 0          | 0        |
| ID3     | 0.22853621 | 2.188232 |
| ID4     | 0.00896985 | 0.01019  |
| IDE     | 2.71185698 | 2.722787 |
| IDH1    | 5.53393211 | 4.768817 |
| IDH2    | 38.3624331 | 47.8667  |
| IDH3A   | 2.01180465 | 1.971754 |
| IDH3B   | 26.768899  | 26.61232 |
| IDH3G   | 35.1732172 | 29.77268 |
| IDI1    | 24.6164614 | 23.43803 |
| IDI2    | 0.37130827 | 0.456963 |
| IDO1    | 92.540881  | 37.60537 |
| IDO2    | 0.5224254  | 0.354008 |
| IDS     | 246.956711 | 273.3836 |
| IDSP1   | 0          | 0        |
| IDUA    | 2.22179847 | 2.381955 |
| IER2    | 79.3321634 | 148.8101 |
| IER3    | 13.1916996 | 32.03301 |
| IER3IP1 | 3.40721096 | 3.790007 |
| IER5    | 58.3089345 | 81.41538 |
| IER5L   | 0.10861795 | 0.449498 |
| IFFO1   | 21.1317345 | 23.66753 |
| IFFO2   | 0.07927288 | 0.081868 |
| IFI16   | 0.17687733 | 0.279562 |
| IFI27   | 0          | 0.036634 |
| IFI27L1 | 0.64693326 | 0.434275 |
| IFI27L2 | 4.63727856 | 3.835938 |
| IFI30   | 697.014169 | 814.5239 |
| IFI35   | 7.42677267 | 6.503468 |
| IFI44   | 5.21369736 | 4.732739 |
| IFI44L  | 1.79685328 | 1.85014  |
| IFI6    | 41.7328372 | 41.88226 |
| IFIH1   | 1.69013914 | 1.480165 |
| IFIT1   | 2.49682866 | 2.31022  |
| IFIT1L  | 0          | 0.036336 |
| IFIT1P  | 0          | 0        |
| IFIT2   | 18.2941435 | 17.07153 |
| IFIT3   | 13.7040104 | 12.24467 |
| IFIT5   | 3.71617773 | 3.398625 |
| IFITM1  | 142.98398  | 155.5697 |
| IFITM2  | 442.223194 | 480.6796 |
| IFITM3  | 26.501989  | 27.81829 |



|         |            |          |
|---------|------------|----------|
| IFITM4P | 0          | 0        |
| IFITM5  | 0.11473578 | 0        |
| IFITM8P | 0          | 0        |
| IFITM9P | 0          | 0        |
| IFLTD1  | 0          | 0        |
| IFNA1   | 0.02400152 | 0        |
| IFNA10  | 0          | 0        |
| IFNA13  | 0          | 0        |
| IFNA14  | 0          | 0        |
| IFNA16  | 0          | 0        |
| IFNA17  | 0          | 0        |
| IFNA2   | 0          | 0        |
| IFNA21  | 0          | 0        |
| IFNA4   | 0          | 0        |
| IFNA5   | 0          | 0        |
| IFNA6   | 0          | 0        |
| IFNA7   | 0.02852826 | 0        |
| IFNA8   | 0          | 0        |
| IFNAP22 | 0          | 0        |
| IFNAR1  | 8.03067604 | 7.234112 |
| IFNAR2  | 17.3303349 | 15.08693 |
| IFNB1   | 0          | 0.028435 |
| IFNE    | 0          | 0        |
| IFNG    | 0          | 0        |
| IFNGR1  | 233.430762 | 245.0815 |
| IFNGR2  | 36.0677672 | 44.23208 |
| IFNK    | 0          | 0        |
| IFNNP1  | 0          | 0        |
| IFNW1   | 0          | 0        |
| IFNWP12 | 0          | 0        |
| IFNWP18 | 0          | 0        |
| IFNWP19 | 0          | 0        |
| IFRD1   | 113.386606 | 101.5212 |
| IFRD2   | 0.50843617 | 0.385061 |
| IFRG15  | 0.05309427 | 0        |
| IFT122  | 2.90856293 | 3.138106 |
| IFT140  | 0.09977853 | 0.09068  |
| IFT172  | 0.67861609 | 0.619409 |
| IFT20   | 10.124107  | 9.416717 |
| IFT52   | 3.67786386 | 3.322526 |
| IFT57   | 1.56229434 | 1.014166 |
| IFT74   | 0.2501211  | 0.284142 |
| IFT80   | 0.86707446 | 0.578763 |
| IFT81   | 0.06212158 | 0.044909 |
| IFT88   | 0.6520514  | 0.657596 |
| IGBP1   | 15.5443145 | 16.13431 |
| IGDCC3  | 0.01877681 | 0.005333 |

|          |            |          |
|----------|------------|----------|
| IGDCC4   | 0.02593719 | 0.040514 |
| IGF1     | 0          | 0.006113 |
| IGF1R    | 8.9865429  | 7.799523 |
| IGF2     | 0.00333471 | 0        |
| IGF2AS   | 0          | 0        |
| IGF2BP1  | 0.00719307 | 0.002724 |
| IGF2BP2  | 0.84192962 | 0.83933  |
| IGF2BP3  | 0.00505538 | 0.011486 |
| IGF2R    | 25.606915  | 22.81053 |
| IGFALS   | 0.04090531 | 0.081321 |
| IGFBP1   | 0          | 0        |
| IGFBP2   | 0.01470303 | 0        |
| IGFBP3   | 0.00799138 | 0.018157 |
| IGFBP4   | 0.0188062  | 0.05341  |
| IGFBP5   | 0.00336998 | 0.003828 |
| IGFBP6   | 2.65537306 | 2.373675 |
| IGFBP7   | 13.9979456 | 13.62097 |
| IGFBPL1  | 0.0384727  | 0.087411 |
| IGFL1    | 0          | 0        |
| IGFL2    | 0.04403211 | 0.050021 |
| IGFL3    | 0          | 0        |
| IGFL4    | 0.40362764 | 0.29179  |
| IGFN1    | 0          | 0        |
| IGHA1    | 0          | 0        |
| IGHA2    | 0          | 0        |
| IGHD     | 0          | 0        |
| IGHD1-1  | 0          | 0        |
| IGHD1-14 | 0          | 0        |
| IGHD1-20 | 0          | 0        |
| IGHD1-26 | 0          | 0        |
| IGHD1-7  | 0          | 0        |
| IGHD2-15 | 0          | 0        |
| IGHD2-2  | 0          | 0        |
| IGHD2-21 | 0          | 0        |
| IGHD2-8  | 0          | 0        |
| IGHD3-10 | 0          | 0        |
| IGHD3-16 | 0          | 0        |
| IGHD3-22 | 0          | 0        |
| IGHD3-3  | 0          | 0        |
| IGHD3-9  | 0          | 0        |
| IGHD4-11 | 0          | 0        |
| IGHD4-17 | 0          | 0        |
| IGHD4-23 | 0          | 0        |
| IGHD4-4  | 0          | 0        |
| IGHD5-12 | 0          | 0        |
| IGHD5-18 | 0          | 0        |
| IGHD5-24 | 0          | 0        |

|             |            |          |
|-------------|------------|----------|
| IGHD5-5     | 0          | 0        |
| IGHD6-13    | 0          | 0        |
| IGHD6-19    | 0          | 0        |
| IGHD6-25    | 0          | 0        |
| IGHD6-6     | 0          | 0        |
| IGHD7-27    | 0          | 0        |
| IGHE        | 0          | 0        |
| IGHEP1      | 0          | 0        |
| IGHEP2      | 0          | 0        |
| IGHG1       | 0          | 0        |
| IGHG2       | 0          | 0        |
| IGHG3       | 0          | 0        |
| IGHG4       | 0          | 0        |
| IGHGP       | 0          | 0        |
| IGHJ1       | 0          | 0        |
| IGHJ1P      | 0          | 0        |
| IGHJ2       | 0          | 0        |
| IGHJ2P      | 0          | 0        |
| IGHJ3       | 0          | 0        |
| IGHJ3P      | 0          | 0        |
| IGHJ4       | 0          | 0        |
| IGHJ5       | 0          | 0        |
| IGHJ6       | 0          | 0        |
| IGHM        | 0          | 0        |
| IGHMBP2     | 5.47700832 | 5.056104 |
| IGHV1-12    | 0          | 0        |
| IGHV1-14    | 0          | 0        |
| IGHV1-17    | 0          | 0        |
| IGHV1-18    | 0          | 0        |
| IGHV1-2     | 0          | 0        |
| IGHV1-24    | 0          | 0        |
| IGHV1-3     | 0          | 0        |
| IGHV1-45    | 0          | 0        |
| IGHV1-46    | 0          | 0        |
| IGHV1-58    | 0          | 0        |
| IGHV1-67    | 0          | 0        |
| IGHV1-68    | 0          | 0        |
| IGHV1-69    | 0          | 0        |
| IGHV1-8     | 0          | 0        |
| IGHV1OR15-1 | 0          | 0        |
| IGHV1OR15-2 | 0          | 0        |
| IGHV1OR15-3 | 0          | 0        |
| IGHV1OR15-4 | 0          | 0        |
| IGHV1OR15-5 | 0          | 0        |
| IGHV1OR15-9 | 0          | 0        |
| IGHV2-10    | 0          | 0        |
| IGHV2-26    | 0          | 0        |

|             |   |   |
|-------------|---|---|
| IGHV2-5     | 0 | 0 |
| IGHV2-70    | 0 | 0 |
| IGHV2OR16-5 | 0 | 0 |
| IGHV3-11    | 0 | 0 |
| IGHV3-13    | 0 | 0 |
| IGHV3-15    | 0 | 0 |
| IGHV3-16    | 0 | 0 |
| IGHV3-19    | 0 | 0 |
| IGHV3-20    | 0 | 0 |
| IGHV3-21    | 0 | 0 |
| IGHV3-22    | 0 | 0 |
| IGHV3-23    | 0 | 0 |
| IGHV3-25    | 0 | 0 |
| IGHV3-29    | 0 | 0 |
| IGHV3-30    | 0 | 0 |
| IGHV3-30-2  | 0 | 0 |
| IGHV3-32    | 0 | 0 |
| IGHV3-33    | 0 | 0 |
| IGHV3-33-2  | 0 | 0 |
| IGHV3-35    | 0 | 0 |
| IGHV3-36    | 0 | 0 |
| IGHV3-37    | 0 | 0 |
| IGHV3-38    | 0 | 0 |
| IGHV3-41    | 0 | 0 |
| IGHV3-42    | 0 | 0 |
| IGHV3-43    | 0 | 0 |
| IGHV3-47    | 0 | 0 |
| IGHV3-48    | 0 | 0 |
| IGHV3-49    | 0 | 0 |
| IGHV3-50    | 0 | 0 |
| IGHV3-52    | 0 | 0 |
| IGHV3-53    | 0 | 0 |
| IGHV3-54    | 0 | 0 |
| IGHV3-57    | 0 | 0 |
| IGHV3-6     | 0 | 0 |
| IGHV3-60    | 0 | 0 |
| IGHV3-62    | 0 | 0 |
| IGHV3-63    | 0 | 0 |
| IGHV3-64    | 0 | 0 |
| IGHV3-65    | 0 | 0 |
| IGHV3-66    | 0 | 0 |
| IGHV3-7     | 0 | 0 |
| IGHV3-71    | 0 | 0 |
| IGHV3-72    | 0 | 0 |
| IGHV3-73    | 0 | 0 |
| IGHV3-74    | 0 | 0 |
| IGHV3-75    | 0 | 0 |

|              |   |   |
|--------------|---|---|
| IGHV3-76     | 0 | 0 |
| IGHV3-79     | 0 | 0 |
| IGHV3-9      | 0 | 0 |
| IGHV3OR16-6  | 0 | 0 |
| IGHV3OR16-8  | 0 | 0 |
| IGHV4-28     | 0 | 0 |
| IGHV4-31     | 0 | 0 |
| IGHV4-34     | 0 | 0 |
| IGHV4-39     | 0 | 0 |
| IGHV4-4      | 0 | 0 |
| IGHV4-55     | 0 | 0 |
| IGHV4-59     | 0 | 0 |
| IGHV4-61     | 0 | 0 |
| IGHV4-80     | 0 | 0 |
| IGHV5-51     | 0 | 0 |
| IGHV5-78     | 0 | 0 |
| IGHV6-1      | 0 | 0 |
| IGHV7-27     | 0 | 0 |
| IGHV7-34-1   | 0 | 0 |
| IGHV7-40     | 0 | 0 |
| IGHV7-56     | 0 | 0 |
| IGHV7-81     | 0 | 0 |
| IGHVII-1-1   | 0 | 0 |
| IGHVII-15-1  | 0 | 0 |
| IGHVII-20-1  | 0 | 0 |
| IGHVII-22-1  | 0 | 0 |
| IGHVII-26-2  | 0 | 0 |
| IGHVII-28-1  | 0 | 0 |
| IGHVII-30-1  | 0 | 0 |
| IGHVII-31-1  | 0 | 0 |
| IGHVII-33-1  | 0 | 0 |
| IGHVII-40-1  | 0 | 0 |
| IGHVII-43-1  | 0 | 0 |
| IGHVII-44-2  | 0 | 0 |
| IGHVII-46-1  | 0 | 0 |
| IGHVII-49-1  | 0 | 0 |
| IGHVII-51-2  | 0 | 0 |
| IGHVII-53-1  | 0 | 0 |
| IGHVII-60-1  | 0 | 0 |
| IGHVII-62-1  | 0 | 0 |
| IGHVII-65-1  | 0 | 0 |
| IGHVII-67-1  | 0 | 0 |
| IGHVII-74-1  | 0 | 0 |
| IGHVII-78-1  | 0 | 0 |
| IGHVIII-11-1 | 0 | 0 |
| IGHVIII-13-1 | 0 | 0 |
| IGHVIII-16-1 | 0 | 0 |

|                |            |          |
|----------------|------------|----------|
| IGHVIII-2-1    | 0          | 0        |
| IGHVIII-22-2   | 0          | 0        |
| IGHVIII-25-1   | 0          | 0        |
| IGHVIII-26-1   | 0          | 0        |
| IGHVIII-38-1   | 0          | 0        |
| IGHVIII-44     | 0          | 0        |
| IGHVIII-47-1   | 0          | 0        |
| IGHVIII-5-1    | 0          | 0        |
| IGHVIII-51-1   | 0          | 0        |
| IGHVIII-5-2    | 0          | 0        |
| IGHVIII-67-2   | 0          | 0        |
| IGHVIII-67-3   | 0          | 0        |
| IGHVIII-67-4   | 0          | 0        |
| IGHVIII-76-1   | 0          | 0        |
| IGHVIII-82     | 0          | 0        |
| IGHVIV-44-1    | 0          | 0        |
| IGJ            | 0.10445516 | 0.271229 |
| IGJP1          | 0          | 0        |
| IGK@ (NC_00000 | 0          | 0        |
| IGK@ (NC_00000 | 0          | 0        |
| IGKC           | 0          | 0        |
| IGKJ1          | 0          | 0        |
| IGKJ2          | 0          | 0        |
| IGKJ3          | 0          | 0        |
| IGKJ4          | 0          | 0        |
| IGKJ5          | 0          | 0        |
| IGKV1-12       | 0          | 0        |
| IGKV1-13       | 0          | 0        |
| IGKV1-16       | 0          | 0        |
| IGKV1-17       | 0          | 0        |
| IGKV1-22       | 0          | 0        |
| IGKV1-27       | 0          | 0        |
| IGKV1-32       | 0          | 0        |
| IGKV1-33       | 0          | 0        |
| IGKV1-35       | 0          | 0        |
| IGKV1-37       | 0          | 0        |
| IGKV1-39       | 0          | 0        |
| IGKV1-5        | 0          | 0        |
| IGKV1-6        | 0          | 0        |
| IGKV1-8        | 0          | 0        |
| IGKV1-9        | 0          | 0        |
| IGKV1D-12      | 0          | 0        |
| IGKV1D-13      | 0          | 0        |
| IGKV1D-16      | 0          | 0        |
| IGKV1D-17      | 0          | 0        |
| IGKV1D-22      | 0          | 0        |
| IGKV1D-27      | 0          | 0        |

|               |   |   |
|---------------|---|---|
| IGKV1D-32     | 0 | 0 |
| IGKV1D-33     | 0 | 0 |
| IGKV1D-35     | 0 | 0 |
| IGKV1D-37     | 0 | 0 |
| IGKV1D-39     | 0 | 0 |
| IGKV1D-42     | 0 | 0 |
| IGKV1D-43     | 0 | 0 |
| IGKV1D-8      | 0 | 0 |
| IGKV1OR15-118 | 0 | 0 |
| IGKV2-10      | 0 | 0 |
| IGKV2-14      | 0 | 0 |
| IGKV2-18      | 0 | 0 |
| IGKV2-19      | 0 | 0 |
| IGKV2-23      | 0 | 0 |
| IGKV2-24      | 0 | 0 |
| IGKV2-26      | 0 | 0 |
| IGKV2-28      | 0 | 0 |
| IGKV2-29      | 0 | 0 |
| IGKV2-30      | 0 | 0 |
| IGKV2-36      | 0 | 0 |
| IGKV2-38      | 0 | 0 |
| IGKV2-4       | 0 | 0 |
| IGKV2-40      | 0 | 0 |
| IGKV2D-10     | 0 | 0 |
| IGKV2D-14     | 0 | 0 |
| IGKV2D-18     | 0 | 0 |
| IGKV2D-19     | 0 | 0 |
| IGKV2D-23     | 0 | 0 |
| IGKV2D-24     | 0 | 0 |
| IGKV2D-26     | 0 | 0 |
| IGKV2D-28     | 0 | 0 |
| IGKV2D-29     | 0 | 0 |
| IGKV2D-30     | 0 | 0 |
| IGKV2D-36     | 0 | 0 |
| IGKV2D-38     | 0 | 0 |
| IGKV2D-40     | 0 | 0 |
| IGKV2OR2-7    | 0 | 0 |
| IGKV3-11      | 0 | 0 |
| IGKV3-15      | 0 | 0 |
| IGKV3-20      | 0 | 0 |
| IGKV3-25      | 0 | 0 |
| IGKV3-31      | 0 | 0 |
| IGKV3-34      | 0 | 0 |
| IGKV3-7       | 0 | 0 |
| IGKV3D-11     | 0 | 0 |
| IGKV3D-15     | 0 | 0 |
| IGKV3D-20     | 0 | 0 |

|           |            |          |
|-----------|------------|----------|
| IGKV3D-25 | 0          | 0        |
| IGKV3D-31 | 0          | 0        |
| IGKV3D-34 | 0          | 0        |
| IGKV3D-7  | 0          | 0        |
| IGKV4-1   | 0          | 0        |
| IGKV5-2   | 0          | 0        |
| IGKV6-21  | 0          | 0        |
| IGKV6D-21 | 0          | 0        |
| IGKV6D-41 | 0          | 0        |
| IGKV7-3   | 0          | 0        |
| IGL@      | 0          | 0        |
| IGLC1     | 0          | 0        |
| IGLC2     | 0          | 0        |
| IGLC3     | 0          | 0        |
| IGLC4     | 0          | 0        |
| IGLC5     | 0          | 0        |
| IGLC6     | 0          | 0        |
| IGLC7     | 0          | 0        |
| IGLJ1     | 0          | 0        |
| IGLJ2     | 0          | 0        |
| IGLJ3     | 0          | 0        |
| IGLJ4     | 0          | 0        |
| IGLJ5     | 0          | 0        |
| IGLJ6     | 0          | 0        |
| IGLJ7     | 0          | 0        |
| IGLJCOR18 | 0          | 0        |
| IGLL1     | 0.1400133  | 0        |
| IGLL3     | 1.58725146 | 1.385023 |
| IGLON5    | 0.04747655 | 0.046229 |
| IGLV10-54 | 0          | 0        |
| IGLV10-67 | 0          | 0        |
| IGLV11-55 | 0          | 0        |
| IGLV1-36  | 0          | 0        |
| IGLV1-40  | 0          | 0        |
| IGLV1-41  | 0          | 0        |
| IGLV1-44  | 0          | 0        |
| IGLV1-47  | 0          | 0        |
| IGLV1-50  | 0          | 0        |
| IGLV1-51  | 0          | 0        |
| IGLV1-62  | 0          | 0        |
| IGLV2-11  | 0          | 0        |
| IGLV2-14  | 0          | 0        |
| IGLV2-18  | 0          | 0        |
| IGLV2-23  | 0          | 0        |
| IGLV2-28  | 0          | 0        |
| IGLV2-33  | 0          | 0        |
| IGLV2-34  | 0          | 0        |



|           |   |   |
|-----------|---|---|
| IGLV2-5   | 0 | 0 |
| IGLV2-8   | 0 | 0 |
| IGLV3-1   | 0 | 0 |
| IGLV3-10  | 0 | 0 |
| IGLV3-12  | 0 | 0 |
| IGLV3-13  | 0 | 0 |
| IGLV3-15  | 0 | 0 |
| IGLV3-16  | 0 | 0 |
| IGLV3-17  | 0 | 0 |
| IGLV3-19  | 0 | 0 |
| IGLV3-2   | 0 | 0 |
| IGLV3-21  | 0 | 0 |
| IGLV3-22  | 0 | 0 |
| IGLV3-24  | 0 | 0 |
| IGLV3-25  | 0 | 0 |
| IGLV3-26  | 0 | 0 |
| IGLV3-27  | 0 | 0 |
| IGLV3-29  | 0 | 0 |
| IGLV3-30  | 0 | 0 |
| IGLV3-31  | 0 | 0 |
| IGLV3-32  | 0 | 0 |
| IGLV3-4   | 0 | 0 |
| IGLV3-6   | 0 | 0 |
| IGLV3-7   | 0 | 0 |
| IGLV3-9   | 0 | 0 |
| IGLV4-3   | 0 | 0 |
| IGLV4-60  | 0 | 0 |
| IGLV4-69  | 0 | 0 |
| IGLV5-37  | 0 | 0 |
| IGLV5-45  | 0 | 0 |
| IGLV5-48  | 0 | 0 |
| IGLV5-52  | 0 | 0 |
| IGLV6-57  | 0 | 0 |
| IGLV7-35  | 0 | 0 |
| IGLV7-43  | 0 | 0 |
| IGLV7-46  | 0 | 0 |
| IGLV8-61  | 0 | 0 |
| IGLV9-49  | 0 | 0 |
| IGLVI-20  | 0 | 0 |
| IGLVI-38  | 0 | 0 |
| IGLVI-42  | 0 | 0 |
| IGLVI-56  | 0 | 0 |
| IGLVI-63  | 0 | 0 |
| IGLVI-68  | 0 | 0 |
| IGLVI-70  | 0 | 0 |
| IGLVIV-53 | 0 | 0 |
| IGLVIV-59 | 0 | 0 |

|                 |            |          |
|-----------------|------------|----------|
| IGLVIV-64       | 0          | 0        |
| IGLVIV-65       | 0          | 0        |
| IGLVIV-66-1     | 0          | 0        |
| IGLVV-58        | 0          | 0        |
| IGLVV-66        | 0          | 0        |
| IGLVVI-22-1     | 0          | 0        |
| IGLVVI-25-1     | 0          | 0        |
| IGLVVII-41-1    | 0          | 0        |
| IGSF1           | 0          | 0        |
| IGSF10          | 0.03739261 | 0.009103 |
| IGSF11          | 0.01088549 | 0        |
| IGSF2           | 130.781471 | 193.6061 |
| IGSF21          | 0.01082107 | 0        |
| IGSF22          | 0.01600101 | 0.012118 |
| IGSF3           | 0.00579769 | 0.006586 |
| IGSF5           | 0          | 0.011561 |
| IGSF6           | 0.12271594 | 0.023235 |
| IGSF8           | 1.28632086 | 1.072307 |
| IGSF9           | 0.01039828 | 0        |
| IGSF9B          | 0.04602617 | 0.058822 |
| IHH             | 0          | 0        |
| IK              | 61.793828  | 61.02738 |
| IKBKAP          | 6.36193364 | 5.906818 |
| IKBKB           | 24.9071783 | 22.43956 |
| IKBKE           | 0.09020982 | 0.1098   |
| IKBKG           | 28.920494  | 27.10092 |
| IKBKGP          | 0          | 0        |
| IKIP            | 2.09762955 | 2.079657 |
| IKZF1 (NC_0000C | 49.1030457 | 34.44248 |
| IKZF1 (NC_0000C | 43.7938244 | 29.76896 |
| IKZF2           | 8.22512688 | 4.992136 |
| IKZF3           | 2.02747344 | 1.99941  |
| IKZF4           | 0.46285814 | 0.547723 |
| IKZF5           | 16.1177296 | 14.6941  |
| IL10            | 0.01290689 | 0        |
| IL10RA          | 28.7775591 | 20.12203 |
| IL10RB          | 70.6059951 | 73.43282 |
| IL11            | 0.00893175 | 0.010147 |
| IL11RA          | 4.42471807 | 4.018841 |
| IL12A           | 0.19020828 | 0.083108 |
| IL12B           | 0          | 0        |
| IL12RB1         | 2.8551111  | 2.827624 |
| IL12RB2         | 0.05724719 | 0.059122 |
| IL13            | 0.04920124 | 0.018631 |
| IL13RA1         | 67.4322147 | 90.65132 |
| IL13RA2         | 0          | 0        |
| IL15            | 0          | 0.024561 |

|              |            |                 |
|--------------|------------|-----------------|
| IL15RA       | 1.25337293 | 1.827276        |
| IL16         | 74.9288987 | 75.18715        |
| IL17A        | 0          | 0               |
| IL17B        | 0.09075682 | 0.206202        |
| IL17C        | 0          | 0.045713        |
| IL17D        | 0          | 0.012835        |
| IL17F        | 0          | 0               |
| IL17RA       | 26.3659735 | 27.70227        |
| IL17RB       | 1.05126655 | 1.077172        |
| IL17RC       | 0.00793708 | 0.02705         |
| IL17RD       | 0.00723349 | 0.002739        |
| IL17RE       | 0.01513703 | 0.025794        |
| IL17REL      | 0          | 0.006571        |
| IL18         | 4.86612463 | 3.921747        |
| IL18BP       | 17.2938415 | 15.00931        |
| IL18R1       | 47.4592224 | 33.93557        |
| IL18RAP      | 8.10121448 | 3.607833        |
| IL19         | 0.0106836  | 0               |
| IL1A         | 0.5313779  | 0.505764        |
| IL1B         | 2.54044386 | 1.897415        |
| IL1F10       | 0          | 0               |
| IL1F5        | 0          | 0.008524        |
| IL1F6        | 0          | 0               |
| IL1F7        | 0          | 0               |
| IL1F8        | 0          | 0.013735        |
| IL1F9        | 0          | 0               |
| IL1R1        | 0.09854954 | 0.058411        |
| IL1R2        | 0.06666243 | 0               |
| IL1RAP       | 26.9824445 | 35.86449        |
| IL1RAPL1     | 0          | 0               |
| IL1RAPL2     | 0.00704366 | 0               |
| IL1RL1       | 79.2704384 | 48.73338        |
| IL1RL2       | 0.01070536 | 0               |
| IL1RN        | 0.01990093 | 0.022608        |
| IL2          | 0          | 0               |
| IL20         | 0          | 0               |
| IL20RA       | 0.0114206  | 0.006487        |
| IL20RB       | 0.79360318 | 0.632253        |
| IL21         | 0          | 0               |
| IL21R        | 0.13492818 | 0.173274        |
| IL22         | 0          | 0               |
| IL22RA1      | 0.01502883 | 0               |
| IL22RA2      | 0.00725762 | 0.008245        |
| IL23A        | 0.24213433 | 0.229224        |
| <u>IL23R</u> | <u>0</u>   | <u>0.016904</u> |
| IL24         | 0.01064574 | 0.048375        |
| IL25         | 0          | 0               |

|                 |            |          |
|-----------------|------------|----------|
| IL26            | 0          | 0.022813 |
| IL27            | 0.70487221 | 0.503326 |
| IL27RA          | 0.793774   | 1.862129 |
| IL28A           | 0          | 0        |
| IL28B           | 0          | 0        |
| IL28RA          | 0.02310984 | 0.021003 |
| IL29            | 0.0245623  | 0        |
| IL2RA           | 11.8073736 | 16.98681 |
| IL2RB           | 0.45221355 | 0.472388 |
| IL2RG           | 21.7643329 | 15.27593 |
| IL3             | 0.04550937 | 0        |
| IL31            | 0          | 0        |
| IL31RA          | 0.01757236 | 0        |
| IL32            | 13.5704148 | 9.209682 |
| IL33            | 0          | 0        |
| IL34            | 3.20747577 | 1.784691 |
| IL3RA (NC_00002 | 34.8331945 | 32.05633 |
| IL3RA (NC_00002 | 40.4030629 | 36.58193 |
| IL4             | 0.04565761 | 0.103736 |
| IL4I1           | 0.18351286 | 0.238255 |
| IL4R            | 54.3816755 | 66.20047 |
| IL5             | 0          | 0        |
| IL5RA           | 13.6199106 | 6.321805 |
| IL6             | 0.01859004 | 0.063356 |
| IL6R            | 36.4418931 | 46.83792 |
| IL6RL1          | 0          | 0        |
| IL6ST           | 0.14329532 | 0.11099  |
| IL6STP          | 0          | 0        |
| IL7             | 0.01011806 | 0        |
| IL7R            | 0.68725459 | 0.516077 |
| IL8             | 1.37370583 | 0.606881 |
| IL8RA           | 0.01691499 | 0.028824 |
| IL8RB           | 9.14848259 | 7.385252 |
| IL8RBP          | 0          | 0        |
| IL9             | 0          | 0        |
| IL9R (NC_000023 | 22.6464201 | 18.60443 |
| IL9R (NC_000024 | 22.3436866 | 16.59643 |
| IL9RP2          | 0          | 0        |
| IL9RP3          | 0          | 0        |
| IL9RP4          | 0          | 0        |
| ILD1R           | 0.00790723 | 0.017965 |
| ILD2R           | 0.0081747  | 0        |
| ILF2            | 28.6163624 | 25.21865 |
| ILF3            | 33.3231661 | 31.05096 |
| ILK             | 75.4685456 | 77.215   |
| ILKAP           | 35.1733534 | 42.39069 |
| ILVBL           | 1.21687076 | 0.883479 |

|           |            |          |
|-----------|------------|----------|
| IMAA      | 0          | 0        |
| IMMP1L    | 1.71905222 | 1.862738 |
| IMMP2L    | 0.05536624 | 0.141518 |
| IMMT      | 11.0836633 | 8.71516  |
| IMMTP     | 0          | 0        |
| IMP3      | 12.6333239 | 10.72771 |
| IMP4      | 4.32933412 | 3.142178 |
| IMP5      | 0          | 0        |
| IMPA1     | 6.95583649 | 6.600444 |
| IMPA1P    | 0          | 0        |
| IMPA2     | 39.5696729 | 45.87533 |
| IMPACT    | 6.04639073 | 3.876009 |
| IMPAD1    | 6.08329418 | 6.481071 |
| IMPDH1    | 23.0970577 | 21.9778  |
| IMPDH1P1  | 0          | 0        |
| IMPDH1P11 | 0          | 0        |
| IMPDH1P2  | 0          | 0        |
| IMPDH1P3  | 0          | 0        |
| IMPDH1P4  | 0          | 0        |
| IMPDH1P5  | 0          | 0        |
| IMPDH1P6  | 0          | 0        |
| IMPDH1P7  | 0          | 0        |
| IMPDH1P8  | 0          | 0        |
| IMPDH1P9  | 0          | 0        |
| IMPDH2    | 4.39113107 | 3.677884 |
| IMPG1     | 0.0064337  | 0        |
| IMPG2     | 0.0283233  | 0.02145  |
| INA       | 0          | 0        |
| INADL     | 5.18896763 | 4.847231 |
| INCA1     | 0.28885126 | 0.069082 |
| INCENP    | 4.89881083 | 4.418688 |
| INE1      | 0          | 0        |
| INE2      | 0          | 0        |
| INF2      | 0.08035158 | 0.040569 |
| ING1      | 5.62483903 | 4.59329  |
| ING2      | 15.42988   | 12.3278  |
| ING3      | 7.47181183 | 5.779802 |
| ING4      | 25.5556509 | 21.88919 |
| ING5      | 4.5060059  | 4.834001 |
| INGX      | 0          | 0        |
| INHA      | 0.01477536 | 0        |
| INHBA     | 0.03866728 | 0.021963 |
| INHBB     | 0.31508457 | 0.544369 |
| INHBC     | 0.01056549 | 0.012003 |
| INHBE     | 0.01725509 | 0.068607 |
| INMT      | 0          | 0.009334 |
| INO80     | 7.64434708 | 7.387622 |

|                |            |          |
|----------------|------------|----------|
| INO80B         | 10.252451  | 9.538278 |
| INO80C         | 11.1890318 | 10.60341 |
| INO80D         | 4.31185869 | 3.845678 |
| INO80E         | 19.9075286 | 18.38246 |
| INPP1          | 24.2330791 | 15.68047 |
| INPP4A         | 59.518692  | 52.30286 |
| INPP4B         | 0          | 0.005792 |
| INPP5A         | 25.8558614 | 25.66552 |
| INPP5B         | 32.5434737 | 23.75104 |
| INPP5D (NC_000 | 116.234377 | 125.425  |
| INPP5D (NC_000 | 178.482859 | 197.8102 |
| INPP5E         | 1.32031107 | 0.799472 |
| INPP5F         | 5.64853275 | 6.121407 |
| INPP5J         | 0          | 0.021374 |
| INPP5K         | 19.4166313 | 18.70009 |
| INPPL1         | 66.9842623 | 69.29112 |
| INS            | 0          | 0        |
| INSC           | 0.06265827 | 0.023727 |
| INSIG1         | 9.8938644  | 11.13691 |
| INSIG2         | 10.0609017 | 10.7728  |
| INS-IGF2       | 0          | 0.028847 |
| INSL3          | 0          | 0        |
| INSL4          | 0          | 0.038838 |
| INSL5          | 0          | 0        |
| INSL6          | 0          | 0        |
| INSM1          | 0.01486414 | 0.008443 |
| INSM2          | 0          | 0        |
| INSR           | 1.7221322  | 1.439593 |
| INSRR          | 0          | 0        |
| INTS1          | 16.7714247 | 16.48394 |
| INTS10         | 6.03328378 | 5.234577 |
| INTS12         | 6.65662218 | 6.240377 |
| INTS2          | 0.96885984 | 0.767605 |
| INTS3          | 10.6487062 | 9.118122 |
| INTS4          | 12.7060034 | 11.15751 |
| INTS4L1        | 0          | 0        |
| INTS4L2        | 0          | 0        |
| INTS5          | 5.76036465 | 5.278718 |
| INTS6          | 4.05518542 | 4.309716 |
| INTS7          | 2.12561116 | 1.407441 |
| INTS8          | 9.41246657 | 8.030155 |
| INTS9          | 2.93943417 | 2.725031 |
| INTU           | 0          | 0        |
| INVS           | 0.69903807 | 0.621752 |
| IP6K1          | 29.4298164 | 27.94258 |
| IP6K2          | 21.025331  | 18.99009 |
| IP6K3          | 0.01489574 | 0.008461 |

|          |            |          |
|----------|------------|----------|
| IPCEF1   | 6.78265746 | 3.260027 |
| IPMK     | 11.8436053 | 10.64373 |
| IPO11    | 0.52642745 | 0.41759  |
| IPO13    | 2.86150483 | 2.386517 |
| IPO4     | 3.59766774 | 3.688922 |
| IPO5     | 1.59388963 | 1.436609 |
| IPO7     | 4.06788542 | 4.929775 |
| IPO8     | 12.1886568 | 11.23378 |
| IPO9     | 3.18621431 | 2.845458 |
| IPP      | 0.74721633 | 0.745331 |
| IPPK     | 3.73592566 | 3.76105  |
| IPW      | 0          | 0        |
| IQCA1    | 0          | 0        |
| IQCA1L   | 0          | 0        |
| IQCB1    | 5.80344525 | 5.856179 |
| IQCC     | 1.02155797 | 0.93551  |
| IQCD     | 0.21804047 | 0.159234 |
| IQCE     | 1.63127568 | 1.769397 |
| IQCF1    | 0          | 0        |
| IQCF2    | 0          | 0        |
| IQCF3    | 0          | 0        |
| IQCF5    | 0          | 0        |
| IQCF6    | 0          | 0        |
| IQCG     | 0.91453465 | 0.590762 |
| IQCH     | 0.03429108 | 0.027825 |
| IQCJ     | 0          | 0        |
| IQCK     | 0.00823231 | 0.009352 |
| IQGAP1   | 53.0794832 | 48.13462 |
| IQGAP2   | 9.43570495 | 7.804374 |
| IQGAP3   | 0.01389645 | 0.007893 |
| IQSEC1   | 36.7986578 | 35.07695 |
| IQSEC2   | 13.0927093 | 14.01418 |
| IQSEC3   | 0          | 0        |
| IQUB     | 0.0067497  | 0        |
| IQWD1    | 7.43835729 | 6.382902 |
| IRAK1    | 53.6260752 | 90.65105 |
| IRAK1BP1 | 0          | 0        |
| IRAK2    | 7.06703255 | 11.7119  |
| IRAK3    | 2.89526669 | 3.38067  |
| IRAK4    | 23.6504702 | 20.91942 |
| IREB2    | 12.2017587 | 11.23167 |
| IRF1     | 53.2318312 | 67.59607 |
| IRF2     | 33.2671138 | 34.53206 |
| IRF2BP1  | 9.33621825 | 9.074629 |
| IRF2BP2  | 112.097524 | 88.77905 |
| IRF3     | 31.8573521 | 30.10442 |
| IRF4     | 0.19782961 | 0.206759 |

|         |            |          |
|---------|------------|----------|
| IRF5    | 4.66392521 | 8.091373 |
| IRF6    | 0.49414372 | 0.61639  |
| IRF7    | 34.3702206 | 46.10563 |
| IRF8    | 0.40281438 | 0.58322  |
| IRF9    | 69.2156902 | 66.47405 |
| IRG1    | 0.01305111 | 0        |
| IRGC    | 0.02611842 | 0.044506 |
| IRGM    | 0.31683742 | 0.201562 |
| IRGQ    | 1.87311455 | 1.7605   |
| IRS1    | 0.00722024 | 0.019139 |
| IRS2    | 36.8348896 | 45.55851 |
| IRS3L   | 0          | 0        |
| IRS4    | 0          | 0        |
| IRX1    | 0.02263222 | 0.012855 |
| IRX1P1  | 0          | 0        |
| IRX2    | 0.00687777 | 0        |
| IRX3    | 0          | 0.010349 |
| IRX4    | 0.03786642 | 0.010754 |
| IRX5    | 0.04074677 | 0.092578 |
| IRX6    | 0          | 0.010256 |
| ISCA1   | 15.4647394 | 13.28937 |
| ISCA1L  | 0.01117774 | 0.012698 |
| ISCA2   | 6.57908565 | 6.753565 |
| ISCU    | 56.2288689 | 55.50794 |
| ISG15   | 32.0896356 | 40.85894 |
| ISG20   | 1.58349773 | 1.199252 |
| ISG20L2 | 17.457893  | 18.50485 |
| ISL1    | 0          | 0        |
| ISL2    | 0.09354986 | 0.013284 |
| ISLR    | 0.0176313  | 0        |
| ISLR2   | 0.00419416 | 0        |
| ISM1    | 0          | 0        |
| ISM2    | 0.00702953 | 0.007986 |
| ISOC1   | 2.08954113 | 1.832586 |
| ISOC2   | 0.93445915 | 0.571609 |
| ISX     | 0          | 0.00706  |
| ISY1    | 23.4053315 | 22.40418 |
| ISYNA1  | 1.64746429 | 2.395055 |
| ITCH    | 27.5613446 | 26.35637 |
| ITFG1   | 3.95283751 | 4.062821 |
| ITFG2   | 5.1221804  | 4.233927 |
| ITFG3   | 9.16653149 | 9.134922 |
| ITGA1   | 0.24111618 | 0.169327 |
| ITGA10  | 0.07320231 | 0.097019 |
| ITGA11  | 0.00839502 | 0.014305 |
| ITGA2   | 0.02137535 | 0.036424 |
| ITGA2B  | 2.25136267 | 2.034604 |



|          |            |          |
|----------|------------|----------|
| ITGA3    | 0.01254744 | 0.009503 |
| ITGA4    | 35.7693357 | 27.96152 |
| ITGA5    | 8.51402226 | 16.97248 |
| ITGA6    | 7.30277416 | 6.215884 |
| ITGA7    | 0.12858073 | 0.20558  |
| ITGA8    | 0          | 0        |
| ITGA9    | 0.04245397 | 0.030143 |
| ITGAD    | 0.13973891 | 0.201485 |
| ITGAE    | 4.48714652 | 4.30563  |
| ITGAL    | 62.4342137 | 50.85158 |
| ITGAM    | 87.1872855 | 87.06329 |
| ITGAV    | 2.45572599 | 3.230404 |
| ITGAX    | 203.745361 | 193.7576 |
| ITGB1    | 7.3108993  | 7.714981 |
| ITGB1BP1 | 5.58859833 | 4.220115 |
| ITGB1BP2 | 0.20429471 | 0.251422 |
| ITGB1BP3 | 0.01867259 | 0.042425 |
| ITGB2    | 464.028987 | 458.7035 |
| ITGB3    | 0.00859229 | 0.019522 |
| ITGB3BP  | 0.33487444 | 0.35325  |
| ITGB4    | 0.11761455 | 0.16505  |
| ITGB5    | 0.03741162 | 0.007083 |
| ITGB6    | 0.01754304 | 0        |
| ITGB7    | 122.214004 | 121.727  |
| ITGB8    | 0.02155953 | 0.016328 |
| ITGBL1   | 0          | 0        |
| ITIH1    | 0.0072252  | 0.008208 |
| ITIH2    | 0.25713011 | 0.262145 |
| ITIH3    | 0.1523073  | 0.228076 |
| ITIH4    | 7.52655253 | 7.590483 |
| ITIH5    | 0.00284742 | 0.006469 |
| ITIH5L   | 0          | 0        |
| ITK      | 0.09149823 | 0.120356 |
| ITLN1    | 0.03557586 | 0        |
| ITLN2    | 0.16454607 | 0.041539 |
| ITM2A    | 12.3604156 | 16.23197 |
| ITM2B    | 431.839894 | 406.8405 |
| ITM2C    | 75.0035323 | 72.27752 |
| ITPA     | 5.0834578  | 3.715461 |
| ITPK1    | 35.2685692 | 44.36833 |
| ITPKA    | 0.01185862 | 0.026943 |
| ITPKB    | 66.9623694 | 67.03103 |
| ITPKC    | 2.2484992  | 1.644086 |
| ITPR1    | 10.9349637 | 8.518974 |
| ITPR2    | 6.86568732 | 6.682053 |
| ITPR3    | 0.2934092  | 0.34919  |
| ITPRIP   | 31.6488082 | 32.39596 |

|               |            |          |
|---------------|------------|----------|
| ITPRIPL1      | 0.00883417 | 0.040143 |
| ITPRIPL2      | 0.03837239 | 0.040478 |
| ITSN1         | 2.0493814  | 1.366837 |
| ITSN2         | 30.7828569 | 30.50686 |
| IVD           | 1.86912915 | 1.498209 |
| IVL           | 0.01969586 | 0        |
| IVNS1ABP      | 85.0476891 | 89.35727 |
| IWS1          | 17.107611  | 15.26258 |
| IYD           | 0.00568175 | 0        |
| IZUMO1        | 0          | 0        |
| JAG1          | 6.56361175 | 7.077365 |
| JAG2          | 0.06626065 | 0.221115 |
| JAGN1         | 4.31905895 | 3.741041 |
| JAK1          | 101.76876  | 102.8483 |
| JAK2          | 15.2488351 | 13.01592 |
| JAK3          | 0.16244737 | 0.232875 |
| JAKMIP1       | 0.00635975 | 0.007225 |
| JAKMIP2       | 0.03779269 | 0.014311 |
| JAKMIP3       | 0.59716916 | 0.499373 |
| JAM2          | 0.01241898 | 0        |
| JAM3          | 0.21799797 | 0.247649 |
| JARID2        | 18.9469061 | 15.91787 |
| JAZF1         | 20.8939226 | 25.29582 |
| JDP2          | 47.732519  | 73.92425 |
| JHDM1D        | 6.36166312 | 9.899647 |
| JMJD1C        | 19.2105034 | 16.25974 |
| JMJD4         | 1.0059178  | 0.946038 |
| JMJD5         | 0.60589464 | 0.607855 |
| JMJD6         | 20.7787966 | 29.58677 |
| JMJD7         | 2.01086147 | 2.066012 |
| JMJD7-PLA2G4B | 8.04919858 | 7.625926 |
| JMJD8         | 1.72980196 | 1.614175 |
| JMY           | 1.82336625 | 1.829844 |
| JOSD1         | 60.4929682 | 78.67832 |
| JOSD2         | 5.52290878 | 4.565814 |
| JPH1          | 0          | 0        |
| JPH2          | 0          | 0.016082 |
| JPH3          | 0.01052056 | 0.011952 |
| JPH4          | 0.01917495 | 0.021783 |
| JRK           | 2.34511533 | 2.00658  |
| JRKL          | 0.85397003 | 0.682432 |
| JSRP1         | 0.01906195 | 0.021655 |
| JTB           | 60.578066  | 55.23621 |
| JTV1          | 0.91414482 | 0.48985  |
| JUB           | 0.05757938 | 0.075474 |
| JUN           | 3.08135305 | 6.361216 |
| JUNB          | 147.142583 | 197.473  |

|         |            |          |
|---------|------------|----------|
| JUND    | 54.0362249 | 73.5457  |
| JUP     | 6.47901447 | 4.677614 |
| KAAG1   | 0          | 0        |
| KAL1    | 0.20978712 | 0.321545 |
| KALP    | 0          | 0        |
| KALRN   | 0.00168783 | 0.005752 |
| KANK1   | 0.1009713  | 0.154411 |
| KANK2   | 0.17115903 | 0.247468 |
| KANK3   | 0.14333738 | 0.111412 |
| KANK4   | 0.00383884 | 0.021805 |
| KARS    | 17.0081793 | 14.86693 |
| KAT     | 16.9952155 | 16.21916 |
| KAT2A   | 0.41212892 | 0.521911 |
| KAT2B   | 11.0400421 | 10.75424 |
| KAT5    | 22.2973907 | 20.25177 |
| KATNA1  | 6.42786252 | 6.532679 |
| KATNAL1 | 0.25448368 | 0.213681 |
| KATNAL2 | 0.03351541 | 0.025383 |
| KATNB1  | 8.73274328 | 8.665799 |
| KAZALD1 | 0.25089894 | 0.351531 |
| KBTBD10 | 0          | 0.019387 |
| KBTBD11 | 25.1571512 | 28.4758  |
| KBTBD2  | 31.2092985 | 35.03579 |
| KBTBD3  | 0.83485124 | 0.829854 |
| KBTBD4  | 7.1621989  | 6.688212 |
| KBTBD5  | 0          | 0.009874 |
| KBTBD6  | 0.58314326 | 0.657891 |
| KBTBD7  | 3.71035252 | 3.360839 |
| KBTBD8  | 1.46180014 | 1.200205 |
| KC6     | 0          | 0        |
| KCMF1   | 12.9859882 | 14.0123  |
| KCNA1   | 0.00526753 | 0.002992 |
| KCNA10  | 0          | 0        |
| KCNA2   | 0          | 0.01124  |
| KCNA3   | 0.04398605 | 0.049969 |
| KCNA4   | 0.01163871 | 0        |
| KCNA5   | 0          | 0        |
| KCNA6   | 0.00351712 | 0.003996 |
| KCNA7   | 0          | 0.005463 |
| KCNAB1  | 0.26499194 | 0.179722 |
| KCNAB2  | 135.195994 | 143.0395 |
| KCNAB3  | 4.96867274 | 4.471031 |
| KCNB1   | 0          | 0        |
| KCNB2   | 0.00586972 | 0.020004 |
| KCNC1   | 0.00753956 | 0.008565 |
| KCNC2   | 0.00575406 | 0.006537 |
| KCNC3   | 0.02648027 | 0.037603 |

|        |            |          |
|--------|------------|----------|
| KCNC4  | 0.7039127  | 0.602818 |
| KCND1  | 1.49226396 | 1.685115 |
| KCND2  | 0          | 0.004479 |
| KCND3  | 0.0078074  | 0.008869 |
| KCNE1  | 0.69583436 | 0.701945 |
| KCNE1L | 2.31063364 | 1.907548 |
| KCNE2  | 0.07855043 | 0.118979 |
| KCNE3  | 45.3243128 | 45.45951 |
| KCNE4  | 0.00710075 | 0        |
| KCNF1  | 0.00918538 | 0.010435 |
| KCNG1  | 0.01894174 | 0        |
| KCNG2  | 0.07503687 | 0.170486 |
| KCNG3  | 0.02199302 | 0        |
| KCNG4  | 0          | 0        |
| KCNH1  | 0          | 0.005893 |
| KCNH2  | 38.6250472 | 49.1614  |
| KCNH3  | 1.08046082 | 1.091041 |
| KCNH4  | 0.25745303 | 0.560569 |
| KCNH5  | 0.00547107 | 0.006215 |
| KCNH6  | 0.01169048 | 0.013281 |
| KCNH7  | 0.29729837 | 0.143953 |
| KCNH8  | 0.02076371 | 0.014153 |
| KCNIP1 | 0.00988497 | 0.011229 |
| KCNIP2 | 1.77496453 | 2.094274 |
| KCNIP3 | 0.01393791 | 0.007917 |
| KCNIP4 | 0.0711999  | 0.064707 |
| KCNJ1  | 0.10379218 | 0.185286 |
| KCNJ10 | 0          | 0        |
| KCNJ11 | 0.00616217 | 0.007    |
| KCNJ12 | 0.00402014 | 0.009134 |
| KCNJ13 | 0          | 0        |
| KCNJ14 | 0.01817752 | 0.027533 |
| KCNJ15 | 0.01394253 | 0.007919 |
| KCNJ16 | 0.00496935 | 0.005645 |
| KCNJ2  | 1.13555518 | 0.913202 |
| KCNJ3  | 0          | 0        |
| KCNJ4  | 0          | 0        |
| KCNJ5  | 0.00722024 | 0        |
| KCNJ6  | 0          | 0.009612 |
| KCNJ8  | 7.88560292 | 8.255962 |
| KCNJ9  | 0.00694134 | 0.007885 |
| KCNK1  | 0          | 0.011053 |
| KCNK10 | 0.00514192 | 0.008762 |
| KCNK12 | 0.02950924 | 0.050284 |
| KCNK13 | 0          | 0.00949  |
| KCNK15 | 0          | 0        |
| KCNK16 | 0          | 0        |

|          |            |          |
|----------|------------|----------|
| KCNK17   | 0.01224539 | 0        |
| KCNK18   | 0          | 0        |
| KCNK2    | 0          | 0        |
| KCNK3    | 0.0105708  | 0        |
| KCNK4    | 0.0116162  | 0.013196 |
| KCNK5    | 0.01667354 | 0.056824 |
| KCNK6    | 26.8665789 | 34.66035 |
| KCNK7    | 2.52895855 | 2.70484  |
| KCNK9    | 0.01613609 | 0.018331 |
| KCNMA1   | 0.00437815 | 0.006632 |
| KCNMB1   | 0          | 0        |
| KCNMB2   | 0          | 0        |
| KCNMB3   | 1.1711539  | 0.999805 |
| KCNMB3L  | 0          | 0        |
| KCNMB4   | 0.02578213 | 0.117156 |
| KCNN1    | 0.00791318 | 0.035958 |
| KCNN2    | 0.00721281 | 0.016388 |
| KCNN3    | 0.00651342 | 0.007399 |
| KCNN4    | 0.03754523 | 0.021326 |
| KCNQ1    | 8.1775168  | 9.139953 |
| KCNQ1DN  | 0          | 0        |
| KCNQ1OT1 | 0          | 0        |
| KCNQ2    | 0.00621867 | 0        |
| KCNQ3    | 0.00678893 | 0.015425 |
| KCNQ4    | 0.06303097 | 0.081833 |
| KCNQ5    | 0.11382134 | 0.122119 |
| KCNRG    | 0.14232532 | 0.220478 |
| KCNS1    | 0.03242505 | 0.031573 |
| KCNS2    | 0          | 0.007539 |
| KCNS3    | 0          | 0.010251 |
| KCNT1    | 0.03487511 | 0.029714 |
| KCNT2    | 0          | 0        |
| KCNU1    | 0          | 0.006383 |
| KCNV1    | 0          | 0        |
| KCNV2    | 0          | 0        |
| KCP      | 0.0155772  | 0.008848 |
| KCTD1    | 0.01538064 | 0.011648 |
| KCTD10   | 16.2271068 | 22.12832 |
| KCTD11   | 7.68497863 | 16.55388 |
| KCTD12   | 8.69060497 | 9.64672  |
| KCTD13   | 10.5494659 | 10.92528 |
| KCTD14   | 0.05032994 | 0.07147  |
| KCTD15   | 6.62050669 | 12.71742 |
| KCTD16   | 0.00405659 | 0.004608 |
| KCTD17   | 0.01243367 | 0        |
| KCTD18   | 5.34930189 | 5.028872 |
| KCTD19   | 0          | 0.01641  |

|          |            |          |
|----------|------------|----------|
| KCTD2    | 13.3497775 | 12.05236 |
| KCTD20   | 39.9640508 | 39.71173 |
| KCTD21   | 2.45855705 | 2.036386 |
| KCTD3    | 0.01604579 | 0.024304 |
| KCTD4    | 0          | 0        |
| KCTD5    | 19.5229119 | 30.16913 |
| KCTD6    | 1.62072556 | 1.528046 |
| KCTD7    | 4.43323463 | 3.449469 |
| KCTD8    | 0.01621699 | 0        |
| KCTD9    | 8.52225069 | 8.879994 |
| KCTD9P2  | 0          | 0        |
| KDELC1   | 0          | 0        |
| KDELC2   | 0.11705125 | 0.099729 |
| KDELR1   | 9.5741552  | 8.329874 |
| KDELR2   | 28.9061543 | 40.7049  |
| KDELR3   | 0.1682924  | 0.191183 |
| KDM1     | 11.109424  | 11.87949 |
| KDM2A    | 37.551038  | 38.10463 |
| KDM2B    | 14.0254701 | 21.95876 |
| KDM3A    | 27.8092478 | 31.45262 |
| KDM3B    | 27.3887879 | 24.3619  |
| KDM4A    | 13.1169341 | 11.39429 |
| KDM4B    | 43.438844  | 48.55446 |
| KDM4C    | 9.62099641 | 9.083214 |
| KDM4D    | 0.01413943 | 0.024094 |
| KDM5A    | 18.7752955 | 17.42064 |
| KDM5B    | 11.2620408 | 11.559   |
| KDM5C    | 23.6221723 | 22.72146 |
| KDM5D    | 0.00376731 | 0.00428  |
| KDM5DP1  | 0          | 0        |
| KDM6A    | 17.0548509 | 16.86275 |
| KDM6B    | 67.0590135 | 95.97866 |
| KDR      | 0.00347239 | 0.003945 |
| KDSR     | 0.16179554 | 0.252728 |
| KEAP1    | 11.6374934 | 10.85044 |
| KEL      | 0.00825494 | 0        |
| KERA     | 0          | 0        |
| KGFLP1   | 0          | 0        |
| KGFLP2   | 0          | 0        |
| KHDC1    | 0.01854086 | 0        |
| KHDRBS1  | 33.3586257 | 31.8646  |
| KHDRBS2  | 0          | 0        |
| KHDRBS3  | 0.90246694 | 0.610248 |
| KHK      | 0.03298091 | 0.046834 |
| KHSRP    | 15.281164  | 14.29143 |
| KIAA0020 | 1.25849191 | 0.945945 |
| KIAA0040 | 0          | 0        |

|            |            |          |
|------------|------------|----------|
| KIAA0087   | 0          | 0        |
| KIAA0090   | 2.21763165 | 1.758413 |
| KIAA0100   | 33.8114258 | 29.05684 |
| KIAA0101   | 0.11183687 | 0.015881 |
| KIAA0114   | 0          | 0        |
| KIAA0125   | 0          | 0        |
| KIAA0141   | 12.3446427 | 10.50694 |
| KIAA0146   | 5.05391496 | 4.992136 |
| KIAA0174   | 73.843755  | 72.53996 |
| KIAA0182   | 34.1017195 | 49.32033 |
| KIAA0195   | 16.3846741 | 14.79268 |
| KIAA0196   | 8.96327119 | 9.024283 |
| KIAA0226   | 13.9672855 | 11.66744 |
| KIAA0232   | 13.130465  | 12.52456 |
| KIAA0240   | 8.61344717 | 8.424863 |
| KIAA0247   | 92.4132107 | 100.9791 |
| KIAA0284   | 0.34617369 | 0.353933 |
| KIAA0317   | 30.7367556 | 25.35901 |
| KIAA0319   | 0          | 0.00351  |
| KIAA0319L  | 9.34362937 | 8.627364 |
| KIAA0323   | 36.821045  | 33.3959  |
| KIAA0355   | 1.42832564 | 1.458196 |
| KIAA0368   | 8.54269637 | 8.104973 |
| KIAA0391   | 1.61051941 | 1.244111 |
| KIAA0406   | 5.07100471 | 4.711115 |
| KIAA0408   | 0          | 0        |
| KIAA0415   | 31.268814  | 32.78624 |
| KIAA0427   | 3.58369902 | 4.670319 |
| KIAA0430   | 66.2836618 | 67.98973 |
| KIAA0467   | 3.64450045 | 3.188733 |
| KIAA0494   | 30.9346165 | 30.27573 |
| KIAA0495   | 4.12702313 | 3.617704 |
| KIAA0513   | 42.5790801 | 39.78797 |
| KIAA0528   | 3.9207854  | 2.86643  |
| KIAA0556   | 6.10156819 | 5.91087  |
| KIAA0562   | 8.72000292 | 8.228576 |
| KIAA0564   | 0.08224098 | 0.054768 |
| KIAA0574   | 0.00446682 | 0.005074 |
| KIAA0586   | 1.5794382  | 1.290163 |
| KIAA0644   | 0.00831698 | 0        |
| KIAA0649   | 6.11746754 | 6.780039 |
| KIAA0652   | 21.461689  | 21.28516 |
| KIAA0664   | 1.67027419 | 1.559116 |
| KIAA0664P1 | 0          | 0        |
| KIAA0664P2 | 0          | 0        |
| KIAA0746   | 0.39748922 | 0.441053 |
| KIAA0748   | 0.32424607 | 0.218707 |

|           |            |          |
|-----------|------------|----------|
| KIAA0753  | 1.72331421 | 1.141999 |
| KIAA0754  | 0          | 0        |
| KIAA0774  | 0.01753085 | 0.019915 |
| KIAA0776  | 8.50811063 | 8.609088 |
| KIAA0802  | 2.16741757 | 3.04641  |
| KIAA0831  | 3.81311359 | 3.656809 |
| KIAA0892  | 31.336538  | 28.99386 |
| KIAA0895  | 0.18945903 | 0.089241 |
| KIAA0895L | 0.63694385 | 0.674403 |
| KIAA0907  | 13.4576397 | 12.45756 |
| KIAA0913  | 32.5271058 | 31.01994 |
| KIAA0922  | 15.5721475 | 11.54764 |
| KIAA0947  | 6.12066025 | 5.194514 |
| KIAA0999  | 17.2941922 | 16.63575 |
| KIAA1009  | 3.38009408 | 3.040261 |
| KIAA1012  | 12.3112827 | 11.29711 |
| KIAA1024  | 5.63523777 | 3.503763 |
| KIAA1024L | 0          | 0        |
| KIAA1026  | 0.01122189 | 0.005099 |
| KIAA1033  | 22.9186244 | 26.3279  |
| KIAA1045  | 0.00719184 | 0.004085 |
| KIAA1107  | 0.16613519 | 0.136307 |
| KIAA1109  | 26.1925275 | 21.85837 |
| KIAA1128  | 6.00136792 | 6.867436 |
| KIAA1143  | 6.91574298 | 6.732061 |
| KIAA1147  | 7.86144502 | 10.25659 |
| KIAA1161  | 0.12008756 | 0.073895 |
| KIAA1191  | 15.1593528 | 14.08782 |
| KIAA1199  | 0.21381693 | 0.226031 |
| KIAA1210  | 0          | 0        |
| KIAA1211  | 0.00299805 | 0.013623 |
| KIAA1217  | 0.00501021 | 0.008538 |
| KIAA1219  | 16.6844133 | 15.19509 |
| KIAA1239  | 0          | 0.003194 |
| KIAA1244  | 0.00237655 | 0        |
| KIAA1257  | 0.7723591  | 0.571014 |
| KIAA1267  | 19.8645531 | 20.112   |
| KIAA1274  | 0.04601736 | 0.031366 |
| KIAA1279  | 0.92318502 | 0.736961 |
| KIAA1303  | 1.5272192  | 1.55727  |
| KIAA1305  | 0.016056   | 0.01216  |
| KIAA1310  | 12.5117627 | 13.72998 |
| KIAA1324  | 0.0309378  | 0.035146 |
| KIAA1324L | 0.05445566 | 0.037117 |
| KIAA1328  | 0.37684462 | 0.378894 |
| KIAA1370  | 47.6398002 | 55.90373 |
| KIAA1377  | 0.13433763 | 0.088174 |



|          |            |          |
|----------|------------|----------|
| KIAA1383 | 0.38157796 | 0.394071 |
| KIAA1407 | 0.51822999 | 0.462564 |
| KIAA1409 | 0.02482036 | 0.025377 |
| KIAA1429 | 9.59874946 | 9.059044 |
| KIAA1430 | 0.49988489 | 0.558086 |
| KIAA1432 | 6.47794053 | 5.413346 |
| KIAA1462 | 0.01389278 | 0.037878 |
| KIAA1467 | 0.36150537 | 0.334625 |
| KIAA1468 | 13.188056  | 12.4418  |
| KIAA1486 | 0          | 0.005204 |
| KIAA1522 | 0.01942473 | 0.022067 |
| KIAA1524 | 1.09388879 | 0.744485 |
| KIAA1529 | 0.21129301 | 0.171452 |
| KIAA1530 | 7.56280929 | 7.378016 |
| KIAA1539 | 29.4410183 | 43.98394 |
| KIAA1543 | 0.06028769 | 0.039951 |
| KIAA1549 | 0.15271012 | 0.165856 |
| KIAA1586 | 1.28504267 | 1.171162 |
| KIAA1598 | 0.01599695 | 0.018173 |
| KIAA1602 | 2.07678779 | 2.64686  |
| KIAA1609 | 0.95284744 | 0.82608  |
| KIAA1614 | 0.23277141 | 0.224192 |
| KIAA1618 | 5.93833154 | 6.364272 |
| KIAA1632 | 10.1881289 | 8.112811 |
| KIAA1644 | 0          | 0.003543 |
| KIAA1671 | 0.00400711 | 0.006828 |
| KIAA1680 | 0.00780547 | 0.011823 |
| KIAA1683 | 1.21618502 | 1.381605 |
| KIAA1688 | 0.02860033 | 0.055698 |
| KIAA1704 | 2.58099899 | 3.052081 |
| KIAA1712 | 1.92218761 | 1.746179 |
| KIAA1715 | 6.4370701  | 5.854234 |
| KIAA1731 | 12.8755321 | 12.60471 |
| KIAA1737 | 1.13637368 | 0.977817 |
| KIAA1751 | 0          | 0        |
| KIAA1755 | 0.00655812 | 0.011175 |
| KIAA1772 | 0.01389645 | 0.02368  |
| KIAA1797 | 0.72786626 | 0.576064 |
| KIAA1804 | 0.36918295 | 0.497521 |
| KIAA1826 | 1.61021008 | 1.326626 |
| KIAA1841 | 1.01317718 | 1.189928 |
| KIAA1853 | 0.00752517 | 0        |
| KIAA1875 | 0          | 0        |
| KIAA1881 | 8.21751877 | 9.508176 |
| KIAA1908 | 0          | 0        |
| KIAA1919 | 0.94399445 | 0.651966 |
| KIAA1920 | 0          | 0        |

|                 |            |          |
|-----------------|------------|----------|
| KIAA1949        | 104.66034  | 133.4221 |
| KIAA1958        | 2.99354321 | 4.201928 |
| KIAA1967        | 44.3959734 | 50.69803 |
| KIAA1984        | 0.83903903 | 0.588717 |
| KIAA2013        | 20.9804242 | 20.93646 |
| KIAA2018        | 6.29931677 | 5.298703 |
| KIAA2022        | 0.00393254 | 0.008935 |
| KIAA2026        | 10.7198835 | 9.233763 |
| KIDINS220       | 16.16674   | 14.83207 |
| KIF11           | 0.43889033 | 0.456254 |
| KIF12           | 0          | 0.011925 |
| KIF13A          | 7.2827531  | 6.669651 |
| KIF13B          | 8.65621942 | 9.00528  |
| KIF14           | 0.06645357 | 0.141138 |
| KIF15           | 0.05216125 | 0.029628 |
| KIF16B          | 0.30373031 | 0.376823 |
| KIF17           | 0.0111304  | 0.012644 |
| KIF18A          | 0.09107132 | 0.179328 |
| KIF18B          | 0.00787761 | 0.008949 |
| KIF19           | 0.00577143 | 0        |
| KIF1A           | 0.00953962 | 0.002709 |
| KIF1B           | 7.56287036 | 8.543818 |
| KIF1C           | 2.53650075 | 2.875799 |
| KIF20A          | 0.18778025 | 0.110101 |
| KIF20B          | 0.84967661 | 0.632142 |
| KIF21A          | 0.02325811 | 0.015098 |
| KIF21B          | 33.0370739 | 37.19029 |
| KIF22           | 12.6994604 | 12.47815 |
| KIF23           | 1.12739475 | 0.779006 |
| KIF24           | 0.11142379 | 0.065207 |
| KIF25           | 0          | 0.015818 |
| KIF26A          | 0.00311164 | 0.00707  |
| KIF26B          | 0.00865596 | 0        |
| KIF27           | 1.21551989 | 1.165252 |
| KIF2A           | 4.88713794 | 4.592197 |
| KIF2B           | 0          | 0.010229 |
| KIF2C           | 0.03648964 | 0.008291 |
| KIF3A           | 0.38979357 | 0.305387 |
| KIF3B           | 7.20366493 | 9.181463 |
| KIF3C           | 0.80911327 | 0.606913 |
| KIF4A           | 0.00945596 | 0.021484 |
| KIF4B           | 0          | 0        |
| KIF5A           | 0.01079052 | 0        |
| KIF5B           | 23.7244565 | 22.37226 |
| KIF5C (NC_00000 | 0          | 0.072489 |
| KIF5C (NC_00000 | 0.52303486 | 0.228529 |
| KIF6            | 0.00529339 | 0.006013 |

|         |            |          |
|---------|------------|----------|
| KIF7    | 0          | 0.00524  |
| KIF9    | 0.21007824 | 0.245281 |
| KIFAP3  | 4.67931123 | 3.538535 |
| KIFC1   | 0.48173338 | 0.273628 |
| KIFC2   | 5.22396616 | 5.478573 |
| KIFC3   | 1.89953772 | 4.071033 |
| KILLIN  | 0.11798175 | 0.027923 |
| KIN     | 8.63737363 | 8.333472 |
| KIR2DL1 | 0          | 0.014947 |
| KIR2DL3 | 0.0790426  | 0.014966 |
| KIR2DL4 | 0.0266312  | 0.04538  |
| KIR2DP1 | 0          | 0        |
| KIR2DS4 | 0.02688661 | 0        |
| KIR3DL1 | 0          | 0        |
| KIR3DL2 | 0.01120156 | 0        |
| KIR3DL3 | 0          | 0        |
| KIR3DP1 | 0          | 0        |
| KIR3DX1 | 0          | 0        |
| KIRREL  | 0          | 0.006609 |
| KIRREL2 | 0.03512417 | 0.00798  |
| KIRREL3 | 0.04213493 | 0        |
| KISS1   | 0          | 0        |
| KISS1R  | 0.3364053  | 0.39686  |
| KIT     | 52.043381  | 41.03292 |
| KITLG   | 0          | 0        |
| KL      | 0          | 0.004771 |
| KLB     | 0.00345868 | 0.003929 |
| KLC1    | 23.1758002 | 22.17579 |
| KLC2    | 0.89401071 | 0.694122 |
| KLC3    | 0.01172634 | 0.013321 |
| KLC4    | 7.50810342 | 7.771662 |
| KLF1    | 0.03905634 | 0.029579 |
| KLF10   | 6.67061333 | 15.20469 |
| KLF11   | 1.65907078 | 1.706926 |
| KLF12   | 0.13491366 | 0.137938 |
| KLF13   | 73.8854866 | 91.35703 |
| KLF14   | 0          | 0        |
| KLF15   | 0.07494177 | 0.047297 |
| KLF16   | 7.57407142 | 9.530878 |
| KLF17   | 0.00671521 | 0.015257 |
| KLF2    | 16.8202648 | 11.21373 |
| KLF3    | 46.7387678 | 66.8145  |
| KLF4    | 0.03584271 | 0.138441 |
| KLF5    | 2.76781223 | 1.84664  |
| KLF6    | 12.6836164 | 6.098326 |
| KLF7    | 31.8907705 | 33.43041 |
| KLF7P   | 0          | 0        |

|         |            |          |
|---------|------------|----------|
| KLF8    | 0.09091142 | 0.07511  |
| KLF9    | 1.67136848 | 1.811563 |
| KLHDC1  | 0.45620246 | 0.363686 |
| KLHDC10 | 9.5933069  | 8.964262 |
| KLHDC2  | 22.9928176 | 23.42222 |
| KLHDC3  | 39.4882347 | 37.72805 |
| KLHDC4  | 4.65608983 | 4.626625 |
| KLHDC5  | 1.75509023 | 1.654124 |
| KLHDC6  | 0          | 0        |
| KLHDC7A | 0.03317606 | 0.014133 |
| KLHDC7B | 0.99116405 | 1.349577 |
| KLHDC8A | 0.01682026 | 0.038216 |
| KLHDC8B | 27.1645103 | 21.26824 |
| KLHDC9  | 0.01542577 | 0        |
| KLHL1   | 0.00506634 | 0        |
| KLHL10  | 0.01046557 | 0.011889 |
| KLHL11  | 2.32309117 | 2.392618 |
| KLHL12  | 11.3818973 | 9.989099 |
| KLHL13  | 0.37004582 | 0.252227 |
| KLHL14  | 0.00493437 | 0        |
| KLHL15  | 4.19330925 | 4.674625 |
| KLHL17  | 0.98556239 | 1.278227 |
| KLHL18  | 5.50324469 | 5.44819  |
| KLHL2   | 9.02534303 | 9.600124 |
| KLHL20  | 4.96498866 | 4.88183  |
| KLHL21  | 34.0800606 | 34.97862 |
| KLHL22  | 7.08213056 | 5.320203 |
| KLHL23  | 0.10460364 | 0.086423 |
| KLHL24  | 18.6764364 | 20.78666 |
| KLHL25  | 0.37677758 | 0.376143 |
| KLHL26  | 2.04057504 | 2.103909 |
| KLHL28  | 5.38872396 | 4.65962  |
| KLHL29  | 0.04903088 | 0.020254 |
| KLHL3   | 1.78866686 | 1.242335 |
| KLHL30  | 0.00591097 | 0        |
| KLHL31  | 0.00732207 | 0.004159 |
| KLHL32  | 0.00552281 | 0.012548 |
| KLHL33  | 0.0154371  | 0        |
| KLHL34  | 0          | 0.00841  |
| KLHL35  | 0          | 0.015955 |
| KLHL36  | 10.5562865 | 9.536424 |
| KLHL38  | 0          | 0        |
| KLHL4   | 0          | 0.004079 |
| KLHL5   | 13.947673  | 14.13966 |
| KLHL6   | 122.149854 | 140.7634 |
| KLHL7   | 9.06351933 | 7.740277 |
| KLHL8   | 3.35412841 | 2.688119 |

|        |            |          |
|--------|------------|----------|
| KLHL9  | 5.94256294 | 4.736961 |
| KLK1   | 0          | 0        |
| KLK10  | 0.01919537 | 0        |
| KLK11  | 0          | 0.016552 |
| KLK12  | 0          | 0        |
| KLK13  | 0.0167133  | 0        |
| KLK14  | 0.01855722 | 0.084325 |
| KLK15  | 0.01606213 | 0        |
| KLK2   | 0          | 0        |
| KLK3   | 0          | 0        |
| KLK4   | 0          | 0        |
| KLK5   | 0          | 0        |
| KLK6   | 0          | 0        |
| KLK7   | 0          | 0        |
| KLK8   | 0          | 0        |
| KLK9   | 0          | 0        |
| KLKB1  | 0          | 0        |
| KLKBL4 | 0          | 0        |
| KLKP1  | 0          | 0        |
| KLRA1  | 0.25710323 | 0.248803 |
| KLRAQ1 | 12.3832582 | 11.82719 |
| KLRB1  | 0.14206305 | 0.193663 |
| KLRC1  | 0.04371171 | 0.049657 |
| KLRC2  | 0.01721976 | 0.078248 |
| KLRC3  | 0.0550882  | 0.041721 |
| KLRC4  | 0.04531321 | 0.051477 |
| KLRD1  | 0.11280356 | 0.113908 |
| KLRF1  | 0.27151356 | 0.366277 |
| KLRG1  | 0.03521831 | 0.013336 |
| KLRG2  | 0.02723488 | 0.01547  |
| KLRK1  | 0.21345514 | 0.303111 |
| KMO    | 0.05030986 | 0.057153 |
| KNCN   | 0          | 0.009985 |
| KNDC1  | 0          | 0.01058  |
| KNG1   | 0          | 0.009965 |
| KNTC1  | 0.85429557 | 0.685861 |
| KPNA1  | 14.6466197 | 14.38515 |
| KPNA2  | 8.00661593 | 6.417615 |
| KPNA3  | 6.8048009  | 9.967255 |
| KPNA4  | 20.6658763 | 22.20147 |
| KPNA5  | 2.81571856 | 2.324316 |
| KPNA6  | 11.5093226 | 10.93992 |
| KPNA7  | 0.01247794 | 0        |
| KPNB1  | 52.405675  | 46.15551 |
| KPRP   | 0          | 0        |
| KPTN   | 1.64416095 | 1.499894 |
| KRAS   | 11.7557237 | 14.02881 |

|          |            |          |
|----------|------------|----------|
| KRAS1P   | 0          | 0        |
| KRBA1    | 0.48129645 | 0.647792 |
| KRBA2    | 1.30605416 | 0.851302 |
| KRCC1    | 16.5396072 | 13.66615 |
| KREMEN1  | 0.04804821 | 0.048162 |
| KREMEN2  | 0.02047257 | 0        |
| KRI1     | 4.94672512 | 5.524177 |
| KRIT1    | 6.09369805 | 5.914767 |
| KRR1     | 4.89776849 | 4.418425 |
| KRT1     | 0.01715653 | 0        |
| KRT10    | 4.66683748 | 4.018056 |
| KRT12    | 0.01055489 | 0        |
| KRT121P  | 0          | 0        |
| KRT122P  | 0          | 0        |
| KRT123P  | 0          | 0        |
| KRT124P  | 0          | 0        |
| KRT126P  | 0          | 0        |
| KRT13    | 0          | 0        |
| KRT14    | 0.01285167 | 0        |
| KRT14P   | 0          | 0        |
| KRT15    | 0.02285362 | 0.012981 |
| KRT16    | 0          | 0        |
| KRT17    | 0.0267158  | 0.015175 |
| KRT17P2  | 0          | 0        |
| KRT17P3  | 0          | 0        |
| KRT18    | 0.41091852 | 0.155603 |
| KRT18P1  | 0          | 0        |
| KRT18P10 | 0          | 0        |
| KRT18P11 | 0          | 0        |
| KRT18P12 | 0          | 0        |
| KRT18P13 | 0          | 0        |
| KRT18P14 | 0          | 0        |
| KRT18P15 | 0          | 0        |
| KRT18P16 | 0          | 0        |
| KRT18P17 | 0          | 0        |
| KRT18P18 | 0          | 0        |
| KRT18P19 | 0          | 0        |
| KRT18P2  | 0          | 0        |
| KRT18P20 | 0          | 0        |
| KRT18P21 | 0          | 0        |
| KRT18P22 | 0          | 0        |
| KRT18P23 | 0          | 0        |
| KRT18P24 | 0          | 0        |
| KRT18P25 | 0          | 0        |
| KRT18P27 | 0          | 0        |
| KRT18P28 | 0          | 0        |
| KRT18P29 | 0          | 0        |

|          |            |          |
|----------|------------|----------|
| KRT18P3  | 0          | 0        |
| KRT18P30 | 0          | 0        |
| KRT18P31 | 0          | 0        |
| KRT18P32 | 0          | 0        |
| KRT18P33 | 0          | 0        |
| KRT18P34 | 0          | 0        |
| KRT18P35 | 0          | 0        |
| KRT18P36 | 0          | 0        |
| KRT18P37 | 0          | 0        |
| KRT18P38 | 0          | 0        |
| KRT18P39 | 0          | 0        |
| KRT18P4  | 0          | 0        |
| KRT18P40 | 0          | 0        |
| KRT18P41 | 0          | 0        |
| KRT18P42 | 0          | 0        |
| KRT18P43 | 0          | 0        |
| KRT18P44 | 0          | 0        |
| KRT18P45 | 0          | 0        |
| KRT18P46 | 0          | 0        |
| KRT18P47 | 0          | 0        |
| KRT18P48 | 0          | 0        |
| KRT18P49 | 0          | 0        |
| KRT18P5  | 0          | 0        |
| KRT18P50 | 0          | 0        |
| KRT18P51 | 0          | 0        |
| KRT18P6  | 0          | 0        |
| KRT18P8  | 0          | 0        |
| KRT18P9  | 0          | 0        |
| KRT19    | 0          | 0        |
| KRT19P1  | 0          | 0        |
| KRT19P2  | 0          | 0        |
| KRT19P3  | 0          | 0        |
| KRT2     | 0.00870975 | 0.019789 |
| KRT20    | 0          | 0.013751 |
| KRT222P  | 0          | 0        |
| KRT223P  | 0          | 0        |
| KRT23    | 1.15556081 | 0.645243 |
| KRT24    | 0.01117774 | 0        |
| KRT25    | 0          | 0        |
| KRT26    | 0          | 0        |
| KRT27    | 0.01304301 | 0        |
| KRT28    | 0          | 0        |
| KRT3     | 0.01820375 | 0        |
| KRT31    | 0.01317377 | 0.014966 |
| KRT32    | 0          | 0        |
| KRT33A   | 0          | 0        |
| KRT33B   | 0          | 0        |

|         |            |          |
|---------|------------|----------|
| KRT34   | 0          | 0        |
| KRT35   | 0.01258248 | 0.014294 |
| KRT36   | 0          | 0        |
| KRT37   | 0          | 0        |
| KRT38   | 0          | 0        |
| KRT39   | 0          | 0        |
| KRT4    | 0.00816201 | 0        |
| KRT40   | 0          | 0        |
| KRT41P  | 0          | 0        |
| KRT42P  | 0          | 0        |
| KRT5    | 0          | 0.020743 |
| KRT6A   | 0          | 0        |
| KRT6B   | 0          | 0        |
| KRT6C   | 0.00918538 | 0        |
| KRT7    | 0          | 0        |
| KRT71   | 0          | 0        |
| KRT72   | 0          | 0.060164 |
| KRT73   | 0.01841097 | 0        |
| KRT74   | 0.00754137 | 0        |
| KRT75   | 0          | 0        |
| KRT76   | 0          | 0        |
| KRT77   | 0          | 0.007227 |
| KRT78   | 0          | 0.013434 |
| KRT79   | 0          | 0        |
| KRT8    | 0.04682702 | 0.039897 |
| KRT80   | 0          | 0        |
| KRT81   | 0.05504013 | 0.062526 |
| KRT82   | 0.00784235 | 0.008909 |
| KRT83   | 0          | 0        |
| KRT84   | 0          | 0        |
| KRT85   | 0.00844052 | 0.009589 |
| KRT86   | 0.02011031 | 0.034268 |
| KRT8P1  | 0          | 0        |
| KRT8P10 | 0          | 0        |
| KRT8P11 | 0          | 0        |
| KRT8P12 | 0          | 0        |
| KRT8P13 | 0          | 0        |
| KRT8P14 | 0          | 0        |
| KRT8P16 | 0          | 0        |
| KRT8P17 | 0          | 0        |
| KRT8P18 | 0          | 0        |
| KRT8P19 | 0          | 0        |
| KRT8P20 | 0          | 0        |
| KRT8P21 | 0          | 0        |
| KRT8P22 | 0          | 0        |
| KRT8P23 | 0          | 0        |
| KRT8P24 | 0          | 0        |



|            |   |         |
|------------|---|---------|
| KRT8P25    | 0 | 0       |
| KRT8P26    | 0 | 0       |
| KRT8P27    | 0 | 0       |
| KRT8P28    | 0 | 0       |
| KRT8P29    | 0 | 0       |
| KRT8P30    | 0 | 0       |
| KRT8P5     | 0 | 0       |
| KRT8P6     | 0 | 0       |
| KRT8P7     | 0 | 0       |
| KRT8P8     | 0 | 0       |
| KRT8P9     | 0 | 0       |
| KRT9       | 0 | 0.01043 |
| KRTAP10-1  | 0 | 0       |
| KRTAP10-10 | 0 | 0       |
| KRTAP10-11 | 0 | 0       |
| KRTAP10-12 | 0 | 0       |
| KRTAP10-2  | 0 | 0       |
| KRTAP10-3  | 0 | 0       |
| KRTAP10-4  | 0 | 0       |
| KRTAP10-5  | 0 | 0       |
| KRTAP10-6  | 0 | 0       |
| KRTAP10-7  | 0 | 0       |
| KRTAP10-8  | 0 | 0       |
| KRTAP10-9  | 0 | 0       |
| KRTAP1-1   | 0 | 0       |
| KRTAP11-1  | 0 | 0       |
| KRTAP12-1  | 0 | 0       |
| KRTAP12-2  | 0 | 0       |
| KRTAP12-3  | 0 | 0       |
| KRTAP12-4  | 0 | 0       |
| KRTAP1-3   | 0 | 0       |
| KRTAP13-1  | 0 | 0       |
| KRTAP13-2  | 0 | 0       |
| KRTAP13-3  | 0 | 0       |
| KRTAP13-4  | 0 | 0       |
| KRTAP13P1  | 0 | 0       |
| KRTAP13P2  | 0 | 0       |
| KRTAP1-4   | 0 | 0       |
| KRTAP1-5   | 0 | 0       |
| KRTAP15-1  | 0 | 0       |
| KRTAP17-1  | 0 | 0       |
| KRTAP19-1  | 0 | 0       |
| KRTAP19-2  | 0 | 0       |
| KRTAP19-3  | 0 | 0       |
| KRTAP19-4  | 0 | 0       |
| KRTAP19-5  | 0 | 0       |
| KRTAP19-6  | 0 | 0       |

|           |            |          |
|-----------|------------|----------|
| KRTAP19-7 | 0          | 0        |
| KRTAP19-8 | 0          | 0        |
| KRTAP19P1 | 0          | 0        |
| KRTAP19P2 | 0          | 0        |
| KRTAP19P3 | 0          | 0        |
| KRTAP20-1 | 0          | 0        |
| KRTAP20-2 | 0          | 0        |
| KRTAP20-3 | 0          | 0        |
| KRTAP20-4 | 0          | 0        |
| KRTAP2-1  | 0          | 0        |
| KRTAP21-1 | 0          | 0        |
| KRTAP21-2 | 0          | 0        |
| KRTAP21P1 | 0          | 0        |
| KRTAP2-2  | 0          | 0        |
| KRTAP22-1 | 0          | 0        |
| KRTAP23-1 | 0          | 0        |
| KRTAP2-4  | 0          | 0        |
| KRTAP24-1 | 0          | 0.014476 |
| KRTAP25-1 | 0          | 0        |
| KRTAP26-1 | 0          | 0.020608 |
| KRTAP27-1 | 0          | 0        |
| KRTAP2P1  | 0          | 0        |
| KRTAP3-1  | 0          | 0        |
| KRTAP3-2  | 0          | 0        |
| KRTAP3-3  | 0          | 0        |
| KRTAP3P1  | 0          | 0        |
| KRTAP4-1  | 0          | 0        |
| KRTAP4-11 | 0          | 0        |
| KRTAP4-12 | 0          | 0        |
| KRTAP4-2  | 0          | 0.031304 |
| KRTAP4-3  | 0          | 0        |
| KRTAP4-4  | 0.01948594 | 0        |
| KRTAP4-5  | 0          | 0        |
| KRTAP4-7  | 0          | 0        |
| KRTAP4-8  | 0          | 0        |
| KRTAP4-9  | 0          | 0        |
| KRTAP4P1  | 0          | 0        |
| KRTAP5-1  | 0.04463977 | 0        |
| KRTAP5-10 | 0          | 0.022576 |
| KRTAP5-11 | 0          | 0        |
| KRTAP5-2  | 0          | 0        |
| KRTAP5-3  | 0          | 0        |
| KRTAP5-4  | 0          | 0        |
| KRTAP5-5  | 0          | 0        |
| KRTAP5-6  | 0          | 0        |
| KRTAP5-7  | 0.02341351 | 0.026598 |
| KRTAP5-8  | 0          | 0.040381 |

|          |            |          |
|----------|------------|----------|
| KRTAP5-9 | 0.01769809 | 0.020105 |
| KRTAP6-1 | 0.09600608 | 0        |
| KRTAP6-2 | 0          | 0        |
| KRTAP6-3 | 0          | 0.038775 |
| KRTAP7-1 | 0          | 0        |
| KRTAP8-1 | 0          | 0        |
| KRTAP8P1 | 0          | 0        |
| KRTAP8P2 | 0          | 0        |
| KRTAP9-2 | 0          | 0        |
| KRTAP9-3 | 0          | 0        |
| KRTAP9-4 | 0.02174284 | 0        |
| KRTAP9-8 | 0          | 0        |
| KRTAP9-9 | 0.02282881 | 0        |
| KRTAP9P1 | 0          | 0        |
| KRTCAP2  | 29.0587755 | 27.50936 |
| KRTCAP3  | 0.95681203 | 0.724636 |
| KRTDAP   | 0          | 0        |
| KSR1     | 39.4944761 | 30.93204 |
| KSR2     | 0.00370861 | 0.002809 |
| KTELC1   | 2.88629649 | 2.298595 |
| KTI12    | 0          | 0        |
| KTN1     | 29.9053557 | 39.26239 |
| KU-MEL-3 | 0          | 0        |
| KY       | 0.6192594  | 0.301495 |
| KYNU     | 0.16357882 | 0.099108 |
| L1CAM    | 0.13796698 | 0.142484 |
| L1TD1    | 0.01090525 | 0.012389 |
| L2HGDH   | 1.47643013 | 1.732111 |
| L3MBTL   | 0.99580404 | 0.980893 |
| L3MBTL2  | 4.45931988 | 3.793781 |
| L3MBTL3  | 6.09734598 | 5.613001 |
| L3MBTL4  | 0.00586154 | 0.006659 |
| LACE1    | 0.21378542 | 0.137271 |
| LACRT    | 0          | 0        |
| LACTB    | 15.5702711 | 17.68807 |
| LACTB2   | 1.38092966 | 0.968939 |
| LAD1     | 0          | 0.016826 |
| LAG3     | 0.03166466 | 0.023981 |
| LAGE3    | 0.91464821 | 0.815461 |
| LAIR1    | 20.9581335 | 29.8479  |
| LAIR2    | 0.36094989 | 0.990942 |
| LALBA    | 0          | 0        |
| LAMA1    | 0.00662911 | 0.010041 |
| LAMA2    | 0.03904425 | 0.034498 |
| LAMA3    | 0.00392923 | 0        |
| LAMA4    | 0.00281238 | 0        |
| LAMA5    | 0.05336378 | 0.04808  |

|            |            |          |
|------------|------------|----------|
| LAMB1      | 0.46754927 | 0.335029 |
| LAMB2      | 0.01086019 | 0.008225 |
| LAMB2L     | 0          | 0        |
| LAMB3      | 0.02804624 | 0.026551 |
| LAMB4      | 0.05024832 | 0.044851 |
| LAMC1      | 0.29849627 | 0.272488 |
| LAMC2      | 0          | 0.011019 |
| LAMC3      | 0          | 0.003917 |
| LAMP1      | 59.2185896 | 57.36188 |
| LAMP2      | 22.8550812 | 19.66171 |
| LAMP3      | 0.49715688 | 0.529033 |
| LANCL1     | 1.94746558 | 1.751229 |
| LANCL2     | 0.92254496 | 0.746238 |
| LANCL3     | 0.23354465 | 0.13624  |
| LAP3       | 13.4461998 | 16.20775 |
| LAPTM4A    | 60.2170244 | 49.01522 |
| LAPTM4B    | 0.77975982 | 1.05658  |
| LAPTM5     | 1638.89639 | 1825.238 |
| LARGE      | 0.03002904 | 0.045485 |
| LARP1      | 7.77807564 | 7.11301  |
| LARP2      | 0.54506025 | 0.506235 |
| LARP4      | 2.37906261 | 2.403997 |
| LARP5      | 33.5436043 | 30.77114 |
| LARP6      | 0          | 0.010194 |
| LARP7      | 16.28297   | 15.06312 |
| LARS       | 2.21570306 | 1.896425 |
| LARS2      | 0.48023597 | 0.420532 |
| LAS1L      | 4.1043767  | 4.100406 |
| LASP1      | 124.386656 | 145.1998 |
| LASS1      | 0.01174928 | 0.020021 |
| LASS1-GDF1 | 0          | 0        |
| LASS2      | 54.4979936 | 59.87964 |
| LASS3      | 0.01079883 | 0.012268 |
| LASS4      | 22.0899047 | 31.9695  |
| LASS5      | 14.9763551 | 13.96474 |
| LASS6      | 0.92714353 | 0.973111 |
| LAT        | 1.98287674 | 2.56328  |
| LAT2       | 106.594877 | 176.909  |
| LATS1      | 6.88905692 | 6.911863 |
| LATS2      | 7.82523142 | 7.665814 |
| LAX1       | 0.07650211 | 0.09415  |
| LAYN       | 0.01017683 | 0        |
| LBA1       | 38.2455148 | 40.03881 |
| LBH        | 0.27194097 | 0.373967 |
| LBP        | 0.02306674 | 0        |
| LBR        | 26.9117774 | 19.49842 |
| LBX1       | 0.01636213 | 0.037175 |

|         |            |          |
|---------|------------|----------|
| LBX2    | 0.07240128 | 0.065799 |
| LBXCOR1 | 0.09881754 | 0.094988 |
| LCA5    | 0.00891093 | 0.005061 |
| LCA5L   | 0.35575856 | 0.444562 |
| LCAP    | 0.04534579 | 0.017171 |
| LCAT    | 5.83864434 | 7.285488 |
| LCE1A   | 0          | 0        |
| LCE1B   | 0          | 0        |
| LCE1C   | 0          | 0        |
| LCE1D   | 0          | 0        |
| LCE1E   | 0          | 0        |
| LCE1F   | 0.11778897 | 0        |
| LCE2A   | 0          | 0        |
| LCE2B   | 0          | 0        |
| LCE2C   | 0          | 0        |
| LCE2D   | 0          | 0        |
| LCE3A   | 0          | 0        |
| LCE3B   | 0          | 0        |
| LCE3C   | 0          | 0        |
| LCE3D   | 0          | 0        |
| LCE3E   | 0          | 0        |
| LCE4A   | 0          | 0        |
| LCE5A   | 0          | 0        |
| LCE6A   | 0          | 0        |
| LCEP1   | 0          | 0        |
| LCEP2   | 0          | 0        |
| LCEP3   | 0          | 0        |
| LCEP4   | 0          | 0        |
| LCK     | 0.26364051 | 0.278107 |
| LCLAT1  | 0.5567973  | 0.472038 |
| LCMT1   | 5.92392537 | 5.40466  |
| LCMT2   | 1.79414236 | 1.350597 |
| LCN1    | 0.05398031 | 0.030661 |
| LCN10   | 0.01042406 | 0        |
| LCN12   | 0.03051572 | 0.034666 |
| LCN15   | 0          | 0        |
| LCN1L1  | 0          | 0        |
| LCN1L2  | 0          | 0        |
| LCN2    | 0.10231305 | 0.145287 |
| LCN6    | 0          | 0        |
| LCN8    | 0.02290341 | 0        |
| LCN9    | 0          | 0        |
| LCNL1   | 0          | 0        |
| LCOR    | 7.0113433  | 7.18925  |
| LCORL   | 2.03646907 | 1.693784 |
| LCP1    | 307.641089 | 246.8674 |
| LCP2    | 187.005648 | 205.0944 |

|          |            |          |
|----------|------------|----------|
| LCT      | 0.00670237 | 0        |
| LCTL     | 0.05928195 | 0.044897 |
| LDB1     | 72.4520477 | 92.39507 |
| LDB2     | 0.0078365  | 0.017805 |
| LDB3     | 0.00984486 | 0.01864  |
| LDHA     | 60.2192903 | 90.53192 |
| LDHAL1   | 0          | 0        |
| LDHAL3   | 0          | 0        |
| LDHAL4   | 0          | 0        |
| LDHAL5   | 0          | 0        |
| LDHAL6A  | 0.66747082 | 0.480846 |
| LDHAL6B  | 0          | 0        |
| LDHB     | 6.76102354 | 6.709094 |
| LDHBP    | 0          | 0        |
| LDHC     | 0.06549947 | 0        |
| LDHD     | 1.02736257 | 1.051546 |
| LDLR     | 0.09184855 | 0.068049 |
| LDLRAD1  | 0.02678386 | 0        |
| LDLRAD2  | 0.00524061 | 0        |
| LDLRAD3  | 0.39657074 | 0.345928 |
| LDLRAP1  | 0.38683744 | 0.325521 |
| LDOC1    | 0.01522471 | 0.034591 |
| LDOC1L   | 0.79378128 | 0.681919 |
| LEAP2    | 0.53529838 | 0.608107 |
| LECT1    | 0.01453029 | 0        |
| LECT2    | 0          | 0        |
| LEF1     | 0.11650281 | 0.062282 |
| LEFTY1   | 0.01301072 | 0.029561 |
| LEFTY2   | 0          | 0        |
| LEFTY3   | 0          | 0        |
| LEKR1    | 0.04378757 | 0.024872 |
| LELP1    | 0          | 0        |
| LEMD1    | 0          | 0        |
| LEMD2    | 22.5812596 | 22.11755 |
| LEMD3    | 12.3740987 | 12.51652 |
| LENEP    | 0.0323965  | 0.073606 |
| LENG1    | 7.15806211 | 5.957859 |
| LENG8    | 78.8688233 | 82.19606 |
| LENG9    | 0.24104079 | 0.174253 |
| LEO1     | 3.70977674 | 2.490812 |
| LEP      | 0.0061352  | 0        |
| LEPR     | 0.38246015 | 0.306026 |
| LEPRE1   | 9.56550798 | 8.474501 |
| LEPREL1  | 0.02137807 | 0        |
| LEPREL2  | 0.04783921 | 0.018115 |
| LEPROT   | 4.80264753 | 4.393861 |
| LEPROTL1 | 13.1951156 | 15.69571 |

|          |            |          |
|----------|------------|----------|
| LETM1    | 2.99482012 | 2.85117  |
| LETM1P1  | 0          | 0        |
| LETM1P2  | 0          | 0        |
| LETM1P3  | 0          | 0        |
| LETM2    | 0.14180174 | 0.117156 |
| LETMD1   | 8.5994787  | 7.831    |
| LEUTX    | 0          | 0        |
| LFNG     | 334.065658 | 381.689  |
| LGALS1   | 27.4308977 | 39.46608 |
| LGALS12  | 180.587682 | 97.10718 |
| LGALS13  | 0          | 0        |
| LGALS14  | 0.03882794 | 0        |
| LGALS2   | 0.0398207  | 0.045237 |
| LGALS3   | 5.55796613 | 8.13397  |
| LGALS3BP | 1.82343578 | 1.986903 |
| LGALS4   | 1.01921073 | 0.952416 |
| LGALS7   | 0          | 0        |
| LGALS7B  | 0          | 0        |
| LGALS8   | 23.6742923 | 19.85095 |
| LGALS9   | 70.3824146 | 57.93899 |
| LGALS9B  | 0.10148993 | 0.076863 |
| LGALS9C  | 0.37916536 | 0.29179  |
| LGI1     | 0          | 0        |
| LGI2     | 0.00995046 | 0.003768 |
| LGI3     | 0.00643764 | 0.007313 |
| LGI4     | 0.00728024 | 0.024811 |
| LGMN     | 0.28518924 | 0.245778 |
| LGMN2P   | 0          | 0        |
| LGR4     | 0.12021344 | 0.132012 |
| LGR5     | 0.01460092 | 0.008293 |
| LGR6     | 0.01732857 | 0        |
| LGSN     | 0.00373187 | 0        |
| LGTN     | 1.19313991 | 1.161794 |
| LHB      | 0          | 0        |
| LHCGR    | 0          | 0        |
| LHFP     | 0          | 0        |
| LHFPL1   | 0          | 0.013533 |
| LHFPL2   | 0.87518722 | 1.022633 |
| LHFPL3   | 0.0066159  | 0        |
| LHFPL4   | 0.03015929 | 0.048945 |
| LHFPL5   | 0.02937866 | 0        |
| LHPP     | 3.36301016 | 3.257733 |
| LHX1     | 0.00920952 | 0        |
| LHX2     | 0.03481015 | 0.019772 |
| LHX3     | 0.00815251 | 0.009261 |
| LHX4     | 0.24735683 | 0.217137 |
| LHX5     | 0.01008893 | 0        |

|                |            |          |
|----------------|------------|----------|
| LHX6           | 0.00625754 | 0.014217 |
| LHX8           | 0          | 0        |
| LHX9           | 0          | 0        |
| LIAS           | 2.36990725 | 1.960512 |
| LIF            | 1.73288643 | 3.029063 |
| LIFR           | 0.00808433 | 0.006888 |
| LIG1           | 3.48489916 | 2.796797 |
| LIG3           | 5.93791116 | 5.872169 |
| LIG4           | 6.44558104 | 6.560458 |
| LILRA1         | 2.19059731 | 1.675709 |
| LILRA2         | 2.09654297 | 1.483463 |
| LILRA3         | 0.03999746 | 0.030292 |
| LILRA4         | 0.0984793  | 0.153827 |
| LILRA5         | 0.02605369 | 0.014799 |
| LILRA6         | 0.27284781 | 0.291727 |
| LILRB1         | 0.08999977 | 0.047188 |
| LILRB2         | 2.85126124 | 1.574208 |
| LILRB3         | 0.90799659 | 0.659483 |
| LILRB4         | 0.06044657 | 0.080113 |
| LILRB5         | 0.00927452 | 0.010536 |
| LILRP1         | 0          | 0        |
| LILRP2         | 0          | 0        |
| LIM2           | 0          | 0        |
| LIMA1          | 0.20170729 | 0.259293 |
| LIMCH1         | 0.00330483 | 0.003754 |
| LIMD1          | 1.54243755 | 1.718025 |
| LIMD2          | 243.743891 | 281.4444 |
| LIME1          | 7.47021767 | 7.828897 |
| LIMK1          | 47.8622855 | 74.18577 |
| LIMK2          | 83.0710445 | 93.75833 |
| LIMS1          | 56.0583938 | 50.6096  |
| LIMS2          | 0.03066034 | 0.017415 |
| LIMS3          | 0.01729057 | 0        |
| LIMS3-LOC4408C | 0          | 0        |
| LIN28          | 0.02619    | 0.029752 |
| LIN28B         | 0          | 0        |
| LIN37          | 16.9837951 | 14.30453 |
| LIN52          | 2.02301572 | 1.076026 |
| LIN54          | 4.72335091 | 5.599932 |
| LIN7A          | 9.79472735 | 6.89367  |
| LIN7B          | 0.47341805 | 0.506175 |
| LIN7C          | 4.34199951 | 4.233552 |
| LIN9           | 0.53700515 | 0.760764 |
| LINGO1         | 0.01434197 | 0.008146 |
| LINGO2         | 0          | 0        |
| LINGO3         | 70.0844365 | 83.46332 |
| LINGO4         | 0          | 0        |



|        |            |          |
|--------|------------|----------|
| LINS1  | 4.17732614 | 3.753772 |
| LIPA   | 8.19014586 | 4.845342 |
| LIPC   | 0          | 0        |
| LIPE   | 2.1047428  | 2.265508 |
| LIPF   | 0.01404498 | 0        |
| LIPG   | 0          | 0        |
| LIPH   | 0          | 0.009654 |
| LIPI   | 0          | 0        |
| LIPJ   | 0          | 0.016095 |
| LIPK   | 0          | 0        |
| LIPM   | 0          | 0        |
| LIPN   | 8.5014705  | 5.866518 |
| LIPT1  | 3.76536834 | 2.621705 |
| LITAF  | 106.427113 | 98.52074 |
| LIX1   | 0          | 0.012042 |
| LIX1L  | 8.14900408 | 7.296807 |
| LLGL1  | 2.12990335 | 2.272619 |
| LLGL2  | 7.70295733 | 10.9209  |
| LLPH   | 7.53249326 | 7.202823 |
| LMAN1  | 1.80900469 | 1.511653 |
| LMAN1L | 0.12111366 | 0.151346 |
| LMAN2  | 42.4867769 | 48.18743 |
| LMAN2L | 2.14298298 | 1.935838 |
| LMBR1  | 5.03490032 | 5.118936 |
| LMBR1L | 44.5701152 | 42.48392 |
| LMBRD1 | 35.2759476 | 36.98151 |
| LMBRD2 | 3.38405852 | 3.268799 |
| LMCD1  | 0          | 0        |
| LMF1   | 0.2743136  | 0.394113 |
| LMF2   | 26.9263456 | 24.58603 |
| LMLN   | 0.24687277 | 0.173613 |
| LMNA   | 1.95306987 | 1.655121 |
| LMNB1  | 47.3471193 | 38.62061 |
| LMNB2  | 2.99389826 | 3.076464 |
| LMO1   | 0          | 0        |
| LMO2   | 16.3627007 | 14.64532 |
| LMO3   | 0.01083222 | 0        |
| LMO4   | 8.96639924 | 9.792674 |
| LMO7   | 3.71093385 | 6.618224 |
| LMOD1  | 0.01590017 | 0        |
| LMOD2  | 0          | 0        |
| LMOD3  | 0.08719947 | 0.093233 |
| LMTK2  | 0.90451709 | 0.613969 |
| LMTK3  | 0.09303244 | 0.067255 |
| LMX1A  | 0.00571341 | 0        |
| LMX1B  | 0.00731316 | 0        |
| LNP1   | 0.08535317 | 0.032321 |

|              |            |          |
|--------------|------------|----------|
| LNPEP        | 6.34487047 | 5.852973 |
| LN1          | 0.53228686 | 0.700886 |
| LN2          | 2.70038077 | 2.958293 |
| LOC100008589 | 0          | 0        |
| LOC100009676 | 0          | 0        |
| LOC100034248 | 0          | 0        |
| LOC100036574 | 0          | 0        |
| LOC100036575 | 0          | 0        |
| LOC100037267 | 0          | 0        |
| LOC100049716 | 0          | 0        |
| LOC100049717 | 0          | 0        |
| LOC100093624 | 0          | 0        |
| LOC100093625 | 0          | 0        |
| LOC100093626 | 0          | 0        |
| LOC100093631 | 0          | 0        |
| LOC100101111 | 0          | 0        |
| LOC100101119 | 0          | 0        |
| LOC100101126 | 0          | 0        |
| LOC100101127 | 0          | 0        |
| LOC100101148 | 0          | 0        |
| LOC100101246 | 0          | 0        |
| LOC100101247 | 0          | 0        |
| LOC100101266 | 0          | 0        |
| LOC100101268 | 0          | 0        |
| LOC100101405 | 0          | 0        |
| LOC100101407 | 0          | 0        |
| LOC100101440 | 0          | 0        |
| LOC100101441 | 0          | 0        |
| LOC100101478 | 0          | 0        |
| LOC100101483 | 0          | 0        |
| LOC100101938 | 0          | 0        |
| LOC100113373 | 0          | 0        |
| LOC100113374 | 0          | 0        |
| LOC100113375 | 0          | 0        |
| LOC100113397 | 0          | 0        |
| LOC100113421 | 0          | 0        |
| LOC100114903 | 0          | 0        |
| LOC100118954 | 0          | 0        |
| LOC100124332 | 0          | 0        |
| LOC100124334 | 0          | 0        |
| LOC100124373 | 0          | 0        |
| LOC100124394 | 0          | 0        |
| LOC100124401 | 0          | 0        |
| LOC100124402 | 0          | 0        |
| LOC100124692 | 0          | 0        |
| LOC100125387 | 0          | 0        |
| LOC100125392 | 0          | 0        |

|              |            |          |
|--------------|------------|----------|
| LOC100125393 | 0          | 0        |
| LOC100125409 | 0          | 0        |
| LOC100125556 | 0          | 0        |
| LOC100126007 | 0          | 0        |
| LOC100126008 | 0          | 0        |
| LOC100126447 | 0          | 0        |
| LOC100126784 | 0          | 0        |
| LOC100126822 | 0          | 0        |
| LOC100127883 | 0          | 0        |
| LOC100127885 | 0.12083524 | 0.137271 |
| LOC100127886 | 0          | 0        |
| LOC100127888 | 0          | 0        |
| LOC100127890 | 0          | 0        |
| LOC100127891 | 0.41514985 | 0.136921 |
| LOC100127892 | 0          | 0        |
| LOC100127895 | 0          | 0        |
| LOC100127899 | 0          | 0        |
| LOC100127900 | 0          | 0        |
| LOC100127901 | 0          | 0        |
| LOC100127902 | 0          | 0        |
| LOC100127903 | 0          | 0        |
| LOC100127904 | 0          | 0        |
| LOC100127905 | 0          | 0        |
| LOC100127906 | 0          | 0        |
| LOC100127907 | 0          | 0        |
| LOC100127909 | 0          | 0        |
| LOC100127911 | 0          | 0        |
| LOC100127912 | 0          | 0        |
| LOC100127913 | 0.16319791 | 0.139047 |
| LOC100127914 | 0          | 0        |
| LOC100127917 | 0          | 0        |
| LOC100127919 | 0          | 0        |
| LOC100127920 | 0          | 0.039742 |
| LOC100127922 | 0.04098505 | 0.372477 |
| LOC100127925 | 0          | 0        |
| LOC100127930 | 0.06323408 | 0.035917 |
| LOC100127934 | 0          | 0        |
| LOC100127936 | 0          | 0        |
| LOC100127937 | 0          | 0        |
| LOC100127938 | 0          | 0        |
| LOC100127944 | 0.20036051 | 0.056903 |
| LOC100127945 | 0          | 0        |
| LOC100127946 | 0.02770136 | 0.062938 |
| LOC100127948 | 0          | 0        |
| LOC100127951 | 0          | 0        |
| LOC100127952 | 0          | 0        |
| LOC100127953 | 0.07884499 | 0.029856 |

|              |            |          |
|--------------|------------|----------|
| LOC100127954 | 0          | 0        |
| LOC100127958 | 0          | 0        |
| LOC100127960 | 0          | 0        |
| LOC100127961 | 0          | 0        |
| LOC100127962 | 0          | 0        |
| LOC100127965 | 0          | 0        |
| LOC100127969 | 0          | 0        |
| LOC100127973 | 0          | 0        |
| LOC100127976 | 0          | 0        |
| LOC100127977 | 0          | 0        |
| LOC100127978 | 0          | 0        |
| LOC100127979 | 0          | 0        |
| LOC100127981 | 0          | 0        |
| LOC100127982 | 0          | 0        |
| LOC100127983 | 0.04058944 | 0.09222  |
| LOC100127984 | 0.00601583 | 0.027336 |
| LOC100127986 | 0          | 0        |
| LOC100127987 | 0.01854086 | 0.021063 |
| LOC100127988 | 0          | 0.024005 |
| LOC100127989 | 0          | 0        |
| LOC100127992 | 0          | 0        |
| LOC100127998 | 0.03594074 | 0        |
| LOC100128002 | 0          | 0        |
| LOC100128003 | 0          | 0        |
| LOC100128006 | 0          | 0        |
| LOC100128007 | 0          | 0        |
| LOC100128009 | 0          | 0        |
| LOC100128010 | 0          | 0        |
| LOC100128011 | 0          | 0        |
| LOC100128012 | 0          | 0        |
| LOC100128014 | 0          | 0        |
| LOC100128015 | 0          | 0        |
| LOC100128017 | 0          | 0        |
| LOC100128020 | 0          | 0        |
| LOC100128021 | 0          | 0        |
| LOC100128022 | 0          | 0        |
| LOC100128023 | 0          | 0        |
| LOC100128024 | 0          | 0        |
| LOC100128025 | 0          | 0        |
| LOC100128026 | 0          | 0        |
| LOC100128027 | 0          | 0        |
| LOC100128028 | 0          | 0        |
| LOC100128029 | 0          | 0        |
| LOC100128031 | 0.01513703 | 0        |
| LOC100128033 | 0          | 0        |
| LOC100128035 | 0          | 0        |
| LOC100128041 | 0          | 0        |

|              |            |          |
|--------------|------------|----------|
| LOC100128042 | 0          | 0        |
| LOC100128043 | 0          | 0        |
| LOC100128044 | 0          | 0        |
| LOC100128045 | 0          | 0        |
| LOC100128048 | 0          | 0        |
| LOC100128050 | 0          | 0        |
| LOC100128052 | 0          | 0        |
| LOC100128055 | 0          | 0.017524 |
| LOC100128056 | 0.09344592 | 0        |
| LOC100128057 | 0          | 0        |
| LOC100128061 | 0          | 0        |
| LOC100128064 | 0          | 0        |
| LOC100128069 | 0          | 0        |
| LOC100128071 | 5.79562183 | 8.782064 |
| LOC100128074 | 0.01834671 | 0.104211 |
| LOC100128076 | 0          | 0        |
| LOC100128077 | 0          | 0        |
| LOC100128078 | 0          | 0        |
| LOC100128081 | 0.36146701 | 0.376413 |
| LOC100128084 | 0          | 0        |
| LOC100128086 | 0          | 0        |
| LOC100128088 | 0          | 0        |
| LOC100128090 | 0          | 0        |
| LOC100128091 | 0          | 0        |
| LOC100128092 | 0          | 0        |
| LOC100128093 | 0          | 0        |
| LOC100128094 | 0          | 0        |
| LOC100128095 | 0          | 0        |
| LOC100128096 | 0          | 0        |
| LOC100128098 | 0          | 0        |
| LOC100128100 | 0          | 0        |
| LOC100128103 | 0          | 0        |
| LOC100128105 | 0.0851228  | 0        |
| LOC100128108 | 0.91777238 | 0.805649 |
| LOC100128109 | 0          | 0        |
| LOC100128110 | 0          | 0        |
| LOC100128111 | 0          | 0        |
| LOC100128113 | 0          | 0        |
| LOC100128118 | 0          | 0        |
| LOC100128120 | 0          | 0        |
| LOC100128121 | 0          | 0        |
| LOC100128122 | 0          | 0        |
| LOC100128126 | 0          | 0        |
| LOC100128127 | 0.00649732 | 0.014762 |
| LOC100128130 | 0          | 0        |
| LOC100128131 | 0          | 0        |
| LOC100128132 | 0          | 0        |

|              |            |          |
|--------------|------------|----------|
| LOC100128134 | 0          | 0        |
| LOC100128135 | 0          | 0        |
| LOC100128136 | 0          | 0        |
| LOC100128139 | 0.02837427 | 0        |
| LOC100128142 | 0.01849194 | 0        |
| LOC100128144 | 0          | 0        |
| LOC100128145 | 0          | 0        |
| LOC100128149 | 0          | 0        |
| LOC100128154 | 0          | 0        |
| LOC100128156 | 0          | 0        |
| LOC100128159 | 0          | 0        |
| LOC100128160 | 0          | 0        |
| LOC100128163 | 0.05217204 | 0.079024 |
| LOC100128164 | 0          | 0        |
| LOC100128166 | 0          | 0        |
| LOC100128169 | 0          | 0        |
| LOC100128171 | 0          | 0        |
| LOC100128173 | 0          | 0        |
| LOC100128174 | 0          | 0        |
| LOC100128177 | 0          | 0        |
| LOC100128179 | 0          | 0        |
| LOC100128182 | 0          | 0        |
| LOC100128183 | 0          | 0        |
| LOC100128185 | 0          | 0        |
| LOC100128186 | 0          | 0        |
| LOC100128187 | 0          | 0        |
| LOC100128191 | 0          | 0        |
| LOC100128203 | 0          | 0        |
| LOC100128204 | 0          | 0        |
| LOC100128210 | 0          | 0        |
| LOC100128211 | 0          | 0        |
| LOC100128215 | 0          | 0        |
| LOC100128217 | 0          | 0        |
| LOC100128220 | 0          | 0        |
| LOC100128221 | 0.06893551 | 0        |
| LOC100128222 | 0          | 0        |
| LOC100128227 | 0          | 0        |
| LOC100128230 | 0          | 0        |
| LOC100128235 | 0          | 0        |
| LOC100128237 | 0          | 0        |
| LOC100128238 | 0          | 0        |
| LOC100128239 | 0          | 0        |
| LOC100128240 | 0          | 0        |
| LOC100128242 | 0          | 0        |
| LOC100128248 | 0          | 0        |
| LOC100128252 | 1.97885468 | 1.686008 |
| LOC100128253 | 0          | 0        |

|              |            |          |
|--------------|------------|----------|
| LOC100128254 | 0          | 0        |
| LOC100128256 | 0          | 0        |
| LOC100128260 | 0.28914993 | 0.547465 |
| LOC100128264 | 0          | 0        |
| LOC100128266 | 0          | 0        |
| LOC100128267 | 0          | 0        |
| LOC100128268 | 0          | 0        |
| LOC100128270 | 0          | 0        |
| LOC100128272 | 0          | 0        |
| LOC100128275 | 0          | 0        |
| LOC100128276 | 0          | 0        |
| LOC100128282 | 0          | 0        |
| LOC100128284 | 0          | 0        |
| LOC100128288 | 0          | 0        |
| LOC100128292 | 0          | 0        |
| LOC100128293 | 0          | 0        |
| LOC100128297 | 0          | 0        |
| LOC100128299 | 0          | 0        |
| LOC100128300 | 0          | 0        |
| LOC100128302 | 0          | 0        |
| LOC100128304 | 0          | 0.014735 |
| LOC100128307 | 0          | 0        |
| LOC100128312 | 0          | 0        |
| LOC100128313 | 0          | 0        |
| LOC100128317 | 0          | 0        |
| LOC100128319 | 0          | 0        |
| LOC100128321 | 0          | 0        |
| LOC100128324 | 0          | 0        |
| LOC100128326 | 0.0466711  | 0        |
| LOC100128328 | 0.01212534 | 0.013775 |
| LOC100128334 | 0.031428   | 0        |
| LOC100128335 | 0          | 0        |
| LOC100128336 | 0          | 0.031345 |
| LOC100128337 | 0          | 0        |
| LOC100128339 | 0          | 0        |
| LOC100128340 | 0          | 0        |
| LOC100128341 | 0          | 0        |
| LOC100128345 | 0          | 0        |
| LOC100128346 | 0.06449488 | 0.073267 |
| LOC100128349 | 0          | 0        |
| LOC100128354 | 0          | 0        |
| LOC100128355 | 0          | 0.071299 |
| LOC100128356 | 0          | 0        |
| LOC100128360 | 0          | 0        |
| LOC100128361 | 0          | 0.008564 |
| LOC100128362 | 0          | 0        |
| LOC100128364 | 0          | 0        |

|              |            |          |
|--------------|------------|----------|
| LOC100128365 | 0          | 0        |
| LOC100128366 | 0          | 0        |
| LOC100128367 | 0          | 0        |
| LOC100128368 | 0          | 0        |
| LOC100128370 | 1.13511888 | 1.056569 |
| LOC100128372 | 0.07874656 | 0.089457 |
| LOC100128373 | 0          | 0        |
| LOC100128374 | 0          | 0        |
| LOC100128379 | 0          | 0        |
| LOC100128381 | 0          | 0        |
| LOC100128382 | 0.0077814  | 0        |
| LOC100128384 | 0          | 0        |
| LOC100128386 | 0          | 0        |
| LOC100128392 | 0.19245154 | 0.255066 |
| LOC100128397 | 0          | 0        |
| LOC100128398 | 0.66747082 | 0.568693 |
| LOC100128403 | 0.00392337 | 0.004457 |
| LOC100128407 | 0          | 0        |
| LOC100128410 | 0          | 0        |
| LOC100128412 | 0          | 0        |
| LOC100128413 | 0          | 0        |
| LOC100128415 | 0          | 0        |
| LOC100128416 | 0          | 0        |
| LOC100128427 | 0          | 0        |
| LOC100128428 | 0          | 0        |
| LOC100128430 | 0          | 0        |
| LOC100128435 | 0          | 0.0231   |
| LOC100128440 | 5.31560296 | 6.081135 |
| LOC100128441 | 0          | 0        |
| LOC100128442 | 0          | 0        |
| LOC100128448 | 0          | 0        |
| LOC100128449 | 0          | 0        |
| LOC100128454 | 0          | 0        |
| LOC100128455 | 0          | 0        |
| LOC100128456 | 0          | 0        |
| LOC100128459 | 0          | 0        |
| LOC100128460 | 0          | 0        |
| LOC100128462 | 0          | 0        |
| LOC100128464 | 0          | 0        |
| LOC100128465 | 0          | 0        |
| LOC100128467 | 0          | 0        |
| LOC100128469 | 0          | 0        |
| LOC100128471 | 0.11822202 | 0.134302 |
| LOC100128472 | 0          | 0        |
| LOC100128473 | 0          | 0        |
| LOC100128476 | 0          | 0.011347 |
| LOC100128483 | 0          | 0        |



|              |            |          |
|--------------|------------|----------|
| LOC100128489 | 0          | 0        |
| LOC100128493 | 0          | 0        |
| LOC100128495 | 0          | 0        |
| LOC100128496 | 0          | 0        |
| LOC100128497 | 0          | 0        |
| LOC100128503 | 0          | 0        |
| LOC100128507 | 0          | 0        |
| LOC100128511 | 0          | 0.01711  |
| LOC100128512 | 0          | 0        |
| LOC100128514 | 0          | 0        |
| LOC100128516 | 0          | 0        |
| LOC100128521 | 0          | 0        |
| LOC100128523 | 0          | 0        |
| LOC100128526 | 0          | 0        |
| LOC100128528 | 0.02521023 | 0.028639 |
| LOC100128534 | 0          | 0        |
| LOC100128536 | 0          | 0        |
| LOC100128540 | 0          | 0        |
| LOC100128541 | 0          | 0        |
| LOC100128542 | 0.043262   | 0        |
| LOC100128546 | 0          | 0        |
| LOC100128548 | 0          | 0        |
| LOC100128556 | 0          | 0        |
| LOC100128558 | 0          | 0        |
| LOC100128559 | 0          | 0.009061 |
| LOC100128561 | 0          | 0        |
| LOC100128572 | 0.02924246 | 0        |
| LOC100128573 | 0          | 0        |
| LOC100128574 | 0          | 0.034417 |
| LOC100128575 | 0          | 0        |
| LOC100128579 | 0          | 0        |
| LOC100128586 | 0          | 0        |
| LOC100128588 | 0.01448026 | 0        |
| LOC100128589 | 0          | 0        |
| LOC100128592 | 0          | 0        |
| LOC100128595 | 0          | 0        |
| LOC100128596 | 0          | 0        |
| LOC100128597 | 0          | 0.042275 |
| LOC100128598 | 0          | 0.011617 |
| LOC100128601 | 0          | 0        |
| LOC100128602 | 0          | 0.090991 |
| LOC100128603 | 0          | 0        |
| LOC100128610 | 0          | 0        |
| LOC100128613 | 0          | 0        |
| LOC100128615 | 0.04711559 | 0.040143 |
| LOC100128618 | 0          | 0        |
| LOC100128621 | 0          | 0        |

|              |            |          |
|--------------|------------|----------|
| LOC100128622 | 0          | 0        |
| LOC100128625 | 0          | 0        |
| LOC100128626 | 0          | 0        |
| LOC100128627 | 0          | 0        |
| LOC100128628 | 0          | 0        |
| LOC100128631 | 0          | 0        |
| LOC100128637 | 0          | 0        |
| LOC100128638 | 0          | 0        |
| LOC100128639 | 0          | 0        |
| LOC100128648 | 0.07845273 | 0.029708 |
| LOC100128655 | 0          | 0        |
| LOC100128656 | 0          | 0        |
| LOC100128657 | 0          | 0        |
| LOC100128659 | 0          | 0        |
| LOC100128672 | 0          | 0        |
| LOC100128673 | 0          | 0        |
| LOC100128674 | 0          | 0        |
| LOC100128675 | 0          | 0        |
| LOC100128676 | 0          | 0        |
| LOC100128678 | 0          | 0        |
| LOC100128681 | 0          | 0        |
| LOC100128682 | 0.11680739 | 0.053078 |
| LOC100128683 | 0          | 0        |
| LOC100128685 | 0          | 0        |
| LOC100128686 | 0          | 0        |
| LOC100128688 | 0          | 0        |
| LOC100128690 | 0          | 0        |
| LOC100128691 | 0          | 0.100994 |
| LOC100128695 | 0          | 0        |
| LOC100128696 | 0          | 0        |
| LOC100128701 | 0          | 0        |
| LOC100128703 | 0.12579258 | 0.020415 |
| LOC100128705 | 0          | 0        |
| LOC100128707 | 0          | 0        |
| LOC100128711 | 0          | 0        |
| LOC100128712 | 0          | 0        |
| LOC100128713 | 0          | 0        |
| LOC100128714 | 0          | 0        |
| LOC100128717 | 0          | 0        |
| LOC100128719 | 0.02282881 | 0        |
| LOC100128721 | 0          | 0        |
| LOC100128723 | 0          | 0        |
| LOC100128725 | 0          | 0        |
| LOC100128729 | 0          | 0        |
| LOC100128731 | 100.032221 | 91.61681 |
| LOC100128733 | 0          | 0        |
| LOC100128737 | 1.26706326 | 0.86964  |

|              |            |          |
|--------------|------------|----------|
| LOC100128738 | 0          | 0        |
| LOC100128739 | 0          | 0        |
| LOC100128743 | 0          | 0        |
| LOC100128747 | 0          | 0        |
| LOC100128749 | 0          | 0        |
| LOC100128750 | 0          | 0        |
| LOC100128757 | 0          | 0        |
| LOC100128759 | 0          | 0        |
| LOC100128762 | 0          | 0        |
| LOC100128764 | 0          | 0        |
| LOC100128769 | 0          | 0        |
| LOC100128770 | 0          | 0        |
| LOC100128771 | 0          | 0        |
| LOC100128772 | 0          | 0        |
| LOC100128775 | 0          | 0        |
| LOC100128776 | 0          | 0        |
| LOC100128777 | 0          | 0        |
| LOC100128786 | 0          | 0        |
| LOC100128787 | 0          | 0        |
| LOC100128788 | 0          | 0        |
| LOC100128789 | 4.77848431 | 4.817735 |
| LOC100128790 | 0          | 0        |
| LOC100128795 | 0          | 0        |
| LOC100128800 | 0          | 0        |
| LOC100128801 | 0          | 0        |
| LOC100128803 | 0          | 0        |
| LOC100128804 | 0          | 0        |
| LOC100128808 | 0          | 0        |
| LOC100128811 | 0          | 0        |
| LOC100128816 | 6.29301283 | 5.349886 |
| LOC100128817 | 0          | 0        |
| LOC100128822 | 0          | 0        |
| LOC100128823 | 0          | 0.010941 |
| LOC100128825 | 0          | 0        |
| LOC100128827 | 0          | 0        |
| LOC100128831 | 0          | 0        |
| LOC100128832 | 0          | 0        |
| LOC100128833 | 0          | 0        |
| LOC100128834 | 0          | 0        |
| LOC100128836 | 0          | 0        |
| LOC100128838 | 0.023571   | 0        |
| LOC100128843 | 0.39020811 | 0.443283 |
| LOC100128845 | 0          | 0        |
| LOC100128848 | 0          | 0        |
| LOC100128849 | 0          | 0        |
| LOC100128852 | 0          | 0        |
| LOC100128854 | 0          | 0        |

|              |            |          |
|--------------|------------|----------|
| LOC100128857 | 0          | 0        |
| LOC100128858 | 0          | 0        |
| LOC100128859 | 0.07744137 | 0.087975 |
| LOC100128865 | 0          | 0        |
| LOC100128867 | 0          | 0        |
| LOC100128869 | 0          | 0        |
| LOC100128874 | 0          | 0        |
| LOC100128875 | 0          | 0        |
| LOC100128878 | 0          | 0        |
| LOC100128880 | 0          | 0        |
| LOC100128881 | 0          | 0        |
| LOC100128885 | 0          | 0        |
| LOC100128893 | 0          | 0.026717 |
| LOC100128895 | 0          | 0        |
| LOC100128898 | 0          | 0        |
| LOC100128899 | 0          | 0        |
| LOC100128902 | 0          | 0        |
| LOC100128903 | 0          | 0        |
| LOC100128904 | 0.06377755 | 0.048302 |
| LOC100128905 | 0          | 0        |
| LOC100128906 | 0          | 0        |
| LOC100128908 | 0          | 0        |
| LOC100128909 | 0.93101097 | 0.176274 |
| LOC100128911 | 0          | 0        |
| LOC100128914 | 0          | 0        |
| LOC100128916 | 0          | 0.012725 |
| LOC100128921 | 0          | 0        |
| LOC100128922 | 0          | 0        |
| LOC100128926 | 0          | 0        |
| LOC100128929 | 0          | 0        |
| LOC100128930 | 0          | 0        |
| LOC100128932 | 0          | 0        |
| LOC100128934 | 0          | 0        |
| LOC100128935 | 0          | 0        |
| LOC100128937 | 0          | 0        |
| LOC100128939 | 0          | 0        |
| LOC100128942 | 0.03402157 | 0.038649 |
| LOC100128943 | 0.92306331 | 0.504888 |
| LOC100128944 | 0          | 0        |
| LOC100128946 | 0          | 0        |
| LOC100128948 | 0          | 0        |
| LOC100128949 | 0          | 0        |
| LOC100128956 | 0.03515942 | 0        |
| LOC100128958 | 0          | 0        |
| LOC100128960 | 0          | 0        |
| LOC100128964 | 0          | 0        |
| LOC100128974 | 0          | 0        |

|              |            |          |
|--------------|------------|----------|
| LOC100128975 | 0.20168183 | 0.114557 |
| LOC100128977 | 0          | 0        |
| LOC100128979 | 0          | 0        |
| LOC100128980 | 0          | 0        |
| LOC100128981 | 0          | 0        |
| LOC100128982 | 0          | 0        |
| LOC100128983 | 0          | 0        |
| LOC100128985 | 0          | 0        |
| LOC100128987 | 0          | 0        |
| LOC100128989 | 0          | 0        |
| LOC100128990 | 0          | 0        |
| LOC100128991 | 0          | 0        |
| LOC100128993 | 0          | 0        |
| LOC100128994 | 0          | 0.030311 |
| LOC100128997 | 0.01732857 | 0.006562 |
| LOC100129000 | 0          | 0        |
| LOC100129001 | 0          | 0        |
| LOC100129002 | 0          | 0.01246  |
| LOC100129003 | 0          | 0        |
| LOC100129005 | 0          | 0        |
| LOC100129008 | 0          | 0        |
| LOC100129009 | 0          | 0        |
| LOC100129010 | 0          | 0        |
| LOC100129011 | 0          | 0        |
| LOC100129013 | 0          | 0        |
| LOC100129023 | 0          | 0        |
| LOC100129024 | 0          | 0        |
| LOC100129027 | 0          | 0        |
| LOC100129030 | 0          | 0        |
| LOC100129031 | 0          | 0        |
| LOC100129032 | 0          | 0        |
| LOC100129033 | 0          | 0        |
| LOC100129035 | 0.25331724 | 0.071943 |
| LOC100129036 | 0.01865602 | 0        |
| LOC100129037 | 0          | 0        |
| LOC100129040 | 0          | 0        |
| LOC100129045 | 0          | 0        |
| LOC100129046 | 0.04548476 | 0.038754 |
| LOC100129049 | 0          | 0        |
| LOC100129050 | 0          | 0        |
| LOC100129052 | 0          | 0        |
| LOC100129053 | 0          | 0        |
| LOC100129055 | 0          | 0        |
| LOC100129058 | 0          | 0        |
| LOC100129060 | 0          | 0        |
| LOC100129063 | 0          | 0        |
| LOC100129066 | 0          | 0        |

|              |            |          |
|--------------|------------|----------|
| LOC100129067 | 0          | 0        |
| LOC100129070 | 0          | 0        |
| LOC100129074 | 0          | 0        |
| LOC100129078 | 0          | 0        |
| LOC100129080 | 0          | 0        |
| LOC100129081 | 0.02634753 | 0        |
| LOC100129083 | 0.04202265 | 0.015913 |
| LOC100129085 | 0          | 0        |
| LOC100129091 | 0          | 0        |
| LOC100129094 | 0.08283124 | 0.109781 |
| LOC100129096 | 0          | 0        |
| LOC100129098 | 0          | 0        |
| LOC100129099 | 0          | 0        |
| LOC100129100 | 0          | 0        |
| LOC100129101 | 0.14991323 | 0.127728 |
| LOC100129103 | 0.02323241 | 0.026392 |
| LOC100129104 | 0          | 0        |
| LOC100129107 | 0          | 0        |
| LOC100129108 | 0          | 0        |
| LOC100129116 | 0          | 0        |
| LOC100129118 | 0.51502972 | 0.240916 |
| LOC100129119 | 0          | 0.215181 |
| LOC100129122 | 0.02508989 | 0.028503 |
| LOC100129123 | 0          | 0        |
| LOC100129124 | 0          | 0        |
| LOC100129126 | 0          | 0        |
| LOC100129127 | 0          | 0        |
| LOC100129128 | 0          | 0.037614 |
| LOC100129130 | 0          | 0        |
| LOC100129133 | 0          | 0        |
| LOC100129135 | 0          | 0        |
| LOC100129137 | 0          | 0        |
| LOC100129138 | 0          | 0        |
| LOC100129140 | 0          | 0        |
| LOC100129143 | 0          | 0        |
| LOC100129144 | 0          | 0        |
| LOC100129148 | 1.48573003 | 1.432084 |
| LOC100129149 | 0          | 0        |
| LOC100129154 | 0          | 0        |
| LOC100129155 | 0          | 0        |
| LOC100129156 | 0          | 0        |
| LOC100129160 | 0          | 0        |
| LOC100129162 | 0.03788348 | 0.043036 |
| LOC100129167 | 0          | 0        |
| LOC100129168 | 0          | 0        |
| LOC100129169 | 4.1141717  | 4.10313  |
| LOC100129174 | 0          | 0.091514 |

|              |            |          |
|--------------|------------|----------|
| LOC100129178 | 0          | 0        |
| LOC100129182 | 0          | 0        |
| LOC100129184 | 0          | 0        |
| LOC100129186 | 0          | 0        |
| LOC100129191 | 0.42358725 | 0.481202 |
| LOC100129192 | 0          | 0        |
| LOC100129193 | 0          | 0        |
| LOC100129194 | 0.33285484 | 0.592401 |
| LOC100129195 | 1.13894742 | 1.122717 |
| LOC100129196 | 0          | 0.064729 |
| LOC100129200 | 0.03734517 | 0        |
| LOC100129202 | 0          | 0        |
| LOC100129203 | 0.04445102 | 0.050497 |
| LOC100129204 | 0          | 0        |
| LOC100129205 | 0          | 0        |
| LOC100129213 | 0          | 0        |
| LOC100129214 | 0          | 0        |
| LOC100129216 | 0          | 0        |
| LOC100129218 | 0          | 0.012988 |
| LOC100129228 | 0          | 0        |
| LOC100129229 | 0          | 0        |
| LOC100129231 | 0          | 0        |
| LOC100129236 | 0          | 0        |
| LOC100129238 | 0          | 0        |
| LOC100129245 | 0          | 0        |
| LOC100129250 | 0          | 0        |
| LOC100129251 | 0          | 0        |
| LOC100129254 | 0          | 0        |
| LOC100129255 | 0          | 0        |
| LOC100129256 | 0          | 0        |
| LOC100129259 | 0          | 0        |
| LOC100129260 | 0          | 0        |
| LOC100129262 | 0          | 0        |
| LOC100129265 | 0          | 0        |
| LOC100129268 | 0          | 0.035944 |
| LOC100129272 | 0          | 0        |
| LOC100129274 | 0          | 0        |
| LOC100129276 | 0          | 0        |
| LOC100129277 | 0          | 0        |
| LOC100129278 | 0          | 0.003826 |
| LOC100129282 | 0          | 0        |
| LOC100129283 | 0          | 0        |
| LOC100129288 | 0          | 0        |
| LOC100129291 | 0          | 0        |
| LOC100129293 | 0          | 0        |
| LOC100129297 | 0          | 0        |
| LOC100129298 | 0          | 0        |

|              |            |          |
|--------------|------------|----------|
| LOC100129299 | 0          | 0        |
| LOC100129303 | 0          | 0        |
| LOC100129305 | 0          | 0        |
| LOC100129307 | 0          | 0        |
| LOC100129308 | 0          | 0        |
| LOC100129309 | 0          | 0        |
| LOC100129313 | 0          | 0        |
| LOC100129315 | 0          | 0        |
| LOC100129319 | 0          | 0        |
| LOC100129320 | 0          | 0        |
| LOC100129321 | 0          | 0        |
| LOC100129323 | 0.13787102 | 0.113908 |
| LOC100129325 | 0          | 0        |
| LOC100129326 | 0          | 0        |
| LOC100129329 | 0          | 0        |
| LOC100129331 | 0          | 0        |
| LOC100129335 | 0.02079657 | 0        |
| LOC100129337 | 0          | 0        |
| LOC100129340 | 0          | 0        |
| LOC100129341 | 0          | 0        |
| LOC100129344 | 0          | 0        |
| LOC100129348 | 0          | 0        |
| LOC100129351 | 0          | 0        |
| LOC100129352 | 0          | 0        |
| LOC100129354 | 0          | 0        |
| LOC100129355 | 0          | 0        |
| LOC100129356 | 0          | 0        |
| LOC100129358 | 0          | 0        |
| LOC100129361 | 5.01116797 | 4.957497 |
| LOC100129362 | 0.0466711  | 0.02651  |
| LOC100129367 | 0          | 0        |
| LOC100129368 | 0          | 0        |
| LOC100129370 | 0          | 0        |
| LOC100129375 | 0          | 0        |
| LOC100129376 | 2.46220868 | 0.63072  |
| LOC100129381 | 0          | 0        |
| LOC100129382 | 0          | 0        |
| LOC100129384 | 0          | 0        |
| LOC100129387 | 0          | 0        |
| LOC100129388 | 0          | 0        |
| LOC100129390 | 0.03161704 | 0        |
| LOC100129391 | 0          | 0        |
| LOC100129395 | 0          | 0        |
| LOC100129396 | 0          | 0        |
| LOC100129398 | 0          | 0        |
| LOC100129401 | 0          | 0        |
| LOC100129402 | 0          | 0        |



|              |            |          |
|--------------|------------|----------|
| LOC100129403 | 0          | 0        |
| LOC100129404 | 0          | 0        |
| LOC100129407 | 0.07772766 | 0        |
| LOC100129409 | 0          | 0        |
| LOC100129410 | 0          | 0        |
| LOC100129411 | 0          | 0        |
| LOC100129413 | 0.02430674 | 0        |
| LOC100129416 | 0          | 0        |
| LOC100129417 | 0          | 0        |
| LOC100129422 | 0          | 0        |
| LOC100129423 | 0          | 0        |
| LOC100129428 | 0          | 0        |
| LOC100129434 | 0.00685087 | 0        |
| LOC100129436 | 0          | 0        |
| LOC100129438 | 0          | 0        |
| LOC100129442 | 0          | 0        |
| LOC100129452 | 0          | 0        |
| LOC100129455 | 0          | 0        |
| LOC100129456 | 0          | 0        |
| LOC100129457 | 0          | 0        |
| LOC100129459 | 0          | 0        |
| LOC100129461 | 0          | 0        |
| LOC100129463 | 0.01747742 | 0.009927 |
| LOC100129465 | 0.03569666 | 0        |
| LOC100129471 | 0          | 0        |
| LOC100129472 | 0          | 0        |
| LOC100129474 | 0          | 0        |
| LOC100129478 | 0.15607351 | 0        |
| LOC100129480 | 0.07640523 | 0.086798 |
| LOC100129483 | 0          | 0        |
| LOC100129484 | 0          | 0        |
| LOC100129488 | 0          | 0        |
| LOC100129489 | 0.0326988  | 0        |
| LOC100129497 | 0          | 0        |
| LOC100129499 | 0          | 0        |
| LOC100129500 | 0.048168   | 0        |
| LOC100129501 | 0          | 0        |
| LOC100129503 | 0          | 0        |
| LOC100129507 | 0          | 0        |
| LOC100129509 | 0.01185862 | 0        |
| LOC100129512 | 0          | 0        |
| LOC100129514 | 0          | 0.037614 |
| LOC100129516 | 0          | 0        |
| LOC100129518 | 0          | 0        |
| LOC100129520 | 0          | 0        |
| LOC100129526 | 0          | 0        |
| LOC100129527 | 0          | 0        |

|              |            |          |
|--------------|------------|----------|
| LOC100129528 | 0          | 0        |
| LOC100129531 | 0.02814636 | 0        |
| LOC100129532 | 0.09101875 | 0        |
| LOC100129534 | 0          | 0        |
| LOC100129536 | 0          | 0        |
| LOC100129537 | 0          | 0        |
| LOC100129538 | 0.02441966 | 0        |
| LOC100129539 | 0          | 0        |
| LOC100129540 | 0          | 0        |
| LOC100129544 | 0          | 0        |
| LOC100129550 | 0          | 0        |
| LOC100129551 | 0.03309773 | 0.056399 |
| LOC100129554 | 0          | 0        |
| LOC100129557 | 0          | 0        |
| LOC100129558 | 0          | 0        |
| LOC100129559 | 0          | 0        |
| LOC100129561 | 0          | 0        |
| LOC100129564 | 0          | 0        |
| LOC100129566 | 0          | 0.051037 |
| LOC100129567 | 0          | 0        |
| LOC100129570 | 0          | 0        |
| LOC100129571 | 0          | 0        |
| LOC100129573 | 0          | 0        |
| LOC100129574 | 0          | 0        |
| LOC100129575 | 0          | 0        |
| LOC100129577 | 0          | 0        |
| LOC100129578 | 0          | 0        |
| LOC100129582 | 0          | 0        |
| LOC100129585 | 0.06731696 | 0.127455 |
| LOC100129586 | 0          | 0        |
| LOC100129587 | 0          | 0        |
| LOC100129588 | 0          | 0        |
| LOC100129589 | 0          | 0        |
| LOC100129595 | 0          | 0        |
| LOC100129596 | 0          | 0        |
| LOC100129597 | 0          | 0        |
| LOC100129601 | 0          | 0        |
| LOC100129603 | 0          | 0.050179 |
| LOC100129604 | 0          | 0        |
| LOC100129606 | 0          | 0        |
| LOC100129607 | 0          | 0        |
| LOC100129611 | 0          | 0        |
| LOC100129615 | 0          | 0        |
| LOC100129616 | 0          | 0        |
| LOC100129619 | 0          | 0        |
| LOC100129622 | 0          | 0        |
| LOC100129623 | 0.01664713 | 0        |

|              |            |          |
|--------------|------------|----------|
| LOC100129626 | 0          | 0        |
| LOC100129627 | 0          | 0        |
| LOC100129629 | 0          | 0        |
| LOC100129630 | 0          | 0        |
| LOC100129633 | 0.03135769 | 0        |
| LOC100129636 | 0.02892068 | 0        |
| LOC100129637 | 0          | 0        |
| LOC100129640 | 0          | 0        |
| LOC100129641 | 0          | 0        |
| LOC100129646 | 0          | 0        |
| LOC100129649 | 0          | 0        |
| LOC100129654 | 0          | 0.033313 |
| LOC100129655 | 0          | 0        |
| LOC100129656 | 0.06352064 | 0.108241 |
| LOC100129661 | 0          | 0        |
| LOC100129664 | 0          | 0        |
| LOC100129666 | 0          | 0        |
| LOC100129667 | 0          | 0        |
| LOC100129672 | 0          | 0        |
| LOC100129677 | 0          | 0        |
| LOC100129682 | 0          | 0        |
| LOC100129683 | 0          | 0        |
| LOC100129684 | 0          | 0        |
| LOC100129687 | 0          | 0        |
| LOC100129690 | 0          | 0        |
| LOC100129692 | 0          | 0        |
| LOC100129693 | 0          | 0        |
| LOC100129694 | 0          | 0        |
| LOC100129696 | 0          | 0        |
| LOC100129697 | 0          | 0        |
| LOC100129699 | 0          | 0        |
| LOC100129700 | 0          | 0        |
| LOC100129702 | 0          | 0        |
| LOC100129706 | 0          | 0        |
| LOC100129707 | 0          | 0        |
| LOC100129708 | 0          | 0        |
| LOC100129711 | 0.04822324 | 0.054782 |
| LOC100129712 | 0          | 0        |
| LOC100129714 | 0          | 0        |
| LOC100129716 | 0          | 0        |
| LOC100129717 | 0          | 0        |
| LOC100129720 | 0.2323241  | 0.197943 |
| LOC100129723 | 0          | 0        |
| LOC100129725 | 0          | 0        |
| LOC100129726 | 0          | 0        |
| LOC100129727 | 0          | 0        |
| LOC100129728 | 0          | 0        |

|              |            |          |
|--------------|------------|----------|
| LOC100129729 | 0          | 0        |
| LOC100129731 | 0          | 0        |
| LOC100129733 | 0          | 0.179858 |
| LOC100129734 | 0          | 0        |
| LOC100129736 | 0          | 0        |
| LOC100129737 | 0          | 0.012211 |
| LOC100129738 | 0          | 0        |
| LOC100129739 | 0          | 0        |
| LOC100129744 | 0          | 0        |
| LOC100129745 | 0          | 0        |
| LOC100129746 | 0          | 0        |
| LOC100129748 | 0          | 0        |
| LOC100129750 | 0          | 0        |
| LOC100129757 | 0          | 0        |
| LOC100129761 | 0          | 0        |
| LOC100129767 | 0          | 0        |
| LOC100129769 | 0          | 0        |
| LOC100129770 | 0          | 0        |
| LOC100129772 | 0          | 0        |
| LOC100129773 | 0.02748409 | 0        |
| LOC100129774 | 0          | 0        |
| LOC100129776 | 0          | 0        |
| LOC100129777 | 0          | 0        |
| LOC100129778 | 0.05029983 | 0        |
| LOC100129779 | 0          | 0        |
| LOC100129782 | 0          | 0        |
| LOC100129786 | 0          | 0        |
| LOC100129791 | 0.06037758 | 0.052761 |
| LOC100129793 | 0          | 0        |
| LOC100129794 | 0          | 0        |
| LOC100129795 | 0          | 0        |
| LOC100129800 | 0.07910207 | 0.107833 |
| LOC100129802 | 0          | 0.044232 |
| LOC100129810 | 0.04317316 | 0.024523 |
| LOC100129813 | 0          | 0        |
| LOC100129815 | 0          | 0        |
| LOC100129818 | 0          | 0        |
| LOC100129822 | 0          | 0        |
| LOC100129824 | 0          | 0        |
| LOC100129825 | 0          | 0        |
| LOC100129827 | 0.26465452 | 0.267246 |
| LOC100129830 | 0          | 0        |
| LOC100129831 | 0          | 0        |
| LOC100129836 | 0          | 0        |
| LOC100129838 | 0          | 0        |
| LOC100129843 | 0          | 0        |
| LOC100129844 | 0          | 0        |

|              |            |          |
|--------------|------------|----------|
| LOC100129845 | 0          | 0        |
| LOC100129847 | 0          | 0        |
| LOC100129848 | 0.03539618 | 0.060316 |
| LOC100129851 | 0          | 0        |
| LOC100129852 | 0.01257496 | 0.014285 |
| LOC100129853 | 0          | 0        |
| LOC100129854 | 0          | 0        |
| LOC100129857 | 0          | 0        |
| LOC100129859 | 0          | 0        |
| LOC100129860 | 0          | 0        |
| LOC100129861 | 0          | 0        |
| LOC100129863 | 0          | 0        |
| LOC100129866 | 0          | 0        |
| LOC100129869 | 0.02145442 | 0        |
| LOC100129871 | 0          | 0        |
| LOC100129876 | 0          | 0        |
| LOC100129878 | 0          | 0        |
| LOC100129880 | 0          | 0        |
| LOC100129886 | 0          | 0        |
| LOC100129890 | 2.2173607  | 2.305295 |
| LOC100129898 | 0          | 0        |
| LOC100129901 | 0          | 0        |
| LOC100129904 | 0.06643075 | 0.075466 |
| LOC100129906 | 0          | 0        |
| LOC100129907 | 0.36549066 | 0.262234 |
| LOC100129915 | 0          | 0        |
| LOC100129917 | 0.84584665 | 0.366055 |
| LOC100129919 | 0          | 0        |
| LOC100129920 | 0          | 0        |
| LOC100129923 | 0          | 0        |
| LOC100129924 | 0.26718407 | 0.466962 |
| LOC100129925 | 0          | 0        |
| LOC100129927 | 0          | 0        |
| LOC100129929 | 0          | 0        |
| LOC100129932 | 0          | 0        |
| LOC100129933 | 0          | 0        |
| LOC100129935 | 0          | 0        |
| LOC100129937 | 0          | 0        |
| LOC100129941 | 0          | 0        |
| LOC100129942 | 0          | 0        |
| LOC100129945 | 0          | 0        |
| LOC100129947 | 0          | 0        |
| LOC100129948 | 0          | 0        |
| LOC100129949 | 0          | 0        |
| LOC100129950 | 0          | 0        |
| LOC100129954 | 0.00986179 | 0.022406 |
| LOC100129955 | 0          | 0        |

|              |            |          |
|--------------|------------|----------|
| LOC100129956 | 0          | 0        |
| LOC100129957 | 0          | 0        |
| LOC100129958 | 0          | 0        |
| LOC100129959 | 0          | 0        |
| LOC100129960 | 0          | 0        |
| LOC100129962 | 0          | 0        |
| LOC100129966 | 0          | 0        |
| LOC100129967 | 0          | 0        |
| LOC100129969 | 0          | 0        |
| LOC100129972 | 0          | 0        |
| LOC100129976 | 0          | 0        |
| LOC100129979 | 0.07157559 | 0.060983 |
| LOC100129981 | 0          | 0        |
| LOC100129983 | 0          | 0        |
| LOC100129985 | 0          | 0        |
| LOC100129986 | 0.29111997 | 0.171483 |
| LOC100129988 | 0          | 0        |
| LOC100129989 | 0          | 0        |
| LOC100129990 | 0          | 0        |
| LOC100129994 | 0          | 0        |
| LOC100129996 | 0          | 0        |
| LOC100129997 | 0          | 0        |
| LOC100129999 | 0          | 0        |
| LOC100130000 | 0.65093904 | 0.369739 |
| LOC100130001 | 0          | 0        |
| LOC100130002 | 0          | 0        |
| LOC100130003 | 0          | 0        |
| LOC100130004 | 0          | 0        |
| LOC100130005 | 0          | 0        |
| LOC100130006 | 0          | 0        |
| LOC100130007 | 0          | 0        |
| LOC100130009 | 0.06674708 | 0.303303 |
| LOC100130010 | 0          | 0        |
| LOC100130011 | 0          | 0        |
| LOC100130012 | 0          | 0        |
| LOC100130014 | 0          | 0        |
| LOC100130015 | 0          | 0        |
| LOC100130017 | 0          | 0        |
| LOC100130018 | 0          | 0        |
| LOC100130023 | 0          | 0        |
| LOC100130026 | 0          | 0        |
| LOC100130029 | 0          | 0        |
| LOC100130031 | 0          | 0        |
| LOC100130035 | 0          | 0        |
| LOC100130038 | 0          | 0        |
| LOC100130039 | 0          | 0        |
| LOC100130041 | 0          | 0        |

|              |            |          |
|--------------|------------|----------|
| LOC100130042 | 0          | 0        |
| LOC100130043 | 0          | 0        |
| LOC100130044 | 0          | 0        |
| LOC100130048 | 0          | 0        |
| LOC100130049 | 0          | 0        |
| LOC100130052 | 0          | 0        |
| LOC100130054 | 0          | 0        |
| LOC100130059 | 0          | 0        |
| LOC100130063 | 0          | 0        |
| LOC100130064 | 0          | 0        |
| LOC100130067 | 0          | 0        |
| LOC100130071 | 0          | 0        |
| LOC100130072 | 0          | 0        |
| LOC100130073 | 0          | 0        |
| LOC100130074 | 0          | 0        |
| LOC100130075 | 0          | 0        |
| LOC100130079 | 0          | 0        |
| LOC100130084 | 0.00674321 | 0.00383  |
| LOC100130088 | 0          | 0        |
| LOC100130090 | 0          | 0        |
| LOC100130093 | 0          | 0        |
| LOC100130095 | 0          | 0        |
| LOC100130097 | 0.03757879 | 0.192105 |
| LOC100130098 | 0          | 0        |
| LOC100130099 | 0          | 0        |
| LOC100130100 | 0          | 0.041467 |
| LOC100130102 | 0          | 0        |
| LOC100130103 | 0          | 0        |
| LOC100130105 | 0          | 0        |
| LOC100130107 | 0.21261571 | 0.617256 |
| LOC100130109 | 0.04855735 | 0.110324 |
| LOC100130110 | 0          | 0        |
| LOC100130111 | 0          | 0        |
| LOC100130114 | 0          | 0        |
| LOC100130117 | 0          | 0        |
| LOC100130119 | 0          | 0        |
| LOC100130120 | 0          | 0        |
| LOC100130121 | 0          | 0        |
| LOC100130122 | 0          | 0        |
| LOC100130124 | 0          | 0        |
| LOC100130126 | 0          | 0        |
| LOC100130128 | 0.02553167 | 0.058009 |
| LOC100130129 | 0          | 0        |
| LOC100130131 | 0          | 0        |
| LOC100130134 | 0          | 0        |
| LOC100130135 | 0.38112382 | 0.360802 |
| LOC100130137 | 0          | 0        |

|              |            |          |
|--------------|------------|----------|
| LOC100130138 | 0.03229698 | 0        |
| LOC100130139 | 0          | 0        |
| LOC100130142 | 0          | 0        |
| LOC100130148 | 0          | 0        |
| LOC100130149 | 0          | 0        |
| LOC100130153 | 0          | 0        |
| LOC100130155 | 0.01534696 | 0.017434 |
| LOC100130156 | 0          | 0        |
| LOC100130157 | 0          | 0        |
| LOC100130158 | 0          | 0        |
| LOC100130161 | 0          | 0        |
| LOC100130167 | 0          | 0        |
| LOC100130169 | 0          | 0        |
| LOC100130170 | 0          | 0        |
| LOC100130171 | 0          | 0        |
| LOC100130172 | 0.1029644  | 0.198848 |
| LOC100130174 | 0.41291786 | 0.405692 |
| LOC100130176 | 0.29201849 | 0        |
| LOC100130177 | 0          | 0        |
| LOC100130178 | 0          | 0        |
| LOC100130179 | 0          | 0        |
| LOC100130180 | 0          | 0        |
| LOC100130187 | 0          | 0        |
| LOC100130190 | 0          | 0        |
| LOC100130196 | 0          | 0        |
| LOC100130203 | 0          | 0        |
| LOC100130204 | 0          | 0        |
| LOC100130207 | 0          | 0        |
| LOC100130209 | 0          | 0        |
| LOC100130210 | 0          | 0        |
| LOC100130211 | 0          | 0        |
| LOC100130215 | 0          | 0        |
| LOC100130217 | 0          | 0        |
| LOC100130218 | 0          | 0        |
| LOC100130219 | 0          | 0        |
| LOC100130228 | 0          | 0        |
| LOC100130233 | 0          | 0        |
| LOC100130234 | 0          | 0        |
| LOC100130235 | 0          | 0        |
| LOC100130238 | 0          | 0        |
| LOC100130241 | 0          | 0        |
| LOC100130242 | 0          | 0        |
| LOC100130247 | 0          | 0        |
| LOC100130251 | 0          | 0        |
| LOC100130253 | 0          | 0        |
| LOC100130255 | 0          | 0        |
| LOC100130259 | 0          | 0        |



|              |            |          |
|--------------|------------|----------|
| LOC100130260 | 0          | 0        |
| LOC100130262 | 0.04636236 | 0.026334 |
| LOC100130263 | 0          | 0.04656  |
| LOC100130264 | 0          | 0        |
| LOC100130265 | 0          | 0        |
| LOC100130270 | 0          | 0        |
| LOC100130274 | 0.02253519 | 0        |
| LOC100130279 | 0          | 0        |
| LOC100130280 | 0          | 0        |
| LOC100130285 | 0          | 0        |
| LOC100130288 | 0.05990123 | 0.136097 |
| LOC100130289 | 0          | 0        |
| LOC100130292 | 0          | 0        |
| LOC100130297 | 0          | 0        |
| LOC100130298 | 0.0466711  | 0.02651  |
| LOC100130299 | 0          | 0        |
| LOC100130301 | 0          | 0        |
| LOC100130307 | 0          | 0        |
| LOC100130310 | 0          | 0        |
| LOC100130311 | 0.00682198 | 0.0155   |
| LOC100130316 | 0          | 0        |
| LOC100130319 | 0          | 0        |
| LOC100130321 | 0          | 0        |
| LOC100130325 | 0.13190295 | 0.059938 |
| LOC100130326 | 0          | 0        |
| LOC100130327 | 0          | 0        |
| LOC100130329 | 0          | 0        |
| LOC100130331 | 0          | 0        |
| LOC100130333 | 0          | 0        |
| LOC100130335 | 0          | 0        |
| LOC100130338 | 0          | 0        |
| LOC100130342 | 0          | 0        |
| LOC100130345 | 0          | 0.015892 |
| LOC100130348 | 0.08495083 | 0.096505 |
| LOC100130350 | 0          | 0        |
| LOC100130353 | 0          | 0        |
| LOC100130354 | 0          | 0        |
| LOC100130357 | 1.60610167 | 1.492819 |
| LOC100130359 | 0          | 0        |
| LOC100130360 | 0.51490606 | 0.658059 |
| LOC100130363 | 0.04641353 | 0.052727 |
| LOC100130368 | 0          | 0        |
| LOC100130370 | 0.02727021 | 0        |
| LOC100130376 | 0          | 0        |
| LOC100130379 | 0          | 0        |
| LOC100130383 | 0          | 0        |
| LOC100130384 | 0          | 0        |

|              |            |          |
|--------------|------------|----------|
| LOC100130386 | 0.01034711 | 0        |
| LOC100130387 | 1.43066421 | 0.761196 |
| LOC100130388 | 0          | 0        |
| LOC100130391 | 0          | 0        |
| LOC100130394 | 0          | 0        |
| LOC100130396 | 0          | 0        |
| LOC100130402 | 0          | 0        |
| LOC100130403 | 0          | 0        |
| LOC100130404 | 0          | 0        |
| LOC100130405 | 0          | 0        |
| LOC100130409 | 0          | 0        |
| LOC100130420 | 0.12742625 | 0.193011 |
| LOC100130426 | 0          | 0        |
| LOC100130431 | 0.40433329 | 0.489951 |
| LOC100130437 | 0          | 0        |
| LOC100130441 | 0          | 0        |
| LOC100130448 | 0          | 0        |
| LOC100130452 | 0          | 0        |
| LOC100130454 | 0          | 0.010173 |
| LOC100130455 | 0          | 0        |
| LOC100130458 | 0.00748765 | 0.017012 |
| LOC100130459 | 0          | 0        |
| LOC100130461 | 0          | 0        |
| LOC100130462 | 0          | 0        |
| LOC100130465 | 0.01268114 | 0.014406 |
| LOC100130466 | 0          | 0        |
| LOC100130467 | 0.03802049 | 0        |
| LOC100130471 | 0          | 0        |
| LOC100130472 | 0          | 0        |
| LOC100130474 | 0          | 0        |
| LOC100130480 | 0.0349258  | 0        |
| LOC100130481 | 0          | 0        |
| LOC100130483 | 0          | 0        |
| LOC100130484 | 0          | 0        |
| LOC100130485 | 0          | 0        |
| LOC100130487 | 0          | 0        |
| LOC100130488 | 0          | 0        |
| LOC100130490 | 0          | 0        |
| LOC100130494 | 0.20412943 | 0.077298 |
| LOC100130497 | 0          | 0        |
| LOC100130499 | 0          | 0        |
| LOC100130500 | 0          | 0        |
| LOC100130501 | 0          | 0        |
| LOC100130502 | 0          | 0        |
| LOC100130503 | 0          | 0        |
| LOC100130505 | 0          | 0        |
| LOC100130512 | 0          | 0        |

|              |            |          |
|--------------|------------|----------|
| LOC100130514 | 0          | 0        |
| LOC100130518 | 0          | 0.066905 |
| LOC100130520 | 0          | 0.015745 |
| LOC100130522 | 0.01137119 | 0.012918 |
| LOC100130527 | 0          | 0        |
| LOC100130528 | 0          | 0        |
| LOC100130530 | 0          | 0        |
| LOC100130531 | 0          | 0        |
| LOC100130532 | 0          | 0        |
| LOC100130535 | 0          | 0        |
| LOC100130539 | 0          | 0        |
| LOC100130545 | 0          | 0        |
| LOC100130549 | 0          | 0        |
| LOC100130550 | 0          | 0        |
| LOC100130551 | 0          | 0        |
| LOC100130557 | 0          | 0        |
| LOC100130563 | 0          | 0        |
| LOC100130564 | 0          | 0        |
| LOC100130566 | 0          | 0        |
| LOC100130571 | 0          | 0        |
| LOC100130572 | 0          | 0        |
| LOC100130574 | 0          | 0        |
| LOC100130576 | 0          | 0        |
| LOC100130577 | 0          | 0        |
| LOC100130579 | 0          | 0        |
| LOC100130581 | 0          | 0        |
| LOC100130582 | 0          | 0        |
| LOC100130584 | 0          | 0        |
| LOC100130589 | 0          | 0        |
| LOC100130593 | 0          | 0        |
| LOC100130599 | 0          | 0        |
| LOC100130600 | 0.03526261 | 0.030044 |
| LOC100130601 | 0          | 0        |
| LOC100130602 | 0          | 0        |
| LOC100130603 | 0          | 0        |
| LOC100130606 | 0          | 0        |
| LOC100130607 | 0          | 0        |
| LOC100130612 | 0          | 0        |
| LOC100130617 | 0          | 0        |
| LOC100130618 | 0          | 0        |
| LOC100130620 | 0          | 0        |
| LOC100130621 | 0          | 0        |
| LOC100130626 | 0          | 0        |
| LOC100130628 | 0          | 0        |
| LOC100130629 | 0          | 0        |
| LOC100130631 | 0          | 0        |
| LOC100130632 | 0          | 0        |

|              |            |          |
|--------------|------------|----------|
| LOC100130633 | 6.95540678 | 6.584544 |
| LOC100130635 | 0          | 0        |
| LOC100130636 | 0          | 0        |
| LOC100130637 | 0          | 0        |
| LOC100130639 | 0          | 0        |
| LOC100130640 | 0          | 0        |
| LOC100130649 | 0          | 0        |
| LOC100130652 | 0.04426385 | 0        |
| LOC100130655 | 0.02267126 | 0.005151 |
| LOC100130659 | 0          | 0        |
| LOC100130660 | 0          | 0        |
| LOC100130663 | 0.27394568 | 0.194504 |
| LOC100130664 | 0          | 0        |
| LOC100130667 | 0          | 0        |
| LOC100130669 | 0          | 0        |
| LOC100130670 | 0          | 0        |
| LOC100130671 | 0          | 0        |
| LOC100130673 | 0          | 0        |
| LOC100130674 | 0          | 0        |
| LOC100130680 | 0          | 0        |
| LOC100130682 | 0          | 0        |
| LOC100130683 | 0          | 0        |
| LOC100130684 | 0          | 0        |
| LOC100130691 | 0          | 0        |
| LOC100130692 | 0.01121949 | 0        |
| LOC100130693 | 0          | 0        |
| LOC100130697 | 0          | 0        |
| LOC100130698 | 0          | 0        |
| LOC100130699 | 0          | 0        |
| LOC100130700 | 0          | 0        |
| LOC100130701 | 0          | 0        |
| LOC100130704 | 0          | 0        |
| LOC100130705 | 0.28033775 | 0.398085 |
| LOC100130708 | 0          | 0        |
| LOC100130710 | 0.03573711 | 0.054131 |
| LOC100130711 | 0.00925004 | 0.010508 |
| LOC100130714 | 0          | 0        |
| LOC100130719 | 0          | 0        |
| LOC100130721 | 0          | 0        |
| LOC100130724 | 0          | 0        |
| LOC100130731 | 0          | 0        |
| LOC100130736 | 0          | 0        |
| LOC100130738 | 0          | 0        |
| LOC100130746 | 0          | 0        |
| LOC100130747 | 0          | 0        |
| LOC100130748 | 0          | 0        |
| LOC100130756 | 0          | 0        |

|              |            |          |
|--------------|------------|----------|
| LOC100130760 | 0          | 0        |
| LOC100130764 | 0          | 0        |
| LOC100130766 | 0          | 0        |
| LOC100130767 | 0          | 0        |
| LOC100130776 | 0          | 0        |
| LOC100130783 | 0          | 0        |
| LOC100130785 | 0          | 0        |
| LOC100130794 | 0.06549947 | 0.074408 |
| LOC100130798 | 0          | 0        |
| LOC100130799 | 0          | 0        |
| LOC100130800 | 0          | 0        |
| LOC100130801 | 0          | 0        |
| LOC100130803 | 0          | 0        |
| LOC100130814 | 0          | 0        |
| LOC100130815 | 0          | 0        |
| LOC100130819 | 0          | 0.04327  |
| LOC100130820 | 0          | 0        |
| LOC100130821 | 0          | 0        |
| LOC100130825 | 0          | 0        |
| LOC100130826 | 0          | 0        |
| LOC100130827 | 0          | 0        |
| LOC100130828 | 0.11489252 | 0        |
| LOC100130830 | 0.11036919 | 0.062691 |
| LOC100130837 | 2.07109681 | 2.100713 |
| LOC100130840 | 0          | 0        |
| LOC100130841 | 0          | 0        |
| LOC100130842 | 0          | 0        |
| LOC100130843 | 0          | 0        |
| LOC100130846 | 0          | 0        |
| LOC100130849 | 0.06313913 | 0        |
| LOC100130854 | 0          | 0        |
| LOC100130855 | 0          | 0        |
| LOC100130856 | 0          | 0        |
| LOC100130859 | 0          | 0        |
| LOC100130861 | 0          | 0        |
| LOC100130866 | 0          | 0        |
| LOC100130871 | 0          | 0        |
| LOC100130872 | 0          | 0        |
| LOC100130877 | 0          | 0        |
| LOC100130879 | 0          | 0        |
| LOC100130880 | 0          | 0        |
| LOC100130881 | 0          | 0        |
| LOC100130882 | 0.04236131 | 0.032082 |
| LOC100130884 | 0          | 0.100358 |
| LOC100130887 | 0.09344592 | 0.159234 |
| LOC100130890 | 0.17233878 | 0.09789  |
| LOC100130891 | 0          | 0        |

|              |            |          |
|--------------|------------|----------|
| LOC100130894 | 0          | 0        |
| LOC100130896 | 0          | 0        |
| LOC100130897 | 0.05082675 | 0.019247 |
| LOC100130898 | 0          | 0        |
| LOC100130902 | 0          | 0        |
| LOC100130905 | 0.13506637 | 0.17901  |
| LOC100130906 | 0          | 0.039028 |
| LOC100130907 | 0          | 0        |
| LOC100130909 | 0          | 0        |
| LOC100130911 | 0          | 0        |
| LOC100130921 | 0          | 0        |
| LOC100130923 | 0          | 0        |
| LOC100130932 | 0          | 0        |
| LOC100130935 | 0          | 0        |
| LOC100130936 | 0          | 0        |
| LOC100130938 | 0          | 0        |
| LOC100130943 | 0          | 0        |
| LOC100130958 | 2.10972534 | 2.042626 |
| LOC100130962 | 0          | 0        |
| LOC100130963 | 0          | 0        |
| LOC100130967 | 0          | 0        |
| LOC100130968 | 0          | 0        |
| LOC100130970 | 0          | 0        |
| LOC100130972 | 0          | 0        |
| LOC100130982 | 0.06459395 | 0.03669  |
| LOC100130987 | 0          | 0        |
| LOC100130988 | 0          | 0        |
| LOC100130990 | 0          | 0        |
| LOC100130992 | 0.10706201 | 0.093557 |
| LOC100130994 | 0          | 0        |
| LOC100130995 | 0          | 0        |
| LOC100130996 | 0.08871448 | 0.050391 |
| LOC100131001 | 0.00770441 | 0        |
| LOC100131011 | 0          | 0        |
| LOC100131012 | 0          | 0        |
| LOC100131013 | 0          | 0        |
| LOC100131014 | 0.03144367 | 0        |
| LOC100131016 | 0          | 0        |
| LOC100131021 | 0          | 0        |
| LOC100131026 | 0          | 0        |
| LOC100131029 | 0          | 0        |
| LOC100131031 | 0.00716854 | 0        |
| LOC100131033 | 0          | 0        |
| LOC100131035 | 0          | 0        |
| LOC100131036 | 0          | 0        |
| LOC100131038 | 0          | 0        |
| LOC100131041 | 0          | 0        |

|              |            |          |
|--------------|------------|----------|
| LOC100131046 | 0          | 0        |
| LOC100131051 | 0          | 0        |
| LOC100131052 | 0          | 0        |
| LOC100131060 | 0          | 0        |
| LOC100131061 | 0          | 0        |
| LOC100131065 | 0          | 0        |
| LOC100131069 | 0          | 0        |
| LOC100131070 | 0          | 0        |
| LOC100131072 | 0          | 0        |
| LOC100131076 | 0.06355264 | 0.024066 |
| LOC100131078 | 0          | 0        |
| LOC100131080 | 0          | 0        |
| LOC100131082 | 0.0825602  | 0.125053 |
| LOC100131091 | 0.28825051 | 0.288933 |
| LOC100131092 | 0          | 0        |
| LOC100131094 | 0          | 0        |
| LOC100131102 | 0          | 0.023861 |
| LOC100131103 | 0          | 0        |
| LOC100131107 | 0          | 0        |
| LOC100131109 | 0.01270413 | 0        |
| LOC100131114 | 0          | 0        |
| LOC100131116 | 0          | 0        |
| LOC100131118 | 0          | 0        |
| LOC100131124 | 0          | 0        |
| LOC100131126 | 0          | 0        |
| LOC100131127 | 0          | 0        |
| LOC100131128 | 0.05990123 | 0        |
| LOC100131130 | 0          | 0        |
| LOC100131131 | 0          | 0        |
| LOC100131132 | 0          | 0        |
| LOC100131135 | 0          | 0        |
| LOC100131138 | 0          | 0        |
| LOC100131141 | 0          | 0        |
| LOC100131146 | 0          | 0        |
| LOC100131147 | 0          | 0        |
| LOC100131156 | 0          | 0        |
| LOC100131158 | 0          | 0        |
| LOC100131159 | 0          | 0        |
| LOC100131172 | 0          | 0        |
| LOC100131174 | 0          | 0        |
| LOC100131176 | 0          | 0        |
| LOC100131180 | 0.03840243 | 0.027266 |
| LOC100131181 | 0          | 0        |
| LOC100131183 | 0          | 0        |
| LOC100131188 | 0          | 0        |
| LOC100131189 | 0          | 0        |
| LOC100131192 | 0          | 0        |

|              |            |          |
|--------------|------------|----------|
| LOC100131193 | 0          | 0        |
| LOC100131199 | 0          | 0        |
| LOC100131200 | 0          | 0        |
| LOC100131203 | 0          | 0        |
| LOC100131207 | 0          | 0        |
| LOC100131216 | 0          | 0        |
| LOC100131223 | 0          | 0        |
| LOC100131225 | 18.1548949 | 16.87565 |
| LOC100131233 | 0          | 0        |
| LOC100131234 | 0          | 0        |
| LOC100131236 | 0          | 0        |
| LOC100131241 | 0          | 0        |
| LOC100131244 | 0.14715892 | 0.271659 |
| LOC100131250 | 0          | 0        |
| LOC100131251 | 0.00949654 | 0.010788 |
| LOC100131252 | 0          | 0        |
| LOC100131254 | 0          | 0        |
| LOC100131257 | 0.01645175 | 0.037379 |
| LOC100131259 | 0          | 0        |
| LOC100131261 | 0.12460686 | 0.075496 |
| LOC100131264 | 0          | 0        |
| LOC100131268 | 0          | 0        |
| LOC100131269 | 0          | 0        |
| LOC100131273 | 0          | 0        |
| LOC100131276 | 0          | 0        |
| LOC100131279 | 0          | 0        |
| LOC100131280 | 0          | 0        |
| LOC100131281 | 0          | 0        |
| LOC100131283 | 0          | 0        |
| LOC100131284 | 0          | 0        |
| LOC100131285 | 0          | 0        |
| LOC100131289 | 0          | 0.028847 |
| LOC100131291 | 0          | 0        |
| LOC100131293 | 0.03234666 | 0.036746 |
| LOC100131294 | 0.26154524 | 0.412666 |
| LOC100131296 | 0.67923242 | 0.280589 |
| LOC100131297 | 0          | 0        |
| LOC100131302 | 0          | 0        |
| LOC100131303 | 0.07816108 | 0.177584 |
| LOC100131306 | 0          | 0        |
| LOC100131309 | 0          | 0        |
| LOC100131311 | 0          | 0.024029 |
| LOC100131315 | 0          | 0.041252 |
| LOC100131316 | 0.0512813  | 0.029128 |
| LOC100131326 | 1.09113494 | 1.048847 |
| LOC100131327 | 0          | 0        |
| LOC100131328 | 0          | 0        |



|              |            |          |
|--------------|------------|----------|
| LOC100131340 | 0          | 0        |
| LOC100131341 | 0          | 0        |
| LOC100131342 | 0.02245496 | 0        |
| LOC100131343 | 0          | 0        |
| LOC100131347 | 0.0398207  | 0.045237 |
| LOC100131348 | 0          | 0        |
| LOC100131354 | 0.03469527 | 0.009854 |
| LOC100131356 | 0          | 0        |
| LOC100131360 | 0          | 0        |
| LOC100131361 | 0          | 0        |
| LOC100131369 | 0          | 0        |
| LOC100131373 | 0          | 0        |
| LOC100131381 | 0.0235446  | 0.026747 |
| LOC100131386 | 0          | 0        |
| LOC100131388 | 0          | 0        |
| LOC100131389 | 0          | 0        |
| LOC100131393 | 0          | 0        |
| LOC100131397 | 0          | 0        |
| LOC100131399 | 0          | 0        |
| LOC100131403 | 0          | 0        |
| LOC100131408 | 0          | 0        |
| LOC100131409 | 0          | 0        |
| LOC100131411 | 0          | 0        |
| LOC100131414 | 0          | 0.040415 |
| LOC100131415 | 0          | 0        |
| LOC100131416 | 0.03637601 | 0        |
| LOC100131425 | 0          | 0        |
| LOC100131426 | 6.29812842 | 7.396853 |
| LOC100131429 | 0          | 0        |
| LOC100131433 | 0          | 0        |
| LOC100131434 | 0          | 0        |
| LOC100131435 | 0.08976332 | 0.109817 |
| LOC100131436 | 0.01292276 | 0        |
| LOC100131440 | 0          | 0        |
| LOC100131441 | 0          | 0        |
| LOC100131442 | 0          | 0        |
| LOC100131448 | 0          | 0        |
| LOC100131450 | 0.13495078 | 0.091984 |
| LOC100131451 | 0          | 0        |
| LOC100131455 | 0.16298706 | 0.056971 |
| LOC100131457 | 0          | 0        |
| LOC100131459 | 0          | 0        |
| LOC100131465 | 0          | 0        |
| LOC100131471 | 0          | 0        |
| LOC100131478 | 0          | 0        |
| LOC100131479 | 0          | 0        |
| LOC100131482 | 0          | 0        |

|              |            |          |
|--------------|------------|----------|
| LOC100131485 | 0          | 0        |
| LOC100131493 | 0          | 0        |
| LOC100131495 | 0          | 0        |
| LOC100131496 | 0          | 0        |
| LOC100131500 | 0          | 0        |
| LOC100131501 | 0          | 0        |
| LOC100131503 | 0          | 0        |
| LOC100131504 | 0.04384845 | 0.024906 |
| LOC100131507 | 0          | 0        |
| LOC100131510 | 0          | 0        |
| LOC100131512 | 0.66560638 | 0.489267 |
| LOC100131519 | 0          | 0        |
| LOC100131520 | 0          | 0        |
| LOC100131521 | 0          | 0        |
| LOC100131524 | 0          | 0        |
| LOC100131528 | 0          | 0        |
| LOC100131529 | 0          | 0        |
| LOC100131530 | 0.03507144 | 0.019921 |
| LOC100131533 | 0          | 0        |
| LOC100131536 | 0          | 0        |
| LOC100131537 | 0          | 0        |
| LOC100131539 | 0.02773059 | 0.018901 |
| LOC100131540 | 0          | 0        |
| LOC100131542 | 0          | 0        |
| LOC100131544 | 0.15713999 | 0.142811 |
| LOC100131546 | 0          | 0        |
| LOC100131550 | 0          | 0        |
| LOC100131551 | 0          | 0        |
| LOC100131552 | 0.14651799 | 0.166447 |
| LOC100131553 | 0          | 0        |
| LOC100131554 | 0          | 0        |
| LOC100131556 | 0          | 0        |
| LOC100131557 | 0          | 0        |
| LOC100131562 | 0          | 0        |
| LOC100131564 | 0          | 0        |
| LOC100131565 | 0          | 0        |
| LOC100131568 | 0          | 0        |
| LOC100131573 | 0          | 0        |
| LOC100131574 | 0          | 0        |
| LOC100131577 | 0          | 0        |
| LOC100131582 | 0          | 0        |
| LOC100131591 | 0          | 0        |
| LOC100131592 | 0          | 0        |
| LOC100131593 | 0          | 0        |
| LOC100131597 | 0          | 0        |
| LOC100131603 | 0          | 0        |
| LOC100131607 | 0          | 0        |

|              |            |          |
|--------------|------------|----------|
| LOC100131608 | 0          | 0        |
| LOC100131611 | 0          | 0        |
| LOC100131616 | 0          | 0        |
| LOC100131617 | 0          | 0        |
| LOC100131621 | 0          | 0.064905 |
| LOC100131623 | 0          | 0        |
| LOC100131624 | 0          | 0        |
| LOC100131625 | 0          | 0        |
| LOC100131629 | 0          | 0        |
| LOC100131630 | 0.03853146 | 0.131317 |
| LOC100131635 | 0          | 0        |
| LOC100131638 | 0          | 0        |
| LOC100131639 | 0          | 0        |
| LOC100131646 | 2.83646961 | 3.181996 |
| LOC100131652 | 0          | 0        |
| LOC100131656 | 0          | 0        |
| LOC100131661 | 0          | 0        |
| LOC100131662 | 0          | 0        |
| LOC100131668 | 0          | 0        |
| LOC100131669 | 0          | 0        |
| LOC100131671 | 0          | 0        |
| LOC100131674 | 0          | 0        |
| LOC100131676 | 0          | 0        |
| LOC100131678 | 0          | 0        |
| LOC100131679 | 0          | 0        |
| LOC100131680 | 0          | 0        |
| LOC100131683 | 0          | 0        |
| LOC100131685 | 0          | 0        |
| LOC100131688 | 0          | 0        |
| LOC100131689 | 0          | 0        |
| LOC100131693 | 0.13865626 | 0.143196 |
| LOC100131694 | 0          | 0        |
| LOC100131699 | 0.21261571 | 0.18786  |
| LOC100131700 | 0          | 0        |
| LOC100131706 | 4.37842516 | 4.519487 |
| LOC100131711 | 0          | 0        |
| LOC100131717 | 0          | 0        |
| LOC100131722 | 0          | 0.01246  |
| LOC100131725 | 0          | 0        |
| LOC100131726 | 0          | 0        |
| LOC100131727 | 0.04445102 | 0        |
| LOC100131733 | 0.30097611 | 0.268646 |
| LOC100131736 | 0          | 0        |
| LOC100131740 | 0          | 0        |
| LOC100131742 | 0          | 0        |
| LOC100131743 | 0          | 0        |
| LOC100131746 | 0          | 0.050711 |

|              |            |          |
|--------------|------------|----------|
| LOC100131747 | 0          | 0        |
| LOC100131750 | 0          | 0        |
| LOC100131754 | 0          | 0        |
| LOC100131755 | 0.33525585 | 0.27204  |
| LOC100131756 | 0          | 0        |
| LOC100131760 | 0          | 0        |
| LOC100131767 | 0          | 0        |
| LOC100131770 | 0          | 0        |
| LOC100131773 | 0.06826406 | 0.077549 |
| LOC100131774 | 0.02714697 | 0        |
| LOC100131775 | 0          | 0        |
| LOC100131777 | 0          | 0        |
| LOC100131778 | 0          | 0        |
| LOC100131779 | 0          | 0        |
| LOC100131784 | 0          | 0        |
| LOC100131785 | 0          | 0        |
| LOC100131789 | 0          | 0        |
| LOC100131792 | 0          | 0        |
| LOC100131800 | 0          | 0        |
| LOC100131801 | 49.2909639 | 42.77769 |
| LOC100131803 | 0          | 0        |
| LOC100131811 | 0          | 0.019954 |
| LOC100131815 | 0          | 0        |
| LOC100131818 | 0          | 0        |
| LOC100131823 | 0          | 0        |
| LOC100131825 | 0          | 0        |
| LOC100131828 | 0          | 0        |
| LOC100131830 | 0.11845257 | 0.100923 |
| LOC100131831 | 1.85064038 | 3.474729 |
| LOC100131832 | 0          | 0        |
| LOC100131834 | 0          | 0        |
| LOC100131836 | 0          | 0        |
| LOC100131842 | 0          | 0        |
| LOC100131849 | 0          | 0        |
| LOC100131850 | 0          | 0        |
| LOC100131851 | 0.0613341  | 0        |
| LOC100131852 | 0          | 0        |
| LOC100131855 | 0          | 0        |
| LOC100131859 | 0          | 0        |
| LOC100131868 | 0          | 0        |
| LOC100131871 | 1.34777763 | 1.837316 |
| LOC100131877 | 0          | 0        |
| LOC100131879 | 0          | 0        |
| LOC100131881 | 0          | 0        |
| LOC100131884 | 0          | 0        |
| LOC100131890 | 0          | 0        |
| LOC100131891 | 0.01175913 | 0        |

|              |            |          |
|--------------|------------|----------|
| LOC100131892 | 0          | 0.08115  |
| LOC100131897 | 0.00592597 | 0        |
| LOC100131899 | 0          | 0        |
| LOC100131901 | 0          | 0        |
| LOC100131909 | 0.55615392 | 0.369834 |
| LOC100131918 | 0          | 0        |
| LOC100131921 | 0          | 0        |
| LOC100131924 | 0          | 0        |
| LOC100131925 | 0          | 0        |
| LOC100131932 | 0          | 0        |
| LOC100131935 | 0          | 0        |
| LOC100131937 | 0          | 0        |
| LOC100131939 | 0          | 0        |
| LOC100131940 | 0          | 0        |
| LOC100131941 | 0          | 0        |
| LOC100131943 | 0          | 0        |
| LOC100131946 | 0          | 0        |
| LOC100131947 | 0          | 0        |
| LOC100131950 | 0          | 0        |
| LOC100131953 | 0          | 0        |
| LOC100131959 | 0          | 0        |
| LOC100131961 | 0          | 0        |
| LOC100131962 | 0          | 0        |
| LOC100131964 | 0          | 0        |
| LOC100131965 | 0          | 0        |
| LOC100131968 | 0          | 0        |
| LOC100131970 | 0          | 0        |
| LOC100131972 | 0.10122236 | 0.147845 |
| LOC100131973 | 0.19358361 | 0.122174 |
| LOC100131977 | 0          | 0        |
| LOC100131979 | 0          | 0        |
| LOC100131981 | 0          | 0        |
| LOC100131983 | 0          | 0        |
| LOC100131988 | 0          | 0        |
| LOC100131992 | 0          | 0        |
| LOC100131995 | 0          | 0        |
| LOC100131998 | 0          | 0        |
| LOC100132004 | 0          | 0        |
| LOC100132009 | 0          | 0        |
| LOC100132010 | 0          | 0        |
| LOC100132013 | 2.05173765 | 1.878223 |
| LOC100132015 | 0          | 0        |
| LOC100132016 | 0          | 0        |
| LOC100132021 | 0          | 0        |
| LOC100132024 | 0.05614241 | 0        |
| LOC100132027 | 0          | 0        |
| LOC100132036 | 0          | 0        |

|              |            |          |
|--------------|------------|----------|
| LOC100132039 | 0          | 0        |
| LOC100132040 | 0          | 0        |
| LOC100132043 | 0          | 0        |
| LOC100132044 | 0          | 0        |
| LOC100132046 | 0          | 0        |
| LOC100132048 | 0          | 0        |
| LOC100132050 | 0.04241829 | 0        |
| LOC100132051 | 0          | 0        |
| LOC100132052 | 0          | 0        |
| LOC100132056 | 0          | 0        |
| LOC100132057 | 0.09375844 | 0.079883 |
| LOC100132058 | 0          | 0        |
| LOC100132062 | 0          | 0.066793 |
| LOC100132065 | 0          | 0        |
| LOC100132066 | 0          | 0        |
| LOC100132068 | 0          | 0        |
| LOC100132070 | 0          | 0        |
| LOC100132073 | 0          | 0        |
| LOC100132076 | 0          | 0        |
| LOC100132079 | 0          | 0        |
| LOC100132081 | 0          | 0        |
| LOC100132082 | 0.16990166 | 0.096505 |
| LOC100132084 | 0.0778716  | 0.044232 |
| LOC100132085 | 0          | 0        |
| LOC100132086 | 0          | 0        |
| LOC100132088 | 0          | 0        |
| LOC100132090 | 0          | 0        |
| LOC100132092 | 0          | 0        |
| LOC100132101 | 0          | 0        |
| LOC100132102 | 0          | 0        |
| LOC100132104 | 0          | 0        |
| LOC100132106 | 0          | 0        |
| LOC100132107 | 0          | 0        |
| LOC100132108 | 0          | 0        |
| LOC100132109 | 0          | 0        |
| LOC100132111 | 0          | 0        |
| LOC100132115 | 0          | 0        |
| LOC100132116 | 0          | 0        |
| LOC100132117 | 0          | 0        |
| LOC100132126 | 0          | 0        |
| LOC100132132 | 0          | 0        |
| LOC100132143 | 0          | 0        |
| LOC100132144 | 0.16555379 | 0.250762 |
| LOC100132146 | 0          | 0        |
| LOC100132147 | 0          | 0        |
| LOC100132153 | 0          | 0        |
| LOC100132154 | 0          | 0        |

|              |            |          |
|--------------|------------|----------|
| LOC100132158 | 0          | 0        |
| LOC100132159 | 0          | 0        |
| LOC100132161 | 0.61935083 | 0.296249 |
| LOC100132163 | 0          | 0        |
| LOC100132166 | 0          | 0        |
| LOC100132167 | 0.16298706 | 0.222187 |
| LOC100132168 | 0.14063767 | 0        |
| LOC100132169 | 0          | 0        |
| LOC100132172 | 0          | 0        |
| LOC100132173 | 0          | 0        |
| LOC100132174 | 0          | 0        |
| LOC100132179 | 0          | 0        |
| LOC100132182 | 0          | 0        |
| LOC100132184 | 0.02107803 | 0.09578  |
| LOC100132195 | 0          | 0        |
| LOC100132200 | 0          | 0        |
| LOC100132201 | 0          | 0        |
| LOC100132202 | 0          | 0        |
| LOC100132212 | 0          | 0        |
| LOC100132213 | 0          | 0        |
| LOC100132214 | 1.52917774 | 1.858733 |
| LOC100132215 | 0          | 0        |
| LOC100132221 | 0          | 0        |
| LOC100132222 | 0          | 0        |
| LOC100132223 | 0          | 0        |
| LOC100132229 | 0          | 0        |
| LOC100132234 | 0          | 0        |
| LOC100132239 | 0          | 0        |
| LOC100132240 | 0          | 0        |
| LOC100132242 | 0          | 0        |
| LOC100132245 | 0          | 0        |
| LOC100132247 | 8.71419271 | 8.335071 |
| LOC100132249 | 0.1651204  | 0.140685 |
| LOC100132251 | 0          | 0        |
| LOC100132253 | 0          | 0        |
| LOC100132257 | 0          | 0        |
| LOC100132258 | 0          | 0        |
| LOC100132260 | 0          | 0        |
| LOC100132261 | 0.01920122 | 0.021813 |
| LOC100132263 | 0.03850793 | 0        |
| LOC100132264 | 0          | 0        |
| LOC100132266 | 0          | 0        |
| LOC100132268 | 0          | 0        |
| LOC100132272 | 0          | 0        |
| LOC100132273 | 0          | 0        |
| LOC100132280 | 0          | 0        |
| LOC100132287 | 1.51692824 | 1.202271 |

|              |            |          |
|--------------|------------|----------|
| LOC100132288 | 1.03877495 | 0.866377 |
| LOC100132289 | 0          | 0        |
| LOC100132293 | 0.01360276 | 0.005151 |
| LOC100132295 | 0          | 0        |
| LOC100132297 | 0          | 0        |
| LOC100132304 | 0.07772766 | 0        |
| LOC100132306 | 0          | 0        |
| LOC100132308 | 0          | 0        |
| LOC100132310 | 0          | 0        |
| LOC100132314 | 0          | 0        |
| LOC100132315 | 0          | 0        |
| LOC100132317 | 0          | 0        |
| LOC100132319 | 0          | 0        |
| LOC100132321 | 0          | 0        |
| LOC100132322 | 0          | 0        |
| LOC100132324 | 0          | 0        |
| LOC100132326 | 0          | 0        |
| LOC100132328 | 0          | 0        |
| LOC100132329 | 0          | 0        |
| LOC100132330 | 0          | 0        |
| LOC100132332 | 0          | 0        |
| LOC100132339 | 0          | 0        |
| LOC100132340 | 0          | 0        |
| LOC100132345 | 0.86247939 | 1.066883 |
| LOC100132346 | 0.06738888 | 0        |
| LOC100132351 | 0          | 0.158705 |
| LOC100132354 | 0          | 0        |
| LOC100132355 | 0          | 0        |
| LOC100132356 | 0          | 0        |
| LOC100132358 | 0          | 0        |
| LOC100132364 | 0.08676203 | 0.164272 |
| LOC100132369 | 1.87000237 | 2.327551 |
| LOC100132379 | 0          | 0        |
| LOC100132380 | 0          | 0        |
| LOC100132383 | 0          | 0        |
| LOC100132384 | 0          | 0        |
| LOC100132385 | 0          | 0        |
| LOC100132388 | 0.97039989 | 1.269418 |
| LOC100132393 | 0          | 0        |
| LOC100132395 | 0          | 0        |
| LOC100132396 | 0          | 0        |
| LOC100132402 | 0          | 0        |
| LOC100132404 | 0          | 0        |
| LOC100132405 | 0.02071461 | 0.023532 |
| LOC100132407 | 0          | 0        |
| LOC100132410 | 0          | 0        |
| LOC100132413 | 0.01752111 | 0        |



|              |            |          |
|--------------|------------|----------|
| LOC100132415 | 0          | 0        |
| LOC100132423 | 0          | 0.036522 |
| LOC100132426 | 0          | 0        |
| LOC100132427 | 0          | 0        |
| LOC100132428 | 0          | 0        |
| LOC100132429 | 1.22279792 | 0.501626 |
| LOC100132432 | 0          | 0        |
| LOC100132433 | 0          | 0        |
| LOC100132439 | 0.06147758 | 0        |
| LOC100132441 | 0          | 0        |
| LOC100132443 | 0          | 0        |
| LOC100132450 | 0          | 0        |
| LOC100132460 | 0          | 0        |
| LOC100132461 | 0          | 0        |
| LOC100132469 | 0.10912802 | 0.123971 |
| LOC100132472 | 0          | 0        |
| LOC100132478 | 0          | 0        |
| LOC100132482 | 0          | 0        |
| LOC100132483 | 0.01097929 | 0        |
| LOC100132484 | 0          | 0        |
| LOC100132485 | 0.03529714 | 0.093562 |
| LOC100132487 | 0          | 0        |
| LOC100132490 | 0          | 0        |
| LOC100132498 | 0          | 0        |
| LOC100132507 | 0          | 0        |
| LOC100132509 | 0          | 0        |
| LOC100132512 | 0          | 0        |
| LOC100132514 | 0          | 0        |
| LOC100132515 | 0          | 0        |
| LOC100132520 | 0          | 0        |
| LOC100132524 | 0          | 0        |
| LOC100132526 | 0.00622604 | 0        |
| LOC100132529 | 0          | 0.073606 |
| LOC100132534 | 0          | 0        |
| LOC100132536 | 0          | 0        |
| LOC100132537 | 0          | 0        |
| LOC100132541 | 0          | 0        |
| LOC100132542 | 0          | 0        |
| LOC100132543 | 0          | 0        |
| LOC100132548 | 0          | 0        |
| LOC100132556 | 0          | 0        |
| LOC100132561 | 0          | 0        |
| LOC100132562 | 0          | 0        |
| LOC100132570 | 0          | 0        |
| LOC100132571 | 0          | 0        |
| LOC100132574 | 0          | 0        |
| LOC100132578 | 0          | 0        |

|              |            |          |
|--------------|------------|----------|
| LOC100132581 | 0          | 0        |
| LOC100132583 | 0          | 0        |
| LOC100132585 | 0.01902745 | 0.010808 |
| LOC100132587 | 0          | 0        |
| LOC100132591 | 0          | 0        |
| LOC100132594 | 0          | 0        |
| LOC100132597 | 0          | 0        |
| LOC100132598 | 0          | 0        |
| LOC100132599 | 0          | 0        |
| LOC100132605 | 0          | 0.013494 |
| LOC100132606 | 0          | 0        |
| LOC100132609 | 0          | 0        |
| LOC100132613 | 0          | 0        |
| LOC100132615 | 0          | 0        |
| LOC100132617 | 0          | 0        |
| LOC100132618 | 0          | 0        |
| LOC100132619 | 0          | 0        |
| LOC100132621 | 0          | 0        |
| LOC100132622 | 0          | 0        |
| LOC100132623 | 0          | 0        |
| LOC100132625 | 0.03114864 | 0.035385 |
| LOC100132626 | 0          | 0        |
| LOC100132628 | 0.0519144  | 0        |
| LOC100132630 | 0          | 0        |
| LOC100132632 | 0.0620445  | 0.079294 |
| LOC100132636 | 0.25392912 | 0.461548 |
| LOC100132641 | 0          | 0        |
| LOC100132644 | 0          | 0        |
| LOC100132646 | 0          | 0        |
| LOC100132647 | 0          | 0        |
| LOC100132648 | 0          | 0        |
| LOC100132649 | 0.03047149 | 0        |
| LOC100132651 | 0          | 0        |
| LOC100132652 | 0          | 0        |
| LOC100132653 | 0          | 0        |
| LOC100132654 | 0          | 0        |
| LOC100132656 | 0          | 0        |
| LOC100132658 | 0          | 0        |
| LOC100132659 | 0          | 0        |
| LOC100132663 | 0          | 0        |
| LOC100132669 | 0          | 0        |
| LOC100132670 | 0          | 0        |
| LOC100132672 | 0          | 0        |
| LOC100132676 | 0          | 0        |
| LOC100132677 | 0          | 0        |
| LOC100132679 | 0          | 0        |
| LOC100132680 | 0          | 0        |

|              |            |          |
|--------------|------------|----------|
| LOC100132681 | 0          | 0        |
| LOC100132683 | 0          | 0        |
| LOC100132686 | 0          | 0        |
| LOC100132698 | 0          | 0        |
| LOC100132699 | 0          | 0        |
| LOC100132701 | 0          | 0        |
| LOC100132705 | 0          | 0        |
| LOC100132707 | 0          | 0        |
| LOC100132710 | 0          | 0        |
| LOC100132712 | 0          | 0        |
| LOC100132713 | 0          | 0        |
| LOC100132715 | 0          | 0        |
| LOC100132723 | 0          | 0        |
| LOC100132726 | 0          | 0        |
| LOC100132729 | 0          | 0        |
| LOC100132733 | 0.27435189 | 0.155834 |
| LOC100132736 | 0          | 0        |
| LOC100132738 | 0.04892456 | 0        |
| LOC100132751 | 0          | 0        |
| LOC100132752 | 0          | 0        |
| LOC100132753 | 0          | 0        |
| LOC100132759 | 0          | 0        |
| LOC100132762 | 0          | 0        |
| LOC100132766 | 0          | 0        |
| LOC100132767 | 0.24006087 | 0.318165 |
| LOC100132769 | 0          | 0        |
| LOC100132771 | 0.0336495  | 0.05734  |
| LOC100132772 | 0          | 0        |
| LOC100132778 | 0          | 0        |
| LOC100132779 | 0.0153919  | 0.020983 |
| LOC100132780 | 0          | 0        |
| LOC100132781 | 0.17742895 | 0.403124 |
| LOC100132782 | 0          | 0        |
| LOC100132785 | 0          | 0        |
| LOC100132789 | 0          | 0        |
| LOC100132790 | 0.03850793 | 0.043746 |
| LOC100132796 | 0          | 0        |
| LOC100132797 | 0          | 0        |
| LOC100132799 | 0.02900046 | 0        |
| LOC100132803 | 0          | 0        |
| LOC100132805 | 0.15574319 | 0.157268 |
| LOC100132808 | 0          | 0        |
| LOC100132812 | 0          | 0        |
| LOC100132813 | 0          | 0        |
| LOC100132814 | 0          | 0        |
| LOC100132815 | 0.15913212 | 0.180777 |
| LOC100132816 | 1.76279452 | 1.626324 |

|              |            |          |
|--------------|------------|----------|
| LOC100132817 | 0          | 0        |
| LOC100132822 | 0          | 0        |
| LOC100132824 | 0          | 0        |
| LOC100132826 | 0.03098796 | 0.070406 |
| LOC100132827 | 0          | 0        |
| LOC100132829 | 0.01097355 | 0.012466 |
| LOC100132830 | 0          | 0        |
| LOC100132831 | 0          | 0        |
| LOC100132832 | 0.38768835 | 0.256058 |
| LOC100132834 | 0          | 0        |
| LOC100132835 | 0          | 0        |
| LOC100132836 | 0          | 0        |
| LOC100132838 | 0          | 0        |
| LOC100132839 | 0.01654235 | 0.006264 |
| LOC100132840 | 0          | 0        |
| LOC100132841 | 0          | 0        |
| LOC100132842 | 0          | 0        |
| LOC100132843 | 0          | 0        |
| LOC100132848 | 0          | 0        |
| LOC100132849 | 0          | 0        |
| LOC100132856 | 0          | 0        |
| LOC100132857 | 0          | 0        |
| LOC100132858 | 4.53273369 | 5.314695 |
| LOC100132859 | 0.27592298 | 0        |
| LOC100132863 | 0          | 0        |
| LOC100132864 | 0.43802773 | 0.217703 |
| LOC100132865 | 0          | 0        |
| LOC100132870 | 0.15317143 | 0.081202 |
| LOC100132871 | 0          | 0        |
| LOC100132875 | 0          | 0        |
| LOC100132878 | 0          | 0        |
| LOC100132883 | 0          | 0        |
| LOC100132884 | 0          | 0        |
| LOC100132885 | 0          | 0        |
| LOC100132887 | 0          | 0        |
| LOC100132889 | 0          | 0        |
| LOC100132891 | 0.01352981 | 0.03074  |
| LOC100132893 | 0.25278757 | 0.287171 |
| LOC100132900 | 0          | 0        |
| LOC100132905 | 0          | 0        |
| LOC100132909 | 0.15422003 | 0.087598 |
| LOC100132913 | 0.63934542 | 0.809313 |
| LOC100132915 | 0          | 0        |
| LOC100132917 | 0          | 0        |
| LOC100132918 | 0          | 0        |
| LOC100132919 | 0          | 0        |
| LOC100132920 | 0          | 0        |

|              |            |          |
|--------------|------------|----------|
| LOC100132926 | 0          | 0        |
| LOC100132930 | 0          | 0        |
| LOC100132934 | 0          | 0        |
| LOC100132938 | 0          | 0        |
| LOC100132939 | 0.14206305 | 0.107591 |
| LOC100132940 | 0          | 0        |
| LOC100132941 | 0.21594644 | 0.312224 |
| LOC100132944 | 0.17904783 | 0.290573 |
| LOC100132946 | 0          | 0        |
| LOC100132947 | 0          | 0        |
| LOC100132949 | 0          | 0        |
| LOC100132952 | 0          | 0        |
| LOC100132955 | 0.11685733 | 0.102117 |
| LOC100132958 | 0          | 0        |
| LOC100132965 | 0          | 0        |
| LOC100132966 | 0          | 0        |
| LOC100132972 | 0          | 0        |
| LOC100132973 | 0          | 0        |
| LOC100132977 | 0          | 0        |
| LOC100132983 | 0          | 0        |
| LOC100132984 | 0          | 0        |
| LOC100132987 | 0          | 0        |
| LOC100132992 | 0.11489252 | 0.13052  |
| LOC100132999 | 0.72155569 | 0.888007 |
| LOC100133001 | 0          | 0        |
| LOC100133002 | 0          | 0        |
| LOC100133005 | 0          | 0        |
| LOC100133007 | 0          | 0        |
| LOC100133008 | 0          | 0        |
| LOC100133009 | 0          | 0        |
| LOC100133016 | 0          | 0        |
| LOC100133017 | 0          | 0        |
| LOC100133019 | 0          | 0        |
| LOC100133023 | 0          | 0        |
| LOC100133024 | 0          | 0        |
| LOC100133029 | 0          | 0        |
| LOC100133030 | 0          | 0        |
| LOC100133034 | 0          | 0        |
| LOC100133040 | 0          | 0        |
| LOC100133042 | 0.10391432 | 0.039349 |
| LOC100133044 | 0          | 0        |
| LOC100133047 | 0          | 0        |
| LOC100133049 | 0          | 0        |
| LOC100133050 | 0          | 0        |
| LOC100133053 | 0          | 0        |
| LOC100133058 | 0          | 0        |
| LOC100133059 | 0          | 0        |

|              |            |          |
|--------------|------------|----------|
| LOC100133060 | 0          | 0        |
| LOC100133062 | 0          | 0        |
| LOC100133063 | 0          | 0        |
| LOC100133064 | 0          | 0        |
| LOC100133065 | 0          | 0        |
| LOC100133069 | 0          | 0        |
| LOC100133070 | 0.06055683 | 0.013759 |
| LOC100133073 | 0          | 0        |
| LOC100133075 | 0          | 0        |
| LOC100133076 | 0          | 0        |
| LOC100133078 | 0          | 0        |
| LOC100133079 | 0          | 0        |
| LOC100133080 | 0          | 0        |
| LOC100133083 | 0          | 0        |
| LOC100133084 | 0          | 0        |
| LOC100133086 | 0          | 0.010867 |
| LOC100133087 | 0          | 0        |
| LOC100133088 | 0          | 0        |
| LOC100133091 | 0          | 0        |
| LOC100133092 | 0          | 0        |
| LOC100133097 | 0          | 0        |
| LOC100133099 | 0          | 0.012869 |
| LOC100133102 | 0          | 0        |
| LOC100133103 | 0          | 0        |
| LOC100133109 | 6.91110416 | 9.80469  |
| LOC100133111 | 0          | 0        |
| LOC100133112 | 0          | 0        |
| LOC100133113 | 0          | 0        |
| LOC100133116 | 0          | 0        |
| LOC100133117 | 0          | 0        |
| LOC100133122 | 0          | 0        |
| LOC100133124 | 0          | 0        |
| LOC100133127 | 0          | 0        |
| LOC100133128 | 0          | 0        |
| LOC100133130 | 0.50277965 | 0.493279 |
| LOC100133134 | 0          | 0        |
| LOC100133137 | 0          | 0        |
| LOC100133141 | 0          | 0        |
| LOC100133142 | 13.6641181 | 15.79898 |
| LOC100133144 | 0          | 0        |
| LOC100133147 | 0          | 0        |
| LOC100133150 | 0          | 0        |
| LOC100133153 | 0.06209489 | 0.056433 |
| LOC100133156 | 0          | 0        |
| LOC100133160 | 0          | 0        |
| LOC100133161 | 0.75492021 | 0.821108 |
| LOC100133163 | 0          | 0        |

|              |            |          |
|--------------|------------|----------|
| LOC100133165 | 0.02316841 | 0        |
| LOC100133167 | 0          | 0        |
| LOC100133168 | 0          | 0        |
| LOC100133173 | 0          | 0        |
| LOC100133174 | 0          | 0        |
| LOC100133176 | 0.12515078 | 0.568693 |
| LOC100133177 | 0          | 0        |
| LOC100133178 | 0          | 0        |
| LOC100133180 | 0          | 0        |
| LOC100133183 | 0          | 0        |
| LOC100133189 | 0          | 0        |
| LOC100133195 | 0          | 0        |
| LOC100133203 | 0          | 0        |
| LOC100133206 | 0          | 0        |
| LOC100133210 | 0          | 0        |
| LOC100133211 | 0          | 0        |
| LOC100133212 | 0          | 0        |
| LOC100133214 | 0.0398207  | 0        |
| LOC100133218 | 0          | 0        |
| LOC100133220 | 4.33203977 | 3.973781 |
| LOC100133224 | 0          | 0.024958 |
| LOC100133225 | 0          | 0        |
| LOC100133226 | 0          | 0        |
| LOC100133239 | 0          | 0        |
| LOC100133244 | 0          | 0        |
| LOC100133251 | 0          | 0        |
| LOC100133252 | 0          | 0        |
| LOC100133258 | 0          | 0        |
| LOC100133259 | 0          | 0        |
| LOC100133261 | 0          | 0        |
| LOC100133262 | 0          | 0        |
| LOC100133263 | 0.86881533 | 0.888289 |
| LOC100133264 | 0.18223472 | 0.155266 |
| LOC100133267 | 0.08760555 | 0        |
| LOC100133268 | 0          | 0        |
| LOC100133270 | 0.01099076 | 0        |
| LOC100133280 | 0.00353189 | 0        |
| LOC100133284 | 0.05475347 | 0        |
| LOC100133285 | 0          | 0        |
| LOC100133286 | 0.77685967 | 1.053336 |
| LOC100133291 | 0          | 0        |
| LOC100133295 | 0          | 0        |
| LOC100133300 | 0          | 0        |
| LOC100133301 | 0.28858297 | 0.093667 |
| LOC100133302 | 0          | 0        |
| LOC100133305 | 0.61052075 | 0.589052 |
| LOC100133307 | 0          | 0        |

|              |            |          |
|--------------|------------|----------|
| LOC100133308 | 0          | 0        |
| LOC100133309 | 0          | 0        |
| LOC100133310 | 0          | 0        |
| LOC100133311 | 0.04590684 | 0.026075 |
| LOC100133312 | 0          | 0        |
| LOC100133314 | 0          | 0        |
| LOC100133315 | 0.26010719 | 0.295486 |
| LOC100133316 | 0          | 0        |
| LOC100133317 | 0          | 0        |
| LOC100133321 | 0          | 0        |
| LOC100133326 | 0          | 0        |
| LOC100133328 | 0          | 0        |
| LOC100133330 | 0          | 0        |
| LOC100133331 | 0          | 0        |
| LOC100133337 | 18.787566  | 20.28223 |
| LOC100133545 | 0          | 0        |
| LOC100133612 | 0          | 0        |
| LOC100133669 | 0          | 0        |
| LOC100133920 | 0          | 0        |
| LOC100133985 | 0          | 0        |
| LOC100133991 | 0          | 0        |
| LOC100134229 | 0          | 0        |
| LOC100134257 | 0          | 0        |
| LOC100134259 | 0          | 0        |
| LOC100134368 | 0          | 0        |
| LOC100134391 | 0          | 0        |
| LOC100134713 | 0          | 0        |
| LOC100134868 | 0          | 0        |
| LOC100134869 | 0          | 0        |
| LOC100134934 | 5.05538642 | 5.646882 |
| LOC100135063 | 0          | 0        |
| LOC100135064 | 0          | 0        |
| LOC100144494 | 0          | 0        |
| LOC100144603 | 0          | 0        |
| LOC100144604 | 0          | 0        |
| LOC100147811 | 0          | 0        |
| LOC100151661 | 0          | 0        |
| LOC100158258 | 0          | 0        |
| LOC100169752 | 0          | 0        |
| LOC100170229 | 0          | 0.00996  |
| LOC100170939 | 0          | 0        |
| LOC100174950 | 0          | 0        |
| LOC100187725 | 0          | 0        |
| LOC100188891 | 0          | 0        |
| LOC100188945 | 0          | 0        |
| LOC100188947 | 0          | 0        |
| LOC100188949 | 0          | 0        |



|              |            |          |
|--------------|------------|----------|
| LOC100189589 | 0          | 0        |
| LOC100190799 | 0          | 0        |
| LOC100190800 | 0          | 0        |
| LOC100190922 | 0          | 0        |
| LOC100190923 | 0          | 0        |
| LOC100190924 | 0          | 0        |
| LOC100190934 | 0          | 0        |
| LOC100190938 | 0          | 0        |
| LOC100190939 | 0          | 0        |
| LOC100190940 | 0          | 0        |
| LOC100190986 | 0          | 0        |
| LOC100190987 | 0          | 0        |
| LOC100191040 | 0.03682195 | 0.027887 |
| LOC100192204 | 0          | 0        |
| LOC100192378 | 0          | 0        |
| LOC100192379 | 0          | 0        |
| LOC100192389 | 0          | 0        |
| LOC100192426 | 0          | 0        |
| LOC100194425 | 0          | 0        |
| LOC100194426 | 0          | 0        |
| LOC100196944 | 0          | 0        |
| LOC100216001 | 0          | 0        |
| LOC100216337 | 0          | 0        |
| LOC100216346 | 0          | 0        |
| LOC100216355 | 0          | 0        |
| LOC100216356 | 0          | 0        |
| LOC100216479 | 0          | 0        |
| LOC100216487 | 0          | 0        |
| LOC100216488 | 0          | 0        |
| LOC100216545 | 0          | 0        |
| LOC100217367 | 0          | 0        |
| LOC100233146 | 0          | 0        |
| LOC100233198 | 0          | 0        |
| LOC100233209 | 0          | 0        |
| LOC100240706 | 0          | 0        |
| LOC100240707 | 0          | 0        |
| LOC100240708 | 0          | 0        |
| LOC100240709 | 0          | 0        |
| LOC100240710 | 0          | 0        |
| LOC100240711 | 0          | 0        |
| LOC100240712 | 0          | 0        |
| LOC100240713 | 0          | 0        |
| LOC100240714 | 0          | 0        |
| LOC100240726 | 0          | 0        |
| LOC100240734 | 0          | 0        |
| LOC100240735 | 0          | 0        |
| LOC100240749 | 0          | 0        |

|              |            |          |
|--------------|------------|----------|
| LOC100268168 | 0          | 0        |
| LOC100270647 | 0          | 0        |
| LOC100270648 | 0          | 0        |
| LOC100270670 | 0          | 0        |
| LOC100270709 | 0          | 0        |
| LOC100270710 | 0          | 0        |
| LOC100270746 | 0          | 0        |
| LOC100270790 | 0          | 0        |
| LOC100270804 | 0          | 0        |
| LOC100271656 | 0          | 0        |
| LOC100271700 | 0          | 0        |
| LOC100271703 | 0          | 0        |
| LOC100271715 | 0.05889448 | 0.062126 |
| LOC100271717 | 0          | 0        |
| LOC100271722 | 0          | 0        |
| LOC100271831 | 0          | 0        |
| LOC100271832 | 0          | 0        |
| LOC100271836 | 0          | 0        |
| LOC100271842 | 0          | 0        |
| LOC100286880 | 0          | 0        |
| LOC100286881 | 0          | 0        |
| LOC100286882 | 0          | 0        |
| LOC100286883 | 0          | 0        |
| LOC100286884 | 0          | 0        |
| LOC100286885 | 0          | 0        |
| LOC100286886 | 5.86229067 | 5.378952 |
| LOC100286887 | 0.03463811 | 0.013116 |
| LOC100286888 | 0          | 0        |
| LOC100286889 | 0.06751872 | 0.076702 |
| LOC100286890 | 0          | 0        |
| LOC100286891 | 0          | 0        |
| LOC100286892 | 0          | 0        |
| LOC100286893 | 0          | 0.013045 |
| LOC100286894 | 0.31211692 | 0.225635 |
| LOC100286896 | 0          | 0        |
| LOC100286897 | 0          | 0.033688 |
| LOC100286898 | 0.30345839 | 0.213406 |
| LOC100286900 | 0          | 0        |
| LOC100286901 | 0          | 0        |
| LOC100286902 | 0          | 0        |
| LOC100286903 | 0.35555802 | 0.13464  |
| LOC100286904 | 0          | 0        |
| LOC100286905 | 0          | 0.047962 |
| LOC100286906 | 0          | 0        |
| LOC100286907 | 0          | 0.024649 |
| LOC100286908 | 0          | 0        |
| LOC100286909 | 10.7696596 | 8.065102 |

|              |            |          |
|--------------|------------|----------|
| LOC100286910 | 0          | 0        |
| LOC100286911 | 0          | 0        |
| LOC100286912 | 0          | 0        |
| LOC100286913 | 0.0102313  | 0.034869 |
| LOC100286914 | 0.02251106 | 0.025573 |
| LOC100286915 | 0          | 0.007658 |
| LOC100286916 | 0          | 0        |
| LOC100286917 | 0.07377309 | 0.125711 |
| LOC100286918 | 0          | 0        |
| LOC100286919 | 0          | 0        |
| LOC100286920 | 0          | 0        |
| LOC100286921 | 0          | 0.04111  |
| LOC100286922 | 0          | 0        |
| LOC100286923 | 0.03714723 | 0.0422   |
| LOC100286924 | 0          | 0        |
| LOC100286925 | 0          | 0        |
| LOC100286926 | 0          | 0.033832 |
| LOC100286928 | 0.00900057 | 0        |
| LOC100286929 | 0          | 0        |
| LOC100286931 | 0.07627085 | 0.057763 |
| LOC100286932 | 0          | 0        |
| LOC100286933 | 0.06706645 | 0        |
| LOC100286934 | 0.03669342 | 0.055579 |
| LOC100286935 | 0          | 0        |
| LOC100286936 | 0.02224903 | 0.075826 |
| LOC100286937 | 0          | 0.055247 |
| LOC100286938 | 0          | 0.062445 |
| LOC100286939 | 0.07345094 | 0.104302 |
| LOC100286940 | 0.56106923 | 0.637384 |
| LOC100286941 | 0          | 0        |
| LOC100286942 | 0          | 0        |
| LOC100286943 | 0          | 0        |
| LOC100286944 | 1.05952257 | 0.844107 |
| LOC100286945 | 0          | 0        |
| LOC100286946 | 0          | 0        |
| LOC100286947 | 0.05363605 | 0.243726 |
| LOC100286948 | 0          | 0        |
| LOC100286949 | 0.0296968  | 0        |
| LOC100286950 | 0          | 0        |
| LOC100286951 | 0          | 0.066718 |
| LOC100286952 | 0          | 0        |
| LOC100286953 | 0          | 0        |
| LOC100286954 | 0          | 0        |
| LOC100286955 | 0          | 0        |
| LOC100286956 | 0          | 0.042349 |
| LOC100286957 | 0          | 0        |
| LOC100286958 | 0          | 0        |

|              |            |          |
|--------------|------------|----------|
| LOC100286960 | 0.06007237 | 0.20473  |
| LOC100286961 | 0          | 0        |
| LOC100286962 | 0          | 0        |
| LOC100286963 | 0          | 0        |
| LOC100286965 | 0          | 0        |
| LOC100286966 | 0          | 0        |
| LOC100286967 | 5.01740852 | 5.021301 |
| LOC100286968 | 0          | 0.038094 |
| LOC100286969 | 0          | 0        |
| LOC100286970 | 0          | 0        |
| LOC100286971 | 0          | 0        |
| LOC100286972 | 0          | 0.032854 |
| LOC100286973 | 0          | 0        |
| LOC100286974 | 0.03672547 | 0.083441 |
| LOC100286975 | 0          | 0        |
| LOC100286976 | 0          | 0        |
| LOC100286977 | 4.64692522 | 3.624479 |
| LOC100286978 | 0          | 0        |
| LOC100286979 | 0          | 0        |
| LOC100286980 | 0.02518004 | 0.028605 |
| LOC100286981 | 0          | 0.025037 |
| LOC100286982 | 0          | 0        |
| LOC100286983 | 0          | 0        |
| LOC100286984 | 0          | 0        |
| LOC100286985 | 0.03249665 | 0        |
| LOC100286986 | 0          | 0.011267 |
| LOC100286987 | 0.55767513 | 0.333436 |
| LOC100286988 | 33.9334804 | 29.84772 |
| LOC100286989 | 0.75924806 | 0.331738 |
| LOC100286990 | 0          | 0        |
| LOC100286991 | 0          | 0        |
| LOC100286992 | 0          | 0        |
| LOC100286994 | 0.45215766 | 0.385244 |
| LOC100286995 | 0          | 0.013052 |
| LOC100286997 | 0          | 0        |
| LOC100286998 | 0.00660551 | 0.007504 |
| LOC100286999 | 4.13419429 | 2.01279  |
| LOC100287000 | 0          | 0.028882 |
| LOC100287001 | 0          | 0.030158 |
| LOC100287002 | 10.0470964 | 9.206671 |
| LOC100287003 | 0.36765606 | 0.208832 |
| LOC100287004 | 0          | 0        |
| LOC100287005 | 0          | 0        |
| LOC100287006 | 0          | 0        |
| LOC100287007 | 0          | 0        |
| LOC100287008 | 0          | 0        |
| LOC100287009 | 0          | 0        |

|              |            |          |
|--------------|------------|----------|
| LOC100287010 | 0          | 0.042125 |
| LOC100287011 | 0          | 0        |
| LOC100287012 | 0          | 0.025142 |
| LOC100287013 | 0          | 0        |
| LOC100287014 | 0          | 0        |
| LOC100287015 | 3.64757636 | 2.768501 |
| LOC100287016 | 0          | 0.052727 |
| LOC100287017 | 0.98309885 | 1.011456 |
| LOC100287018 | 0          | 0        |
| LOC100287019 | 0.29221175 | 0.221305 |
| LOC100287020 | 0          | 0        |
| LOC100287021 | 0          | 0        |
| LOC100287022 | 0.21166441 | 0.160303 |
| LOC100287024 | 0          | 0        |
| LOC100287025 | 0.02872313 | 0.03263  |
| LOC100287027 | 0          | 0.050232 |
| LOC100287028 | 0          | 0        |
| LOC100287029 | 0.60942988 | 0        |
| LOC100287030 | 0.05042046 | 0        |
| LOC100287031 | 0.19670268 | 0.248286 |
| LOC100287032 | 0.03498391 | 0        |
| LOC100287033 | 0          | 0        |
| LOC100287034 | 0          | 0        |
| LOC100287035 | 0          | 0        |
| LOC100287036 | 0          | 0        |
| LOC100287037 | 0.15140661 | 0.183467 |
| LOC100287038 | 0          | 0        |
| LOC100287039 | 0.14673711 | 0.119068 |
| LOC100287040 | 0          | 0        |
| LOC100287041 | 0          | 0.010522 |
| LOC100287042 | 0.05889448 | 0.033453 |
| LOC100287043 | 0.06229728 | 0.035385 |
| LOC100287044 | 0.04188313 | 0        |
| LOC100287045 | 0          | 0        |
| LOC100287046 | 6.93085941 | 5.46449  |
| LOC100287047 | 3.36571504 | 3.068245 |
| LOC100287048 | 0.03695137 | 0.083955 |
| LOC100287049 | 3.03025834 | 3.442422 |
| LOC100287050 | 0          | 0        |
| LOC100287051 | 0.01607441 | 0.018261 |
| LOC100287052 | 0          | 0        |
| LOC100287053 | 0.04672296 | 0.053078 |
| LOC100287054 | 0          | 0.033688 |
| LOC100287056 | 0          | 0.009903 |
| LOC100287058 | 0          | 0        |
| LOC100287059 | 0          | 0        |
| LOC100287060 | 0          | 0        |

|              |            |          |
|--------------|------------|----------|
| LOC100287061 | 0.04188313 | 0.04758  |
| LOC100287062 | 6.08572394 | 6.841463 |
| LOC100287063 | 2.64707404 | 2.835283 |
| LOC100287064 | 5.18717047 | 3.614194 |
| LOC100287065 | 0          | 0        |
| LOC100287066 | 0          | 0        |
| LOC100287067 | 0          | 0        |
| LOC100287068 | 0          | 0        |
| LOC100287069 | 0.18397165 | 0.388133 |
| LOC100287070 | 0          | 0        |
| LOC100287071 | 0          | 0        |
| LOC100287072 | 0          | 0        |
| LOC100287073 | 0          | 0        |
| LOC100287074 | 0          | 0        |
| LOC100287075 | 0          | 0.036746 |
| LOC100287076 | 0          | 0        |
| LOC100287077 | 0          | 0        |
| LOC100287078 | 2.4524103  | 3.788929 |
| LOC100287079 | 0          | 0        |
| LOC100287080 | 0.02416705 | 0.027454 |
| LOC100287081 | 0.13998223 | 0.127218 |
| LOC100287082 | 0          | 0        |
| LOC100287083 | 0          | 0        |
| LOC100287084 | 0          | 0        |
| LOC100287085 | 0          | 0        |
| LOC100287086 | 0.0323218  | 0.055077 |
| LOC100287087 | 0          | 0        |
| LOC100287088 | 0          | 0        |
| LOC100287089 | 0.02514992 | 0        |
| LOC100287090 | 0.02333555 | 0        |
| LOC100287091 | 0          | 0        |
| LOC100287093 | 0.03708171 | 0.126376 |
| LOC100287094 | 0.02990801 | 0.033976 |
| LOC100287095 | 0          | 0        |
| LOC100287097 | 0          | 0        |
| LOC100287098 | 0          | 0.079617 |
| LOC100287099 | 0          | 0        |
| LOC100287100 | 0.52021437 | 0.640219 |
| LOC100287102 | 0.04238978 | 0.032104 |
| LOC100287103 | 0          | 0        |
| LOC100287104 | 0.01109516 | 0.012604 |
| LOC100287105 | 0          | 0        |
| LOC100287106 | 0          | 0        |
| LOC100287107 | 0.03161704 | 0        |
| LOC100287108 | 0          | 0        |
| LOC100287109 | 2.73712849 | 1.70325  |
| LOC100287110 | 0          | 0        |

|              |            |          |
|--------------|------------|----------|
| LOC100287111 | 0          | 0        |
| LOC100287112 | 0          | 0        |
| LOC100287113 | 0          | 0        |
| LOC100287114 | 0.21942945 | 0.271937 |
| LOC100287115 | 0          | 0        |
| LOC100287116 | 0          | 0        |
| LOC100287117 | 0          | 0        |
| LOC100287118 | 5.62157641 | 9.092217 |
| LOC100287119 | 0.00834008 | 0.009474 |
| LOC100287120 | 0.50060312 | 1.381112 |
| LOC100287121 | 0.6558704  | 0.659927 |
| LOC100287122 | 0.06307599 | 0.167196 |
| LOC100287123 | 0          | 0        |
| LOC100287124 | 0          | 0        |
| LOC100287125 | 0.04141562 | 0.015683 |
| LOC100287126 | 0.16214908 | 0        |
| LOC100287127 | 0.05824191 | 0.066164 |
| LOC100287128 | 0          | 0        |
| LOC100287129 | 0.02495588 | 0.014175 |
| LOC100287130 | 3.0273159  | 2.567531 |
| LOC100287131 | 0          | 0        |
| LOC100287132 | 0.22547272 | 0.21345  |
| LOC100287133 | 0.04613347 | 0        |
| LOC100287134 | 0          | 0        |
| LOC100287135 | 0.15235747 | 0        |
| LOC100287136 | 0          | 0        |
| LOC100287137 | 0          | 0        |
| LOC100287139 | 0.03521831 | 0        |
| LOC100287140 | 0          | 0        |
| LOC100287141 | 0.02900046 | 0.032945 |
| LOC100287142 | 0.28118984 | 0.159718 |
| LOC100287143 | 0.02982316 | 0        |
| LOC100287144 | 0          | 0        |
| LOC100287145 | 0          | 0        |
| LOC100287146 | 3.10209801 | 3.096877 |
| LOC100287147 | 0.02755613 | 0.031304 |
| LOC100287148 | 0          | 0        |
| LOC100287149 | 0.02579795 | 0.029307 |
| LOC100287150 | 0.11365044 | 0.172145 |
| LOC100287151 | 0.03850793 | 0.131237 |
| LOC100287152 | 0          | 0        |
| LOC100287153 | 0.50843617 | 0.4247   |
| LOC100287154 | 0          | 0        |
| LOC100287155 | 0.03069391 | 0        |
| LOC100287156 | 0          | 0        |
| LOC100287157 | 0          | 0        |
| LOC100287158 | 0          | 0        |

|              |            |          |
|--------------|------------|----------|
| LOC100287159 | 0          | 0.045237 |
| LOC100287160 | 0          | 0        |
| LOC100287161 | 0.06460813 | 0.031455 |
| LOC100287162 | 0          | 0        |
| LOC100287164 | 0.25624201 | 0.352378 |
| LOC100287165 | 0.09871047 | 0.037379 |
| LOC100287166 | 0.02147633 | 0.012199 |
| LOC100287168 | 0.11643775 | 0.141723 |
| LOC100287169 | 0          | 0        |
| LOC100287170 | 0.27404486 | 0.570752 |
| LOC100287171 | 41.6590533 | 40.64457 |
| LOC100287172 | 49.2696597 | 22.86    |
| LOC100287173 | 0          | 0        |
| LOC100287174 | 0.01963149 | 0.044603 |
| LOC100287175 | 0.71881473 | 1.275914 |
| LOC100287176 | 0.03631318 | 0.041252 |
| LOC100287177 | 0.14440475 | 0.131237 |
| LOC100287178 | 0          | 0        |
| LOC100287179 | 0          | 0        |
| LOC100287180 | 0.01914875 | 0.021753 |
| LOC100287181 | 0          | 0        |
| LOC100287182 | 0          | 0        |
| LOC100287183 | 0          | 0        |
| LOC100287184 | 0.0594776  | 0.067567 |
| LOC100287185 | 0          | 0        |
| LOC100287186 | 0.06371312 | 0        |
| LOC100287187 | 0.00703188 | 0.007988 |
| LOC100287189 | 0          | 0.050074 |
| LOC100287190 | 0          | 0        |
| LOC100287191 | 0          | 0        |
| LOC100287192 | 0          | 0        |
| LOC100287193 | 0          | 0        |
| LOC100287194 | 0          | 0        |
| LOC100287196 | 0.03200203 | 0.036355 |
| LOC100287197 | 0          | 0        |
| LOC100287198 | 0.19872714 | 0.150505 |
| LOC100287199 | 0          | 0        |
| LOC100287201 | 0          | 0.010644 |
| LOC100287202 | 0          | 0        |
| LOC100287203 | 0          | 0        |
| LOC100287204 | 0.02291589 | 0.013016 |
| LOC100287205 | 0          | 0        |
| LOC100287206 | 0.07557632 | 0.034342 |
| LOC100287207 | 0          | 0        |
| LOC100287208 | 0          | 0        |
| LOC100287209 | 0          | 0        |
| LOC100287210 | 0          | 0        |



|              |            |          |
|--------------|------------|----------|
| LOC100287211 | 0          | 0        |
| LOC100287212 | 0          | 0        |
| LOC100287213 | 0.03133432 | 0        |
| LOC100287214 | 0.12597562 | 0.171732 |
| LOC100287215 | 0          | 0        |
| LOC100287216 | 0          | 0        |
| LOC100287217 | 0          | 0        |
| LOC100287218 | 0          | 0        |
| LOC100287219 | 0          | 0.039414 |
| LOC100287220 | 0          | 0        |
| LOC100287221 | 0          | 0        |
| LOC100287222 | 0.02338746 | 0.053137 |
| LOC100287223 | 0          | 0.050391 |
| LOC100287224 | 0.05349957 | 0        |
| LOC100287225 | 0          | 0        |
| LOC100287226 | 0          | 0        |
| LOC100287227 | 0.29184225 | 0.187391 |
| LOC100287229 | 0          | 0        |
| LOC100287230 | 0          | 0        |
| LOC100287231 | 0          | 0        |
| LOC100287232 | 1.59375687 | 1.949805 |
| LOC100287233 | 0          | 0.014354 |
| LOC100287235 | 0          | 0        |
| LOC100287236 | 0          | 0        |
| LOC100287237 | 0          | 0.057005 |
| LOC100287238 | 0          | 0        |
| LOC100287239 | 0.00928271 | 0        |
| LOC100287240 | 0.14400912 | 0.109064 |
| LOC100287241 | 0.83544361 | 0.822534 |
| LOC100287242 | 0          | 0        |
| LOC100287243 | 0          | 0        |
| LOC100287244 | 0          | 0.01544  |
| LOC100287245 | 0          | 0        |
| LOC100287246 | 0          | 0        |
| LOC100287247 | 0.02210091 | 0.016738 |
| LOC100287248 | 0          | 0        |
| LOC100287249 | 0          | 0        |
| LOC100287251 | 0.02383824 | 0.054161 |
| LOC100287252 | 0          | 0        |
| LOC100287253 | 0          | 0.034666 |
| LOC100287254 | 8.68318863 | 8.690664 |
| LOC100287255 | 0.01632401 | 0.055633 |
| LOC100287256 | 0.02892068 | 0.032854 |
| LOC100287258 | 0.07300462 | 0.248803 |
| LOC100287259 | 0.02243899 | 0.127455 |
| LOC100287260 | 0          | 0        |
| LOC100287262 | 0          | 0        |

|              |            |          |
|--------------|------------|----------|
| LOC100287263 | 0.14890461 | 0.101495 |
| LOC100287264 | 0          | 0        |
| LOC100287265 | 0.17105858 | 0.270366 |
| LOC100287266 | 0          | 0        |
| LOC100287267 | 0          | 0        |
| LOC100287268 | 0          | 0        |
| LOC100287269 | 0.04656773 | 0        |
| LOC100287270 | 0          | 0        |
| LOC100287271 | 0          | 0        |
| LOC100287272 | 0          | 0        |
| LOC100287273 | 0          | 0        |
| LOC100287274 | 0          | 0        |
| LOC100287275 | 0          | 0        |
| LOC100287276 | 0.49837822 | 0.353853 |
| LOC100287277 | 0          | 0        |
| LOC100287278 | 0          | 0        |
| LOC100287279 | 0          | 0        |
| LOC100287280 | 0          | 0        |
| LOC100287281 | 0.03621935 | 0.041146 |
| LOC100287282 | 0.38539303 | 0.462136 |
| LOC100287283 | 0.22853621 | 0.04327  |
| LOC100287284 | 0          | 0        |
| LOC100287285 | 0          | 0        |
| LOC100287286 | 0.14911582 | 0.03388  |
| LOC100287287 | 0          | 0        |
| LOC100287288 | 0          | 0        |
| LOC100287289 | 0          | 0        |
| LOC100287290 | 0.01542577 | 0.035048 |
| LOC100287291 | 0          | 0        |
| LOC100287292 | 0          | 0        |
| LOC100287294 | 0.02275469 | 0        |
| LOC100287295 | 0          | 0        |
| LOC100287297 | 0          | 0        |
| LOC100287298 | 0          | 0.039028 |
| LOC100287299 | 0          | 0        |
| LOC100287300 | 0          | 0        |
| LOC100287301 | 0.01968664 | 0.111822 |
| LOC100287302 | 0          | 0        |
| LOC100287303 | 0          | 0        |
| LOC100287304 | 1.42461355 | 1.785803 |
| LOC100287305 | 0          | 0        |
| LOC100287306 | 0          | 0        |
| LOC100287307 | 0          | 0        |
| LOC100287308 | 1.82362564 | 1.949805 |
| LOC100287309 | 0          | 0        |
| LOC100287310 | 1.22240296 | 0.555468 |
| LOC100287311 | 13.9537482 | 11.51219 |

|              |            |          |
|--------------|------------|----------|
| LOC100287312 | 0.30604557 | 0.312905 |
| LOC100287313 | 0.09871047 | 0        |
| LOC100287314 | 0          | 0        |
| LOC100287315 | 0          | 0        |
| LOC100287316 | 0          | 0        |
| LOC100287317 | 0          | 0        |
| LOC100287318 | 0          | 0        |
| LOC100287319 | 0          | 0        |
| LOC100287321 | 0          | 0        |
| LOC100287322 | 0          | 0.062201 |
| LOC100287323 | 32.5797921 | 29.13553 |
| LOC100287325 | 0          | 0        |
| LOC100287326 | 0          | 0        |
| LOC100287327 | 0          | 0        |
| LOC100287328 | 0          | 0        |
| LOC100287329 | 0          | 0        |
| LOC100287330 | 0          | 0.019411 |
| LOC100287331 | 0.01489046 | 0        |
| LOC100287332 | 0          | 0        |
| LOC100287333 | 0          | 0        |
| LOC100287334 | 5.35806821 | 5.123741 |
| LOC100287335 | 0          | 0        |
| LOC100287336 | 1.84003814 | 1.067083 |
| LOC100287337 | 0          | 0        |
| LOC100287338 | 24.9054602 | 18.43496 |
| LOC100287339 | 0          | 0        |
| LOC100287340 | 0          | 0        |
| LOC100287341 | 0.0499414  | 0.085101 |
| LOC100287342 | 0.04045926 | 0.076604 |
| LOC100287343 | 0.03469527 | 0.039414 |
| LOC100287344 | 0.65704159 | 1.446169 |
| LOC100287345 | 0          | 0        |
| LOC100287346 | 0.01004075 | 0.057032 |
| LOC100287347 | 0          | 0.027142 |
| LOC100287349 | 0          | 0        |
| LOC100287350 | 0          | 0        |
| LOC100287351 | 2.33614788 | 3.664911 |
| LOC100287352 | 0          | 0        |
| LOC100287354 | 0.1349941  | 0.115017 |
| LOC100287355 | 0          | 0        |
| LOC100287356 | 0          | 0        |
| LOC100287357 | 0          | 0        |
| LOC100287358 | 0.36172612 | 0.102732 |
| LOC100287359 | 0.03798614 | 0        |
| LOC100287360 | 0          | 0        |
| LOC100287361 | 0          | 0        |
| LOC100287362 | 0          | 0        |

|              |            |          |
|--------------|------------|----------|
| LOC100287363 | 0          | 0        |
| LOC100287364 | 0          | 0        |
| LOC100287365 | 0          | 0        |
| LOC100287366 | 0          | 0        |
| LOC100287367 | 0          | 0        |
| LOC100287368 | 0.11124514 | 0.126376 |
| LOC100287369 | 0          | 0        |
| LOC100287370 | 0          | 0        |
| LOC100287371 | 0.07864837 | 0.044673 |
| LOC100287372 | 4.14785441 | 5.036996 |
| LOC100287373 | 0          | 0        |
| LOC100287374 | 0.41729665 | 0.802248 |
| LOC100287375 | 0.03959573 | 0.044981 |
| LOC100287376 | 0          | 0        |
| LOC100287377 | 0.01574931 | 0        |
| LOC100287378 | 0.26013874 | 0.365056 |
| LOC100287379 | 0          | 0.043036 |
| LOC100287380 | 7.17048859 | 8.053746 |
| LOC100287381 | 0          | 0        |
| LOC100287382 | 0          | 0.020573 |
| LOC100287383 | 0          | 0        |
| LOC100287384 | 0          | 0        |
| LOC100287385 | 0          | 0.046289 |
| LOC100287386 | 0.03708171 | 0        |
| LOC100287387 | 0          | 0        |
| LOC100287388 | 0          | 0        |
| LOC100287389 | 0          | 0        |
| LOC100287390 | 0          | 0        |
| LOC100287391 | 0.0882358  | 0.171835 |
| LOC100287392 | 0          | 0        |
| LOC100287393 | 0          | 0.039842 |
| LOC100287395 | 0          | 0        |
| LOC100287396 | 0          | 0        |
| LOC100287397 | 0.01048645 | 0.011913 |
| LOC100287398 | 0          | 0        |
| LOC100287399 | 0          | 0        |
| LOC100287400 | 0.06871023 | 0.117084 |
| LOC100287401 | 0.16630205 | 0.512788 |
| LOC100287402 | 1.09978654 | 1.249375 |
| LOC100287403 | 0          | 0        |
| LOC100287404 | 0          | 0        |
| LOC100287405 | 0.06202163 | 0        |
| LOC100287406 | 0.04958804 | 0.056333 |
| LOC100287407 | 0          | 0        |
| LOC100287408 | 0.09589661 | 0.05447  |
| LOC100287409 | 7.55995556 | 6.130319 |
| LOC100287410 | 0.2242702  | 0.254775 |

|              |            |          |
|--------------|------------|----------|
| LOC100287411 | 0          | 0        |
| LOC100287412 | 0.09882647 | 0        |
| LOC100287413 | 0          | 0        |
| LOC100287414 | 0.13120331 | 0.186311 |
| LOC100287415 | 0.06321507 | 0.043088 |
| LOC100287416 | 0          | 0        |
| LOC100287417 | 0.41729665 | 0.309959 |
| LOC100287418 | 0          | 0        |
| LOC100287419 | 0          | 0        |
| LOC100287420 | 0.39885452 | 0.48547  |
| LOC100287421 | 0          | 0        |
| LOC100287422 | 0          | 0        |
| LOC100287423 | 0.07509047 | 0.127956 |
| LOC100287424 | 0          | 0        |
| LOC100287425 | 0.14600924 | 0        |
| LOC100287426 | 0.04654196 | 0.013218 |
| LOC100287427 | 0          | 0        |
| LOC100287428 | 1.63797693 | 1.513845 |
| LOC100287430 | 0          | 0        |
| LOC100287431 | 0          | 0        |
| LOC100287432 | 0          | 0        |
| LOC100287433 | 0          | 0        |
| LOC100287434 | 0.07964141 | 0        |
| LOC100287436 | 0          | 0        |
| LOC100287437 | 0          | 0.080286 |
| LOC100287438 | 0.27154486 | 0.308479 |
| LOC100287439 | 0          | 0.027549 |
| LOC100287440 | 0.01886526 | 0        |
| LOC100287441 | 0          | 0        |
| LOC100287442 | 0.01985395 | 0.022554 |
| LOC100287443 | 0          | 0        |
| LOC100287444 | 0          | 0        |
| LOC100287445 | 0          | 0        |
| LOC100287446 | 0.07748893 | 0.117372 |
| LOC100287447 | 0          | 0        |
| LOC100287448 | 0          | 0        |
| LOC100287449 | 4.94220927 | 5.937971 |
| LOC100287450 | 0.81854342 | 0.255261 |
| LOC100287451 | 0          | 0        |
| LOC100287452 | 0          | 0        |
| LOC100287453 | 0          | 0        |
| LOC100287454 | 0.02494108 | 0.014167 |
| LOC100287455 | 0.04121459 | 0.013377 |
| LOC100287456 | 0          | 0        |
| LOC100287458 | 0.08107454 | 0.107452 |
| LOC100287459 | 0          | 0.035281 |
| LOC100287460 | 0          | 0.026019 |

|              |            |          |
|--------------|------------|----------|
| LOC100287461 | 0          | 0        |
| LOC100287462 | 0          | 0        |
| LOC100287463 | 0          | 0        |
| LOC100287464 | 0          | 0        |
| LOC100287465 | 0          | 0        |
| LOC100287466 | 0.35230956 | 0.200115 |
| LOC100287467 | 0          | 0        |
| LOC100287468 | 0.02037338 | 0        |
| LOC100287469 | 0          | 0        |
| LOC100287471 | 0.34695266 | 0.315315 |
| LOC100287472 | 0          | 0        |
| LOC100287473 | 0.0323965  | 0.110409 |
| LOC100287474 | 0.03937328 | 0        |
| LOC100287475 | 0.39795579 | 0.188368 |
| LOC100287476 | 0.26399519 | 0.407011 |
| LOC100287477 | 0          | 0        |
| LOC100287478 | 0          | 0        |
| LOC100287479 | 0          | 0        |
| LOC100287480 | 0          | 0        |
| LOC100287481 | 4.06130325 | 6.532679 |
| LOC100287482 | 0.02031433 | 0.023077 |
| LOC100287483 | 0          | 0        |
| LOC100287484 | 0.11863251 | 0.103668 |
| LOC100287485 | 0          | 0        |
| LOC100287486 | 0          | 0.057589 |
| LOC100287487 | 0          | 0        |
| LOC100287488 | 0.14278663 | 0        |
| LOC100287489 | 0          | 0        |
| LOC100287490 | 0          | 0        |
| LOC100287491 | 0.21330046 | 0.207697 |
| LOC100287492 | 0          | 0        |
| LOC100287493 | 0          | 0        |
| LOC100287494 | 0          | 0        |
| LOC100287495 | 0          | 0        |
| LOC100287496 | 0          | 0        |
| LOC100287497 | 0          | 0        |
| LOC100287498 | 0          | 0        |
| LOC100287499 | 0          | 0.010234 |
| LOC100287500 | 0.37747452 | 0.228702 |
| LOC100287501 | 0          | 0        |
| LOC100287503 | 0          | 0        |
| LOC100287504 | 0          | 0.041977 |
| LOC100287505 | 0          | 0        |
| LOC100287506 | 2.9911878  | 2.496012 |
| LOC100287507 | 0          | 0        |
| LOC100287508 | 0          | 0        |
| LOC100287509 | 0          | 0        |

|              |            |          |
|--------------|------------|----------|
| LOC100287510 | 0          | 0.008174 |
| LOC100287511 | 0          | 0        |
| LOC100287512 | 0          | 0        |
| LOC100287513 | 0          | 0        |
| LOC100287514 | 0.18952411 | 0.322954 |
| LOC100287516 | 0.08045407 | 0.030466 |
| LOC100287517 | 0          | 0        |
| LOC100287518 | 0          | 0        |
| LOC100287519 | 0          | 0        |
| LOC100287520 | 0.01766835 | 0        |
| LOC100287521 | 0          | 0        |
| LOC100287522 | 4.19870452 | 5.998378 |
| LOC100287523 | 0          | 0        |
| LOC100287524 | 0.07874656 | 0.107349 |
| LOC100287525 | 0.24312362 | 0.28724  |
| LOC100287526 | 0          | 0.042882 |
| LOC100287527 | 0          | 0        |
| LOC100287528 | 0          | 0        |
| LOC100287529 | 0.12286534 | 0.279154 |
| LOC100287530 | 0.03060456 | 0        |
| LOC100287531 | 0          | 0.133935 |
| LOC100287532 | 0          | 0        |
| LOC100287533 | 0          | 0        |
| LOC100287535 | 0          | 0        |
| LOC100287536 | 0.72758466 | 0.466258 |
| LOC100287537 | 0          | 0        |
| LOC100287538 | 0          | 0        |
| LOC100287539 | 0          | 0        |
| LOC100287540 | 0          | 0        |
| LOC100287541 | 0          | 0        |
| LOC100287543 | 0.03069391 | 0.069738 |
| LOC100287544 | 0          | 0        |
| LOC100287545 | 0          | 0        |
| LOC100287546 | 0          | 0.033453 |
| LOC100287547 | 0          | 0        |
| LOC100287548 | 0.08410132 | 0        |
| LOC100287550 | 0          | 0.028917 |
| LOC100287551 | 0          | 0        |
| LOC100287552 | 11.2451864 | 11.33531 |
| LOC100287553 | 0          | 0        |
| LOC100287554 | 0          | 0        |
| LOC100287555 | 0          | 0        |
| LOC100287556 | 0          | 0        |
| LOC100287557 | 0.02071461 | 0.023532 |
| LOC100287558 | 0          | 0        |
| LOC100287559 | 0          | 0        |
| LOC100287560 | 0          | 0        |

|              |            |          |
|--------------|------------|----------|
| LOC100287561 | 0          | 0        |
| LOC100287562 | 0.04958804 | 0.028166 |
| LOC100287563 | 0.08806421 | 0.300127 |
| LOC100287564 | 0          | 0        |
| LOC100287565 | 0          | 0        |
| LOC100287566 | 0.07941579 | 0        |
| LOC100287567 | 0          | 0        |
| LOC100287568 | 0          | 0        |
| LOC100287569 | 5.21401122 | 4.019314 |
| LOC100287570 | 0          | 0        |
| LOC100287571 | 0          | 0.054039 |
| LOC100287572 | 0.65816859 | 0.686236 |
| LOC100287573 | 0          | 0        |
| LOC100287574 | 0          | 0        |
| LOC100287575 | 0          | 0        |
| LOC100287576 | 0          | 0        |
| LOC100287578 | 14.5186103 | 34.09105 |
| LOC100287579 | 0          | 0        |
| LOC100287580 | 5.5415601  | 4.814053 |
| LOC100287581 | 0          | 0        |
| LOC100287582 | 0.1769809  | 0.281474 |
| LOC100287584 | 0          | 0        |
| LOC100287585 | 0          | 0.022726 |
| LOC100287586 | 0          | 0        |
| LOC100287587 | 0          | 0        |
| LOC100287588 | 0          | 0        |
| LOC100287589 | 0          | 0        |
| LOC100287590 | 0.39035506 | 0.412867 |
| LOC100287591 | 0          | 0        |
| LOC100287592 | 0          | 0        |
| LOC100287593 | 0          | 0        |
| LOC100287594 | 0          | 0        |
| LOC100287595 | 0          | 0        |
| LOC100287596 | 0.02224903 | 0.037913 |
| LOC100287597 | 0          | 0        |
| LOC100287598 | 0          | 0        |
| LOC100287599 | 0          | 0        |
| LOC100287600 | 0.60679166 | 0.741024 |
| LOC100287601 | 0          | 0        |
| LOC100287602 | 0          | 0        |
| LOC100287603 | 0          | 0        |
| LOC100287604 | 0          | 0        |
| LOC100287605 | 0          | 0        |
| LOC100287607 | 0          | 0.022683 |
| LOC100287608 | 0          | 0        |
| LOC100287609 | 0.0381585  | 0.086697 |
| LOC100287611 | 0.03147505 | 0        |



|              |            |          |
|--------------|------------|----------|
| LOC100287612 | 0.02776721 | 0.018926 |
| LOC100287613 | 0          | 0        |
| LOC100287614 | 0          | 0        |
| LOC100287615 | 0.29977119 | 0.399259 |
| LOC100287616 | 0.02781128 | 0        |
| LOC100287617 | 0          | 0        |
| LOC100287618 | 0          | 0        |
| LOC100287619 | 0          | 0        |
| LOC100287620 | 0          | 0        |
| LOC100287621 | 0          | 0        |
| LOC100287622 | 0          | 0        |
| LOC100287623 | 0          | 0        |
| LOC100287624 | 0          | 0        |
| LOC100287625 | 0          | 0        |
| LOC100287626 | 0.03978303 | 0.090388 |
| LOC100287627 | 0          | 0        |
| LOC100287628 | 0          | 0.026717 |
| LOC100287629 | 0          | 0        |
| LOC100287630 | 0          | 0        |
| LOC100287631 | 0          | 0        |
| LOC100287632 | 0          | 0        |
| LOC100287633 | 0.0800965  | 0        |
| LOC100287634 | 0          | 0        |
| LOC100287635 | 0          | 0        |
| LOC100287636 | 0          | 0        |
| LOC100287637 | 0          | 0        |
| LOC100287638 | 0          | 0        |
| LOC100287639 | 0          | 0        |
| LOC100287640 | 0          | 0        |
| LOC100287642 | 0.03631318 | 0.082505 |
| LOC100287643 | 0.62002866 | 0.821756 |
| LOC100287644 | 0          | 0.039942 |
| LOC100287645 | 0.02598928 | 0        |
| LOC100287646 | 0.03941018 | 0.067156 |
| LOC100287647 | 0.23206767 | 0.052727 |
| LOC100287648 | 0          | 0        |
| LOC100287649 | 0          | 0        |
| LOC100287650 | 0          | 0        |
| LOC100287651 | 0.00678018 | 0        |
| LOC100287652 | 0          | 0        |
| LOC100287653 | 0          | 0        |
| LOC100287654 | 1.61529621 | 1.293526 |
| LOC100287655 | 0          | 0        |
| LOC100287656 | 0          | 0        |
| LOC100287657 | 0          | 0        |
| LOC100287658 | 0          | 0        |
| LOC100287659 | 0.05398031 | 0.061322 |

|              |            |          |
|--------------|------------|----------|
| LOC100287660 | 0          | 0        |
| LOC100287661 | 0          | 0        |
| LOC100287662 | 0          | 0        |
| LOC100287663 | 0          | 0        |
| LOC100287664 | 0          | 0        |
| LOC100287665 | 0.49471367 | 0.843004 |
| LOC100287667 | 0          | 0        |
| LOC100287668 | 0          | 0.020415 |
| LOC100287669 | 0          | 0.044068 |
| LOC100287670 | 0.73091017 | 0.70666  |
| LOC100287671 | 0.05393877 | 0.036765 |
| LOC100287673 | 0.03682195 | 0        |
| LOC100287674 | 0          | 0        |
| LOC100287675 | 0          | 0        |
| LOC100287676 | 0.0551846  | 0.240314 |
| LOC100287677 | 0          | 0        |
| LOC100287678 | 0.02716451 | 0.092578 |
| LOC100287679 | 0          | 0        |
| LOC100287680 | 0          | 0        |
| LOC100287681 | 0          | 0        |
| LOC100287682 | 0          | 0        |
| LOC100287683 | 0.01803202 | 0        |
| LOC100287684 | 0          | 0.01445  |
| LOC100287685 | 0.03224744 | 0        |
| LOC100287686 | 0          | 0        |
| LOC100287687 | 0          | 0        |
| LOC100287688 | 0.66352129 | 0.965769 |
| LOC100287689 | 0.04051123 | 0        |
| LOC100287690 | 0.06211324 | 0        |
| LOC100287691 | 2.94694666 | 2.671784 |
| LOC100287692 | 0          | 0        |
| LOC100287693 | 0          | 0        |
| LOC100287694 | 0.01895882 | 0.021538 |
| LOC100287696 | 0          | 0        |
| LOC100287697 | 0.45054281 | 0.021326 |
| LOC100287698 | 0.02744821 | 0        |
| LOC100287699 | 3.79975861 | 3.453269 |
| LOC100287700 | 0          | 0.02488  |
| LOC100287701 | 0          | 0        |
| LOC100287703 | 0          | 0.104759 |
| LOC100287703 | 0          | 0.104759 |
| LOC100287704 | 0          | 0        |
| LOC100287705 | 0          | 0        |
| LOC100287706 | 0          | 0        |
| LOC100287707 | 0          | 0        |
| LOC100287708 | 0          | 0        |
| LOC100287709 | 0          | 0        |

|              |            |          |
|--------------|------------|----------|
| LOC100287710 | 0.01181198 | 0        |
| LOC100287711 | 0.23404821 | 0.23634  |
| LOC100287712 | 0          | 0        |
| LOC100287713 | 0          | 0        |
| LOC100287714 | 0.23147153 | 0.350607 |
| LOC100287715 | 0          | 0        |
| LOC100287716 | 0.06177864 | 0.187151 |
| LOC100287717 | 0          | 0        |
| LOC100287718 | 0          | 0        |
| LOC100287719 | 0          | 0        |
| LOC100287720 | 0          | 0        |
| LOC100287721 | 0          | 0.077173 |
| LOC100287722 | 0.07482324 | 0        |
| LOC100287723 | 0.01864774 | 0        |
| LOC100287724 | 0          | 0        |
| LOC100287725 | 0          | 0        |
| LOC100287726 | 0          | 0.038277 |
| LOC100287727 | 0          | 0        |
| LOC100287728 | 0.2061307  | 0.167263 |
| LOC100287729 | 0          | 0        |
| LOC100287731 | 0.72708156 | 0.621377 |
| LOC100287733 | 0          | 0        |
| LOC100287734 | 0          | 0        |
| LOC100287736 | 0          | 0.056869 |
| LOC100287737 | 0          | 0        |
| LOC100287738 | 0          | 0.009721 |
| LOC100287739 | 0          | 0        |
| LOC100287740 | 0.5519365  | 0.646603 |
| LOC100287741 | 0          | 0        |
| LOC100287742 | 0          | 0        |
| LOC100287743 | 0          | 0.040346 |
| LOC100287744 | 0.48979873 | 0.392766 |
| LOC100287745 | 0          | 0        |
| LOC100287746 | 0.0794408  | 0        |
| LOC100287747 | 0          | 0        |
| LOC100287748 | 0          | 0        |
| LOC100287749 | 0          | 0.031636 |
| LOC100287750 | 0.85746252 | 0.964151 |
| LOC100287751 | 0          | 0        |
| LOC100287752 | 0.931502   | 1.209373 |
| LOC100287753 | 0          | 0        |
| LOC100287754 | 0          | 0        |
| LOC100287755 | 0          | 0        |
| LOC100287756 | 0          | 0        |
| LOC100287757 | 0          | 0        |
| LOC100287759 | 4.65162189 | 2.70557  |
| LOC100287760 | 0          | 0        |

|              |            |          |
|--------------|------------|----------|
| LOC100287761 | 0          | 0        |
| LOC100287762 | 0.15828355 | 0.104891 |
| LOC100287763 | 0          | 0        |
| LOC100287764 | 0.02978092 | 0.090218 |
| LOC100287765 | 0          | 0        |
| LOC100287767 | 0          | 0.036135 |
| LOC100287768 | 0          | 0        |
| LOC100287770 | 4.00125685 | 7.218308 |
| LOC100287771 | 0.84468579 | 1.481085 |
| LOC100287772 | 0.31702851 | 0.403367 |
| LOC100287773 | 0.02073504 | 0        |
| LOC100287774 | 0.03569666 | 0        |
| LOC100287775 | 0.02912096 | 0        |
| LOC100287776 | 0.05430563 | 0.041128 |
| LOC100287777 | 0          | 0        |
| LOC100287778 | 0          | 0        |
| LOC100287779 | 0.73629564 | 0.774485 |
| LOC100287780 | 0          | 0        |
| LOC100287781 | 0          | 0        |
| LOC100287782 | 0          | 0.057694 |
| LOC100287783 | 0          | 0        |
| LOC100287784 | 0          | 0        |
| LOC100287786 | 0          | 0.035022 |
| LOC100287787 | 0          | 0        |
| LOC100287788 | 0.01428351 | 0.032453 |
| LOC100287789 | 6.4287201  | 4.904033 |
| LOC100287790 | 0          | 0        |
| LOC100287791 | 0          | 0        |
| LOC100287792 | 0          | 0        |
| LOC100287793 | 0          | 0        |
| LOC100287795 | 0.1482397  | 0.224537 |
| LOC100287796 | 0.01152073 | 0        |
| LOC100287797 | 0          | 0        |
| LOC100287799 | 1.20554799 | 1.124964 |
| LOC100287800 | 0          | 0        |
| LOC100287801 | 0          | 0        |
| LOC100287802 | 0          | 0        |
| LOC100287803 | 11.6209608 | 13.1527  |
| LOC100287804 | 0          | 0        |
| LOC100287805 | 0          | 0        |
| LOC100287806 | 0          | 0        |
| LOC100287807 | 0          | 0.019154 |
| LOC100287808 | 0          | 0        |
| LOC100287809 | 0.0188568  | 0        |
| LOC100287810 | 0          | 0        |
| LOC100287811 | 0.03591004 | 0.020397 |
| LOC100287812 | 0.07266819 | 0.045862 |

|              |            |          |
|--------------|------------|----------|
| LOC100287813 | 0          | 0        |
| LOC100287814 | 0.07043662 | 0.080017 |
| LOC100287815 | 0          | 0        |
| LOC100287816 | 0.18371648 | 0.162326 |
| LOC100287817 | 0          | 0        |
| LOC100287820 | 0          | 0.005002 |
| LOC100287821 | 0          | 0        |
| LOC100287822 | 0          | 0        |
| LOC100287824 | 0          | 0        |
| LOC100287825 | 7.67347845 | 6.91564  |
| LOC100287827 | 0.16374868 | 0.074408 |
| LOC100287828 | 0          | 0        |
| LOC100287829 | 0.56825219 | 0.622488 |
| LOC100287830 | 0.26003059 | 0.421998 |
| LOC100287831 | 124.570341 | 135.8361 |
| LOC100287832 | 0          | 0        |
| LOC100287833 | 0          | 0.132695 |
| LOC100287834 | 0          | 0        |
| LOC100287835 | 0          | 0.084102 |
| LOC100287837 | 0.12942285 | 0.334151 |
| LOC100287838 | 0          | 0        |
| LOC100287839 | 0.01055489 | 0.011991 |
| LOC100287840 | 0          | 0        |
| LOC100287841 | 2.27205424 | 2.688078 |
| LOC100287842 | 0          | 0        |
| LOC100287843 | 0          | 0        |
| LOC100287846 | 0          | 0        |
| LOC100287847 | 0          | 0        |
| LOC100287848 | 0          | 0.025934 |
| LOC100287849 | 0.043262   | 0.049146 |
| LOC100287850 | 0.06753318 | 0.17901  |
| LOC100287851 | 0          | 0        |
| LOC100287852 | 0          | 0        |
| LOC100287853 | 0          | 0        |
| LOC100287854 | 0.11251013 | 0.09586  |
| LOC100287856 | 0          | 0        |
| LOC100287857 | 0          | 0        |
| LOC100287858 | 0.24852637 | 0.225864 |
| LOC100287860 | 0          | 0        |
| LOC100287861 | 0          | 0        |
| LOC100287862 | 0.03581828 | 0        |
| LOC100287863 | 0          | 0        |
| LOC100287864 | 0          | 0        |
| LOC100287865 | 0          | 0        |
| LOC100287866 | 0          | 0        |
| LOC100287867 | 0          | 0        |
| LOC100287868 | 0          | 0        |

|              |            |          |
|--------------|------------|----------|
| LOC100287869 | 0.02004321 | 0.011385 |
| LOC100287870 | 0.24882048 | 0.541773 |
| LOC100287871 | 2.07581469 | 2.054633 |
| LOC100287872 | 0.03050096 | 0.03465  |
| LOC100287873 | 0          | 0        |
| LOC100287875 | 0          | 0        |
| LOC100287876 | 0          | 0        |
| LOC100287877 | 0          | 0        |
| LOC100287878 | 0.70385228 | 0.656072 |
| LOC100287879 | 0          | 0        |
| LOC100287880 | 0          | 0        |
| LOC100287881 | 0          | 0        |
| LOC100287884 | 0          | 0.078829 |
| LOC100287885 | 0          | 0        |
| LOC100287886 | 0          | 0        |
| LOC100287887 | 4.54097385 | 2.932639 |
| LOC100287888 | 0          | 0        |
| LOC100287889 | 0          | 0        |
| LOC100287890 | 0.01937819 | 0.022014 |
| LOC100287891 | 0.08181063 | 0.046469 |
| LOC100287892 | 0          | 0        |
| LOC100287893 | 0          | 0        |
| LOC100287894 | 0          | 0        |
| LOC100287895 | 0          | 0        |
| LOC100287896 | 0.36557201 | 0.280605 |
| LOC100287897 | 0.01863948 | 0        |
| LOC100287898 | 0.01184526 | 0.026913 |
| LOC100287899 | 0          | 0        |
| LOC100287900 | 0          | 0        |
| LOC100287901 | 0.89925041 | 0.681042 |
| LOC100287902 | 0          | 0        |
| LOC100287903 | 0          | 0        |
| LOC100287904 | 0          | 0        |
| LOC100287906 | 0          | 0        |
| LOC100287907 | 0.01284382 | 0        |
| LOC100287908 | 0          | 0        |
| LOC100287909 | 0          | 0        |
| LOC100287910 | 0.0257243  | 0.009741 |
| LOC100287911 | 0.1300153  | 0.253199 |
| LOC100287912 | 0          | 0        |
| LOC100287913 | 0.00526028 | 0.005976 |
| LOC100287914 | 0          | 0.019756 |
| LOC100287917 | 0          | 0.102658 |
| LOC100287918 | 0.07874656 | 0.044729 |
| LOC100287919 | 0          | 0        |
| LOC100287920 | 0.01309174 | 0.014872 |
| LOC100287921 | 0.05697922 | 0        |

|              |            |          |
|--------------|------------|----------|
| LOC100287922 | 0          | 0        |
| LOC100287923 | 0          | 0        |
| LOC100287924 | 0          | 0        |
| LOC100287925 | 0          | 0        |
| LOC100287926 | 0          | 0.020207 |
| LOC100287927 | 0.36814782 | 0.046469 |
| LOC100287928 | 0          | 0        |
| LOC100287929 | 0          | 0        |
| LOC100287930 | 0          | 0        |
| LOC100287931 | 0          | 0        |
| LOC100287932 | 8.40108274 | 7.710401 |
| LOC100287933 | 0          | 0        |
| LOC100287934 | 0          | 0        |
| LOC100287935 | 0          | 0.031222 |
| LOC100287936 | 0          | 0.047111 |
| LOC100287937 | 0          | 0        |
| LOC100287938 | 0.01790914 | 0.061035 |
| LOC100287939 | 0          | 0        |
| LOC100287940 | 0.01979786 | 0.022491 |
| LOC100287942 | 0.06433044 | 0.07308  |
| LOC100287943 | 0          | 0        |
| LOC100287944 | 0.26095269 | 0.127048 |
| LOC100287945 | 0          | 0        |
| LOC100287946 | 0.03650231 | 0        |
| LOC100287947 | 0          | 0        |
| LOC100287948 | 0          | 0        |
| LOC100287949 | 0          | 0        |
| LOC100287950 | 4.23057721 | 3.960726 |
| LOC100287951 | 0          | 0.068049 |
| LOC100287952 | 0          | 0        |
| LOC100287955 | 0          | 0        |
| LOC100287956 | 0          | 0.037089 |
| LOC100287957 | 0          | 0        |
| LOC100287958 | 0          | 0        |
| LOC100287959 | 0          | 0        |
| LOC100287960 | 0.1121351  | 0.127387 |
| LOC100287961 | 0          | 0        |
| LOC100287962 | 0          | 0        |
| LOC100287963 | 0.02461983 | 0.055937 |
| LOC100287964 | 0          | 0        |
| LOC100287965 | 0          | 0        |
| LOC100287966 | 0          | 0        |
| LOC100287967 | 0.13099895 | 0.074408 |
| LOC100287968 | 0.13477776 | 0.15311  |
| LOC100287969 | 0          | 0        |
| LOC100287970 | 0          | 0        |
| LOC100287971 | 0          | 0.052552 |

|              |            |          |
|--------------|------------|----------|
| LOC100287972 | 0          | 0        |
| LOC100287973 | 0          | 0.027517 |
| LOC100287974 | 0          | 0        |
| LOC100287975 | 0          | 0        |
| LOC100287976 | 0          | 0.030158 |
| LOC100287977 | 0          | 0        |
| LOC100287978 | 0          | 0        |
| LOC100287980 | 0          | 0        |
| LOC100287981 | 1.58846553 | 1.628113 |
| LOC100287982 | 0          | 0.048845 |
| LOC100287983 | 0          | 0        |
| LOC100287984 | 0          | 0        |
| LOC100287985 | 0          | 0        |
| LOC100287986 | 0.01910815 | 0.014471 |
| LOC100287987 | 0          | 0        |
| LOC100287988 | 0.07420705 | 0.0843   |
| LOC100287991 | 0          | 0        |
| LOC100287992 | 0          | 0        |
| LOC100287993 | 0.74722377 | 0.731774 |
| LOC100287994 | 0.05109436 | 0.058044 |
| LOC100287995 | 0.27930329 | 0.211529 |
| LOC100287996 | 0          | 0        |
| LOC100287997 | 0          | 0        |
| LOC100287998 | 0          | 0.031511 |
| LOC100287999 | 0          | 0        |
| LOC100288000 | 0.03885585 | 0.019618 |
| LOC100288001 | 0          | 0        |
| LOC100288002 | 0.11390698 | 0.16175  |
| LOC100288003 | 0          | 0        |
| LOC100288004 | 0          | 0        |
| LOC100288005 | 0          | 0        |
| LOC100288006 | 0          | 0.124272 |
| LOC100288007 | 1.32621318 | 1.469853 |
| LOC100288008 | 0          | 0        |
| LOC100288009 | 0          | 0.027173 |
| LOC100288010 | 0          | 0        |
| LOC100288011 | 0          | 0        |
| LOC100288012 | 0          | 0        |
| LOC100288013 | 0          | 0        |
| LOC100288014 | 0          | 0        |
| LOC100288015 | 0          | 0        |
| LOC100288016 | 0          | 0        |
| LOC100288017 | 0          | 0        |
| LOC100288018 | 0          | 0        |
| LOC100288020 | 0          | 0.019139 |
| LOC100288021 | 0          | 0        |
| LOC100288022 | 0          | 0        |



|              |            |          |
|--------------|------------|----------|
| LOC100288023 | 0          | 0.049349 |
| LOC100288024 | 0.16074412 | 0.304346 |
| LOC100288026 | 0          | 0        |
| LOC100288027 | 0          | 0        |
| LOC100288028 | 0          | 0        |
| LOC100288029 | 0          | 0        |
| LOC100288030 | 0.0736697  | 0.016738 |
| LOC100288031 | 0          | 0        |
| LOC100288032 | 0          | 0        |
| LOC100288033 | 0.01350374 | 0        |
| LOC100288034 | 0          | 0        |
| LOC100288035 | 0          | 0        |
| LOC100288036 | 0.18968029 | 0.190617 |
| LOC100288037 | 0          | 0        |
| LOC100288038 | 0          | 0        |
| LOC100288039 | 0          | 0        |
| LOC100288040 | 0          | 0        |
| LOC100288041 | 0.01030906 | 0.011711 |
| LOC100288042 | 0          | 0        |
| LOC100288043 | 0          | 0.033736 |
| LOC100288044 | 0          | 0        |
| LOC100288045 | 0.01528004 | 0.017358 |
| LOC100288046 | 0          | 0        |
| LOC100288047 | 0          | 0        |
| LOC100288050 | 0          | 0.012685 |
| LOC100288051 | 0.29834301 | 0.410274 |
| LOC100288052 | 0.02351827 | 0.053434 |
| LOC100288054 | 0.05816136 | 0.264289 |
| LOC100288055 | 0.02325811 | 0.026422 |
| LOC100288056 | 0          | 0        |
| LOC100288057 | 0          | 0        |
| LOC100288058 | 0.29435463 | 0.191081 |
| LOC100288059 | 0.0264636  | 0        |
| LOC100288060 | 0          | 0        |
| LOC100288061 | 0          | 0        |
| LOC100288062 | 0          | 0        |
| LOC100288063 | 0          | 0        |
| LOC100288064 | 0.20568957 | 0.13874  |
| LOC100288065 | 0          | 0        |
| LOC100288066 | 0          | 0        |
| LOC100288067 | 0.25392912 | 0.173081 |
| LOC100288068 | 0          | 0        |
| LOC100288069 | 3.51949742 | 4.539628 |
| LOC100288070 | 0          | 0        |
| LOC100288071 | 0          | 0        |
| LOC100288072 | 0.01656842 | 0        |
| LOC100288073 | 0          | 0        |

|              |            |          |
|--------------|------------|----------|
| LOC100288074 | 0.33110757 | 0.300915 |
| LOC100288075 | 0          | 0        |
| LOC100288076 | 0          | 0        |
| LOC100288077 | 0          | 0.045323 |
| LOC100288078 | 0          | 0        |
| LOC100288079 | 0          | 0        |
| LOC100288080 | 0          | 0        |
| LOC100288082 | 0          | 0        |
| LOC100288083 | 0          | 0        |
| LOC100288084 | 0          | 0        |
| LOC100288086 | 0.10460364 | 0        |
| LOC100288087 | 0          | 0        |
| LOC100288088 | 0          | 0        |
| LOC100288089 | 0.12704127 | 0.03608  |
| LOC100288090 | 0          | 0.049096 |
| LOC100288091 | 0.02203913 | 0        |
| LOC100288092 | 0          | 0        |
| LOC100288093 | 0          | 0        |
| LOC100288094 | 0          | 0.051366 |
| LOC100288095 | 0          | 0        |
| LOC100288096 | 0.01797037 | 0        |
| LOC100288097 | 0          | 0        |
| LOC100288098 | 0          | 0        |
| LOC100288099 | 0.04837116 | 0.027475 |
| LOC100288100 | 0.09181367 | 0.078226 |
| LOC100288101 | 0          | 0        |
| LOC100288102 | 1.19171916 | 0.918658 |
| LOC100288103 | 0.34079113 | 0.218821 |
| LOC100288104 | 0.25671955 | 0.145819 |
| LOC100288105 | 0          | 0        |
| LOC100288106 | 0          | 0        |
| LOC100288107 | 0          | 0        |
| LOC100288108 | 0.02022639 | 0.022977 |
| LOC100288109 | 1.94415555 | 1.78842  |
| LOC100288110 | 0.26360746 | 0.407269 |
| LOC100288111 | 0          | 0        |
| LOC100288112 | 0          | 0        |
| LOC100288113 | 0          | 0        |
| LOC100288114 | 0.19576658 | 0.244633 |
| LOC100288115 | 0          | 0        |
| LOC100288116 | 0          | 0        |
| LOC100288117 | 0.26886612 | 1.069027 |
| LOC100288118 | 0.15784783 | 0.197249 |
| LOC100288120 | 0          | 0        |
| LOC100288121 | 0.01994813 | 0        |
| LOC100288122 | 0          | 0        |
| LOC100288123 | 0          | 0        |

|              |            |          |
|--------------|------------|----------|
| LOC100288125 | 0          | 0        |
| LOC100288126 | 0          | 0        |
| LOC100288127 | 0.08014739 | 0        |
| LOC100288128 | 0.01777289 | 0        |
| LOC100288129 | 0          | 0        |
| LOC100288130 | 0          | 0.040415 |
| LOC100288131 | 0.02203913 | 0        |
| LOC100288132 | 0          | 0        |
| LOC100288133 | 0.08174701 | 0.05572  |
| LOC100288134 | 0          | 0        |
| LOC100288135 | 0.03959573 | 0.014994 |
| LOC100288136 | 0          | 0        |
| LOC100288137 | 0          | 0        |
| LOC100288138 | 0          | 0        |
| LOC100288139 | 0          | 0        |
| LOC100288140 | 0          | 0        |
| LOC100288141 | 0          | 0        |
| LOC100288142 | 0.71459511 | 0.533636 |
| LOC100288143 | 0.63204377 | 0.605822 |
| LOC100288144 | 0          | 0        |
| LOC100288145 | 0          | 0        |
| LOC100288146 | 0          | 0        |
| LOC100288147 | 0.07974209 | 0        |
| LOC100288148 | 0          | 0        |
| LOC100288149 | 0          | 0        |
| LOC100288150 | 0          | 0.069535 |
| LOC100288151 | 0          | 0        |
| LOC100288152 | 0          | 0.007757 |
| LOC100288153 | 0          | 0        |
| LOC100288154 | 0          | 0        |
| LOC100288155 | 0.03788348 | 0        |
| LOC100288156 | 0          | 0        |
| LOC100288158 | 0          | 0        |
| LOC100288159 | 0.05596805 | 0        |
| LOC100288160 | 0          | 0        |
| LOC100288161 | 0.16791063 | 0.182456 |
| LOC100288162 | 0.62004997 | 0.320176 |
| LOC100288163 | 60.2036799 | 62.38843 |
| LOC100288164 | 6.5492438  | 5.002789 |
| LOC100288165 | 0          | 0        |
| LOC100288166 | 1.15612434 | 1.374463 |
| LOC100288167 | 0          | 0        |
| LOC100288168 | 0.01412993 | 0.032104 |
| LOC100288169 | 0.1222403  | 0.138867 |
| LOC100288170 | 0          | 0        |
| LOC100288171 | 0          | 0        |
| LOC100288172 | 0          | 0        |

|              |            |          |
|--------------|------------|----------|
| LOC100288173 | 0          | 0        |
| LOC100288174 | 0          | 0        |
| LOC100288175 | 0          | 0        |
| LOC100288176 | 0          | 0        |
| LOC100288177 | 0          | 0        |
| LOC100288178 | 0.02894058 | 0        |
| LOC100288179 | 0          | 0        |
| LOC100288180 | 0          | 0        |
| LOC100288181 | 0.21728306 | 0.01452  |
| LOC100288182 | 0.00780595 | 0.004434 |
| LOC100288183 | 0          | 0        |
| LOC100288184 | 0.21381693 | 0.040483 |
| LOC100288185 | 0          | 0        |
| LOC100288187 | 0          | 0        |
| LOC100288189 | 0          | 0        |
| LOC100288190 | 0.09600608 | 0.054532 |
| LOC100288191 | 0.29529959 | 0.246008 |
| LOC100288192 | 0          | 0        |
| LOC100288193 | 0          | 0        |
| LOC100288194 | 0.02945756 | 0.158955 |
| LOC100288195 | 0          | 0        |
| LOC100288196 | 0.18561689 | 0.230033 |
| LOC100288197 | 0.02827886 | 0.032125 |
| LOC100288198 | 0.00702483 | 0        |
| LOC100288199 | 0          | 0        |
| LOC100288200 | 0          | 0        |
| LOC100288201 | 0          | 0        |
| LOC100288202 | 0.02705963 | 0        |
| LOC100288203 | 1.55962549 | 1.480204 |
| LOC100288204 | 0.05784135 | 0.032854 |
| LOC100288205 | 0.03850793 | 0.109364 |
| LOC100288206 | 0.10672757 | 0        |
| LOC100288207 | 0          | 0        |
| LOC100288208 | 0          | 0        |
| LOC100288209 | 0.04074677 | 0.023144 |
| LOC100288210 | 0          | 0.041757 |
| LOC100288211 | 0          | 0.066905 |
| LOC100288212 | 0.03452435 | 0        |
| LOC100288213 | 0          | 0.028537 |
| LOC100288214 | 34.3442971 | 27.14783 |
| LOC100288216 | 0          | 0        |
| LOC100288217 | 0          | 0        |
| LOC100288218 | 0          | 0        |
| LOC100288219 | 0.01753572 | 0        |
| LOC100288221 | 0.02896051 | 0        |
| LOC100288222 | 0          | 0        |
| LOC100288223 | 0          | 0        |

|              |            |          |
|--------------|------------|----------|
| LOC100288224 | 0.08455227 | 0.160088 |
| LOC100288225 | 0.05667205 | 0.06438  |
| LOC100288226 | 0.16686771 | 0.122659 |
| LOC100288227 | 0          | 0        |
| LOC100288228 | 0          | 0.034818 |
| LOC100288229 | 0.19738388 | 0.394647 |
| LOC100288230 | 0          | 0        |
| LOC100288231 | 0          | 0        |
| LOC100288232 | 0          | 0.011991 |
| LOC100288233 | 0          | 0        |
| LOC100288234 | 0          | 0        |
| LOC100288235 | 0          | 0        |
| LOC100288236 | 0          | 0        |
| LOC100288237 | 0          | 0        |
| LOC100288238 | 0.01099076 | 0        |
| LOC100288239 | 0          | 0        |
| LOC100288240 | 0          | 0        |
| LOC100288241 | 0          | 0        |
| LOC100288242 | 0          | 0        |
| LOC100288243 | 0.02866439 | 0.081408 |
| LOC100288244 | 0          | 0.070666 |
| LOC100288245 | 0.11861964 | 0.235819 |
| LOC100288246 | 0          | 0        |
| LOC100288247 | 0          | 0        |
| LOC100288248 | 0          | 0        |
| LOC100288249 | 0.02770136 | 0        |
| LOC100288250 | 0          | 0        |
| LOC100288251 | 0          | 0        |
| LOC100288252 | 0          | 0        |
| LOC100288253 | 0.38614015 | 0.28513  |
| LOC100288254 | 0          | 0        |
| LOC100288256 | 0.05542706 | 0.041977 |
| LOC100288257 | 0.07563069 | 0.085918 |
| LOC100288258 | 0          | 0        |
| LOC100288260 | 0.01622325 | 0.01843  |
| LOC100288261 | 0.03229698 | 0.183449 |
| LOC100288262 | 0          | 0        |
| LOC100288263 | 4.79245497 | 5.612419 |
| LOC100288264 | 0          | 0        |
| LOC100288265 | 0          | 0        |
| LOC100288266 | 0          | 0        |
| LOC100288267 | 0          | 0.018822 |
| LOC100288268 | 0          | 0        |
| LOC100288269 | 0          | 0        |
| LOC100288270 | 0          | 0.030063 |
| LOC100288271 | 0.02766491 | 0        |
| LOC100288272 | 0          | 0        |

|              |            |          |
|--------------|------------|----------|
| LOC100288273 | 0.21417994 | 0.081104 |
| LOC100288274 | 0.02564065 | 0        |
| LOC100288275 | 0          | 0        |
| LOC100288276 | 0          | 0        |
| LOC100288277 | 0          | 0        |
| LOC100288278 | 0.01014736 | 0        |
| LOC100288279 | 0          | 0        |
| LOC100288280 | 0.03138109 | 0.356494 |
| LOC100288281 | 0          | 0        |
| LOC100288282 | 0          | 0        |
| LOC100288283 | 0          | 0        |
| LOC100288284 | 0.07801607 | 0        |
| LOC100288285 | 0          | 0.009841 |
| LOC100288286 | 0          | 0.06589  |
| LOC100288287 | 0          | 0        |
| LOC100288288 | 0          | 0        |
| LOC100288290 | 0          | 0        |
| LOC100288291 | 0          | 0        |
| LOC100288292 | 0          | 0        |
| LOC100288294 | 0.02136721 | 0        |
| LOC100288295 | 0          | 0        |
| LOC100288296 | 0.84029809 | 0.751487 |
| LOC100288297 | 0.30560074 | 0.173584 |
| LOC100288298 | 0          | 0        |
| LOC100288299 | 6.16513793 | 6.947888 |
| LOC100288300 | 0          | 0        |
| LOC100288301 | 0          | 0        |
| LOC100288302 | 0.01340047 | 0.152231 |
| LOC100288303 | 0.05165929 | 0.058686 |
| LOC100288304 | 0          | 0        |
| LOC100288305 | 0          | 0        |
| LOC100288306 | 0.36886546 | 0        |
| LOC100288307 | 0          | 0        |
| LOC100288308 | 0          | 0        |
| LOC100288309 | 0.57093579 | 0.366596 |
| LOC100288310 | 0          | 0        |
| LOC100288311 | 0          | 0        |
| LOC100288312 | 9.19895636 | 8.138479 |
| LOC100288313 | 0.05006031 | 0.170608 |
| LOC100288314 | 0.01394253 | 0        |
| LOC100288315 | 0          | 0.017308 |
| LOC100288316 | 0          | 0        |
| LOC100288317 | 0          | 0        |
| LOC100288318 | 0          | 0        |
| LOC100288319 | 0          | 0        |
| LOC100288320 | 0          | 0        |
| LOC100288321 | 0          | 0.08654  |

|              |            |          |
|--------------|------------|----------|
| LOC100288322 | 1.92792827 | 1.832018 |
| LOC100288323 | 0          | 0        |
| LOC100288324 | 0          | 0        |
| LOC100288326 | 0.27134764 | 0.121434 |
| LOC100288327 | 0          | 0        |
| LOC100288328 | 0          | 0        |
| LOC100288330 | 0          | 0        |
| LOC100288331 | 0.14541523 | 0.165194 |
| LOC100288332 | 0.22896284 | 0.312127 |
| LOC100288333 | 0          | 0        |
| LOC100288334 | 0          | 0        |
| LOC100288335 | 0.58849527 | 0.486211 |
| LOC100288336 | 0          | 0.015735 |
| LOC100288337 | 0          | 0        |
| LOC100288338 | 0          | 0        |
| LOC100288339 | 0          | 0        |
| LOC100288340 | 0          | 0        |
| LOC100288341 | 0.96787997 | 1.234853 |
| LOC100288342 | 0          | 0.026598 |
| LOC100288343 | 0          | 0        |
| LOC100288344 | 0.02505999 | 0.028469 |
| LOC100288345 | 0          | 0        |
| LOC100288346 | 0.03264803 | 0        |
| LOC100288347 | 0          | 0        |
| LOC100288348 | 0.01168074 | 0        |
| LOC100288349 | 0          | 0.01004  |
| LOC100288350 | 1.79983378 | 2.369923 |
| LOC100288351 | 0          | 0        |
| LOC100288352 | 0          | 0.016128 |
| LOC100288353 | 0          | 0        |
| LOC100288354 | 0          | 0        |
| LOC100288356 | 0          | 0        |
| LOC100288357 | 0.14597545 | 0.149247 |
| LOC100288358 | 0.13420424 | 0.228687 |
| LOC100288359 | 0          | 0        |
| LOC100288360 | 0.03708171 | 0.042125 |
| LOC100288361 | 0.01862297 | 0        |
| LOC100288362 | 0          | 0        |
| LOC100288364 | 0          | 0.032675 |
| LOC100288365 | 0          | 0        |
| LOC100288366 | 0.34138551 | 0.342194 |
| LOC100288367 | 0.02510487 | 0.064169 |
| LOC100288368 | 0.45094544 | 0.448246 |
| LOC100288369 | 0          | 0        |
| LOC100288370 | 0          | 0        |
| LOC100288371 | 0          | 0        |
| LOC100288372 | 0.08074244 | 0.055035 |

|              |            |          |
|--------------|------------|----------|
| LOC100288373 | 0          | 0.028067 |
| LOC100288374 | 0          | 0        |
| LOC100288375 | 0          | 0        |
| LOC100288376 | 0.23020435 | 0.43586  |
| LOC100288377 | 0          | 0        |
| LOC100288378 | 0          | 0        |
| LOC100288379 | 0          | 0        |
| LOC100288380 | 0          | 0        |
| LOC100288381 | 0          | 0.03172  |
| LOC100288382 | 0          | 0.034024 |
| LOC100288383 | 0          | 0        |
| LOC100288384 | 0          | 0        |
| LOC100288385 | 0          | 0        |
| LOC100288386 | 0          | 0        |
| LOC100288387 | 0.16185782 | 0.018387 |
| LOC100288388 | 0          | 0        |
| LOC100288389 | 0          | 0        |
| LOC100288390 | 0          | 0        |
| LOC100288391 | 0.01448026 | 0        |
| LOC100288392 | 0          | 0        |
| LOC100288393 | 0          | 0.02736  |
| LOC100288394 | 0.07398076 | 0.100852 |
| LOC100288395 | 0          | 0        |
| LOC100288396 | 0          | 0        |
| LOC100288399 | 0          | 0        |
| LOC100288400 | 0          | 0        |
| LOC100288401 | 0          | 0        |
| LOC100288403 | 0          | 0        |
| LOC100288404 | 0          | 0        |
| LOC100288405 | 0          | 0        |
| LOC100288406 | 0.07319523 | 0.027717 |
| LOC100288407 | 0          | 0        |
| LOC100288408 | 0.29474763 | 0.111613 |
| LOC100288409 | 0          | 0        |
| LOC100288410 | 1.75469897 | 1.164267 |
| LOC100288411 | 0          | 0        |
| LOC100288412 | 0          | 0        |
| LOC100288413 | 0          | 0        |
| LOC100288414 | 0          | 0        |
| LOC100288415 | 0          | 0        |
| LOC100288416 | 0          | 0        |
| LOC100288417 | 0          | 0        |
| LOC100288418 | 130.786372 | 124.5449 |
| LOC100288419 | 20.0931734 | 27.41493 |
| LOC100288420 | 0          | 0        |
| LOC100288421 | 0          | 0        |
| LOC100288422 | 0          | 0        |



|              |            |          |
|--------------|------------|----------|
| LOC100288423 | 0          | 0        |
| LOC100288424 | 0.05269507 | 0.059862 |
| LOC100288425 | 0          | 0        |
| LOC100288426 | 0.57364485 | 0.481669 |
| LOC100288427 | 0          | 0        |
| LOC100288428 | 0          | 0        |
| LOC100288429 | 0          | 0.024298 |
| LOC100288430 | 0          | 0        |
| LOC100288431 | 0          | 0        |
| LOC100288432 | 14.1848071 | 11.1745  |
| LOC100288434 | 0          | 0        |
| LOC100288436 | 0.04746124 | 0.080875 |
| LOC100288437 | 0          | 0        |
| LOC100288438 | 0.24682886 | 0.229419 |
| LOC100288439 | 0.27094499 | 0.184679 |
| LOC100288440 | 0          | 0        |
| LOC100288441 | 0          | 0        |
| LOC100288442 | 0          | 0        |
| LOC100288443 | 0          | 0        |
| LOC100288444 | 0.02884133 | 0.032764 |
| LOC100288445 | 0          | 0.029199 |
| LOC100288446 | 0.61760231 | 0.335551 |
| LOC100288447 | 0.07103152 | 0        |
| LOC100288448 | 0          | 0        |
| LOC100288449 | 0.06815342 | 0.077423 |
| LOC100288450 | 0          | 0        |
| LOC100288451 | 0          | 0        |
| LOC100288452 | 0.07325899 | 0        |
| LOC100288453 | 0          | 0        |
| LOC100288454 | 0          | 0        |
| LOC100288455 | 0.15199034 | 0.115109 |
| LOC100288456 | 0.76932604 | 0.427052 |
| LOC100288457 | 0.04997108 | 0.014192 |
| LOC100288458 | 0          | 0        |
| LOC100288459 | 0.10605463 | 0.1004   |
| LOC100288460 | 0.10950693 | 0        |
| LOC100288461 | 0.01518074 | 0        |
| LOC100288462 | 0          | 0        |
| LOC100288463 | 0          | 0        |
| LOC100288464 | 0          | 0        |
| LOC100288467 | 0          | 0        |
| LOC100288469 | 0          | 0.025655 |
| LOC100288470 | 0          | 0        |
| LOC100288471 | 0.01396104 | 0.03172  |
| LOC100288472 | 0.0490101  | 0        |
| LOC100288473 | 0          | 0        |
| LOC100288474 | 0.05249771 | 0.059638 |

|              |            |          |
|--------------|------------|----------|
| LOC100288475 | 0.06041762 | 0        |
| LOC100288476 | 0.02685227 | 0.015252 |
| LOC100288477 | 0.15490175 | 0.187702 |
| LOC100288478 | 0.11594852 | 0.043906 |
| LOC100288479 | 0          | 0        |
| LOC100288480 | 0          | 0        |
| LOC100288481 | 0.02459103 | 0.013968 |
| LOC100288482 | 0          | 0        |
| LOC100288483 | 0          | 0        |
| LOC100288484 | 0          | 0        |
| LOC100288485 | 0          | 0        |
| LOC100288486 | 0.04238978 | 0        |
| LOC100288487 | 0          | 0        |
| LOC100288488 | 0          | 0        |
| LOC100288489 | 0.03625057 | 0.123544 |
| LOC100288490 | 0.18374197 | 0.308131 |
| LOC100288491 | 0          | 0        |
| LOC100288492 | 0          | 0        |
| LOC100288495 | 0          | 0        |
| LOC100288496 | 0          | 0.103736 |
| LOC100288497 | 0.03946566 | 0.022417 |
| LOC100288498 | 0.06313913 | 0        |
| LOC100288500 | 0          | 0        |
| LOC100288501 | 0          | 0        |
| LOC100288502 | 0          | 0        |
| LOC100288503 | 0          | 0        |
| LOC100288504 | 0          | 0        |
| LOC100288505 | 0.01314905 | 0.014938 |
| LOC100288506 | 0          | 0        |
| LOC100288507 | 0.24645077 | 0.367463 |
| LOC100288508 | 0.01182527 | 0.026867 |
| LOC100288509 | 0          | 0        |
| LOC100288510 | 0          | 0        |
| LOC100288511 | 0          | 0        |
| LOC100288512 | 0.03353322 | 0.076189 |
| LOC100288513 | 0          | 0        |
| LOC100288514 | 0.03958508 | 0.038545 |
| LOC100288515 | 0          | 0        |
| LOC100288516 | 0          | 0        |
| LOC100288517 | 0          | 0        |
| LOC100288518 | 0          | 0        |
| LOC100288519 | 0.06570416 | 0        |
| LOC100288520 | 0.01251508 | 0        |
| LOC100288521 | 0          | 0        |
| LOC100288522 | 0.4576251  | 0.635396 |
| LOC100288524 | 0          | 0.026898 |
| LOC100288525 | 0.02239119 | 0.050874 |

|              |            |          |
|--------------|------------|----------|
| LOC100288527 | 0          | 0        |
| LOC100288528 | 0          | 0        |
| LOC100288529 | 0          | 0        |
| LOC100288530 | 0          | 0        |
| LOC100288531 | 0          | 0        |
| LOC100288532 | 0          | 0        |
| LOC100288533 | 0          | 0        |
| LOC100288534 | 0.01996708 | 0        |
| LOC100288535 | 1.97905368 | 2.450001 |
| LOC100288536 | 0          | 0        |
| LOC100288537 | 0          | 0        |
| LOC100288538 | 0.02674978 | 0.030388 |
| LOC100288539 | 0.03147505 | 0        |
| LOC100288540 | 1.55640864 | 1.30777  |
| LOC100288541 | 11.3960827 | 12.92606 |
| LOC100288542 | 0          | 0        |
| LOC100288543 | 0          | 0        |
| LOC100288544 | 0.01670002 | 0.037943 |
| LOC100288545 | 0.16978733 | 0.321468 |
| LOC100288546 | 0.72967087 | 0.905669 |
| LOC100288547 | 0          | 0        |
| LOC100288548 | 0.11778897 | 0.100358 |
| LOC100288549 | 0          | 0        |
| LOC100288550 | 0.05978767 | 0.1132   |
| LOC100288551 | 0          | 0        |
| LOC100288552 | 0          | 0        |
| LOC100288553 | 0          | 0        |
| LOC100288554 | 0          | 0        |
| LOC100288555 | 0          | 0        |
| LOC100288556 | 0.31856562 | 0.180948 |
| LOC100288558 | 0          | 0        |
| LOC100288559 | 0          | 0        |
| LOC100288560 | 0          | 0        |
| LOC100288562 | 0          | 0        |
| LOC100288563 | 0          | 0        |
| LOC100288564 | 0          | 0        |
| LOC100288565 | 0.03857859 | 0        |
| LOC100288566 | 0          | 0        |
| LOC100288567 | 0          | 0        |
| LOC100288568 | 0          | 0        |
| LOC100288569 | 0.03539618 | 0        |
| LOC100288570 | 0          | 0        |
| LOC100288571 | 0.0173048  | 0.058976 |
| LOC100288572 | 0.33267929 | 0.188964 |
| LOC100288573 | 0          | 0        |
| LOC100288574 | 0.04066795 | 0.138598 |
| LOC100288575 | 0.09316986 | 0.070562 |

|              |            |          |
|--------------|------------|----------|
| LOC100288576 | 0.18796592 | 0.183028 |
| LOC100288577 | 0          | 0.03035  |
| LOC100288578 | 0          | 0        |
| LOC100288579 | 0.05084723 | 0.028882 |
| LOC100288580 | 0          | 0        |
| LOC100288581 | 0          | 0        |
| LOC100288582 | 0          | 0        |
| LOC100288583 | 0.25690115 | 0.384005 |
| LOC100288584 | 0          | 0        |
| LOC100288585 | 0          | 0.025222 |
| LOC100288586 | 0          | 0        |
| LOC100288587 | 0.05066345 | 0.172663 |
| LOC100288588 | 0.10893954 | 0        |
| LOC100288589 | 0          | 0        |
| LOC100288590 | 0          | 0.024249 |
| LOC100288591 | 0.01476498 | 0.033547 |
| LOC100288592 | 0          | 0        |
| LOC100288594 | 2.40177002 | 1.833875 |
| LOC100288596 | 0          | 0        |
| LOC100288597 | 0          | 0.043666 |
| LOC100288598 | 0.79105206 | 0.614864 |
| LOC100288599 | 0.0324465  | 0        |
| LOC100288600 | 0.01529115 | 0        |
| LOC100288601 | 0          | 0.015881 |
| LOC100288602 | 0          | 0        |
| LOC100288603 | 0.18504142 | 0.078829 |
| LOC100288604 | 0          | 0        |
| LOC100288605 | 0          | 0        |
| LOC100288606 | 0          | 0        |
| LOC100288607 | 0          | 0        |
| LOC100288608 | 0.01390564 | 0        |
| LOC100288609 | 0.03463811 | 0.078699 |
| LOC100288611 | 0          | 0        |
| LOC100288612 | 0.79754278 | 0.398251 |
| LOC100288613 | 0          | 0        |
| LOC100288614 | 0          | 0        |
| LOC100288615 | 0.04580682 | 0.052037 |
| LOC100288616 | 0.20047991 | 0.170811 |
| LOC100288617 | 10.1541844 | 12.69074 |
| LOC100288618 | 0.01393329 | 0        |
| LOC100288619 | 0          | 0        |
| LOC100288620 | 0          | 0        |
| LOC100288621 | 0          | 0        |
| LOC100288622 | 0          | 0        |
| LOC100288623 | 0          | 0        |
| LOC100288624 | 0          | 0        |
| LOC100288625 | 0          | 0        |

|              |            |          |
|--------------|------------|----------|
| LOC100288626 | 0          | 0        |
| LOC100288628 | 0          | 0        |
| LOC100288629 | 0          | 0        |
| LOC100288630 | 0.10043948 | 0.019017 |
| LOC100288631 | 0.02712946 | 0        |
| LOC100288632 | 0          | 0        |
| LOC100288633 | 0          | 0        |
| LOC100288634 | 0.01609903 | 0.018289 |
| LOC100288635 | 0.01655538 | 0.018807 |
| LOC100288636 | 0          | 0        |
| LOC100288637 | 0          | 0        |
| LOC100288638 | 0.03900804 | 0        |
| LOC100288639 | 0.0270945  | 0.03078  |
| LOC100288640 | 0.01721976 | 0.039124 |
| LOC100288641 | 0          | 0        |
| LOC100288642 | 0.09036675 | 0.068439 |
| LOC100288643 | 0.0215203  | 0        |
| LOC100288644 | 0.05631785 | 0.042652 |
| LOC100288645 | 0.07175881 | 0.013587 |
| LOC100288646 | 0.02251106 | 0.051146 |
| LOC100288647 | 0          | 0        |
| LOC100288648 | 0.16468928 | 0.124726 |
| LOC100288649 | 0          | 0.038524 |
| LOC100288650 | 0.03147505 | 0        |
| LOC100288651 | 0          | 0        |
| LOC100288652 | 0          | 0        |
| LOC100288653 | 0.05296053 | 0        |
| LOC100288654 | 0          | 0        |
| LOC100288655 | 0          | 0        |
| LOC100288656 | 0          | 0        |
| LOC100288658 | 0          | 0.027423 |
| LOC100288659 | 0          | 0        |
| LOC100288660 | 0          | 0        |
| LOC100288661 | 0          | 0        |
| LOC100288662 | 0.03846097 | 0        |
| LOC100288663 | 0          | 0        |
| LOC100288664 | 0          | 0        |
| LOC100288665 | 0          | 0        |
| LOC100288666 | 0          | 0        |
| LOC100288667 | 0          | 0        |
| LOC100288668 | 0          | 0.023602 |
| LOC100288669 | 0          | 0        |
| LOC100288670 | 0.02265661 | 0        |
| LOC100288671 | 0.27885054 | 0.253423 |
| LOC100288672 | 0.42281287 | 0.392991 |
| LOC100288673 | 0          | 0        |
| LOC100288674 | 0          | 0        |

|              |            |          |
|--------------|------------|----------|
| LOC100288675 | 0.01385524 | 0.02361  |
| LOC100288676 | 0.02119489 | 0        |
| LOC100288677 | 0          | 0        |
| LOC100288678 | 0          | 0.007518 |
| LOC100288679 | 0          | 0        |
| LOC100288680 | 0.05349957 | 0        |
| LOC100288681 | 0          | 0        |
| LOC100288682 | 0.16617959 | 0.123119 |
| LOC100288683 | 0          | 0        |
| LOC100288684 | 14.1561856 | 17.12013 |
| LOC100288685 | 0.0330068  | 0        |
| LOC100288686 | 0.96068745 | 0.919857 |
| LOC100288688 | 0          | 0        |
| LOC100288689 | 0          | 0        |
| LOC100288690 | 0          | 0.488559 |
| LOC100288691 | 0.16298706 | 0.092578 |
| LOC100288692 | 0.04618414 | 0.052466 |
| LOC100288693 | 0.40871091 | 0.505443 |
| LOC100288694 | 0          | 0        |
| LOC100288695 | 1.24459339 | 1.017992 |
| LOC100288696 | 0          | 0        |
| LOC100288697 | 0          | 0        |
| LOC100288698 | 0          | 0        |
| LOC100288699 | 0          | 0.030899 |
| LOC100288700 | 0          | 0.037853 |
| LOC100288701 | 0          | 0.01557  |
| LOC100288702 | 0          | 0        |
| LOC100288703 | 0          | 0        |
| LOC100288704 | 4.6776817  | 4.666889 |
| LOC100288705 | 0.03380278 | 0.0384   |
| LOC100288706 | 0.06804314 | 0        |
| LOC100288707 | 0          | 0        |
| LOC100288708 | 0          | 0        |
| LOC100288709 | 0.02551618 | 0        |
| LOC100288712 | 0          | 0        |
| LOC100288713 | 0.59919518 | 0.498366 |
| LOC100288714 | 0          | 0        |
| LOC100288715 | 0          | 0        |
| LOC100288716 | 0          | 0        |
| LOC100288717 | 0.02876242 | 0        |
| LOC100288718 | 0.018063   | 0.02052  |
| LOC100288719 | 0          | 0        |
| LOC100288720 | 0          | 0        |
| LOC100288721 | 0.02277934 | 0.025878 |
| LOC100288722 | 0          | 0.059862 |
| LOC100288723 | 0          | 0        |
| LOC100288724 | 0          | 0        |

|              |            |          |
|--------------|------------|----------|
| LOC100288725 | 0.03413203 | 0.077549 |
| LOC100288726 | 0          | 0        |
| LOC100288727 | 0.03264803 | 0        |
| LOC100288728 | 0.15928281 | 0.090474 |
| LOC100288729 | 0          | 0        |
| LOC100288730 | 4.23833914 | 3.995851 |
| LOC100288731 | 0.0800965  | 0.121321 |
| LOC100288732 | 0          | 0        |
| LOC100288733 | 0          | 0        |
| LOC100288734 | 0.01538064 | 0.017473 |
| LOC100288735 | 0.03625057 | 0.082362 |
| LOC100288736 | 0          | 0        |
| LOC100288737 | 0.13809741 | 0.274541 |
| LOC100288738 | 0          | 0.011229 |
| LOC100288739 | 0          | 0        |
| LOC100288742 | 0          | 0        |
| LOC100288743 | 0          | 0.015673 |
| LOC100288744 | 0.12203758 | 0.03961  |
| LOC100288745 | 0          | 0        |
| LOC100288746 | 0          | 0.029488 |
| LOC100288747 | 0.07482324 | 0.028333 |
| LOC100288748 | 0.04811289 | 0.010931 |
| LOC100288749 | 0.30821072 | 0.487141 |
| LOC100288750 | 0.01020152 | 0        |
| LOC100288751 | 0.15177092 | 0.218391 |
| LOC100288752 | 0.17233878 | 0.06526  |
| LOC100288753 | 0          | 0        |
| LOC100288754 | 0          | 0        |
| LOC100288755 | 0          | 0        |
| LOC100288756 | 0.47784843 | 0.171424 |
| LOC100288757 | 0          | 0        |
| LOC100288758 | 0          | 0.022501 |
| LOC100288759 | 0          | 0        |
| LOC100288760 | 0          | 0        |
| LOC100288761 | 0          | 0.096311 |
| LOC100288762 | 0          | 0        |
| LOC100288763 | 0          | 0        |
| LOC100288764 | 0          | 0        |
| LOC100288765 | 0.07016239 | 0.073063 |
| LOC100288766 | 0          | 0        |
| LOC100288767 | 0          | 0        |
| LOC100288768 | 0          | 0        |
| LOC100288769 | 0          | 0        |
| LOC100288770 | 0          | 0        |
| LOC100288771 | 0          | 0        |
| LOC100288772 | 0          | 0        |
| LOC100288775 | 0.00753866 | 0        |

|              |            |          |
|--------------|------------|----------|
| LOC100288776 | 0          | 0        |
| LOC100288777 | 0          | 0        |
| LOC100288778 | 0          | 0        |
| LOC100288779 | 0.03446776 | 0        |
| LOC100288780 | 1.29285516 | 1.033071 |
| LOC100288781 | 1.09901044 | 0.859618 |
| LOC100288782 | 0          | 0        |
| LOC100288783 | 0          | 0        |
| LOC100288784 | 0          | 0        |
| LOC100288785 | 0          | 0        |
| LOC100288786 | 0.06429765 | 0.073043 |
| LOC100288787 | 0          | 0        |
| LOC100288788 | 0.0425614  | 0.145051 |
| LOC100288789 | 0          | 0.041075 |
| LOC100288790 | 3.9729394  | 3.57516  |
| LOC100288791 | 0          | 0        |
| LOC100288792 | 0          | 0.017258 |
| LOC100288793 | 0          | 0        |
| LOC100288794 | 0.19676112 | 0.063864 |
| LOC100288795 | 2.70623072 | 2.94294  |
| LOC100288796 | 1.01486382 | 1.403532 |
| LOC100288797 | 0.00540219 | 0        |
| LOC100288798 | 0.31381091 | 0.203711 |
| LOC100288799 | 0          | 0        |
| LOC100288800 | 0          | 0        |
| LOC100288801 | 0.01834671 | 0        |
| LOC100288802 | 0.10460364 | 0.178247 |
| LOC100288803 | 0          | 0        |
| LOC100288807 | 1.03617269 | 0.829537 |
| LOC100288808 | 0          | 0        |
| LOC100288809 | 0          | 0        |
| LOC100288810 | 0          | 0        |
| LOC100288811 | 0          | 0        |
| LOC100288812 | 0          | 0.03619  |
| LOC100288813 | 0          | 0        |
| LOC100288814 | 0.03259741 | 0        |
| LOC100288815 | 0          | 0        |
| LOC100288816 | 0          | 0        |
| LOC100288817 | 0.02229622 | 0        |
| LOC100288818 | 0          | 0.01354  |
| LOC100288819 | 0          | 0        |
| LOC100288820 | 0          | 0        |
| LOC100288821 | 0          | 0        |
| LOC100288822 | 0.15194458 | 0.129459 |
| LOC100288823 | 0          | 0        |
| LOC100288824 | 0.03695137 | 0        |
| LOC100288825 | 0          | 0        |



|              |            |          |
|--------------|------------|----------|
| LOC100288826 | 0          | 0        |
| LOC100288827 | 0          | 0        |
| LOC100288828 | 0          | 0        |
| LOC100288829 | 0          | 0        |
| LOC100288830 | 0          | 0        |
| LOC100288831 | 0          | 0        |
| LOC100288832 | 0.08045407 | 0.030466 |
| LOC100288833 | 0.08165177 | 0.046379 |
| LOC100288834 | 0          | 0        |
| LOC100288835 | 0.0218786  | 0        |
| LOC100288838 | 0          | 0        |
| LOC100288839 | 0          | 0        |
| LOC100288840 | 0.02355779 | 0.066905 |
| LOC100288841 | 0          | 0        |
| LOC100288842 | 0.21804047 | 0.26539  |
| LOC100288843 | 0          | 0        |
| LOC100288844 | 0          | 0        |
| LOC100288845 | 0          | 0        |
| LOC100288846 | 0          | 0        |
| LOC100288847 | 0          | 0.053464 |
| LOC100288848 | 0          | 0        |
| LOC100288849 | 0.10745484 | 0        |
| LOC100288850 | 0.05755859 | 0.046705 |
| LOC100288851 | 0          | 0        |
| LOC100288852 | 0.12278944 | 0.096571 |
| LOC100288853 | 0          | 0        |
| LOC100288854 | 0          | 0        |
| LOC100288855 | 0          | 0        |
| LOC100288856 | 0.03038343 | 0        |
| LOC100288857 | 0.02441966 | 0.055482 |
| LOC100288858 | 0          | 0        |
| LOC100288859 | 1.17899052 | 1.116127 |
| LOC100288860 | 0.00773559 | 0.008788 |
| LOC100288861 | 0          | 0        |
| LOC100288862 | 0.81519862 | 0.578799 |
| LOC100288863 | 0          | 0        |
| LOC100288864 | 0.008242   | 0        |
| LOC100288865 | 0          | 0        |
| LOC100288866 | 0.05697922 | 0.064729 |
| LOC100288867 | 0          | 0        |
| LOC100288868 | 0          | 0        |
| LOC100288869 | 0.0148694  | 0        |
| LOC100288870 | 0          | 0        |
| LOC100288871 | 0          | 0        |
| LOC100288872 | 0          | 0        |
| LOC100288875 | 0          | 0        |
| LOC100288876 | 0          | 0        |

|              |            |          |
|--------------|------------|----------|
| LOC100288877 | 0.03078379 | 0        |
| LOC100288878 | 0          | 0        |
| LOC100288879 | 0          | 0        |
| LOC100288880 | 0.0330587  | 0        |
| LOC100288881 | 0          | 0.008752 |
| LOC100288882 | 0          | 0        |
| LOC100288883 | 0          | 0        |
| LOC100288884 | 0          | 0.012299 |
| LOC100288885 | 0          | 0        |
| LOC100288886 | 0          | 0        |
| LOC100288887 | 0.07816108 | 0        |
| LOC100288888 | 0          | 0.045495 |
| LOC100288889 | 0.06738888 | 0        |
| LOC100288890 | 0          | 0        |
| LOC100288891 | 1.73974836 | 1.286946 |
| LOC100288892 | 0          | 0        |
| LOC100288893 | 0.65093904 | 0.724688 |
| LOC100288894 | 0.03195339 | 0.0363   |
| LOC100288895 | 0.00412909 | 0.009381 |
| LOC100288896 | 0.01359983 | 0        |
| LOC100288897 | 0          | 0        |
| LOC100288898 | 0.11720811 | 0.122908 |
| LOC100288899 | 0          | 0        |
| LOC100288900 | 0.02059288 | 0        |
| LOC100288901 | 0          | 0.02541  |
| LOC100288904 | 0          | 0        |
| LOC100288905 | 0          | 0        |
| LOC100288906 | 0          | 0        |
| LOC100288907 | 0.03415051 | 0.077591 |
| LOC100288908 | 0          | 0        |
| LOC100288909 | 0          | 0        |
| LOC100288910 | 0.07464615 | 0.0424   |
| LOC100288911 | 0.57509111 | 0.20906  |
| LOC100288912 | 0.02688661 | 0.183262 |
| LOC100288913 | 0.03539618 | 0        |
| LOC100288914 | 0          | 0        |
| LOC100288915 | 0.07645575 | 0        |
| LOC100288916 | 0.12031663 | 0.170852 |
| LOC100288917 | 0          | 0        |
| LOC100288918 | 0.0296968  | 0.202416 |
| LOC100288919 | 0          | 0        |
| LOC100288920 | 0          | 0        |
| LOC100288921 | 8.06571409 | 4.371783 |
| LOC100288922 | 0          | 0        |
| LOC100288923 | 0          | 0        |
| LOC100288924 | 0          | 0        |
| LOC100288925 | 0.01458067 | 0.016564 |

|              |            |          |
|--------------|------------|----------|
| LOC100288926 | 0.26955553 | 0.187134 |
| LOC100288927 | 0          | 0        |
| LOC100288928 | 0.01039828 | 0.011813 |
| LOC100288931 | 0          | 0        |
| LOC100288932 | 0          | 0        |
| LOC100288933 | 0          | 0        |
| LOC100288934 | 0          | 0        |
| LOC100288935 | 0          | 0        |
| LOC100288936 | 0.0194679  | 0        |
| LOC100288937 | 0.18199115 | 0.206745 |
| LOC100288938 | 0.95482884 | 1.345029 |
| LOC100288939 | 2.01724038 | 1.891738 |
| LOC100288940 | 0.08724204 | 0.059465 |
| LOC100288941 | 0.02206226 | 0.025063 |
| LOC100288942 | 0          | 0        |
| LOC100288943 | 0          | 0.025738 |
| LOC100288944 | 0          | 0        |
| LOC100288945 | 0.14420666 | 0.065528 |
| LOC100288946 | 0          | 0        |
| LOC100288947 | 0          | 0        |
| LOC100288948 | 0          | 0        |
| LOC100288949 | 0          | 0        |
| LOC100288950 | 0          | 0        |
| LOC100288951 | 0          | 0        |
| LOC100288952 | 0          | 0        |
| LOC100288953 | 0.26710947 | 0.130046 |
| LOC100288954 | 0          | 0        |
| LOC100288955 | 0          | 0        |
| LOC100288956 | 0          | 0        |
| LOC100288957 | 1.33966711 | 0.634118 |
| LOC100288958 | 0          | 0        |
| LOC100288959 | 0          | 0        |
| LOC100288960 | 0          | 0        |
| LOC100288961 | 0          | 0        |
| LOC100288962 | 0          | 0        |
| LOC100288963 | 0          | 0.01551  |
| LOC100288964 | 0          | 0        |
| LOC100288965 | 0          | 0        |
| LOC100288968 | 0          | 0        |
| LOC100288969 | 0          | 0        |
| LOC100288970 | 0          | 0        |
| LOC100288971 | 0          | 0        |
| LOC100288972 | 0.43768364 | 0.375257 |
| LOC100288973 | 0          | 0        |
| LOC100288974 | 0.14450399 | 0        |
| LOC100288975 | 0          | 0        |
| LOC100288976 | 0          | 0.016041 |

|              |            |          |
|--------------|------------|----------|
| LOC100288977 | 1.99607572 | 1.770867 |
| LOC100288978 | 0          | 0        |
| LOC100288979 | 0          | 0        |
| LOC100288980 | 0.04970527 | 0.112932 |
| LOC100288981 | 0          | 0        |
| LOC100288982 | 0          | 0        |
| LOC100288984 | 0          | 0        |
| LOC100288985 | 0          | 0        |
| LOC100288986 | 0          | 0        |
| LOC100288987 | 0          | 0        |
| LOC100288988 | 1.53843885 | 1.446365 |
| LOC100288989 | 0          | 0        |
| LOC100288990 | 0          | 0        |
| LOC100288991 | 0          | 0        |
| LOC100288992 | 0          | 0        |
| LOC100288993 | 0          | 0        |
| LOC100288994 | 0          | 0        |
| LOC100288995 | 0.0091494  | 0.010394 |
| LOC100288996 | 0          | 0        |
| LOC100288997 | 0          | 0.028795 |
| LOC100288998 | 0          | 0        |
| LOC100288999 | 0.01055489 | 0        |
| LOC100289000 | 0          | 0        |
| LOC100289001 | 0          | 0        |
| LOC100289002 | 0.95943492 | 0.591678 |
| LOC100289003 | 19.1314462 | 19.49706 |
| LOC100289005 | 0          | 0        |
| LOC100289006 | 0          | 0        |
| LOC100289007 | 4.06127003 | 3.531994 |
| LOC100289008 | 0.11076563 | 0.160149 |
| LOC100289009 | 0.11536533 | 0.163821 |
| LOC100289010 | 0.13730828 | 0.116988 |
| LOC100289011 | 1.73181619 | 2.059591 |
| LOC100289012 | 0          | 0        |
| LOC100289013 | 0          | 0        |
| LOC100289014 | 0          | 0        |
| LOC100289015 | 2.34404028 | 1.049008 |
| LOC100289016 | 0.40292446 | 0.208058 |
| LOC100289017 | 0          | 0        |
| LOC100289018 | 0.02217862 | 0        |
| LOC100289019 | 2.44436182 | 4.338803 |
| LOC100289020 | 0.02719965 | 0.092698 |
| LOC100289021 | 0          | 0.026807 |
| LOC100289022 | 0          | 0        |
| LOC100289023 | 0          | 0        |
| LOC100289024 | 0          | 0        |
| LOC100289025 | 0          | 0        |

|              |            |          |
|--------------|------------|----------|
| LOC100289027 | 0.04043333 | 0.015311 |
| LOC100289028 | 0          | 0        |
| LOC100289029 | 0          | 0        |
| LOC100289030 | 0          | 0        |
| LOC100289031 | 0.1677553  | 0.158811 |
| LOC100289032 | 0          | 0        |
| LOC100289033 | 0.01895882 | 0        |
| LOC100289034 | 0          | 0        |
| LOC100289035 | 0          | 0        |
| LOC100289036 | 0          | 0        |
| LOC100289037 | 0          | 0        |
| LOC100289039 | 0          | 0.045757 |
| LOC100289040 | 0          | 0        |
| LOC100289041 | 0          | 0        |
| LOC100289042 | 0          | 0        |
| LOC100289043 | 0          | 0.034818 |
| LOC100289044 | 0.09844637 | 0.04793  |
| LOC100289045 | 0          | 0        |
| LOC100289046 | 0.14514528 | 0.141332 |
| LOC100289047 | 0          | 0.011907 |
| LOC100289048 | 0.11980246 | 0.056707 |
| LOC100289049 | 0.09295018 | 0.042237 |
| LOC100289050 | 0          | 0.039942 |
| LOC100289051 | 0          | 0        |
| LOC100289052 | 0          | 0        |
| LOC100289053 | 0          | 0        |
| LOC100289054 | 0          | 0        |
| LOC100289056 | 0          | 0.085508 |
| LOC100289057 | 0          | 0        |
| LOC100289058 | 0.02624885 | 0.059638 |
| LOC100289059 | 0          | 0        |
| LOC100289060 | 0          | 0        |
| LOC100289061 | 0.15853218 | 0.022512 |
| LOC100289062 | 0          | 0        |
| LOC100289063 | 0          | 0        |
| LOC100289064 | 0          | 0        |
| LOC100289065 | 0          | 0        |
| LOC100289066 | 0          | 0        |
| LOC100289067 | 0          | 0        |
| LOC100289069 | 0          | 0        |
| LOC100289070 | 0.04644771 | 0.017588 |
| LOC100289071 | 2.10968457 | 2.031047 |
| LOC100289072 | 0          | 0        |
| LOC100289073 | 0.02318118 | 0.079003 |
| LOC100289074 | 0.08852771 | 0.033523 |
| LOC100289075 | 0.61519901 | 0.534434 |
| LOC100289076 | 0          | 0        |

|              |            |          |
|--------------|------------|----------|
| LOC100289077 | 0.06893551 | 0.015662 |
| LOC100289078 | 0          | 0        |
| LOC100289080 | 0          | 0        |
| LOC100289081 | 0.06063542 | 0.051662 |
| LOC100289082 | 0.03691893 | 0.02097  |
| LOC100289083 | 0.02678386 | 0.030427 |
| LOC100289084 | 0          | 0        |
| LOC100289086 | 0.01996708 | 0        |
| LOC100289088 | 0          | 0        |
| LOC100289089 | 0          | 0        |
| LOC100289090 | 0.04935524 | 0        |
| LOC100289091 | 0          | 0        |
| LOC100289092 | 0.55573562 | 0.868071 |
| LOC100289093 | 0          | 0        |
| LOC100289094 | 0          | 0        |
| LOC100289095 | 0          | 0        |
| LOC100289096 | 0.03308471 | 0        |
| LOC100289098 | 0.25669106 | 0.291605 |
| LOC100289099 | 0          | 0        |
| LOC100289100 | 0          | 0        |
| LOC100289101 | 0          | 0        |
| LOC100289102 | 0          | 0        |
| LOC100289103 | 0.06859814 | 0        |
| LOC100289104 | 0.06522853 | 0.148201 |
| LOC100289105 | 0          | 0        |
| LOC100289106 | 0          | 0        |
| LOC100289107 | 0.02781128 | 0.031594 |
| LOC100289108 | 0          | 0        |
| LOC100289109 | 0          | 0        |
| LOC100289110 | 0          | 0        |
| LOC100289111 | 0          | 0        |
| LOC100289112 | 0          | 0        |
| LOC100289113 | 0          | 0.063694 |
| LOC100289114 | 0          | 0.024053 |
| LOC100289115 | 0          | 0        |
| LOC100289116 | 0          | 0        |
| LOC100289117 | 0          | 0        |
| LOC100289118 | 0          | 0        |
| LOC100289119 | 0          | 0        |
| LOC100289120 | 0.15235747 | 0.242313 |
| LOC100289122 | 0          | 0.022791 |
| LOC100289123 | 0          | 0.035074 |
| LOC100289124 | 0          | 0        |
| LOC100289125 | 0          | 0        |
| LOC100289126 | 0.02716451 | 0        |
| LOC100289127 | 0          | 0        |
| LOC100289128 | 1.70575877 | 1.937769 |

|              |            |          |
|--------------|------------|----------|
| LOC100289129 | 0          | 0        |
| LOC100289130 | 5.46803774 | 6.541606 |
| LOC100289131 | 0          | 0.104759 |
| LOC100289132 | 0.03152224 | 0        |
| LOC100289133 | 0          | 0        |
| LOC100289135 | 1.40481053 | 0.638355 |
| LOC100289136 | 0          | 0        |
| LOC100289137 | 0          | 0        |
| LOC100289138 | 0.13809741 | 0.235321 |
| LOC100289139 | 0          | 0        |
| LOC100289140 | 0          | 0        |
| LOC100289141 | 0          | 0        |
| LOC100289142 | 0          | 0        |
| LOC100289143 | 0          | 0        |
| LOC100289144 | 0          | 0        |
| LOC100289145 | 0          | 0        |
| LOC100289146 | 0          | 0        |
| LOC100289147 | 0          | 0        |
| LOC100289148 | 0          | 0        |
| LOC100289151 | 0.68067618 | 0.601424 |
| LOC100289152 | 0          | 0        |
| LOC100289153 | 7.53070748 | 6.746395 |
| LOC100289154 | 0          | 0        |
| LOC100289155 | 0.29566872 | 0.597128 |
| LOC100289156 | 0          | 0        |
| LOC100289157 | 0          | 0        |
| LOC100289158 | 0          | 0        |
| LOC100289159 | 0          | 0        |
| LOC100289160 | 0          | 0        |
| LOC100289162 | 0.04541108 | 0.025794 |
| LOC100289163 | 0          | 0        |
| LOC100289164 | 0          | 0        |
| LOC100289165 | 0          | 0        |
| LOC100289166 | 0          | 0        |
| LOC100289167 | 0          | 0        |
| LOC100289168 | 0          | 0        |
| LOC100289169 | 0          | 0.044465 |
| LOC100289170 | 0          | 0        |
| LOC100289171 | 0          | 0        |
| LOC100289172 | 0          | 0        |
| LOC100289173 | 0.14016887 | 0.119426 |
| LOC100289174 | 0          | 0        |
| LOC100289175 | 0.036126   | 0.04104  |
| LOC100289176 | 0          | 0        |
| LOC100289177 | 0          | 0        |
| LOC100289178 | 0          | 0        |
| LOC100289179 | 0.0819701  | 0        |

|              |            |          |
|--------------|------------|----------|
| LOC100289180 | 0          | 0        |
| LOC100289181 | 0          | 0        |
| LOC100289182 | 0          | 0        |
| LOC100289183 | 0.0381585  | 0        |
| LOC100289184 | 0          | 0        |
| LOC100289186 | 0          | 0        |
| LOC100289187 | 0.28627531 | 0.307146 |
| LOC100289189 | 0.0462434  | 0.017511 |
| LOC100289190 | 0          | 0        |
| LOC100289191 | 0          | 0        |
| LOC100289192 | 0.05995003 | 0.009729 |
| LOC100289193 | 0          | 0        |
| LOC100289195 | 0          | 0        |
| LOC100289196 | 0.14600924 | 0        |
| LOC100289197 | 0          | 0        |
| LOC100289198 | 0          | 0        |
| LOC100289199 | 0          | 0        |
| LOC100289200 | 0.00886023 | 0        |
| LOC100289201 | 0.18828655 | 0.095065 |
| LOC100289202 | 0          | 0        |
| LOC100289203 | 0.01577294 | 0.017918 |
| LOC100289204 | 1.05012511 | 1.115157 |
| LOC100289205 | 0.01895882 | 0        |
| LOC100289206 | 0          | 0        |
| LOC100289207 | 0          | 0        |
| LOC100289208 | 0.04996514 | 0.034057 |
| LOC100289209 | 0.35787797 | 0.101639 |
| LOC100289210 | 0.65988593 | 0.723791 |
| LOC100289211 | 0          | 0        |
| LOC100289212 | 0          | 0        |
| LOC100289213 | 0          | 0        |
| LOC100289214 | 0          | 0        |
| LOC100289215 | 0          | 0        |
| LOC100289216 | 0          | 0        |
| LOC100289217 | 0          | 0        |
| LOC100289218 | 0          | 0        |
| LOC100289219 | 5.77977671 | 5.218367 |
| LOC100289220 | 0          | 0        |
| LOC100289222 | 0.17883972 | 0.167832 |
| LOC100289223 | 0          | 0.080421 |
| LOC100289224 | 0.58771594 | 0.36674  |
| LOC100289225 | 0          | 0        |
| LOC100289226 | 0          | 0        |
| LOC100289227 | 0          | 0        |
| LOC100289228 | 0          | 0        |
| LOC100289229 | 0          | 0        |
| LOC100289230 | 2.97560442 | 2.460186 |



|              |            |          |
|--------------|------------|----------|
| LOC100289231 | 0          | 0        |
| LOC100289233 | 1.3593964  | 1.235437 |
| LOC100289234 | 0          | 0        |
| LOC100289235 | 0.19528171 | 0.249574 |
| LOC100289236 | 0.1664791  | 0.066749 |
| LOC100289237 | 0          | 0        |
| LOC100289238 | 0          | 0        |
| LOC100289239 | 0.62645306 | 0.222394 |
| LOC100289240 | 0          | 0.022406 |
| LOC100289241 | 0          | 0        |
| LOC100289242 | 0          | 0.018095 |
| LOC100289243 | 0.95782063 | 0.902326 |
| LOC100289244 | 0          | 0        |
| LOC100289245 | 0          | 0.042275 |
| LOC100289246 | 0.6927313  | 0.808223 |
| LOC100289247 | 0          | 0        |
| LOC100289249 | 0          | 0        |
| LOC100289250 | 1.35968229 | 0.923005 |
| LOC100289251 | 0.847647   | 1.235076 |
| LOC100289252 | 0.0977273  | 0.14274  |
| LOC100289253 | 0          | 0        |
| LOC100289254 | 0          | 0        |
| LOC100289255 | 0          | 0        |
| LOC100289256 | 0          | 0        |
| LOC100289257 | 0.0066917  | 0.007602 |
| LOC100289258 | 0          | 0        |
| LOC100289259 | 0          | 0        |
| LOC100289261 | 0          | 0        |
| LOC100289262 | 0          | 0        |
| LOC100289263 | 0.01289107 | 0.029289 |
| LOC100289264 | 0          | 0        |
| LOC100289266 | 0.12533729 | 0.035596 |
| LOC100289267 | 0          | 0        |
| LOC100289268 | 0          | 0.040829 |
| LOC100289269 | 0          | 0        |
| LOC100289270 | 0.02664807 | 0        |
| LOC100289271 | 0          | 0        |
| LOC100289272 | 0          | 0        |
| LOC100289273 | 0          | 0        |
| LOC100289274 | 1.5774632  | 0.776543 |
| LOC100289275 | 0          | 0        |
| LOC100289276 | 0          | 0        |
| LOC100289277 | 0.34021571 | 0.592619 |
| LOC100289278 | 0.03449603 | 0.039188 |
| LOC100289279 | 0          | 0        |
| LOC100289280 | 0          | 0        |
| LOC100289281 | 0          | 0.013189 |

|              |            |          |
|--------------|------------|----------|
| LOC100289282 | 0.03521831 | 0        |
| LOC100289283 | 0          | 0        |
| LOC100289284 | 0          | 0        |
| LOC100289285 | 0          | 0        |
| LOC100289286 | 0          | 0        |
| LOC100289287 | 0          | 0        |
| LOC100289288 | 0          | 0        |
| LOC100289289 | 0          | 0.00621  |
| LOC100289290 | 1.08915003 | 1.075906 |
| LOC100289291 | 0          | 0        |
| LOC100289292 | 0          | 0        |
| LOC100289293 | 0          | 0        |
| LOC100289294 | 1.14024856 | 0.835313 |
| LOC100289295 | 0          | 0        |
| LOC100289297 | 0.39191955 | 0.419037 |
| LOC100289298 | 0          | 0        |
| LOC100289299 | 0.15405994 | 0.070006 |
| LOC100289300 | 0          | 0        |
| LOC100289301 | 0          | 0        |
| LOC100289302 | 0          | 0        |
| LOC100289303 | 0          | 0        |
| LOC100289304 | 0          | 0        |
| LOC100289305 | 0          | 0        |
| LOC100289306 | 0          | 0        |
| LOC100289307 | 0          | 0.036466 |
| LOC100289308 | 0          | 0.014799 |
| LOC100289309 | 0.0395213  | 0.078569 |
| LOC100289310 | 0          | 0        |
| LOC100289311 | 0.11168835 | 0.09516  |
| LOC100289312 | 0.02450505 | 0.083514 |
| LOC100289313 | 0          | 0        |
| LOC100289314 | 1.60908145 | 1.218628 |
| LOC100289315 | 0          | 0        |
| LOC100289316 | 0.16739913 | 0.209185 |
| LOC100289317 | 0.01769809 | 0        |
| LOC100289318 | 0.7442595  | 0.655255 |
| LOC100289319 | 0          | 0        |
| LOC100289320 | 0          | 0        |
| LOC100289322 | 0          | 0        |
| LOC100289323 | 0          | 0        |
| LOC100289324 | 0          | 0        |
| LOC100289325 | 0          | 0        |
| LOC100289326 | 0          | 0.025948 |
| LOC100289327 | 0          | 0        |
| LOC100289329 | 0          | 0.03492  |
| LOC100289330 | 0          | 0        |
| LOC100289331 | 0.03734517 | 0        |

|              |            |          |
|--------------|------------|----------|
| LOC100289332 | 0          | 0.023348 |
| LOC100289333 | 0.13363558 | 0.354228 |
| LOC100289334 | 0          | 0.140294 |
| LOC100289335 | 0          | 0        |
| LOC100289336 | 0          | 0        |
| LOC100289337 | 0          | 0        |
| LOC100289338 | 0          | 0        |
| LOC100289339 | 0          | 0        |
| LOC100289340 | 0.01219567 | 0.027709 |
| LOC100289341 | 0.18981977 | 0.253692 |
| LOC100289342 | 6.01764497 | 6.819588 |
| LOC100289343 | 0.81313435 | 0.890743 |
| LOC100289344 | 0.01633035 | 0        |
| LOC100289345 | 0          | 0        |
| LOC100289346 | 0          | 0        |
| LOC100289347 | 0          | 0        |
| LOC100289348 | 0          | 0        |
| LOC100289349 | 0.17631305 | 0.050074 |
| LOC100289350 | 0          | 0        |
| LOC100289351 | 0          | 0        |
| LOC100289353 | 0          | 0        |
| LOC100289354 | 0          | 0        |
| LOC100289355 | 0          | 0        |
| LOC100289356 | 0          | 0        |
| LOC100289357 | 1.98610618 | 0.739116 |
| LOC100289358 | 0          | 0        |
| LOC100289359 | 0.09513724 | 0.036026 |
| LOC100289360 | 0          | 0        |
| LOC100289361 | 0.10460364 | 0.079221 |
| LOC100289362 | 0.02125918 | 0.048302 |
| LOC100289364 | 0          | 0.013389 |
| LOC100289365 | 0          | 0        |
| LOC100289366 | 0          | 0        |
| LOC100289367 | 39.0086991 | 38.92765 |
| LOC100289368 | 0          | 0        |
| LOC100289369 | 0.42582949 | 0.181406 |
| LOC100289370 | 0          | 0.077802 |
| LOC100289371 | 0          | 0        |
| LOC100289372 | 0          | 0        |
| LOC100289373 | 0          | 0        |
| LOC100289374 | 0          | 0        |
| LOC100289375 | 0          | 0        |
| LOC100289376 | 0          | 0        |
| LOC100289377 | 0.02031433 | 0.023077 |
| LOC100289378 | 0.20009466 | 0.069942 |
| LOC100289379 | 0          | 0        |
| LOC100289380 | 0          | 0        |

|              |            |          |
|--------------|------------|----------|
| LOC100289381 | 0          | 0        |
| LOC100289382 | 0          | 0        |
| LOC100289383 | 9.93716764 | 12.62882 |
| LOC100289384 | 0.035426   | 0.020122 |
| LOC100289385 | 0          | 0        |
| LOC100289386 | 0          | 0        |
| LOC100289387 | 1.29144355 | 2.290108 |
| LOC100289388 | 0.90280524 | 0.820481 |
| LOC100289389 | 0          | 0        |
| LOC100289390 | 5.79897418 | 6.955756 |
| LOC100289391 | 0          | 0.104759 |
| LOC100289392 | 0          | 0        |
| LOC100289393 | 0          | 0        |
| LOC100289394 | 0.05973105 | 0.081427 |
| LOC100289395 | 0          | 0        |
| LOC100289396 | 0.02145442 | 0        |
| LOC100289398 | 0          | 0.052668 |
| LOC100289399 | 0.27786781 | 0.294618 |
| LOC100289400 | 0          | 0        |
| LOC100289401 | 0          | 0        |
| LOC100289402 | 0          | 0        |
| LOC100289403 | 0.04782107 | 0.018108 |
| LOC100289404 | 0.10782221 | 0        |
| LOC100289405 | 0.02467762 | 0        |
| LOC100289406 | 0.09221636 | 0.419037 |
| LOC100289407 | 0          | 0        |
| LOC100289408 | 2.82301583 | 2.858405 |
| LOC100289409 | 0          | 0        |
| LOC100289410 | 0          | 0        |
| LOC100289411 | 0.03016547 | 0        |
| LOC100289412 | 0.03708171 | 0        |
| LOC100289413 | 0.05667205 | 0        |
| LOC100289414 | 0          | 0        |
| LOC100289415 | 0.01660769 | 0        |
| LOC100289416 | 0          | 0        |
| LOC100289417 | 0          | 0        |
| LOC100289418 | 0.20338893 | 0.17329  |
| LOC100289419 | 0          | 0        |
| LOC100289420 | 0.89399045 | 1.090816 |
| LOC100289421 | 0          | 0        |
| LOC100289422 | 0          | 0        |
| LOC100289423 | 0          | 0        |
| LOC100289424 | 0          | 0        |
| LOC100289425 | 0          | 0        |
| LOC100289426 | 0.05090879 | 0        |
| LOC100289427 | 0          | 0        |
| LOC100289428 | 0.04188313 | 0.01586  |

|              |            |          |
|--------------|------------|----------|
| LOC100289429 | 0.02447652 | 0        |
| LOC100289430 | 0          | 0        |
| LOC100289431 | 0.04634533 | 0.035099 |
| LOC100289432 | 0.09815747 | 0.156112 |
| LOC100289433 | 0          | 0        |
| LOC100289434 | 0          | 0.012193 |
| LOC100289436 | 0.01928929 | 0        |
| LOC100289437 | 0          | 0        |
| LOC100289438 | 0          | 0        |
| LOC100289439 | 0.04260452 | 0        |
| LOC100289440 | 0          | 0        |
| LOC100289441 | 0.08321371 | 0.047266 |
| LOC100289442 | 0          | 0        |
| LOC100289443 | 0.30919604 | 0.050179 |
| LOC100289444 | 0.04751487 | 0.07197  |
| LOC100289445 | 0          | 0        |
| LOC100289446 | 0.05103236 | 0        |
| LOC100289447 | 0.01318203 | 0        |
| LOC100289448 | 0          | 0        |
| LOC100289449 | 0          | 0.037379 |
| LOC100289450 | 0          | 0        |
| LOC100289451 | 0          | 0        |
| LOC100289452 | 0          | 0        |
| LOC100289453 | 0          | 0        |
| LOC100289454 | 0.24228935 | 0.183496 |
| LOC100289455 | 0.43986048 | 0.416407 |
| LOC100289456 | 0          | 0        |
| LOC100289457 | 0          | 0        |
| LOC100289458 | 0.03249665 | 0        |
| LOC100289459 | 0          | 0.037674 |
| LOC100289461 | 0.15968606 | 0.201562 |
| LOC100289462 | 0          | 0        |
| LOC100289463 | 0          | 0        |
| LOC100289464 | 0          | 0.026989 |
| LOC100289465 | 0          | 0        |
| LOC100289466 | 0.07024053 | 0        |
| LOC100289467 | 0          | 0        |
| LOC100289468 | 0          | 0        |
| LOC100289469 | 0.05170163 | 0        |
| LOC100289470 | 0          | 0        |
| LOC100289471 | 0          | 0        |
| LOC100289472 | 0          | 0        |
| LOC100289473 | 2.06440085 | 1.538566 |
| LOC100289474 | 0.01928929 | 0.065739 |
| LOC100289475 | 0          | 0        |
| LOC100289476 | 0          | 0        |
| LOC100289477 | 0          | 0        |

|              |            |          |
|--------------|------------|----------|
| LOC100289478 | 0.94846995 | 1.065021 |
| LOC100289479 | 0          | 0        |
| LOC100289480 | 0.06643075 | 0        |
| LOC100289481 | 0          | 0        |
| LOC100289482 | 0          | 0        |
| LOC100289483 | 0.06674708 | 0.113739 |
| LOC100289484 | 0          | 0        |
| LOC100289485 | 0          | 0        |
| LOC100289486 | 0          | 0        |
| LOC100289487 | 0          | 0        |
| LOC100289488 | 0.18139501 | 0.318468 |
| LOC100289489 | 0          | 0        |
| LOC100289490 | 0.29556376 | 0.213669 |
| LOC100289491 | 0          | 0        |
| LOC100289492 | 1.29701717 | 1.124461 |
| LOC100289494 | 0          | 0.015022 |
| LOC100289495 | 0.10618854 | 0.080421 |
| LOC100289496 | 0          | 0        |
| LOC100289497 | 0.13947152 | 0.198052 |
| LOC100289498 | 0.01168723 | 0        |
| LOC100289499 | 0          | 0        |
| LOC100289500 | 0          | 0        |
| LOC100289501 | 0          | 0        |
| LOC100289502 | 0          | 0        |
| LOC100289503 | 0.34467756 | 0.621888 |
| LOC100289504 | 0          | 0        |
| LOC100289505 | 0          | 0        |
| LOC100289506 | 8.13943588 | 8.425083 |
| LOC100289507 | 0          | 0.068049 |
| LOC100289508 | 0          | 0        |
| LOC100289509 | 0.01892469 | 0        |
| LOC100289510 | 0.12552436 | 0        |
| LOC100289511 | 0.0496173  | 0.126824 |
| LOC100289512 | 0          | 0        |
| LOC100289513 | 0          | 0        |
| LOC100289514 | 0          | 0        |
| LOC100289515 | 0          | 0        |
| LOC100289516 | 0          | 0        |
| LOC100289517 | 0.06882269 | 0.078184 |
| LOC100289518 | 1.5418576  | 1.273873 |
| LOC100289519 | 0.17210366 | 0.097756 |
| LOC100289520 | 0          | 0        |
| LOC100289521 | 0          | 0        |
| LOC100289522 | 0          | 0.023766 |
| LOC100289523 | 0          | 0        |
| LOC100289525 | 0.01992922 | 0.02264  |
| LOC100289526 | 0.29752827 | 0        |

|              |            |          |
|--------------|------------|----------|
| LOC100289527 | 0          | 0        |
| LOC100289528 | 0          | 0        |
| LOC100289529 | 0          | 0        |
| LOC100289530 | 0          | 0        |
| LOC100289531 | 0.13247283 | 0.042997 |
| LOC100289532 | 0.03836739 | 0        |
| LOC100289533 | 0          | 0        |
| LOC100289534 | 0.14302946 | 0.046424 |
| LOC100289535 | 0          | 0        |
| LOC100289536 | 0          | 0        |
| LOC100289537 | 0.02982316 | 0.03388  |
| LOC100289538 | 0.72281219 | 0.893578 |
| LOC100289539 | 0.02183316 | 0        |
| LOC100289540 | 0.08890203 | 0.100994 |
| LOC100289541 | 0          | 0        |
| LOC100289542 | 0          | 0        |
| LOC100289543 | 0          | 0        |
| LOC100289544 | 0.018188   | 0.041324 |
| LOC100289545 | 0          | 0        |
| LOC100289546 | 0.04492592 | 0.025518 |
| LOC100289547 | 0.01189889 | 0.027035 |
| LOC100289548 | 0          | 0        |
| LOC100289550 | 0.3355106  | 0.211747 |
| LOC100289551 | 0          | 0        |
| LOC100289552 | 0          | 0        |
| LOC100289553 | 0.94708698 | 1.075906 |
| LOC100289554 | 0          | 0        |
| LOC100289555 | 0          | 0.009013 |
| LOC100289556 | 7.53350621 | 9.429561 |
| LOC100289558 | 0          | 0.065349 |
| LOC100289559 | 0          | 0        |
| LOC100289560 | 0          | 0        |
| LOC100289561 | 6.57041593 | 5.553288 |
| LOC100289562 | 0          | 0        |
| LOC100289563 | 0          | 0.009777 |
| LOC100289564 | 0          | 0        |
| LOC100289565 | 0.03463811 | 0        |
| LOC100289566 | 0          | 0        |
| LOC100289567 | 0.28514011 | 0.085243 |
| LOC100289568 | 0          | 0        |
| LOC100289569 | 0          | 0        |
| LOC100289570 | 0          | 0        |
| LOC100289571 | 0          | 0        |
| LOC100289572 | 0.07852598 | 0.200715 |
| LOC100289573 | 0.01757971 | 0        |
| LOC100289574 | 0.06449488 | 0.122112 |
| LOC100289575 | 0.07665485 | 0.124402 |

|              |            |          |
|--------------|------------|----------|
| LOC100289576 | 0          | 0        |
| LOC100289577 | 0.03396661 | 0        |
| LOC100289578 | 0          | 0        |
| LOC100289579 | 0          | 0        |
| LOC100289580 | 8.09308374 | 13.8382  |
| LOC100289581 | 0          | 0        |
| LOC100289582 | 0.11042716 | 0.125447 |
| LOC100289583 | 0          | 0        |
| LOC100289584 | 0          | 0        |
| LOC100289585 | 0          | 0        |
| LOC100289586 | 0          | 0        |
| LOC100289587 | 0          | 0        |
| LOC100289588 | 0          | 0        |
| LOC100289589 | 0.07215282 | 0.016393 |
| LOC100289591 | 0.16901391 | 0.115201 |
| LOC100289592 | 0.02737673 | 0        |
| LOC100289593 | 0          | 0        |
| LOC100289594 | 0          | 0        |
| LOC100289595 | 0          | 0        |
| LOC100289596 | 0          | 0        |
| LOC100289597 | 0          | 0        |
| LOC100289598 | 0.01544844 | 0.01755  |
| LOC100289599 | 0          | 0        |
| LOC100289600 | 0.10157165 | 0.115387 |
| LOC100289601 | 1.71505721 | 2.273054 |
| LOC100289602 | 0.59292563 | 0.662881 |
| LOC100289603 | 0          | 0.018763 |
| LOC100289604 | 0          | 0        |
| LOC100289605 | 0          | 0        |
| LOC100289606 | 0          | 0        |
| LOC100289607 | 0          | 0        |
| LOC100289608 | 0          | 0        |
| LOC100289609 | 0          | 0        |
| LOC100289610 | 13.7088239 | 9.186581 |
| LOC100289611 | 0          | 0.109565 |
| LOC100289612 | 0.19726659 | 0.298797 |
| LOC100289613 | 0          | 0        |
| LOC100289614 | 0          | 0        |
| LOC100289615 | 0.05246496 | 0.044701 |
| LOC100289616 | 0          | 0        |
| LOC100289617 | 0.26681892 | 0.38394  |
| LOC100289618 | 0.16095377 | 0.176074 |
| LOC100289619 | 0          | 0        |
| LOC100289620 | 0          | 0        |
| LOC100289621 | 103.891733 | 132.699  |
| LOC100289622 | 0          | 0        |
| LOC100289623 | 0          | 0        |



|              |            |          |
|--------------|------------|----------|
| LOC100289624 | 0.02021666 | 0.045933 |
| LOC100289625 | 0.31071918 | 0.308859 |
| LOC100289626 | 0          | 0.015881 |
| LOC100289627 | 0.3459378  | 0.436656 |
| LOC100289629 | 0.04051123 | 0.092043 |
| LOC100289630 | 0          | 0        |
| LOC100289631 | 0          | 0        |
| LOC100289632 | 0.07246544 | 0.117603 |
| LOC100289633 | 0          | 0        |
| LOC100289634 | 0.06558119 | 0.044701 |
| LOC100289635 | 0.13697284 | 0.116702 |
| LOC100289636 | 0          | 0        |
| LOC100289637 | 0          | 0        |
| LOC100289638 | 0          | 0        |
| LOC100289639 | 0.00982492 | 0        |
| LOC100289640 | 0          | 0        |
| LOC100289641 | 0.02115224 | 0.144176 |
| LOC100289642 | 0          | 0        |
| LOC100289643 | 0          | 0        |
| LOC100289644 | 0          | 0        |
| LOC100289645 | 0          | 0        |
| LOC100289646 | 0.05786788 | 0.065739 |
| LOC100289647 | 0          | 0.0329   |
| LOC100289648 | 0          | 0        |
| LOC100289649 | 0          | 0        |
| LOC100289650 | 0          | 0        |
| LOC100289651 | 0          | 0        |
| LOC100289652 | 0.02719965 | 0.030899 |
| LOC100289653 | 0.03418753 | 0.077675 |
| LOC100289654 | 0          | 0.091339 |
| LOC100289655 | 0          | 0        |
| LOC100289656 | 0.01160338 | 0        |
| LOC100289657 | 0          | 0        |
| LOC100289658 | 0.02057273 | 0        |
| LOC100289659 | 0          | 0.016552 |
| LOC100289660 | 0          | 0.035022 |
| LOC100289661 | 0.0381239  | 0.129928 |
| LOC100289662 | 0          | 0        |
| LOC100289663 | 0          | 0        |
| LOC100289664 | 0.02343961 | 0        |
| LOC100289665 | 0          | 0        |
| LOC100289666 | 0          | 0        |
| LOC100289667 | 0          | 0        |
| LOC100289668 | 0          | 0        |
| LOC100289669 | 0.02330968 | 0.008827 |
| LOC100289670 | 0          | 0        |
| LOC100289671 | 0.09101875 | 0.059085 |

|              |            |          |
|--------------|------------|----------|
| LOC100289672 | 0          | 0        |
| LOC100289673 | 0          | 0        |
| LOC100289674 | 0          | 0        |
| LOC100289675 | 0          | 0        |
| LOC100289676 | 0          | 0        |
| LOC100289677 | 0.15768998 | 0.208995 |
| LOC100289678 | 1.34977433 | 1.254571 |
| LOC100289679 | 0          | 0        |
| LOC100289680 | 0          | 0        |
| LOC100289681 | 0.22898875 | 0.449324 |
| LOC100289682 | 0          | 0        |
| LOC100289683 | 0          | 0        |
| LOC100418999 | 0          | 0        |
| LOC100419554 | 0          | 0        |
| LOC100419723 | 0          | 0        |
| LOC100419952 | 0          | 0        |
| LOC100422566 | 0          | 0        |
| LOC100422624 | 0          | 0        |
| LOC100462832 | 0          | 0        |
| LOC100505489 | 0          | 0        |
| LOC100505513 | 0          | 0        |
| LOC100505542 | 0          | 0        |
| LOC100505575 | 0          | 0        |
| LOC100506003 | 0          | 0        |
| LOC100506481 | 0          | 0        |
| LOC100506511 | 0.12173475 | 0.217317 |
| LOC100506623 | 0          | 0        |
| LOC100507667 | 0          | 0        |
| LOC100507676 | 2.92705588 | 3.55935  |
| LOC113230    | 0          | 0        |
| LOC115110    | 0          | 0        |
| LOC116437    | 0          | 0        |
| LOC119358    | 0.11878718 | 0        |
| LOC120321    | 0          | 0        |
| LOC120364    | 0          | 0.049452 |
| LOC120376    | 0          | 0        |
| LOC120449    | 0          | 0        |
| LOC120824    | 0          | 0        |
| LOC121014    | 0          | 0        |
| LOC121296    | 0          | 0        |
| LOC121456    | 0          | 0        |
| LOC121498    | 0          | 0        |
| LOC121520    | 0          | 0        |
| LOC121727    | 0          | 0        |
| LOC121838    | 0          | 0        |
| LOC121906    | 0          | 0        |
| LOC121952    | 0          | 0        |

|           |            |          |
|-----------|------------|----------|
| LOC121981 | 0          | 0        |
| LOC122038 | 0          | 0        |
| LOC122145 | 0          | 0        |
| LOC122335 | 0          | 0        |
| LOC122631 | 0          | 0        |
| LOC122867 | 0          | 0        |
| LOC123688 | 0.01606213 | 0.018247 |
| LOC123855 | 0          | 0.029316 |
| LOC123862 | 0          | 0        |
| LOC124199 | 0          | 0        |
| LOC124496 | 0          | 0        |
| LOC124685 | 0          | 0        |
| LOC124865 | 0          | 0        |
| LOC124974 | 0          | 0        |
| LOC126075 | 13.7663503 | 14.42544 |
| LOC126170 | 0.13391931 | 0.152134 |
| LOC126506 | 0          | 0        |
| LOC126536 | 0          | 0        |
| LOC126661 | 2.64747085 | 2.005046 |
| LOC126860 | 0          | 0        |
| LOC126987 | 0.07645575 | 0.028952 |
| LOC127011 | 0          | 0        |
| LOC127086 | 0          | 0        |
| LOC127671 | 0          | 0        |
| LOC127841 | 0          | 0        |
| LOC128102 | 0          | 0        |
| LOC128136 | 0          | 0        |
| LOC128192 | 0          | 0        |
| LOC128322 | 0          | 0        |
| LOC128820 | 0          | 0        |
| LOC129026 | 0          | 0        |
| LOC129293 | 0.07390275 | 0.041977 |
| LOC129402 | 0          | 0        |
| LOC129522 | 0          | 0        |
| LOC129560 | 0          | 0        |
| LOC129656 | 0          | 0        |
| LOC130195 | 0          | 0        |
| LOC131054 | 0          | 0        |
| LOC131055 | 0          | 0        |
| LOC131185 | 0          | 0        |
| LOC131572 | 0          | 0        |
| LOC131973 | 0          | 0        |
| LOC132386 | 0          | 0        |
| LOC132719 | 0          | 0        |
| LOC132817 | 0          | 0        |
| LOC133083 | 0          | 0        |
| LOC133332 | 0          | 0        |

|           |            |          |
|-----------|------------|----------|
| LOC133789 | 0          | 0        |
| LOC133874 | 1.40168873 | 0.983505 |
| LOC134466 | 0          | 0        |
| LOC134505 | 0          | 0.04327  |
| LOC134997 | 0          | 0        |
| LOC136157 | 0          | 0        |
| LOC136242 | 0          | 0.020088 |
| LOC137012 | 0          | 0        |
| LOC138159 | 0          | 0        |
| LOC138234 | 0          | 0        |
| LOC138412 | 0          | 0        |
| LOC138652 | 0          | 0        |
| LOC138864 | 0          | 0        |
| LOC138971 | 0          | 0        |
| LOC139060 | 0          | 0        |
| LOC139061 | 0          | 0        |
| LOC139201 | 0          | 0        |
| LOC139431 | 0          | 0        |
| LOC139466 | 0          | 0        |
| LOC139516 | 0          | 0        |
| LOC139542 | 0          | 0        |
| LOC139952 | 0          | 0        |
| LOC139957 | 0          | 0        |
| LOC143188 | 0          | 0        |
| LOC143506 | 0          | 0        |
| LOC143666 | 0          | 0        |
| LOC143678 | 0.05697922 | 0.194188 |
| LOC144383 | 0          | 0        |
| LOC144438 | 0          | 0        |
| LOC144486 | 0          | 0        |
| LOC144571 | 0          | 0        |
| LOC144742 | 0          | 0        |
| LOC144776 | 0          | 0        |
| LOC145474 | 0          | 0        |
| LOC145757 | 0          | 0        |
| LOC145783 | 0          | 0        |
| LOC145814 | 0.02113099 | 0.024005 |
| LOC145820 | 0          | 0        |
| LOC145837 | 0          | 0        |
| LOC145845 | 0          | 0        |
| LOC145989 | 0          | 0        |
| LOC146253 | 0          | 0        |
| LOC146336 | 0          | 0        |
| LOC146429 | 0          | 0        |
| LOC146481 | 0          | 0        |
| LOC146880 | 0          | 0        |
| LOC147150 | 0          | 0        |

|           |            |          |
|-----------|------------|----------|
| LOC147226 | 0          | 0        |
| LOC147228 | 0          | 0        |
| LOC147645 | 0.29758226 | 0.474582 |
| LOC147646 | 0.01595245 | 0.054367 |
| LOC147670 | 0.08125732 | 0.023077 |
| LOC147710 | 0          | 0.074992 |
| LOC147727 | 0          | 0        |
| LOC147804 | 0          | 0        |
| LOC148003 | 0.03082893 | 0.070044 |
| LOC148145 | 0          | 0        |
| LOC148189 | 0          | 0        |
| LOC148413 | 0          | 0        |
| LOC148430 | 0          | 0        |
| LOC148696 | 0          | 0        |
| LOC148709 | 0          | 0        |
| LOC148824 | 0          | 0        |
| LOC149086 | 0          | 0        |
| LOC149134 | 0          | 0        |
| LOC149478 | 0.73561909 | 1.549797 |
| LOC149501 | 0          | 0        |
| LOC149620 | 0          | 0        |
| LOC149837 | 0          | 0        |
| LOC149844 | 0          | 0        |
| LOC149935 | 0          | 0        |
| LOC149950 | 0          | 0        |
| LOC150051 | 0          | 0        |
| LOC150185 | 0          | 0        |
| LOC150197 | 0          | 0        |
| LOC150381 | 0          | 0        |
| LOC150417 | 0          | 0        |
| LOC150519 | 0          | 0        |
| LOC150527 | 0          | 0        |
| LOC150554 | 0          | 0        |
| LOC150568 | 0          | 0        |
| LOC150577 | 0          | 0        |
| LOC150622 | 0          | 0        |
| LOC150763 | 0.20102122 | 0.118411 |
| LOC150776 | 0          | 0        |
| LOC150786 | 0.01720098 | 0.052108 |
| LOC151009 | 0          | 0        |
| LOC151121 | 0          | 0        |
| LOC151162 | 0          | 0        |
| LOC151174 | 0          | 0        |
| LOC151276 | 0          | 0        |
| LOC151300 | 0          | 0        |
| LOC151457 | 0          | 0        |
| LOC151534 | 0          | 0        |

|           |            |          |
|-----------|------------|----------|
| LOC151658 | 0          | 0        |
| LOC151760 | 0          | 0        |
| LOC152024 | 0          | 0        |
| LOC152118 | 0          | 0        |
| LOC152217 | 0          | 0        |
| LOC152225 | 0          | 0        |
| LOC152594 | 0          | 0        |
| LOC152667 | 0          | 0        |
| LOC152845 | 0          | 0        |
| LOC152905 | 0          | 0        |
| LOC153328 | 0.01753572 | 0.039842 |
| LOC153684 | 0          | 0        |
| LOC153893 | 0          | 0        |
| LOC153910 | 0          | 0        |
| LOC153932 | 0          | 0        |
| LOC154449 | 0          | 0        |
| LOC154761 | 0          | 0        |
| LOC154822 | 0          | 0        |
| LOC154860 | 0          | 0        |
| LOC154872 | 0          | 0        |
| LOC154937 | 0          | 0        |
| LOC157381 | 0          | 0        |
| LOC157627 | 0          | 0        |
| LOC157667 | 0          | 0        |
| LOC157713 | 0          | 0        |
| LOC158376 | 0          | 0        |
| LOC158381 | 0          | 0        |
| LOC158383 | 0          | 0        |
| LOC158452 | 0          | 0        |
| LOC158572 | 0          | 0        |
| LOC158696 | 0          | 0        |
| LOC158714 | 0          | 0        |
| LOC158781 | 0          | 0        |
| LOC158948 | 0          | 0        |
| LOC159007 | 0          | 0        |
| LOC162632 | 0          | 0        |
| LOC168474 | 0          | 0        |
| LOC169834 | 0.00883789 | 0        |
| LOC1720   | 0          | 0        |
| LOC192127 | 0          | 0        |
| LOC192128 | 0          | 0        |
| LOC192130 | 0          | 0        |
| LOC192132 | 0          | 0        |
| LOC196120 | 0          | 0        |
| LOC196415 | 0          | 0        |
| LOC196469 | 0          | 0        |
| LOC196913 | 0.2587733  | 0.587941 |

|           |            |          |
|-----------|------------|----------|
| LOC196993 | 0.01148298 | 0        |
| LOC197331 | 0          | 0        |
| LOC199800 | 0.10950693 | 0.101783 |
| LOC199882 | 0          | 0        |
| LOC200025 | 0          | 0        |
| LOC200030 | 18.159414  | 14.48945 |
| LOC200149 | 0          | 0        |
| LOC200261 | 0          | 0        |
| LOC200726 | 0          | 0        |
| LOC201229 | 0.32652438 | 0.274171 |
| LOC201651 | 0          | 0        |
| LOC202051 | 0.55819463 | 0.317059 |
| LOC202181 | 0          | 0        |
| LOC202227 | 0          | 0        |
| LOC202319 | 0          | 0        |
| LOC202451 | 0          | 0        |
| LOC202781 | 2.26781449 | 2.106868 |
| LOC203510 | 0.03469527 | 0        |
| LOC203930 | 0          | 0        |
| LOC204800 | 0          | 0        |
| LOC205272 | 0          | 0        |
| LOC219752 | 0          | 0        |
| LOC220077 | 0          | 0        |
| LOC220115 | 0          | 0        |
| LOC220147 | 0          | 0        |
| LOC220429 | 0          | 0        |
| LOC220594 | 0          | 0        |
| LOC220729 | 0          | 0        |
| LOC220930 | 0          | 0        |
| LOC221122 | 0          | 0        |
| LOC221442 | 0          | 0        |
| LOC221710 | 1.37092505 | 1.704989 |
| LOC222052 | 0          | 0        |
| LOC222699 | 0          | 0        |
| LOC222701 | 0          | 0        |
| LOC246135 | 0          | 0        |
| LOC246717 | 0          | 0        |
| LOC246720 | 0          | 0        |
| LOC246723 | 0          | 0        |
| LOC246784 | 0          | 0        |
| LOC246785 | 0          | 0        |
| LOC252840 | 0          | 0        |
| LOC252841 | 0          | 0        |
| LOC252968 | 0          | 0        |
| LOC253039 | 0          | 0        |
| LOC253665 | 0          | 0        |
| LOC253724 | 0          | 0        |

|           |            |          |
|-----------|------------|----------|
| LOC254312 | 0          | 0        |
| LOC254398 | 0          | 0        |
| LOC254559 | 0          | 0        |
| LOC255025 | 0          | 0        |
| LOC255167 | 0          | 0        |
| LOC255208 | 0          | 0        |
| LOC255308 | 0          | 0        |
| LOC255411 | 0          | 0        |
| LOC255512 | 0.27042226 | 0.256003 |
| LOC255783 | 16.5646529 | 16.34094 |
| LOC256085 | 0          | 0        |
| LOC256374 | 1.50180935 | 0.900431 |
| LOC256483 | 0          | 0        |
| LOC256880 | 0          | 0        |
| LOC257358 | 0          | 0        |
| LOC257396 | 0.02158658 | 0.024523 |
| LOC25845  | 0          | 0        |
| LOC26010  | 0.43631147 | 0.506055 |
| LOC260334 | 0          | 0        |
| LOC260337 | 0          | 0        |
| LOC260338 | 0          | 0        |
| LOC260339 | 0          | 0        |
| LOC260421 | 0          | 0        |
| LOC260422 | 0          | 0        |
| LOC26102  | 0          | 0        |
| LOC266619 | 0          | 0        |
| LOC266683 | 0          | 0        |
| LOC266693 | 0          | 0        |
| LOC266694 | 0          | 0        |
| LOC268276 | 0          | 0        |
| LOC282997 | 0          | 0        |
| LOC283014 | 0          | 0        |
| LOC283028 | 0          | 0        |
| LOC283050 | 0          | 0        |
| LOC283070 | 0          | 0        |
| LOC283104 | 0.04754173 | 0.081012 |
| LOC283116 | 0          | 0        |
| LOC283143 | 0          | 0        |
| LOC283155 | 0          | 0        |
| LOC283172 | 0          | 0        |
| LOC283174 | 0          | 0        |
| LOC283236 | 0          | 0        |
| LOC283267 | 0          | 0        |
| LOC283314 | 0          | 0        |
| LOC283332 | 0          | 0        |
| LOC283392 | 0          | 0        |
| LOC283398 | 0.76081107 | 0.621211 |



|           |            |          |
|-----------|------------|----------|
| LOC283440 | 0          | 0.04183  |
| LOC283481 | 0          | 0        |
| LOC283486 | 0.00616037 | 0.006998 |
| LOC283523 | 0          | 0        |
| LOC283547 | 0          | 0        |
| LOC283588 | 0          | 0        |
| LOC283663 | 0          | 0        |
| LOC283683 | 0          | 0        |
| LOC283685 | 0.00845409 | 0        |
| LOC283693 | 0          | 0        |
| LOC283698 | 0          | 0        |
| LOC283710 | 1.34074574 | 1.06156  |
| LOC283711 | 0          | 0        |
| LOC283731 | 0          | 0        |
| LOC283761 | 0          | 0        |
| LOC283767 | 0.11002266 | 0.106239 |
| LOC283804 | 0          | 0        |
| LOC283856 | 0          | 0        |
| LOC283867 | 0          | 0        |
| LOC283914 | 0          | 0        |
| LOC283922 | 0          | 0        |
| LOC283999 | 0.00925411 | 0.031538 |
| LOC284009 | 0.25551617 | 0.373205 |
| LOC284023 | 0          | 0        |
| LOC284043 | 0          | 0        |
| LOC284067 | 0          | 0        |
| LOC284072 | 0.0078482  | 0.017831 |
| LOC284100 | 0          | 0        |
| LOC284196 | 0          | 0        |
| LOC284215 | 0          | 0        |
| LOC284233 | 0          | 0        |
| LOC284242 | 0          | 0        |
| LOC284269 | 0          | 0        |
| LOC284276 | 0          | 0        |
| LOC284288 | 0          | 0        |
| LOC284297 | 0.04710359 | 0.004865 |
| LOC284379 | 0          | 0        |
| LOC284395 | 0          | 0        |
| LOC284422 | 0.0926226  | 0.05261  |
| LOC284440 | 0          | 0        |
| LOC284441 | 0          | 0        |
| LOC284551 | 0          | 0        |
| LOC284577 | 0          | 0        |
| LOC284578 | 0          | 0        |
| LOC284620 | 0          | 0        |
| LOC284632 | 0          | 0        |
| LOC284648 | 0          | 0.012571 |

|           |            |          |
|-----------|------------|----------|
| LOC284661 | 0          | 0        |
| LOC284672 | 0          | 0        |
| LOC284685 | 0          | 0        |
| LOC284688 | 0          | 0        |
| LOC284749 | 0          | 0        |
| LOC284788 | 0          | 0        |
| LOC284798 | 0          | 0        |
| LOC284801 | 0.13161397 | 0.112137 |
| LOC284805 | 0          | 0        |
| LOC284837 | 0          | 0        |
| LOC284861 | 0          | 0        |
| LOC284889 | 0.18950276 | 0.064583 |
| LOC284890 | 0          | 0        |
| LOC284900 | 0          | 0        |
| LOC284912 | 0          | 0        |
| LOC284988 | 0.04626035 | 0.131381 |
| LOC285033 | 2.34919899 | 3.246952 |
| LOC285045 | 0          | 0        |
| LOC285074 | 0          | 0        |
| LOC285095 | 0          | 0        |
| LOC285141 | 0          | 0        |
| LOC285194 | 0          | 0        |
| LOC285205 | 0          | 0        |
| LOC285216 | 0          | 0        |
| LOC285232 | 0          | 0        |
| LOC285303 | 0          | 0        |
| LOC285359 | 0          | 0        |
| LOC285370 | 0          | 0        |
| LOC285375 | 0          | 0        |
| LOC285401 | 0          | 0        |
| LOC285407 | 0          | 0        |
| LOC285412 | 0          | 0        |
| LOC285419 | 0          | 0        |
| LOC285423 | 0          | 0        |
| LOC285442 | 0          | 0        |
| LOC285453 | 0          | 0        |
| LOC285456 | 0          | 0        |
| LOC285484 | 0          | 0        |
| LOC285501 | 0          | 0.029561 |
| LOC285548 | 0          | 0        |
| LOC285550 | 2.23439093 | 1.879216 |
| LOC285556 | 0.00206434 | 0        |
| LOC285591 | 0          | 0        |
| LOC285593 | 0          | 0        |
| LOC285627 | 0          | 0        |
| LOC285629 | 0          | 0        |
| LOC285634 | 0          | 0        |

|           |            |          |
|-----------|------------|----------|
| LOC285647 | 0          | 0        |
| LOC285679 | 0          | 0        |
| LOC285692 | 0          | 0        |
| LOC285696 | 0          | 0        |
| LOC285697 | 0          | 0        |
| LOC285706 | 0          | 0        |
| LOC285733 | 0          | 0        |
| LOC285735 | 0          | 0        |
| LOC285740 | 0          | 0        |
| LOC285741 | 0          | 0        |
| LOC285768 | 0          | 0        |
| LOC285780 | 0          | 0        |
| LOC285830 | 0          | 0        |
| LOC285847 | 0          | 0        |
| LOC285872 | 0          | 0        |
| LOC285941 | 0.01056019 | 0.011997 |
| LOC285943 | 0          | 0        |
| LOC285954 | 0          | 0        |
| LOC286002 | 0.00519657 | 0        |
| LOC286016 | 0          | 0        |
| LOC286094 | 0          | 0        |
| LOC286135 | 0          | 0        |
| LOC286177 | 0          | 0        |
| LOC286238 | 0          | 0        |
| LOC286239 | 0          | 0        |
| LOC286359 | 0          | 0        |
| LOC286367 | 0          | 0        |
| LOC286456 | 0          | 0        |
| LOC286467 | 0          | 0        |
| LOC286512 | 0          | 0        |
| LOC286528 | 0          | 0        |
| LOC29034  | 0          | 0        |
| LOC317727 | 0          | 0        |
| LOC338588 | 0          | 0        |
| LOC338591 | 0          | 0        |
| LOC338598 | 0          | 0.016259 |
| LOC338651 | 0          | 0        |
| LOC338667 | 0.00337215 | 0        |
| LOC338756 | 0.54556747 | 0.381399 |
| LOC338758 | 0.84077472 | 0.724818 |
| LOC338797 | 0          | 0        |
| LOC338799 | 0          | 0        |
| LOC338805 | 0          | 0        |
| LOC338963 | 0          | 0        |
| LOC339047 | 9.56808856 | 8.013169 |
| LOC339186 | 0          | 0        |
| LOC339192 | 31.7740321 | 41.60299 |

|           |            |          |
|-----------|------------|----------|
| LOC339240 | 0          | 0        |
| LOC339244 | 0          | 0        |
| LOC339257 | 0          | 0        |
| LOC339258 | 0          | 0        |
| LOC339290 | 0          | 0        |
| LOC339352 | 0          | 0        |
| LOC339396 | 0          | 0        |
| LOC339483 | 0          | 0        |
| LOC339524 | 0          | 0        |
| LOC339535 | 0          | 0        |
| LOC339568 | 0          | 0        |
| LOC339674 | 0          | 0        |
| LOC339742 | 0.02795922 | 0        |
| LOC339760 | 0          | 0        |
| LOC339788 | 0          | 0        |
| LOC339799 | 0          | 0        |
| LOC339803 | 0.28388633 | 0.42328  |
| LOC339809 | 0          | 0        |
| LOC339843 | 0          | 0        |
| LOC339879 | 0          | 0        |
| LOC339881 | 0          | 0        |
| LOC339897 | 0          | 0        |
| LOC339902 | 0          | 0        |
| LOC339929 | 0.03686068 | 0.041874 |
| LOC339966 | 0          | 0        |
| LOC340017 | 0          | 0        |
| LOC340074 | 0          | 0        |
| LOC340089 | 0          | 0        |
| LOC340094 | 0          | 0        |
| LOC340096 | 0          | 0        |
| LOC340192 | 0          | 0        |
| LOC340239 | 0          | 0        |
| LOC340268 | 0          | 0        |
| LOC340357 | 0          | 0        |
| LOC340501 | 0          | 0        |
| LOC340502 | 0          | 0        |
| LOC340508 | 0          | 0        |
| LOC340515 | 0          | 0        |
| LOC340569 | 0          | 0        |
| LOC340844 | 0          | 0        |
| LOC340888 | 0          | 0        |
| LOC340900 | 0          | 0        |
| LOC340947 | 0.13265193 | 0.075347 |
| LOC340970 | 0          | 0        |
| LOC341056 | 0          | 0        |
| LOC341333 | 0          | 0        |
| LOC341378 | 0.01985395 | 0        |

|           |            |          |
|-----------|------------|----------|
| LOC341689 | 0          | 0        |
| LOC341784 | 0          | 0        |
| LOC341965 | 0          | 0        |
| LOC342293 | 0          | 0        |
| LOC342346 | 0.08591787 | 0.069717 |
| LOC342443 | 0          | 0        |
| LOC342541 | 0.12441024 | 0.141332 |
| LOC342705 | 0          | 0        |
| LOC342784 | 0          | 0        |
| LOC342918 | 0          | 0.017905 |
| LOC343052 | 0.25966913 | 0.286049 |
| LOC343165 | 0          | 0        |
| LOC343338 | 0          | 0        |
| LOC343384 | 0          | 0        |
| LOC343508 | 0          | 0        |
| LOC343515 | 0          | 0        |
| LOC343981 | 0          | 0        |
| LOC344065 | 0.27305625 | 0.221569 |
| LOC344328 | 0          | 0        |
| LOC344382 | 0.080326   | 0.022813 |
| LOC344593 | 0          | 0        |
| LOC344595 | 0.00635206 | 0.007216 |
| LOC344653 | 0          | 0        |
| LOC344709 | 0          | 0        |
| LOC344741 | 0          | 0        |
| LOC344875 | 0          | 0        |
| LOC344887 | 0          | 0        |
| LOC344967 | 0          | 0        |
| LOC344978 | 0          | 0        |
| LOC345016 | 0          | 0        |
| LOC345051 | 0          | 0        |
| LOC345258 | 0          | 0        |
| LOC345471 | 0          | 0        |
| LOC345571 | 0          | 0        |
| LOC345576 | 0          | 0        |
| LOC345643 | 0          | 0        |
| LOC345645 | 0          | 0.095694 |
| LOC346296 | 0          | 0        |
| LOC346329 | 0          | 0        |
| LOC346702 | 0.06992904 | 0        |
| LOC347028 | 0          | 0        |
| LOC347097 | 0          | 0        |
| LOC347119 | 0          | 0        |
| LOC347193 | 0          | 0        |
| LOC347275 | 0          | 0        |
| LOC347281 | 0          | 0        |
| LOC347363 | 0          | 0        |

|           |            |          |
|-----------|------------|----------|
| LOC347376 | 0          | 0        |
| LOC347381 | 0          | 0        |
| LOC347411 | 0.03682195 | 0        |
| LOC347422 | 0          | 0        |
| LOC347475 | 0          | 0        |
| LOC347509 | 0          | 0        |
| LOC347549 | 0          | 0        |
| LOC347674 | 0          | 0        |
| LOC347675 | 0          | 0        |
| LOC347701 | 0          | 0        |
| LOC347716 | 0          | 0        |
| LOC347717 | 0          | 0        |
| LOC348021 | 0          | 0        |
| LOC348262 | 17.1838349 | 15.64416 |
| LOC348751 | 0.13889566 | 0.197235 |
| LOC348840 | 0          | 0        |
| LOC348926 | 0          | 0        |
| LOC348958 | 0          | 0        |
| LOC349114 | 0          | 0        |
| LOC349196 | 0          | 0        |
| LOC353194 | 0          | 0        |
| LOC353196 | 0          | 0        |
| LOC359819 | 0          | 0        |
| LOC360030 | 0          | 0.026334 |
| LOC374443 | 0          | 0        |
| LOC374491 | 0          | 0        |
| LOC375010 | 0          | 0        |
| LOC375190 | 0.80568696 | 0.598448 |
| LOC375295 | 0          | 0        |
| LOC375337 | 0.00394176 | 0.004478 |
| LOC375350 | 0          | 0        |
| LOC376818 | 0          | 0        |
| LOC377711 | 0.05996335 | 0.018578 |
| LOC386610 | 0          | 0        |
| LOC387361 | 0          | 0        |
| LOC387646 | 0          | 0        |
| LOC387647 | 0          | 0        |
| LOC387703 | 0          | 0        |
| LOC387720 | 0          | 0        |
| LOC387723 | 0          | 0        |
| LOC387745 | 0          | 0        |
| LOC387763 | 0.01583233 | 0.017986 |
| LOC387770 | 0          | 0        |
| LOC387787 | 1.33598457 | 1.393298 |
| LOC387791 | 0          | 0        |
| LOC387820 | 0          | 0        |
| LOC387845 | 0          | 0        |

|           |            |          |
|-----------|------------|----------|
| LOC387869 | 0          | 0        |
| LOC387876 | 0          | 0        |
| LOC387885 | 0.44439273 | 0.20509  |
| LOC387890 | 0          | 0        |
| LOC387924 | 0          | 0        |
| LOC387933 | 0          | 0        |
| LOC388104 | 0          | 0        |
| LOC388152 | 0          | 0        |
| LOC388181 | 0          | 0        |
| LOC388199 | 0.27825086 | 0.177805 |
| LOC388210 | 0.26446957 | 0.233677 |
| LOC388237 | 0          | 0        |
| LOC388242 | 0          | 0        |
| LOC388248 | 0          | 0        |
| LOC388276 | 0          | 0        |
| LOC388279 | 0.04585677 | 0.104188 |
| LOC388387 | 0          | 0        |
| LOC388428 | 0          | 0        |
| LOC388436 | 0          | 0        |
| LOC388499 | 0          | 0        |
| LOC388514 | 0          | 0        |
| LOC388553 | 0          | 0        |
| LOC388559 | 2.46789763 | 2.091727 |
| LOC388564 | 0.18903894 | 0.167029 |
| LOC388579 | 0          | 0        |
| LOC388588 | 0          | 0        |
| LOC388630 | 0.01155873 | 0.013131 |
| LOC388692 | 0          | 0        |
| LOC388734 | 0          | 0        |
| LOC388789 | 0          | 0        |
| LOC388796 | 0          | 0        |
| LOC388813 | 0.25443195 | 0.105105 |
| LOC388820 | 0          | 0        |
| LOC388849 | 0.32217363 | 0.175041 |
| LOC388882 | 0          | 0        |
| LOC388906 | 0.06371312 | 0.048253 |
| LOC388910 | 0          | 0.033174 |
| LOC388925 | 0          | 0        |
| LOC388931 | 0.25096549 | 0.079195 |
| LOC388946 | 0          | 0        |
| LOC388948 | 0.02043278 | 0.092848 |
| LOC388955 | 0          | 0        |
| LOC388965 | 0          | 0        |
| LOC388996 | 0          | 0        |
| LOC389000 | 0          | 0        |
| LOC389033 | 0          | 0        |
| LOC389043 | 0          | 0        |

|           |            |          |
|-----------|------------|----------|
| LOC389053 | 0          | 0        |
| LOC389102 | 0          | 0        |
| LOC389120 | 0          | 0        |
| LOC389137 | 0.27213428 | 0.295708 |
| LOC389151 | 0.01108931 | 0        |
| LOC389160 | 0          | 0        |
| LOC389168 | 0          | 0        |
| LOC389174 | 0          | 0        |
| LOC389199 | 0          | 0        |
| LOC389203 | 1.72100835 | 1.578207 |
| LOC389217 | 0.18877963 | 0.18765  |
| LOC389223 | 0          | 0        |
| LOC389246 | 0          | 0        |
| LOC389249 | 0          | 0        |
| LOC389257 | 0.01336639 | 0.030369 |
| LOC389300 | 0          | 0        |
| LOC389322 | 0          | 0        |
| LOC389328 | 0          | 0        |
| LOC389332 | 0          | 0        |
| LOC389333 | 0.07374957 | 0.083781 |
| LOC389369 | 0          | 0        |
| LOC389370 | 0          | 0        |
| LOC389386 | 0          | 0        |
| LOC389395 | 0          | 0        |
| LOC389458 | 0          | 0        |
| LOC389465 | 0          | 0        |
| LOC389473 | 0          | 0        |
| LOC389493 | 0          | 0.039809 |
| LOC389599 | 0          | 0        |
| LOC389602 | 0          | 0        |
| LOC389607 | 0          | 0        |
| LOC389634 | 0          | 0        |
| LOC389662 | 0          | 0        |
| LOC389676 | 0          | 0        |
| LOC389705 | 0          | 0        |
| LOC389722 | 0.08502891 | 0.193188 |
| LOC389727 | 0          | 0        |
| LOC389740 | 0          | 0        |
| LOC389747 | 0          | 0        |
| LOC389765 | 0          | 0        |
| LOC389768 | 0          | 0        |
| LOC389787 | 0.8102247  | 0.506235 |
| LOC389791 | 0          | 0        |
| LOC389813 | 0.05021403 | 0.016298 |
| LOC389827 | 0          | 0        |
| LOC389842 | 0.10012062 | 0.085304 |
| LOC389857 | 0          | 0.029488 |



|           |            |          |
|-----------|------------|----------|
| LOC389873 | 0          | 0        |
| LOC389895 | 0          | 0        |
| LOC389901 | 0          | 0        |
| LOC389906 | 0.2733944  | 0.207054 |
| LOC389935 | 0          | 0        |
| LOC389948 | 0          | 0        |
| LOC389970 | 0          | 0        |
| LOC389976 | 0          | 0        |
| LOC389990 | 0          | 0        |
| LOC389997 | 0          | 0        |
| LOC390007 | 0          | 0        |
| LOC390029 | 0          | 0        |
| LOC390031 | 0          | 0        |
| LOC390033 | 0          | 0        |
| LOC390098 | 0          | 0        |
| LOC390099 | 0          | 0        |
| LOC390101 | 0          | 0        |
| LOC390102 | 0          | 0        |
| LOC390203 | 0          | 0        |
| LOC390205 | 0.00947514 | 0.010764 |
| LOC390213 | 0.11356274 | 0.092149 |
| LOC390233 | 0          | 0        |
| LOC390245 | 0          | 0        |
| LOC390250 | 0          | 0        |
| LOC390251 | 0          | 0        |
| LOC390255 | 0          | 0        |
| LOC390282 | 0          | 0        |
| LOC390294 | 0          | 0        |
| LOC390297 | 0          | 0        |
| LOC390298 | 0          | 0        |
| LOC390301 | 0          | 0        |
| LOC390306 | 0          | 0        |
| LOC390308 | 0          | 0        |
| LOC390311 | 0          | 0        |
| LOC390314 | 0          | 0        |
| LOC390332 | 0          | 0        |
| LOC390340 | 0          | 0        |
| LOC390352 | 0          | 0        |
| LOC390358 | 0          | 0        |
| LOC390363 | 0          | 0        |
| LOC390378 | 0          | 0        |
| LOC390394 | 0          | 0        |
| LOC390403 | 0          | 0        |
| LOC390407 | 0          | 0        |
| LOC390411 | 0          | 0        |
| LOC390415 | 0          | 0        |
| LOC390419 | 0          | 0        |

|           |            |          |
|-----------|------------|----------|
| LOC390421 | 0          | 0        |
| LOC390424 | 0          | 0        |
| LOC390472 | 0          | 0        |
| LOC390483 | 0          | 0        |
| LOC390501 | 0          | 0        |
| LOC390503 | 0          | 0        |
| LOC390561 | 0.87855134 | 0.861951 |
| LOC390572 | 0          | 0        |
| LOC390586 | 0          | 0        |
| LOC390594 | 0          | 0.017346 |
| LOC390595 | 0.98285232 | 0.941393 |
| LOC390600 | 0          | 0        |
| LOC390614 | 0          | 0        |
| LOC390617 | 0          | 0        |
| LOC390618 | 0          | 0        |
| LOC390627 | 0          | 0        |
| LOC390638 | 0          | 0        |
| LOC390643 | 0          | 0        |
| LOC390705 | 0          | 0        |
| LOC390714 | 0          | 0        |
| LOC390730 | 0          | 0        |
| LOC390732 | 0          | 0        |
| LOC390739 | 0          | 0        |
| LOC390748 | 0.36250571 | 0.32945  |
| LOC390760 | 0.81283496 | 0.677155 |
| LOC390791 | 0          | 0        |
| LOC390800 | 0          | 0        |
| LOC390806 | 0          | 0        |
| LOC390811 | 0          | 0        |
| LOC390831 | 0          | 0        |
| LOC390834 | 0          | 0        |
| LOC390843 | 0          | 0        |
| LOC390846 | 0          | 0        |
| LOC390858 | 0          | 0        |
| LOC390860 | 0          | 0        |
| LOC390876 | 0          | 0        |
| LOC390877 | 0          | 0        |
| LOC390930 | 0          | 0        |
| LOC390933 | 0          | 0        |
| LOC390937 | 0.35535771 | 0.426119 |
| LOC390940 | 0.08605183 | 0        |
| LOC390948 | 0          | 0        |
| LOC390956 | 0          | 0.085152 |
| LOC390996 | 0          | 0        |
| LOC390997 | 0          | 0        |
| LOC390998 | 0          | 0.052727 |
| LOC391012 | 0          | 0        |

|           |            |          |
|-----------|------------|----------|
| LOC391020 | 0          | 0        |
| LOC391026 | 0          | 0        |
| LOC391040 | 0          | 0        |
| LOC391044 | 0          | 0        |
| LOC391048 | 0          | 0        |
| LOC391053 | 0          | 0        |
| LOC391073 | 0          | 0        |
| LOC391075 | 0          | 0        |
| LOC391076 | 0          | 0        |
| LOC391081 | 0          | 0        |
| LOC391092 | 0          | 0        |
| LOC391106 | 0          | 0        |
| LOC391136 | 0          | 0        |
| LOC391158 | 0          | 0        |
| LOC391160 | 0          | 0        |
| LOC391162 | 0          | 0        |
| LOC391169 | 0          | 0        |
| LOC391171 | 0          | 0        |
| LOC391174 | 0          | 0        |
| LOC391183 | 0          | 0        |
| LOC391230 | 0          | 0        |
| LOC391239 | 0          | 0        |
| LOC391242 | 0          | 0        |
| LOC391247 | 0          | 0        |
| LOC391266 | 0          | 0        |
| LOC391276 | 0          | 0        |
| LOC391322 | 0          | 0        |
| LOC391334 | 0          | 0        |
| LOC391343 | 0          | 0        |
| LOC391349 | 0          | 0        |
| LOC391358 | 0.10306535 | 0.117084 |
| LOC391359 | 0.14911582 | 0.084699 |
| LOC391367 | 0          | 0        |
| LOC391378 | 0          | 0        |
| LOC391383 | 0          | 0        |
| LOC391405 | 0          | 0        |
| LOC391428 | 0          | 0        |
| LOC391436 | 0          | 0        |
| LOC391448 | 0          | 0        |
| LOC391465 | 0          | 0        |
| LOC391470 | 0          | 0        |
| LOC391472 | 0          | 0        |
| LOC391508 | 0          | 0        |
| LOC391524 | 0          | 0        |
| LOC391526 | 0          | 0        |
| LOC391530 | 0          | 0        |
| LOC391532 | 0          | 0        |

|           |            |          |
|-----------|------------|----------|
| LOC391533 | 0          | 0        |
| LOC391552 | 0          | 0        |
| LOC391556 | 0          | 0        |
| LOC391559 | 0          | 0        |
| LOC391562 | 0          | 0        |
| LOC391566 | 0          | 0        |
| LOC391578 | 0          | 0        |
| LOC391587 | 0          | 0        |
| LOC391600 | 0          | 0        |
| LOC391603 | 0          | 0        |
| LOC391636 | 0          | 0        |
| LOC391640 | 0          | 0        |
| LOC391642 | 0          | 0        |
| LOC391657 | 0          | 0        |
| LOC391670 | 0          | 0        |
| LOC391672 | 0          | 0        |
| LOC391674 | 0          | 0        |
| LOC391681 | 0          | 0        |
| LOC391686 | 0          | 0        |
| LOC391696 | 0          | 0        |
| LOC391697 | 0          | 0        |
| LOC391698 | 0          | 0        |
| LOC391707 | 0          | 0        |
| LOC391710 | 0          | 0        |
| LOC391711 | 0          | 0        |
| LOC391713 | 0          | 0        |
| LOC391718 | 0          | 0        |
| LOC391722 | 0.07416342 | 0.189564 |
| LOC391739 | 0          | 0        |
| LOC391741 | 0          | 0        |
| LOC391742 | 0          | 0        |
| LOC391744 | 0          | 0        |
| LOC391746 | 0          | 0        |
| LOC391747 | 0          | 0        |
| LOC391764 | 0          | 0        |
| LOC391765 | 0          | 0        |
| LOC391766 | 0          | 0        |
| LOC391767 | 0          | 0        |
| LOC391768 | 0          | 0        |
| LOC391769 | 0          | 0        |
| LOC391771 | 0          | 0        |
| LOC391798 | 0          | 0        |
| LOC391804 | 0          | 0        |
| LOC391807 | 0          | 0        |
| LOC391811 | 0          | 0        |
| LOC391813 | 0          | 0        |
| LOC391834 | 0          | 0        |

|           |            |          |
|-----------|------------|----------|
| LOC391844 | 0          | 0        |
| LOC392027 | 0          | 0        |
| LOC392100 | 0          | 0        |
| LOC392145 | 0          | 0        |
| LOC392180 | 0          | 0        |
| LOC392181 | 0          | 0        |
| LOC392187 | 0          | 0        |
| LOC392196 | 0          | 0        |
| LOC392209 | 0          | 0        |
| LOC392217 | 0          | 0        |
| LOC392221 | 0          | 0        |
| LOC392225 | 0          | 0        |
| LOC392226 | 0          | 0        |
| LOC392232 | 0          | 0        |
| LOC392264 | 0          | 0        |
| LOC392265 | 0          | 0        |
| LOC392266 | 0          | 0        |
| LOC392268 | 0          | 0        |
| LOC392275 | 0.04521577 | 0.051366 |
| LOC392281 | 0          | 0        |
| LOC392285 | 0          | 0        |
| LOC392288 | 0.01854086 | 0        |
| LOC392292 | 0          | 0        |
| LOC392298 | 0          | 0        |
| LOC392310 | 0          | 0        |
| LOC392322 | 0          | 0        |
| LOC392334 | 0          | 0        |
| LOC392335 | 0          | 0        |
| LOC392343 | 0          | 0        |
| LOC392350 | 0          | 0        |
| LOC392352 | 0.12627826 | 0.107591 |
| LOC392364 | 0          | 0        |
| LOC392368 | 0          | 0        |
| LOC392374 | 0          | 0        |
| LOC392387 | 0          | 0        |
| LOC392426 | 0          | 0        |
| LOC392435 | 0          | 0        |
| LOC392436 | 0          | 0        |
| LOC392437 | 0          | 0        |
| LOC392439 | 0          | 0        |
| LOC392440 | 0          | 0        |
| LOC392442 | 0          | 0        |
| LOC392452 | 0          | 0        |
| LOC392454 | 0          | 0        |
| LOC392456 | 0          | 0        |
| LOC392477 | 0          | 0        |
| LOC392485 | 0          | 0        |

|           |            |          |
|-----------|------------|----------|
| LOC392489 | 0          | 0        |
| LOC392508 | 0          | 0        |
| LOC392510 | 0          | 0        |
| LOC392529 | 0          | 0        |
| LOC392536 | 0          | 0        |
| LOC392538 | 0          | 0        |
| LOC392539 | 0          | 0        |
| LOC392543 | 0          | 0        |
| LOC392545 | 0          | 0        |
| LOC392555 | 0          | 0        |
| LOC392787 | 0          | 0        |
| LOC393076 | 0          | 0        |
| LOC393078 | 0          | 0        |
| LOC399715 | 0.18856799 | 0.214216 |
| LOC399744 | 0          | 0        |
| LOC399748 | 0          | 0        |
| LOC399774 | 0          | 0        |
| LOC399783 | 0          | 0        |
| LOC399804 | 0          | 0        |
| LOC399815 | 0          | 0        |
| LOC399839 | 0          | 0        |
| LOC399881 | 0          | 0        |
| LOC399900 | 0          | 0        |
| LOC399937 | 0          | 0        |
| LOC399939 | 0          | 0        |
| LOC399940 | 0          | 0        |
| LOC399942 | 0          | 0        |
| LOC399950 | 0          | 0        |
| LOC399959 | 0          | 0        |
| LOC399965 | 0          | 0        |
| LOC399988 | 0          | 0        |
| LOC399994 | 0          | 0        |
| LOC400013 | 0          | 0        |
| LOC400026 | 0          | 0        |
| LOC400027 | 9.57693322 | 6.497357 |
| LOC400036 | 0          | 0        |
| LOC400043 | 0          | 0        |
| LOC400061 | 0          | 0        |
| LOC400094 | 0          | 0        |
| LOC400099 | 0          | 0        |
| LOC400126 | 0          | 0        |
| LOC400129 | 0          | 0        |
| LOC400174 | 0          | 0        |
| LOC400236 | 0          | 0.014845 |
| LOC400347 | 0          | 0        |
| LOC400352 | 2.93799086 | 2.742904 |
| LOC400406 | 0          | 0        |

|           |            |          |
|-----------|------------|----------|
| LOC400419 | 0          | 0        |
| LOC400446 | 0          | 0        |
| LOC400456 | 0          | 0        |
| LOC400464 | 0          | 0        |
| LOC400499 | 0          | 0        |
| LOC400553 | 0.92714831 | 0.815423 |
| LOC400558 | 0          | 0        |
| LOC400578 | 0          | 0        |
| LOC400581 | 0          | 0.123501 |
| LOC400590 | 0          | 0        |
| LOC400657 | 0          | 0        |
| LOC400682 | 0.15035277 | 0.157139 |
| LOC400696 | 0          | 0        |
| LOC400713 | 1.57875718 | 1.424245 |
| LOC400723 | 0          | 0        |
| LOC400743 | 0          | 0        |
| LOC400750 | 0          | 0        |
| LOC400752 | 0          | 0        |
| LOC400759 | 0          | 0        |
| LOC400769 | 0          | 0        |
| LOC400794 | 0          | 0        |
| LOC400804 | 0          | 0        |
| LOC400831 | 0.01310806 | 0.119128 |
| LOC400836 | 0          | 0        |
| LOC400879 | 0          | 0        |
| LOC400891 | 0          | 0        |
| LOC400927 | 0          | 0        |
| LOC400931 | 0          | 0        |
| LOC400940 | 0          | 0        |
| LOC400950 | 0          | 0        |
| LOC400965 | 0          | 0        |
| LOC400986 | 0.70538663 | 0.71027  |
| LOC401002 | 0          | 0        |
| LOC401010 | 0          | 0        |
| LOC401018 | 0          | 0        |
| LOC401052 | 0.36575431 | 0.327366 |
| LOC401068 | 0          | 0        |
| LOC401076 | 0          | 0        |
| LOC401093 | 0          | 0        |
| LOC401097 | 0          | 0.008892 |
| LOC401098 | 0          | 0        |
| LOC401127 | 0          | 0        |
| LOC401180 | 0          | 0.02488  |
| LOC401218 | 0          | 0        |
| LOC401233 | 0          | 0        |
| LOC401286 | 0          | 0        |
| LOC401296 | 0          | 0        |

|           |            |          |
|-----------|------------|----------|
| LOC401308 | 0          | 0        |
| LOC401316 | 0          | 0        |
| LOC401321 | 3.27685154 | 4.74201  |
| LOC401357 | 0          | 0        |
| LOC401397 | 0          | 0        |
| LOC401399 | 0.00613341 | 0.013935 |
| LOC401431 | 0          | 0        |
| LOC401433 | 0          | 0        |
| LOC401442 | 0          | 0        |
| LOC401447 | 0          | 0        |
| LOC401463 | 0          | 0        |
| LOC401525 | 0          | 0        |
| LOC401533 | 0          | 0        |
| LOC401561 | 0          | 0        |
| LOC401588 | 0          | 0        |
| LOC401589 | 0          | 0        |
| LOC401602 | 0          | 0        |
| LOC401646 | 0          | 0        |
| LOC401648 | 0          | 0        |
| LOC401676 | 0          | 0        |
| LOC401677 | 0          | 0        |
| LOC401679 | 0          | 0        |
| LOC401703 | 0          | 0        |
| LOC401717 | 0          | 0        |
| LOC401730 | 0          | 0        |
| LOC401744 | 0          | 0        |
| LOC401767 | 0          | 0        |
| LOC401770 | 0          | 0        |
| LOC401777 | 0          | 0        |
| LOC401805 | 0          | 0        |
| LOC401822 | 0          | 0        |
| LOC401825 | 0          | 0        |
| LOC401847 | 0.18814614 | 0        |
| LOC401859 | 0.04273441 | 0.048547 |
| LOC401864 | 0          | 0        |
| LOC401875 | 0          | 0        |
| LOC401913 | 0          | 0        |
| LOC401914 | 0          | 0        |
| LOC401934 | 0          | 0.015089 |
| LOC401957 | 0          | 0        |
| LOC401959 | 0          | 0        |
| LOC401960 | 0          | 0        |
| LOC401980 | 0          | 0        |
| LOC401981 | 0          | 0        |
| LOC402036 | 0.88064213 | 0.708633 |
| LOC402076 | 0          | 0        |
| LOC402093 | 0          | 0        |



|           |            |          |
|-----------|------------|----------|
| LOC402096 | 0          | 0        |
| LOC402112 | 0          | 0        |
| LOC402116 | 0          | 0        |
| LOC402125 | 0          | 0        |
| LOC402143 | 0          | 0        |
| LOC402152 | 0          | 0        |
| LOC402160 | 0.06094299 | 0.017308 |
| LOC402175 | 0          | 0        |
| LOC402182 | 0          | 0        |
| LOC402191 | 0          | 0        |
| LOC402192 | 0          | 0        |
| LOC402198 | 0          | 0        |
| LOC402207 | 0          | 0        |
| LOC402213 | 0          | 0        |
| LOC402216 | 0          | 0        |
| LOC402221 | 0          | 0        |
| LOC402226 | 0          | 0        |
| LOC402229 | 0          | 0        |
| LOC402230 | 0          | 0        |
| LOC402269 | 0          | 0        |
| LOC402273 | 0          | 0        |
| LOC402279 | 0          | 0        |
| LOC402329 | 0          | 0        |
| LOC402359 | 0          | 0        |
| LOC402360 | 0.02511987 | 0.057073 |
| LOC402375 | 0          | 0        |
| LOC402382 | 0          | 0        |
| LOC402408 | 0          | 0        |
| LOC402420 | 0          | 0        |
| LOC402422 | 0          | 0        |
| LOC402425 | 0          | 0        |
| LOC402509 | 0          | 0        |
| LOC402562 | 0          | 0        |
| LOC402634 | 0          | 0        |
| LOC402641 | 0          | 0        |
| LOC402643 | 0          | 0        |
| LOC402644 | 0          | 0        |
| LOC402676 | 0          | 0        |
| LOC402679 | 0          | 0        |
| LOC402715 | 0          | 0        |
| LOC404266 | 0          | 0        |
| LOC404718 | 0          | 0        |
| LOC407835 | 0          | 0        |
| LOC415056 | 0          | 0        |
| LOC439949 | 0.11124514 | 0.021063 |
| LOC439951 | 0          | 0        |
| LOC439953 | 0          | 0        |

|           |            |          |
|-----------|------------|----------|
| LOC439962 | 0          | 0        |
| LOC439994 | 0          | 0        |
| LOC440013 | 0          | 0        |
| LOC440014 | 0          | 0        |
| LOC440017 | 0          | 0        |
| LOC440031 | 0          | 0        |
| LOC440040 | 0          | 0        |
| LOC440041 | 0          | 0        |
| LOC440043 | 0          | 0        |
| LOC440059 | 0          | 0        |
| LOC440061 | 0          | 0        |
| LOC440063 | 0          | 0        |
| LOC440067 | 0          | 0        |
| LOC440082 | 0          | 0        |
| LOC440093 | 1.41229754 | 1.197645 |
| LOC440104 | 0.9075036  | 0.877829 |
| LOC440122 | 0          | 0        |
| LOC440125 | 0          | 0        |
| LOC440142 | 0          | 0        |
| LOC440180 | 0          | 0        |
| LOC440181 | 0          | 0        |
| LOC440233 | 0          | 0        |
| LOC440243 | 0.02338746 | 0.106274 |
| LOC440248 | 0          | 0        |
| LOC440292 | 0.02031433 | 0.023077 |
| LOC440295 | 0.35082267 | 0.327567 |
| LOC440297 | 0          | 0        |
| LOC440300 | 0          | 0        |
| LOC440311 | 0          | 0        |
| LOC440313 | 0          | 0        |
| LOC440335 | 0.02057273 | 0.046742 |
| LOC440345 | 0          | 0        |
| LOC440353 | 0          | 0        |
| LOC440354 | 0          | 0        |
| LOC440356 | 0          | 0        |
| LOC440361 | 0          | 0        |
| LOC440366 | 0          | 0        |
| LOC440386 | 0          | 0        |
| LOC440396 | 0          | 0        |
| LOC440419 | 0          | 0        |
| LOC440459 | 0          | 0        |
| LOC440461 | 0          | 0        |
| LOC440489 | 0          | 0        |
| LOC440498 | 4.03686354 | 3.152834 |
| LOC440514 | 0          | 0        |
| LOC440518 | 0          | 0        |
| LOC440525 | 0          | 0        |

|           |            |          |
|-----------|------------|----------|
| LOC440563 | 0.10429232 | 0.094782 |
| LOC440568 | 0          | 0        |
| LOC440570 | 0          | 0        |
| LOC440577 | 0.02441966 | 0.083223 |
| LOC440606 | 0          | 0        |
| LOC440700 | 0          | 0        |
| LOC440742 | 0          | 0        |
| LOC440786 | 0          | 0        |
| LOC440792 | 0          | 0        |
| LOC440795 | 0          | 0.125053 |
| LOC440829 | 0.12794319 | 0.145345 |
| LOC440871 | 0.04610818 | 0        |
| LOC440888 | 0          | 0        |
| LOC440895 | 0          | 0        |
| LOC440896 | 0          | 0        |
| LOC440900 | 0          | 0        |
| LOC440902 | 0          | 0        |
| LOC440905 | 0          | 0        |
| LOC440917 | 0          | 0        |
| LOC440925 | 0          | 0        |
| LOC440926 | 0          | 0        |
| LOC440934 | 0          | 0        |
| LOC440944 | 0          | 0        |
| LOC440957 | 2.01356176 | 2.340634 |
| LOC440973 | 0          | 0        |
| LOC440981 | 0          | 0        |
| LOC440993 | 0          | 0        |
| LOC440995 | 0.53853569 | 0.356875 |
| LOC441005 | 0          | 0        |
| LOC441009 | 0.03082893 | 0.140089 |
| LOC441016 | 0.07673478 | 0.087172 |
| LOC441026 | 0          | 0        |
| LOC441046 | 0          | 0        |
| LOC441050 | 0          | 0        |
| LOC441052 | 0          | 0        |
| LOC441056 | 0          | 0        |
| LOC441066 | 0          | 0        |
| LOC441081 | 0          | 0        |
| LOC441086 | 0.02366385 | 0        |
| LOC441089 | 0          | 0        |
| LOC441098 | 0          | 0        |
| LOC441124 | 0          | 0        |
| LOC441131 | 0          | 0        |
| LOC441155 | 0          | 0        |
| LOC441166 | 0          | 0        |
| LOC441167 | 0          | 0        |
| LOC441177 | 0          | 0        |

|           |            |          |
|-----------|------------|----------|
| LOC441178 | 0          | 0        |
| LOC441179 | 0          | 0        |
| LOC441204 | 0          | 0        |
| LOC441208 | 0          | 0        |
| LOC441228 | 0          | 0        |
| LOC441238 | 0          | 0        |
| LOC441239 | 0.19913494 | 0.188517 |
| LOC441241 | 0          | 0        |
| LOC441242 | 0          | 0        |
| LOC441258 | 0          | 0        |
| LOC441259 | 0          | 0        |
| LOC441268 | 0          | 0        |
| LOC441294 | 0.01785591 | 0.010142 |
| LOC441320 | 0          | 0        |
| LOC441410 | 0          | 0        |
| LOC441416 | 0          | 0        |
| LOC441420 | 0          | 0        |
| LOC441442 | 0          | 0        |
| LOC441454 | 0.40086427 | 0.364311 |
| LOC441455 | 0          | 0        |
| LOC441461 | 0          | 0        |
| LOC441476 | 0.23301731 | 0.183262 |
| LOC441481 | 0          | 0        |
| LOC441484 | 0          | 0        |
| LOC441487 | 0          | 0        |
| LOC441488 | 0          | 0        |
| LOC441493 | 0          | 0        |
| LOC441495 | 0          | 0        |
| LOC441505 | 0          | 0        |
| LOC441511 | 0          | 0        |
| LOC441528 | 0          | 0        |
| LOC441548 | 0          | 0        |
| LOC441554 | 0          | 0        |
| LOC441572 | 0          | 0        |
| LOC441584 | 0          | 0        |
| LOC441592 | 0          | 0        |
| LOC441601 | 0          | 0        |
| LOC441609 | 0          | 0        |
| LOC441617 | 0.03631318 | 0.041252 |
| LOC441623 | 0          | 0        |
| LOC441643 | 0          | 0        |
| LOC441644 | 0.07874656 | 0.089457 |
| LOC441654 | 0          | 0        |
| LOC441666 | 0          | 0        |
| LOC441687 | 0          | 0.109314 |
| LOC441698 | 0          | 0        |
| LOC441711 | 0          | 0        |

|           |            |          |
|-----------|------------|----------|
| LOC441722 | 0.04672296 | 0.026539 |
| LOC441728 | 0          | 0        |
| LOC441730 | 0          | 0        |
| LOC441732 | 0          | 0        |
| LOC441734 | 0          | 0        |
| LOC441736 | 0          | 0        |
| LOC441750 | 0          | 0        |
| LOC441768 | 0          | 0        |
| LOC441783 | 0          | 0        |
| LOC441784 | 0          | 0        |
| LOC441795 | 0          | 0        |
| LOC441806 | 0          | 0.082934 |
| LOC441811 | 0          | 0        |
| LOC441843 | 0          | 0        |
| LOC441849 | 0          | 0        |
| LOC441862 | 0          | 0        |
| LOC441864 | 0.09375844 | 0.026628 |
| LOC441869 | 0          | 0        |
| LOC441870 | 0          | 0        |
| LOC441880 | 0          | 0        |
| LOC441884 | 0          | 0        |
| LOC441887 | 0          | 0        |
| LOC441893 | 0          | 0        |
| LOC441897 | 0          | 0        |
| LOC441899 | 0          | 0        |
| LOC441900 | 0          | 0        |
| LOC441904 | 0          | 0        |
| LOC441907 | 0          | 0        |
| LOC441914 | 0          | 0        |
| LOC441915 | 0          | 0        |
| LOC441931 | 0          | 0        |
| LOC441938 | 0          | 0        |
| LOC441940 | 0          | 0        |
| LOC441956 | 0.01143302 | 0        |
| LOC441957 | 0          | 0        |
| LOC441958 | 0          | 0        |
| LOC441996 | 0          | 0        |
| LOC442006 | 0          | 0        |
| LOC442017 | 0          | 0        |
| LOC442028 | 0          | 0        |
| LOC442041 | 0          | 0        |
| LOC442042 | 0          | 0        |
| LOC442058 | 0          | 0        |
| LOC442060 | 0          | 0        |
| LOC442063 | 0          | 0        |
| LOC442064 | 0          | 0        |
| LOC442075 | 0          | 0        |

|           |   |         |
|-----------|---|---------|
| LOC442087 | 0 | 0       |
| LOC442097 | 0 | 0       |
| LOC442098 | 0 | 0       |
| LOC442112 | 0 | 0       |
| LOC442113 | 0 | 0       |
| LOC442131 | 0 | 0       |
| LOC442132 | 0 | 0       |
| LOC442142 | 0 | 0.01432 |
| LOC442153 | 0 | 0       |
| LOC442155 | 0 | 0       |
| LOC442156 | 0 | 0       |
| LOC442157 | 0 | 0       |
| LOC442161 | 0 | 0       |
| LOC442167 | 0 | 0       |
| LOC442172 | 0 | 0       |
| LOC442192 | 0 | 0       |
| LOC442210 | 0 | 0       |
| LOC442211 | 0 | 0       |
| LOC442215 | 0 | 0       |
| LOC442221 | 0 | 0       |
| LOC442225 | 0 | 0       |
| LOC442227 | 0 | 0       |
| LOC442233 | 0 | 0       |
| LOC442234 | 0 | 0       |
| LOC442239 | 0 | 0       |
| LOC442244 | 0 | 0       |
| LOC442245 | 0 | 0       |
| LOC442249 | 0 | 0       |
| LOC442253 | 0 | 0       |
| LOC442256 | 0 | 0       |
| LOC442261 | 0 | 0       |
| LOC442263 | 0 | 0       |
| LOC442266 | 0 | 0       |
| LOC442267 | 0 | 0       |
| LOC442271 | 0 | 0       |
| LOC442272 | 0 | 0       |
| LOC442290 | 0 | 0       |
| LOC442291 | 0 | 0       |
| LOC442292 | 0 | 0       |
| LOC442293 | 0 | 0       |
| LOC442304 | 0 | 0       |
| LOC442308 | 0 | 0       |
| LOC442309 | 0 | 0       |
| LOC442317 | 0 | 0       |
| LOC442318 | 0 | 0       |
| LOC442320 | 0 | 0       |
| LOC442382 | 0 | 0       |

|           |            |          |
|-----------|------------|----------|
| LOC442389 | 0          | 0        |
| LOC442396 | 0          | 0        |
| LOC442405 | 0          | 0        |
| LOC442415 | 0          | 0        |
| LOC442416 | 0          | 0        |
| LOC442421 | 0          | 0        |
| LOC442427 | 0          | 0        |
| LOC442434 | 0          | 0        |
| LOC442443 | 0          | 0        |
| LOC442445 | 0          | 0        |
| LOC442446 | 0          | 0        |
| LOC442447 | 0          | 0        |
| LOC442454 | 0          | 0        |
| LOC442459 | 0          | 0        |
| LOC442460 | 0          | 0        |
| LOC442465 | 0          | 0        |
| LOC442517 | 0          | 0        |
| LOC442572 | 0.09292964 | 0.026392 |
| LOC442603 | 0          | 0        |
| LOC442609 | 0.0241393  | 0        |
| LOC442661 | 0          | 0        |
| LOC442668 | 0          | 0        |
| LOC442676 | 0          | 0        |
| LOC442707 | 0          | 0        |
| LOC442709 | 0          | 0        |
| LOC442710 | 0          | 0        |
| LOC442713 | 0          | 0        |
| LOC442727 | 0          | 0        |
| LOC442730 | 0          | 0        |
| LOC442777 | 0          | 0        |
| LOC449518 | 0          | 0        |
| LOC492303 | 0          | 0        |
| LOC493754 | 0          | 0        |
| LOC494127 | 0          | 0        |
| LOC494141 | 0          | 0        |
| LOC494150 | 0          | 0        |
| LOC503540 | 0          | 0        |
| LOC503543 | 0          | 0        |
| LOC51145  | 0          | 0        |
| LOC541471 | 0          | 0        |
| LOC541472 | 0          | 0        |
| LOC541473 | 0          | 0        |
| LOC548599 | 0          | 0        |
| LOC550112 | 0          | 0        |
| LOC550643 | 0          | 0        |
| LOC550644 | 0          | 0        |
| LOC552889 | 24.5600077 | 23.32723 |

|           |   |          |
|-----------|---|----------|
| LOC553137 | 0 | 0        |
| LOC553139 | 0 | 0        |
| LOC553148 | 0 | 0        |
| LOC553158 | 0 | 0.013633 |
| LOC553820 | 0 | 0        |
| LOC553939 | 0 | 0        |
| LOC554049 | 0 | 0        |
| LOC554202 | 0 | 0        |
| LOC554203 | 0 | 0        |
| LOC554206 | 0 | 0        |
| LOC554207 | 0 | 0        |
| LOC55908  | 0 | 0        |
| LOC572558 | 0 | 0        |
| LOC574080 | 0 | 0        |
| LOC595101 | 0 | 0        |
| LOC606724 | 0 | 0        |
| LOC613037 | 0 | 0        |
| LOC613038 | 0 | 0        |
| LOC619207 | 0 | 0        |
| LOC641298 | 0 | 0        |
| LOC641367 | 0 | 0        |
| LOC641378 | 0 | 0        |
| LOC641379 | 0 | 0        |
| LOC641380 | 0 | 0        |
| LOC641381 | 0 | 0        |
| LOC641382 | 0 | 0        |
| LOC641456 | 0 | 0        |
| LOC641457 | 0 | 0        |
| LOC641467 | 0 | 0        |
| LOC641515 | 0 | 0        |
| LOC641695 | 0 | 0        |
| LOC641708 | 0 | 0        |
| LOC641719 | 0 | 0        |
| LOC641746 | 0 | 0        |
| LOC641776 | 0 | 0        |
| LOC641924 | 0 | 0        |
| LOC642006 | 0 | 0        |
| LOC642007 | 0 | 0        |
| LOC642131 | 0 | 0.028639 |
| LOC642236 | 0 | 0        |
| LOC642262 | 0 | 0        |
| LOC642288 | 0 | 0        |
| LOC642290 | 0 | 0        |
| LOC642305 | 0 | 0        |
| LOC642311 | 0 | 0        |
| LOC642313 | 0 | 0        |
| LOC642319 | 0 | 0        |



|           |            |          |
|-----------|------------|----------|
| LOC642325 | 0          | 0        |
| LOC642337 | 2.17129063 | 1.726634 |
| LOC642340 | 0.02441966 | 0.110965 |
| LOC642350 | 0          | 0        |
| LOC642355 | 0          | 0        |
| LOC642357 | 0          | 0        |
| LOC642361 | 0          | 0        |
| LOC642366 | 0          | 0        |
| LOC642373 | 0          | 0        |
| LOC642381 | 0          | 0        |
| LOC642389 | 0          | 0        |
| LOC642395 | 0          | 0        |
| LOC642397 | 0.85028912 | 1.141568 |
| LOC642402 | 0          | 0        |
| LOC642406 | 0.14637889 | 0.151172 |
| LOC642413 | 0          | 0        |
| LOC642414 | 0          | 0        |
| LOC642423 | 0.12813813 | 0.21835  |
| LOC642424 | 0          | 0        |
| LOC642425 | 0          | 0        |
| LOC642441 | 0.56120998 | 2.140324 |
| LOC642446 | 0          | 0        |
| LOC642461 | 0          | 0        |
| LOC642474 | 0          | 0        |
| LOC642487 | 0          | 0        |
| LOC642490 | 0          | 0        |
| LOC642496 | 0          | 0        |
| LOC642502 | 0.25766337 | 0.29271  |
| LOC642513 | 0          | 0        |
| LOC642515 | 0.19400536 | 0.413237 |
| LOC642521 | 0          | 0.050391 |
| LOC642533 | 0          | 0        |
| LOC642538 | 0.0490101  | 0.055676 |
| LOC642545 | 0          | 0        |
| LOC642550 | 0          | 0        |
| LOC642554 | 0          | 0        |
| LOC642574 | 0.01206273 | 0.013703 |
| LOC642579 | 0          | 0        |
| LOC642580 | 0          | 0        |
| LOC642585 | 0          | 0        |
| LOC642587 | 0          | 0        |
| LOC642590 | 0          | 0        |
| LOC642597 | 0          | 0        |
| LOC642614 | 0          | 0        |
| LOC642622 | 0          | 0        |
| LOC642627 | 0          | 0        |
| LOC642633 | 0          | 0        |

|           |            |          |
|-----------|------------|----------|
| LOC642635 | 0          | 0        |
| LOC642648 | 0          | 0        |
| LOC642652 | 0          | 0        |
| LOC642659 | 0          | 0        |
| LOC642661 | 0          | 0        |
| LOC642663 | 0          | 0        |
| LOC642666 | 0          | 0        |
| LOC642669 | 0          | 0        |
| LOC642677 | 0          | 0        |
| LOC642683 | 0          | 0        |
| LOC642692 | 0          | 0        |
| LOC642721 | 0          | 0        |
| LOC642737 | 0          | 0        |
| LOC642746 | 0          | 0        |
| LOC642762 | 0          | 0        |
| LOC642776 | 0          | 0        |
| LOC642778 | 0.01477017 | 0.058727 |
| LOC642781 | 0          | 0        |
| LOC642791 | 0          | 0        |
| LOC642799 | 0.01477017 | 0.041948 |
| LOC642818 | 0          | 0        |
| LOC642826 | 0          | 0        |
| LOC642838 | 0          | 0        |
| LOC642840 | 0          | 0        |
| LOC642846 | 0          | 0        |
| LOC642850 | 0          | 0        |
| LOC642852 | 0          | 0        |
| LOC642862 | 0          | 0        |
| LOC642864 | 0          | 0        |
| LOC642869 | 0          | 0        |
| LOC642879 | 0          | 0        |
| LOC642888 | 0          | 0        |
| LOC642890 | 0          | 0        |
| LOC642891 | 0          | 0        |
| LOC642897 | 0          | 0        |
| LOC642907 | 0          | 0        |
| LOC642909 | 0          | 0        |
| LOC642934 | 0.19247745 | 0.257244 |
| LOC642935 | 0          | 0        |
| LOC642943 | 0          | 0        |
| LOC642952 | 0          | 0        |
| LOC642958 | 0          | 0        |
| LOC642959 | 0          | 0        |
| LOC642969 | 0          | 0        |
| LOC642975 | 0          | 0        |
| LOC642996 | 0          | 0        |
| LOC643008 | 0          | 0        |

|           |            |          |
|-----------|------------|----------|
| LOC643014 | 0          | 0        |
| LOC643015 | 0          | 0        |
| LOC643031 | 0          | 0        |
| LOC643037 | 0          | 0        |
| LOC643043 | 1.10659637 | 0.65023  |
| LOC643058 | 0          | 0        |
| LOC643064 | 0          | 0        |
| LOC643067 | 0          | 0        |
| LOC643072 | 0          | 0        |
| LOC643085 | 0          | 0        |
| LOC643095 | 0          | 0        |
| LOC643106 | 0          | 0        |
| LOC643118 | 0          | 0        |
| LOC643126 | 0          | 0        |
| LOC643153 | 0.0259572  | 0.019659 |
| LOC643157 | 0          | 0        |
| LOC643167 | 0          | 0        |
| LOC643168 | 0          | 0        |
| LOC643172 | 0          | 0        |
| LOC643180 | 0          | 0        |
| LOC643181 | 0          | 0        |
| LOC643182 | 0          | 0        |
| LOC643193 | 0          | 0        |
| LOC643198 | 0          | 0        |
| LOC643201 | 0          | 0        |
| LOC643219 | 0          | 0        |
| LOC643224 | 0          | 0        |
| LOC643228 | 0          | 0        |
| LOC643232 | 0          | 0        |
| LOC643244 | 0          | 0        |
| LOC643255 | 0          | 0        |
| LOC643263 | 0          | 0        |
| LOC643276 | 0          | 0        |
| LOC643307 | 0          | 0        |
| LOC643308 | 0          | 0        |
| LOC643309 | 0          | 0        |
| LOC643310 | 0          | 0        |
| LOC643327 | 0          | 0        |
| LOC643329 | 0          | 0        |
| LOC643332 | 0          | 0        |
| LOC643339 | 0          | 0        |
| LOC643342 | 0          | 0        |
| LOC643348 | 0          | 0        |
| LOC643353 | 0          | 0        |
| LOC643355 | 0          | 0.014067 |
| LOC643367 | 0          | 0        |
| LOC643368 | 0          | 0        |

|           |            |          |
|-----------|------------|----------|
| LOC643371 | 0          | 0        |
| LOC643373 | 0          | 0        |
| LOC643376 | 0.15865571 | 0.180235 |
| LOC643381 | 0          | 0        |
| LOC643387 | 0          | 0        |
| LOC643395 | 0.31627378 | 0.218699 |
| LOC643406 | 0.07662293 | 0.034818 |
| LOC643412 | 0          | 0        |
| LOC643421 | 0.10618854 | 0        |
| LOC643438 | 0          | 0        |
| LOC643445 | 0          | 0        |
| LOC643446 | 0.2496158  | 0.392632 |
| LOC643447 | 0          | 0        |
| LOC643454 | 0          | 0        |
| LOC643459 | 0          | 0        |
| LOC643479 | 0.06653586 | 0        |
| LOC643486 | 0          | 0        |
| LOC643494 | 0          | 0        |
| LOC643496 | 0          | 0        |
| LOC643513 | 0          | 0        |
| LOC643519 | 0          | 0        |
| LOC643529 | 0          | 0        |
| LOC643536 | 0          | 0        |
| LOC643554 | 0          | 0        |
| LOC643562 | 0          | 0        |
| LOC643563 | 0          | 0        |
| LOC643576 | 0          | 0        |
| LOC643579 | 0          | 0        |
| LOC643582 | 0          | 0        |
| LOC643586 | 0          | 0        |
| LOC643596 | 0          | 0        |
| LOC643605 | 0          | 0        |
| LOC643630 | 0.22818189 | 0.62953  |
| LOC643634 | 0          | 0        |
| LOC643637 | 0          | 0        |
| LOC643654 | 0          | 0        |
| LOC643668 | 0          | 0        |
| LOC643669 | 0.01836273 | 0.062581 |
| LOC643677 | 0.0060435  | 0.012587 |
| LOC643689 | 0          | 0        |
| LOC643696 | 0          | 0        |
| LOC643699 | 1.69256701 | 1.853701 |
| LOC643707 | 0          | 0        |
| LOC643709 | 0          | 0        |
| LOC643711 | 0          | 0        |
| LOC643733 | 0          | 0        |
| LOC643739 | 0          | 0        |

|           |            |          |
|-----------|------------|----------|
| LOC643745 | 0          | 0        |
| LOC643749 | 0          | 0        |
| LOC643766 | 0          | 0        |
| LOC643768 | 0          | 0        |
| LOC643783 | 0.07806435 | 0        |
| LOC643784 | 0          | 0        |
| LOC643790 | 0          | 0        |
| LOC643797 | 0          | 0        |
| LOC643802 | 0.91756432 | 0.416947 |
| LOC643806 | 0          | 0        |
| LOC643810 | 0          | 0        |
| LOC643827 | 0.5296704  | 0.454954 |
| LOC643831 | 0          | 0        |
| LOC643837 | 0          | 0        |
| LOC643854 | 0          | 0.009269 |
| LOC643855 | 0          | 0        |
| LOC643856 | 0          | 0        |
| LOC643859 | 0          | 0        |
| LOC643860 | 0          | 0        |
| LOC643862 | 0          | 0        |
| LOC643870 | 0          | 0        |
| LOC643873 | 0          | 0        |
| LOC643875 | 0          | 0        |
| LOC643880 | 0          | 0        |
| LOC643884 | 0          | 0        |
| LOC643888 | 0          | 0        |
| LOC643896 | 0.04398605 | 0        |
| LOC643898 | 0          | 0        |
| LOC643909 | 0          | 0        |
| LOC643911 | 0          | 0        |
| LOC643916 | 0          | 0        |
| LOC643923 | 0          | 0        |
| LOC643926 | 0          | 0        |
| LOC643955 | 0          | 0        |
| LOC643972 | 0          | 0        |
| LOC643976 | 0          | 0        |
| LOC643988 | 0          | 0        |
| LOC643996 | 0          | 0        |
| LOC643997 | 0          | 0        |
| LOC644006 | 0          | 0        |
| LOC644016 | 0          | 0        |
| LOC644017 | 0          | 0        |
| LOC644021 | 0          | 0        |
| LOC644030 | 0          | 0        |
| LOC644035 | 0          | 0        |
| LOC644037 | 0          | 0        |
| LOC644050 | 0          | 0        |

|           |            |          |
|-----------|------------|----------|
| LOC644051 | 0          | 0        |
| LOC644058 | 0          | 0        |
| LOC644060 | 0          | 0        |
| LOC644063 | 0          | 0        |
| LOC644070 | 0          | 0        |
| LOC644079 | 0          | 0        |
| LOC644083 | 0          | 0        |
| LOC644090 | 0          | 0        |
| LOC644094 | 0          | 0        |
| LOC644096 | 8.09682853 | 8.06176  |
| LOC644100 | 0          | 0        |
| LOC644101 | 0          | 0        |
| LOC644110 | 0          | 0        |
| LOC644129 | 0          | 0.074062 |
| LOC644138 | 0          | 0        |
| LOC644145 | 0          | 0        |
| LOC644157 | 0          | 0        |
| LOC644158 | 0          | 0        |
| LOC644159 | 0          | 0        |
| LOC644160 | 0          | 0        |
| LOC644165 | 0          | 0        |
| LOC644169 | 0          | 0        |
| LOC644172 | 0          | 0        |
| LOC644173 | 0          | 0        |
| LOC644189 | 0          | 0        |
| LOC644193 | 0          | 0        |
| LOC644203 | 0          | 0        |
| LOC644213 | 0          | 0        |
| LOC644214 | 0          | 0        |
| LOC644231 | 20.450011  | 18.20101 |
| LOC644232 | 0          | 0        |
| LOC644233 | 0          | 0        |
| LOC644237 | 0          | 0        |
| LOC644248 | 0          | 0        |
| LOC644253 | 0          | 0.011877 |
| LOC644256 | 0          | 0        |
| LOC644261 | 0          | 0        |
| LOC644265 | 0.36502311 | 0.165869 |
| LOC644269 | 0          | 0        |
| LOC644277 | 0          | 0        |
| LOC644280 | 0.01801656 | 0        |
| LOC644295 | 0          | 0        |
| LOC644303 | 0          | 0        |
| LOC644310 | 0          | 0        |
| LOC644325 | 0          | 0        |
| LOC644330 | 0          | 0        |
| LOC644333 | 0          | 0        |

|           |            |          |
|-----------|------------|----------|
| LOC644334 | 0.03695137 | 0        |
| LOC644335 | 0          | 0        |
| LOC644354 | 1.02226948 | 0.982651 |
| LOC644357 | 0          | 0        |
| LOC644366 | 0          | 0        |
| LOC644383 | 0          | 0        |
| LOC644387 | 0          | 0        |
| LOC644390 | 0          | 0        |
| LOC644397 | 0          | 0        |
| LOC644403 | 0          | 0        |
| LOC644422 | 0          | 0        |
| LOC644425 | 0          | 0        |
| LOC644429 | 0          | 0        |
| LOC644435 | 0          | 0        |
| LOC644436 | 0          | 0        |
| LOC644442 | 0          | 0        |
| LOC644449 | 0          | 0        |
| LOC644451 | 0          | 0        |
| LOC644456 | 0          | 0        |
| LOC644459 | 0          | 0        |
| LOC644462 | 0          | 0        |
| LOC644482 | 0          | 0        |
| LOC644491 | 0          | 0        |
| LOC644495 | 0          | 0        |
| LOC644496 | 0          | 0        |
| LOC644502 | 0          | 0        |
| LOC644504 | 0.03831495 | 0.054408 |
| LOC644509 | 0          | 0        |
| LOC644517 | 0          | 0        |
| LOC644518 | 0          | 0        |
| LOC644525 | 0          | 0        |
| LOC644534 | 0          | 0        |
| LOC644538 | 0.2869462  | 0.118537 |
| LOC644548 | 0          | 0        |
| LOC644554 | 0          | 0        |
| LOC644563 | 0          | 0        |
| LOC644566 | 0          | 0        |
| LOC644573 | 0          | 0        |
| LOC644576 | 0          | 0        |
| LOC644578 | 0          | 0        |
| LOC644584 | 0          | 0        |
| LOC644587 | 0.11838587 | 0.053795 |
| LOC644588 | 0          | 0        |
| LOC644589 | 0          | 0        |
| LOC644600 | 0          | 0        |
| LOC644601 | 0          | 0        |
| LOC644604 | 0          | 0        |

|           |            |          |
|-----------|------------|----------|
| LOC644613 | 0.47588198 | 0.491463 |
| LOC644616 | 0          | 0        |
| LOC644618 | 0          | 0        |
| LOC644620 | 0.07250114 | 0        |
| LOC644623 | 0          | 0        |
| LOC644632 | 0          | 0        |
| LOC644634 | 0          | 0        |
| LOC644649 | 0          | 0        |
| LOC644651 | 0          | 0        |
| LOC644659 | 0          | 0        |
| LOC644661 | 0          | 0        |
| LOC644662 | 0          | 0        |
| LOC644667 | 0          | 0        |
| LOC644669 | 0          | 0        |
| LOC644672 | 0          | 0        |
| LOC644681 | 0          | 0        |
| LOC644682 | 0          | 0        |
| LOC644684 | 0.6361167  | 0.532471 |
| LOC644693 | 0          | 0        |
| LOC644704 | 0          | 0        |
| LOC644716 | 0          | 0        |
| LOC644717 | 0.00707209 | 0        |
| LOC644721 | 0          | 0        |
| LOC644728 | 0          | 0        |
| LOC644734 | 0          | 0        |
| LOC644743 | 0          | 0        |
| LOC644746 | 0          | 0        |
| LOC644754 | 0          | 0        |
| LOC644758 | 0          | 0        |
| LOC644759 | 0          | 0        |
| LOC644761 | 0          | 0        |
| LOC644768 | 0          | 0        |
| LOC644773 | 0          | 0        |
| LOC644776 | 0          | 0        |
| LOC644777 | 0          | 0        |
| LOC644791 | 0          | 0        |
| LOC644794 | 15.2481873 | 13.39977 |
| LOC644800 | 0          | 0        |
| LOC644844 | 0.04822324 | 0.109565 |
| LOC644850 | 0          | 0        |
| LOC644852 | 0          | 0        |
| LOC644871 | 0          | 0        |
| LOC644877 | 0          | 0        |
| LOC644881 | 0          | 0        |
| LOC644892 | 0          | 0        |
| LOC644893 | 0          | 0.010559 |
| LOC644899 | 0          | 0        |



|           |            |          |
|-----------|------------|----------|
| LOC644906 | 0          | 0        |
| LOC644909 | 0          | 0        |
| LOC644915 | 0          | 0        |
| LOC644924 | 0          | 0        |
| LOC644925 | 0          | 0        |
| LOC644936 | 0          | 0        |
| LOC644949 | 0          | 0        |
| LOC644950 | 0.09871047 | 0.112137 |
| LOC644962 | 0          | 0        |
| LOC644974 | 3.05941348 | 2.637468 |
| LOC644988 | 0          | 0        |
| LOC644990 | 0          | 0        |
| LOC644992 | 0.13477776 | 0        |
| LOC645001 | 0          | 0        |
| LOC645015 | 0          | 0        |
| LOC645053 | 0          | 0        |
| LOC645065 | 0          | 0        |
| LOC645084 | 0          | 0        |
| LOC645086 | 0          | 0        |
| LOC645094 | 0          | 0        |
| LOC645101 | 0          | 0        |
| LOC645108 | 0          | 0        |
| LOC645118 | 0          | 0        |
| LOC645120 | 0          | 0        |
| LOC645126 | 0          | 0        |
| LOC645129 | 0          | 0        |
| LOC645135 | 0          | 0        |
| LOC645136 | 0          | 0        |
| LOC645139 | 1.52683951 | 1.052082 |
| LOC645146 | 0.67823648 | 0.722332 |
| LOC645158 | 0          | 0        |
| LOC645163 | 0          | 0        |
| LOC645175 | 0          | 0        |
| LOC645177 | 0          | 0        |
| LOC645180 | 0          | 0        |
| LOC645181 | 0          | 0        |
| LOC645188 | 0          | 0        |
| LOC645195 | 0          | 0        |
| LOC645201 | 0          | 0        |
| LOC645202 | 0.0744589  | 0.06344  |
| LOC645204 | 0          | 0        |
| LOC645207 | 0          | 0        |
| LOC645212 | 1.93269059 | 1.380546 |
| LOC645220 | 0          | 0        |
| LOC645221 | 0          | 0        |
| LOC645225 | 0          | 0        |
| LOC645233 | 0          | 0        |

|           |            |          |
|-----------|------------|----------|
| LOC645249 | 0          | 0.017    |
| LOC645251 | 0          | 0        |
| LOC645262 | 0          | 0        |
| LOC645263 | 0          | 0        |
| LOC645264 | 0          | 0        |
| LOC645266 | 0          | 0        |
| LOC645269 | 0          | 0        |
| LOC645272 | 0          | 0        |
| LOC645277 | 0          | 0        |
| LOC645280 | 0          | 0        |
| LOC645294 | 0          | 0        |
| LOC645297 | 0          | 0        |
| LOC645307 | 0          | 0.006189 |
| LOC645311 | 0          | 0        |
| LOC645313 | 0          | 0        |
| LOC645314 | 0          | 0        |
| LOC645317 | 0.83594689 | 1.467639 |
| LOC645318 | 0          | 0        |
| LOC645319 | 0          | 0        |
| LOC645321 | 0.04031703 | 0        |
| LOC645323 | 0          | 0        |
| LOC645324 | 0          | 0        |
| LOC645328 | 0          | 0        |
| LOC645332 | 0          | 0        |
| LOC645339 | 0          | 0        |
| LOC645348 | 0          | 0        |
| LOC645354 | 0          | 0        |
| LOC645357 | 0          | 0        |
| LOC645359 | 0          | 0        |
| LOC645360 | 0          | 0        |
| LOC645368 | 0          | 0        |
| LOC645381 | 0          | 0        |
| LOC645382 | 0          | 0        |
| LOC645388 | 0          | 0        |
| LOC645395 | 0          | 0        |
| LOC645397 | 0          | 0        |
| LOC645398 | 0          | 0        |
| LOC645399 | 0          | 0        |
| LOC645405 | 0          | 0        |
| LOC645415 | 0          | 0        |
| LOC645431 | 0          | 0        |
| LOC645433 | 0          | 0        |
| LOC645436 | 0          | 0        |
| LOC645440 | 0          | 0        |
| LOC645446 | 0.06950523 | 0.078959 |
| LOC645453 | 0          | 0        |
| LOC645470 | 0          | 0        |

|           |            |          |
|-----------|------------|----------|
| LOC645474 | 0          | 0        |
| LOC645479 | 0          | 0        |
| LOC645481 | 0          | 0        |
| LOC645482 | 0          | 0        |
| LOC645486 | 0          | 0        |
| LOC645489 | 0.0133156  | 0        |
| LOC645490 | 0.1583016  | 0.359666 |
| LOC645503 | 0          | 0        |
| LOC645506 | 0          | 0        |
| LOC645513 | 0          | 0        |
| LOC645529 | 0.01607441 | 0        |
| LOC645544 | 0          | 0        |
| LOC645545 | 0          | 0        |
| LOC645551 | 0          | 0        |
| LOC645571 | 0          | 0        |
| LOC645579 | 0          | 0        |
| LOC645586 | 0          | 0        |
| LOC645598 | 0          | 0        |
| LOC645602 | 0.04191096 | 0.031741 |
| LOC645605 | 0          | 0        |
| LOC645626 | 0          | 0        |
| LOC645634 | 0.04247542 | 0.032168 |
| LOC645641 | 0          | 0        |
| LOC645646 | 0          | 0        |
| LOC645652 | 0          | 0        |
| LOC645676 | 0          | 0        |
| LOC645680 | 0          | 0        |
| LOC645685 | 0.76455749 | 0.253327 |
| LOC645691 | 0          | 0        |
| LOC645693 | 0          | 0        |
| LOC645700 | 0          | 0        |
| LOC645705 | 0          | 0        |
| LOC645715 | 0          | 0        |
| LOC645726 | 0          | 0        |
| LOC645739 | 0          | 0        |
| LOC645744 | 0          | 0        |
| LOC645749 | 0          | 0        |
| LOC645752 | 0          | 0        |
| LOC645754 | 0          | 0        |
| LOC645763 | 0          | 0        |
| LOC645769 | 0          | 0        |
| LOC645771 | 0          | 0        |
| LOC645773 | 0          | 0        |
| LOC645781 | 0.05856638 | 0        |
| LOC645805 | 0          | 0        |
| LOC645822 | 0          | 0        |
| LOC645841 | 0          | 0        |

|           |            |          |
|-----------|------------|----------|
| LOC645851 | 0          | 0        |
| LOC645852 | 0          | 0        |
| LOC645853 | 0          | 0        |
| LOC645862 | 0          | 0        |
| LOC645874 | 0          | 0        |
| LOC645877 | 0          | 0        |
| LOC645900 | 0          | 0        |
| LOC645930 | 0          | 0        |
| LOC645931 | 0          | 0        |
| LOC645937 | 1.16294631 | 1.069483 |
| LOC645938 | 0          | 0        |
| LOC645939 | 0          | 0        |
| LOC645940 | 0          | 0        |
| LOC645944 | 0          | 0        |
| LOC645954 | 0          | 0        |
| LOC645955 | 0          | 0        |
| LOC645960 | 0          | 0.035074 |
| LOC645961 | 0          | 0        |
| LOC645964 | 0          | 0        |
| LOC645965 | 0          | 0        |
| LOC645967 | 0          | 0        |
| LOC645969 | 0.01170024 | 0.026583 |
| LOC645971 | 0          | 0        |
| LOC645973 | 0          | 0        |
| LOC645978 | 0          | 0        |
| LOC646012 | 0          | 0        |
| LOC646016 | 0          | 0        |
| LOC646021 | 0.11085412 | 0.293841 |
| LOC646030 | 0          | 0        |
| LOC646034 | 0.05620077 | 0.078033 |
| LOC646044 | 0          | 0        |
| LOC646048 | 0.03698387 | 0.084029 |
| LOC646049 | 0          | 0        |
| LOC646050 | 0          | 0        |
| LOC646053 | 0          | 0        |
| LOC646057 | 0.03850793 | 0.087491 |
| LOC646058 | 0          | 0        |
| LOC646065 | 0          | 0        |
| LOC646066 | 0          | 0        |
| LOC646070 | 0          | 0        |
| LOC646071 | 0          | 0        |
| LOC646079 | 0          | 0        |
| LOC646080 | 0          | 0        |
| LOC646085 | 0          | 0        |
| LOC646086 | 0          | 0        |
| LOC646087 | 0          | 0        |
| LOC646090 | 0          | 0        |

|           |            |          |
|-----------|------------|----------|
| LOC646091 | 0          | 0        |
| LOC646096 | 0          | 0        |
| LOC646103 | 0          | 0        |
| LOC646112 | 0          | 0        |
| LOC646114 | 0          | 0        |
| LOC646120 | 0          | 0        |
| LOC646127 | 0          | 0        |
| LOC646139 | 0          | 0        |
| LOC646140 | 0          | 0        |
| LOC646160 | 0          | 0        |
| LOC646164 | 0          | 0        |
| LOC646171 | 0          | 0        |
| LOC646177 | 0          | 0        |
| LOC646193 | 0          | 0        |
| LOC646196 | 0          | 0        |
| LOC646197 | 0          | 0        |
| LOC646201 | 0          | 0        |
| LOC646203 | 0          | 0        |
| LOC646208 | 0          | 0        |
| LOC646213 | 0          | 0        |
| LOC646214 | 0          | 0        |
| LOC646216 | 0          | 0        |
| LOC646218 | 0          | 0        |
| LOC646227 | 0.01563222 | 0.005919 |
| LOC646249 | 0          | 0        |
| LOC646262 | 0          | 0        |
| LOC646270 | 0          | 0        |
| LOC646272 | 0          | 0        |
| LOC646273 | 0          | 0        |
| LOC646274 | 0          | 0        |
| LOC646278 | 0          | 0        |
| LOC646300 | 0          | 0        |
| LOC646316 | 0          | 0        |
| LOC646324 | 0          | 0        |
| LOC646344 | 0.9482012  | 1.498674 |
| LOC646347 | 0          | 0        |
| LOC646348 | 0          | 0        |
| LOC646358 | 0          | 0        |
| LOC646359 | 0.00745051 | 0        |
| LOC646360 | 0          | 0        |
| LOC646377 | 0          | 0        |
| LOC646382 | 0          | 0        |
| LOC646388 | 0          | 0        |
| LOC646392 | 0          | 0        |
| LOC646396 | 0.30569948 | 0.270106 |
| LOC646405 | 0          | 0        |
| LOC646408 | 0          | 0        |

|           |            |          |
|-----------|------------|----------|
| LOC646430 | 0          | 0        |
| LOC646440 | 0          | 0        |
| LOC646442 | 0          | 0        |
| LOC646467 | 0          | 0        |
| LOC646471 | 0          | 0        |
| LOC646479 | 0          | 0        |
| LOC646482 | 0          | 0        |
| LOC646484 | 0          | 0        |
| LOC646498 | 0          | 0        |
| LOC646505 | 0          | 0        |
| LOC646506 | 0          | 0        |
| LOC646507 | 0          | 0        |
| LOC646508 | 0          | 0        |
| LOC646509 | 0.24143921 | 0.217137 |
| LOC646513 | 0          | 0        |
| LOC646517 | 0          | 0        |
| LOC646520 | 0          | 0        |
| LOC646526 | 0          | 0        |
| LOC646535 | 0          | 0        |
| LOC646543 | 0.13449039 | 0.101855 |
| LOC646548 | 0          | 0        |
| LOC646555 | 0          | 0        |
| LOC646556 | 0          | 0        |
| LOC646557 | 0          | 0        |
| LOC646567 | 0.14206305 | 0.107591 |
| LOC646572 | 0          | 0        |
| LOC646575 | 0          | 0        |
| LOC646576 | 0          | 0        |
| LOC646577 | 0          | 0        |
| LOC646581 | 0          | 0        |
| LOC646595 | 0          | 0        |
| LOC646597 | 0          | 0        |
| LOC646603 | 0          | 0        |
| LOC646609 | 0          | 0        |
| LOC646612 | 0          | 0        |
| LOC646614 | 0          | 0        |
| LOC646616 | 0          | 0        |
| LOC646619 | 0          | 0        |
| LOC646626 | 0.02810873 | 0        |
| LOC646629 | 0.82452278 | 0.325799 |
| LOC646630 | 0          | 0        |
| LOC646639 | 0          | 0        |
| LOC646640 | 0          | 0        |
| LOC646641 | 0          | 0        |
| LOC646644 | 0          | 0        |
| LOC646663 | 0          | 0        |
| LOC646665 | 0          | 0        |

|           |            |          |
|-----------|------------|----------|
| LOC646666 | 0          | 0        |
| LOC646670 | 0.23195795 | 0.150576 |
| LOC646674 | 0          | 0        |
| LOC646693 | 0          | 0        |
| LOC646696 | 0          | 0        |
| LOC646698 | 0          | 0.063949 |
| LOC646700 | 0          | 0        |
| LOC646701 | 0          | 0        |
| LOC646709 | 0          | 0        |
| LOC646719 | 0          | 0        |
| LOC646721 | 0          | 0        |
| LOC646730 | 0          | 0        |
| LOC646743 | 0          | 0        |
| LOC646745 | 0          | 0        |
| LOC646754 | 0.0152027  | 0        |
| LOC646755 | 0          | 0        |
| LOC646756 | 0          | 0        |
| LOC646758 | 0          | 0        |
| LOC646762 | 0          | 0        |
| LOC646770 | 0          | 0        |
| LOC646791 | 0          | 0        |
| LOC646794 | 0          | 0        |
| LOC646797 | 0          | 0        |
| LOC646799 | 0.01906195 | 0.021655 |
| LOC646801 | 0          | 0        |
| LOC646802 | 0          | 0        |
| LOC646804 | 0          | 0        |
| LOC646808 | 0          | 0        |
| LOC646810 | 0          | 0        |
| LOC646813 | 0          | 0        |
| LOC646817 | 0.12379979 | 0.117199 |
| LOC646828 | 0          | 0        |
| LOC646836 | 1.71136415 | 3.14765  |
| LOC646837 | 0          | 0        |
| LOC646839 | 0          | 0        |
| LOC646849 | 0          | 0        |
| LOC646851 | 0.00845409 | 0.019208 |
| LOC646853 | 0          | 0        |
| LOC646862 | 0          | 0        |
| LOC646864 | 0.02498554 | 0.014192 |
| LOC646870 | 0          | 0        |
| LOC646873 | 0          | 0        |
| LOC646877 | 0          | 0        |
| LOC646879 | 0          | 0        |
| LOC646890 | 0          | 0        |
| LOC646891 | 0          | 0        |
| LOC646908 | 0          | 0        |

|           |            |          |
|-----------|------------|----------|
| LOC646910 | 0          | 0        |
| LOC646913 | 0          | 0        |
| LOC646927 | 0          | 0        |
| LOC646929 | 0          | 0        |
| LOC646934 | 0          | 0        |
| LOC646936 | 0          | 0        |
| LOC646938 | 0.04703653 | 0.267171 |
| LOC646954 | 0          | 0        |
| LOC646956 | 0          | 0        |
| LOC646960 | 0          | 0        |
| LOC646970 | 0          | 0        |
| LOC646976 | 0          | 0        |
| LOC646981 | 0          | 0        |
| LOC646982 | 0          | 0        |
| LOC646993 | 1.03952992 | 0.876168 |
| LOC646995 | 0          | 0        |
| LOC646999 | 0          | 0        |
| LOC647001 | 0          | 0        |
| LOC647002 | 0          | 0        |
| LOC647009 | 0          | 0        |
| LOC647012 | 0          | 0        |
| LOC647013 | 0          | 0.01843  |
| LOC647016 | 0          | 0        |
| LOC647020 | 0          | 0.017653 |
| LOC647030 | 0          | 0        |
| LOC647042 | 0.40485233 | 0.843184 |
| LOC647051 | 0          | 0        |
| LOC647055 | 0.00907829 | 0.020626 |
| LOC647057 | 0          | 0        |
| LOC647069 | 0          | 0        |
| LOC647070 | 0          | 0        |
| LOC647077 | 0          | 0        |
| LOC647081 | 0          | 0        |
| LOC647085 | 0          | 0        |
| LOC647086 | 0          | 0        |
| LOC647102 | 0          | 0        |
| LOC647121 | 0          | 0        |
| LOC647123 | 0          | 0        |
| LOC647132 | 0          | 0        |
| LOC647144 | 0          | 0        |
| LOC647145 | 0          | 0        |
| LOC647150 | 0          | 0        |
| LOC647156 | 0          | 0        |
| LOC647157 | 0          | 0        |
| LOC647163 | 0.03274974 | 0        |
| LOC647166 | 0          | 0        |
| LOC647169 | 0          | 0        |



|           |            |          |
|-----------|------------|----------|
| LOC647175 | 0          | 0        |
| LOC647177 | 0          | 0        |
| LOC647188 | 0.11680739 | 0        |
| LOC647208 | 0          | 0        |
| LOC647209 | 0          | 0        |
| LOC647211 | 0          | 0        |
| LOC647224 | 0          | 0        |
| LOC647249 | 0          | 0        |
| LOC647253 | 0          | 0        |
| LOC647259 | 0          | 0        |
| LOC647262 | 0          | 0        |
| LOC647264 | 0          | 0        |
| LOC647265 | 0          | 0        |
| LOC647275 | 0          | 0        |
| LOC647280 | 0          | 0        |
| LOC647281 | 0          | 0        |
| LOC647288 | 0          | 0        |
| LOC647298 | 0          | 0        |
| LOC647299 | 0          | 0        |
| LOC647302 | 0          | 0        |
| LOC647305 | 0          | 0        |
| LOC647307 | 0          | 0        |
| LOC647309 | 0          | 0        |
| LOC647310 | 0.11344603 | 0.085918 |
| LOC647317 | 0          | 0        |
| LOC647415 | 0          | 0        |
| LOC647481 | 0          | 0        |
| LOC647503 | 0          | 0        |
| LOC647507 | 0          | 0        |
| LOC647532 | 0          | 0        |
| LOC647569 | 0          | 0        |
| LOC647589 | 0          | 0        |
| LOC647633 | 0          | 0        |
| LOC647696 | 0          | 0        |
| LOC647859 | 0          | 0        |
| LOC647946 | 0          | 0        |
| LOC647979 | 0          | 0        |
| LOC647996 | 0          | 0        |
| LOC648044 | 0          | 0        |
| LOC648237 | 0          | 0        |
| LOC648262 | 0          | 0        |
| LOC648283 | 0          | 0        |
| LOC648442 | 0          | 0        |
| LOC648532 | 0          | 0        |
| LOC648630 | 0          | 0        |
| LOC648665 | 0          | 0        |
| LOC648708 | 0          | 0        |

|           |            |          |
|-----------|------------|----------|
| LOC648740 | 0          | 0        |
| LOC648761 | 0          | 0        |
| LOC648774 | 0          | 0        |
| LOC648809 | 0          | 0.11497  |
| LOC648822 | 0.19797863 | 0.089963 |
| LOC648890 | 0          | 0        |
| LOC648927 | 0          | 0        |
| LOC648934 | 0          | 0        |
| LOC648947 | 0          | 0        |
| LOC648980 | 0          | 0        |
| LOC648987 | 0          | 0        |
| LOC649024 | 0          | 0        |
| LOC649166 | 0          | 0        |
| LOC649201 | 0          | 0        |
| LOC649238 | 0.01709377 | 0.019419 |
| LOC649264 | 0          | 0        |
| LOC649288 | 0          | 0        |
| LOC649324 | 0          | 0        |
| LOC649395 | 0          | 0        |
| LOC649458 | 0          | 0        |
| LOC649489 | 0          | 0        |
| LOC649671 | 0          | 0        |
| LOC649704 | 0          | 0        |
| LOC649873 | 0          | 0        |
| LOC649925 | 0          | 0        |
| LOC650024 | 0          | 0        |
| LOC650095 | 0          | 0        |
| LOC650137 | 0          | 0.03492  |
| LOC650157 | 0          | 0.029164 |
| LOC650172 | 0          | 0        |
| LOC650177 | 1.0782221  | 1.10239  |
| LOC650181 | 0          | 0        |
| LOC650226 | 0          | 0        |
| LOC650236 | 0          | 0        |
| LOC650293 | 0          | 0        |
| LOC650368 | 0          | 0        |
| LOC650474 | 0          | 0        |
| LOC650531 | 0          | 0        |
| LOC650560 | 0          | 0        |
| LOC650623 | 0          | 0        |
| LOC650794 | 0.09269066 | 0.035099 |
| LOC650866 | 0          | 0        |
| LOC651118 | 0          | 0        |
| LOC651144 | 0          | 0        |
| LOC651250 | 0          | 0        |
| LOC651258 | 0          | 0        |
| LOC651628 | 0          | 0        |

|           |            |          |
|-----------|------------|----------|
| LOC651644 | 0          | 0        |
| LOC651714 | 0          | 0        |
| LOC651815 | 0          | 0        |
| LOC651856 | 0.40351645 | 0.458401 |
| LOC651868 | 0          | 0        |
| LOC652170 | 0          | 0        |
| LOC652191 | 0          | 0        |
| LOC652276 | 0          | 0        |
| LOC652423 | 0          | 0        |
| LOC652489 | 0          | 0        |
| LOC652549 | 0          | 0        |
| LOC652904 | 0.02602145 | 0        |
| LOC652959 | 0          | 0        |
| LOC652960 | 0          | 0        |
| LOC652961 | 0          | 0        |
| LOC652964 | 0          | 0        |
| LOC652990 | 0          | 0        |
| LOC653052 | 6.92793553 | 4.866555 |
| LOC653056 | 0          | 0        |
| LOC653061 | 0.02509988 | 0.038018 |
| LOC653073 | 0.10460364 | 0.220687 |
| LOC653075 | 0          | 0        |
| LOC653080 | 0          | 0        |
| LOC653097 | 0          | 0        |
| LOC653110 | 0          | 0        |
| LOC653111 | 0          | 0        |
| LOC653113 | 0          | 0        |
| LOC653115 | 0          | 0        |
| LOC653125 | 0.88428685 | 1.239675 |
| LOC653135 | 0          | 0        |
| LOC653155 | 0.06257539 | 0        |
| LOC653166 | 0          | 0        |
| LOC653175 | 0          | 0        |
| LOC653188 | 0          | 0        |
| LOC653192 | 0          | 0        |
| LOC653194 | 0          | 0        |
| LOC653198 | 0          | 0        |
| LOC653203 | 0          | 0        |
| LOC653264 | 0          | 0        |
| LOC653269 | 0.02108331 | 0.023951 |
| LOC653303 | 0          | 0        |
| LOC653340 | 0          | 0        |
| LOC653354 | 0.0873145  | 0.059514 |
| LOC653375 | 0.02401523 | 0.013641 |
| LOC653390 | 0          | 0        |
| LOC653406 | 0          | 0        |
| LOC653435 | 0          | 0        |

|           |            |          |
|-----------|------------|----------|
| LOC653436 | 0          | 0        |
| LOC653447 | 0          | 0        |
| LOC653453 | 0          | 0        |
| LOC653458 | 0          | 0        |
| LOC653486 | 0.17618992 | 0        |
| LOC653501 | 0          | 0        |
| LOC653503 | 0          | 0        |
| LOC653510 | 0.44693402 | 0.507724 |
| LOC653513 | 0          | 0        |
| LOC653543 | 0          | 0        |
| LOC653544 | 0          | 0        |
| LOC653545 | 0          | 0        |
| LOC653548 | 0          | 0        |
| LOC653550 | 0.01096211 | 0.012453 |
| LOC653557 | 0          | 0        |
| LOC653562 | 0          | 0        |
| LOC653566 | 0          | 0        |
| LOC653588 | 0          | 0        |
| LOC653593 | 0          | 0        |
| LOC653653 | 0          | 0        |
| LOC653698 | 0          | 0        |
| LOC653707 | 0          | 0        |
| LOC653712 | 0.02727    | 0.2169   |
| LOC653720 | 0.33911824 | 0.108658 |
| LOC653753 | 0          | 0        |
| LOC653758 | 0          | 0        |
| LOC653781 | 0.04491221 | 0.014577 |
| LOC653786 | 0          | 0        |
| LOC653794 | 0          | 0        |
| LOC653895 | 0          | 0        |
| LOC653924 | 0          | 0.053795 |
| LOC654254 | 0.31638665 | 0.228722 |
| LOC654337 | 0          | 0        |
| LOC654338 | 0          | 0        |
| LOC654340 | 0          | 0        |
| LOC654342 | 0          | 0        |
| LOC654433 | 0          | 0        |
| LOC654480 | 0          | 0        |
| LOC654780 | 0          | 0        |
| LOC65998  | 1.26935445 | 1.887018 |
| LOC677762 | 0          | 0        |
| LOC678655 | 0          | 0        |
| LOC692231 | 0          | 0        |
| LOC692246 | 0          | 0        |
| LOC723805 | 0.03650231 | 0.082934 |
| LOC723972 | 0          | 0        |

|           |            |          |
|-----------|------------|----------|
| LOC724034 | 0          | 0        |
| LOC724059 | 0          | 0        |
| LOC724060 | 0          | 0        |
| LOC724065 | 0          | 0        |
| LOC724084 | 0          | 0        |
| LOC724085 | 0          | 0        |
| LOC724101 | 0          | 0        |
| LOC724104 | 0          | 0        |
| LOC724105 | 0          | 0        |
| LOC727677 | 0          | 0        |
| LOC727681 | 0          | 0        |
| LOC727709 | 0          | 0        |
| LOC727713 | 0          | 0        |
| LOC727721 | 0          | 0        |
| LOC727751 | 0.31066452 | 0.315107 |
| LOC727758 | 0.10226328 | 0.092938 |
| LOC727770 | 0          | 0        |
| LOC727788 | 0.3219129  | 0.143411 |
| LOC727796 | 0          | 0        |
| LOC727803 | 0          | 0        |
| LOC727804 | 0.2857812  | 0.371031 |
| LOC727805 | 0          | 0        |
| LOC727808 | 0          | 0        |
| LOC727818 | 0          | 0        |
| LOC727828 | 0          | 0        |
| LOC727832 | 0.03597588 | 0.040869 |
| LOC727836 | 0          | 0        |
| LOC727838 | 0          | 0        |
| LOC727842 | 0          | 0        |
| LOC727847 | 0          | 0        |
| LOC727849 | 0          | 0        |
| LOC727856 | 0          | 0        |
| LOC727858 | 0.0651836  | 0.148099 |
| LOC727863 | 0          | 0        |
| LOC727869 | 0.14662016 | 0.13325  |
| LOC727874 | 0          | 0        |
| LOC727878 | 0.04473475 | 0        |
| LOC727879 | 0          | 0        |
| LOC727880 | 0          | 0        |
| LOC727884 | 0          | 0        |
| LOC727894 | 0          | 0        |
| LOC727896 | 0          | 0        |
| LOC727900 | 14.2408875 | 17.50599 |
| LOC727909 | 2.58765514 | 2.485156 |
| LOC727914 | 0          | 0        |
| LOC727916 | 0          | 0        |
| LOC727918 | 0.10391432 | 0.098374 |

|           |            |          |
|-----------|------------|----------|
| LOC727919 | 0          | 0        |
| LOC727924 | 0          | 0        |
| LOC727930 | 0          | 0        |
| LOC727934 | 0.11953002 | 0.149367 |
| LOC727938 | 0          | 0        |
| LOC727941 | 0          | 0        |
| LOC727944 | 0          | 0        |
| LOC727947 | 0          | 0.142173 |
| LOC727962 | 0          | 0        |
| LOC727963 | 0          | 0.087278 |
| LOC727964 | 0          | 0        |
| LOC727967 | 0.16812353 | 0.056174 |
| LOC727978 | 0.10893954 | 0.265194 |
| LOC727980 | 0          | 0        |
| LOC727983 | 0          | 0        |
| LOC727987 | 0          | 0        |
| LOC727991 | 0          | 0        |
| LOC727996 | 0.03295506 | 0.112312 |
| LOC728003 | 0          | 0        |
| LOC728015 | 0          | 0        |
| LOC728019 | 0          | 0        |
| LOC728022 | 0          | 0        |
| LOC728023 | 0          | 0        |
| LOC728024 | 0          | 0        |
| LOC728026 | 0.03770233 | 0.057107 |
| LOC728027 | 0          | 0        |
| LOC728031 | 0          | 0        |
| LOC728034 | 0.16173332 | 0.091866 |
| LOC728046 | 0.71145376 | 0.680609 |
| LOC728047 | 0.06583076 | 0.874407 |
| LOC728048 | 0          | 0        |
| LOC728054 | 0          | 0        |
| LOC728056 | 0          | 0.008752 |
| LOC728064 | 0          | 0        |
| LOC728065 | 0.02315565 | 0        |
| LOC728066 | 0          | 0        |
| LOC728080 | 4.38934793 | 2.67435  |
| LOC728093 | 0          | 0        |
| LOC728095 | 0          | 0        |
| LOC728098 | 0          | 0        |
| LOC728111 | 0          | 0        |
| LOC728114 | 0          | 0        |
| LOC728115 | 0          | 0        |
| LOC728121 | 0          | 0        |
| LOC728129 | 0          | 0        |
| LOC728142 | 0          | 0        |
| LOC728145 | 0          | 0        |

|           |            |          |
|-----------|------------|----------|
| LOC728147 | 0          | 0        |
| LOC728148 | 0          | 0        |
| LOC728152 | 0          | 0        |
| LOC728162 | 0          | 0        |
| LOC728167 | 0          | 0        |
| LOC728170 | 0          | 0        |
| LOC728175 | 0.07455791 | 0.084699 |
| LOC728178 | 0          | 0        |
| LOC728190 | 0          | 0        |
| LOC728192 | 0          | 0        |
| LOC728195 | 0          | 0        |
| LOC728196 | 0          | 0        |
| LOC728199 | 0          | 0        |
| LOC728210 | 0          | 0        |
| LOC728211 | 0          | 0        |
| LOC728216 | 0          | 0.074875 |
| LOC728232 | 0          | 0        |
| LOC728243 | 0          | 0        |
| LOC728247 | 0          | 0        |
| LOC728248 | 0          | 0        |
| LOC728253 | 0.03295506 | 0        |
| LOC728254 | 0          | 0        |
| LOC728263 | 0          | 0        |
| LOC728264 | 0          | 0        |
| LOC728276 | 0          | 0        |
| LOC728278 | 0          | 0        |
| LOC728288 | 0          | 0        |
| LOC728290 | 0          | 0        |
| LOC728297 | 0          | 0.028435 |
| LOC728307 | 0          | 0.008229 |
| LOC728310 | 0          | 0        |
| LOC728316 | 0          | 0        |
| LOC728317 | 0          | 0        |
| LOC728318 | 0          | 0        |
| LOC728323 | 0          | 0        |
| LOC728324 | 0          | 0        |
| LOC728325 | 0          | 0        |
| LOC728333 | 0          | 0        |
| LOC728344 | 0          | 0        |
| LOC728350 | 0          | 0        |
| LOC728351 | 5.71515505 | 5.303738 |
| LOC728353 | 0          | 0        |
| LOC728358 | 0.46441494 | 0.23981  |
| LOC728361 | 0          | 0.042805 |
| LOC728366 | 0          | 0        |
| LOC728369 | 0          | 0        |
| LOC728373 | 0          | 0        |

|           |            |          |
|-----------|------------|----------|
| LOC728376 | 0          | 0        |
| LOC728377 | 0          | 0        |
| LOC728379 | 0          | 0        |
| LOC728381 | 0          | 0        |
| LOC728384 | 0          | 0.105453 |
| LOC728393 | 0          | 0        |
| LOC728400 | 0          | 0        |
| LOC728402 | 0          | 0        |
| LOC728405 | 0          | 0        |
| LOC728406 | 0          | 0        |
| LOC728407 | 0          | 0        |
| LOC728410 | 0          | 0        |
| LOC728411 | 0          | 0        |
| LOC728416 | 0          | 0.122488 |
| LOC728417 | 0.62553487 | 0.451451 |
| LOC728419 | 0          | 0        |
| LOC728424 | 0          | 0        |
| LOC728429 | 0          | 0        |
| LOC728431 | 0.42475416 | 0.41819  |
| LOC728432 | 0          | 0        |
| LOC728433 | 0          | 0        |
| LOC728438 | 0          | 0.112312 |
| LOC728448 | 0          | 0        |
| LOC728449 | 0          | 0        |
| LOC728450 | 0          | 0        |
| LOC728452 | 0          | 0        |
| LOC728460 | 0.03073879 | 0.03492  |
| LOC728463 | 0          | 0        |
| LOC728467 | 0          | 0        |
| LOC728468 | 0          | 0        |
| LOC728470 | 0.05768266 | 0.032764 |
| LOC728474 | 0          | 0        |
| LOC728475 | 0.15729674 | 0.119128 |
| LOC728477 | 0.03321537 | 0.037733 |
| LOC728485 | 0          | 0        |
| LOC728488 | 0          | 0        |
| LOC728493 | 0          | 0        |
| LOC728498 | 2.29651017 | 2.950811 |
| LOC728499 | 0          | 0        |
| LOC728503 | 0.01287528 | 0.014627 |
| LOC728506 | 0          | 0        |
| LOC728510 | 0          | 0        |
| LOC728519 | 0          | 0        |
| LOC728524 | 0          | 0        |
| LOC728526 | 0          | 0        |
| LOC728528 | 0.06519482 | 0        |
| LOC728530 | 0.04151102 | 0.070736 |



|           |            |          |
|-----------|------------|----------|
| LOC728531 | 0.03025227 | 0.034367 |
| LOC728532 | 0          | 0        |
| LOC728533 | 0          | 0        |
| LOC728534 | 10.9905139 | 11.91398 |
| LOC728535 | 0          | 0        |
| LOC728537 | 0          | 0        |
| LOC728540 | 0          | 0        |
| LOC728554 | 0          | 0        |
| LOC728558 | 0.16686771 | 0.151651 |
| LOC728565 | 0          | 0        |
| LOC728566 | 0          | 0        |
| LOC728573 | 0          | 0        |
| LOC728575 | 0          | 0        |
| LOC728586 | 0          | 0        |
| LOC728587 | 0          | 0        |
| LOC728588 | 0          | 0        |
| LOC728589 | 0          | 0        |
| LOC728597 | 0          | 0.031161 |
| LOC728601 | 0          | 0        |
| LOC728602 | 0          | 0        |
| LOC728606 | 0          | 0        |
| LOC728611 | 0          | 0        |
| LOC728613 | 0          | 0        |
| LOC728614 | 0          | 0        |
| LOC728615 | 0          | 0        |
| LOC728619 | 0          | 0        |
| LOC728621 | 0.07465418 | 0.053969 |
| LOC728622 | 0.12441024 | 0.141332 |
| LOC728627 | 0          | 0        |
| LOC728633 | 0          | 0        |
| LOC728636 | 0.0825494  | 0.056266 |
| LOC728637 | 0.07554011 | 0.028605 |
| LOC728638 | 0          | 0        |
| LOC728643 | 0          | 0        |
| LOC728648 | 0          | 0        |
| LOC728650 | 0.00893554 | 0        |
| LOC728657 | 0          | 0        |
| LOC728660 | 0          | 0        |
| LOC728661 | 16.4966365 | 15.79608 |
| LOC728664 | 0          | 0        |
| LOC728666 | 0          | 0        |
| LOC728667 | 0          | 0        |
| LOC728671 | 0          | 0.027936 |
| LOC728675 | 0          | 0        |
| LOC728682 | 0          | 0        |
| LOC728683 | 0.02503016 | 0        |
| LOC728688 | 0          | 0        |

|           |            |          |
|-----------|------------|----------|
| LOC728694 | 0          | 0.041181 |
| LOC728698 | 0          | 0        |
| LOC728701 | 0.30438817 | 0.179298 |
| LOC728715 | 0.53748966 | 0.359175 |
| LOC728716 | 0          | 0        |
| LOC728723 | 0          | 0        |
| LOC728725 | 0          | 0        |
| LOC728728 | 0          | 0        |
| LOC728730 | 0          | 0        |
| LOC728731 | 0          | 0        |
| LOC728732 | 0          | 0        |
| LOC728734 | 0.23910536 | 0.470821 |
| LOC728737 | 0          | 0        |
| LOC728739 | 0          | 0        |
| LOC728741 | 1.09723166 | 0.926432 |
| LOC728743 | 0          | 0        |
| LOC728744 | 0          | 0.030253 |
| LOC728748 | 0          | 0        |
| LOC728752 | 0.67197436 | 0.407133 |
| LOC728755 | 0          | 0        |
| LOC728758 | 0          | 0        |
| LOC728763 | 0          | 0        |
| LOC728767 | 1.63078784 | 1.531172 |
| LOC728769 | 0          | 0        |
| LOC728776 | 0          | 0        |
| LOC728783 | 0          | 0        |
| LOC728789 | 0.01787108 | 0        |
| LOC728792 | 0.0376798  | 0        |
| LOC728800 | 0.04196673 | 0        |
| LOC728804 | 2.13285562 | 1.915012 |
| LOC728806 | 0.25230397 | 0.298564 |
| LOC728807 | 0          | 0        |
| LOC728809 | 0.01901884 | 0.010803 |
| LOC728811 | 0          | 0        |
| LOC728813 | 0          | 0        |
| LOC728815 | 0          | 0        |
| LOC728816 | 0          | 0        |
| LOC728819 | 0          | 0        |
| LOC728825 | 0          | 0        |
| LOC728832 | 0          | 0        |
| LOC728836 | 0.95936909 | 0.883359 |
| LOC728846 | 0.76257677 | 0.990056 |
| LOC728847 | 0          | 0        |
| LOC728851 | 0          | 0        |
| LOC728853 | 0          | 0        |
| LOC728855 | 0          | 0        |
| LOC728873 | 0          | 0        |

|           |            |          |
|-----------|------------|----------|
| LOC728875 | 0          | 0        |
| LOC728887 | 0          | 0        |
| LOC728888 | 16.9340893 | 18.14561 |
| LOC728905 | 0.00893554 | 0.010151 |
| LOC728913 | 0          | 0        |
| LOC728914 | 0          | 0        |
| LOC728920 | 0          | 0        |
| LOC728921 | 0          | 0        |
| LOC728927 | 4.327137   | 3.363371 |
| LOC728931 | 0.07919145 | 0.022491 |
| LOC728940 | 0          | 0.038034 |
| LOC728947 | 0          | 0        |
| LOC728975 | 0          | 0        |
| LOC728989 | 0          | 0        |
| LOC728991 | 0          | 0        |
| LOC728996 | 0          | 0        |
| LOC729008 | 0.21464375 | 0.343591 |
| LOC729009 | 0          | 0        |
| LOC729012 | 0          | 0.03012  |
| LOC729020 | 0          | 0.011214 |
| LOC729023 | 0          | 0        |
| LOC729032 | 0          | 0        |
| LOC729033 | 0          | 0        |
| LOC729040 | 0          | 0        |
| LOC729041 | 0.15299097 | 0.074486 |
| LOC729046 | 0          | 0        |
| LOC729047 | 0          | 0        |
| LOC729051 | 0          | 0        |
| LOC729056 | 0          | 0        |
| LOC729057 | 0          | 0        |
| LOC729059 | 0          | 0        |
| LOC729061 | 0          | 0        |
| LOC729065 | 0          | 0        |
| LOC729069 | 0          | 0        |
| LOC729076 | 0          | 0        |
| LOC729078 | 0          | 0        |
| LOC729080 | 0          | 0        |
| LOC729081 | 0          | 0        |
| LOC729082 | 0          | 0        |
| LOC729085 | 0.03062239 | 0.034788 |
| LOC729086 | 0.42193691 | 0.690556 |
| LOC729088 | 0          | 0        |
| LOC729101 | 0          | 0        |
| LOC729102 | 0          | 0        |
| LOC729119 | 0          | 0        |
| LOC729121 | 0          | 0        |
| LOC729126 | 0          | 0        |

|           |            |          |
|-----------|------------|----------|
| LOC729127 | 0          | 0        |
| LOC729130 | 3.23174165 | 2.807472 |
| LOC729141 | 0          | 0        |
| LOC729148 | 0          | 0        |
| LOC729153 | 0          | 0        |
| LOC729154 | 0          | 0.031804 |
| LOC729156 | 0          | 0        |
| LOC729159 | 0          | 0        |
| LOC729162 | 0.04004825 | 0.060661 |
| LOC729172 | 0.02518004 | 0.014302 |
| LOC729173 | 0          | 0        |
| LOC729175 | 0.02315565 | 0        |
| LOC729176 | 0          | 0        |
| LOC729189 | 0          | 0        |
| LOC729196 | 0.20877957 | 0.279032 |
| LOC729200 | 0          | 0        |
| LOC729204 | 0          | 0        |
| LOC729217 | 0          | 0        |
| LOC729218 | 4.5836473  | 4.380714 |
| LOC729222 | 0          | 0        |
| LOC729225 | 0.08362348 | 0.230708 |
| LOC729227 | 0          | 0        |
| LOC729233 | 0          | 0        |
| LOC729234 | 0          | 0        |
| LOC729240 | 0          | 0        |
| LOC729242 | 0          | 0        |
| LOC729246 | 0          | 0        |
| LOC729248 | 0          | 0        |
| LOC729250 | 0          | 0        |
| LOC729251 | 0          | 0        |
| LOC729255 | 0          | 0        |
| LOC729261 | 0          | 0        |
| LOC729264 | 0          | 0.043036 |
| LOC729270 | 0          | 0        |
| LOC729273 | 0          | 0        |
| LOC729275 | 0          | 0        |
| LOC729278 | 0          | 0        |
| LOC729283 | 0          | 0        |
| LOC729284 | 0          | 0        |
| LOC729289 | 0.02117355 | 0.024053 |
| LOC729291 | 0          | 0        |
| LOC729296 | 0          | 0.127956 |
| LOC729298 | 0          | 0        |
| LOC729299 | 0          | 0        |
| LOC729310 | 0          | 0        |
| LOC729314 | 0          | 0        |
| LOC729317 | 0.50589118 | 0.532649 |

|           |            |          |
|-----------|------------|----------|
| LOC729321 | 0          | 0        |
| LOC729323 | 0          | 0        |
| LOC729324 | 0          | 0        |
| LOC729327 | 0          | 0        |
| LOC729334 | 0          | 0        |
| LOC729338 | 0          | 0        |
| LOC729339 | 0          | 0        |
| LOC729342 | 0          | 0        |
| LOC729346 | 0          | 0        |
| LOC729348 | 0          | 0        |
| LOC729350 | 0.6837506  | 0.543726 |
| LOC729355 | 0          | 0        |
| LOC729356 | 0          | 0        |
| LOC729366 | 0          | 0        |
| LOC729370 | 0          | 0.010931 |
| LOC729372 | 0          | 0        |
| LOC729375 | 0          | 0        |
| LOC729378 | 0          | 0.036135 |
| LOC729379 | 0          | 0        |
| LOC729383 | 0          | 0        |
| LOC729384 | 0          | 0        |
| LOC729385 | 0          | 0.03492  |
| LOC729387 | 0          | 0        |
| LOC729391 | 0          | 0        |
| LOC729394 | 0          | 0        |
| LOC729399 | 0          | 0        |
| LOC729400 | 0          | 0        |
| LOC729406 | 0          | 0        |
| LOC729409 | 0          | 0        |
| LOC729412 | 0          | 0        |
| LOC729417 | 0.03486788 | 0.019805 |
| LOC729421 | 0.79196265 | 0.58044  |
| LOC729424 | 0          | 0        |
| LOC729425 | 0          | 0        |
| LOC729426 | 0          | 0        |
| LOC729444 | 0          | 0        |
| LOC729445 | 0          | 0        |
| LOC729453 | 0          | 0        |
| LOC729454 | 0.05540272 | 0.031469 |
| LOC729456 | 0          | 0        |
| LOC729458 | 0          | 0        |
| LOC729459 | 0          | 0        |
| LOC729461 | 0          | 0        |
| LOC729462 | 0          | 0        |
| LOC729466 | 0          | 0        |
| LOC729467 | 0          | 0        |
| LOC729468 | 0          | 0.030622 |

|           |            |          |
|-----------|------------|----------|
| LOC729479 | 0          | 0        |
| LOC729490 | 0          | 0        |
| LOC729492 | 0          | 0        |
| LOC729493 | 0          | 0        |
| LOC729494 | 0          | 0        |
| LOC729496 | 0          | 0        |
| LOC729497 | 0          | 0        |
| LOC729501 | 0.00604003 | 0.006862 |
| LOC729505 | 0.10165349 | 0.17322  |
| LOC729506 | 0.01527634 | 0.040493 |
| LOC729516 | 0          | 0        |
| LOC729519 | 0          | 0        |
| LOC729523 | 0          | 0        |
| LOC729524 | 0          | 0        |
| LOC729526 | 0          | 0.057278 |
| LOC729532 | 0          | 0        |
| LOC729535 | 0.03007916 | 0.03417  |
| LOC729537 | 0.02253519 | 0        |
| LOC729549 | 0          | 0.020207 |
| LOC729557 | 0          | 0        |
| LOC729558 | 0          | 0        |
| LOC729561 | 0          | 0        |
| LOC729564 | 0          | 0        |
| LOC729570 | 1.24305166 | 1.008662 |
| LOC729574 | 0          | 0.140501 |
| LOC729580 | 6.78931172 | 6.373655 |
| LOC729587 | 0.04122614 | 0        |
| LOC729590 | 0.18243237 | 0.207246 |
| LOC729595 | 0.07283602 | 0.330971 |
| LOC729601 | 0          | 0        |
| LOC729602 | 0.16778319 | 0.035738 |
| LOC729603 | 0          | 0        |
| LOC729609 | 0          | 0        |
| LOC729626 | 0.0778716  | 0.088463 |
| LOC729627 | 0          | 0        |
| LOC729630 | 0          | 0        |
| LOC729635 | 0          | 0        |
| LOC729645 | 0.04672296 | 0        |
| LOC729650 | 0          | 0        |
| LOC729652 | 0          | 0        |
| LOC729654 | 0          | 0        |
| LOC729660 | 0.73545396 | 0.884634 |
| LOC729667 | 0          | 0        |
| LOC729668 | 0          | 0        |
| LOC729669 | 0.496173   | 0.457974 |
| LOC729674 | 0          | 0        |
| LOC729678 | 0          | 0        |

|           |            |          |
|-----------|------------|----------|
| LOC729681 | 0          | 0        |
| LOC729683 | 0          | 0        |
| LOC729686 | 0          | 0        |
| LOC729687 | 0.46209519 | 0.349965 |
| LOC729706 | 0          | 0        |
| LOC729707 | 0          | 0        |
| LOC729711 | 0          | 0        |
| LOC729722 | 0          | 0        |
| LOC729724 | 0          | 0        |
| LOC729732 | 0          | 0        |
| LOC729737 | 31.8418816 | 33.13096 |
| LOC729739 | 0          | 0        |
| LOC729747 | 0.73836798 | 0.893801 |
| LOC729756 | 0          | 0        |
| LOC729769 | 0          | 0.06984  |
| LOC729770 | 0          | 0        |
| LOC729774 | 0.03850793 | 0        |
| LOC729779 | 0          | 0        |
| LOC729790 | 0          | 0        |
| LOC729792 | 0.00434497 | 0        |
| LOC729799 | 0          | 0        |
| LOC729806 | 43.0801087 | 47.05837 |
| LOC729810 | 0          | 0        |
| LOC729815 | 0.01055489 | 0        |
| LOC729817 | 0          | 0        |
| LOC729828 | 0          | 0        |
| LOC729832 | 0          | 0        |
| LOC729835 | 0          | 0        |
| LOC729839 | 0          | 0        |
| LOC729852 | 0          | 0        |
| LOC729856 | 0          | 0.051037 |
| LOC729859 | 0          | 0        |
| LOC729860 | 0          | 0        |
| LOC729862 | 0          | 0        |
| LOC729863 | 0          | 0        |
| LOC729866 | 0          | 0        |
| LOC729870 | 0          | 0.02125  |
| LOC729879 | 0          | 0        |
| LOC729885 | 0          | 0        |
| LOC729887 | 0          | 0        |
| LOC729894 | 0          | 0        |
| LOC729897 | 0          | 0        |
| LOC729898 | 0.15346957 | 0.116229 |
| LOC729900 | 0          | 0        |
| LOC729907 | 0          | 0        |
| LOC729911 | 0          | 0        |
| LOC729912 | 0          | 0        |

|               |            |          |
|---------------|------------|----------|
| LOC729915     | 0.05391111 | 0.065327 |
| LOC729920     | 0.15235747 | 0.078673 |
| LOC729930     | 0          | 0        |
| LOC729941     | 0          | 0        |
| LOC729944     | 0          | 0        |
| LOC729945     | 0          | 0        |
| LOC729952     | 0          | 0        |
| LOC729956     | 0.0069678  | 0.015831 |
| LOC729960     | 0          | 0        |
| LOC729966     | 0          | 0        |
| LOC729970     | 0          | 0        |
| LOC729973     | 2.12490047 | 2.117474 |
| LOC729974     | 0          | 0        |
| LOC729977     | 0          | 0        |
| LOC729978     | 1.04705426 | 0.916029 |
| LOC729983     | 0          | 0        |
| LOC729984     | 0          | 0        |
| LOC729986     | 0          | 0        |
| LOC729989     | 0          | 0.026837 |
| LOC729991     | 2.60595651 | 2.388511 |
| LOC729991-MEF | 5.8056626  | 5.15145  |
| LOC729992     | 0          | 0        |
| LOC729993     | 0          | 0.002413 |
| LOC729995     | 0          | 0        |
| LOC729998     | 0          | 0        |
| LOC729999     | 0          | 0        |
| LOC730005     | 0          | 0        |
| LOC730007     | 0          | 0        |
| LOC730011     | 0.09372361 | 0.035491 |
| LOC730016     | 0          | 0        |
| LOC730020     | 0          | 0        |
| LOC730021     | 0          | 0        |
| LOC730036     | 0.37940447 | 0.538762 |
| LOC730041     | 0          | 0        |
| LOC730043     | 0          | 0        |
| LOC730045     | 0          | 0        |
| LOC730058     | 0.04492592 | 0        |
| LOC730060     | 0.4676626  | 0.354181 |
| LOC730066     | 0          | 0        |
| LOC730069     | 0          | 0        |
| LOC730076     | 0          | 0        |
| LOC730078     | 0.02505999 | 0.085406 |
| LOC730079     | 0.8748404  | 0.5963   |
| LOC730081     | 0          | 0        |
| LOC730086     | 0          | 0        |
| LOC730092     | 0          | 0        |
| LOC730098     | 0          | 0        |



|           |            |          |
|-----------|------------|----------|
| LOC730100 | 0          | 0        |
| LOC730101 | 0          | 0        |
| LOC730109 | 0.02092073 | 0        |
| LOC730110 | 0          | 0        |
| LOC730121 | 0          | 0.043507 |
| LOC730129 | 0          | 0        |
| LOC730130 | 0.03292926 | 0.018704 |
| LOC730134 | 0          | 0        |
| LOC730138 | 0          | 0        |
| LOC730144 | 0.30693914 | 0.290573 |
| LOC730152 | 0          | 0        |
| LOC730153 | 0.22730088 | 0.129109 |
| LOC730159 | 0.03774745 | 0        |
| LOC730163 | 0.14270587 | 0        |
| LOC730173 | 0          | 0        |
| LOC730174 | 0          | 0        |
| LOC730180 | 0          | 0        |
| LOC730184 | 0          | 0        |
| LOC730190 | 0          | 0        |
| LOC730196 | 0          | 0        |
| LOC730198 | 0          | 0        |
| LOC730202 | 0          | 0        |
| LOC730210 | 0          | 0        |
| LOC730222 | 0          | 0        |
| LOC730232 | 0          | 0        |
| LOC730234 | 0          | 0        |
| LOC730235 | 0          | 0        |
| LOC730236 | 0          | 0        |
| LOC730239 | 0          | 0        |
| LOC730246 | 0          | 0        |
| LOC730254 | 0.06823637 | 0.058138 |
| LOC730256 | 0.03235164 | 0.022051 |
| LOC730257 | 0          | 0        |
| LOC730268 | 11.3534929 | 10.59684 |
| LOC730275 | 0.02909678 | 0.013222 |
| LOC730351 | 0          | 0        |
| LOC730376 | 0          | 0        |
| LOC730382 | 0          | 0        |
| LOC730441 | 0          | 0        |
| LOC730456 | 0          | 0.008058 |
| LOC730631 | 0.05140668 | 0.145997 |
| LOC730651 | 0          | 0        |
| LOC730668 | 0          | 0        |
| LOC730792 | 0          | 0        |
| LOC730811 | 0          | 0        |
| LOC730974 | 0          | 0        |
| LOC730978 | 0          | 0        |

|           |            |          |
|-----------|------------|----------|
| LOC731039 | 0          | 0        |
| LOC731075 | 0.54510117 | 0.597128 |
| LOC731139 | 0.46722958 | 0.324366 |
| LOC731157 | 0          | 0        |
| LOC731184 | 0          | 0        |
| LOC731220 | 0.0121604  | 0.027629 |
| LOC731275 | 0.27574205 | 0.313247 |
| LOC731282 | 0.0927861  | 0.147569 |
| LOC731308 | 0          | 0        |
| LOC731631 | 0          | 0        |
| LOC731755 | 0          | 0        |
| LOC731779 | 0          | 0        |
| LOC731789 | 0          | 0        |
| LOC731797 | 0          | 0        |
| LOC731852 | 0.20653567 | 0.046926 |
| LOC731932 | 0          | 0        |
| LOC731957 | 0          | 0        |
| LOC732043 | 0          | 0        |
| LOC732229 | 0          | 0        |
| LOC732275 | 0          | 0        |
| LOC732391 | 0          | 0.030273 |
| LOC732448 | 0          | 0        |
| LOC732538 | 0          | 0        |
| LOC735247 | 0          | 0        |
| LOC751599 | 0          | 0        |
| LOC751602 | 0          | 0        |
| LOC751603 | 0          | 0        |
| LOC751837 | 0          | 0        |
| LOC767850 | 0          | 0        |
| LOC767851 | 0          | 0        |
| LOC767852 | 0          | 0        |
| LOC767853 | 0          | 0        |
| LOC767854 | 0          | 0        |
| LOC768086 | 0          | 0        |
| LOC768328 | 0          | 0        |
| LOC777650 | 0          | 0        |
| LOC777774 | 0          | 0        |
| LOC780780 | 0          | 0        |
| LOC780810 | 0          | 0        |
| LOC780811 | 0          | 0        |
| LOC780812 | 0          | 0        |
| LOC780813 | 0          | 0        |
| LOC780814 | 0          | 0        |
| LOC780815 | 0          | 0        |
| LOC780816 | 0          | 0        |
| LOC791082 | 0          | 0        |
| LOC791091 | 0          | 0        |

|           |            |          |
|-----------|------------|----------|
| LOC791092 | 0          | 0        |
| LOC791093 | 0          | 0        |
| LOC791094 | 0          | 0        |
| LOC791095 | 0          | 0        |
| LOC791096 | 0          | 0        |
| LOC791097 | 0          | 0        |
| LOC791098 | 0          | 0        |
| LOC791099 | 0          | 0        |
| LOC791126 | 0          | 0        |
| LOC79999  | 0          | 0        |
| LOC80054  | 0          | 0        |
| LOC80154  | 0          | 0        |
| LOC81691  | 0.78011855 | 0.894831 |
| LOC84740  | 0          | 0        |
| LOC84856  | 0          | 0        |
| LOC84931  | 0          | 0        |
| LOC84989  | 0          | 0        |
| LOC85389  | 0          | 0        |
| LOC85390  | 0          | 0        |
| LOC85391  | 0          | 0        |
| LOC89844  | 0          | 0        |
| LOC90110  | 0          | 0        |
| LOC90246  | 0          | 0        |
| LOC90586  | 0          | 0        |
| LOC90784  | 0          | 0        |
| LOC90826  | 8.68502187 | 8.617207 |
| LOC90834  | 0          | 0        |
| LOC91149  | 0          | 0        |
| LOC91219  | 0          | 0        |
| LOC91316  | 0          | 0        |
| LOC91431  | 1.00635217 | 0.867015 |
| LOC91450  | 0          | 0        |
| LOC91948  | 0          | 0        |
| LOC92249  | 0          | 0        |
| LOC92659  | 0          | 0        |
| LOC92973  | 0          | 0        |
| LOC93202  | 0          | 0        |
| LOC93432  | 0          | 0        |
| LOC93463  | 0          | 0        |
| LOC93622  | 0          | 0        |
| LOC96610  | 0          | 0        |
| LOH12CR1  | 2.28908879 | 2.07348  |
| LOH12CR2  | 0          | 0        |
| LOH3CR2A  | 0          | 0        |
| LONP1     | 5.08230437 | 4.675677 |
| LONP2     | 8.05276955 | 6.837676 |
| LONRF1    | 8.14848904 | 7.657363 |

|        |            |          |
|--------|------------|----------|
| LONRF2 | 1.14859485 | 0.793194 |
| LONRF3 | 0.12898976 | 0.247277 |
| LOR    | 0.03421535 | 0.038869 |
| LOX    | 0.01076566 | 0.01223  |
| LOXHD1 | 0          | 0.00332  |
| LOXL1  | 0.06233686 | 0.171981 |
| LOXL2  | 1.05954424 | 1.034395 |
| LOXL3  | 0.07410402 | 0.068877 |
| LOXL4  | 0.1494828  | 0.169815 |
| LPA    | 0          | 0.011043 |
| LPAL2  | 0          | 0        |
| LPAR1  | 0.54421627 | 0.263882 |
| LPAR2  | 58.2176898 | 63.42321 |
| LPAR3  | 0          | 0.027757 |
| LPAR4  | 0.48821667 | 0.363686 |
| LPAR5  | 0.03600228 | 0.040899 |
| LPCAT1 | 58.2432572 | 52.11627 |
| LPCAT2 | 119.631324 | 109.6906 |
| LPCAT3 | 23.8903412 | 23.86431 |
| LPCAT4 | 5.92852624 | 7.097933 |
| LPGAT1 | 44.7740664 | 39.26218 |
| LPHN1  | 0.69040797 | 0.580636 |
| LPHN2  | 0          | 0        |
| LPHN3  | 0.00343271 | 0        |
| LPIN1  | 27.0292049 | 33.19308 |
| LPIN2  | 74.8392419 | 85.06841 |
| LPIN3  | 0.01927603 | 0.005474 |
| LPL    | 0.02805622 | 0.006374 |
| LPO    | 0.00720539 | 0        |
| LPP    | 0.98189657 | 1.082546 |
| LPPR2  | 30.4475035 | 50.69347 |
| LPPR4  | 0.00845749 | 0        |
| LPXN   | 33.6178218 | 27.80147 |
| LQK1   | 0          | 0        |
| LRAT   | 0.00430142 | 0.004886 |
| LRBA   | 2.66830268 | 2.772667 |
| LRCH1  | 1.25252993 | 1.74993  |
| LRCH2  | 0          | 0        |
| LRCH3  | 9.87017308 | 9.795222 |
| LRCH4  | 78.7875179 | 76.55771 |
| LRDD   | 3.04675161 | 3.344227 |
| LRFN1  | 13.4127111 | 17.54778 |
| LRFN2  | 0          | 0.015194 |
| LRFN3  | 0.02507992 | 0        |
| LRFN4  | 0          | 0        |
| LRFN5  | 0.01126759 | 0.0064   |
| LRG1   | 86.9361999 | 94.03755 |

|         |            |          |
|---------|------------|----------|
| LRGUK   | 0          | 0.008846 |
| LRIG1   | 13.8947326 | 22.55091 |
| LRIG2   | 3.09488682 | 2.677036 |
| LRIG3   | 0          | 0        |
| LRIT1   | 0          | 0.01038  |
| LRIT2   | 0.00679113 | 0        |
| LRIT3   | 0          | 0.013182 |
| LRLE1   | 0.24167047 | 0.137271 |
| LRMP    | 126.009771 | 88.87403 |
| LRP1    | 0.01551685 | 0.01282  |
| LRP10   | 159.235202 | 170.3246 |
| LRP11   | 0.07047597 | 0.033359 |
| LRP12   | 1.15046193 | 1.248857 |
| LRP1B   | 0.00127187 | 0.001445 |
| LRP2    | 0          | 0.004554 |
| LRP2BP  | 0.02445754 | 0.037046 |
| LRP3    | 0.01705679 | 0.025836 |
| LRP4    | 0.00263475 | 0.002993 |
| LRP5    | 0.28290714 | 0.521672 |
| LRP5L   | 8.92445889 | 7.653033 |
| LRP6    | 0          | 0        |
| LRP8    | 0.351411   | 0.642881 |
| LRPAP1  | 207.266909 | 202.6127 |
| LRPPRC  | 1.0577784  | 0.927402 |
| LRRC1   | 0.3371987  | 0.270397 |
| LRRC10  | 0.00808978 | 0        |
| LRRC14  | 1.38246587 | 1.238454 |
| LRRC15  | 0          | 0        |
| LRRC16A | 0.00396405 | 0.004503 |
| LRRC16B | 0          | 0.005192 |
| LRRC17  | 0.01050216 | 0.023861 |
| LRRC18  | 0          | 0        |
| LRRC19  | 0          | 0        |
| LRRC2   | 0.00400178 | 0.004546 |
| LRRC20  | 0.03898393 | 0.06643  |
| LRRC23  | 1.35496577 | 1.220794 |
| LRRC24  | 0.27586002 | 0.23163  |
| LRRC25  | 15.9943009 | 18.90532 |
| LRRC26  | 0          | 0        |
| LRRC27  | 0.2115934  | 0.178945 |
| LRRC28  | 4.78507532 | 3.591003 |
| LRRC29  | 0.30981733 | 0.527936 |
| LRRC3   | 0.36930721 | 0.410004 |
| LRRC30  | 0          | 0        |
| LRRC31  | 0          | 0.009643 |
| LRRC32  | 0          | 0.005372 |
| LRRC33  | 16.7946761 | 11.05595 |

|           |            |          |
|-----------|------------|----------|
| LRRRC34   | 0.39504797 | 0.315809 |
| LRRRC36   | 0          | 0.029944 |
| LRRRC37A  | 1.6529476  | 1.342586 |
| LRRRC37A2 | 0.09344592 | 0.129233 |
| LRRRC37A3 | 2.31594113 | 2.449647 |
| LRRRC37A4 | 0          | 0        |
| LRRRC37B  | 6.41803958 | 6.32044  |
| LRRRC37B2 | 0          | 0        |
| LRRRC38   | 0          | 0.010151 |
| LRRRC39   | 0.78542903 | 1.029531 |
| LRRRC3B   | 0          | 0        |
| LRRRC4    | 0.19284091 | 0.199741 |
| LRRRC40   | 2.54785359 | 2.231626 |
| LRRRC41   | 6.64708564 | 6.846308 |
| LRRRC42   | 3.49604395 | 2.731319 |
| LRRRC43   | 0.01006478 | 0.034301 |
| LRRRC45   | 0.80088794 | 0.652498 |
| LRRRC46   | 1.07407219 | 0.735441 |
| LRRRC47   | 11.0208306 | 10.71583 |
| LRRRC48   | 0.76014658 | 1.433107 |
| LRRRC49   | 0          | 0.008552 |
| LRRRC4B   | 0.03553978 | 0        |
| LRRRC4C   | 0          | 0.005892 |
| LRRRC50   | 0.02589326 | 0.009805 |
| LRRRC52   | 0          | 0        |
| LRRRC55   | 0.00553735 | 0        |
| LRRRC56   | 0.21980339 | 0.25831  |
| LRRRC57   | 7.34798316 | 5.36055  |
| LRRRC58   | 2.37263594 | 2.549237 |
| LRRRC59   | 16.2819925 | 15.39694 |
| LRRRC6    | 0.05316139 | 0.045294 |
| LRRRC61   | 1.01752748 | 1.39928  |
| LRRRC63   | 0.01107179 | 0.012578 |
| LRRRC66   | 0          | 0        |
| LRRRC67   | 0          | 0        |
| LRRRC68   | 3.22988836 | 3.845608 |
| LRRRC69   | 0.01589216 | 0.036107 |
| LRRRC7    | 0.01346699 | 0.011474 |
| LRRRC70   | 0.01869749 | 0        |
| LRRRC8A   | 4.96609224 | 5.400853 |
| LRRRC8B   | 0.40428313 | 0.331861 |
| LRRRC8C   | 0.03792553 | 0.049712 |
| LRRRC8D   | 1.19285301 | 1.378667 |
| LRRRC8E   | 0.00583713 | 0        |
| LRRRC9    | 0          | 0        |
| LRRCC1    | 0.02750567 | 0.043746 |
| LRRFIP1   | 43.0704162 | 44.60828 |

|           |            |          |
|-----------|------------|----------|
| LRRFIP2   | 13.478483  | 10.71511 |
| LRRIQ1    | 0          | 0        |
| LRRIQ3    | 0.00733868 | 0.016674 |
| LRRIQ4    | 0          | 0        |
| LRRK1     | 12.8863154 | 17.62509 |
| LRRK2     | 1.26493861 | 1.012366 |
| LRRN1     | 0.12099327 | 0.068725 |
| LRRN2     | 0.3731933  | 0.373654 |
| LRRN3     | 0          | 0        |
| LRRN4     | 0          | 0.008879 |
| LRRN4CL   | 0.00870975 | 0.009894 |
| LRRTM1    | 0          | 0        |
| LRRTM2    | 0          | 0        |
| LRRTM3    | 0          | 0        |
| LRRTM4    | 0          | 0        |
| LRSAM1    | 16.0715548 | 13.49192 |
| LRTM1     | 0          | 0        |
| LRTM2     | 0          | 0        |
| LRTOMT    | 0.95247662 | 1.095442 |
| LRWD1     | 22.30713   | 22.8419  |
| LSAMP     | 0          | 0        |
| LSDP5     | 33.1480443 | 33.04009 |
| LSG1      | 11.1071667 | 11.73527 |
| LSM1      | 18.2858742 | 17.2201  |
| LSM10     | 44.2521378 | 40.09888 |
| LSM11     | 0.75530279 | 0.438344 |
| LSM12     | 7.27083708 | 6.961682 |
| LSM12P    | 0          | 0        |
| LSM14A    | 38.5222859 | 42.75511 |
| LSM14B    | 35.817632  | 30.50554 |
| LSM2      | 5.02353479 | 4.398423 |
| LSM3      | 19.332773  | 16.66403 |
| LSM4      | 18.4246367 | 22.65756 |
| LSM5      | 1.55310229 | 1.27109  |
| LSM6      | 2.03040045 | 2.09412  |
| LSM7      | 10.5126655 | 9.921507 |
| LSM8      | 14.124132  | 11.91514 |
| LSMD1     | 1.72580294 | 1.96054  |
| LSP1      | 340.039709 | 380.8353 |
| LSR       | 0.27689198 | 0.366979 |
| LSS       | 5.54969919 | 4.640707 |
| LST1      | 84.2761188 | 80.33566 |
| LST-3TM12 | 0          | 0        |
| LTA       | 0          | 0        |
| LTA4H     | 3.94990441 | 3.478414 |
| LTB       | 14.604844  | 11.88912 |
| LTB4R     | 8.69621709 | 7.796694 |

|        |            |          |
|--------|------------|----------|
| LTB4R2 | 0.52600899 | 0.554872 |
| LTBP1  | 1.07190573 | 0.960547 |
| LTBP2  | 1.71565128 | 1.689326 |
| LTBP3  | 0.27983184 | 0.285565 |
| LTBP4  | 0.22005947 | 0.144732 |
| LTBR   | 0.0399152  | 0.05668  |
| LTC4S  | 177.249529 | 266.8185 |
| LTF    | 0.30277901 | 0.354078 |
| LTK    | 0.01344761 | 0.015277 |
| LTV1   | 2.80492287 | 2.106735 |
| LUC7L  | 23.2268306 | 21.53331 |
| LUC7L2 | 45.1725333 | 43.1132  |
| LUM    | 0          | 0        |
| LUZP1  | 4.60788448 | 5.335945 |
| LUZP2  | 0.00399949 | 0.004543 |
| LUZP4  | 0          | 0.013822 |
| LUZP6  | 23.791537  | 17.60635 |
| LUZPP1 | 0          | 0        |
| LVRN   | 0.00909991 | 0.015506 |
| LXN    | 0.37679805 | 0.535061 |
| LY6D   | 0          | 0        |
| LY6E   | 7.38389599 | 7.636736 |
| LY6G5B | 44.6856194 | 42.55499 |
| LY6G5C | 1.31958144 | 1.132627 |
| LY6G6C | 0.59731054 | 1.139971 |
| LY6G6D | 0          | 0        |
| LY6G6E | 0          | 0        |
| LY6G6F | 0          | 0        |
| LY6H   | 0.03634457 | 0        |
| LY6K   | 0          | 0        |
| LY75   | 4.97784651 | 5.223898 |
| LY86   | 0.07175881 | 0.027173 |
| LY9    | 0.68710232 | 0.312224 |
| LY96   | 0          | 0.039875 |
| LYAR   | 3.06537536 | 2.29178  |
| LYG1   | 0.44599187 | 0.482527 |
| LYG2   | 0.02416705 | 0        |
| LYL1   | 95.3759812 | 148.8411 |
| LYN    | 68.692721  | 60.50843 |
| LYNX1  | 0.0035861  | 0.012222 |
| LYPD1  | 0.37120005 | 0.262561 |
| LYPD2  | 0          | 0        |
| LYPD3  | 0.09859475 | 0.056003 |
| LYPD4  | 0          | 0        |
| LYPD5  | 0          | 0.009123 |
| LYPD6  | 0.00603309 | 0        |
| LYPD6B | 0          | 0        |



|          |            |          |
|----------|------------|----------|
| LYPLA1   | 19.154779  | 18.82785 |
| LYPLA2   | 31.3696902 | 31.636   |
| LYPLA2P1 | 0          | 0        |
| LYPLAL1  | 2.44480593 | 1.843143 |
| LYRM1    | 11.1175934 | 11.50299 |
| LYRM2    | 1.70401375 | 1.391625 |
| LYRM4    | 0.14187133 | 0.128934 |
| LYRM5    | 2.53785933 | 2.293812 |
| LYRM7    | 0.44669945 | 0.315239 |
| LYSMD1   | 1.42516199 | 1.485677 |
| LYSMD2   | 19.971261  | 25.71949 |
| LYSMD3   | 8.93613574 | 8.352221 |
| LYSMD4   | 2.52158215 | 1.50679  |
| LYST     | 18.131579  | 13.81572 |
| LYVE1    | 0          | 0        |
| LYZ      | 20.5676556 | 13.0927  |
| LYZL1    | 0          | 0        |
| LYZL2    | 0          | 0        |
| LYZL4    | 0          | 0.027391 |
| LYZL6    | 0.02411162 | 0.027391 |
| LZIC     | 6.24633144 | 5.007894 |
| LZTFL1   | 0.21656462 | 0.217904 |
| LZTR1    | 6.08589534 | 5.480014 |
| LZTS1    | 0.0038515  | 0.004375 |
| LZTS2    | 1.83128794 | 1.566807 |
| M6PR     | 71.5580946 | 60.1605  |
| M6PRBP1  | 15.9006416 | 17.52928 |
| MAB21L1  | 0          | 0        |
| MAB21L2  | 0          | 0        |
| MACC1    | 0.02295592 | 0.005216 |
| MACF1    | 7.85974932 | 7.332496 |
| MACROD1  | 0.21744575 | 0.247022 |
| MACROD2  | 0.02470178 | 0.018708 |
| MACSL1   | 0          | 0        |
| MAD1L1   | 3.95472807 | 4.082626 |
| MAD2L1   | 0.38015202 | 0.265759 |
| MAD2L1BP | 9.57104023 | 8.938599 |
| MAD2L1P  | 0          | 0        |
| MAD2L2   | 1.75738836 | 1.474834 |
| MADCAM1  | 0.0683973  | 0.04662  |
| MADD     | 50.1401023 | 49.20437 |
| MAEA     | 60.5786946 | 51.93838 |
| MAEL     | 0          | 0.013798 |
| MAF      | 0.04891034 | 0.065981 |
| MAF1     | 52.5100237 | 52.76254 |
| MAFA     | 0.01979786 | 0.022491 |
| MAFB     | 0.01876145 | 0        |

|          |            |          |
|----------|------------|----------|
| MAFF     | 1.00631243 | 0.908927 |
| MAFG     | 22.9634651 | 24.07736 |
| MAFK     | 16.8767507 | 19.30059 |
| MAG      | 0.00867024 | 0        |
| MAGEA1   | 0          | 0        |
| MAGEA10  | 0          | 0        |
| MAGEA11  | 0          | 0        |
| MAGEA12  | 0          | 0        |
| MAGEA13P | 0          | 0        |
| MAGEA2   | 0          | 0        |
| MAGEA2B  | 0          | 0        |
| MAGEA3   | 0          | 0        |
| MAGEA4   | 0          | 0        |
| MAGEA5   | 0          | 0        |
| MAGEA6   | 0          | 0        |
| MAGEA7   | 0          | 0        |
| MAGEA8   | 0          | 0        |
| MAGEA9   | 0          | 0        |
| MAGEA9B  | 0          | 0        |
| MAGEB1   | 0          | 0.012137 |
| MAGEB10  | 0          | 0.030485 |
| MAGEB16  | 0          | 0        |
| MAGEB17  | 0.0312412  | 0.059151 |
| MAGEB18  | 0          | 0        |
| MAGEB2   | 0          | 0        |
| MAGEB3   | 0          | 0        |
| MAGEB4   | 0          | 0        |
| MAGEB5   | 0          | 0        |
| MAGEB6   | 0          | 0.012255 |
| MAGEB6B  | 0          | 0        |
| MAGEC1   | 0          | 0.005582 |
| MAGEC2   | 0.01055489 | 0        |
| MAGEC3   | 0.01562641 | 0        |
| MAGED1   | 1.6347531  | 1.479253 |
| MAGED2   | 30.9271688 | 33.29724 |
| MAGED4   | 0          | 0.009573 |
| MAGED4B  | 0          | 0        |
| MAGEE1   | 0.10431531 | 0.026334 |
| MAGEE2   | 0          | 0        |
| MAGEF1   | 2.18753443 | 2.385671 |
| MAGEH1   | 2.51671198 | 2.793676 |
| MAGEL2   | 0.00847796 | 0.009631 |
| MAGI1    | 0.01605162 | 0.00521  |
| MAGI2    | 0.01528004 | 0.017358 |
| MAGI3    | 0.23293539 | 0.373773 |
| MAGIX    | 0.48160587 | 0.636936 |
| Magmas   | 13.5780024 | 14.81718 |

|           |            |          |
|-----------|------------|----------|
| MAGOH     | 25.6255869 | 26.05967 |
| MAGOHB    | 0.19566031 | 0.435285 |
| MAGOHP    | 0          | 0        |
| MAGT1     | 13.962869  | 13.641   |
| MAK       | 0.37329569 | 0.35547  |
| MAK10     | 6.6470749  | 6.094883 |
| MAK16     | 0.34120571 | 0.367566 |
| MAL       | 0.0398207  | 0        |
| MAL2      | 0.0447665  | 0.067807 |
| MALAT1    | 0          | 0        |
| MALL      | 0.01373756 | 0        |
| MALT1     | 6.9945076  | 5.69937  |
| MAMDC2    | 0.00581131 | 0        |
| MAMDC4    | 0.03446776 | 0.09789  |
| MAML1     | 37.0064929 | 38.52168 |
| MAML2     | 0.01936748 | 0.008801 |
| MAML3     | 4.87208488 | 4.60444  |
| MAMLD1    | 0.05022337 | 0.025934 |
| MAN1A1    | 7.50831809 | 6.41456  |
| MAN1A2    | 5.32267102 | 5.399418 |
| MAN1B1    | 13.1648905 | 13.74859 |
| MAN1C1    | 0.8407505  | 1.358041 |
| MAN2A1    | 5.35063512 | 4.946565 |
| MAN2A2    | 21.1494237 | 27.70657 |
| MAN2B1    | 48.2656558 | 55.81589 |
| MAN2B2    | 21.0748956 | 18.96957 |
| MAN2C1    | 27.467327  | 27.15151 |
| MANBA     | 89.7085021 | 90.25989 |
| MANBAL    | 12.0396002 | 11.15244 |
| MANEA     | 0.37233315 | 0.428198 |
| MANEAL    | 0          | 0        |
| MANSC1    | 0.37528889 | 0.176773 |
| MAOA      | 0          | 0        |
| MAOB      | 0.00810225 | 0        |
| MAP1A     | 0.14323826 | 0.125528 |
| MAP1B     | 0.00351036 | 0        |
| MAP1D     | 0.01370621 | 0.031141 |
| MAP1LC3A  | 9.54673814 | 9.502907 |
| MAP1LC3B  | 50.1373277 | 46.38179 |
| MAP1LC3B2 | 7.98558243 | 7.291848 |
| MAP1LC3C  | 0          | 0        |
| MAP1LC3P  | 0          | 0        |
| MAP1S     | 10.2751999 | 11.49052 |
| MAP2      | 0.00631455 | 0        |
| MAP2K1    | 7.51253125 | 6.603965 |
| MAP2K1P1  | 0          | 0        |
| MAP2K2    | 66.4347107 | 64.39613 |

|           |            |          |
|-----------|------------|----------|
| MAP2K3    | 69.7176845 | 89.92954 |
| MAP2K4    | 9.7796156  | 10.35681 |
| MAP2K5    | 1.50307992 | 1.414516 |
| MAP2K6    | 0.12374459 | 0.063898 |
| MAP2K7    | 15.6692339 | 15.49132 |
| MAP3K1    | 9.24476413 | 9.096818 |
| MAP3K10   | 2.74748941 | 2.307874 |
| MAP3K11   | 34.9068747 | 35.93128 |
| MAP3K12   | 0.26250413 | 0.227207 |
| MAP3K13   | 0.09457557 | 0.087294 |
| MAP3K14   | 3.14885749 | 2.887387 |
| MAP3K15   | 0.04028699 | 0.035596 |
| MAP3K2    | 36.4634813 | 46.76473 |
| MAP3K3    | 40.3472006 | 35.49111 |
| MAP3K4    | 2.12016922 | 2.730847 |
| MAP3K5    | 21.1750783 | 18.34947 |
| MAP3K6    | 0.64611114 | 0.629136 |
| MAP3K7    | 13.8038006 | 12.60891 |
| MAP3K7IP1 | 3.62036382 | 3.172724 |
| MAP3K7IP2 | 21.7389305 | 25.48881 |
| MAP3K7IP3 | 9.99996587 | 10.10727 |
| MAP3K8    | 14.7231646 | 15.8694  |
| MAP3K9    | 0.881998   | 0.797307 |
| MAP4      | 0.98598671 | 0.994323 |
| MAP4K1    | 4.89506626 | 4.400567 |
| MAP4K2    | 13.5401708 | 14.79179 |
| MAP4K3    | 0.38850599 | 0.464578 |
| MAP4K4    | 0.15734579 | 0.156404 |
| MAP4K5    | 42.8624508 | 47.26029 |
| MAP6      | 0.00375721 | 0.008536 |
| MAP6D1    | 0.89490417 | 0.681474 |
| MAP7      | 0.06323408 | 0.071835 |
| MAP7D1    | 68.6422658 | 94.84343 |
| MAP7D2    | 0.59528117 | 0.432799 |
| MAP7D3    | 0.69459303 | 0.528676 |
| MAP9      | 0.03727387 | 0.032572 |
| MAPK1     | 54.4113852 | 54.83245 |
| MAPK10    | 0.32142414 | 0.293702 |
| MAPK11    | 0.00880458 | 0.090019 |
| MAPK12    | 0.26371567 | 0.354055 |
| MAPK13    | 21.7714629 | 33.1077  |
| MAPK14    | 16.5860328 | 13.20465 |
| MAPK15    | 0          | 0.012651 |
| MAPK1IP1L | 10.4817889 | 10.98811 |
| MAPK3     | 46.5340827 | 46.37018 |
| MAPK4     | 0.00443947 | 0.010087 |
| MAPK6     | 4.24487747 | 3.96295  |

|          |            |          |
|----------|------------|----------|
| MAPK6PS1 | 0          | 0        |
| MAPK6PS2 | 0          | 0        |
| MAPK6PS3 | 0          | 0        |
| MAPK6PS4 | 0          | 0        |
| MAPK6PS5 | 0          | 0        |
| MAPK6PS6 | 0          | 0        |
| MAPK7    | 5.25633274 | 4.697884 |
| MAPK8    | 17.5517034 | 16.39394 |
| MAPK8IP1 | 0.21370009 | 0.344572 |
| MAPK8IP2 | 0.04871203 | 0.013834 |
| MAPK8IP3 | 51.3483145 | 51.90255 |
| MAPK9    | 8.2310705  | 9.342424 |
| MAPKAP1  | 7.25894854 | 6.215432 |
| MAPKAPK2 | 61.7403073 | 69.02657 |
| MAPKAPK3 | 37.1391446 | 30.38186 |
| MAPKAPK5 | 5.60606917 | 4.720932 |
| MAPKBP1  | 1.15421817 | 0.978466 |
| MAPKSP1  | 12.0895653 | 12.50062 |
| MAPRE1   | 61.9137081 | 61.87545 |
| MAPRE1P  | 0          | 0        |
| MAPRE2   | 11.4252134 | 9.365325 |
| MAPRE3   | 1.58533244 | 1.456098 |
| MAPT     | 0.02468486 | 0.028042 |
| MARCH1   | 10.0898097 | 2.882225 |
| MARCH10  | 0.00632912 | 0.00719  |
| MARCH11  | 0.0412801  | 0.015632 |
| MARCH2   | 11.5111461 | 10.83716 |
| MARCH3   | 19.3579449 | 30.00076 |
| MARCH4   | 0.00472479 | 0        |
| MARCH5   | 7.87244944 | 8.07324  |
| MARCH6   | 62.1412297 | 56.14114 |
| MARCH7   | 31.8290045 | 29.27785 |
| MARCH8   | 17.3478094 | 15.51229 |
| MARCH9   | 3.21101724 | 3.919409 |
| MARCKS   | 0.11759682 | 0.077929 |
| MARCKSL1 | 437.751199 | 602.1334 |
| MARCO    | 0          | 0        |
| MARK1    | 0          | 0.004527 |
| MARK2    | 60.9209131 | 65.84462 |
| MARK3    | 37.7408262 | 34.84034 |
| MARK4    | 4.30170489 | 3.876412 |
| MARS     | 36.8827183 | 33.52461 |
| MARS2    | 0.37495636 | 0.291859 |
| MARVELD1 | 0          | 0        |
| MARVELD2 | 0.00660343 | 0.007502 |
| MARVELD3 | 0.00621316 | 0        |
| MAS1     | 0          | 0        |

|                |            |          |
|----------------|------------|----------|
| MAS1L          | 0          | 0        |
| MAS1LP         | 0          | 0        |
| MASP1          | 0.00567868 | 0.003226 |
| MASP2          | 3.00823966 | 2.958079 |
| MAST1          | 0.00870074 | 0.014826 |
| MAST2          | 3.02298676 | 3.454974 |
| MAST3          | 51.230736  | 62.10615 |
| MAST4          | 0.04636505 | 0.049899 |
| MASTL          | 2.63750394 | 2.206386 |
| MAT1A          | 0          | 0.007017 |
| MAT2A          | 22.6065194 | 24.57989 |
| MAT2B          | 54.1272715 | 50.19868 |
| MATK           | 0.06593597 | 0.084267 |
| MATN1          | 0.10979285 | 0.218271 |
| MATN2          | 0.11254435 | 0.087172 |
| MATN3          | 0.01627978 | 0.018494 |
| MATN4          | 0          | 0        |
| MATR3          | 44.0940186 | 43.58731 |
| MAVS           | 10.0353047 | 8.357757 |
| MAX            | 146.688186 | 134.7187 |
| MAZ            | 79.2970471 | 102.4593 |
| MB             | 0.01513703 | 0        |
| MBD1           | 21.5864364 | 21.96551 |
| MBD2           | 26.7461768 | 30.59833 |
| MBD3           | 9.43223132 | 9.623114 |
| MBD3L1         | 0          | 0        |
| MBD3L2         | 0          | 0        |
| MBD3L3         | 0          | 0        |
| MBD3L4         | 0          | 0        |
| MBD3L5         | 0          | 0        |
| MBD4           | 38.6627746 | 48.14735 |
| MBD5           | 0.41567685 | 0.346291 |
| MBD6           | 56.9001186 | 53.73286 |
| MBIP           | 1.12271185 | 1.130485 |
| MBL1P1         | 0          | 0        |
| MBL2           | 0          | 0        |
| MBLAC1         | 0.40594847 | 0.333946 |
| MBLAC2         | 0.23088564 | 0.17858  |
| MBNL1          | 58.9856748 | 50.60436 |
| MBNL2          | 14.1152201 | 14.3595  |
| MBNL3 (NC_000) | 0          | 0        |
| MBNL3 (NC_000) | 0.82256322 | 0.742316 |
| MBOAT1         | 51.4494664 | 44.29138 |
| MBOAT2         | 14.1329577 | 14.54204 |
| MBOAT4         | 0.02528603 | 0.071813 |
| MBOAT7         | 175.535325 | 149.9974 |
| MBP            | 67.3450492 | 57.13041 |

|          |            |          |
|----------|------------|----------|
| MBTD1    | 8.64530981 | 7.646608 |
| MBTPS1   | 25.6057286 | 26.77528 |
| MBTPS2   | 0.29606523 | 0.245578 |
| MC1R     | 0.35279678 | 0.385368 |
| MC2R     | 0.01151442 | 0        |
| MC3R     | 0          | 0        |
| MC4R     | 0          | 0        |
| MC5R     | 0.02149829 | 0        |
| MCAM     | 0.07572148 | 0.114694 |
| MCART1   | 2.35112319 | 1.531097 |
| MCART2   | 0.49680107 | 0.201562 |
| MCART3P  | 0          | 0        |
| MCART4P  | 0          | 0        |
| MCART5P  | 0          | 0        |
| MCART6   | 0.1148556  | 0.09594  |
| MCAT     | 0.58205142 | 0.846825 |
| MCC      | 0.15202862 | 0.134041 |
| MCCC1    | 2.71214328 | 1.686562 |
| MCCC2    | 1.2818928  | 1.1637   |
| MCCD1    | 0.11861964 | 0.067377 |
| MCEE     | 3.02088089 | 2.196332 |
| MCF2     | 0.06564104 | 0.074569 |
| MCF2L    | 0.02592063 | 0.008413 |
| MCF2L2   | 0.10574349 | 0.045047 |
| MCFD2    | 16.0799937 | 13.77853 |
| MCFD2L   | 0          | 0        |
| MCHR1    | 0          | 0.009858 |
| MCHR2    | 0          | 0        |
| MCL1     | 232.929129 | 255.1109 |
| MCM10    | 0.00464854 | 0        |
| MCM2     | 0.9058949  | 0.681438 |
| MCM3     | 4.76466034 | 3.930947 |
| MCM3AP   | 25.0735584 | 24.38133 |
| MCM3APAS | 0          | 0        |
| MCM4     | 0.89862015 | 1.494087 |
| MCM5     | 6.30925092 | 7.298749 |
| MCM6     | 4.1534978  | 3.362127 |
| MCM7     | 24.5753796 | 24.35712 |
| MCM8     | 2.12496012 | 2.10189  |
| MCM9     | 3.2569653  | 2.925103 |
| MCOLN1   | 57.2840319 | 50.36719 |
| MCOLN2   | 0.1243285  | 0.117699 |
| MCOLN3   | 0          | 0.008543 |
| MCPH1    | 3.78518782 | 3.565519 |
| MCRS1    | 24.4406131 | 21.14499 |
| MCTP1    | 2.04770128 | 1.863182 |
| MCTP2    | 20.2838233 | 13.93072 |

|         |            |          |
|---------|------------|----------|
| MCTS1   | 1.91676712 | 1.80817  |
| MDC1    | 5.14789591 | 5.267821 |
| MDFI    | 0          | 0        |
| MDFIC   | 1.61557785 | 1.63831  |
| MDGA1   | 0.323394   | 0.375426 |
| MDGA2   | 0.00381377 | 0.004333 |
| MDH1    | 16.4985838 | 16.42572 |
| MDH1B   | 0          | 0        |
| MDH2    | 23.6333735 | 22.09281 |
| MDK     | 0.92707366 | 1.39098  |
| MDM1    | 4.19475506 | 3.247864 |
| MDM2    | 5.05128344 | 4.456369 |
| MDM4    | 10.9478667 | 10.57793 |
| MDN1    | 1.44156436 | 1.240928 |
| MDP-1   | 8.9888677  | 8.148214 |
| MDS1    | 0          | 0.022857 |
| MDS2    | 0          | 0        |
| ME1     | 0          | 0.007109 |
| ME2     | 13.9910925 | 15.16445 |
| ME3     | 0.018063   | 0        |
| MEA1    | 21.3160037 | 20.08771 |
| MECP2   | 21.2265303 | 20.89277 |
| MECR    | 0.01727636 | 0.058879 |
| MED1    | 7.62516605 | 7.258165 |
| MED10   | 17.568832  | 14.54482 |
| MED11   | 18.8372881 | 16.02817 |
| MED12   | 15.5585639 | 13.11299 |
| MED12L  | 0.19128843 | 0.186263 |
| MED13   | 15.9362566 | 16.09306 |
| MED13L  | 92.7979819 | 96.93361 |
| MED13P1 | 0          | 0        |
| MED14   | 24.8992358 | 34.91715 |
| MED14P1 | 0          | 0        |
| MED15   | 40.2253517 | 39.61743 |
| MED15P  | 0          | 0        |
| MED16   | 8.64310801 | 8.135967 |
| MED17   | 9.27711915 | 8.674318 |
| MED18   | 11.7894847 | 11.54    |
| MED19   | 5.66226735 | 6.432425 |
| MED20   | 2.51998519 | 2.245856 |
| MED21   | 14.7884958 | 12.07199 |
| MED22   | 14.5980665 | 15.92546 |
| MED23   | 13.6711793 | 12.1889  |
| MED24   | 5.11989595 | 4.065007 |
| MED25   | 21.8904967 | 20.98777 |
| MED26   | 6.2270374  | 6.398869 |
| MED27   | 4.66385593 | 3.537896 |



|         |            |          |
|---------|------------|----------|
| MED28   | 23.6842721 | 22.44939 |
| MED29   | 14.0994089 | 14.26277 |
| MED30   | 16.3746662 | 15.16164 |
| MED31   | 2.41232662 | 2.596208 |
| MED4    | 16.1589339 | 15.0729  |
| MED6    | 11.9049679 | 11.00066 |
| MED7    | 3.09321818 | 3.076726 |
| MED8    | 11.8914711 | 10.81241 |
| MED9    | 3.42536895 | 3.289308 |
| MEF2A   | 11.8288195 | 10.50175 |
| MEF2AP  | 0          | 0        |
| MEF2B   | 0.49266799 | 0.395067 |
| MEF2C   | 0.08003786 | 0.08393  |
| MEF2D   | 45.2577945 | 54.36566 |
| MEFV    | 0.09013431 | 0.05461  |
| MEG3    | 0          | 0        |
| MEG8    | 0          | 0        |
| MEGF10  | 0          | 0        |
| MEGF11  | 0.05688287 | 0.036349 |
| MEGF6   | 14.5670864 | 14.99121 |
| MEGF8   | 0.4218104  | 0.385525 |
| MEGF9   | 40.5614929 | 24.06718 |
| MEI1    | 2.96013147 | 2.361084 |
| MEIG1   | 0.03364053 | 0.038216 |
| MEIS1   | 0.00660966 | 0.015017 |
| MEIS2   | 0.27195615 | 0.283623 |
| MEIS3   | 0.02920185 | 0.011058 |
| MEIS3P1 | 0          | 0        |
| MEIS3P2 | 0          | 0        |
| MELK    | 0.04310236 | 0.019586 |
| MEMO1   | 11.5674092 | 12.15323 |
| MEMO1P  | 0          | 0        |
| MEN1    | 5.49565014 | 4.625038 |
| MEOX1   | 0          | 0.010212 |
| MEOX2   | 0.00886771 | 0        |
| MEP1A   | 0.00717833 | 0        |
| MEP1B   | 0.018188   | 0.010331 |
| MEPCE   | 24.9977178 | 20.87665 |
| MEPE    | 0.01071082 | 0        |
| MERTK   | 0.03479095 | 0.039523 |
| MESDC1  | 7.44259503 | 8.298334 |
| MESDC2  | 3.13670386 | 2.780873 |
| MESP1   | 0          | 0        |
| MESP2   | 0          | 0        |
| MEST    | 0.26216123 | 0.314838 |
| MESTIT1 | 0          | 0        |
| MESTP1  | 0          | 0        |

|              |            |          |
|--------------|------------|----------|
| MET          | 0.00314939 | 0.010733 |
| METAP1       | 4.38723512 | 4.33726  |
| METAP2       | 2.30283146 | 2.227733 |
| METRN        | 0.51985708 | 0.524947 |
| METRNL       | 116.325443 | 115.6448 |
| METT10D      | 1.23785814 | 0.97067  |
| METT11D1     | 26.993888  | 31.14693 |
| METT5D1      | 0.6237134  | 0.427292 |
| METT5D2      | 0          | 0        |
| METTL1       | 0.01608671 | 0        |
| METTL10      | 1.23102946 | 1.231764 |
| METTL11A     | 24.3826692 | 33.08636 |
| METTL11B     | 0          | 0        |
| METTL12      | 0          | 0        |
| METTL13      | 3.78295506 | 3.287971 |
| METTL14      | 8.39029717 | 6.906402 |
| METTL2A      | 0.49245515 | 0.417207 |
| METTL2B      | 0.99248813 | 1.083697 |
| METTL3       | 18.4334615 | 17.66643 |
| METTL4       | 1.70537524 | 1.131195 |
| METTL5       | 3.71693817 | 3.12872  |
| METTL6       | 1.1358222  | 0.936671 |
| METTL7A      | 22.2533591 | 11.47049 |
| METTL7B      | 0          | 0        |
| METTL8       | 0.17058044 | 0.123316 |
| METTL9       | 6.31747034 | 5.554503 |
| MEX3A        | 0.00686654 | 0.011701 |
| MEX3B        | 2.00476964 | 2.741375 |
| MEX3C        | 5.51629947 | 4.510439 |
| MEX3D        | 0.65658051 | 0.846455 |
| MFAP1        | 16.0620076 | 16.66053 |
| MFAP2        | 0          | 0        |
| MFAP3        | 8.09531459 | 7.876551 |
| MFAP3L       | 0.02001459 | 0.060632 |
| MFAP4        | 0.4870733  | 1.132995 |
| MFAP5        | 0          | 0        |
| MFF          | 13.027132  | 12.39983 |
| MFGE8        | 0.13742046 | 0.192138 |
| MFHAS1       | 0.38009637 | 0.654511 |
| MFI2         | 0.6823898  | 0.599687 |
| MFN1         | 18.874402  | 16.3035  |
| MFN2         | 24.271063  | 25.7185  |
| MFNG         | 209.602083 | 246.8128 |
| MFRP         | 0.00536771 | 0        |
| MFRP-C1QTNF5 | 0          | 0        |
| MFSD1        | 89.1995531 | 80.3981  |
| MFSD10       | 31.2328479 | 32.99326 |

|           |            |          |
|-----------|------------|----------|
| MFSD11    | 6.35920541 | 7.356538 |
| MFSD2     | 0.94571003 | 0.759635 |
| MFSD3     | 0.97420275 | 0.891975 |
| MFSD4     | 0.18515458 | 0.12854  |
| MFSD5     | 22.0407589 | 26.64004 |
| MFSD6     | 0.93796557 | 1.100398 |
| MFSD6L    | 4.91190068 | 5.886216 |
| MFSD7     | 0.28168986 | 0.204803 |
| MFSD8     | 4.11717152 | 3.768014 |
| MFSD9     | 7.94083084 | 6.89367  |
| MGA       | 3.68620332 | 3.119624 |
| MGAM      | 5.24984744 | 6.118625 |
| MGAT1     | 12.4347374 | 9.74692  |
| MGAT2     | 11.7341666 | 11.85886 |
| MGAT3     | 47.2454404 | 51.8145  |
| MGAT4A    | 19.5328385 | 24.40373 |
| MGAT4B    | 46.3056029 | 46.4954  |
| MGAT4C    | 0          | 0        |
| MGAT5     | 2.8224835  | 2.841351 |
| MGAT5B    | 0.00946661 | 0.010754 |
| MGC102966 | 0          | 0        |
| MGC10997  | 0          | 0        |
| MGC12916  | 0          | 0        |
| MGC12982  | 0          | 0        |
| MGC13005  | 0          | 0        |
| MGC13053  | 0          | 0        |
| MGC14436  | 0          | 0        |
| MGC15705  | 0          | 0        |
| MGC15885  | 0          | 0        |
| MGC16025  | 0          | 0        |
| MGC16121  | 0          | 0        |
| MGC16142  | 0          | 0        |
| MGC16275  | 0          | 0        |
| MGC16384  | 0          | 0        |
| MGC16385  | 1.43389383 | 1.001746 |
| MGC16703  | 0          | 0        |
| MGC21881  | 0          | 0        |
| MGC23270  | 0          | 0        |
| MGC23284  | 0          | 0        |
| MGC24975  | 0.27940639 | 0.304185 |
| MGC26597  | 0          | 0        |
| MGC27345  | 0          | 0        |
| MGC27382  | 0          | 0        |
| MGC2752   | 0          | 0        |
| MGC2889   | 0          | 0        |
| MGC29506  | 0.05084723 | 0.057763 |
| MGC33407  | 0          | 0.033594 |

|          |            |          |
|----------|------------|----------|
| MGC34034 | 0          | 0        |
| MGC34796 | 0          | 0        |
| MGC34800 | 0          | 0        |
| MGC3771  | 0          | 0        |
| MGC39372 | 0.26147083 | 0.244617 |
| MGC39545 | 0          | 0        |
| MGC42105 | 0.01818014 | 0        |
| MGC4294  | 0          | 0        |
| MGC44328 | 0          | 0        |
| MGC4473  | 0          | 0        |
| MGC45800 | 0          | 0        |
| MGC45922 | 0          | 0        |
| MGC51338 | 0          | 0        |
| MGC52282 | 0          | 0        |
| MGC57346 | 0          | 0        |
| MGC72080 | 0          | 0        |
| MGC87042 | 0          | 0        |
| MGEA5    | 71.8062341 | 66.10877 |
| MGLL     | 4.24588346 | 3.971611 |
| MGMT     | 0.73131586 | 0.774142 |
| MGP      | 0.22265857 | 0.578157 |
| MGRN1    | 23.0391893 | 21.00694 |
| MGST1    | 0.03688655 | 0.020952 |
| MGST2    | 5.03977971 | 4.144857 |
| MGST3    | 4.72514979 | 3.170271 |
| MIA      | 0.47940494 | 0.972521 |
| MIA2     | 0          | 0.010471 |
| MIA3     | 23.4273385 | 23.58225 |
| MIAT     | 0          | 0        |
| MIB1     | 3.41085623 | 3.143453 |
| MIB2     | 14.4857012 | 16.83149 |
| MICA     | 5.42191685 | 6.526847 |
| MICAL1   | 156.031606 | 142.8323 |
| MICAL2   | 3.25661168 | 3.436618 |
| MICAL3   | 0.50656591 | 0.583549 |
| MICALCL  | 0.32463553 | 0.455104 |
| MICALL1  | 7.46902443 | 11.76643 |
| MICALL2  | 0.4952724  | 0.547223 |
| MICB     | 8.32376171 | 8.878758 |
| MICC     | 0          | 0        |
| MICD     | 0          | 0        |
| MICE     | 0          | 0        |
| MICG     | 0          | 0        |
| MID1     | 0.29496995 | 0.338694 |
| MID1IP1  | 26.2564333 | 31.06975 |
| MID2     | 0.00572507 | 0        |
| MIDN     | 73.59143   | 98.31119 |

|         |            |          |
|---------|------------|----------|
| MIER1   | 14.9162226 | 15.34159 |
| MIER2   | 4.44561668 | 4.254697 |
| MIER3   | 2.42957583 | 2.424791 |
| MIF     | 28.6334275 | 27.63179 |
| MIF4GD  | 6.17954132 | 5.362309 |
| MIIP    | 3.81315826 | 3.534635 |
| MIMT1   | 0          | 0        |
| MINA    | 0.01574342 | 0.017885 |
| MINK1   | 64.6508925 | 61.16942 |
| MINPP1  | 2.00135746 | 2.097393 |
| MIOS    | 8.99820931 | 7.844373 |
| MIOX    | 0.02926281 | 0        |
| MIP     | 0.01049168 | 0        |
| MIPEP   | 0.35903314 | 0.348179 |
| MIPOL1  | 0          | 0        |
| MIRHG1  | 0          | 0        |
| MIRHG2  | 0          | 0        |
| MIS12   | 7.38659709 | 6.24335  |
| MITD1   | 21.0022262 | 17.03455 |
| MITF    | 0          | 0.004632 |
| MIXL1   | 0.03007916 | 0        |
| MKI67   | 0.04144066 | 0.028246 |
| MKI67IP | 4.06473602 | 6.266749 |
| MKKS    | 3.46379822 | 2.867246 |
| MKL1    | 228.188057 | 276.647  |
| MKL2    | 0.09740714 | 0.063627 |
| MKLN1   | 5.54868373 | 5.272005 |
| MKNK1   | 34.1933928 | 37.31675 |
| MKNK2   | 46.1779594 | 49.09542 |
| MKRN1   | 102.698868 | 89.56916 |
| MKRN2   | 9.38427313 | 8.50265  |
| MKRN3   | 0.08521689 | 0.070406 |
| MKRNP1  | 0          | 0        |
| MKRNP2  | 0          | 0        |
| MKRNP3  | 0          | 0        |
| MKRNP4  | 0          | 0        |
| MKRNP5  | 0          | 0        |
| MKRNP6  | 0          | 0        |
| MKS1    | 0.35086076 | 0.219221 |
| MKX     | 0          | 0.013127 |
| MLANA   | 0.6208267  | 0.59556  |
| MLC1    | 0.02518607 | 0.074391 |
| MLEC    | 10.7428215 | 9.657123 |
| MLF1    | 0.12676771 | 0.123437 |
| MLF1IP  | 1.87592767 | 0.961816 |
| MLF2    | 179.251905 | 181.5337 |
| MLH1    | 10.8208815 | 8.810236 |

|                |            |          |
|----------------|------------|----------|
| MLH3           | 0.25030156 | 0.232922 |
| MLKL           | 57.1255839 | 53.86153 |
| MLL            | 19.5644199 | 19.64121 |
| MLL2           | 19.8159332 | 18.95532 |
| MLL3           | 20.6188396 | 20.35943 |
| MLL4           | 19.5506531 | 18.90728 |
| MLL5           | 35.0902143 | 36.41409 |
| MLLT1          | 6.65529899 | 7.984678 |
| MLLT10         | 4.49575032 | 3.917886 |
| MLLT11         | 0.45791963 | 0.486999 |
| MLLT3          | 0.26900685 | 0.298651 |
| MLLT4          | 0.22291227 | 0.192828 |
| MLLT6          | 17.9640428 | 22.62079 |
| MLN            | 0          | 0        |
| MLNR           | 0          | 0.019278 |
| MLPH           | 0          | 0.006359 |
| MLX            | 25.9164696 | 24.10886 |
| MLXIP (NC_0000 | 5.80360225 | 6.361651 |
| MLXIP (NC_0000 | 12.0192777 | 15.57808 |
| MLXIPL         | 0          | 0.014573 |
| MLYCD          | 3.83149539 | 3.47123  |
| MMAA           | 0.19104289 | 0.213009 |
| MMAB           | 0.10159619 | 0.098103 |
| MMACHC         | 0.12541425 | 0.067046 |
| MMADHC         | 28.2239829 | 28.38954 |
| MMD            | 1.59060528 | 4.201604 |
| MMD2           | 0.01740508 | 0.009886 |
| MME            | 0.00348563 | 0.011879 |
| MMEL1          | 0.13279156 | 0.142473 |
| MMGT1          | 6.19002342 | 4.354056 |
| MMP1           | 0          | 0        |
| MMP10          | 0          | 0        |
| MMP11          | 0.00929913 | 0        |
| MMP12          | 0          | 0        |
| MMP13          | 0          | 0        |
| MMP14          | 0.06536988 | 0.040506 |
| MMP15          | 0.274779   | 0.403647 |
| MMP16          | 0.00317363 | 0        |
| MMP17          | 1.44942066 | 1.80527  |
| MMP19          | 0.32953039 | 0.344991 |
| MMP2           | 0          | 0.01243  |
| MMP20          | 0          | 0        |
| MMP21          | 0.0219128  | 0.012447 |
| MMP23A         | 0          | 0        |
| MMP23B         | 0.5595451  | 0.674176 |
| MMP24          | 1.03840776 | 0.826856 |
| MMP25          | 292.64492  | 226.0685 |

|          |            |          |
|----------|------------|----------|
| MMP26    | 0          | 0        |
| MMP27    | 0          | 0        |
| MMP28    | 0.02215525 | 0.00839  |
| MMP3     | 0          | 0        |
| MMP7     | 0          | 0.021345 |
| MMP8     | 0.01376003 | 0.007816 |
| MMP9     | 0.32402051 | 0.214721 |
| MMRN1    | 0.0042313  | 0.009614 |
| MMRN2    | 0          | 0.011428 |
| MMS19    | 8.27095222 | 7.808344 |
| MN1      | 0.03617381 | 0.034772 |
| MNAT1    | 5.62412279 | 3.882201 |
| MND1     | 0          | 0        |
| MNDA     | 71.9679295 | 58.81726 |
| MNS1     | 0.01039314 | 0.023614 |
| MNT      | 26.8049087 | 32.52262 |
| MNX1     | 0.00966238 | 0.03293  |
| MOAP1    | 19.1028659 | 27.85773 |
| MOBKL1A  | 1.05459047 | 1.036692 |
| MOBKL1B  | 100.36471  | 85.78151 |
| MOBKL2A  | 105.669488 | 120.0852 |
| MOBKL2B  | 0.02577818 | 0.018303 |
| MOBKL2C  | 6.98026901 | 7.137527 |
| MOBKL3   | 7.35031895 | 7.678512 |
| MOBP     | 0.00683306 | 0        |
| MOCOS    | 0.10794083 | 0.105105 |
| MOCS1    | 0.01442726 | 0.01639  |
| MOCS1P1  | 0          | 0        |
| MOCS2    | 2.06522579 | 1.664995 |
| MOCS3    | 1.41993692 | 1.642223 |
| MOCS3P   | 0          | 0        |
| MOG      | 0          | 0        |
| MOGAT1   | 0          | 0        |
| MOGAT2   | 0          | 0        |
| MOGAT3   | 0.01491158 | 0        |
| MOGS     | 22.8337273 | 22.63104 |
| MON1A    | 1.30111914 | 1.103214 |
| MON1B    | 25.0691522 | 22.56537 |
| MON2     | 8.3866336  | 7.805982 |
| MORC1    | 0.00557997 | 0.012678 |
| MORC2    | 2.06158383 | 1.989089 |
| MORC3    | 23.8230964 | 28.35724 |
| MORC4    | 0.03318043 | 0.018847 |
| MORF4    | 0.23757436 | 0.438568 |
| MORF4L1  | 75.1414813 | 73.40092 |
| MORF4L2  | 13.6893602 | 11.15144 |
| MORF4LP1 | 0          | 0        |

|           |            |          |
|-----------|------------|----------|
| MORF4LP2  | 0          | 0        |
| MORF4LP3  | 0          | 0        |
| MORF4LP4  | 0          | 0        |
| MORG1     | 3.81128073 | 3.722562 |
| MORN1     | 0.12812511 | 0.218328 |
| MORN2     | 0.11349706 | 0.032234 |
| MORN3     | 0.50838451 | 0.412523 |
| MORN4     | 0.00816835 | 0.009279 |
| MORN5     | 0          | 0.03388  |
| MOS       | 0          | 0        |
| MOSC1     | 2.24032728 | 1.820933 |
| MOSC2     | 0.24013703 | 0.227333 |
| MOSPD1    | 4.06596731 | 3.727617 |
| MOSPD2    | 5.45027501 | 5.438363 |
| MOSPD3    | 1.65317113 | 1.587788 |
| MOV10     | 2.48649404 | 2.358293 |
| MOV10L1   | 0.04854489 | 0.07353  |
| MOXD1     | 0          | 0.00786  |
| MOXD2     | 0          | 0        |
| MPDU1     | 6.1350904  | 5.142445 |
| MPDZ      | 0.00848024 | 0        |
| MPEG1     | 1.5097977  | 0.714648 |
| MPG       | 11.2155252 | 10.80067 |
| MPHOSPH10 | 4.53869408 | 4.367233 |
| MPHOSPH6  | 3.15093516 | 1.800603 |
| MPHOSPH8  | 33.1893366 | 31.51446 |
| MPHOSPH9  | 2.35814429 | 1.885144 |
| MPI       | 0.39177635 | 0.431577 |
| MPL       | 0.0692192  | 0.104845 |
| MPN2      | 0.01691499 | 0.019216 |
| MPND      | 2.02300796 | 1.775138 |
| MPO       | 0.00653976 | 0.014859 |
| MPP1      | 168.065983 | 161.3797 |
| MPP2      | 0          | 0        |
| MPP3      | 0.00743996 | 0        |
| MPP4      | 0.01710767 | 0.009717 |
| MPP5      | 5.29459986 | 4.873329 |
| MPP6      | 0.03845511 | 0.010921 |
| MPP7      | 4.90604515 | 5.353164 |
| MPPE1     | 29.3200713 | 34.34655 |
| MPPED1    | 0.02514992 | 0.009524 |
| MPPED2    | 0.00583308 | 0.013253 |
| MPRIP     | 6.77854084 | 6.874161 |
| MPST      | 13.4958134 | 14.29555 |
| MPV17     | 8.87365011 | 7.732419 |
| MPV17L    | 0.04552908 | 0.020689 |
| MPV17L2   | 4.57610144 | 5.110711 |



|          |            |          |
|----------|------------|----------|
| MPZ      | 2.87149021 | 3.530842 |
| MPZL1    | 0.5022748  | 0.607405 |
| MPZL2    | 0.55724628 | 0.219129 |
| MPZL3    | 50.4137386 | 22.40292 |
| MR1      | 14.5828899 | 13.20016 |
| MRAP     | 0          | 0.019356 |
| MRAP2    | 0          | 0.010788 |
| MRAS     | 0.00461487 | 0        |
| MRC1     | 0.01219803 | 0.009238 |
| MRC1L1   | 0.02846206 | 0        |
| MRC2     | 0.02811343 | 0.011976 |
| MRE11A   | 4.80762141 | 4.542176 |
| MRE11B   | 0          | 0        |
| MREG     | 0.04580682 | 0.052037 |
| MRFAP1   | 83.2652448 | 80.81077 |
| MRFAP1L1 | 63.0363723 | 62.75842 |
| MRGPRD   | 0.04353071 | 0        |
| MRGPRE   | 0          | 0        |
| MRGPRF   | 0          | 0.020915 |
| MRGPRG   | 0          | 0        |
| MRGPRX1  | 0          | 0        |
| MRGPRX2  | 0          | 0        |
| MRGPRX3  | 0.01282815 | 0        |
| MRGPRX4  | 0          | 0.016541 |
| MRI1     | 3.11581757 | 2.961871 |
| MRM1     | 0.10323403 | 0.143337 |
| MRO      | 0.00788351 | 0        |
| MRP63    | 3.40138913 | 3.414726 |
| MRP63P1  | 0          | 0        |
| MRP63P10 | 0          | 0        |
| MRP63P2  | 0          | 0        |
| MRP63P3  | 0          | 0        |
| MRP63P6  | 0          | 0        |
| MRP63P7  | 0          | 0        |
| MRP63P8  | 0          | 0        |
| MRP63P9  | 0          | 0        |
| MRPL1    | 0.34036592 | 0.298784 |
| MRPL10   | 7.26548686 | 7.870452 |
| MRPL11   | 0.34917513 | 0.240834 |
| MRPL11P2 | 0          | 0        |
| MRPL11P3 | 0          | 0        |
| MRPL12   | 1.53484916 | 1.480877 |
| MRPL13   | 5.49310449 | 6.046591 |
| MRPL14   | 2.74007539 | 2.897033 |
| MRPL14P1 | 0          | 0        |
| MRPL15   | 1.851287   | 2.212343 |
| MRPL15P1 | 0          | 0        |

|          |            |          |
|----------|------------|----------|
| MRPL16   | 11.1708188 | 9.881403 |
| MRPL17   | 1.04860061 | 0.777326 |
| MRPL18   | 8.95244389 | 7.627589 |
| MRPL19   | 0.73334807 | 0.631687 |
| MRPL2    | 5.59149548 | 6.444893 |
| MRPL20   | 25.6434459 | 24.86267 |
| MRPL20P1 | 0          | 0        |
| MRPL21   | 5.63443284 | 4.716383 |
| MRPL22   | 1.72947097 | 1.482939 |
| MRPL22P1 | 0          | 0        |
| MRPL23   | 7.82074305 | 6.502415 |
| MRPL24   | 1.13405237 | 0.824513 |
| MRPL27   | 7.14801437 | 5.74194  |
| MRPL28   | 18.2321569 | 14.03984 |
| MRPL2P1  | 0          | 0        |
| MRPL3    | 1.27389484 | 1.185297 |
| MRPL30   | 4.73049486 | 4.462769 |
| MRPL30P1 | 0          | 0        |
| MRPL30P2 | 0          | 0        |
| MRPL32   | 9.09140009 | 6.778567 |
| MRPL32P1 | 0          | 0        |
| MRPL33   | 16.9257973 | 14.29418 |
| MRPL34   | 8.36234754 | 8.685494 |
| MRPL35   | 1.89234329 | 1.673617 |
| MRPL35P1 | 0          | 0        |
| MRPL35P2 | 0          | 0        |
| MRPL35P3 | 0          | 0        |
| MRPL35P4 | 0          | 0        |
| MRPL36   | 4.34888767 | 3.928984 |
| MRPL36P1 | 0          | 0        |
| MRPL37   | 2.43854142 | 1.981031 |
| MRPL38   | 5.15287476 | 4.974169 |
| MRPL39   | 2.5137031  | 2.019322 |
| MRPL3P1  | 0          | 0        |
| MRPL4    | 1.50430821 | 2.384537 |
| MRPL40   | 3.92870231 | 2.985639 |
| MRPL41   | 14.1329211 | 15.46205 |
| MRPL42   | 3.84057221 | 3.041199 |
| MRPL42P1 | 0          | 0        |
| MRPL42P2 | 0          | 0        |
| MRPL42P3 | 0          | 0        |
| MRPL42P4 | 0          | 0        |
| MRPL42P5 | 0          | 0        |
| MRPL43   | 4.68827489 | 4.190513 |
| MRPL44   | 6.37495733 | 6.148913 |
| MRPL45   | 1.07853997 | 0.887242 |
| MRPL45P1 | 0          | 0        |

|           |            |          |
|-----------|------------|----------|
| MRPL46    | 2.24971041 | 1.815268 |
| MRPL47    | 7.7377487  | 7.699007 |
| MRPL48    | 1.65199029 | 1.754824 |
| MRPL48P1  | 0          | 0        |
| MRPL49    | 18.3480988 | 18.37404 |
| MRPL49P1  | 0          | 0        |
| MRPL49P2  | 0          | 0        |
| MRPL50    | 5.14822012 | 5.193432 |
| MRPL50P1  | 0          | 0        |
| MRPL50P2  | 0          | 0        |
| MRPL50P3  | 0          | 0        |
| MRPL50P4  | 0          | 0        |
| MRPL51    | 19.8762361 | 15.52356 |
| MRPL51P1  | 0          | 0        |
| MRPL51P2  | 0          | 0        |
| MRPL52    | 4.91291361 | 3.928834 |
| MRPL53    | 6.31442569 | 6.436572 |
| MRPL53P1  | 0          | 0        |
| MRPL54    | 9.68582662 | 7.092689 |
| MRPL55    | 7.8903008  | 6.485361 |
| MRPL9     | 4.41011199 | 4.677192 |
| MRPL9P1   | 0          | 0        |
| MRPS10    | 4.4408643  | 4.710054 |
| MRPS10P1  | 0          | 0        |
| MRPS10P2  | 0          | 0        |
| MRPS10P5  | 0          | 0        |
| MRPS11    | 5.92784661 | 5.387302 |
| MRPS11P1  | 0          | 0        |
| MRPS12    | 2.17558183 | 1.876172 |
| MRPS14    | 2.50903579 | 1.856012 |
| MRPS15    | 2.63633684 | 2.400887 |
| MRPS15P1  | 0          | 0        |
| MRPS15P2  | 0          | 0        |
| MRPS16    | 5.38804039 | 4.642815 |
| MRPS16P   | 0          | 0        |
| MRPS16P1  | 0          | 0        |
| MRPS16P3  | 0          | 0        |
| MRPS17    | 1.11226154 | 0.815191 |
| MRPS17P1  | 0          | 0        |
| MRPS17P3  | 0          | 0        |
| MRPS17P5  | 0          | 0        |
| MRPS17P6  | 0          | 0        |
| MRPS17P7  | 0          | 0        |
| MRPS17P9  | 0          | 0        |
| MRPS18A   | 6.01007102 | 6.196609 |
| MRPS18AP1 | 0          | 0        |
| MRPS18B   | 5.59213496 | 5.309532 |

|           |            |          |
|-----------|------------|----------|
| MRPS18BP1 | 0          | 0        |
| MRPS18BP2 | 0          | 0        |
| MRPS18C   | 9.47171466 | 8.139261 |
| MRPS18CP2 | 0          | 0        |
| MRPS18CP3 | 0          | 0        |
| MRPS18CP4 | 0          | 0        |
| MRPS18CP5 | 0          | 0        |
| MRPS18CP6 | 0          | 0        |
| MRPS2     | 2.33304337 | 1.88859  |
| MRPS21    | 11.8449415 | 9.716839 |
| MRPS21P1  | 0          | 0        |
| MRPS21P2  | 0          | 0        |
| MRPS21P3  | 0          | 0        |
| MRPS21P4  | 0          | 0        |
| MRPS21P5  | 0          | 0        |
| MRPS21P6  | 0          | 0        |
| MRPS21P7  | 0          | 0        |
| MRPS21P8  | 0          | 0        |
| MRPS21P9  | 0          | 0        |
| MRPS22    | 11.2896479 | 9.953901 |
| MRPS22P1  | 0          | 0        |
| MRPS23    | 15.5536225 | 14.0983  |
| MRPS23P1  | 0          | 0        |
| MRPS24    | 6.01155296 | 4.632888 |
| MRPS24P1  | 0          | 0        |
| MRPS25    | 1.76362281 | 1.69487  |
| MRPS25P1  | 0          | 0        |
| MRPS26    | 2.61045976 | 2.091959 |
| MRPS27    | 1.49694913 | 1.211003 |
| MRPS28    | 1.04085797 | 0.743242 |
| MRPS29P1  | 0          | 0        |
| MRPS29P2  | 0          | 0        |
| MRPS30    | 2.97124438 | 2.78898  |
| MRPS31    | 7.22304126 | 6.814124 |
| MRPS31P1  | 0          | 0        |
| MRPS31P2  | 0          | 0        |
| MRPS33    | 1.31247476 | 0.906289 |
| MRPS33P1  | 0          | 0        |
| MRPS33P2  | 0          | 0        |
| MRPS33P3  | 0          | 0        |
| MRPS33P4  | 0          | 0        |
| MRPS34    | 7.90284125 | 6.667827 |
| MRPS35    | 0.95825905 | 0.986141 |
| MRPS35P1  | 0          | 0        |
| MRPS35P2  | 0          | 0        |
| MRPS35P3  | 0          | 0        |
| MRPS36    | 4.85686727 | 4.241449 |

|          |            |          |
|----------|------------|----------|
| MRPS36P1 | 0          | 0        |
| MRPS36P2 | 0          | 0        |
| MRPS36P3 | 0          | 0        |
| MRPS36P4 | 0          | 0        |
| MRPS36P5 | 0          | 0        |
| MRPS36P6 | 0          | 0        |
| MRPS5    | 6.89873894 | 5.593803 |
| MRPS5P3  | 0          | 0        |
| MRPS5P4  | 0          | 0        |
| MRPS6    | 7.96414052 | 4.632264 |
| MRPS6P1  | 0          | 0        |
| MRPS6P2  | 0          | 0        |
| MRPS6P4  | 0          | 0        |
| MRPS7    | 3.62556944 | 3.089028 |
| MRPS7P1  | 0          | 0        |
| MRPS7P2  | 0          | 0        |
| MRPS9    | 1.34112193 | 1.392479 |
| MRRF     | 3.6863373  | 3.587541 |
| MRRFP    | 0          | 0        |
| MRS2     | 3.00182443 | 2.646767 |
| MRS2P2   | 0          | 0        |
| MRT04    | 0.24975096 | 0.073557 |
| MRVI1    | 0.02524049 | 0.014337 |
| MS4A1    | 0.40365827 | 0.511729 |
| MS4A10   | 0.02747212 | 0.010403 |
| MS4A12   | 0          | 0.020467 |
| MS4A13   | 0          | 0        |
| MS4A14   | 0.0062706  | 0        |
| MS4A15   | 0.01073269 | 0.012193 |
| MS4A2    | 0.06618143 | 0.080966 |
| MS4A3    | 0.11433715 | 0.115457 |
| MS4A4A   | 0.03820472 | 0        |
| MS4A4E   | 0.05744626 | 0.06526  |
| MS4A5    | 0          | 0        |
| MS4A6A   | 0.09154716 | 0.103999 |
| MS4A6E   | 0          | 0        |
| MS4A7    | 0.02794992 | 0.039689 |
| MS4A8B   | 0          | 0        |
| MSC      | 0          | 0.023212 |
| MSGN1    | 0          | 0        |
| MSH2     | 1.74486848 | 1.44298  |
| MSH3     | 1.29246623 | 1.101197 |
| MSH4     | 0.11815671 | 0.111857 |
| MSH5     | 1.31542363 | 1.372521 |
| MSH6     | 5.66440293 | 5.08276  |
| MSI1     | 0.02138169 | 0.008097 |
| MSI2     | 15.2998976 | 13.62521 |

|        |            |          |
|--------|------------|----------|
| MSL1   | 55.0283092 | 57.35054 |
| MSL2   | 22.9868136 | 26.83945 |
| MSL3   | 20.4491731 | 18.44249 |
| MSL3L2 | 0          | 0        |
| MSLN   | 0          | 0.011505 |
| MSLNL  | 0          | 0.015108 |
| MSMB   | 0          | 0        |
| MSMP   | 8.04093758 | 8.35268  |
| MSN    | 176.888175 | 184.0898 |
| MSNL1  | 0          | 0        |
| MSR1   | 0          | 0        |
| MSRA   | 7.06886127 | 7.170378 |
| MSRB2  | 1.70663923 | 1.951958 |
| MSRB3  | 5.52687928 | 5.126078 |
| MST1   | 1.30788202 | 1.557502 |
| MST150 | 26.5398228 | 25.48148 |
| MST1R  | 0.01762392 | 0.030032 |
| MST4   | 31.10312   | 32.01149 |
| MSTN   | 0          | 0        |
| MSTO1  | 4.94612294 | 3.249941 |
| MSTO2P | 0          | 0        |
| MSTP2  | 0          | 0        |
| MSTP9  | 0          | 0        |
| MSX1   | 0.0108378  | 0.012312 |
| MSX2   | 0          | 0.021635 |
| MSX2P1 | 0          | 0        |
| MT1A   | 0          | 0.060316 |
| MT1B   | 0          | 0        |
| MT1CP  | 0          | 0        |
| MT1DP  | 0          | 0        |
| MT1E   | 0          | 0        |
| MT1F   | 0.52444136 | 0.324967 |
| MT1G   | 0.10618854 | 0.180948 |
| MT1H   | 0.05296053 | 0        |
| MT1IP  | 0          | 0        |
| MT1JP  | 0          | 0        |
| MT1L   | 0          | 0        |
| MT1M   | 0.14335453 | 0        |
| MT1P1  | 0          | 0        |
| MT1P2  | 0          | 0        |
| MT1P3  | 0          | 0        |
| MT1X   | 4.42364637 | 2.778713 |
| MT2A   | 16.4589703 | 12.37009 |
| MT2P1  | 0          | 0        |
| MT3    | 0          | 0        |
| MT4    | 0          | 0        |
| MTA1   | 8.26232689 | 8.219164 |

|         |            |          |
|---------|------------|----------|
| MTA2    | 30.7134737 | 32.12001 |
| MTA3    | 0.20379965 | 0.128622 |
| MTAP    | 0.20931353 | 0.16014  |
| MTBP    | 0.52236847 | 0.538762 |
| MTCH1   | 64.1378783 | 63.36347 |
| MTCH2   | 4.37627703 | 4.089916 |
| MTCO1P2 | 0          | 0        |
| MTCO2L  | 0          | 0        |
| MTCP1   | 0.10875171 | 0.082362 |
| MTCP1NB | 4.85836064 | 5.237345 |
| MTCYBP1 | 0          | 0        |
| MTDH    | 9.751673   | 9.19329  |
| MTERF   | 3.22718903 | 2.937327 |
| MTERFD1 | 2.55713485 | 1.800727 |
| MTERFD2 | 4.63270004 | 4.416353 |
| MTERFD3 | 1.68202648 | 1.628224 |
| MTF1    | 7.67482603 | 5.974273 |
| MTF2    | 9.06615531 | 9.113141 |
| MTFMT   | 0.87286516 | 0.756739 |
| MTFR1   | 1.32455595 | 1.287167 |
| MTG1    | 2.553262   | 2.308598 |
| MTHFD1  | 0.30489169 | 0.380998 |
| MTHFD1L | 0.1460904  | 0.21243  |
| MTHFD2  | 17.8542344 | 11.47315 |
| MTHFD2L | 0.24934742 | 0.141631 |
| MTHFR   | 4.27312849 | 4.266039 |
| MTHFS   | 41.9320088 | 46.82668 |
| MTHFSD  | 1.93280637 | 1.888773 |
| MTIF2   | 4.96025038 | 4.780188 |
| MTIF2P1 | 0          | 0        |
| MTIF3   | 24.6446168 | 21.24705 |
| MTL5    | 0.69219197 | 0.519547 |
| MTM1    | 11.6753002 | 9.016003 |
| MTMR1   | 15.5765995 | 11.77644 |
| MTMR10  | 12.862705  | 15.12258 |
| MTMR11  | 0.13570566 | 0.102776 |
| MTMR12  | 2.89012165 | 2.666181 |
| MTMR14  | 32.8052421 | 32.68539 |
| MTMR15  | 3.10052967 | 2.593523 |
| MTMR2   | 0.25463963 | 0.244387 |
| MTMR3   | 50.9163159 | 49.65052 |
| MTMR4   | 11.8562812 | 11.55943 |
| MTMR6   | 9.64601553 | 11.72275 |
| MTMR7   | 0.69902399 | 0.713451 |
| MTMR8   | 0.21511328 | 0.153864 |
| MTMR9   | 3.92911937 | 3.60244  |
| MTND1P1 | 0          | 0        |

|            |            |          |
|------------|------------|----------|
| MTND2P2    | 0          | 0        |
| MTND2P3    | 0          | 0        |
| MTND6P1    | 0          | 0        |
| MTNR1A     | 0          | 0        |
| MTNR1B     | 0          | 0        |
| MTO1       | 2.352626   | 1.837905 |
| MTP18      | 0.03597148 | 0.081728 |
| MTPAP      | 2.71234252 | 2.027259 |
| MTPN       | 22.7034598 | 21.32687 |
| MTPN-LUZP6 | 0          | 0        |
| MTR        | 4.92675401 | 3.952196 |
| MTRF1      | 2.5435428  | 1.933661 |
| MTRF1L     | 7.32470916 | 6.621066 |
| MTRR       | 7.71565933 | 5.674523 |
| MTSS1      | 0.26019372 | 0.243142 |
| MTSS1L     | 0.28304143 | 0.196763 |
| MTTP       | 0.00514067 | 0        |
| MTUS1      | 0.00567485 | 0.003223 |
| MTVR2      | 0          | 0        |
| MTX1       | 3.26321327 | 2.61675  |
| MTX1P      | 0          | 0        |
| MTX2       | 0.83941435 | 1.15036  |
| MTX3       | 1.58206738 | 1.213221 |
| MUC1       | 0.03429907 | 0.058446 |
| MUC12      | 0.00125524 | 0        |
| MUC13      | 0          | 0.008349 |
| MUC15      | 0          | 0        |
| MUC16      | 0.00335899 | 0.002726 |
| MUC17      | 0.00439554 | 0        |
| MUC19      | 0.32390632 | 0.227271 |
| MUC2       | 0.00731485 | 0.00277  |
| MUC20      | 0.16764594 | 0.247942 |
| MUC21      | 0          | 0        |
| MUC3A      | 0.00729413 | 0        |
| MUC4       | 0.00125704 | 0.002856 |
| MUC5AC     | 0.0448684  | 0.057343 |
| MUC5B      | 0          | 0        |
| MUC6       | 0.0420349  | 0.044768 |
| MUC7       | 0          | 0        |
| MUCL1      | 0          | 0        |
| MUDENG     | 13.9466896 | 13.30466 |
| MUL1       | 10.0079891 | 9.775598 |
| MUM1       | 10.340915  | 17.28627 |
| MUM1L1     | 0          | 0        |
| MUPCDH     | 0.22753356 | 0.391216 |
| MURC       | 0.0159767  | 0.0363   |
| MUS81      | 28.2527885 | 29.40854 |



|         |            |          |
|---------|------------|----------|
| MUSK    | 0.00773559 | 0.008788 |
| MUSTN1  | 7.21632122 | 6.342374 |
| MUT     | 5.39493786 | 4.433038 |
| MUTED   | 7.39128375 | 7.133967 |
| MUTYH   | 4.38480364 | 4.723171 |
| MVD     | 3.59597582 | 3.57944  |
| MVK     | 0.77082738 | 0.645232 |
| MVP     | 31.2041433 | 30.12187 |
| MX1     | 15.4030233 | 13.8474  |
| MX2     | 30.2208067 | 25.78882 |
| MXD1    | 267.195189 | 275.801  |
| MXD3    | 5.30123024 | 6.725007 |
| MXD4    | 21.3986936 | 19.01693 |
| MXI1    | 17.6042602 | 16.12478 |
| MXRA5   | 0.00214654 | 0        |
| MXRA5P1 | 0          | 0        |
| MXRA7   | 3.00053491 | 4.892279 |
| MXRA8   | 0.1295005  | 0.105082 |
| MYADM   | 80.1731145 | 77.73179 |
| MYADML  | 0          | 0        |
| MYADML2 | 0          | 0        |
| MYB     | 8.59191746 | 2.318375 |
| MYBBP1A | 0.27616459 | 0.376473 |
| MYBL1   | 0.06889565 | 0.078267 |
| MYBL2   | 0.18599629 | 0.193687 |
| MYBPC1  | 0.05796457 | 0.041904 |
| MYBPC2  | 0          | 0.026554 |
| MYBPC3  | 5.73871376 | 7.176294 |
| MYBPH   | 0          | 0.013225 |
| MYBPHL  | 0.01532459 | 0.017409 |
| MYC     | 0.09804097 | 0.091126 |
| MYCBP   | 20.381801  | 19.98993 |
| MYCBP2  | 8.29169991 | 7.189037 |
| MYCBPAP | 0.00659101 | 0.022462 |
| MYCL1   | 0.02975082 | 0.004828 |
| MYCL2   | 0          | 0        |
| MYCL3   | 0          | 0        |
| MYCN    | 0.03228458 | 0        |
| MYCNOS  | 0          | 0        |
| MYCT1   | 3.34886224 | 1.02757  |
| MYD88   | 53.6404145 | 34.52027 |
| MYEF2   | 0.0661541  | 0.097256 |
| MYEOV   | 0          | 0        |
| MYEOV2  | 6.48211785 | 6.199429 |
| MYF5    | 0          | 0        |
| MYF6    | 0          | 0        |
| MYH1    | 0.00349084 | 0        |

|        |            |          |
|--------|------------|----------|
| MYH10  | 0.80304125 | 0.658337 |
| MYH11  | 1.88385996 | 2.325891 |
| MYH13  | 0.0035089  | 0        |
| MYH14  | 0.00925818 | 0.010517 |
| MYH15  | 0.01783319 | 0.006753 |
| MYH16  | 0          | 0        |
| MYH2   | 0          | 0        |
| MYH3   | 7.2386862  | 5.195517 |
| MYH4   | 0.0069898  | 0        |
| MYH6   | 0.00708281 | 0        |
| MYH7   | 0          | 0.003961 |
| MYH7B  | 0.46136042 | 0.554496 |
| MYH8   | 0          | 0.003956 |
| MYH9   | 710.531508 | 811.5304 |
| MYL1   | 0          | 0        |
| MYL10  | 0          | 0.035074 |
| MYL12A | 328.860811 | 324.752  |
| MYL12B | 379.973065 | 457.0612 |
| MYL2   | 0          | 0        |
| MYL3   | 0.02263222 | 0        |
| MYL4   | 0.06646575 | 0.025169 |
| MYL5   | 0.41350878 | 0.325213 |
| MYL6   | 936.882055 | 829.2948 |
| MYL6B  | 0.82262515 | 0.659658 |
| MYL6P  | 0          | 0        |
| MYL7   | 0          | 0        |
| MYL8P  | 0          | 0        |
| MYL9   | 1.41704    | 1.227457 |
| MYLIP  | 42.1464805 | 40.74153 |
| MYLK   | 0.02312452 | 0.017513 |
| MYLK2  | 0.00752787 | 0        |
| MYLK3  | 0.03417471 | 0.050769 |
| MYLK4  | 0.10220647 | 0.087081 |
| MYLKP  | 0          | 0        |
| MYLPF  | 0.89879277 | 0.729316 |
| MYNN   | 7.09789412 | 5.876011 |
| MYO10  | 0.0404687  | 0.041794 |
| MYO15A | 0.05848739 | 0.062416 |
| MYO15B | 0          | 0        |
| MYO16  | 0.0244694  | 0.024323 |
| MYO18A | 45.355712  | 66.40142 |
| MYO18B | 0.01227398 | 0.002789 |
| MYO19  | 2.59810924 | 2.211954 |
| MYO1A  | 0.02327742 | 0.006611 |
| MYO1B  | 0.00412666 | 0.004688 |
| MYO1C  | 0.61899895 | 0.843831 |
| MYO1D  | 0.13795084 | 0.106013 |

|          |            |          |
|----------|------------|----------|
| MYO1E    | 0.01783697 | 0.030395 |
| MYO1F    | 415.924668 | 493.9169 |
| MYO1G    | 76.2995123 | 81.98442 |
| MYO1H    | 0.06075089 | 0.150576 |
| MYO3A    | 0.00727017 | 0.00413  |
| MYO3B    | 0.00760547 | 0        |
| MYO5A    | 10.544483  | 9.378202 |
| MYO5B    | 0.01105665 | 0.017585 |
| MYO5C    | 0.0302697  | 0.013755 |
| MYO6     | 0.04611883 | 0.035847 |
| MYO7A    | 0.00544416 | 0.006185 |
| MYO7B    | 0.10958847 | 0.074697 |
| MYO9A    | 1.07425166 | 0.920772 |
| MYO9B    | 202.643591 | 184.9772 |
| MYOC     | 0          | 0.01168  |
| MYOCD    | 0          | 0.008479 |
| MYOD1    | 0.01164193 | 0.013225 |
| MYOF     | 0.01229012 | 0.017452 |
| MYOG     | 0.01205581 | 0        |
| MYOM1    | 3.76132994 | 2.904449 |
| MYOM2    | 0.02097918 | 0.009533 |
| MYOM3    | 0          | 0.004118 |
| MYOT     | 0.04627053 | 0.010513 |
| MYOZ1    | 0          | 0.030999 |
| MYOZ2    | 0          | 0.009222 |
| MYOZ3    | 0          | 0.006235 |
| MYPN     | 0          | 0        |
| MYPOP    | 8.53492502 | 10.68311 |
| MYRIP    | 0.00863463 | 0.019618 |
| MYSM1    | 11.1014397 | 9.447027 |
| MYST1    | 44.7078368 | 46.68933 |
| MYST2    | 15.5502307 | 13.76954 |
| MYST3    | 41.9487621 | 45.56049 |
| MYST4    | 3.58045402 | 3.413755 |
| MYT1     | 0.01139584 | 0.017261 |
| MYT1L    | 0.00589275 | 0.006694 |
| MZF1     | 3.13832396 | 2.444932 |
| N4BP1    | 19.4453244 | 21.04485 |
| N4BP2    | 1.98788309 | 2.030689 |
| N4BP2L1  | 3.21182848 | 2.690524 |
| N4BP2L2  | 22.18123   | 20.26305 |
| N4BP3    | 0.34767125 | 0.79391  |
| N6AMT1   | 0.20744417 | 0.073644 |
| N6AMT2   | 0.02411162 | 0.054782 |
| NAAA     | 11.2512602 | 10.86111 |
| NAALAD2  | 0.21051646 | 0.201783 |
| NAALADL1 | 0.32081822 | 0.266674 |

|          |            |          |
|----------|------------|----------|
| NAALADL2 | 0          | 0        |
| NAB1     | 6.44544717 | 6.728877 |
| NAB2     | 0.6049339  | 0.59911  |
| NACA     | 16.6431648 | 16.3766  |
| NACA2    | 0.16383375 | 0.124078 |
| NACA3P   | 0          | 0        |
| NACAD    | 0.03970373 | 0.015035 |
| NACAP1   | 0          | 0        |
| NACC1    | 8.34271649 | 8.201033 |
| NACC2    | 5.86283267 | 8.038258 |
| NADK     | 151.044418 | 118.7537 |
| NADSYN1  | 55.7996556 | 57.56773 |
| NAE1     | 7.12946858 | 5.486951 |
| NAF1     | 0.62667293 | 1.021437 |
| NAGA     | 3.21643549 | 2.859033 |
| NAGK     | 44.9893994 | 36.19186 |
| NAGLU    | 2.29669443 | 2.737819 |
| NAGPA    | 2.19510945 | 1.962417 |
| NAGS     | 0.15221041 | 0.172913 |
| NAIF1    | 0.38362876 | 0.196817 |
| NAIP     | 2.56116839 | 2.27512  |
| NALCN    | 0          | 0        |
| NAMPT    | 95.7290385 | 42.82847 |
| NAMPTL   | 0          | 0        |
| NANOG    | 0.01002161 | 0        |
| NANOGP1  | 0          | 0        |
| NANOGP10 | 0          | 0        |
| NANOGP11 | 0          | 0        |
| NANOGP2  | 0          | 0        |
| NANOGP3  | 0          | 0        |
| NANOGP4  | 0          | 0        |
| NANOGP5  | 0          | 0        |
| NANOGP6  | 0          | 0        |
| NANOGP7  | 0          | 0        |
| NANOGP8  | 0          | 0        |
| NANOGP9  | 0          | 0        |
| NANOS1   | 0.32717178 | 0.299403 |
| NANOS2   | 0          | 0        |
| NANOS3   | 0.22225508 | 0.605965 |
| NANP     | 0.29317089 | 0.282776 |
| NANS     | 3.57769745 | 4.045059 |
| NAP1L1   | 29.9482763 | 24.19736 |
| NAP1L1P2 | 0          | 0        |
| NAP1L2   | 0.01661425 | 0.009437 |
| NAP1L3   | 0.01569055 | 0.008912 |
| NAP1L4   | 24.1732856 | 20.87813 |
| NAP1L5   | 0          | 0        |

|           |            |          |
|-----------|------------|----------|
| NAP1L6    | 0          | 0        |
| NAP5      | 0          | 0        |
| NAPA      | 111.872567 | 110.9452 |
| NAPB      | 4.95895819 | 5.04728  |
| NAPEPLD   | 0.66255471 | 0.547803 |
| NAPG      | 8.13281308 | 8.846813 |
| NAPRT1    | 17.1303729 | 26.77387 |
| NAPSA     | 0.43802773 | 0.2917   |
| NAPSB     | 0          | 0        |
| NARF      | 102.160509 | 121.6949 |
| NARFL     | 3.60635156 | 3.42357  |
| NARG1     | 1.41203609 | 1.191245 |
| NARG1L    | 5.92939974 | 5.607175 |
| NARG2     | 2.59280333 | 2.554504 |
| NARS      | 34.0818562 | 41.06606 |
| NARS2     | 0.65140444 | 0.569235 |
| NARSP     | 0          | 0        |
| NASP      | 9.72166395 | 8.420661 |
| NASPP1    | 0          | 0        |
| NAT1      | 5.04962303 | 4.662964 |
| NAT10     | 1.90950172 | 1.826404 |
| NAT11     | 6.51232623 | 6.392192 |
| NAT12     | 3.06335548 | 3.319897 |
| NAT13     | 11.876725  | 11.91584 |
| NAT14     | 0.48039599 | 0.472972 |
| NAT15     | 72.5846806 | 74.70502 |
| NAT2      | 0          | 0.018136 |
| NAT5      | 7.58770127 | 7.231989 |
| NAT6      | 0.29910513 | 0.559651 |
| NAT8      | 0.0195949  | 0.02226  |
| NAT8B     | 0.02527083 | 0.086124 |
| NAT8L     | 0.26034782 | 0.295759 |
| NAT9      | 3.31919891 | 2.292971 |
| NAV1      | 0.08889178 | 0.091802 |
| NAV2      | 0.00740981 | 0.012626 |
| NAV3      | 0.00430935 | 0.002448 |
| NBAS      | 1.39167942 | 1.53833  |
| NBEA      | 0.00779293 | 0        |
| NBEAL1    | 0.21819178 | 0.192494 |
| NBEAL2    | 104.057166 | 129.911  |
| NBL1      | 0.086524   | 0.458699 |
| NBLA00301 | 0          | 0        |
| NBN       | 10.1372944 | 8.513044 |
| NBPF1     | 8.50137624 | 6.230414 |
| NBPF10    | 5.4382494  | 3.647717 |
| NBPF11    | 0.1171843  | 0.154143 |
| NBPF13P   | 0          | 0        |

|                |            |          |
|----------------|------------|----------|
| NBPF14         | 31.3869606 | 24.24122 |
| NBPF15         | 10.2145451 | 8.716282 |
| NBPF16         | 0.81774323 | 1.053663 |
| NBPF17P        | 0          | 0        |
| NBPF18P        | 0          | 0        |
| NBPF20 (NC_000 | 2.00608662 | 1.643471 |
| NBPF20 (NC_000 | 1.39504566 | 1.256515 |
| NBPF21P        | 0          | 0        |
| NBPF22P        | 0          | 0        |
| NBPF2P         | 0          | 0        |
| NBPF3          | 1.10542101 | 0.849868 |
| NBPF4          | 0.04360809 | 0.042462 |
| NBPF6          | 0.01892469 | 0        |
| NBPF7          | 0.0891376  | 0.025315 |
| NBPF8          | 0.01088737 | 0.004123 |
| NBPF9          | 6.4010452  | 4.989334 |
| NBR1           | 29.8866293 | 27.48605 |
| NBR2           | 0          | 0        |
| NCALD          | 0.01874333 | 0.005323 |
| NCAM1          | 0.00748854 | 0.01985  |
| NCAM2          | 0.02273623 | 0.038743 |
| NCAN           | 0.00328213 | 0.007457 |
| NCAPD2         | 12.2319653 | 11.35114 |
| NCAPD3         | 3.015944   | 2.399164 |
| NCAPG          | 0.12171611 | 0.13315  |
| NCAPG2         | 0.46520951 | 0.419144 |
| NCAPH          | 0.10758234 | 0.138156 |
| NCAPH2         | 11.6760559 | 11.00401 |
| NCBP1          | 7.28325904 | 7.38614  |
| NCBP2          | 15.0568499 | 12.90016 |
| NCBP2L         | 0          | 0        |
| NCCRP1         | 0          | 0        |
| NCDN           | 0.5334362  | 0.457717 |
| NCF1           | 1037.53541 | 1036.952 |
| NCF1B          | 0          | 0        |
| NCF1C          | 0          | 0        |
| NCF2           | 657.693344 | 559.5885 |
| NCF4           | 426.3932   | 365.4582 |
| NCK1           | 10.7103959 | 10.03324 |
| NCK2           | 13.2062721 | 11.85622 |
| NCKAP1         | 0.47207133 | 0.68582  |
| NCKAP1L        | 95.8642755 | 91.44813 |
| NCKIPSD        | 0.56058088 | 0.548156 |
| NCL            | 46.9877842 | 41.82751 |
| NCLN           | 20.0171514 | 24.50575 |
| NCOA1          | 25.6193295 | 25.2113  |
| NCOA2          | 10.7021906 | 10.2725  |

|               |            |          |
|---------------|------------|----------|
| NCOA3         | 17.5409818 | 16.68195 |
| NCOA4         | 96.7309445 | 84.44047 |
| NCOA4P        | 0          | 0        |
| NCOA5         | 7.68548246 | 7.599469 |
| NCOA6         | 19.1198917 | 19.59648 |
| NCOA7         | 2.14685781 | 2.202422 |
| NCOR1         | 42.2180145 | 43.39455 |
| NCOR2         | 48.3906004 | 71.10426 |
| NCR1          | 0.05470598 | 0.062147 |
| NCR2          | 0.0223436  | 0.025383 |
| NCR3          | 0.01717756 | 0.019514 |
| NCRNA00028    | 0          | 0        |
| NCRNA00032    | 0          | 0        |
| NCRNA00051    | 0          | 0        |
| NCRNA00052    | 0          | 0        |
| NCRNA00081    | 0          | 0        |
| NCRNA00083    | 0          | 0        |
| NCRNA00084    | 0          | 0        |
| NCRNA00085    | 0          | 0        |
| NCRNA00086    | 0          | 0        |
| NCRNA00087    | 0          | 0        |
| NCRNA00092    | 0          | 0        |
| NCRNA00093    | 0          | 0        |
| NCRNA00094    | 0          | 0        |
| NCRNA00095    | 0          | 0        |
| NCRNA00099    | 0          | 0        |
| NCRNA00105    | 0          | 0        |
| NCRNA00107 (N | 0          | 0        |
| NCRNA00107 (N | 0          | 0        |
| NCRNA00108 (N | 0          | 0        |
| NCRNA00108 (N | 0          | 0        |
| NCRNA00110    | 0          | 0        |
| NCRNA00111    | 0          | 0        |
| NCRNA00112    | 0          | 0        |
| NCRNA00113    | 0          | 0        |
| NCRNA00114    | 0          | 0        |
| NCRNA00115    | 0          | 0        |
| NCRNA00116    | 0          | 0        |
| NCRNA00117    | 0          | 0        |
| NCRNA00119    | 0          | 0        |
| NCRNA00120    | 0          | 0        |
| NCRNA00152    | 0          | 0        |
| NCRNA00153    | 3.55248935 | 3.28996  |
| NCRNA00157    | 0          | 0        |
| NCRNA00158    | 0          | 0        |
| NCRNA00159    | 0          | 0        |
| NCRNA00160    | 0          | 0        |

|             |            |          |
|-------------|------------|----------|
| NCRNA00161  | 0          | 0        |
| NCRNA00162  | 0          | 0        |
| NCRNA00164  | 0          | 0        |
| NCRNA00167  | 0          | 0        |
| NCRNA00168  | 0          | 0        |
| NCRNA00169  | 0          | 0        |
| NCRNA00171  | 0          | 0        |
| NCRNA00174  | 0          | 0        |
| NCRNA00185  | 0          | 0        |
| NCRNA00230A | 0          | 0        |
| NCRNA00230B | 0          | 0        |
| NCRNA00265B | 0          | 0        |
| NCRNA00265C | 0          | 0        |
| NCRNA00268B | 0          | 0        |
| NCSTN       | 47.8460598 | 46.06123 |
| ND1         | 0          | 0        |
| ND2         | 0          | 0        |
| ND3         | 0          | 0        |
| ND4         | 0          | 0        |
| ND4L        | 0          | 0        |
| ND5         | 0          | 0        |
| ND6         | 0          | 0        |
| NDC80       | 0.09680171 | 0.098971 |
| NDE1        | 18.9989195 | 20.88531 |
| NDEL1       | 40.9339638 | 31.41734 |
| NDFIP1      | 9.07181364 | 9.615134 |
| NDFIP2      | 28.8978657 | 37.53115 |
| NDN         | 0.02216693 | 0        |
| NDNL2       | 0.20265379 | 0.402881 |
| NDOR1       | 13.9206056 | 14.8982  |
| NDP         | 0          | 0.011919 |
| NDRG1       | 1.0397806  | 1.593256 |
| NDRG2       | 0.20078761 | 0.369301 |
| NDRG3       | 2.52530966 | 2.328879 |
| NDRG4       | 0.00535814 | 0.006087 |
| NDST1       | 51.5421719 | 55.74481 |
| NDST2       | 22.840581  | 30.66929 |
| NDST3       | 0.01060635 | 0        |
| NDST4       | 0          | 0        |
| NDUFA1      | 64.0710188 | 60.79399 |
| NDUFA10     | 13.0255161 | 11.57497 |
| NDUFA11     | 17.8675841 | 17.60742 |
| NDUFA12     | 10.2323277 | 8.678256 |
| NDUFA13     | 25.1292577 | 23.26644 |
| NDUFA2      | 31.2509612 | 29.30613 |
| NDUFA3      | 27.2616579 | 27.12377 |
| NDUFA4      | 57.4556128 | 62.42633 |



|          |            |          |
|----------|------------|----------|
| NDUFA4L2 | 0.01769809 | 0.020105 |
| NDUFA4P1 | 0          | 0        |
| NDUFA5   | 8.11170833 | 7.689464 |
| NDUFA6   | 19.9421002 | 18.17608 |
| NDUFA7   | 7.50623965 | 7.098565 |
| NDUFA8   | 8.94323912 | 8.461668 |
| NDUFA9   | 5.38473803 | 4.385524 |
| NDUFA9P1 | 0          | 0        |
| NDUFAB1  | 8.66861471 | 8.522723 |
| NDUFAF1  | 3.96840495 | 3.049163 |
| NDUFAF2  | 0.87727389 | 0.597958 |
| NDUFAF3  | 8.47030394 | 8.71537  |
| NDUFAF4  | 0.21630999 | 0.262114 |
| NDUFB1   | 24.5796131 | 23.77137 |
| NDUFB10  | 24.9468418 | 22.00034 |
| NDUFB11  | 18.4402493 | 16.32802 |
| NDUFB11P | 0          | 0        |
| NDUFB1P  | 0          | 0        |
| NDUFB2   | 14.3566906 | 12.54571 |
| NDUFB3   | 8.10380306 | 7.402802 |
| NDUFB3P1 | 0          | 0        |
| NDUFB3P2 | 0          | 0        |
| NDUFB3P3 | 0          | 0        |
| NDUFB3P4 | 0          | 0        |
| NDUFB3P5 | 0          | 0        |
| NDUFB4   | 32.6351437 | 31.90724 |
| NDUFB5   | 6.67092654 | 5.796481 |
| NDUFB6   | 10.2931435 | 9.892093 |
| NDUFB7   | 4.68520266 | 3.738921 |
| NDUFB8   | 28.043991  | 23.85029 |
| NDUFB8P1 | 0          | 0        |
| NDUFB8P2 | 0          | 0        |
| NDUFB8P3 | 0          | 0        |
| NDUFB9   | 20.7036639 | 19.43364 |
| NDUFC1   | 21.5356545 | 20.23277 |
| NDUFC2   | 5.92825877 | 5.314244 |
| NDUFS1   | 9.61122826 | 8.50693  |
| NDUFS2   | 26.4927407 | 24.10735 |
| NDUFS3   | 17.3316917 | 18.37109 |
| NDUFS4   | 0.83976914 | 0.247331 |
| NDUFS5   | 30.2007689 | 41.31984 |
| NDUFS6   | 30.9660128 | 26.3498  |
| NDUFS7   | 11.0209114 | 11.5779  |
| NDUFS8   | 10.96283   | 9.776651 |
| NDUFV1   | 16.4103288 | 14.95199 |
| NDUFV2   | 18.7768883 | 14.51041 |
| NDUFV2P1 | 0          | 0        |

|        |            |          |
|--------|------------|----------|
| NDUFV3 | 4.59990809 | 4.306048 |
| NEB    | 0.0805451  | 0.076443 |
| NEBL   | 0.00635398 | 0.004812 |
| NECAB1 | 0.02863372 | 0.004647 |
| NECAB2 | 0          | 0.014872 |
| NECAB3 | 7.89867755 | 8.258461 |
| NECAP1 | 46.2687067 | 38.33413 |
| NECAP2 | 27.4581532 | 25.31913 |
| NEDD1  | 4.66887535 | 4.464615 |
| NEDD4  | 0.01105433 | 0.012558 |
| NEDD4L | 0.20315385 | 0.255602 |
| NEDD8  | 64.1861304 | 55.45167 |
| NEDD9  | 45.4092929 | 52.25295 |
| NEFH   | 0.10735858 | 0.083447 |
| NEFL   | 0.00585827 | 0.01331  |
| NEFLP1 | 0          | 0        |
| NEFM   | 0          | 0        |
| NEGR1  | 0.00370883 | 0        |
| NEIL1  | 0.6556525  | 0.631213 |
| NEIL2  | 0.15285591 | 0.095506 |
| NEIL3  | 0.00875326 | 0.019888 |
| NEK1   | 1.42181842 | 1.389426 |
| NEK10  | 0.00796716 | 0.009051 |
| NEK11  | 0.05131258 | 0.058292 |
| NEK2   | 0.09871047 | 0.078496 |
| NEK2P  | 0          | 0        |
| NEK3   | 1.20938554 | 1.141807 |
| NEK4   | 3.64030811 | 3.298052 |
| NEK5   | 0          | 0        |
| NEK6   | 32.4582843 | 38.70377 |
| NEK7   | 15.1103673 | 14.30564 |
| NEK8   | 1.38305186 | 1.32045  |
| NEK9   | 20.2742908 | 21.29537 |
| NELF   | 3.29583155 | 3.443017 |
| NELL1  | 0          | 0        |
| NELL2  | 0.06455581 | 0.073336 |
| NENF   | 2.57000884 | 1.837316 |
| NEO1   | 0.01493913 | 0.010183 |
| NES    | 0.0037829  | 0        |
| NET1   | 1.6824843  | 1.521262 |
| NETO1  | 0          | 0        |
| NETO2  | 0.58131903 | 0.73885  |
| NEU1   | 18.6192453 | 18.28001 |
| NEU2   | 0          | 0        |
| NEU3   | 2.41776004 | 2.068652 |
| NEU4   | 0.04566753 | 0.041503 |
| NEURL  | 0.00487261 | 0        |

|          |            |          |
|----------|------------|----------|
| NEURL1B  | 0.0032765  | 0.011166 |
| NEURL2   | 0.78490116 | 0.910632 |
| NEURL3   | 0          | 0        |
| NEURL4   | 7.77049536 | 8.412974 |
| NEUROD1  | 0          | 0.009082 |
| NEUROD2  | 0.01386895 | 0.007878 |
| NEUROD4  | 0          | 0.006038 |
| NEUROD6  | 0          | 0        |
| NEUROG1  | 0          | 0.01432  |
| NEUROG2  | 0          | 0.010444 |
| NEUROG3  | 0          | 0        |
| NEXN     | 0.03100167 | 0.056349 |
| NF1      | 1.81444945 | 1.524235 |
| NF1L1    | 0          | 0        |
| NF1L2    | 0          | 0        |
| NF1L4    | 0          | 0        |
| NF1L5    | 0          | 0        |
| NF1L6    | 0          | 0        |
| NF1L7    | 0          | 0        |
| NF1P1    | 0          | 0        |
| NF2      | 2.05243664 | 1.755599 |
| NFAM1    | 3.34979849 | 5.203161 |
| NFASC    | 0.01668843 | 0.00237  |
| NFAT5    | 10.411376  | 10.3879  |
| NFATC1   | 7.54074586 | 8.475495 |
| NFATC2   | 15.478034  | 14.824   |
| NFATC2IP | 22.0719879 | 22.02457 |
| NFATC3   | 23.0044032 | 23.87986 |
| NFATC4   | 0.00352537 | 0.00801  |
| NFE2     | 22.8178391 | 25.71651 |
| NFE2L1   | 21.0339585 | 20.05781 |
| NFE2L2   | 33.7979048 | 34.79789 |
| NFE2L3   | 5.16774286 | 5.895798 |
| NF-E4    | 0.04371171 | 0        |
| NFIA     | 0.16571896 | 0.221622 |
| NFIB     | 0.0051539  | 0.002927 |
| NFIC     | 5.20362182 | 5.355706 |
| NFIL3    | 40.8607391 | 33.04966 |
| NFIX     | 0.88611061 | 1.332186 |
| NFKB1    | 32.5081984 | 49.01564 |
| NFKB2    | 17.7723078 | 15.33127 |
| NFKBIA   | 49.8596872 | 71.91445 |
| NFKBIB   | 18.7945266 | 16.98989 |
| NFKBID   | 17.7695    | 22.45252 |
| NFKBIE   | 21.6688804 | 40.6815  |
| NFKBIL1  | 2.47433845 | 2.76627  |
| NFKBIL2  | 0.44705023 | 0.407343 |

|          |            |          |
|----------|------------|----------|
| NFKBIZ   | 5.14669454 | 4.38075  |
| NFRKB    | 6.07103414 | 5.315419 |
| NFS1     | 1.89768909 | 1.783072 |
| NFU1     | 7.4657743  | 6.639251 |
| NFX1     | 12.1176526 | 11.54475 |
| NFXL1    | 1.79346975 | 1.358273 |
| NFYA     | 6.09900258 | 5.891583 |
| NFYAP    | 0          | 0        |
| NFYB     | 2.88026504 | 2.627225 |
| NFYC     | 16.3447539 | 14.9356  |
| NGB      | 0          | 0        |
| NGDN     | 7.65279679 | 7.550582 |
| NGEF     | 0.00610669 | 0.013875 |
| NGF      | 0.02004321 | 0        |
| NGFR     | 0.01849736 | 0.028018 |
| NGFRAP1  | 0.01687426 | 0.038339 |
| NGLY1    | 11.8285865 | 11.43312 |
| NGRN     | 21.7540498 | 25.02508 |
| NHEDC1   | 0.20661299 | 0.201185 |
| NHEDC1P1 | 0          | 0        |
| NHEDC2   | 0.01876703 | 0.028426 |
| NHEJ1    | 1.69962257 | 1.374274 |
| NHLH1    | 0.49297376 | 0.597361 |
| NHLH2    | 0          | 0.008912 |
| NHLRC1   | 0.06896781 | 0.089541 |
| NHLRC2   | 4.10612346 | 3.156581 |
| NHLRC3   | 2.84958698 | 2.523786 |
| NHP2     | 2.65583128 | 3.072938 |
| NHP2L1   | 20.6660295 | 20.23971 |
| NHP2P1   | 0          | 0        |
| NHS      | 0.00460476 | 0.005231 |
| NHSL1    | 0.07497265 | 0.098797 |
| NHSL2    | 27.7113651 | 20.34257 |
| NIACR1   | 1.98544288 | 0.728698 |
| NIACR2   | 3.30580777 | 1.262994 |
| NICN1    | 5.1341682  | 4.45579  |
| NICN2P   | 0          | 0        |
| NID1     | 0.00357391 | 0.01218  |
| NID2     | 0.13333543 | 0.175139 |
| NIF3L1   | 4.44673666 | 3.857308 |
| NIN      | 65.5726817 | 41.35558 |
| NINJ1    | 623.193436 | 796.9721 |
| NINJ2    | 5.18704022 | 6.612262 |
| NINL     | 0.00845579 | 0.014409 |
| NIP30    | 40.8251686 | 37.32048 |
| NIP7     | 2.6666743  | 2.22009  |
| NIPA1    | 0.41482668 | 0.50025  |

|           |            |          |
|-----------|------------|----------|
| NIPA2     | 17.5892847 | 19.991   |
| NIPAL1    | 0          | 0.010887 |
| NIPAL2    | 3.79481583 | 3.569526 |
| NIPAL3    | 1.61971772 | 1.430641 |
| NIPAL4    | 0.01282423 | 0.014569 |
| NIPBL     | 26.3843719 | 25.36571 |
| NIPSNAP1  | 2.2304244  | 1.696947 |
| NIPSNAP3A | 5.71662397 | 5.207042 |
| NIPSNAP3B | 1.84811699 | 1.731398 |
| NISCH     | 28.9474541 | 27.74666 |
| NIT1      | 14.896802  | 12.24068 |
| NIT2      | 1.5218965  | 1.390636 |
| NKAIN1    | 0          | 0        |
| NKAIN2    | 0          | 0        |
| NKAIN3    | 0          | 0        |
| NKAIN4    | 0          | 0        |
| NKAP      | 14.4040204 | 13.73962 |
| NKAPL     | 0.12828146 | 0.058292 |
| NKD1      | 16.9031953 | 31.64361 |
| NKD2      | 0.04677493 | 0        |
| NKG7      | 0.71272308 | 0.896415 |
| NKIRAS1   | 1.06444031 | 0.921881 |
| NKIRAS2   | 10.7771351 | 10.00846 |
| NKPD1     | 0.00979745 | 0.01113  |
| NKRF      | 1.82942594 | 1.855586 |
| NKTR      | 41.9642801 | 37.5286  |
| NKX1-1    | 0.01701079 | 0        |
| NKX1-2    | 0          | 0.023167 |
| NKX2-1    | 0          | 0        |
| NKX2-2    | 0          | 0        |
| NKX2-3    | 0.02005277 | 0        |
| NKX2-4    | 0          | 0        |
| NKX2-5    | 0.01326519 | 0        |
| NKX2-6    | 0          | 0        |
| NKX2-8    | 0          | 0        |
| NKX3-1    | 0.10253133 | 0.043679 |
| NKX3-2    | 0.00938212 | 0.021316 |
| NKX6-1    | 0          | 0.021402 |
| NKX6-2    | 0          | 0.02344  |
| NKX6-3    | 0          | 0        |
| NLE1      | 0.06209031 | 0.052902 |
| NLGN1     | 0          | 0.004857 |
| NLGN2     | 0.0588818  | 0.082327 |
| NLGN3     | 1.30092548 | 1.128334 |
| NLGN4X    | 0          | 0.004107 |
| NLGN4Y    | 0          | 0        |
| NLK       | 2.60070459 | 2.408072 |

|           |            |          |
|-----------|------------|----------|
| NLN       | 0.01459586 | 0.016581 |
| NLRC3     | 2.0595036  | 4.582239 |
| NLRC4     | 0.30009393 | 0.21307  |
| NLRC5     | 42.2725652 | 47.23104 |
| NLRP1     | 16.2162907 | 15.73151 |
| NLRP10    | 0          | 0.011824 |
| NLRP11    | 0          | 0        |
| NLRP12    | 6.69793429 | 4.888464 |
| NLRP13    | 0          | 0        |
| NLRP14    | 0          | 0        |
| NLRP2     | 1.940247   | 1.48304  |
| NLRP2P    | 0          | 0        |
| NLRP3     | 0.14020003 | 0.100871 |
| NLRP3P    | 0          | 0        |
| NLRP4     | 0          | 0        |
| NLRP5     | 0          | 0        |
| NLRP6     | 0.0235446  | 0.017831 |
| NLRP7     | 0.01229192 | 0.020946 |
| NLRP8     | 0          | 0.012143 |
| NLRP9     | 0.01206965 | 0.013711 |
| NLRP9P    | 0          | 0        |
| NLRX1     | 33.211487  | 35.9425  |
| NMB       | 1.16353773 | 0.997145 |
| NMBR      | 0          | 0.01764  |
| NMD3      | 2.7283604  | 2.591639 |
| NME1      | 0.04078629 | 0.069501 |
| NME1-NME2 | 0.95933069 | 1.203337 |
| NME2      | 4.88221653 | 4.186269 |
| NME2P1    | 0          | 0        |
| NME3      | 5.97169163 | 5.723946 |
| NME4      | 35.9330631 | 36.69341 |
| NME5      | 0          | 0.019482 |
| NME6      | 4.12679931 | 3.253386 |
| NME7      | 0.46636594 | 0.485649 |
| NMI       | 24.4229335 | 21.88257 |
| NMNAT1    | 0.76182765 | 0.650666 |
| NMNAT2    | 0.01076198 | 0.004075 |
| NMNAT3    | 0.06771443 | 0.076925 |
| NMNATP    | 0          | 0        |
| NMRAL1    | 1.31215355 | 0.824229 |
| NMS       | 0          | 0        |
| NMT1      | 13.2451839 | 11.81545 |
| NMT2      | 1.2184944  | 1.064424 |
| NMU       | 0          | 0        |
| NMUR1     | 0.01926573 | 0.036477 |
| NMUR2     | 0          | 0        |
| NNAT      | 0          | 0        |

|          |            |          |
|----------|------------|----------|
| NNMT     | 0          | 0.015136 |
| NNT      | 6.79006252 | 5.983599 |
| NOB1     | 1.50706044 | 1.280554 |
| NOBOX    | 0          | 0        |
| NOC2L    | 4.79828089 | 5.032934 |
| NOC3L    | 0.2447652  | 0.278057 |
| NOC4L    | 4.54775847 | 4.668719 |
| NOD1     | 6.36932846 | 5.91284  |
| NOD2     | 6.92874898 | 6.768779 |
| NODAL    | 0.95752945 | 1.064868 |
| NOG      | 0.02222551 | 0.025249 |
| NOL10    | 1.54005285 | 1.537668 |
| NOL11    | 6.52008022 | 5.635484 |
| NOL12    | 4.61965018 | 4.423791 |
| NOL3     | 0.06076685 | 0        |
| NOL4     | 0          | 0.006143 |
| NOL5BP   | 0          | 0        |
| NOL6     | 2.78575887 | 2.593747 |
| NOL7     | 13.3753822 | 14.56609 |
| NOL8     | 8.85994498 | 7.725746 |
| NOL9     | 1.82313409 | 1.692248 |
| NOLC1    | 5.07471149 | 4.84256  |
| NOM1     | 1.43928545 | 1.131958 |
| NOMO1    | 13.465717  | 13.02517 |
| NOMO2    | 7.31659765 | 5.666606 |
| NOMO3    | 5.7691754  | 4.168131 |
| NONO     | 57.1630269 | 55.63048 |
| NOP10    | 65.3946742 | 85.27207 |
| NOP14    | 2.23367121 | 1.784426 |
| NOP16    | 1.25290613 | 0.444788 |
| NOP2     | 3.52091471 | 4.174862 |
| NOP56    | 19.6250895 | 16.49885 |
| NOP58    | 4.50466378 | 3.841066 |
| NOS1     | 0          | 0.003352 |
| NOS1AP   | 0.01526894 | 0.020815 |
| NOS2     | 0          | 0.011358 |
| NOS2P1   | 0          | 0        |
| NOS2P2   | 0          | 0        |
| NOS2P3   | 0          | 0        |
| NOS3     | 0.23339868 | 0.386669 |
| NOSIP    | 28.6082372 | 28.47505 |
| NOSTRIN  | 0.02539291 | 0        |
| NOTCH1   | 200.031312 | 260.4595 |
| NOTCH2   | 21.1320679 | 15.45163 |
| NOTCH2NL | 2.80930964 | 2.257581 |
| NOTCH3   | 0.01302523 | 0.017756 |
| NOTCH4   | 0.16209299 | 0.205387 |

|         |            |          |
|---------|------------|----------|
| NOTO    | 0          | 0        |
| NOTUM   | 0.00948369 | 0.010774 |
| NOV     | 2.02897273 | 0.63363  |
| NOVA1   | 0          | 0        |
| NOVA2   | 0.01120156 | 0        |
| NOX1    | 0.00831369 | 0.009444 |
| NOX3    | 0          | 0        |
| NOX4    | 0.02247737 | 0.015321 |
| NOX5    | 0          | 0        |
| NOXA1   | 1.54503351 | 1.784436 |
| NOXO1   | 0.02755613 | 0        |
| NP      | 4.28916752 | 4.410784 |
| N-PAC   | 30.135181  | 30.8484  |
| NPAS1   | 0.0308742  | 0.023382 |
| NPAS2   | 0.00525108 | 0        |
| NPAS3   | 0.00713449 | 0.004052 |
| NPAS4   | 0.00636745 | 0        |
| NPAT    | 4.56056354 | 4.291918 |
| NPB     | 0.33373541 | 0.379129 |
| NPBWR1  | 1.29943788 | 2.129574 |
| NPBWR2  | 0.08393346 | 0.262212 |
| NPC1    | 5.83863114 | 4.875549 |
| NPC1L1  | 0.00833016 | 0.009463 |
| NPC2    | 25.5960551 | 21.46198 |
| NPDC1   | 0.01376003 | 0.015632 |
| NPEPL1  | 18.0904449 | 17.66514 |
| NPEPPS  | 26.6220715 | 24.57871 |
| NPFF    | 4.90117512 | 3.953954 |
| NPFFR1  | 0          | 0        |
| NPFFR2  | 0          | 0        |
| NPHP1   | 0          | 0        |
| NPHP3   | 3.84094035 | 3.344805 |
| NPHP4   | 3.11470817 | 3.447631 |
| NPHS1   | 0.00431909 | 0.004907 |
| NPHS2   | 0          | 0        |
| NPIP    | 3.7204533  | 3.662961 |
| NPIPL1  | 1.88233537 | 1.896284 |
| NPIPL2  | 0.74673761 | 0.78645  |
| NPIPL3  | 21.3034438 | 22.51603 |
| NPL     | 44.2588636 | 37.9053  |
| NPL2    | 0          | 0.009608 |
| NPLOC4  | 23.9720448 | 23.46531 |
| NPM1    | 10.8361321 | 9.22898  |
| NPM1P1  | 0          | 0        |
| NPM1P10 | 0          | 0        |
| NPM1P12 | 0          | 0        |
| NPM1P13 | 0          | 0        |



|         |            |          |
|---------|------------|----------|
| NPM1P14 | 0          | 0        |
| NPM1P16 | 0          | 0        |
| NPM1P17 | 0          | 0        |
| NPM1P18 | 0          | 0        |
| NPM1P19 | 0          | 0        |
| NPM1P2  | 0          | 0        |
| NPM1P20 | 0          | 0        |
| NPM1P21 | 0          | 0        |
| NPM1P3  | 0          | 0        |
| NPM1P5  | 0          | 0        |
| NPM1P6  | 0          | 0        |
| NPM1P7  | 0          | 0        |
| NPM1P9  | 0          | 0        |
| NPM2    | 0.11468362 | 0.043427 |
| NPM3    | 0.31166397 | 0.462995 |
| NPNT    | 0          | 0        |
| NPPA    | 0.52563327 | 0.369651 |
| NPPB    | 0          | 0        |
| NPPC    | 0.0551846  | 0        |
| NPR1    | 0.01004795 | 0.011415 |
| NPR2    | 0.00612983 | 0.013927 |
| NPR3    | 0          | 0.027081 |
| NPS     | 0          | 0        |
| NPSR1   | 0          | 0.013095 |
| NPTN    | 35.6508992 | 31.42932 |
| NPTX1   | 0.01933542 | 0.030751 |
| NPTX2   | 0.01549969 | 0        |
| NPTXR   | 0.0253143  | 0.032866 |
| NPVF    | 0          | 0        |
| NPW     | 0.02069422 | 0        |
| NPY     | 0          | 0        |
| NPY1R   | 0          | 0.008657 |
| NPY2R   | 0          | 0        |
| NPY5R   | 0          | 0        |
| NPY6R   | 0          | 0        |
| NQO1    | 0.02434427 | 0.009218 |
| NQO2    | 21.8929258 | 25.77243 |
| NR0B1   | 0          | 0        |
| NR0B2   | 0.03308471 | 0.07517  |
| NR1D1   | 0.06081079 | 0.086353 |
| NR1D2   | 8.30327019 | 8.98073  |
| NR1H2   | 63.5540725 | 56.99147 |
| NR1H3   | 0.8082225  | 0.44596  |
| NR1H4   | 0          | 0.011146 |
| NR1H5P  | 0          | 0        |
| NR1I2   | 0          | 0        |
| NR1I3   | 0.14932763 | 0.237494 |

|         |            |          |
|---------|------------|----------|
| NR2C1   | 4.48096208 | 4.194952 |
| NR2C2   | 18.7334942 | 17.81204 |
| NR2C2AP | 0.85784645 | 0.459683 |
| NR2E1   | 0.0193544  | 0        |
| NR2E3   | 0.00748232 | 0        |
| NR2F1   | 0          | 0        |
| NR2F2   | 0.00688227 | 0.015637 |
| NR2F6   | 4.49876815 | 7.864609 |
| NR3C1   | 18.1224306 | 19.42239 |
| NR3C2   | 0.06090145 | 0.036627 |
| NR4A1   | 4.19719154 | 5.608975 |
| NR4A2   | 12.0995391 | 17.61451 |
| NR4A3   | 12.6615977 | 13.04575 |
| NR5A1   | 0.01358664 | 0.007717 |
| NR5A2   | 0          | 0.004733 |
| NR6A1   | 0.71853129 | 0.665568 |
| NRAP    | 0          | 0        |
| NRARP   | 5.11795542 | 5.422221 |
| NRAS    | 13.4701627 | 12.48065 |
| NRBF2   | 21.5576178 | 20.52154 |
| NRBP1   | 70.2977785 | 68.84468 |
| NRBP2   | 4.9567022  | 5.110907 |
| NRCAM   | 0.82665242 | 0.829415 |
| NRD1    | 45.7115554 | 43.4512  |
| NRF1    | 9.04483746 | 9.569862 |
| NRG1    | 0.01015553 | 0.015382 |
| NRG2    | 0.00677581 | 0        |
| NRG3    | 0.00569484 | 0.006469 |
| NRG4    | 0          | 0        |
| NRGN    | 0.84584665 | 0.666744 |
| NRIP1   | 5.74328786 | 7.94379  |
| NRIP2   | 1.0069748  | 0.696685 |
| NRIP3   | 1.22541966 | 1.42345  |
| NRK     | 0          | 0.002963 |
| NRL     | 0.43669634 | 0.483994 |
| NRM     | 1.30389649 | 1.683235 |
| NRN1    | 0.01022136 | 0.023223 |
| NRN1L   | 1.12932267 | 1.282928 |
| NRP1    | 0          | 0        |
| NRP2    | 0.00272384 | 0.012377 |
| NRSN1   | 0          | 0        |
| NRSN2   | 0.22029894 | 0.150158 |
| NRTN    | 0          | 0        |
| NRXN1   | 0.00593601 | 0.002248 |
| NRXN2   | 0.00855152 | 0.025906 |
| NRXN3   | 0.00563757 | 0        |
| NS3BP   | 0          | 0        |

|         |            |          |
|---------|------------|----------|
| NSAP11  | 0          | 0        |
| NSBP1   | 0.23674635 | 0.217719 |
| NSD1    | 13.7190325 | 12.76104 |
| NSDHL   | 1.98644231 | 1.78772  |
| NSF     | 5.87526823 | 5.451058 |
| NSFL1C  | 20.448346  | 19.43451 |
| NSL1    | 1.73991771 | 1.523082 |
| NSMAF   | 15.0395309 | 13.9535  |
| NSMCE1  | 4.85047654 | 4.318212 |
| NSMCE2  | 5.30837564 | 5.202697 |
| NSMCE4A | 3.6319267  | 3.638475 |
| NSUN2   | 21.2042114 | 20.72752 |
| NSUN3   | 3.86807482 | 3.445448 |
| NSUN4   | 3.31779343 | 2.977562 |
| NSUN5   | 14.6792328 | 17.48001 |
| NSUN5B  | 3.19328652 | 2.704465 |
| NSUN5C  | 2.55762164 | 1.977922 |
| NSUN6   | 1.91533312 | 1.703266 |
| NSUN7   | 0.01705679 | 0        |
| NT5C    | 46.5417262 | 53.50671 |
| NT5C1A  | 0          | 0        |
| NT5C1B  | 0.01469275 | 0.025037 |
| NT5C2   | 35.175563  | 33.41509 |
| NT5C3   | 25.3554637 | 23.1077  |
| NT5C3L  | 0.37225176 | 0.53252  |
| NT5C3P1 | 0          | 0        |
| NT5CP1  | 0          | 0        |
| NT5CP2  | 0          | 0        |
| NT5DC1  | 4.86492158 | 5.053353 |
| NT5DC2  | 1.81744386 | 5.434874 |
| NT5DC3  | 0.04080325 | 0.046353 |
| NT5DC4  | 0.34147869 | 0.341744 |
| NT5E    | 0          | 0.011775 |
| NT5M    | 0.50312505 | 0.466271 |
| NTAN1   | 47.6284251 | 43.23806 |
| NTF3    | 0          | 0.017097 |
| NTF4    | 0.02104638 | 0        |
| NTF6A   | 0          | 0        |
| NTF6B   | 0          | 0        |
| NTF6G   | 0          | 0        |
| NTHL1   | 0.57144761 | 0.111926 |
| NTM     | 0          | 0.005703 |
| NTN1    | 0.22953418 | 0.216627 |
| NTN3    | 0.01058677 | 0.024053 |
| NTN4    | 0.00581614 | 0.013214 |
| NTN5    | 0.01145171 | 0.013009 |
| NTNG1   | 0          | 0        |

|          |            |          |
|----------|------------|----------|
| NTNG2    | 19.5696788 | 25.5233  |
| NTRK1    | 0.30172859 | 0.183925 |
| NTRK2    | 0          | 0.005659 |
| NTRK3    | 0          | 0.004688 |
| NTS      | 0          | 0        |
| NTSR1    | 0.00508842 | 0.005781 |
| NTSR2    | 0.01307545 | 0        |
| NUAK1    | 0.00924732 | 0.014007 |
| NUAK2    | 22.5028535 | 27.71263 |
| NUB1     | 28.5570958 | 28.35156 |
| NUBP1    | 5.64885109 | 4.691718 |
| NUBP2    | 9.82804906 | 9.678481 |
| NUBPL    | 0.5154952  | 0.491913 |
| NUCB1    | 38.2031949 | 37.12507 |
| NUCB2    | 12.4430309 | 8.267922 |
| NUCKS1   | 12.237896  | 12.05175 |
| NUDC     | 21.152085  | 19.27728 |
| NUDCD1   | 0.34509975 | 0.286715 |
| NUDCD2   | 2.15132606 | 1.864449 |
| NUDCD3   | 5.90094707 | 5.654315 |
| NUDCP1   | 0          | 0        |
| NUDCP2   | 0          | 0        |
| NUDT1    | 3.51258512 | 2.793247 |
| NUDT10   | 0.01050741 | 0        |
| NUDT11   | 0.00877518 | 0        |
| NUDT12   | 0.12055809 | 0.075326 |
| NUDT13   | 0.94933766 | 0.919531 |
| NUDT14   | 0.51044156 | 0.414193 |
| NUDT15   | 1.5285478  | 1.26395  |
| NUDT16   | 3.69901974 | 2.640931 |
| NUDT16L1 | 15.9011071 | 14.95321 |
| NUDT16P  | 0          | 0        |
| NUDT17   | 5.36694175 | 3.714976 |
| NUDT18   | 2.35306535 | 2.091323 |
| NUDT19   | 5.69746077 | 6.794416 |
| NUDT2    | 4.83979316 | 4.078495 |
| NUDT21   | 13.1962935 | 12.89373 |
| NUDT22   | 28.4913921 | 28.75613 |
| NUDT3    | 120.173587 | 114.398  |
| NUDT4    | 50.7351327 | 30.93204 |
| NUDT4P1  | 0          | 0        |
| NUDT5    | 10.59998   | 6.983022 |
| NUDT6    | 0          | 0        |
| NUDT7    | 0.05770905 | 0.021853 |
| NUDT8    | 0.10395714 | 0.029524 |
| NUDT9    | 0.98826468 | 1.06655  |
| NUDT9P1  | 0          | 0        |

|         |            |          |
|---------|------------|----------|
| NUF2    | 0.39111978 | 0.396284 |
| NUFIP1  | 0.27133349 | 0.328788 |
| NUFIP1P | 0          | 0        |
| NUFIP2  | 29.8045661 | 32.38101 |
| NUMA1   | 61.7264137 | 69.16106 |
| NUMB    | 46.031858  | 45.29912 |
| NUMBL   | 0.495964   | 0.543301 |
| NUP107  | 8.68876513 | 7.714493 |
| NUP133  | 7.84542326 | 6.61566  |
| NUP153  | 18.3301549 | 18.08918 |
| NUP155  | 3.97014629 | 3.83763  |
| NUP160  | 6.59702471 | 5.68841  |
| NUP188  | 4.46820621 | 4.118701 |
| NUP205  | 5.00219698 | 4.504899 |
| NUP210  | 12.7713316 | 12.6517  |
| NUP210L | 0.01429322 | 0.004059 |
| NUP214  | 13.7153575 | 13.56541 |
| NUP35   | 0.79826731 | 0.570434 |
| NUP37   | 4.47310435 | 4.13244  |
| NUP43   | 3.83570227 | 3.637389 |
| NUP50   | 56.1719818 | 42.61819 |
| NUP50P1 | 0          | 0        |
| NUP50P2 | 0          | 0        |
| NUP50P3 | 0          | 0        |
| NUP54   | 9.71774005 | 9.507369 |
| NUP62   | 1.62348271 | 1.767456 |
| NUP62CL | 0.05966325 | 0.054223 |
| NUP85   | 13.0555387 | 13.43602 |
| NUP88   | 4.80604469 | 3.67697  |
| NUP93   | 30.2435981 | 23.9462  |
| NUP98   | 45.31098   | 49.16031 |
| NUPL1   | 5.6575885  | 6.036778 |
| NUPL2   | 7.11374581 | 6.818621 |
| NUPR1   | 0.04610818 | 0.02619  |
| NUS1    | 5.10446613 | 4.880287 |
| NUSAP1  | 7.95834841 | 8.468357 |
| NUTF2   | 7.68872148 | 6.523924 |
| NUTF2P2 | 0          | 0        |
| NVL     | 4.42790865 | 3.8877   |
| NWD1    | 0.02001698 | 0.019897 |
| NXF1    | 52.5405124 | 50.73642 |
| NXF2    | 0.00537595 | 0        |
| NXF2B   | 0          | 0.006033 |
| NXF3    | 0          | 0.012598 |
| NXF4    | 0          | 0        |
| NXF5    | 0.05098286 | 0.03475  |
| NXN     | 0.03499556 | 0.047707 |

|        |            |          |
|--------|------------|----------|
| NXNL1  | 0.06946695 | 0        |
| NXNL2  | 0.04338101 | 0        |
| NXPH1  | 0          | 0        |
| NXPH2  | 0          | 0        |
| NXPH3  | 0          | 0        |
| NXPH4  | 0.01165484 | 0.03972  |
| NXT1   | 5.13868877 | 7.933192 |
| NXT2   | 1.36680272 | 1.073588 |
| NYX    | 0.05598224 | 0.072682 |
| OAF    | 0.0338754  | 0.064138 |
| OAS1   | 0.08456644 | 0.072052 |
| OAS2   | 0.24539209 | 0.23618  |
| OAS3   | 0.75826982 | 0.865011 |
| OASL   | 74.9402868 | 98.4539  |
| OAT    | 5.62778704 | 5.722715 |
| OATL3  | 0          | 0        |
| OAZ1   | 744.362764 | 870.3892 |
| OAZ2   | 39.9986072 | 28.98376 |
| OAZ3   | 0.05808102 | 0.043987 |
| OBFC1  | 6.94033754 | 5.91325  |
| OBFC2A | 4.10237037 | 3.425456 |
| OBFC2B | 1.23060467 | 1.176354 |
| OBP2A  | 0          | 0        |
| OBP2B  | 0          | 0        |
| OBSCN  | 0.0359589  | 0.041778 |
| OBSL1  | 0          | 0.004089 |
| OC90   | 0          | 0.040211 |
| OCA2   | 0.01339193 | 0.030427 |
| OCEL1  | 5.66585454 | 5.276179 |
| OCIAD1 | 17.2605388 | 16.90331 |
| OCIAD2 | 14.2003544 | 17.72625 |
| OCLM   | 0          | 0.027019 |
| OCLN   | 0.00796414 | 0        |
| OCM    | 0.18125285 | 0.343177 |
| OCM2   | 0.03575737 | 0        |
| OCRL   | 0.28131624 | 0.213053 |
| ODAM   | 0          | 0        |
| ODC1   | 5.06769616 | 7.876758 |
| ODF1   | 0          | 0        |
| ODF2   | 13.2397557 | 15.33823 |
| ODF2L  | 6.36714816 | 5.463914 |
| ODF3   | 0.06549947 | 0.111613 |
| ODF3B  | 9.2440857  | 10.57662 |
| ODF3L1 | 0.03524783 | 0        |
| ODF3L2 | 0.01310806 | 0        |
| ODF4   | 0.01829881 | 0        |
| ODZ1   | 0.00778356 | 0.011053 |

|          |            |          |
|----------|------------|----------|
| ODZ2     | 0.00217992 | 0        |
| ODZ3     | 0.00583497 | 0.006629 |
| ODZ4     | 0.00155191 | 0.001763 |
| OFCC1    | 0          | 0        |
| OFD1     | 14.7309769 | 13.91499 |
| OFD1P1   | 0          | 0        |
| OFD1P10Y | 0          | 0        |
| OFD1P11Y | 0          | 0        |
| OFD1P12Y | 0          | 0        |
| OFD1P13Y | 0          | 0        |
| OFD1P14Y | 0          | 0        |
| OFD1P15Y | 0          | 0        |
| OFD1P16Y | 0          | 0        |
| OFD1P18Y | 0          | 0        |
| OFD1P1Y  | 0          | 0        |
| OFD1P2Y  | 0          | 0        |
| OFD1P3Y  | 0          | 0        |
| OFD1P4Y  | 0          | 0        |
| OFD1P5Y  | 0          | 0        |
| OFD1P6Y  | 0          | 0        |
| OFD1P7Y  | 0          | 0        |
| OFD1P8Y  | 0          | 0        |
| OFD1P9Y  | 0          | 0        |
| OGDH     | 28.9137452 | 31.73329 |
| OGDHL    | 0          | 0        |
| OGFOD1   | 3.23734401 | 3.24268  |
| OGFOD2   | 5.80218268 | 4.868888 |
| OGFR     | 58.9404319 | 62.32829 |
| OGFRL1   | 0.29000456 | 0.521629 |
| OGG1     | 3.74950503 | 3.343747 |
| OGN      | 0          | 0        |
| OGT      | 46.4338305 | 42.02886 |
| OIP5     | 0.81651771 | 0.830954 |
| OIT3     | 0.01781053 | 0.040466 |
| OLA1     | 0.75297329 | 0.55381  |
| OLAH     | 0.03439258 | 0        |
| OLFM1    | 0          | 0        |
| OLFM2    | 14.551653  | 21.62623 |
| OLFM3    | 0          | 0        |
| OLFM4    | 0.00745844 | 0.033892 |
| OLFML1   | 0.12431829 | 0.07944  |
| OLFML2A  | 0          | 0.007302 |
| OLFML2B  | 0.00665359 | 0.007559 |
| OLFML3   | 0.04636236 | 0.039501 |
| OLIG1    | 12.0939578 | 5.865934 |
| OLIG2    | 6.75210588 | 2.236829 |
| OLIG3    | 0          | 0        |

|          |            |          |
|----------|------------|----------|
| OLR1     | 48.5187089 | 65.66506 |
| OMA1     | 4.22929654 | 3.603411 |
| OMD      | 0          | 0        |
| OMG      | 0          | 0        |
| OMP      | 0          | 0        |
| ONECUT1  | 0          | 0        |
| ONECUT2  | 0.00391242 | 0.001482 |
| ONECUT3  | 0.02831694 | 0.016084 |
| OOEP     | 0.03096514 | 0.070354 |
| OPA1     | 8.92765753 | 8.050181 |
| OPA3     | 1.00240331 | 1.0852   |
| OPALIN   | 0          | 0        |
| OPCML    | 0.00642485 | 0        |
| OPHN1    | 0.03350205 | 0.012686 |
| OPHN1P1  | 0          | 0        |
| OPLAH    | 2.26563806 | 3.342366 |
| OPN1LW   | 0          | 0        |
| OPN1MW   | 0          | 0        |
| OPN1MW2  | 0.0171916  | 0.01953  |
| OPN1SW   | 0.26808254 | 0.261039 |
| OPN3     | 1.0065318  | 1.098062 |
| OPN4     | 0          | 0        |
| OPN5     | 0          | 0        |
| OPRD1    | 0.01185193 | 0.013464 |
| OPRK1    | 0.00423983 | 0        |
| OPRL1    | 9.52055028 | 15.02508 |
| OPRM1    | 0.00638195 | 0.003625 |
| OPTC     | 0          | 0        |
| OPTN     | 0.11690481 | 0.185928 |
| OR10A2   | 0          | 0        |
| OR10A3   | 0.02224903 | 0        |
| OR10A4   | 0          | 0.050391 |
| OR10A5   | 0          | 0        |
| OR10A6   | 0          | 0        |
| OR10A7   | 0          | 0        |
| OR10AA1P | 0          | 0        |
| OR10AB1P | 0          | 0        |
| OR10AC1P | 0          | 0        |
| OR10AD1  | 0          | 0.025037 |
| OR10AE1P | 0          | 0        |
| OR10AE3P | 0          | 0        |
| OR10AF1P | 0          | 0        |
| OR10AG1  | 0.02320677 | 0        |
| OR10AH1P | 0          | 0        |
| OR10AK1P | 0          | 0        |
| OR10B1P  | 0          | 0        |
| OR10C1   | 0          | 0        |



|         |            |          |
|---------|------------|----------|
| OR10D1P | 0          | 0        |
| OR10D3P | 0          | 0        |
| OR10D4P | 0          | 0        |
| OR10D5P | 0          | 0        |
| OR10G1P | 0          | 0        |
| OR10G2  | 0          | 0        |
| OR10G3  | 0          | 0        |
| OR10G4  | 0          | 0        |
| OR10G5P | 0          | 0        |
| OR10G6  | 0          | 0        |
| OR10G7  | 0          | 0        |
| OR10G8  | 0          | 0        |
| OR10G9  | 0          | 0        |
| OR10H1  | 0          | 0        |
| OR10H2  | 0.02043278 | 0.023212 |
| OR10H3  | 0          | 0        |
| OR10H4  | 0          | 0        |
| OR10H5  | 0          | 0        |
| OR10J1  | 0          | 0        |
| OR10J2P | 0          | 0        |
| OR10J3  | 0          | 0        |
| OR10J4  | 0          | 0        |
| OR10J5  | 0          | 0        |
| OR10J6P | 0          | 0        |
| OR10J7P | 0          | 0        |
| OR10J8P | 0          | 0        |
| OR10J9P | 0          | 0        |
| OR10K1  | 0          | 0        |
| OR10K2  | 0          | 0        |
| OR10N1P | 0          | 0        |
| OR10P1  | 0.02231988 | 0        |
| OR10Q1  | 0          | 0        |
| OR10Q2P | 0          | 0        |
| OR10R1P | 0          | 0        |
| OR10R2  | 0          | 0        |
| OR10R3P | 0          | 0        |
| OR10S1  | 0          | 0        |
| OR10T1P | 0          | 0        |
| OR10T2  | 0          | 0        |
| OR10U1P | 0          | 0        |
| OR10V1  | 0          | 0        |
| OR10V2P | 0          | 0        |
| OR10V3P | 0          | 0        |
| OR10V7P | 0          | 0        |
| OR10W1  | 0          | 0        |
| OR10X1  | 0          | 0        |
| OR10Y1P | 0          | 0        |

|          |            |          |
|----------|------------|----------|
| OR10Z1   | 0          | 0        |
| OR11A1   | 0          | 0        |
| OR11G1P  | 0          | 0        |
| OR11G2   | 0          | 0        |
| OR11H1   | 0          | 0        |
| OR11H12  | 0          | 0        |
| OR11H13P | 0          | 0        |
| OR11H2   | 0          | 0        |
| OR11H3P  | 0          | 0        |
| OR11H4   | 0          | 0        |
| OR11H5P  | 0          | 0        |
| OR11H6   | 0          | 0        |
| OR11H7   | 0          | 0        |
| OR11H8P  | 0          | 0        |
| OR11I1P  | 0          | 0        |
| OR11J1P  | 0          | 0        |
| OR11J2P  | 0          | 0        |
| OR11J5P  | 0          | 0        |
| OR11K1P  | 0          | 0        |
| OR11K2P  | 0          | 0        |
| OR11L1   | 0          | 0        |
| OR11M1P  | 0          | 0        |
| OR11N1P  | 0          | 0        |
| OR11P1P  | 0          | 0        |
| OR11Q1P  | 0          | 0        |
| OR12D1P  | 0          | 0        |
| OR12D2   | 0          | 0.023122 |
| OR12D3   | 0          | 0        |
| OR13A1   | 0.04047224 | 0.126437 |
| OR13C1P  | 0          | 0        |
| OR13C2   | 0          | 0        |
| OR13C3   | 0          | 0        |
| OR13C4   | 0          | 0.024958 |
| OR13C5   | 0          | 0        |
| OR13C6P  | 0          | 0        |
| OR13C7P  | 0          | 0        |
| OR13C8   | 0          | 0        |
| OR13C9   | 0          | 0        |
| OR13D1   | 0          | 0        |
| OR13D2P  | 0          | 0        |
| OR13D3P  | 0          | 0        |
| OR13E1P  | 0          | 0        |
| OR13F1   | 0          | 0        |
| OR13G1   | 0          | 0        |
| OR13H1   | 0.02268105 | 0.025766 |
| OR13I1P  | 0          | 0        |
| OR13J1   | 0          | 0        |

|         |            |          |
|---------|------------|----------|
| OR13K1P | 0          | 0        |
| OR13Z1P | 0          | 0        |
| OR13Z2P | 0          | 0        |
| OR13Z3P | 0          | 0        |
| OR14A16 | 0          | 0        |
| OR14A2  | 0          | 0        |
| OR14C36 | 0          | 0        |
| OR14I1  | 0          | 0        |
| OR14J1  | 0          | 0        |
| OR14K1  | 0          | 0        |
| OR14L1P | 0          | 0        |
| OR1A1   | 0          | 0        |
| OR1A2   | 0          | 0        |
| OR1AA1P | 0          | 0        |
| OR1AB1P | 0          | 0        |
| OR1AC1P | 0          | 0        |
| OR1B1   | 0.02197004 | 0.024958 |
| OR1C1   | 0          | 0        |
| OR1D2   | 0.02239119 | 0        |
| OR1D3P  | 0          | 0        |
| OR1D4   | 0          | 0        |
| OR1D5   | 0          | 0.025437 |
| OR1E1   | 0          | 0        |
| OR1E2   | 0          | 0.024573 |
| OR1E3   | 0          | 0        |
| OR1F1   | 0          | 0        |
| OR1F12  | 0          | 0        |
| OR1F2P  | 0          | 0        |
| OR1G1   | 0.02231988 | 0        |
| OR1H1P  | 0          | 0        |
| OR1I1   | 0          | 0        |
| OR1J1   | 0          | 0        |
| OR1J2   | 0          | 0        |
| OR1J4   | 0          | 0        |
| OR1K1   | 0.02210866 | 0.050232 |
| OR1L1   | 0          | 0        |
| OR1L3   | 0          | 0        |
| OR1L4   | 0          | 0        |
| OR1L6   | 0          | 0        |
| OR1L8   | 0.02260788 | 0        |
| OR1M1   | 0          | 0        |
| OR1M4P  | 0          | 0        |
| OR1N1   | 0          | 0.025518 |
| OR1N2   | 0          | 0        |
| OR1P1   | 0          | 0        |
| OR1Q1   | 0          | 0        |
| OR1R1P  | 0          | 0        |

|         |            |          |
|---------|------------|----------|
| OR1S1   | 0          | 0        |
| OR1S2   | 0          | 0        |
| OR1X1P  | 0          | 0        |
| OR1X5P  | 0          | 0        |
| OR2A1   | 0          | 0.102401 |
| OR2A12  | 0          | 0        |
| OR2A13P | 0          | 0        |
| OR2A14  | 0          | 0        |
| OR2A15P | 0          | 0        |
| OR2A2   | 0          | 0        |
| OR2A20P | 0          | 0        |
| OR2A25  | 0          | 0.0256   |
| OR2A3P  | 0          | 0        |
| OR2A4   | 0          | 0        |
| OR2A41P | 0          | 0        |
| OR2A42  | 0.0229785  | 0.078312 |
| OR2A5   | 0          | 0        |
| OR2A7   | 0          | 0        |
| OR2A9P  | 0          | 0        |
| OR2AD1P | 0          | 0        |
| OR2AE1  | 0          | 0.024573 |
| OR2AF1P | 0          | 0        |
| OR2AG1  | 0          | 0        |
| OR2AG2  | 0.04421731 | 0        |
| OR2AH1P | 0          | 0        |
| OR2AI1P | 0          | 0        |
| OR2AJ1  | 0          | 0        |
| OR2AK2  | 0          | 0        |
| OR2AL1P | 0          | 0        |
| OR2AM1P | 0          | 0        |
| OR2AO1P | 0          | 0        |
| OR2AP1  | 0          | 0        |
| OR2AQ1P | 0          | 0        |
| OR2AS1P | 0          | 0        |
| OR2AS2P | 0          | 0        |
| OR2AT1P | 0          | 0        |
| OR2AT2P | 0          | 0        |
| OR2AT4  | 0          | 0        |
| OR2B11  | 0          | 0        |
| OR2B2   | 0          | 0        |
| OR2B3   | 0          | 0        |
| OR2B4P  | 0          | 0        |
| OR2B6   | 0          | 0.025356 |
| OR2B7P  | 0          | 0        |
| OR2B8P  | 0          | 0        |
| OR2BH1P | 0          | 0        |
| OR2C1   | 0.02029472 | 0        |

|        |            |          |
|--------|------------|----------|
| OR2C3  | 0.00766788 | 0.008711 |
| OR2D2  | 0          | 0        |
| OR2D3  | 0          | 0        |
| OR2E1P | 0          | 0        |
| OR2F1  | 0          | 0        |
| OR2F2  | 0.02203913 | 0        |
| OR2G1P | 0          | 0        |
| OR2G2  | 0          | 0        |
| OR2G3  | 0          | 0        |
| OR2G6  | 0          | 0        |
| OR2H1  | 0.0140356  | 0.015945 |
| OR2H2  | 0          | 0        |
| OR2H4P | 0          | 0        |
| OR2H5P | 0          | 0        |
| OR2I1P | 0          | 0        |
| OR2J1  | 0          | 0        |
| OR2J2  | 0          | 0        |
| OR2J3  | 0          | 0        |
| OR2J4P | 0          | 0        |
| OR2K2  | 0.04421731 | 0.050232 |
| OR2L13 | 0          | 0        |
| OR2L1P | 0          | 0        |
| OR2L2  | 0          | 0        |
| OR2L3  | 0          | 0        |
| OR2L5  | 0          | 0        |
| OR2L6P | 0          | 0        |
| OR2L8  | 0          | 0        |
| OR2L9P | 0          | 0        |
| OR2M1P | 0          | 0        |
| OR2M2  | 0          | 0        |
| OR2M3  | 0          | 0.025437 |
| OR2M4  | 0          | 0        |
| OR2M5  | 0          | 0        |
| OR2M7  | 0          | 0        |
| OR2N1P | 0          | 0        |
| OR2P1P | 0          | 0        |
| OR2Q1P | 0          | 0        |
| OR2R1P | 0          | 0        |
| OR2S1P | 0          | 0        |
| OR2S2  | 0          | 0        |
| OR2T1  | 0          | 0        |
| OR2T10 | 0          | 0        |
| OR2T11 | 0          | 0        |
| OR2T12 | 0          | 0        |
| OR2T2  | 0          | 0        |
| OR2T27 | 0          | 0        |
| OR2T29 | 0          | 0        |

|         |   |          |
|---------|---|----------|
| OR2T3   | 0 | 0.049917 |
| OR2T32P | 0 | 0        |
| OR2T33  | 0 | 0        |
| OR2T34  | 0 | 0        |
| OR2T35  | 0 | 0        |
| OR2T4   | 0 | 0        |
| OR2T5   | 0 | 0        |
| OR2T6   | 0 | 0        |
| OR2T7   | 0 | 0        |
| OR2T8   | 0 | 0        |
| OR2U1P  | 0 | 0        |
| OR2U2P  | 0 | 0        |
| OR2V1   | 0 | 0        |
| OR2V2   | 0 | 0        |
| OR2W1   | 0 | 0        |
| OR2W2P  | 0 | 0        |
| OR2W3   | 0 | 0        |
| OR2W4P  | 0 | 0        |
| OR2W5   | 0 | 0        |
| OR2W6P  | 0 | 0        |
| OR2X1P  | 0 | 0        |
| OR2Y1   | 0 | 0        |
| OR2Z1   | 0 | 0.025275 |
| OR3A1   | 0 | 0        |
| OR3A2   | 0 | 0        |
| OR3A3   | 0 | 0        |
| OR3A4   | 0 | 0        |
| OR3B1P  | 0 | 0        |
| OR3D1P  | 0 | 0        |
| OR4A10P | 0 | 0        |
| OR4A11P | 0 | 0        |
| OR4A12P | 0 | 0        |
| OR4A13P | 0 | 0        |
| OR4A14P | 0 | 0        |
| OR4A15  | 0 | 0        |
| OR4A16  | 0 | 0        |
| OR4A17P | 0 | 0        |
| OR4A18P | 0 | 0        |
| OR4A19P | 0 | 0        |
| OR4A1P  | 0 | 0        |
| OR4A21P | 0 | 0        |
| OR4A2P  | 0 | 0        |
| OR4A3P  | 0 | 0        |
| OR4A40P | 0 | 0        |
| OR4A41P | 0 | 0        |
| OR4A42P | 0 | 0        |
| OR4A43P | 0 | 0        |

|         |            |          |
|---------|------------|----------|
| OR4A44P | 0          | 0        |
| OR4A45P | 0          | 0        |
| OR4A46P | 0          | 0        |
| OR4A47  | 0          | 0        |
| OR4A48P | 0          | 0        |
| OR4A49P | 0          | 0        |
| OR4A4P  | 0          | 0        |
| OR4A5   | 0          | 0        |
| OR4A50P | 0          | 0        |
| OR4A6P  | 0          | 0        |
| OR4A7P  | 0          | 0        |
| OR4A8P  | 0          | 0        |
| OR4A9P  | 0          | 0        |
| OR4B1   | 0          | 0        |
| OR4B2P  | 0          | 0        |
| OR4C10P | 0          | 0        |
| OR4C11  | 0          | 0        |
| OR4C12  | 0          | 0        |
| OR4C13  | 0          | 0        |
| OR4C14P | 0          | 0        |
| OR4C15  | 0          | 0        |
| OR4C16  | 0          | 0        |
| OR4C17P | 0          | 0        |
| OR4C1P  | 0          | 0        |
| OR4C2P  | 0          | 0        |
| OR4C3   | 0          | 0        |
| OR4C45  | 0          | 0        |
| OR4C46  | 0          | 0        |
| OR4C4P  | 0          | 0        |
| OR4C5   | 0          | 0        |
| OR4C50P | 0          | 0        |
| OR4C6   | 0          | 0        |
| OR4C7P  | 0          | 0        |
| OR4C9P  | 0          | 0        |
| OR4D1   | 0          | 0        |
| OR4D10  | 0.02246296 | 0        |
| OR4D11  | 0          | 0.025518 |
| OR4D12P | 0          | 0        |
| OR4D2   | 0          | 0        |
| OR4D5   | 0          | 0        |
| OR4D6   | 0.02224903 | 0        |
| OR4D7P  | 0          | 0        |
| OR4D8P  | 0          | 0        |
| OR4D9   | 0          | 0        |
| OR4E1   | 0          | 0        |
| OR4E2   | 0          | 0        |
| OR4F13P | 0          | 0        |

|         |            |          |
|---------|------------|----------|
| OR4F14P | 0          | 0        |
| OR4F15  | 0          | 0        |
| OR4F16  | 0          | 0        |
| OR4F17  | 0          | 0        |
| OR4F1P  | 0          | 0        |
| OR4F21  | 0          | 0        |
| OR4F28P | 0          | 0        |
| OR4F29  | 0          | 0        |
| OR4F2P  | 0          | 0        |
| OR4F3   | 0          | 0        |
| OR4F4   | 0          | 0        |
| OR4F5   | 0          | 0        |
| OR4F6   | 0          | 0        |
| OR4F7P  | 0          | 0        |
| OR4F8P  | 0          | 0        |
| OR4G11P | 0          | 0        |
| OR4G1P  | 0          | 0        |
| OR4G2P  | 0          | 0        |
| OR4G3P  | 0          | 0        |
| OR4G4P  | 0          | 0        |
| OR4G6P  | 0          | 0        |
| OR4H12P | 0          | 0        |
| OR4H6P  | 0          | 0        |
| OR4H8P  | 0          | 0        |
| OR4K1   | 0          | 0.025518 |
| OR4K11P | 0          | 0        |
| OR4K12P | 0          | 0        |
| OR4K13  | 0          | 0        |
| OR4K14  | 0          | 0.0256   |
| OR4K15  | 0.0200815  | 0        |
| OR4K16P | 0          | 0        |
| OR4K17  | 0          | 0        |
| OR4K2   | 0.02224903 | 0        |
| OR4K3   | 0          | 0        |
| OR4K4P  | 0          | 0        |
| OR4K5   | 0          | 0        |
| OR4K6P  | 0          | 0        |
| OR4K7P  | 0          | 0        |
| OR4K8P  | 0          | 0        |
| OR4L1   | 0.02239119 | 0        |
| OR4M1   | 0          | 0.025356 |
| OR4M2   | 0          | 0        |
| OR4N1P  | 0          | 0        |
| OR4N2   | 0          | 0        |
| OR4N3P  | 0          | 0        |
| OR4N4   | 0          | 0        |
| OR4N5   | 0          | 0.025766 |



|          |            |          |
|----------|------------|----------|
| OR4P1P   | 0          | 0        |
| OR4P4    | 0          | 0        |
| OR4Q1P   | 0          | 0        |
| OR4Q2    | 0          | 0        |
| OR4Q3    | 0          | 0        |
| OR4R1P   | 0          | 0        |
| OR4R2P   | 0          | 0        |
| OR4R3P   | 0          | 0        |
| OR4S1    | 0          | 0        |
| OR4S2    | 0          | 0.025518 |
| OR4T1P   | 0          | 0        |
| OR4U1P   | 0          | 0        |
| OR4V1P   | 0          | 0        |
| OR4W1P   | 0          | 0        |
| OR4X1    | 0          | 0        |
| OR4X2    | 0          | 0        |
| OR4X7P   | 0          | 0        |
| OR51A10P | 0          | 0        |
| OR51A1P  | 0          | 0        |
| OR51A2   | 0          | 0        |
| OR51A3P  | 0          | 0        |
| OR51A4   | 0          | 0        |
| OR51A5P  | 0          | 0        |
| OR51A6P  | 0          | 0        |
| OR51A7   | 0          | 0        |
| OR51A8P  | 0          | 0        |
| OR51A9P  | 0          | 0        |
| OR51AB1P | 0          | 0        |
| OR51B2   | 0          | 0        |
| OR51B3P  | 0          | 0        |
| OR51B4   | 0          | 0        |
| OR51B5   | 0          | 0        |
| OR51B6   | 0          | 0        |
| OR51B8P  | 0          | 0        |
| OR51C1P  | 0          | 0        |
| OR51C4P  | 0          | 0        |
| OR51D1   | 0          | 0        |
| OR51E1   | 0.00676926 | 0        |
| OR51E2   | 0.00754949 | 0        |
| OR51F1   | 0          | 0        |
| OR51F2   | 0          | 0        |
| OR51F3P  | 0          | 0        |
| OR51F4P  | 0          | 0        |
| OR51F5P  | 0          | 0        |
| OR51G1   | 0          | 0        |
| OR51G2   | 0          | 0        |
| OR51H1P  | 0          | 0        |

|         |            |          |
|---------|------------|----------|
| OR51H2P | 0          | 0        |
| OR51I1  | 0.02224903 | 0        |
| OR51I2  | 0          | 0        |
| OR51J1  | 0          | 0        |
| OR51K1P | 0          | 0        |
| OR51L1  | 0          | 0.025195 |
| OR51M1  | 0          | 0        |
| OR51N1P | 0          | 0        |
| OR51P1P | 0          | 0        |
| OR51Q1  | 0          | 0        |
| OR51R1P | 0          | 0        |
| OR51S1  | 0          | 0        |
| OR51T1  | 0          | 0        |
| OR51V1  | 0          | 0        |
| OR52A1  | 0          | 0        |
| OR52A4  | 0          | 0        |
| OR52A5  | 0          | 0        |
| OR52B1P | 0          | 0        |
| OR52B2  | 0          | 0        |
| OR52B3P | 0          | 0        |
| OR52B4  | 0.08899611 | 0.075826 |
| OR52B5P | 0          | 0        |
| OR52B6  | 0.04171693 | 0        |
| OR52D1  | 0          | 0        |
| OR52E1  | 0          | 0        |
| OR52E2  | 0          | 0        |
| OR52E3P | 0          | 0        |
| OR52E4  | 0          | 0        |
| OR52E5  | 0          | 0        |
| OR52E6  | 0          | 0        |
| OR52E7P | 0          | 0        |
| OR52E8  | 0          | 0        |
| OR52H1  | 0          | 0        |
| OR52H2P | 0          | 0        |
| OR52I1  | 0          | 0        |
| OR52I2  | 0          | 0        |
| OR52J1P | 0          | 0        |
| OR52J2P | 0          | 0        |
| OR52J3  | 0          | 0        |
| OR52K1  | 0.53397666 | 0.353853 |
| OR52K2  | 0.11124514 | 0.151651 |
| OR52K3P | 0          | 0        |
| OR52L1  | 0          | 0        |
| OR52L2P | 0          | 0        |
| OR52M1  | 0          | 0        |
| OR52M2P | 0          | 0        |
| OR52N1  | 0          | 0        |

|         |            |          |
|---------|------------|----------|
| OR52N2  | 0.04353071 | 0.049452 |
| OR52N3P | 0          | 0        |
| OR52N4  | 0.0405503  | 0.023033 |
| OR52N5  | 0          | 0        |
| OR52P1P | 0          | 0        |
| OR52P2P | 0          | 0        |
| OR52Q1P | 0          | 0        |
| OR52R1  | 0.0177429  | 0        |
| OR52S1P | 0          | 0        |
| OR52T1P | 0          | 0        |
| OR52U1P | 0          | 0        |
| OR52V1P | 0          | 0        |
| OR52W1  | 0          | 0        |
| OR52X1P | 0          | 0        |
| OR52Y1P | 0          | 0        |
| OR52Z1  | 0          | 0        |
| OR55B1P | 0          | 0        |
| OR56A1  | 0          | 0        |
| OR56A3  | 0          | 0        |
| OR56A4  | 0          | 0        |
| OR56A5  | 0          | 0        |
| OR56A7P | 0          | 0        |
| OR56B1  | 0          | 0        |
| OR56B2P | 0          | 0        |
| OR56B3P | 0          | 0        |
| OR56B4  | 0          | 0        |
| OR5A1   | 0.06653586 | 0.050391 |
| OR5A2   | 0          | 0        |
| OR5AC1  | 0          | 0        |
| OR5AC2  | 0          | 0        |
| OR5AC4P | 0          | 0        |
| OR5AH1P | 0          | 0        |
| OR5AK1P | 0          | 0        |
| OR5AK2  | 0          | 0        |
| OR5AK3P | 0          | 0        |
| OR5AK4P | 0          | 0        |
| OR5AL1  | 0          | 0        |
| OR5AL2P | 0          | 0        |
| OR5AM1P | 0          | 0        |
| OR5AN1  | 0          | 0        |
| OR5AN2P | 0          | 0        |
| OR5AO1P | 0          | 0        |
| OR5AP1P | 0          | 0        |
| OR5AP2  | 0          | 0.025116 |
| OR5AQ1P | 0          | 0        |
| OR5AR1  | 0          | 0        |
| OR5AS1  | 0          | 0        |

|         |            |          |
|---------|------------|----------|
| OR5AU1  | 0          | 0        |
| OR5AW1P | 0          | 0        |
| OR5AZ1P | 0          | 0        |
| OR5B10P | 0          | 0        |
| OR5B12  | 0          | 0        |
| OR5B15P | 0          | 0        |
| OR5B17  | 0.02224903 | 0        |
| OR5B19P | 0          | 0        |
| OR5B1P  | 0          | 0        |
| OR5B2   | 0.02260788 | 0        |
| OR5B21  | 0.09043153 | 0.051366 |
| OR5B3   | 0          | 0        |
| OR5BA1P | 0          | 0        |
| OR5BB1P | 0          | 0        |
| OR5BC1P | 0          | 0        |
| OR5BD1P | 0          | 0        |
| OR5BE1P | 0          | 0        |
| OR5BH1P | 0          | 0        |
| OR5BJ1P | 0          | 0        |
| OR5BK1P | 0          | 0        |
| OR5BL1P | 0          | 0        |
| OR5BM1P | 0          | 0        |
| OR5BN1P | 0          | 0        |
| OR5BN2P | 0          | 0        |
| OR5BP1P | 0          | 0        |
| OR5BQ1P | 0          | 0        |
| OR5BR1P | 0          | 0        |
| OR5BS1P | 0          | 0        |
| OR5BT1P | 0          | 0        |
| OR5C1   | 0.02183316 | 0        |
| OR5D13  | 0          | 0        |
| OR5D14  | 0          | 0        |
| OR5D15P | 0          | 0        |
| OR5D16  | 0          | 0        |
| OR5D17P | 0          | 0        |
| OR5D18  | 0          | 0        |
| OR5D2P  | 0          | 0        |
| OR5D3P  | 0          | 0        |
| OR5E1P  | 0          | 0        |
| OR5F1   | 0          | 0        |
| OR5F2P  | 0          | 0        |
| OR5G1P  | 0          | 0        |
| OR5G3   | 0          | 0        |
| OR5G4P  | 0          | 0        |
| OR5G5P  | 0          | 0        |
| OR5H1   | 0          | 0        |
| OR5H14  | 0          | 0        |

|         |            |          |
|---------|------------|----------|
| OR5H15  | 0          | 0        |
| OR5H2   | 0          | 0        |
| OR5H3P  | 0          | 0        |
| OR5H4P  | 0          | 0        |
| OR5H5P  | 0          | 0        |
| OR5H6   | 0          | 0        |
| OR5H7P  | 0          | 0        |
| OR5H8P  | 0          | 0        |
| OR5I1   | 0          | 0        |
| OR5J1P  | 0          | 0        |
| OR5J2   | 0          | 0        |
| OR5J7P  | 0          | 0        |
| OR5K1   | 0          | 0.025089 |
| OR5K2   | 0.15476059 | 0.075347 |
| OR5K3   | 0          | 0        |
| OR5K4   | 0          | 0        |
| OR5L1   | 0          | 0        |
| OR5L2   | 0          | 0        |
| OR5M1   | 0          | 0        |
| OR5M10  | 0          | 0        |
| OR5M11  | 0          | 0        |
| OR5M12P | 0          | 0        |
| OR5M13P | 0          | 0        |
| OR5M14P | 0          | 0        |
| OR5M2P  | 0          | 0        |
| OR5M3   | 0          | 0        |
| OR5M4P  | 0          | 0        |
| OR5M5P  | 0          | 0        |
| OR5M6P  | 0          | 0        |
| OR5M7P  | 0          | 0        |
| OR5M8   | 0          | 0        |
| OR5M9   | 0          | 0        |
| OR5P1P  | 0          | 0        |
| OR5P2   | 0.02169797 | 0        |
| OR5P3   | 0          | 0        |
| OR5P4P  | 0          | 0        |
| OR5R1   | 0          | 0        |
| OR5S1P  | 0          | 0        |
| OR5T1   | 0          | 0        |
| OR5T2   | 0          | 0        |
| OR5T3   | 0          | 0        |
| OR5V1   | 0          | 0        |
| OR5W1P  | 0          | 0        |
| OR5W2   | 0          | 0        |
| OR6A2   | 0          | 0        |
| OR6B1   | 0          | 0        |
| OR6B2   | 0          | 0        |

|         |            |          |
|---------|------------|----------|
| OR6B3   | 0          | 0        |
| OR6C1   | 0          | 0        |
| OR6C2   | 0          | 0        |
| OR6C3   | 0          | 0        |
| OR6C4   | 0          | 0        |
| OR6C5P  | 0          | 0        |
| OR6C6   | 0          | 0        |
| OR6C64P | 0          | 0        |
| OR6C65  | 0          | 0        |
| OR6C66P | 0          | 0        |
| OR6C68  | 0.02203913 | 0        |
| OR6C69P | 0          | 0        |
| OR6C70  | 0          | 0        |
| OR6C71P | 0          | 0        |
| OR6C72P | 0          | 0        |
| OR6C73P | 0          | 0        |
| OR6C74  | 0          | 0        |
| OR6C75  | 0          | 0        |
| OR6C76  | 0          | 0        |
| OR6C7P  | 0          | 0        |
| OR6D1P  | 0          | 0        |
| OR6E1P  | 0          | 0        |
| OR6F1   | 0          | 0        |
| OR6J1   | 0          | 0        |
| OR6K1P  | 0          | 0        |
| OR6K2   | 0          | 0        |
| OR6K3   | 0.04221954 | 0.023981 |
| OR6K4P  | 0          | 0        |
| OR6K5P  | 0          | 0        |
| OR6K6   | 0          | 0        |
| OR6L1P  | 0          | 0        |
| OR6L2P  | 0          | 0        |
| OR6M1   | 0          | 0        |
| OR6M2P  | 0          | 0        |
| OR6M3P  | 0          | 0        |
| OR6N1   | 0          | 0        |
| OR6N2   | 0.02203913 | 0        |
| OR6P1   | 0          | 0        |
| OR6Q1   | 0          | 0        |
| OR6R1P  | 0          | 0        |
| OR6R2P  | 0          | 0        |
| OR6S1   | 0.02110977 | 0        |
| OR6T1   | 0          | 0.024573 |
| OR6U2P  | 0          | 0        |
| OR6V1   | 0          | 0        |
| OR6W1P  | 0          | 0        |
| OR6X1   | 0          | 0        |

|          |   |          |
|----------|---|----------|
| OR6Y1    | 0 | 0        |
| OR7A10   | 0 | 0        |
| OR7A11P  | 0 | 0        |
| OR7A15P  | 0 | 0        |
| OR7A17   | 0 | 0        |
| OR7A18P  | 0 | 0        |
| OR7A19P  | 0 | 0        |
| OR7A1P   | 0 | 0        |
| OR7A2P   | 0 | 0        |
| OR7A3P   | 0 | 0        |
| OR7A5    | 0 | 0        |
| OR7A8P   | 0 | 0        |
| OR7C1    | 0 | 0        |
| OR7C2    | 0 | 0        |
| OR7D11P  | 0 | 0        |
| OR7D1P   | 0 | 0        |
| OR7D2    | 0 | 0.007409 |
| OR7D4    | 0 | 0        |
| OR7E100P | 0 | 0        |
| OR7E101P | 0 | 0        |
| OR7E102P | 0 | 0        |
| OR7E104P | 0 | 0        |
| OR7E105P | 0 | 0        |
| OR7E106P | 0 | 0        |
| OR7E108P | 0 | 0        |
| OR7E109P | 0 | 0        |
| OR7E10P  | 0 | 0        |
| OR7E110P | 0 | 0        |
| OR7E111P | 0 | 0        |
| OR7E115P | 0 | 0        |
| OR7E116P | 0 | 0        |
| OR7E117P | 0 | 0        |
| OR7E11P  | 0 | 0        |
| OR7E121P | 0 | 0        |
| OR7E122P | 0 | 0        |
| OR7E125P | 0 | 0        |
| OR7E126P | 0 | 0        |
| OR7E128P | 0 | 0        |
| OR7E129P | 0 | 0        |
| OR7E12P  | 0 | 0        |
| OR7E130P | 0 | 0        |
| OR7E136P | 0 | 0        |
| OR7E13P  | 0 | 0        |
| OR7E140P | 0 | 0        |
| OR7E145P | 0 | 0        |
| OR7E148P | 0 | 0        |
| OR7E149P | 0 | 0        |

|          |   |   |
|----------|---|---|
| OR7E14P  | 0 | 0 |
| OR7E154P | 0 | 0 |
| OR7E155P | 0 | 0 |
| OR7E156P | 0 | 0 |
| OR7E157P | 0 | 0 |
| OR7E158P | 0 | 0 |
| OR7E159P | 0 | 0 |
| OR7E15P  | 0 | 0 |
| OR7E160P | 0 | 0 |
| OR7E161P | 0 | 0 |
| OR7E162P | 0 | 0 |
| OR7E16P  | 0 | 0 |
| OR7E18P  | 0 | 0 |
| OR7E19P  | 0 | 0 |
| OR7E1P   | 0 | 0 |
| OR7E21P  | 0 | 0 |
| OR7E22P  | 0 | 0 |
| OR7E23P  | 0 | 0 |
| OR7E24   | 0 | 0 |
| OR7E25P  | 0 | 0 |
| OR7E26P  | 0 | 0 |
| OR7E28P  | 0 | 0 |
| OR7E29P  | 0 | 0 |
| OR7E2P   | 0 | 0 |
| OR7E31P  | 0 | 0 |
| OR7E33P  | 0 | 0 |
| OR7E35P  | 0 | 0 |
| OR7E36P  | 0 | 0 |
| OR7E37P  | 0 | 0 |
| OR7E38P  | 0 | 0 |
| OR7E39P  | 0 | 0 |
| OR7E41P  | 0 | 0 |
| OR7E43P  | 0 | 0 |
| OR7E46P  | 0 | 0 |
| OR7E47P  | 0 | 0 |
| OR7E4P   | 0 | 0 |
| OR7E53P  | 0 | 0 |
| OR7E55P  | 0 | 0 |
| OR7E59P  | 0 | 0 |
| OR7E5P   | 0 | 0 |
| OR7E62P  | 0 | 0 |
| OR7E66P  | 0 | 0 |
| OR7E7P   | 0 | 0 |
| OR7E83P  | 0 | 0 |
| OR7E84P  | 0 | 0 |
| OR7E85P  | 0 | 0 |
| OR7E86P  | 0 | 0 |



|         |   |          |
|---------|---|----------|
| OR7E87P | 0 | 0        |
| OR7E89P | 0 | 0        |
| OR7E8P  | 0 | 0        |
| OR7E90P | 0 | 0        |
| OR7E91P | 0 | 0        |
| OR7E93P | 0 | 0        |
| OR7E94P | 0 | 0        |
| OR7E96P | 0 | 0        |
| OR7E97P | 0 | 0        |
| OR7E99P | 0 | 0        |
| OR7G1   | 0 | 0        |
| OR7G15P | 0 | 0        |
| OR7G2   | 0 | 0        |
| OR7G3   | 0 | 0        |
| OR7H1P  | 0 | 0        |
| OR7H2P  | 0 | 0        |
| OR7K1P  | 0 | 0        |
| OR7L1P  | 0 | 0        |
| OR7M1P  | 0 | 0        |
| OR8A1   | 0 | 0        |
| OR8A2P  | 0 | 0        |
| OR8A3P  | 0 | 0        |
| OR8B10P | 0 | 0        |
| OR8B12  | 0 | 0        |
| OR8B1P  | 0 | 0        |
| OR8B2   | 0 | 0        |
| OR8B3   | 0 | 0.025356 |
| OR8B4   | 0 | 0        |
| OR8B5P  | 0 | 0        |
| OR8B6P  | 0 | 0        |
| OR8B7P  | 0 | 0        |
| OR8B8   | 0 | 0        |
| OR8B9P  | 0 | 0        |
| OR8C1P  | 0 | 0        |
| OR8D1   | 0 | 0        |
| OR8D2   | 0 | 0        |
| OR8D4   | 0 | 0        |
| OR8F1P  | 0 | 0        |
| OR8G1   | 0 | 0        |
| OR8G2   | 0 | 0        |
| OR8G3P  | 0 | 0        |
| OR8G5   | 0 | 0        |
| OR8G7P  | 0 | 0        |
| OR8H1   | 0 | 0        |
| OR8H2   | 0 | 0        |
| OR8H3   | 0 | 0        |
| OR8I1P  | 0 | 0        |

|         |            |          |
|---------|------------|----------|
| OR8I2   | 0          | 0        |
| OR8I4P  | 0          | 0        |
| OR8J1   | 0          | 0        |
| OR8J2   | 0          | 0        |
| OR8J3   | 0.02217862 | 0        |
| OR8K1   | 0          | 0        |
| OR8K2P  | 0          | 0        |
| OR8K3   | 0          | 0        |
| OR8K4P  | 0          | 0        |
| OR8K5   | 0          | 0.02585  |
| OR8L1P  | 0          | 0        |
| OR8Q1P  | 0          | 0        |
| OR8R1P  | 0          | 0        |
| OR8S1   | 0          | 0        |
| OR8S21P | 0          | 0        |
| OR8T1P  | 0          | 0        |
| OR8U1   | 0          | 0        |
| OR8V1P  | 0          | 0        |
| OR8X1P  | 0          | 0        |
| OR9A1P  | 0          | 0        |
| OR9A2   | 0          | 0        |
| OR9A3P  | 0          | 0        |
| OR9A4   | 0          | 0        |
| OR9G1   | 0.02290341 | 0        |
| OR9G2P  | 0          | 0        |
| OR9G3P  | 0          | 0        |
| OR9G4   | 0          | 0        |
| OR9G9   | 0          | 0        |
| OR9H1P  | 0          | 0        |
| OR9I1   | 0          | 0        |
| OR9I2P  | 0          | 0        |
| OR9I3P  | 0          | 0        |
| OR9K1P  | 0          | 0        |
| OR9K2   | 0          | 0.023696 |
| OR9L1P  | 0          | 0        |
| OR9M1P  | 0          | 0        |
| OR9N1P  | 0          | 0        |
| OR9P1P  | 0          | 0        |
| OR9Q1   | 0          | 0.011073 |
| OR9Q2   | 0          | 0        |
| OR9R1P  | 0          | 0        |
| OR9S24P | 0          | 0        |
| ORAI1   | 13.5624628 | 13.84251 |
| ORAI2   | 65.6590101 | 76.8165  |
| ORAI3   | 24.9651782 | 31.85409 |
| ORAOV1  | 9.29838608 | 10.18519 |
| ORC1L   | 7.06616286 | 10.872   |

|          |            |          |
|----------|------------|----------|
| ORC2L    | 7.78765863 | 7.025482 |
| ORC3L    | 3.55864821 | 3.234145 |
| ORC4L    | 3.84295532 | 3.422611 |
| ORC5L    | 1.30521623 | 1.568703 |
| ORC6L    | 0.78780417 | 1.144373 |
| ORM1     | 0          | 0        |
| ORM2     | 0.6726113  | 0.452798 |
| ORMDL1   | 18.1731321 | 17.17495 |
| ORMDL2   | 5.76856906 | 5.478893 |
| ORMDL3   | 29.5092364 | 28.60777 |
| OS9      | 142.151712 | 133.4518 |
| OSBP     | 13.3564418 | 12.75314 |
| OSBP2    | 0.16955912 | 0.181615 |
| OSBPL10  | 0.02143801 | 0.030442 |
| OSBPL11  | 5.28579903 | 4.212596 |
| OSBPL1A  | 0.22475202 | 0.145183 |
| OSBPL2   | 19.7545983 | 20.19197 |
| OSBPL3   | 0.74240218 | 0.572929 |
| OSBPL5   | 9.9149554  | 13.99801 |
| OSBPL6   | 0.02098336 | 0        |
| OSBPL7   | 6.75732054 | 7.519628 |
| OSBPL8   | 27.560545  | 35.54732 |
| OSBPL9   | 23.4653709 | 19.75269 |
| OSCAR    | 41.1818466 | 48.63383 |
| OSGEP    | 10.8456458 | 9.943122 |
| OSGEPL1  | 0.77165507 | 0.629098 |
| OSGIN1   | 0.25660837 | 0.291511 |
| OSGIN2   | 14.5272713 | 14.65774 |
| OSM      | 51.6896206 | 113.4831 |
| OSMR     | 0          | 0.005737 |
| OSR1     | 0          | 0        |
| OSR2     | 0.01122548 | 0.012752 |
| OSTalpha | 5.05763975 | 4.087555 |
| OSTbeta  | 0          | 0        |
| OSTC     | 5.79269322 | 4.763728 |
| OSTCL    | 0.66858793 | 0.699564 |
| OSTF1    | 124.758837 | 129.8673 |
| OSTF1P   | 0          | 0        |
| OSTM1    | 8.19926719 | 8.624733 |
| OSTN     | 0          | 0        |
| OTC      | 0          | 0.029004 |
| OTOA     | 0.01711696 | 0.019445 |
| OTOF     | 0          | 0.003206 |
| OTOG     | 0.0047861  | 0.010874 |
| OTOL1    | 0          | 0        |
| OTOP1    | 0.01124951 | 0        |
| OTOP2    | 0          | 0        |

|        |            |          |
|--------|------------|----------|
| OTOP3  | 0          | 0        |
| OTOR   | 0          | 0        |
| OTOS   | 0          | 0        |
| OTP    | 0.01570226 | 0        |
| OTUB1  | 26.1670967 | 25.6968  |
| OTUB2  | 0.09228779 | 0.049337 |
| OTUD1  | 10.5633208 | 11.50905 |
| OTUD3  | 3.24012775 | 3.024592 |
| OTUD4  | 6.60400159 | 6.28454  |
| OTUD5  | 57.870825  | 58.40304 |
| OTUD6A | 0.01244839 | 0        |
| OTUD6B | 1.51091675 | 1.54261  |
| OTUD7A | 0.01382336 | 0.054962 |
| OTUD7B | 2.05237131 | 1.791476 |
| OTX1   | 0.01932475 | 0.010977 |
| OTX2   | 0          | 0        |
| OVCA2  | 2.57931569 | 2.020023 |
| OVCH1  | 0.41189976 | 0.433005 |
| OVCH2  | 0          | 0        |
| OVGP1  | 0.23444838 | 0.351565 |
| OVOL1  | 0.00702483 | 0.047882 |
| OVOL2  | 0          | 0        |
| OVOS   | 0.0093989  | 0.005339 |
| OVOS2  | 0.02744224 | 0.015587 |
| OXA1L  | 38.2834706 | 34.63966 |
| OXCT1  | 3.38012628 | 4.511184 |
| OXCT2  | 0          | 0.013095 |
| OXCT2P | 0          | 0        |
| OXER1  | 18.7951909 | 8.088151 |
| OXGR1  | 0          | 0        |
| OXNAD1 | 1.61939555 | 1.461981 |
| OXR1   | 7.44602741 | 6.589831 |
| OXSM   | 1.52836394 | 1.26699  |
| OXSR1  | 8.86475926 | 6.711911 |
| OXT    | 1.72473418 | 2.192578 |
| OXTR   | 0.01928487 | 0.021908 |
| P11    | 0.00905874 | 0        |
| P2RX1  | 92.6759002 | 110.2935 |
| P2RX2  | 0.01101957 | 0        |
| P2RX3  | 0.01558586 | 0        |
| P2RX4  | 4.07443544 | 3.851297 |
| P2RX5  | 2.96245563 | 4.367855 |
| P2RX6  | 0.4325564  | 0.350994 |
| P2RX6P | 0          | 0        |
| P2RX7  | 0.01999239 | 0.015141 |
| P2RY1  | 0.01352111 | 0.00768  |
| P2RY10 | 210.07712  | 175.5756 |

|                |            |          |
|----------------|------------|----------|
| P2RY11         | 0.06380981 | 0.120815 |
| P2RY12         | 0          | 0        |
| P2RY13         | 6.20357364 | 3.398604 |
| P2RY14         | 18.9035086 | 6.042916 |
| P2RY2          | 44.9839161 | 46.38388 |
| P2RY4          | 0.08979702 | 0.102011 |
| P2RY5          | 0          | 0        |
| P2RY6          | 3.95185476 | 4.896738 |
| P2RY8 (NC_0000 | 24.3317939 | 44.5329  |
| P2RY8 (NC_0000 | 34.9611288 | 35.97148 |
| P4HA1          | 9.47708948 | 9.522355 |
| P4HA2          | 0.1165484  | 0.167708 |
| P4HA3          | 0          | 0.021053 |
| P4HB           | 82.4457218 | 78.99319 |
| P4HTM          | 3.13123632 | 3.00264  |
| P5.8           | 0          | 0        |
| P5-04          | 0          | 0        |
| P5-05          | 0          | 0        |
| P5-07          | 0          | 0        |
| P5-09          | 0          | 0        |
| P704P          | 0.13562695 | 0.125409 |
| PA2G4          | 13.4510876 | 12.56106 |
| PA2G4P         | 0          | 0        |
| PA2G4P2        | 0          | 0        |
| PA2G4P3        | 0          | 0        |
| PA2G4P4        | 0          | 0        |
| PA2G4P5        | 0          | 0        |
| PA2G4P6        | 0          | 0        |
| PAAF1          | 3.21017671 | 2.712505 |
| PABPC1         | 230.190616 | 227.0923 |
| PABPC1L        | 1.71836899 | 1.503337 |
| PABPC1L2A      | 0.02900046 | 0        |
| PABPC1L2B      | 0.00955697 | 0        |
| PABPC1P5       | 0          | 0        |
| PABPC3         | 0.32013878 | 0.314536 |
| PABPC4         | 25.5860691 | 25.21206 |
| PABPC4L        | 0          | 0        |
| PABPC5         | 0          | 0        |
| PABPCP1        | 0          | 0        |
| PABPCP2        | 0          | 0        |
| PABPCP3        | 0          | 0        |
| PABPCP5        | 0          | 0        |
| PABPN1         | 50.3857038 | 49.83302 |
| PACRG          | 0.0116162  | 0        |
| PACRGL         | 0.30427396 | 0.276528 |
| PACS1          | 40.6873885 | 44.65153 |
| PACS2          | 2.03877972 | 2.274593 |

|             |            |          |
|-------------|------------|----------|
| PACSIN1     | 0.07448747 | 0.067695 |
| PACSIN2     | 37.915348  | 32.25056 |
| PACSIN3     | 0.03439258 | 0.026047 |
| PADI1       | 0.03825769 | 0.037253 |
| PADI2       | 327.702167 | 409.0688 |
| PADI3       | 0          | 0        |
| PADI4       | 104.337625 | 90.04634 |
| PADI6       | 0.02688661 | 0.030544 |
| PAEP        | 0          | 0        |
| PAF1        | 27.5212021 | 25.95672 |
| PAFAH1B1    | 38.2643047 | 43.22209 |
| PAFAH1B2    | 21.0076775 | 18.73106 |
| PAFAH1B3    | 0.62887331 | 0.45246  |
| PAFAH1P1    | 0          | 0        |
| PAFAH1P2    | 0          | 0        |
| PAFAH2      | 79.2398399 | 99.57576 |
| PAG1        | 8.52637444 | 5.975724 |
| PAGE1       | 0          | 0        |
| PAGE2       | 0          | 0        |
| PAGE2B      | 0          | 0.048448 |
| PAGE3       | 0          | 0        |
| PAGE4       | 0          | 0.048448 |
| PAGE5       | 0          | 0        |
| PAH         | 0          | 0.008912 |
| PAICS       | 0.37641257 | 0.366523 |
| PAIP1       | 10.5419079 | 9.650381 |
| PAIP2       | 89.500578  | 87.22755 |
| PAIP2B      | 0.2402895  | 0.166817 |
| PAK1        | 37.6630821 | 35.18574 |
| PAK1IP1     | 1.03932832 | 1.308336 |
| PAK2        | 41.2834891 | 39.93821 |
| PAK3        | 0.01282423 | 0.007284 |
| PAK4        | 3.71923283 | 3.250682 |
| PAK6        | 0.28940929 | 0.236486 |
| PAK7        | 0.00440137 | 0        |
| PALB2       | 1.33156975 | 1.206616 |
| PALLD       | 0.10496378 | 0.053453 |
| PALM        | 0.01463141 | 0        |
| PALM2       | 0.00224558 | 0.002551 |
| PALM2-AKAP2 | 5.32414286 | 5.292272 |
| PALM3       | 0          | 0.010569 |
| PALMD       | 0          | 0.009265 |
| PAM         | 0.10123702 | 0.084742 |
| PAMR1       | 0          | 0        |
| PAN2        | 8.53271132 | 7.698343 |
| PAN3        | 29.3932144 | 28.42509 |
| PANK1       | 0.00590433 | 0        |

|        |            |          |
|--------|------------|----------|
| PANK2  | 12.4888588 | 11.20069 |
| PANK3  | 12.8380333 | 11.1497  |
| PANK4  | 8.18889688 | 7.467487 |
| PANX1  | 0.15945538 | 0.120763 |
| PANX2  | 55.4636106 | 67.67969 |
| PANX3  | 0          | 0.014928 |
| PAOX   | 0.27202585 | 0.592299 |
| PAP2D  | 0          | 0        |
| PAPD4  | 30.771106  | 28.92247 |
| PAPD5  | 3.05032144 | 3.745326 |
| PAPL   | 0          | 0.010335 |
| PAPLN  | 0.47211491 | 0.528142 |
| PAPOLA | 58.883983  | 61.61712 |
| PAPOLB | 0          | 0        |
| PAPOLG | 9.69294999 | 9.537164 |
| PAPPA  | 0          | 0        |
| PAPPA2 | 0.00819488 | 0.003103 |
| PAPPAS | 0          | 0        |
| PAPSS1 | 28.2543393 | 18.67962 |
| PAPSS2 | 0.12534542 | 0.123821 |
| PAQR3  | 1.85004918 | 1.533144 |
| PAQR4  | 0.70292711 | 0.958244 |
| PAQR5  | 0.05277064 | 0.077076 |
| PAQR6  | 1.56920278 | 1.647249 |
| PAQR7  | 8.23486333 | 6.439419 |
| PAQR8  | 0.17750385 | 0.080659 |
| PAQR9  | 0.01996708 | 0        |
| PAR1   | 0          | 0        |
| PAR4   | 0          | 0        |
| PAR5   | 0          | 0        |
| PARD3  | 0.00516466 | 0.005867 |
| PARD3B | 0          | 0        |
| PARD6A | 0.4827669  | 0.39714  |
| PARD6B | 0.79272104 | 0.828086 |
| PARD6G | 0.00548106 | 0.031133 |
| PARG   | 2.00712071 | 1.819604 |
| PARK2  | 0.10324248 | 0.0821   |
| PARK7  | 23.8695485 | 20.90258 |
| PARL   | 19.670299  | 13.76946 |
| PARN   | 9.64514858 | 9.599051 |
| PARP1  | 9.84523653 | 9.350256 |
| PARP10 | 20.9715425 | 23.51169 |
| PARP11 | 3.0517622  | 2.483158 |
| PARP12 | 21.0863383 | 21.61064 |
| PARP14 | 14.4924213 | 13.42065 |
| PARP15 | 0.1355016  | 0.059862 |
| PARP16 | 2.82107835 | 2.337611 |

|         |            |          |
|---------|------------|----------|
| PARP1P1 | 0          | 0        |
| PARP1P2 | 0          | 0        |
| PARP2   | 1.43734377 | 1.341718 |
| PARP3   | 0.43654289 | 0.263141 |
| PARP4   | 67.6355179 | 55.72319 |
| PARP4P1 | 0          | 0        |
| PARP6   | 17.4944205 | 15.63538 |
| PARP8   | 30.1581202 | 25.25875 |
| PARP9   | 8.44134847 | 7.587382 |
| PARS2   | 0.62708699 | 0.630966 |
| PAR-SN  | 0          | 0        |
| PART1   | 0          | 0        |
| PARVA   | 0.00676926 | 0.00769  |
| PARVB   | 0.58104804 | 0.757869 |
| PARVG   | 79.9383083 | 81.34313 |
| PASD1   | 0          | 0        |
| PASK    | 1.70801806 | 1.449979 |
| PATE1   | 0          | 0        |
| PATE2   | 0          | 0        |
| PATE3   | 0          | 0        |
| PATE4   | 0.01058677 | 0.012027 |
| PATL1   | 27.5314745 | 25.64902 |
| PATL2   | 4.79562905 | 4.235904 |
| PATZ1   | 9.55895263 | 8.598044 |
| PAWR    | 0.02155339 | 0.012242 |
| PAX1    | 0          | 0.008416 |
| PAX2    | 0.48489232 | 0.278262 |
| PAX3    | 0          | 0        |
| PAX4    | 0          | 0        |
| PAX5    | 0.03456219 | 0.104702 |
| PAX6    | 0.0559576  | 0.026766 |
| PAX7    | 0.00333048 | 0.003783 |
| PAX8    | 0.05703542 | 0.053013 |
| PAX9    | 0          | 0.00771  |
| PAXIP1  | 4.00455522 | 3.603357 |
| PBK     | 0.02268105 | 0        |
| PBLD    | 0.37571544 | 0.184118 |
| PBOV1   | 0          | 0        |
| PBPP1   | 0          | 0        |
| PBRM1   | 7.60774265 | 7.017216 |
| PBX1    | 0.19191159 | 0.196571 |
| PBX2    | 74.4295407 | 63.73079 |
| PBX2P1  | 0          | 0        |
| PBX3    | 6.47349965 | 7.807854 |
| PBX4    | 0.08772739 | 0.232539 |
| PBXIP1  | 127.99885  | 112.1682 |
| PC      | 0.02478818 | 0.011264 |



|         |            |          |
|---------|------------|----------|
| PCA3    | 0          | 0        |
| PCBD1   | 0.41799863 | 0.617309 |
| PCBD2   | 2.0600934  | 1.918442 |
| PCBP1   | 198.137628 | 204.8445 |
| PCBP2   | 111.226719 | 104.9182 |
| PCBP2P1 | 0          | 0        |
| PCBP2P2 | 0          | 0        |
| PCBP3   | 2.73783847 | 2.822021 |
| PCBP4   | 2.12498007 | 2.10801  |
| PCCA    | 0.39622717 | 0.249003 |
| PCCB    | 0.97360959 | 0.737357 |
| PCDH1   | 0          | 0.004468 |
| PCDH10  | 0.00359776 | 0.008174 |
| PCDH11X | 0.0036417  | 0.004137 |
| PCDH11Y | 0          | 0        |
| PCDH12  | 0.10143444 | 0.064529 |
| PCDH15  | 0.00506309 | 0.001917 |
| PCDH17  | 0.11025895 | 0.020876 |
| PCDH18  | 0          | 0        |
| PCDH19  | 0          | 0.002484 |
| PCDH20  | 0          | 0        |
| PCDH21  | 0.13819466 | 0.125593 |
| PCDH24  | 0.02053756 | 0.029164 |
| PCDH7   | 0.0021227  | 0.007234 |
| PCDH8   | 0.00525371 | 0.011937 |
| PCDH9   | 0.00675296 | 0        |
| PCDHA@  | 0          | 0        |
| PCDHA1  | 0          | 0        |
| PCDHA10 | 0          | 0        |
| PCDHA11 | 0          | 0        |
| PCDHA12 | 0          | 0        |
| PCDHA13 | 0          | 0        |
| PCDHA14 | 0          | 0        |
| PCDHA2  | 0          | 0        |
| PCDHA3  | 0          | 0        |
| PCDHA4  | 0.00391971 | 0        |
| PCDHA5  | 0          | 0        |
| PCDHA6  | 0          | 0        |
| PCDHA7  | 0          | 0        |
| PCDHA8  | 0          | 0        |
| PCDHA9  | 0          | 0        |
| PCDHAC1 | 0          | 0        |
| PCDHAC2 | 0          | 0        |
| PCDHACT | 0          | 0        |
| PCDHB1  | 0.00829729 | 0        |
| PCDHB10 | 0          | 0        |
| PCDHB11 | 0.0064278  | 0        |

|          |            |          |
|----------|------------|----------|
| PCDHB12  | 0          | 0.014017 |
| PCDHB13  | 0.00603309 | 0        |
| PCDHB14  | 0          | 0.008583 |
| PCDHB15  | 0          | 0        |
| PCDHB16  | 0          | 0        |
| PCDHB17  | 0          | 0        |
| PCDHB18  | 0          | 0        |
| PCDHB19P | 0          | 0        |
| PCDHB2   | 0          | 0        |
| PCDHB3   | 0          | 0        |
| PCDHB4   | 0.0058065  | 0        |
| PCDHB5   | 0.00723764 | 0        |
| PCDHB6   | 0          | 0.015766 |
| PCDHB7   | 0.00565958 | 0.012859 |
| PCDHB8   | 0          | 0        |
| PCDHB9   | 0.00498349 | 0        |
| PCDHGA1  | 0.00451866 | 0        |
| PCDHGA10 | 0          | 0        |
| PCDHGA11 | 0          | 0        |
| PCDHGA12 | 0          | 0        |
| PCDHGA2  | 0          | 0        |
| PCDHGA3  | 0          | 0        |
| PCDHGA4  | 0          | 0        |
| PCDHGA5  | 0          | 0        |
| PCDHGA6  | 0          | 0        |
| PCDHGA7  | 0          | 0        |
| PCDHGA8  | 0          | 0        |
| PCDHGA9  | 0          | 0        |
| PCDHGB1  | 0          | 0        |
| PCDHGB2  | 0          | 0        |
| PCDHGB3  | 0          | 0        |
| PCDHGB4  | 0          | 0        |
| PCDHGB5  | 0          | 0        |
| PCDHGB6  | 0          | 0        |
| PCDHGB7  | 0          | 0        |
| PCDHGB8P | 0          | 0        |
| PCDHGB9P | 0          | 0        |
| PCDHGC3  | 0          | 0        |
| PCDHGC4  | 0          | 0        |
| PCDHGC5  | 0          | 0        |
| PCDP1    | 0.00713691 | 0        |
| PCF11    | 28.6062553 | 26.69251 |
| PCGEM1   | 0          | 0        |
| PCGF1    | 5.778485   | 5.246288 |
| PCGF2    | 0.00807424 | 0.018345 |
| PCGF3    | 19.8675648 | 18.28269 |
| PCGF5    | 11.6233765 | 12.0012  |

|         |            |          |
|---------|------------|----------|
| PCGF6   | 2.21567389 | 2.334957 |
| PCGF7P  | 0          | 0        |
| PCID2   | 2.83639368 | 2.787449 |
| PCIF1   | 32.2513141 | 32.8387  |
| PCK1    | 0.00783066 | 0        |
| PCK2    | 2.06980885 | 1.775119 |
| PCLO    | 0.00188543 | 0        |
| PCM1    | 16.4793782 | 15.95241 |
| PCMT1   | 18.3692229 | 18.13416 |
| PCMTD1  | 24.5814548 | 25.64825 |
| PCMTD2  | 8.33596327 | 7.662529 |
| PCNA    | 8.57343593 | 7.553128 |
| PCNAP   | 0          | 0        |
| PCNAP1  | 0          | 0        |
| PCNAP2  | 0          | 0        |
| PCNP    | 25.8144863 | 24.61052 |
| PCNPP   | 0          | 0        |
| PCNT    | 2.92682164 | 2.770763 |
| PCNX    | 10.557421  | 9.752609 |
| PCNXL2  | 0.012337   | 0.017519 |
| PCNXL3  | 17.72071   | 17.77014 |
| PCOLCE  | 2.63465567 | 2.314791 |
| PCOLCE2 | 0.01100803 | 0.012505 |
| PCOTH   | 0          | 0        |
| PCP2    | 1.96554085 | 1.556254 |
| PCP4    | 0          | 0        |
| PCP4L1  | 1.22549331 | 1.29154  |
| PCSK1   | 0          | 0        |
| PCSK1N  | 0.21608768 | 0.098192 |
| PCSK2   | 0          | 0        |
| PCSK4   | 0.23703868 | 0.260304 |
| PCSK5   | 0.01872247 | 0.021269 |
| PCSK6   | 0.56239304 | 0.874455 |
| PCSK7   | 13.7292273 | 12.10709 |
| PCSK9   | 0          | 0.013138 |
| PCTK1   | 17.242844  | 16.10217 |
| PCTK2   | 20.8952559 | 22.56702 |
| PCTK3   | 0.02605369 | 0.036997 |
| PCTP    | 73.9492511 | 57.26544 |
| PCYOX1  | 1.57582451 | 1.710204 |
| PCYOX1L | 1.52697934 | 1.887171 |
| PCYT1A  | 27.5600516 | 25.78626 |
| PCYT1B  | 0.12351948 | 0.02631  |
| PCYT2   | 2.42075432 | 2.065739 |
| PDAP1   | 17.40788   | 17.771   |
| PDC     | 0          | 0.018261 |
| PDCD1   | 0.02986553 | 0.045237 |

|          |            |          |
|----------|------------|----------|
| PDCD10   | 16.6701796 | 15.02524 |
| PDCD11   | 1.85806775 | 1.593333 |
| PDCD1LG2 | 0.00869534 | 0        |
| PDCD2    | 6.73837391 | 6.451987 |
| PDCD2L   | 0.29050544 | 0.330019 |
| PDCD4    | 158.388909 | 174.3254 |
| PDCD5    | 3.67108953 | 3.075155 |
| PDCD6    | 34.3629858 | 33.88108 |
| PDCD6IP  | 27.9185614 | 28.95995 |
| PDCD7    | 6.98386125 | 6.509551 |
| PDCL     | 7.50411922 | 8.202615 |
| PDCL2    | 0          | 0        |
| PDCL3    | 12.4196141 | 10.10951 |
| PDDC1    | 1.29149409 | 1.363143 |
| PDE10A   | 0          | 0        |
| PDE11A   | 0.00429527 | 0.004879 |
| PDE12    | 3.59110336 | 3.834299 |
| PDE1A    | 0.00739027 | 0.008395 |
| PDE1B    | 7.57150387 | 9.29367  |
| PDE1C    | 0          | 0        |
| PDE2A    | 0.14684358 | 0.197147 |
| PDE3A    | 0.02549143 | 0.028959 |
| PDE3B    | 32.8824992 | 28.22215 |
| PDE4A    | 36.1661542 | 39.23273 |
| PDE4B    | 39.5742466 | 40.66379 |
| PDE4C    | 0.00728276 | 0.016547 |
| PDE4D    | 30.7768985 | 28.65474 |
| PDE4DIP  | 1.66338052 | 1.121966 |
| PDE5A    | 0.24305048 | 0.20625  |
| PDE6A    | 0.0149063  | 0.016934 |
| PDE6B    | 0.23124306 | 0.195338 |
| PDE6C    | 0.03539618 | 0.024126 |
| PDE6D    | 7.95502236 | 7.477449 |
| PDE6G    | 1.15094676 | 0.98062  |
| PDE6H    | 0.11600183 | 0.098835 |
| PDE7A    | 16.0627006 | 16.63741 |
| PDE7B    | 0.27320831 | 0.221692 |
| PDE8A    | 10.7273192 | 11.99742 |
| PDE8B    | 0.15914885 | 0.154011 |
| PDE9A    | 0.45542233 | 0.700601 |
| PDF      | 0.07262636 | 0        |
| PDGFA    | 0.02245496 | 0.076528 |
| PDGFB    | 0.01225252 | 0.041757 |
| PDGFC    | 0.22374812 | 0.270068 |
| PDGFD    | 2.23785767 | 2.2611   |
| PDGFRA   | 0.03837906 | 0.039966 |
| PDGFRB   | 0.05151464 | 0.045981 |

|         |            |          |
|---------|------------|----------|
| PDGFRL  | 0          | 0        |
| PDHA1   | 5.85571158 | 5.53279  |
| PDHA2   | 0          | 0        |
| PDHB    | 22.467702  | 20.30865 |
| PDHX    | 2.57539195 | 1.926476 |
| PDIA2   | 0.01218154 | 0.013838 |
| PDIA3   | 98.0424814 | 91.31714 |
| PDIA3P  | 0          | 0        |
| PDIA4   | 5.90447133 | 5.590993 |
| PDIA5   | 0          | 0.014226 |
| PDIA6   | 7.71290062 | 7.530786 |
| PDIK1L  | 2.06806534 | 1.433798 |
| PDILT   | 0          | 0        |
| PDK1    | 1.52543922 | 1.602432 |
| PDK2    | 1.94644985 | 1.282912 |
| PDK3    | 6.56156489 | 5.748729 |
| PDK4    | 19.1841939 | 16.18378 |
| PDLIM1  | 25.7603745 | 31.09012 |
| PDLIM1P | 0          | 0        |
| PDLIM2  | 14.6735689 | 12.93504 |
| PDLIM3  | 0          | 0        |
| PDLIM4  | 0.02748409 | 0.08326  |
| PDLIM5  | 3.54884345 | 3.60768  |
| PDLIM7  | 143.86233  | 180.9464 |
| PDP2    | 0.53249533 | 0.66105  |
| PDPK1   | 22.1730653 | 20.22774 |
| PDPK2   | 0          | 0        |
| PDPN    | 0          | 0        |
| PDPR    | 15.7630841 | 13.42511 |
| PDRG1   | 5.55877286 | 4.540432 |
| PDS5A   | 10.3354702 | 11.12164 |
| PDS5B   | 7.84544081 | 8.298549 |
| PDSS1   | 0.46751817 | 0.354072 |
| PDSS2   | 0.3669962  | 0.28915  |
| PDX1    | 0.00817152 | 0.018566 |
| PDXDC1  | 28.0337746 | 26.27898 |
| PDXDC2  | 0          | 0        |
| PDXK    | 10.9584674 | 16.09599 |
| PDXP    | 3.83804046 | 3.812087 |
| PDYN    | 0          | 0.018682 |
| PDZD11  | 2.88549887 | 1.706079 |
| PDZD2   | 0.09932943 | 0.067704 |
| PDZD3   | 4.46454396 | 5.136816 |
| PDZD4   | 0.0280712  | 0.019134 |
| PDZD7   | 0.05201715 | 0.094548 |
| PDZD8   | 31.5845733 | 28.88996 |
| PDZK1   | 0.21953359 | 0.215385 |

|          |            |          |
|----------|------------|----------|
| PDZK1IP1 | 0          | 0.026717 |
| PDZK1P1  | 0          | 0        |
| PDZK1P2  | 0          | 0        |
| PDZRN3   | 0.01515885 | 0        |
| PDZRN4   | 0          | 0        |
| PEA15    | 5.51819136 | 7.690831 |
| PEAR1    | 0.01728346 | 0.019634 |
| PEBP1    | 3.4266636  | 3.316041 |
| PEBP4    | 0.02351827 | 0.026717 |
| PECAM1   | 37.8706445 | 33.57788 |
| PECI     | 2.67125106 | 1.713071 |
| PECR     | 0.15766183 | 0.140726 |
| PEF1     | 18.2567781 | 16.91244 |
| PEG10    | 0.01588496 | 0.007218 |
| PEG3     | 0          | 0        |
| PEG3AS   | 0          | 0        |
| PELI1    | 34.9733804 | 31.38606 |
| PELI2    | 11.7233938 | 13.21732 |
| PELI3    | 1.15700619 | 0.861744 |
| PELO     | 0.41042598 | 0.359913 |
| PELP1    | 4.96161185 | 4.778322 |
| PEMT     | 0.22589199 | 0.414535 |
| PENK     | 0          | 0        |
| PEPD     | 0.49261743 | 0.67869  |
| PER1     | 8.02793482 | 6.751132 |
| PER2     | 1.81012783 | 2.056334 |
| PER3     | 0.89483917 | 0.773965 |
| PER4     | 0          | 0        |
| PERLD1   | 2.2066034  | 2.06228  |
| PERP     | 0.05376073 | 0.055521 |
| PES1     | 3.94108768 | 3.516243 |
| PET112L  | 0.20910324 | 0.201913 |
| PEX1     | 5.9256695  | 5.101886 |
| PEX10    | 0.49674118 | 0.449141 |
| PEX11A   | 0.1807853  | 0.123225 |
| PEX11B   | 8.81496795 | 7.447407 |
| PEX11G   | 10.0375168 | 7.152038 |
| PEX12    | 1.67701112 | 1.299749 |
| PEX13    | 2.94308066 | 2.634504 |
| PEX14    | 3.67888709 | 3.584007 |
| PEX16    | 12.4190503 | 10.97864 |
| PEX19    | 11.2318476 | 10.14255 |
| PEX26    | 3.61288978 | 3.049905 |
| PEX3     | 1.37945574 | 1.110735 |
| PEX5     | 1.7448003  | 1.561335 |
| PEX5L    | 0          | 0        |
| PEX6     | 2.78895185 | 3.769177 |

|         |            |          |
|---------|------------|----------|
| PEX7    | 0.63842098 | 0.257869 |
| PF4     | 0.22085432 | 0.250894 |
| PF4V1   | 0          | 0        |
| PFAS    | 0.40606025 | 0.390323 |
| PFDN1   | 10.7985083 | 8.857695 |
| PFDN2   | 19.3223447 | 17.41158 |
| PFDN4   | 0.98409796 | 0.532358 |
| PFDN5   | 128.722769 | 119.5994 |
| PFDN6   | 11.9285127 | 10.6156  |
| PFKFB1  | 0.01213233 | 0.041348 |
| PFKFB2  | 17.0975977 | 16.75328 |
| PFKFB3  | 13.7984345 | 18.76541 |
| PFKFB4  | 13.0308856 | 14.30369 |
| PFKL    | 33.7863283 | 39.97251 |
| PFKM    | 2.60196602 | 2.060901 |
| PFKP    | 2.91750579 | 2.903465 |
| PFN1    | 1094.02066 | 1344.018 |
| PFN2    | 0.06988477 | 0.15878  |
| PFN3    | 0          | 0.045066 |
| PFN4    | 0          | 0.030819 |
| PFTK1   | 1.80411178 | 1.72158  |
| PFTK2   | 0.64419202 | 0.404832 |
| PGA3    | 0          | 0        |
| PGA4    | 0          | 0        |
| PGA5    | 0.0309196  | 0        |
| PGAM1   | 116.739483 | 140.3806 |
| PGAM2   | 64.8407089 | 71.45485 |
| PGAM3P  | 0          | 0        |
| PGAM4   | 0.06264997 | 0.056937 |
| PGAM5   | 1.27869085 | 1.037581 |
| PGAP1   | 0.06054266 | 0.06018  |
| PGBD1   | 0.16463554 | 0.194821 |
| PGBD2   | 4.54035386 | 3.720752 |
| PGBD3   | 0.21296376 | 0.109968 |
| PGBD3P1 | 0          | 0        |
| PGBD3P2 | 0          | 0        |
| PGBD3P3 | 0          | 0        |
| PGBD3P4 | 0          | 0        |
| PGBD4   | 0.70749604 | 0.515209 |
| PGBD5   | 0          | 0        |
| PGC     | 0.01552831 | 0.035281 |
| PGCP    | 6.90863987 | 6.928697 |
| PGD     | 384.653925 | 304.9205 |
| PGDS    | 0.01301878 | 0.01479  |
| PGF     | 0.01214635 | 0.055194 |
| PGGT1B  | 12.0970826 | 10.6156  |
| PGK1    | 141.398171 | 153.1979 |

|         |            |          |
|---------|------------|----------|
| PGK1P1  | 0          | 0        |
| PGK1P2  | 0          | 0        |
| PGK2    | 0          | 0.029057 |
| PGLS    | 26.3528326 | 23.23832 |
| PGLYRP1 | 53.4774722 | 38.56234 |
| PGLYRP2 | 0.53624649 | 1.332591 |
| PGLYRP3 | 0.01792441 | 0        |
| PGLYRP4 | 0          | 0        |
| PGM1    | 11.9840984 | 14.32913 |
| PGM2    | 12.0580728 | 7.959244 |
| PGM2L1  | 1.79065282 | 2.582098 |
| PGM3    | 7.53917334 | 8.085481 |
| PGM5    | 0.00629878 | 0.014311 |
| PGM5P1  | 0          | 0        |
| PGM5P2  | 0          | 0        |
| PGP     | 1.84373916 | 1.134847 |
| PGPEP1  | 14.0891087 | 12.99115 |
| PGR     | 0.00161274 | 0.003664 |
| PGRMC1  | 8.60326695 | 8.788623 |
| PGRMC2  | 7.06523817 | 6.077734 |
| PGS1    | 85.6647951 | 80.28535 |
| PHACTR1 | 0.84101324 | 0.833201 |
| PHACTR2 | 3.03895178 | 4.356296 |
| PHACTR3 | 0.02844144 | 0.03231  |
| PHACTR4 | 10.6843141 | 10.69164 |
| PHAX    | 4.502855   | 4.365069 |
| PHB     | 2.15319654 | 1.360379 |
| PHB2    | 19.4517095 | 17.71107 |
| PHBP1   | 0          | 0        |
| PHC1    | 5.2329893  | 4.413603 |
| PHC1B   | 0          | 0        |
| PHC2    | 18.1296267 | 22.88394 |
| PHC3    | 12.9715939 | 11.84077 |
| PHEX    | 1.3962995  | 0.926685 |
| PHF1    | 122.058559 | 111.0129 |
| PHF10   | 20.3345345 | 25.11218 |
| PHF10P1 | 0          | 0        |
| PHF11   | 9.2745808  | 8.589598 |
| PHF12   | 53.1421465 | 50.34582 |
| PHF13   | 6.16437496 | 5.994056 |
| PHF14   | 0.67483049 | 0.651886 |
| PHF15   | 14.2294287 | 14.32811 |
| PHF16   | 0.06765995 | 0.105686 |
| PHF17   | 6.69478623 | 5.190002 |
| PHF19   | 4.03250807 | 5.49824  |
| PHF2    | 18.4271362 | 19.74127 |
| PHF20   | 31.6611708 | 27.30422 |



|          |            |          |
|----------|------------|----------|
| PHF20L1  | 17.3352109 | 19.12651 |
| PHF21A   | 9.21254286 | 8.910558 |
| PHF21B   | 0.01697416 | 0        |
| PHF23    | 21.7065641 | 22.18489 |
| PHF3     | 19.6845764 | 17.53477 |
| PHF5A    | 14.8460553 | 13.09756 |
| PHF5CP   | 0          | 0        |
| PHF5DP   | 0          | 0        |
| PHF5EP   | 0          | 0        |
| PHF5FP   | 0          | 0        |
| PHF5GP   | 0          | 0        |
| PHF5HP   | 0          | 0        |
| PHF6     | 3.32606512 | 3.120497 |
| PHF7     | 1.48729274 | 0.954985 |
| PHF8     | 17.787194  | 16.80789 |
| PHGDH    | 0          | 0        |
| PHIP     | 16.1529222 | 14.90274 |
| PHKA1    | 0.02388854 | 0        |
| PHKA1P1  | 0          | 0        |
| PHKA2    | 12.788929  | 11.86854 |
| PHKB     | 4.37566161 | 4.035384 |
| PHKBP1   | 0          | 0        |
| PHKBP2   | 0          | 0        |
| PHKG1    | 0.89625799 | 1.335296 |
| PHKG1P1  | 0          | 0        |
| PHKG1P2  | 0          | 0        |
| PHKG1P3  | 0          | 0        |
| PHKG1P4  | 0          | 0        |
| PHKG2    | 61.2826165 | 64.78323 |
| PHLDA1   | 0.03555781 | 0.008079 |
| PHLDA2   | 0.02285362 | 0.103848 |
| PHLDA3   | 0.13868952 | 0.141798 |
| PHLDB1   | 0.02173535 | 0.008231 |
| PHLDB2   | 0.04126348 | 0.021635 |
| PHLDB3   | 0.09292031 | 0.134348 |
| PHLPP    | 1.31024884 | 1.438682 |
| PHLPPL   | 0.62924655 | 0.772141 |
| PHOSPHO1 | 130.728599 | 173.6589 |
| PHOSPHO2 | 0          | 0.021231 |
| PHOX2A   | 0.01237512 | 0.014058 |
| PHOX2B   | 0.01387811 | 0        |
| PHPT1    | 0.80672733 | 0.687341 |
| PHRF1    | 22.2397218 | 30.26399 |
| PHTF1    | 16.3782402 | 19.81345 |
| PHTF2    | 7.95665111 | 4.734997 |
| PHYH     | 1.150586   | 0.961816 |
| PHYHD1   | 0.03935485 | 0.022354 |

|         |            |          |
|---------|------------|----------|
| PHYHIP  | 0.01890201 | 0.007158 |
| PHYHIPL | 0          | 0.0064   |
| PI15    | 0          | 0        |
| PI16    | 0          | 0.010906 |
| PI3     | 0          | 0.129342 |
| PI4K2A  | 0.61292482 | 0.753365 |
| PI4K2B  | 4.09880098 | 3.55524  |
| PI4KA   | 41.8199861 | 41.22592 |
| PI4KAP1 | 0          | 0        |
| PI4KAP2 | 0          | 0        |
| PI4KB   | 34.6606003 | 27.74554 |
| PIAS1   | 32.7734298 | 32.22246 |
| PIAS2   | 1.15523796 | 1.39986  |
| PIAS3   | 8.80281775 | 6.831372 |
| PIAS4   | 11.2086681 | 9.48804  |
| PIBF1   | 2.09308047 | 1.779494 |
| PICALM  | 42.3980983 | 41.28862 |
| PICK1   | 3.99166909 | 3.235907 |
| PID1    | 0.00745051 | 0.025392 |
| PIF1    | 0.00791021 | 0.035944 |
| PIGA    | 3.52269068 | 3.014625 |
| PIGAP1  | 0          | 0        |
| PIGB    | 6.90955346 | 6.74045  |
| PIGC    | 2.22868508 | 1.910809 |
| PIGCP1  | 0          | 0        |
| PIGF    | 9.83532693 | 7.399535 |
| PIGFP1  | 0          | 0        |
| PIGG    | 4.99432477 | 4.585941 |
| PIGH    | 10.3225895 | 9.700211 |
| PIGK    | 1.52713169 | 1.249502 |
| PIGL    | 4.07000764 | 3.649114 |
| PIGM    | 1.17239814 | 1.016858 |
| PIGN    | 0.83652875 | 0.778862 |
| PIGO    | 2.9926003  | 2.371571 |
| PIGP    | 0.21614826 | 0.200903 |
| PIGQ    | 4.14462376 | 3.84189  |
| PIGR    | 0.00492858 | 0        |
| PIGS    | 30.3853721 | 27.57637 |
| PIGT    | 27.0083022 | 26.85467 |
| PIGU    | 0.67712583 | 0.560622 |
| PIGV    | 1.5824562  | 1.100836 |
| PIGW    | 0.00932387 | 0        |
| PIGX    | 17.2767358 | 14.77891 |
| PIGY    | 8.53134272 | 7.732208 |
| PIGZ    | 0.21017547 | 0.256449 |
| PIH1D1  | 39.9245049 | 43.66796 |
| PIH1D2  | 0.0577619  | 0.016405 |

|         |            |          |
|---------|------------|----------|
| PIK3AP1 | 39.3279886 | 43.01901 |
| PIK3C2A | 8.0778865  | 7.096384 |
| PIK3C2B | 0.53074724 | 0.499307 |
| PIK3C2G | 0          | 0        |
| PIK3C3  | 13.0851685 | 12.98933 |
| PIK3CA  | 10.1388315 | 9.439508 |
| PIK3CB  | 56.6106873 | 59.8949  |
| PIK3CD  | 101.544072 | 95.19172 |
| PIK3CG  | 27.8266092 | 24.99078 |
| PIK3IP1 | 13.9261998 | 16.09082 |
| PIK3R1  | 20.5340424 | 18.08695 |
| PIK3R2  | 0.99307048 | 1.24945  |
| PIK3R3  | 3.10343532 | 1.478717 |
| PIK3R4  | 6.02511965 | 5.313595 |
| PIK3R5  | 55.4060262 | 54.36556 |
| PIK3R6  | 167.234376 | 180.3483 |
| PIKFYVE | 14.9657166 | 13.42665 |
| PILRA   | 17.9897589 | 15.73586 |
| PILRB   | 69.310187  | 65.85381 |
| PIM1    | 89.6118388 | 155.8219 |
| PIM2    | 65.3832994 | 54.94558 |
| PIM3    | 2.13876843 | 2.459795 |
| PIN1    | 35.2179566 | 37.85203 |
| PIN1L   | 0          | 0        |
| PIN4    | 3.61219505 | 3.16684  |
| PINK1   | 42.145513  | 41.82588 |
| PINX1   | 1.08440102 | 0.980955 |
| PION    | 6.70663433 | 6.597609 |
| PIP     | 0          | 0        |
| PIP4K2A | 51.3208965 | 44.94115 |
| PIP4K2B | 3.43330596 | 2.741871 |
| PIP4K2C | 20.9534249 | 20.16838 |
| PIP5K1A | 11.3107113 | 10.17642 |
| PIP5K1B | 20.5420811 | 22.49016 |
| PIP5K1C | 16.0928975 | 19.54064 |
| PIP5KL1 | 0.13540904 | 0.19578  |
| PIPOX   | 0.59275394 | 0.653573 |
| PIPSL   | 0          | 0        |
| PIR     | 0.03195339 | 0.01815  |
| PIRT    | 0          | 0.006891 |
| PISD    | 26.0560279 | 24.57162 |
| PISRT1  | 0          | 0        |
| PITPNA  | 30.1665281 | 34.05317 |
| PITPNB  | 12.4786238 | 10.6646  |
| PITPNC1 | 16.7065604 | 19.4888  |
| PITPNM1 | 66.5686058 | 78.07028 |
| PITPNM2 | 0.43074461 | 0.677265 |

|          |            |          |
|----------|------------|----------|
| PITPNM3  | 0.04410292 | 0.01002  |
| PITRM1   | 5.80995112 | 5.211045 |
| PITX1    | 0.0176461  | 0        |
| PITX2    | 0          | 0        |
| PITX3    | 0          | 0.034417 |
| PIWIL1   | 0.00617303 | 0.007013 |
| PIWIL2   | 0.01538814 | 0.011654 |
| PIWIL3   | 0          | 0        |
| PIWIL4   | 1.6759798  | 1.67248  |
| PJA1     | 0.28402236 | 0.45346  |
| PJA2     | 49.7975183 | 48.75623 |
| PKD1     | 3.33865243 | 3.311276 |
| PKD1L1   | 0.00467178 | 0.013268 |
| PKD1L2   | 0.00774889 | 0.008803 |
| PKD1L3   | 0.18674536 | 0.15391  |
| PKD1P1   | 0          | 0        |
| PKD1P2   | 0          | 0        |
| PKD1P3   | 0          | 0        |
| PKD1P4   | 0          | 0        |
| PKD1P5   | 0          | 0        |
| PKD1P6   | 0          | 0        |
| PKD2     | 7.78469532 | 9.056122 |
| PKD2L1   | 0.00689129 | 0.031314 |
| PKD2L2   | 1.09013213 | 1.378401 |
| PKDREJ   | 0.16468928 | 0.174617 |
| PKHD1    | 0          | 0.002744 |
| PKHD1L1  | 0.00299998 | 0.003408 |
| PKIA     | 0.00962698 | 0.010936 |
| PKIB     | 0.05786788 | 0        |
| PKIG     | 0.35213394 | 0.366694 |
| PKLR     | 0.01993552 | 0.015098 |
| PKM2     | 30.3057833 | 22.90146 |
| PKMYT1   | 0.27471268 | 0.501554 |
| PKN1     | 53.6695709 | 61.33507 |
| PKN2     | 16.6025713 | 14.30602 |
| PKN3     | 0.14942492 | 0.155603 |
| PKNOX1   | 3.37605294 | 3.456045 |
| PKNOX2   | 0.00563682 | 0.012807 |
| PKP1     | 0.00386282 | 0        |
| PKP2     | 1.98933071 | 2.211485 |
| PKP2P1   | 0          | 0        |
| PKP3     | 0.00748499 | 0        |
| PKP4     | 1.26399289 | 1.238217 |
| PL-5283  | 16.4633897 | 14.42859 |
| PLA1A    | 0.13193305 | 0.027251 |
| PLA2G10  | 0.23197456 | 0.263527 |
| PLA2G12A | 0.55023311 | 0.415195 |

|          |            |          |
|----------|------------|----------|
| PLA2G12B | 0          | 0.043746 |
| PLA2G15  | 2.39362931 | 2.236762 |
| PLA2G16  | 0.04420182 | 0.050214 |
| PLA2G1B  | 0          | 0        |
| PLA2G2A  | 0          | 0        |
| PLA2G2C  | 0          | 0        |
| PLA2G2D  | 0.01598884 | 0        |
| PLA2G2E  | 0          | 0        |
| PLA2G2F  | 0          | 0        |
| PLA2G3   | 0          | 0        |
| PLA2G4A  | 1.45769883 | 0.628126 |
| PLA2G4B  | 0.02306252 | 0.087331 |
| PLA2G4C  | 0.02602145 | 0.009854 |
| PLA2G4D  | 0.00586644 | 0        |
| PLA2G4E  | 0          | 0        |
| PLA2G4F  | 0.01237148 | 0.007027 |
| PLA2G5   | 0          | 0        |
| PLA2G6   | 3.11824642 | 2.727186 |
| PLA2G7   | 0.01143302 | 0        |
| PLA2R1   | 0.00358672 | 0.004075 |
| PLAA     | 7.14708465 | 6.412433 |
| PLAC1    | 0          | 0.021212 |
| PLAC1L   | 0.01287528 | 0        |
| PLAC2    | 0          | 0        |
| PLAC4    | 0          | 0        |
| PLAC8    | 7.26032555 | 6.345388 |
| PLAC8L1  | 0.11600183 | 0.06589  |
| PLAC9    | 1.65578386 | 1.951978 |
| PLAG1    | 1.28937026 | 1.188071 |
| PLAGL1   | 38.7698245 | 41.73274 |
| PLAGL2   | 6.587144   | 7.039688 |
| PLAT     | 0.26505302 | 1.053866 |
| PLAU     | 0.16407728 | 0.372789 |
| PLAUR    | 246.693014 | 183.9667 |
| PLB1     | 5.85951846 | 4.741168 |
| PLBD1    | 0.08706141 | 0.049452 |
| PLBD2    | 0.60587013 | 0.651074 |
| PLCB1    | 0.33280606 | 0.269552 |
| PLCB2    | 198.569573 | 196.9743 |
| PLCB3    | 3.18359262 | 4.577173 |
| PLCB4    | 0.00380342 | 0.012962 |
| PLCD1    | 0.05385932 | 0.053537 |
| PLCD3    | 15.5182625 | 17.78781 |
| PLCD4    | 0.708107   | 0.83536  |
| PLCE1    | 0.01578478 | 0.02092  |
| PLCG1    | 3.79708186 | 4.584289 |
| PLCG2    | 72.4360082 | 70.92317 |

|                |            |          |
|----------------|------------|----------|
| PLCH1          | 0          | 0        |
| PLCH2          | 0.08693542 | 0.09876  |
| PLCL1          | 0.07520985 | 0.094933 |
| PLCL2          | 38.7674126 | 39.48355 |
| PLCXD1 (NC_000 | 0.91765233 | 0.400949 |
| PLCXD1 (NC_000 | 0.22987167 | 0.270143 |
| PLCXD2         | 1.20569059 | 0.700569 |
| PLCXD3         | 0          | 0        |
| PLCZ1          | 0          | 0        |
| PLD1           | 6.58991689 | 4.522498 |
| PLD2           | 0.74506359 | 0.426643 |
| PLD3           | 54.5899692 | 53.99132 |
| PLD4           | 21.6884877 | 24.77432 |
| PLD5           | 0.01540882 | 0        |
| PLD6           | 0.18867835 | 0.12115  |
| PLDN           | 16.5492455 | 15.29714 |
| PLEC1          | 27.9189455 | 46.08759 |
| PLEK           | 95.7050654 | 67.56839 |
| PLEK2          | 0.01440091 | 0        |
| PLEKHA1        | 0.84743826 | 0.811691 |
| PLEKHA2        | 170.863893 | 198.8549 |
| PLEKHA3        | 5.76281338 | 5.889082 |
| PLEKHA3P1      | 0          | 0        |
| PLEKHA4        | 0.06880017 | 0.031263 |
| PLEKHA5        | 0.03989626 | 0.020143 |
| PLEKHA6        | 0.06251619 | 0.032282 |
| PLEKHA7        | 0.75763013 | 0.651729 |
| PLEKHA8        | 0.62556456 | 0.445663 |
| PLEKHA9        | 0.62881631 | 0.350679 |
| PLEKHB1        | 0.09451221 | 0.123885 |
| PLEKHB2        | 33.8416074 | 37.03079 |
| PLEKHF1        | 0.12083524 | 0.398085 |
| PLEKHF2        | 14.5936238 | 14.70427 |
| PLEKHG1        | 0.04067357 | 0.07591  |
| PLEKHG2        | 0.17412855 | 0.200953 |
| PLEKHG3        | 54.6897529 | 37.89047 |
| PLEKHG4        | 0.04326836 | 0.070219 |
| PLEKHG4B       | 0.00182591 | 0.002074 |
| PLEKHG5        | 0.07076728 | 0.029618 |
| PLEKHG6        | 0.07047597 | 0.133436 |
| PLEKHG7        | 0          | 0.007311 |
| PLEKHH1        | 0.06429765 | 0.065739 |
| PLEKHH2        | 0.11186903 | 0.154563 |
| PLEKHH3        | 0.02059961 | 0.015601 |
| PLEKHJ1        | 16.456864  | 15.4516  |
| PLEKHM1        | 30.5013114 | 30.5065  |
| PLEKHM1P       | 0          | 0        |

|         |            |          |
|---------|------------|----------|
| PLEKHM2 | 16.3734382 | 18.30496 |
| PLEKHM3 | 0.92831328 | 0.713606 |
| PLEKHN1 | 0.06122185 | 0.059613 |
| PLEKHO1 | 1.11961515 | 1.109216 |
| PLEKHO2 | 31.8459461 | 44.11781 |
| PLG     | 0.03822787 | 0.078169 |
| PLGLA   | 0          | 0        |
| PLGLB1  | 0.02793136 | 0.111057 |
| PLGLB2  | 0.56467235 | 0.562282 |
| PLIN    | 0.00708878 | 0.008053 |
| PLK1    | 0.80456545 | 0.858939 |
| PLK2    | 2.78476207 | 2.494819 |
| PLK3    | 7.34727426 | 27.51143 |
| PLK4    | 0.68339215 | 0.601041 |
| PLK5P   | 0          | 0        |
| PLLP    | 0          | 0        |
| PLN     | 0          | 0        |
| PLOD1   | 0.56692803 | 0.747404 |
| PLOD2   | 0.01035731 | 0.023532 |
| PLOD3   | 2.25296627 | 2.053943 |
| PLP1    | 0.01329455 | 0        |
| PLP2    | 165.509414 | 229.1325 |
| PLRG1   | 10.8605327 | 9.404008 |
| PLS1    | 0.44292635 | 0.3106   |
| PLS3    | 0.00674754 | 0.007665 |
| PLSCR1  | 18.4280842 | 16.2008  |
| PLSCR2  | 0.01662081 | 0.056645 |
| PLSCR3  | 3.03458385 | 3.556775 |
| PLSCR4  | 0.00574463 | 0.03263  |
| PLSCR5  | 0          | 0        |
| PLTP    | 1.02415652 | 0.985517 |
| PLUNC   | 0          | 0        |
| PLVAP   | 0.02771353 | 0.07346  |
| PLXDC1  | 0.01345191 | 0.015282 |
| PLXDC2  | 9.09422565 | 8.167345 |
| PLXNA1  | 0.18927004 | 0.18316  |
| PLXNA2  | 1.99891298 | 2.26871  |
| PLXNA3  | 2.48090179 | 2.552796 |
| PLXNA4  | 0.00818531 | 0.010848 |
| PLXNB1  | 0.06575777 | 0.129916 |
| PLXNB2  | 0.0630594  | 0.101799 |
| PLXNB3  | 0.12659679 | 0.081625 |
| PLXNC1  | 63.4989634 | 73.64731 |
| PLXND1  | 0.13862193 | 0.191711 |
| PM20D1  | 0.11740529 | 0.044458 |
| PM20D2  | 2.00964293 | 1.329205 |
| PMAIP1  | 3.37751959 | 1.714892 |

|          |            |          |
|----------|------------|----------|
| PMCH     | 0.05554909 | 0        |
| PMCHL1   | 0          | 0        |
| PMCHL2   | 0          | 0        |
| PMEPA1   | 1.53656005 | 4.034585 |
| PMF1     | 13.777227  | 12.62688 |
| PMFBP1   | 0.13005359 | 0.070354 |
| PML      | 6.05477166 | 5.707144 |
| PMM1     | 7.65302382 | 6.404114 |
| PMM2     | 0.95034858 | 1.120739 |
| PMP2     | 0          | 0        |
| PMP22    | 29.7294795 | 27.09302 |
| PMPCA    | 11.7559903 | 11.0928  |
| PMPCB    | 10.1880846 | 9.733228 |
| PMS1     | 0.68671203 | 0.651227 |
| PMS2     | 5.38977983 | 5.002734 |
| PMS2CL   | 0          | 0        |
| PMS2L1   | 0          | 0        |
| PMS2L11  | 0          | 0        |
| PMS2L12  | 0          | 0        |
| PMS2L2   | 0          | 0        |
| PMS2L3   | 4.27151193 | 4.88845  |
| PMS2L4   | 0          | 0        |
| PMS2L5   | 0.51350876 | 0.550946 |
| PMVK     | 1.32723413 | 1.103238 |
| PNCK     | 0.03253017 | 0        |
| PNKD     | 1.37649068 | 1.467585 |
| PNKP     | 18.3542808 | 16.78639 |
| PNLDC1   | 0.03285208 | 0.01244  |
| PNLIP    | 0          | 0        |
| PNLIPRP1 | 0          | 0        |
| PNLIPRP2 | 0.01419671 | 0        |
| PNLIPRP3 | 0.00910582 | 0        |
| PNMA1    | 3.64343609 | 4.861971 |
| PNMA2    | 0          | 0        |
| PNMA3    | 0.13452624 | 0.089147 |
| PNMA5    | 0.02616718 | 0        |
| PNMA6A   | 0.29600114 | 0.094574 |
| PNMAL1   | 0          | 0.012925 |
| PNMAL2   | 0.12022108 | 0.141631 |
| PNMT     | 0.03634457 | 0.082576 |
| PNN      | 44.0913901 | 41.24586 |
| PNO1     | 0.85036728 | 0.821126 |
| PNOC     | 0.05273912 | 0        |
| PNPLA1   | 0.97077326 | 1.654221 |
| PNPLA10P | 0          | 0        |
| PNPLA2   | 136.78642  | 178.1239 |
| PNPLA3   | 0.02998265 | 0.034061 |



|          |            |          |
|----------|------------|----------|
| PNPLA4   | 0.57256158 | 0.444604 |
| PNPLA4P1 | 0          | 0        |
| PNPLA5   | 0          | 0.009539 |
| PNPLA6   | 162.689736 | 163.3771 |
| PNPLA7   | 0.12686945 | 0.094427 |
| PNPLA8   | 10.7032634 | 9.276625 |
| PNPO     | 0.9162554  | 0.765151 |
| PNPT1    | 0.75762822 | 0.698975 |
| PNRC1    | 309.840238 | 327.7512 |
| PNRC2    | 60.6402905 | 60.36005 |
| PODN     | 0.00698516 | 0        |
| PODNL1   | 0          | 0.022065 |
| PODXL    | 0.79055807 | 0.977916 |
| PODXL2   | 0.36801593 | 0.429074 |
| POF1B    | 0          | 0        |
| POFUT1   | 3.16665131 | 3.647978 |
| POFUT2   | 9.4380762  | 7.765261 |
| POGK     | 15.5288335 | 16.7295  |
| POGZ     | 14.432404  | 14.34002 |
| POL3S    | 5.85764891 | 6.442384 |
| POLA1    | 1.44722818 | 1.196886 |
| POLA2    | 3.76028325 | 3.374965 |
| POLB     | 15.3473226 | 14.30451 |
| POLD1    | 1.31141461 | 1.302698 |
| POLD2    | 0.7699417  | 0.941948 |
| POLD3    | 6.82250535 | 5.849415 |
| POLD4    | 110.257019 | 115.0544 |
| POLDIP2  | 8.64975932 | 8.113912 |
| POLDIP3  | 29.5089143 | 28.31446 |
| POLE     | 3.79743222 | 3.820399 |
| POLE2    | 0.22393844 | 0.211998 |
| POLE3    | 27.7556618 | 29.89851 |
| POLE4    | 10.4522479 | 9.746223 |
| POLG     | 21.4980228 | 20.68468 |
| POLG2    | 12.7030815 | 13.22076 |
| POLH     | 2.33698103 | 2.447571 |
| POLI     | 5.03941574 | 4.916595 |
| POLK     | 2.3485742  | 1.916314 |
| POLL     | 5.35647206 | 4.095355 |
| POLM     | 17.8968002 | 19.00967 |
| POLN     | 0.3843886  | 0.230694 |
| POLQ     | 0.02634153 | 0.024484 |
| POLR1A   | 0.44350555 | 0.2951   |
| POLR1B   | 0.83961388 | 0.666787 |
| POLR1C   | 0.99355282 | 0.746928 |
| POLR1D   | 8.21823452 | 8.407179 |
| POLR1E   | 0.48764252 | 0.283426 |

|            |            |          |
|------------|------------|----------|
| POLR2A     | 55.1467862 | 61.91119 |
| POLR2B     | 35.7004286 | 33.09375 |
| POLR2C     | 21.5614536 | 21.01201 |
| POLR2CP    | 0          | 0        |
| POLR2D     | 6.22168933 | 6.256358 |
| POLR2E     | 29.4912179 | 33.42749 |
| POLR2F     | 6.38161806 | 5.499711 |
| POLR2G     | 49.1847049 | 44.20315 |
| POLR2H     | 2.86825465 | 2.356509 |
| POLR2I     | 4.31597964 | 3.643027 |
| POLR2J     | 36.8642702 | 38.40686 |
| POLR2J2    | 4.96806245 | 3.762532 |
| POLR2J3    | 2.99110363 | 4.620631 |
| POLR2J4    | 0          | 0        |
| POLR2K     | 17.4525404 | 19.30979 |
| POLR2L     | 23.0654601 | 26.44812 |
| POLR3A     | 1.49939961 | 1.392482 |
| POLR3B     | 1.0963671  | 0.668036 |
| POLR3C     | 12.8582791 | 10.24569 |
| POLR3D     | 1.15535774 | 1.015334 |
| POLR3E     | 4.2163528  | 3.489351 |
| POLR3F     | 4.6365052  | 4.191537 |
| POLR3G     | 0.18561175 | 0.210858 |
| POLR3GL    | 27.8292363 | 22.65497 |
| POLR3H     | 1.02940923 | 0.726218 |
| POLR3K     | 15.2671373 | 20.1043  |
| POLRMT     | 3.12060175 | 3.941043 |
| POLRMTL    | 0          | 0        |
| POLS       | 11.8005419 | 14.59955 |
| POM121     | 19.0865269 | 18.52022 |
| POM121B    | 0          | 0        |
| POM121C    | 37.3277622 | 35.23084 |
| POM121L10P | 0          | 0        |
| POM121L11P | 0          | 0        |
| POM121L1P  | 0          | 0        |
| POM121L2   | 0          | 0        |
| POM121L3P  | 0          | 0        |
| POM121L4P  | 0          | 0        |
| POM121L6P  | 0          | 0        |
| POM121L7   | 0          | 0        |
| POM121L8P  | 0          | 0        |
| POM121L9P  | 0          | 0        |
| POMC       | 0.2110651  | 0.239773 |
| POMGNT1    | 1.70600273 | 1.702338 |
| POMP       | 12.5657999 | 12.06531 |
| POMT1      | 9.41979535 | 10.89855 |
| POMT2      | 1.389035   | 1.401547 |

|          |            |          |
|----------|------------|----------|
| POMZP3   | 3.0481311  | 2.83174  |
| PON1     | 0          | 0        |
| PON2     | 0          | 0.086645 |
| PON3     | 0.01765351 | 0        |
| POP1     | 0.66798553 | 0.76621  |
| POP4     | 13.2262235 | 13.624   |
| POP5     | 0.65622132 | 1.01385  |
| POP7     | 4.96306096 | 5.151188 |
| POPDC2   | 1.98231527 | 1.380222 |
| POPDC3   | 0          | 0        |
| POR      | 85.43907   | 87.86547 |
| PORCN    | 7.94315107 | 7.27214  |
| POSTN    | 0.00622051 | 0        |
| POT1     | 1.81306137 | 1.439426 |
| POTEA    | 0          | 0        |
| POTEB    | 0.01040343 | 0.011818 |
| POTEC    | 0.00937375 | 0        |
| POTED    | 0          | 0        |
| POTEE    | 0.01833604 | 0.069433 |
| POTEF    | 0.74845751 | 0.880198 |
| POTEG    | 0          | 0        |
| POTEH    | 0          | 0        |
| POU1F1   | 0.03138109 | 0        |
| POU2AF1  | 0.13175504 | 0.10241  |
| POU2F1   | 2.83830239 | 2.353869 |
| POU2F2   | 1.22061527 | 1.174938 |
| POU2F3   | 0          | 0.008056 |
| POU3F1   | 0.08616939 | 0.057102 |
| POU3F2   | 0.01028888 | 0.011688 |
| POU3F3   | 0          | 0.031783 |
| POU3F4   | 0          | 0        |
| POU4F1   | 0.03305004 | 0.02503  |
| POU4F2   | 0.01338767 | 0.007604 |
| POU4F3   | 0.06202163 | 0        |
| POU5F1   | 0.03932419 | 0.119128 |
| POU5F1B  | 0.11834145 | 0        |
| POU5F1P2 | 0          | 0        |
| POU5F1P3 | 0          | 0        |
| POU5F1P4 | 0          | 0        |
| POU5F1P5 | 0          | 0        |
| POU5F1P6 | 0          | 0        |
| POU5F1P7 | 0          | 0        |
| POU5F2   | 0          | 0        |
| POU6F1   | 0.84566664 | 0.798034 |
| POU6F2   | 0.00945809 | 0.010745 |
| PP14571  | 0          | 0        |
| PP1P     | 0          | 0        |

|             |            |          |
|-------------|------------|----------|
| PP2672      | 0          | 0        |
| PP8961      | 0          | 0        |
| PPA1        | 1.32417599 | 1.651044 |
| PPA2        | 5.17778623 | 4.497196 |
| PPAN        | 0.21506055 | 0.201198 |
| PPAN-P2RY11 | 0.43196697 | 0.610898 |
| PPAP2A      | 0.75681731 | 0.429878 |
| PPAP2B      | 0.01276584 | 0        |
| PPAP2C      | 0.02750207 | 0.062486 |
| PPAPDC1A    | 0.01382336 | 0.031407 |
| PPAPDC1B    | 9.82462193 | 13.77847 |
| PPAPDC2     | 0.11361206 | 0.112932 |
| PPAPDC3     | 0.01003596 | 0.034203 |
| PPARA       | 17.3868544 | 16.54535 |
| PPARD       | 12.5978023 | 15.12925 |
| PPARG       | 0          | 0.010555 |
| PPARGC1A    | 0          | 0        |
| PPARGC1B    | 0.01284382 | 0.014591 |
| PPAT        | 0.19644596 | 0.140276 |
| PPBP        | 0.20995338 | 0.102219 |
| PPBPL1      | 0          | 0        |
| PPBPL2      | 0          | 0        |
| PPCDC       | 43.3298055 | 29.20248 |
| PPCS        | 33.2253887 | 30.12507 |
| PPEF1       | 0.029273   | 0.024941 |
| PPEF2       | 0.06774418 | 0.048974 |
| PPFIA1      | 8.34017749 | 8.185396 |
| PPFIA2      | 0          | 0        |
| PPFIA3      | 0.00890715 | 0.005059 |
| PPFIA4      | 0.50427454 | 0.340878 |
| PPFIBP1     | 0.02374211 | 0.019265 |
| PPFIBP2     | 9.58273298 | 12.74409 |
| PPHLN1      | 12.7390119 | 12.06498 |
| PPIA        | 36.9051833 | 34.13808 |
| PPIAL       | 0          | 0        |
| PPIAL3      | 0          | 0        |
| PPIAL4A     | 0          | 0        |
| PPIAL4B     | 0.00545546 | 0.018592 |
| PPIAL4C     | 0          | 0.006197 |
| PPIAL4D     | 0          | 0        |
| PPIAL4E     | 0.02678386 | 0.030427 |
| PPIAL4F     | 0          | 0        |
| PPIAL4G     | 0          | 0.064729 |
| PPIAP       | 0          | 0        |
| PPIAP10     | 0          | 0        |
| PPIAP11     | 0          | 0        |
| PPIAP13     | 0          | 0        |

|         |            |          |
|---------|------------|----------|
| PPIAP14 | 0          | 0        |
| PPIAP15 | 0          | 0        |
| PPIAP16 | 0          | 0        |
| PPIAP17 | 0          | 0        |
| PPIAP18 | 0          | 0        |
| PPIAP19 | 0          | 0        |
| PPIAP2  | 0          | 0        |
| PPIAP3  | 0          | 0        |
| PPIAP4  | 0          | 0        |
| PPIAP5  | 0          | 0        |
| PPIAP6  | 0          | 0        |
| PPIAP7  | 0          | 0        |
| PPIAP8  | 0          | 0        |
| PPIAP9  | 0          | 0        |
| PPIB    | 72.6887415 | 78.92774 |
| PPIC    | 0          | 0        |
| PPID    | 11.37248   | 9.949958 |
| PPIE    | 3.04495291 | 2.723466 |
| PPIF    | 51.870762  | 88.07431 |
| PPIG    | 29.7276113 | 28.77511 |
| PPIH    | 7.83193578 | 7.075964 |
| PPIHP1  | 0          | 0        |
| PPIHP2  | 0          | 0        |
| PPIL1   | 1.27096128 | 0.921302 |
| PPIL1P1 | 0          | 0        |
| PPIL2   | 12.1169874 | 11.4942  |
| PPIL3   | 4.65183913 | 4.90809  |
| PPIL4   | 9.90329736 | 9.981981 |
| PPIL5   | 5.81961883 | 6.227923 |
| PPIL6   | 0.08758122 | 0.218886 |
| PPL     | 0.13482097 | 0.325462 |
| PPM1A   | 12.2173474 | 13.66986 |
| PPM1B   | 15.6674499 | 14.30909 |
| PPM1D   | 9.02699951 | 9.310888 |
| PPM1E   | 0.00642976 | 0.010956 |
| PPM1F   | 52.6429224 | 54.62368 |
| PPM1G   | 24.8421798 | 23.30203 |
| PPM1H   | 1.31556659 | 1.055398 |
| PPM1J   | 0.03680046 | 0.013935 |
| PPM1K   | 3.18343266 | 4.039629 |
| PPM1L   | 1.83008444 | 1.672583 |
| PPM1M   | 16.8449159 | 24.65522 |
| PPM2C   | 4.50650104 | 4.044371 |
| PPME1   | 3.20565584 | 2.814022 |
| PPOX    | 2.92547026 | 2.012942 |
| PPP1CA  | 117.101161 | 121.9046 |
| PPP1CB  | 49.6143964 | 50.10712 |

|            |            |          |
|------------|------------|----------|
| PPP1CC     | 36.0893921 | 39.79569 |
| PPP1R10    | 14.167323  | 12.75916 |
| PPP1R11    | 36.4026313 | 34.80853 |
| PPP1R11P2  | 0          | 0        |
| PPP1R12A   | 31.7042465 | 27.97178 |
| PPP1R12B   | 1.7506054  | 1.504364 |
| PPP1R12BP1 | 0          | 0        |
| PPP1R12BP2 | 0          | 0        |
| PPP1R12C   | 64.5788295 | 67.99578 |
| PPP1R13B   | 3.47242308 | 4.700921 |
| PPP1R13L   | 0.0330795  | 0.067642 |
| PPP1R14A   | 0          | 0        |
| PPP1R14B   | 5.53858769 | 7.598708 |
| PPP1R14BP1 | 0          | 0        |
| PPP1R14C   | 0.02852826 | 0.010803 |
| PPP1R14D   | 0.048168   | 0.109439 |
| PPP1R15A   | 32.6276433 | 25.50886 |
| PPP1R15B   | 30.9739994 | 31.4559  |
| PPP1R16A   | 1.28518954 | 1.165896 |
| PPP1R16B   | 50.0760082 | 53.11199 |
| PPP1R1A    | 0.03439258 | 0.026047 |
| PPP1R1B    | 0.08209012 | 0.373023 |
| PPP1R1C    | 0.02073504 | 0        |
| PPP1R2     | 25.5372566 | 28.58359 |
| PPP1R2P1   | 0          | 0        |
| PPP1R2P2   | 0          | 0        |
| PPP1R2P3   | 0          | 0        |
| PPP1R2P4   | 0          | 0        |
| PPP1R2P9   | 0          | 0        |
| PPP1R3A    | 0          | 0.00556  |
| PPP1R3B    | 19.9479812 | 24.51208 |
| PPP1R3C    | 0          | 0        |
| PPP1R3D    | 20.3944497 | 25.42875 |
| PPP1R3E    | 0          | 0        |
| PPP1R3F    | 0.70060606 | 0.698443 |
| PPP1R3G    | 0.01211137 | 0        |
| PPP1R7     | 17.4804569 | 17.45663 |
| PPP1R8     | 11.0399817 | 9.652609 |
| PPP1R8P    | 0          | 0        |
| PPP1R9A    | 0.11932651 | 0.130627 |
| PPP1R9B    | 78.0124462 | 81.77124 |
| PPP2CA     | 29.2429499 | 27.44573 |
| PPP2CB     | 4.9948502  | 5.140755 |
| PPP2CBP    | 0          | 0        |
| PPP2R1A    | 28.4899455 | 27.27708 |
| PPP2R1B    | 2.59373234 | 2.552297 |
| PPP2R2A    | 21.2388764 | 20.96391 |

|                |            |          |
|----------------|------------|----------|
| PPP2R2B        | 0          | 0        |
| PPP2R2C        | 0          | 0.00527  |
| PPP2R2D        | 22.5217958 | 23.29011 |
| PPP2R3A        | 0.22178004 | 0.165754 |
| PPP2R3B (NC_00 | 1.46843581 | 2.303207 |
| PPP2R3B (NC_00 | 8.26799907 | 7.23642  |
| PPP2R3C        | 20.4635855 | 20.86366 |
| PPP2R4         | 9.0659017  | 8.225992 |
| PPP2R5A        | 26.0934574 | 23.54913 |
| PPP2R5B        | 17.0452591 | 14.32225 |
| PPP2R5C        | 21.3629154 | 20.8171  |
| PPP2R5CP       | 0          | 0        |
| PPP2R5D        | 10.6943483 | 10.31973 |
| PPP2R5E        | 6.79606657 | 6.414777 |
| PPP3CA         | 20.9039272 | 22.68983 |
| PPP3CB         | 10.9198227 | 10.81275 |
| PPP3CC         | 6.41613572 | 5.444801 |
| PPP3R1         | 64.6750632 | 66.16596 |
| PPP3R2         | 0          | 0        |
| PPP4C          | 84.8443243 | 93.76252 |
| PPP4R1         | 16.9485585 | 15.26696 |
| PPP4R1L        | 0          | 0        |
| PPP4R2         | 23.2256563 | 21.15678 |
| PPP4R4         | 0.00486472 | 0.049738 |
| PPP5C          | 1.4785029  | 1.413183 |
| PPP6C          | 16.6752625 | 15.89046 |
| PPP6CP         | 0          | 0        |
| PPPDE1         | 7.23275495 | 7.632964 |
| PPPDE2         | 15.6067222 | 12.79216 |
| PPRC1          | 1.54401082 | 1.378159 |
| PPT1           | 49.5153261 | 47.86561 |
| PPT2           | 0.11806881 | 0.072223 |
| PPTC7          | 9.61510599 | 8.679701 |
| PPWD1          | 25.5250324 | 24.15834 |
| PPY            | 0          | 0        |
| PPY2           | 0          | 0        |
| PPYR1          | 0.01074915 | 0        |
| PQBP1          | 19.9033295 | 17.1426  |
| PQLC1          | 21.0167176 | 22.62285 |
| PQLC2          | 3.39388934 | 3.442422 |
| PQLC3          | 5.31512841 | 3.633529 |
| PRAC           | 0          | 0        |
| PRAF2          | 7.50785769 | 7.659121 |
| PRAGMIN        | 6.4207462  | 5.167278 |
| PRAM1          | 3.56740474 | 3.522584 |
| PRAME          | 0          | 0        |
| PRAMEF1        | 0          | 0        |

|          |            |          |
|----------|------------|----------|
| PRAMEF10 | 0          | 0        |
| PRAMEF11 | 0          | 0        |
| PRAMEF12 | 0          | 0        |
| PRAMEF13 | 0          | 0        |
| PRAMEF14 | 0          | 0        |
| PRAMEF15 | 0          | 0        |
| PRAMEF16 | 0          | 0        |
| PRAMEF17 | 0          | 0        |
| PRAMEF18 | 0          | 0        |
| PRAMEF19 | 0          | 0        |
| PRAMEF2  | 0          | 0        |
| PRAMEF20 | 0          | 0        |
| PRAMEF21 | 0          | 0        |
| PRAMEF22 | 0          | 0        |
| PRAMEF23 | 0          | 0        |
| PRAMEF25 | 0          | 0        |
| PRAMEF3  | 0          | 0        |
| PRAMEF4  | 0          | 0        |
| PRAMEF5  | 0          | 0        |
| PRAMEF6  | 0          | 0        |
| PRAMEF7  | 0          | 0        |
| PRAMEF8  | 0          | 0        |
| PRAMEF9  | 0          | 0        |
| PRAMEL   | 0          | 0        |
| PRAP1    | 0.02705963 | 0.06148  |
| PRB1     | 0          | 0        |
| PRB2     | 0          | 0        |
| PRB3     | 0          | 0.021893 |
| PRB4     | 0          | 0        |
| PRC1     | 1.78982098 | 2.539663 |
| PRCC     | 22.4019306 | 21.31996 |
| PRCD     | 0.08975595 | 0.025491 |
| PRCP     | 14.8587901 | 12.13745 |
| PRDM1    | 14.6426412 | 9.132014 |
| PRDM10   | 6.00632363 | 5.311839 |
| PRDM11   | 0.47163147 | 0.600075 |
| PRDM12   | 0.01687426 | 0.038339 |
| PRDM13   | 0.01312443 | 0.007455 |
| PRDM14   | 0.00951803 | 0.010813 |
| PRDM15   | 1.44016646 | 1.333195 |
| PRDM16   | 0.00964686 | 0.005479 |
| PRDM2    | 12.1000418 | 12.17061 |
| PRDM4    | 8.71745272 | 7.718307 |
| PRDM5    | 1.81428259 | 1.23278  |
| PRDM6    | 0          | 0.007891 |
| PRDM7    | 0.01880059 | 0.007119 |
| PRDM8    | 0.60784132 | 0.605618 |



|                |            |          |
|----------------|------------|----------|
| PRDM9          | 0          | 0        |
| PRDX1          | 13.3239942 | 12.15547 |
| PRDX2          | 3.14337519 | 2.987916 |
| PRDX2P1        | 0          | 0        |
| PRDX3          | 10.5192731 | 7.656446 |
| PRDX4          | 0.43374733 | 0.259339 |
| PRDX5          | 57.0585622 | 76.19458 |
| PRDX6          | 16.9209849 | 20.10926 |
| PREB           | 26.9881731 | 26.90798 |
| PRELID1        | 108.216019 | 130.3152 |
| PRELID2        | 0.00885277 | 0.030171 |
| PRELP          | 0.0252882  | 0.012312 |
| PREP           | 4.69361548 | 6.178773 |
| PREPL          | 2.56481074 | 1.856407 |
| PREX1          | 170.244004 | 198.0559 |
| PREX2          | 0          | 0        |
| PRF1           | 0.14935121 | 0.188517 |
| PRG1           | 0          | 0        |
| PRG2 (NC_00001 | 1.20214844 | 1.059083 |
| PRG2 (NC_00001 | 0.06244265 | 0.060802 |
| PRG3           | 0.04838971 | 0.082457 |
| PRG-3          | 0.007857   | 0        |
| PRG4           | 0.05002061 | 0.037883 |
| PRH1           | 0.12234191 | 0.119128 |
| PRH2           | 0          | 0.005525 |
| PRHOXNB        | 0          | 0        |
| PRIC285        | 28.9090517 | 34.09329 |
| PRICKLE1       | 0.09202417 | 0.069694 |
| PRICKLE2       | 0.00505295 | 0.00574  |
| PRICKLE3       | 6.95209436 | 7.99371  |
| PRICKLE4       | 1.32845348 | 1.131858 |
| PRIM1          | 1.55317082 | 1.454018 |
| PRIM2          | 1.00950956 | 0.625538 |
| PRIMA1         | 0.01152073 | 0        |
| PRINS          | 0          | 0        |
| PRKAA1         | 12.951276  | 12.14276 |
| PRKAA2         | 0          | 0.002554 |
| PRKAB1         | 49.9844186 | 66.80071 |
| PRKAB2         | 9.871011   | 9.095104 |
| PRKACA         | 10.44713   | 11.52651 |
| PRKACB         | 1.8967405  | 1.311573 |
| PRKACG         | 0.0527281  | 0.02995  |
| PRKAG1         | 22.8126652 | 24.33784 |
| PRKAG2         | 4.11112772 | 4.544406 |
| PRKAG3         | 0          | 0.010389 |
| PRKAR1A        | 153.498658 | 146.7264 |
| PRKAR1AP       | 0          | 0        |

|         |            |          |
|---------|------------|----------|
| PRKAR1B | 0.21776625 | 0.222647 |
| PRKAR2A | 8.0533817  | 9.058485 |
| PRKAR2B | 0.03445834 | 0.032621 |
| PRKCA   | 2.26315991 | 2.056244 |
| PRKCB   | 29.2161325 | 27.72687 |
| PRKCD   | 51.7141562 | 58.53747 |
| PRKCDBP | 0          | 0.046066 |
| PRKCE   | 10.1393897 | 9.995399 |
| PRKCG   | 0.41674249 | 0.473426 |
| PRKCH   | 3.90401895 | 2.902184 |
| PRKCI   | 7.29256975 | 9.609795 |
| PRKCQ   | 0.0657247  | 0.067198 |
| PRKCSH  | 40.116663  | 40.16423 |
| PRKCZ   | 63.9881711 | 65.09527 |
| PRKD1   | 0.00571496 | 0.006492 |
| PRKD2   | 37.0196006 | 40.93981 |
| PRKD3   | 8.6373755  | 14.03245 |
| PRKDC   | 3.33559996 | 3.407359 |
| PRKG1   | 0          | 0.005617 |
| PRKG2   | 0          | 0.014354 |
| PRKRA   | 4.18183378 | 3.606959 |
| PRKRIP1 | 8.8304462  | 9.067799 |
| PRKRIR  | 7.47420856 | 6.955883 |
| PRKX    | 7.21604111 | 5.252906 |
| PRKXP1  | 0          | 0        |
| PRKY    | 0          | 0        |
| PRL     | 0.03105662 | 0        |
| PRLH    | 0          | 0        |
| PRLHR   | 0          | 0        |
| PRLR    | 0.00178362 | 0.002026 |
| PRM1    | 0          | 0        |
| PRM2    | 0          | 0        |
| PRM3    | 0          | 0.076555 |
| PRMT1   | 6.96579592 | 6.928135 |
| PRMT2   | 28.7408765 | 22.76549 |
| PRMT3   | 1.45506684 | 1.381855 |
| PRMT5   | 0.6299087  | 0.609215 |
| PRMT6   | 0.55373976 | 0.419371 |
| PRMT7   | 2.19050519 | 2.128673 |
| PRMT8   | 0.00897368 | 0.010194 |
| PRND    | 0          | 0.012003 |
| PRNP    | 9.38478841 | 11.64439 |
| PRNT    | 0          | 0        |
| PRO0611 | 0          | 0        |
| PRO0628 | 0          | 0        |
| PRO1768 | 0          | 0        |
| PROC    | 1.26990603 | 2.749169 |

|           |            |          |
|-----------|------------|----------|
| PROCA1    | 4.90647258 | 4.443741 |
| PROCR     | 0.02900046 | 0.082362 |
| PRODH     | 0.10460364 | 0.064817 |
| PRODH2    | 0.01253747 | 0        |
| PROK1     | 0.01532459 | 0.017409 |
| PROK2     | 0.69085092 | 0.444236 |
| PROKR1    | 0          | 0.060622 |
| PROKR2    | 0.01820375 | 0        |
| PROL1     | 0          | 0        |
| PROM1     | 0          | 0.006295 |
| PROM2     | 0.02750567 | 0.012499 |
| PROP1     | 0.01436156 | 0.016315 |
| PROS1     | 0.03523798 | 0.033359 |
| ProSAPiP1 | 0.82145852 | 0.874012 |
| PROSC     | 16.1557039 | 14.99676 |
| PROSP     | 0          | 0        |
| PROX1     | 0.36922532 | 0.271863 |
| PROX2     | 0.60274979 | 0.845847 |
| PROZ      | 0.02831694 | 0        |
| PRPF18    | 6.20278092 | 5.057199 |
| PRPF19    | 6.63721469 | 6.448265 |
| PRPF3     | 22.3143383 | 21.26677 |
| PRPF31    | 7.31985869 | 6.346021 |
| PRPF38A   | 25.2880424 | 27.40928 |
| PRPF38B   | 46.9013521 | 46.99682 |
| PRPF39    | 9.78689569 | 8.702908 |
| PRPF4     | 7.07250621 | 6.995237 |
| PRPF40A   | 18.3496844 | 17.08255 |
| PRPF40B   | 1.3449402  | 2.971939 |
| PRPF4B    | 16.7736167 | 15.03593 |
| PRPF6     | 26.3545506 | 25.24843 |
| PRPF8     | 54.1816582 | 51.23757 |
| PRPH      | 0          | 0        |
| PRPH2     | 0.02778372 | 0.063125 |
| PRPS1     | 9.71300076 | 8.663337 |
| PRPS1L1   | 0          | 0.021913 |
| PRPS2     | 4.12490607 | 4.809273 |
| PRPSAP1   | 5.07139183 | 4.809422 |
| PRPSAP2   | 5.84036971 | 4.764384 |
| PRR10     | 0          | 0        |
| PRR11     | 1.10155493 | 0.707304 |
| PRR12     | 10.3445961 | 12.34677 |
| PRR13     | 166.232073 | 154.5237 |
| PRR14     | 36.3426519 | 36.51557 |
| PRR15     | 0.01252999 | 0.014234 |
| PRR16     | 0          | 0        |
| PRR17     | 0.08605183 | 0.032585 |

|         |            |          |
|---------|------------|----------|
| PRR18   | 0.02332692 | 0.017667 |
| PRR19   | 0.01374205 | 0.046834 |
| PRR20   | 0.0113835  | 0        |
| PRR21   | 0          | 0        |
| PRR3    | 3.01207663 | 3.043439 |
| PRR4    | 1.39745402 | 1.491316 |
| PRR5    | 0.01752841 | 0.009956 |
| PRR7    | 6.837506   | 9.563753 |
| PRRC1   | 3.49600472 | 3.284139 |
| PRRG1   | 0          | 0.005211 |
| PRRG2   | 0.06037425 | 0.05144  |
| PRRG3   | 0          | 0        |
| PRRG4   | 0.02118421 | 0.048131 |
| PRRT1   | 0.01108931 | 0.012598 |
| PRRT2   | 0.04095312 | 0.037219 |
| PRRT3   | 0.49195138 | 0.381044 |
| PRRX1   | 0.00516466 | 0        |
| PRRX2   | 0          | 0        |
| PRSS1   | 0          | 0        |
| PRSS12  | 0          | 0        |
| PRSS16  | 0          | 0.008814 |
| PRSS21  | 26.0605819 | 23.49557 |
| PRSS22  | 0.01516979 | 0        |
| PRSS23  | 0.00552426 | 0        |
| PRSS27  | 0.34514907 | 0.277734 |
| PRSS29P | 0          | 0        |
| PRSS3   | 0.0206333  | 0        |
| PRSS33  | 455.656405 | 425.3636 |
| PRSS35  | 0.00866667 | 0        |
| PRSS36  | 1.74840666 | 1.843143 |
| PRSS7   | 0.00533097 | 0        |
| PRSS8   | 0.31429618 | 0.590972 |
| PRSSL1  | 0.01996708 | 0.022683 |
| PRTFDC1 | 0.01091658 | 0        |
| PRTG    | 0.00175606 | 0.001995 |
| PRTN3   | 0          | 0        |
| PRUNE   | 5.79132395 | 4.974393 |
| PRUNE2  | 0.11360528 | 0.074018 |
| PRX     | 0.21002419 | 0.173521 |
| PRY     | 0.0169833  | 0        |
| PRY2    | 0          | 0        |
| PRYP1   | 0          | 0        |
| PRYP2   | 0          | 0        |
| PRYP3   | 0          | 0        |
| PRYP4   | 0          | 0        |
| PS10    | 0          | 0        |
| PS3     | 0          | 0        |

|           |            |          |
|-----------|------------|----------|
| PS5       | 0          | 0        |
| PS8       | 0          | 0        |
| PS9       | 0          | 0        |
| PSAP      | 234.865795 | 226.2125 |
| PSAPL1    | 0          | 0        |
| PSAT1     | 0          | 0        |
| PSCA      | 0          | 0        |
| PSD       | 0.01507913 | 0.03426  |
| PSD2      | 0          | 0.010592 |
| PSD3      | 0.00533277 | 0.002019 |
| PSD4      | 83.4712732 | 98.92957 |
| PSEN1     | 28.068299  | 29.74853 |
| PSEN2     | 5.5994354  | 5.352842 |
| PSENEEN   | 22.5745659 | 18.78483 |
| PSG1      | 0          | 0        |
| PSG10     | 0          | 0        |
| PSG11     | 0          | 0        |
| PSG2      | 0          | 0        |
| PSG3      | 0          | 0        |
| PSG4      | 0          | 0        |
| PSG5      | 0          | 0        |
| PSG6      | 0          | 0        |
| PSG7      | 0          | 0        |
| PSG8      | 0.00986642 | 0        |
| PSG9      | 0          | 0        |
| PSIMCT-1  | 0          | 0        |
| PSIP1     | 24.4122456 | 20.8371  |
| PSIP1P    | 0          | 0        |
| PSIP1P2   | 0          | 0        |
| psiTPTE22 | 0          | 0        |
| PSKH1     | 5.50246381 | 4.617834 |
| PSKH2     | 0.01815659 | 0        |
| PSMA1     | 20.7493543 | 18.76438 |
| PSMA2     | 27.5079023 | 23.6896  |
| PSMA3     | 29.7575342 | 28.93525 |
| PSMA3P    | 0          | 0        |
| PSMA4     | 43.5844771 | 41.8381  |
| PSMA5     | 29.9621759 | 31.68333 |
| PSMA6     | 30.6292395 | 30.64239 |
| PSMA6P1   | 0          | 0        |
| PSMA7     | 66.4092771 | 68.69396 |
| PSMA7P    | 0          | 0        |
| PSMA8     | 0          | 0        |
| psMAGEA   | 0          | 0        |
| PSMB1     | 46.2924135 | 44.95714 |
| PSMB10    | 70.8933785 | 72.14328 |
| PSMB11    | 0          | 0        |

|          |            |          |
|----------|------------|----------|
| PSMB2    | 20.5028079 | 21.115   |
| PSMB3    | 44.9228225 | 44.7925  |
| PSMB3P   | 0          | 0        |
| PSMB3P2  | 0          | 0        |
| PSMB4    | 90.1475271 | 85.05681 |
| PSMB5    | 4.32364096 | 4.106793 |
| PSMB6    | 18.6580721 | 17.55237 |
| PSMB7    | 38.8028466 | 40.65809 |
| PSMB8    | 68.9578678 | 60.09671 |
| PSMB9    | 51.118839  | 45.90135 |
| PSMC1    | 57.40207   | 59.26097 |
| PSMC1P   | 0          | 0        |
| PSMC2    | 24.7154349 | 21.16343 |
| PSMC3    | 10.6457372 | 9.523809 |
| PSMC3IP  | 4.02183214 | 4.79819  |
| PSMC3P   | 0          | 0        |
| PSMC4    | 21.6114029 | 19.62407 |
| PSMC5    | 30.0248097 | 25.74887 |
| PSMC6    | 18.1612401 | 16.913   |
| PSMC6P1  | 0          | 0        |
| PSMC6P2  | 0          | 0        |
| PSMC6P3  | 0          | 0        |
| PSMD1    | 11.6821873 | 11.6946  |
| PSMD10   | 13.9534215 | 12.94678 |
| PSMD10P1 | 0          | 0        |
| PSMD10P2 | 0          | 0        |
| PSMD10P3 | 0          | 0        |
| PSMD11   | 16.4372606 | 16.18024 |
| PSMD12   | 11.1971295 | 11.57703 |
| PSMD12P  | 0          | 0        |
| PSMD13   | 28.9811701 | 27.78816 |
| PSMD14   | 3.54304411 | 3.955318 |
| PSMD15   | 0          | 0        |
| PSMD2    | 40.6907073 | 40.02922 |
| PSMD2P1  | 0          | 0        |
| PSMD3    | 19.8208057 | 19.80228 |
| PSMD4    | 51.8845817 | 46.65845 |
| PSMD5    | 4.87921764 | 4.139521 |
| PSMD6    | 25.7672825 | 22.46077 |
| PSMD7    | 40.8868049 | 40.29714 |
| PSMD7L   | 0          | 0        |
| PSMD8    | 22.3914993 | 20.90529 |
| PSMD9    | 3.83176113 | 3.425265 |
| PSME1    | 66.3106592 | 63.50989 |
| PSME2    | 24.9311222 | 20.60055 |
| PSME2P1  | 0          | 0        |
| PSME2P2  | 0          | 0        |

|          |            |          |
|----------|------------|----------|
| PSME2P3  | 0          | 0        |
| PSME2P4  | 0          | 0        |
| PSME2P5  | 0          | 0        |
| PSME2P6  | 0          | 0        |
| PSME3    | 20.671854  | 20.43471 |
| PSME4    | 20.5692243 | 18.05094 |
| PSMF1    | 18.67763   | 17.77395 |
| PSMG1    | 1.47775903 | 1.615007 |
| PSMG2    | 18.2340024 | 18.31876 |
| PSMG3    | 6.26444751 | 5.967051 |
| PSMG4    | 0.94835946 | 0.733516 |
| PSORS1C1 | 0          | 0        |
| PSORS1C2 | 0          | 0        |
| PSORS1C3 | 0          | 0        |
| PSPC1    | 14.8276414 | 14.40506 |
| PSPH     | 0.4566408  | 0.327039 |
| PSPHL    | 0          | 0        |
| PSPN     | 0.04463977 | 0.152134 |
| PSRC1    | 1.35834551 | 2.097036 |
| PSTK     | 0.69056806 | 0.476301 |
| PSTPIP1  | 56.4566973 | 61.48323 |
| PSTPIP2  | 54.3084855 | 35.60651 |
| PTAFR    | 106.85761  | 81.43485 |
| PTAR1    | 10.5827429 | 9.524576 |
| PTBP1    | 46.7991442 | 44.28318 |
| PTBP1P   | 0          | 0        |
| PTBP2    | 4.57780442 | 4.179552 |
| PTCD1    | 1.07892247 | 1.101554 |
| PTCD2    | 0.17996004 | 0.124934 |
| PTCD3    | 4.5023058  | 3.788134 |
| PTCH1    | 0.00700922 | 0.002654 |
| PTCH2    | 0.02320677 | 0.006591 |
| PTCHD1   | 0.00397379 | 0.004514 |
| PTCHD2   | 0.01209743 | 0.009162 |
| PTCHD3   | 0.00831698 | 0        |
| PTCRA    | 0.01941397 | 0.022055 |
| PTDSS1   | 31.1853351 | 29.13144 |
| PTDSS2   | 1.66826757 | 1.592341 |
| PTEN     | 19.5771383 | 15.14245 |
| PTENP1   | 0          | 0        |
| PTER     | 1.41725501 | 1.147374 |
| PTF1A    | 0          | 0        |
| PTGDR    | 0.03573306 | 0.016237 |
| PTGDS    | 0          | 0.05883  |
| PTGER1   | 0          | 0.016809 |
| PTGER2   | 3.71334474 | 2.802648 |
| PTGER3   | 0.01022633 | 0.00697  |

|         |            |          |
|---------|------------|----------|
| PTGER4  | 43.7125001 | 19.4521  |
| PTGES   | 1.01185141 | 1.48363  |
| PTGES2  | 6.30849666 | 8.981127 |
| PTGES3  | 46.8131847 | 54.73879 |
| PTGFR   | 0          | 0.004398 |
| PTGFRN  | 0.01706602 | 0.058162 |
| PTGIR   | 0.02015851 | 0.0229   |
| PTGIS   | 0.00750503 | 0.008526 |
| PTGR1   | 0          | 0.038462 |
| PTGR2   | 0.1988211  | 0.122343 |
| PTGS1   | 31.4657515 | 33.124   |
| PTGS2   | 0.35096813 | 0.132902 |
| PTH     | 0          | 0        |
| PTH1R   | 0          | 0.011224 |
| PTH2    | 0          | 0        |
| PTH2R   | 0.05424892 | 0.008804 |
| PTHLH   | 0          | 0        |
| PTK2    | 0.07424526 | 0.052715 |
| PTK2B   | 91.2353933 | 95.98872 |
| PTK6    | 0.11685376 | 0.113784 |
| PTK7    | 0.0197932  | 0.022485 |
| PTMA    | 559.816842 | 744.7883 |
| PTMAP1  | 0          | 0        |
| PTMAP2  | 0          | 0        |
| PTMAP3  | 0          | 0        |
| PTMAP4  | 0          | 0        |
| PTMAP5  | 0          | 0        |
| PTMAP6  | 0          | 0        |
| PTMAP7  | 0          | 0        |
| PTMS    | 26.1079762 | 28.26751 |
| PTN     | 0.01357349 | 0        |
| PTOV1   | 27.4757775 | 23.74565 |
| PTP4A1  | 7.59179109 | 8.450497 |
| PTP4A2  | 167.277065 | 164.3402 |
| PTP4A3  | 4.02511967 | 5.307802 |
| PTP4AP1 | 0          | 0        |
| PTP4AP2 | 0          | 0        |
| PTPDC1  | 0.26172611 | 0.391478 |
| PTPLA   | 0.09652026 | 0.091374 |
| PTPLAD1 | 1.00276672 | 1.116822 |
| PTPLAD2 | 7.81025712 | 5.667653 |
| PTPLB   | 3.84372099 | 3.561638 |
| PTPMT1  | 4.32784185 | 3.626352 |
| PTPN1   | 29.1743893 | 20.99125 |
| PTPN11  | 15.3297853 | 13.33962 |
| PTPN12  | 81.0148027 | 90.03462 |
| PTPN13  | 0.00245108 | 0        |



|         |            |          |
|---------|------------|----------|
| PTPN14  | 0.00514192 | 0.005841 |
| PTPN18  | 31.9706518 | 39.52859 |
| PTPN2   | 7.4359686  | 6.906132 |
| PTPN20A | 0          | 0.007727 |
| PTPN20B | 0.00680211 | 0.007727 |
| PTPN20C | 0          | 0        |
| PTPN21  | 0          | 0.007686 |
| PTPN22  | 56.2239877 | 36.55526 |
| PTPN23  | 7.90197694 | 6.902765 |
| PTPN3   | 0.00437845 | 0.002487 |
| PTPN4   | 1.58369853 | 1.478054 |
| PTPN5   | 0          | 0        |
| PTPN6   | 308.821907 | 317.7599 |
| PTPN7   | 87.1588675 | 114.8586 |
| PTPN9   | 6.17732553 | 6.186595 |
| PTPNS1L | 0          | 0        |
| PTPRA   | 17.6083841 | 16.36806 |
| PTPRB   | 0          | 0        |
| PTPRC   | 222.449571 | 170.7303 |
| PTPRCAP | 43.1169962 | 67.09951 |
| PTPRD   | 0.00625134 | 0.004734 |
| PTPRE   | 80.6509936 | 41.09345 |
| PTPRF   | 0.00271891 | 0.006177 |
| PTPRG   | 0          | 0.003593 |
| PTPRH   | 0.01619409 | 0.006132 |
| PTPRJ   | 12.1763485 | 6.802838 |
| PTPRK   | 0.00683084 | 0.00388  |
| PTPRM   | 0.00375452 | 0.017061 |
| PTPRN   | 0.00578891 | 0.013153 |
| PTPRN2  | 0.69256839 | 0.618529 |
| PTPRO   | 0.00656836 | 0.011193 |
| PTPRQ   | 0.00828312 | 0.00941  |
| PTPRR   | 0.0055711  | 0        |
| PTPRS   | 2.15776501 | 2.513024 |
| PTPRT   | 0.00165632 | 0.003763 |
| PTPRU   | 0.09366238 | 0.297925 |
| PTPRV   | 0          | 0        |
| PTPRZ1  | 0.0051539  | 0.002927 |
| PTRF    | 0          | 0        |
| PTRH1   | 0.72234266 | 0.527524 |
| PTRH2   | 1.18563896 | 1.167317 |
| PTS     | 2.47356835 | 2.24801  |
| PTS-P1  | 0          | 0        |
| PTTG1   | 1.09260849 | 0.469651 |
| PTTG1IP | 36.6406352 | 44.81077 |
| PTTG2   | 0          | 0        |
| PTTG3   | 0          | 0        |

|        |            |          |
|--------|------------|----------|
| PTTG4P | 0          | 0        |
| PTX3   | 0.14103679 | 0.147895 |
| PUF60  | 19.8705719 | 19.03383 |
| PUM1   | 15.5903708 | 14.36655 |
| PUM2   | 34.0547743 | 34.41082 |
| PURA   | 7.94683511 | 9.402363 |
| PURB   | 10.6877027 | 11.4619  |
| PURG   | 0.00557997 | 0.025356 |
| PUS1   | 1.25986757 | 1.26699  |
| PUS10  | 1.92042393 | 1.404269 |
| PUS3   | 0.82094568 | 0.984419 |
| PUS7   | 0.40433329 | 0.349639 |
| PUS7L  | 2.40890357 | 1.873235 |
| PUSL1  | 4.44244896 | 5.258576 |
| PVALB  | 0          | 0        |
| PVR    | 0.02413534 | 0.007834 |
| PVRIG  | 0.0402014  | 0        |
| PVRL1  | 1.21392572 | 1.234494 |
| PVRL2  | 4.88140551 | 5.598803 |
| PVRL3  | 0.06371312 | 0.072379 |
| PVRL4  | 0.02401523 | 0.00682  |
| PVT1   | 0          | 0        |
| PWP1   | 4.08479177 | 4.12479  |
| PWP2   | 2.57979521 | 2.469105 |
| PWRN1  | 0          | 0        |
| PWRN2  | 0          | 0        |
| PWWP2A | 3.70628345 | 3.403887 |
| PWWP2B | 5.59175787 | 8.141199 |
| PXDN   | 0.00616488 | 0.007003 |
| PXDNL  | 0.06560848 | 0.08447  |
| PXK    | 55.7529126 | 61.81612 |
| PXMP2  | 0.7689515  | 0.823624 |
| PXMP3  | 12.7381144 | 13.00345 |
| PXMP4  | 2.77325732 | 1.815168 |
| PXN    | 44.1085045 | 46.61906 |
| PXT1   | 0.01496465 | 0.017    |
| PYCARD | 27.7842831 | 32.87745 |
| PYCR1  | 0.04080608 | 0.011589 |
| PYCR2  | 19.3363499 | 20.00537 |
| PYCRL  | 0.03955104 | 0.008986 |
| PYDC1  | 0          | 0        |
| PYDC2  | 0          | 0        |
| PYGB   | 9.5583567  | 8.881028 |
| PYGL   | 184.562287 | 102.7904 |
| PYGM   | 1.35478488 | 1.809878 |
| PYGO1  | 0.01668677 | 0        |
| PYGO2  | 16.9987817 | 16.47171 |

|           |            |          |
|-----------|------------|----------|
| PYHIN1    | 0.01009377 | 0.0688   |
| PYROXD1   | 2.29311656 | 2.21137  |
| PYROXD2   | 6.56911871 | 5.918226 |
| PYY       | 0          | 0.045366 |
| PYY2      | 0          | 0        |
| PYY3      | 0          | 0        |
| PZP       | 0.00912162 | 0        |
| QARS      | 33.0781236 | 32.43657 |
| QDPR      | 0.12719498 | 0.043349 |
| QKI       | 16.8039484 | 16.44068 |
| QPCT      | 2.79020834 | 5.231442 |
| QPCTL     | 10.8212564 | 8.818638 |
| QPRT      | 2.21746256 | 3.025959 |
| QRF       | 0          | 0        |
| QRFPR     | 0.00895839 | 0.010177 |
| QRICH1    | 33.8498315 | 30.86691 |
| QRICH2    | 0.10593095 | 0.102511 |
| QRSL1     | 0.76075141 | 0.539416 |
| QSER1     | 1.08630499 | 1.455624 |
| QSOX1     | 44.0542821 | 58.92765 |
| QSOX2     | 12.5084474 | 10.84584 |
| QTRT1     | 0.36250571 | 0.340193 |
| QTRTD1    | 1.90469715 | 1.428564 |
| R3HCC1    | 10.6189883 | 9.587259 |
| R3HDM1    | 1.72383282 | 1.449451 |
| R3HDM2    | 8.31172495 | 8.180079 |
| R3HDML    | 0          | 0        |
| RAB10     | 12.6934044 | 11.83663 |
| RAB11A    | 24.5310172 | 20.751   |
| RAB11B    | 60.494614  | 61.69953 |
| RAB11FIP1 | 27.745067  | 18.92635 |
| RAB11FIP2 | 5.69255372 | 4.977214 |
| RAB11FIP3 | 1.01628736 | 1.11156  |
| RAB11FIP4 | 72.9365684 | 80.66105 |
| RAB11FIP5 | 0.11621556 | 0.198034 |
| RAB12     | 8.358995   | 7.473872 |
| RAB13     | 0.0728781  | 0        |
| RAB14     | 20.5048781 | 20.36503 |
| RAB15     | 0.56423035 | 0.387402 |
| RAB17     | 0          | 0.024298 |
| RAB18     | 13.6626971 | 12.0196  |
| RAB19     | 0.10578783 | 0.210309 |
| RAB1A     | 29.1952193 | 28.14159 |
| RAB1B     | 73.8306379 | 72.18068 |
| RAB1C     | 0          | 0        |
| RAB20     | 1.40726205 | 1.440388 |
| RAB21     | 19.4086135 | 19.22992 |

|          |            |          |
|----------|------------|----------|
| RAB22A   | 3.61156419 | 3.647235 |
| RAB23    | 0.18671401 | 0.333316 |
| RAB24    | 70.8365834 | 76.60423 |
| RAB25    | 0.21316004 | 0.154097 |
| RAB26    | 0          | 0        |
| RAB27A   | 36.3947652 | 31.24942 |
| RAB27B   | 0.1105765  | 0.053836 |
| RAB28    | 6.34499374 | 6.098034 |
| RAB2A    | 40.7136853 | 46.10575 |
| RAB2B    | 12.9000402 | 11.37732 |
| RAB30    | 0.23623967 | 0.089457 |
| RAB31    | 30.0587481 | 32.03619 |
| RAB32    | 7.67258545 | 7.485192 |
| RAB33A   | 17.4388801 | 22.05277 |
| RAB33B   | 3.71706549 | 3.339841 |
| RAB34    | 1.22903814 | 1.146884 |
| RAB35    | 32.5504347 | 36.17807 |
| RAB36    | 0.02200453 | 0.037496 |
| RAB37    | 130.59889  | 112.2345 |
| RAB38    | 0.29865527 | 0.152675 |
| RAB39    | 0.01179873 | 0.013404 |
| RAB39B   | 0.70627727 | 0.480034 |
| RAB3A    | 1.27468695 | 1.113896 |
| RAB3B    | 0          | 0        |
| RAB3C    | 0.4584314  | 0.213049 |
| RAB3D    | 36.0753949 | 46.82956 |
| RAB3GAP1 | 19.1486982 | 17.92383 |
| RAB3GAP2 | 7.29532223 | 6.472346 |
| RAB3IL1  | 0.03682195 | 0.020915 |
| RAB3IP   | 0.40477695 | 0.314497 |
| RAB40A   | 0.0156206  | 0        |
| RAB40AL  | 0.02043278 | 0        |
| RAB40B   | 0.09562402 | 0.081473 |
| RAB40C   | 26.7887831 | 33.26724 |
| RAB41    | 0.06135797 | 0.092938 |
| RAB42    | 0.1154181  | 0.174822 |
| RAB42P   | 0          | 0        |
| RAB43    | 11.0256514 | 12.85295 |
| RAB43P   | 0          | 0        |
| RAB4A    | 28.1782786 | 25.66062 |
| RAB4B    | 23.5520593 | 19.52712 |
| RAB5A    | 23.2398333 | 24.42217 |
| RAB5B    | 45.355007  | 40.03799 |
| RAB5C    | 93.2376133 | 98.4789  |
| RAB6A    | 25.9914734 | 24.65318 |
| RAB6B    | 0          | 0.012885 |
| RAB6C    | 0.02049919 | 0        |

|          |            |          |
|----------|------------|----------|
| RAB7A    | 80.8137609 | 81.58605 |
| RAB7L1   | 27.0428842 | 32.66942 |
| RAB8A    | 42.0796357 | 41.16533 |
| RAB8B    | 15.5760756 | 13.74239 |
| RAB9A    | 9.49154626 | 13.01418 |
| RAB9AP1  | 0          | 0        |
| RAB9AP2  | 0          | 0        |
| RAB9AP3  | 0          | 0        |
| RAB9AP5  | 0          | 0        |
| RAB9B    | 0.08017285 | 0.068308 |
| RAB9P1   | 0          | 0        |
| RABAC1   | 32.1242046 | 30.8109  |
| RABEP1   | 13.9533157 | 13.4503  |
| RABEP2   | 4.80447256 | 4.724642 |
| RABEPK   | 2.36223188 | 1.516779 |
| RABGAP1  | 4.81996985 | 4.405295 |
| RABGAP1L | 3.66514077 | 3.550294 |
| RABGEF1  | 13.1284153 | 12.91426 |
| RABGGTA  | 7.60925588 | 5.361748 |
| RABGGTB  | 31.7207032 | 34.83777 |
| RABIF    | 7.73524522 | 6.762533 |
| RABL2A   | 1.8409276  | 1.794135 |
| RABL2B   | 0.56260442 | 0.712171 |
| RABL3    | 1.14791918 | 0.953436 |
| RABL4    | 2.01810229 | 1.637569 |
| RABL5    | 0.01710072 | 0.038853 |
| RAC1     | 36.7022666 | 53.68671 |
| RAC1P1   | 0          | 0        |
| RAC1P2   | 0          | 0        |
| RAC1P3   | 0          | 0        |
| RAC1P4   | 0          | 0        |
| RAC1P5   | 0          | 0        |
| RAC2     | 348.851489 | 347.5706 |
| RAC3     | 0.51571567 | 0.856259 |
| RACGAP1  | 1.75666974 | 1.795354 |
| RACGAP1P | 0          | 0        |
| RAD1     | 5.84560771 | 5.401309 |
| RAD17    | 5.35383638 | 4.719289 |
| RAD17P1  | 0          | 0        |
| RAD17P2  | 0          | 0        |
| RAD18    | 4.2589065  | 3.614916 |
| RAD21    | 68.4472641 | 69.57255 |
| RAD21L1  | 0          | 0        |
| RAD23A   | 19.9699602 | 20.5681  |
| RAD23B   | 13.7555555 | 13.71803 |
| RAD50    | 1.15354516 | 0.993008 |
| RAD51    | 0.23145455 | 0.178797 |

|          |            |          |
|----------|------------|----------|
| RAD51AP1 | 0.34285467 | 0.200008 |
| RAD51AP2 | 0          | 0        |
| RAD51C   | 1.63546723 | 1.372515 |
| RAD51L1  | 0.26020049 | 0.212055 |
| RAD51L3  | 1.40006075 | 1.442539 |
| RAD52    | 0.74725269 | 0.562949 |
| RAD54B   | 0.02765581 | 0.023563 |
| RAD54L   | 0.04678236 | 0.106291 |
| RAD54L2  | 4.57691254 | 4.229286 |
| RAD9A    | 7.35193005 | 6.787333 |
| RAD9B    | 0.29000456 | 0.177396 |
| RADIL    | 0.00572897 | 0        |
| RAE1     | 9.84411809 | 9.708141 |
| RAET1E   | 0          | 0        |
| RAET1F   | 0          | 0        |
| RAET1G   | 0          | 0        |
| RAET1J   | 0          | 0        |
| RAET1K   | 0          | 0        |
| RAET1L   | 0          | 0        |
| RAET1M   | 0          | 0        |
| RAF1     | 60.3603547 | 53.72144 |
| RAF1P1   | 0          | 0        |
| RAG1     | 0.0702761  | 0.072577 |
| RAG1AP1  | 10.8022922 | 10.65315 |
| RAG2     | 0          | 0        |
| RAGE     | 0.13045707 | 0.086451 |
| RAI1     | 32.5066654 | 43.89224 |
| RAI14    | 0.00718078 | 0        |
| RAI2     | 0.00944534 | 0        |
| RALA     | 8.96358888 | 9.226008 |
| RALB     | 107.09807  | 97.04052 |
| RALBP1   | 18.9778481 | 17.07176 |
| RALGDS   | 42.9522907 | 60.01203 |
| RALGPS1  | 2.57175371 | 2.849928 |
| RALGPS2  | 8.64582944 | 8.671351 |
| RALY     | 83.3537565 | 83.33249 |
| RALYL    | 0          | 0        |
| RAMP1    | 0.04620952 | 0.026247 |
| RAMP2    | 0          | 0        |
| RAMP3    | 0          | 0        |
| RAN      | 29.0938753 | 27.85481 |
| RANBP1   | 10.1083322 | 9.267639 |
| RANBP10  | 6.60286548 | 6.177261 |
| RANBP17  | 0.00473543 | 0.00538  |
| RANBP2   | 24.5083078 | 24.14617 |
| RANBP20P | 0          | 0        |
| RANBP3   | 17.53965   | 16.29551 |

|          |            |          |
|----------|------------|----------|
| RANBP3L  | 0          | 0        |
| RANBP6   | 11.3445373 | 10.67041 |
| RANBP9   | 19.397607  | 23.44777 |
| RANGAP1  | 10.8989303 | 10.38896 |
| RANGRF   | 11.8299151 | 10.35981 |
| RANP1    | 0          | 0        |
| RAP1A    | 69.8314241 | 77.17391 |
| RAP1AP   | 0          | 0        |
| RAP1B    | 49.7443165 | 51.18238 |
| RAP1BL   | 0.04339594 | 0.036974 |
| RAP1GAP  | 0.09939673 | 0.059779 |
| RAP1GDS1 | 2.04048014 | 1.822661 |
| RAP2A    | 2.22411142 | 2.230665 |
| RAP2B    | 6.23309876 | 6.594542 |
| RAP2C    | 31.7598503 | 34.34282 |
| RAPGEF1  | 134.751439 | 153.2653 |
| RAPGEF2  | 11.7718427 | 14.94176 |
| RAPGEF3  | 0.07643259 | 0.112154 |
| RAPGEF4  | 0.01330998 | 0.02016  |
| RAPGEF5  | 0          | 0.003607 |
| RAPGEF6  | 5.59465243 | 5.313218 |
| RAPGEFL1 | 2.76426407 | 2.640372 |
| RAPH1    | 0.00608372 | 0.002304 |
| RAPSN    | 0.64440618 | 0.401913 |
| RARA     | 48.6263429 | 60.22222 |
| RARB     | 0.06041762 | 0.068635 |
| RARG     | 1.34602    | 1.897217 |
| RARRES1  | 0.03786074 | 0.014337 |
| RARRES2  | 0          | 0.032234 |
| RARRES3  | 2.99576611 | 2.966125 |
| RARS     | 9.52034846 | 8.761594 |
| RARS2    | 12.4866594 | 11.96863 |
| RASA1    | 5.69998651 | 5.176933 |
| RASA2    | 5.73491859 | 5.077429 |
| RASA3    | 35.1373329 | 35.46939 |
| RASA4    | 0.04875656 | 0.06817  |
| RASA4P   | 0          | 0        |
| RASAL1   | 0.18171701 | 0.183496 |
| RASAL2   | 0.62053928 | 0.806307 |
| RASAL3   | 162.214582 | 214.1747 |
| RASD1    | 0.06021    | 0.0684   |
| RASD2    | 0.04243255 | 0.20085  |
| RASEF    | 0.00761511 | 0        |
| RASGEF1A | 1.60762404 | 1.184822 |
| RASGEF1B | 0.25945759 | 0.252641 |
| RASGEF1C | 0          | 0.010778 |
| RASGRF1  | 0.01432634 | 0.01302  |

|         |            |          |
|---------|------------|----------|
| RASGRF2 | 0.02577897 | 0.005857 |
| RASGRP1 | 4.8410563  | 3.997488 |
| RASGRP2 | 57.5957265 | 67.04852 |
| RASGRP3 | 0.57586862 | 0.463969 |
| RASGRP4 | 39.4894656 | 34.03888 |
| RASIP1  | 0.10187925 | 0.115736 |
| RASL10A | 0.03529714 | 0.080196 |
| RASL10B | 0.00658276 | 0.022434 |
| RASL11A | 0.38153549 | 0.247674 |
| RASL11B | 0.01074365 | 0.012205 |
| RASL12  | 0.00815568 | 0.009265 |
| RASSF1  | 69.0230042 | 66.97817 |
| RASSF10 | 0.03413203 | 0.02585  |
| RASSF2  | 378.274605 | 351.9952 |
| RASSF3  | 20.9938795 | 14.41682 |
| RASSF4  | 0.27809055 | 0.229757 |
| RASSF5  | 283.416395 | 275.3406 |
| RASSF6  | 0.01888644 | 0.005364 |
| RASSF7  | 15.5805241 | 26.25051 |
| RASSF8  | 0.00955697 | 0.010857 |
| RASSF9  | 0          | 0        |
| RAVER1  | 22.8978904 | 25.67333 |
| RAVER2  | 0.73747722 | 0.892543 |
| RAX     | 0.00657658 | 0.007471 |
| RAX2    | 0.01951307 | 0        |
| RB1     | 6.01856708 | 6.40173  |
| RB1CC1  | 18.0167565 | 17.31106 |
| RBAK    | 6.27775109 | 5.804472 |
| RBBP4   | 10.5860889 | 9.979436 |
| RBBP5   | 8.45466064 | 8.138966 |
| RBBP6   | 11.6614244 | 11.55912 |
| RBBP7   | 22.3049528 | 22.50235 |
| RBBP8   | 4.1754947  | 3.856555 |
| RBBP9   | 1.00198417 | 0.79184  |
| RBCK1   | 23.0882798 | 25.19092 |
| RBKS    | 0.8614057  | 0.559183 |
| RBL1    | 0.79358912 | 0.765757 |
| RBL2    | 34.7610773 | 30.0397  |
| RBM10   | 17.4051987 | 16.96506 |
| RBM11   | 0.20309166 | 0.145715 |
| RBM12   | 0          | 0        |
| RBM12B  | 3.80630992 | 3.734388 |
| RBM14   | 7.01232645 | 6.938371 |
| RBM15   | 9.14917491 | 7.274829 |
| RBM15B  | 8.12190497 | 7.191915 |
| RBM16   | 15.23118   | 13.63227 |
| RBM17   | 24.8736937 | 30.32522 |



|          |            |          |
|----------|------------|----------|
| RBM18    | 5.35912934 | 4.951411 |
| RBM19    | 1.40880907 | 1.265321 |
| RBM20    | 0.0377892  | 0.023116 |
| RBM22    | 36.8240777 | 36.05123 |
| RBM23    | 36.8589231 | 32.76406 |
| RBM24    | 0          | 0.008759 |
| RBM25    | 47.7724055 | 44.28431 |
| RBM26    | 15.4847153 | 13.26731 |
| RBM27    | 7.88048174 | 7.404311 |
| RBM28    | 3.07633002 | 2.499901 |
| RBM3     | 94.5477887 | 84.18448 |
| RBM33    | 30.250004  | 28.82175 |
| RBM34    | 17.6060903 | 15.94612 |
| RBM38    | 27.0893118 | 35.61709 |
| RBM39    | 145.4408   | 135.2157 |
| RBM4     | 31.2182682 | 30.97509 |
| RBM41    | 4.46566897 | 3.750911 |
| RBM42    | 27.6387532 | 27.85149 |
| RBM43    | 1.91774225 | 1.659875 |
| RBM44    | 0.37308549 | 0.501905 |
| RBM45    | 0.90697506 | 1.016957 |
| RBM46    | 0          | 0        |
| RBM47    | 0.03605716 | 0.040962 |
| RBM4B    | 18.0722665 | 15.3458  |
| RBM5     | 104.25173  | 92.76668 |
| RBM6     | 38.9557982 | 33.75314 |
| RBM7     | 11.5710611 | 12.6216  |
| RBM8A    | 31.798267  | 30.86124 |
| RBM8B    | 0          | 0        |
| RBM9     | 0.00286879 | 0.003259 |
| RBMS1    | 23.7528354 | 24.01328 |
| RBMS1P   | 0          | 0        |
| RBMS2    | 0.03468709 | 0.073181 |
| RBMS2P   | 0          | 0        |
| RBMS3    | 0          | 0.01636  |
| RBMX     | 27.2170266 | 26.79567 |
| RBMX2    | 6.97633691 | 5.79933  |
| RBMXL2   | 0.0189845  | 0.03235  |
| RBMXL3   | 0          | 0        |
| RBMXP1   | 0          | 0        |
| RBMXP2   | 0          | 0        |
| RBMXP3   | 0          | 0        |
| RBMXP4   | 0          | 0        |
| RBMX1A1  | 0          | 0        |
| RBMX1A3P | 0          | 0        |
| RBMX1B   | 0          | 0        |
| RBMX1D   | 0          | 0        |

|        |            |          |
|--------|------------|----------|
| RBM1E  | 0          | 0        |
| RBM1F  | 0          | 0        |
| RBM1H  | 0          | 0        |
| RBM1J  | 0          | 0        |
| RBM2AP | 0          | 0        |
| RBM2BP | 0          | 0        |
| RBM2CP | 0          | 0        |
| RBM2DP | 0          | 0        |
| RBM2EP | 0          | 0        |
| RBM2FP | 0          | 0        |
| RBM2GP | 0          | 0        |
| RBM2HP | 0          | 0        |
| RBM2JP | 0          | 0        |
| RBM2KP | 0          | 0        |
| RBM2MP | 0          | 0        |
| RBM2NP | 0          | 0        |
| RBM2OP | 0          | 0        |
| RBM2QP | 0          | 0        |
| RBM2SP | 0          | 0        |
| RBM2TP | 0          | 0        |
| RBM2UP | 0          | 0        |
| RBM2VP | 0          | 0        |
| RBM2WP | 0          | 0        |
| RBM2XP | 0          | 0        |
| RBM2YP | 0          | 0        |
| RBM3AP | 0          | 0        |
| RBP1   | 0          | 0        |
| RBP2   | 0          | 0.034717 |
| RBP3   | 0.00983411 | 0        |
| RBP4   | 0          | 0.025711 |
| RBP5   | 2.86302379 | 2.744247 |
| RBP7   | 0.03209974 | 0        |
| RBPJ   | 37.4979328 | 34.79327 |
| RBPJL  | 0          | 0        |
| RBPJP1 | 0          | 0        |
| RBPMS  | 0.40666778 | 0.2896   |
| RBPMS2 | 0.01053373 | 0.023933 |
| RBX1   | 93.2217169 | 92.97313 |
| RC3H1  | 9.54132425 | 8.784229 |
| RC3H2  | 7.69292719 | 7.146188 |
| RCAN1  | 1.42053253 | 1.366745 |
| RCAN2  | 0          | 0        |
| RCAN3  | 1.4223018  | 2.037259 |
| RCBTB1 | 3.07064715 | 2.422269 |
| RCBTB2 | 2.41708529 | 2.760893 |
| RCC1   | 0.04982306 | 0.075466 |
| RCC2   | 76.0749508 | 99.78437 |

|        |            |          |
|--------|------------|----------|
| RCC2P1 | 0          | 0        |
| RCC2P2 | 0          | 0        |
| RCCD1  | 0.07598602 | 0.051793 |
| RCE1   | 6.37477744 | 6.007811 |
| RCHY1  | 3.83119599 | 3.2186   |
| RCL1   | 0.70762986 | 1.024119 |
| RCN1   | 0.1337064  | 0.037973 |
| RCN2   | 4.0283508  | 3.626478 |
| RCN3   | 4.98983043 | 5.333568 |
| RCOR1  | 25.1435377 | 23.63842 |
| RCOR2  | 0.05671573 | 0.055226 |
| RCOR3  | 21.3583972 | 21.9789  |
| RCSD1  | 64.1233932 | 50.29369 |
| RCTPI1 | 0          | 0        |
| RCVRN  | 0.19683289 | 0.060983 |
| RD3    | 2.61707706 | 5.610145 |
| RDBP   | 18.8702682 | 16.87718 |
| RDH10  | 0.56567727 | 0.608796 |
| RDH11  | 17.1362997 | 10.26836 |
| RDH12  | 0.03358679 | 0.012718 |
| RDH13  | 1.86915298 | 1.87146  |
| RDH14  | 4.32333368 | 3.776833 |
| RDH16  | 0.14634801 | 0.24938  |
| RDH5   | 2.2802341  | 2.09017  |
| RDH8   | 0.02453364 | 0        |
| RDM1   | 0.03324163 | 0.037763 |
| RDX    | 8.1853627  | 13.3363  |
| RDXP2  | 0          | 0        |
| REC8   | 25.9772429 | 27.0411  |
| RECK   | 0.16679206 | 0.135342 |
| RECQL  | 9.1912799  | 7.780516 |
| RECQL4 | 0.23226299 | 0.320395 |
| RECQL5 | 2.65222181 | 2.416733 |
| REEP1  | 0.01090243 | 0.006193 |
| REEP2  | 0.01001683 | 0.045517 |
| REEP3  | 3.77612744 | 3.727493 |
| REEP4  | 55.2566549 | 72.69872 |
| REEP5  | 17.5031157 | 22.74298 |
| REEP6  | 0          | 0.086981 |
| REG1A  | 0.02602145 | 0        |
| REG1B  | 0          | 0.029634 |
| REG1P  | 0          | 0        |
| REG3A  | 0          | 0        |
| REG3G  | 0          | 0        |
| REG4   | 0          | 0.018719 |
| REL    | 11.2994931 | 8.698898 |
| RELA   | 38.2990513 | 45.72266 |

|          |            |          |
|----------|------------|----------|
| RELB     | 12.9208532 | 14.2995  |
| RELL1    | 5.81895309 | 4.840936 |
| RELL2    | 1.22098321 | 1.257598 |
| RELN     | 0          | 0.002064 |
| RELT     | 57.66816   | 73.78617 |
| REM1     | 0          | 0        |
| REM2     | 10.7332109 | 12.5657  |
| REN      | 0          | 0        |
| RENBP    | 64.0908117 | 62.05907 |
| REP15    | 0          | 0        |
| REPIN1   | 27.1992867 | 26.78611 |
| REPS1    | 6.11635226 | 4.708414 |
| REPS2    | 3.57163613 | 3.105395 |
| RER1     | 24.8524442 | 23.48355 |
| RERE     | 6.83241136 | 6.889107 |
| RERG     | 0          | 0        |
| RERGL    | 0          | 0        |
| RESP18   | 0          | 0        |
| REST     | 7.74315355 | 11.39156 |
| RET      | 0.00657144 | 0.022396 |
| RETN     | 0.04398605 | 0.199875 |
| RETNLB   | 0.03669342 | 0        |
| RETSAT   | 8.49649436 | 8.577286 |
| REV1     | 9.97970399 | 12.26546 |
| REV3L    | 3.70757869 | 3.361459 |
| REXO1    | 14.4666761 | 12.98795 |
| REXO1L1  | 0          | 0        |
| REXO1L2P | 0          | 0        |
| REXO1L3P | 0          | 0        |
| REXO1L4P | 0          | 0        |
| REXO1L5P | 0          | 0        |
| REXO1L6P | 0          | 0        |
| REXO1L7P | 0          | 0        |
| REXO1L8  | 0          | 0        |
| REXO2    | 4.50930871 | 3.517962 |
| REXO4    | 2.41434945 | 2.00392  |
| RFC1     | 4.49527862 | 4.035473 |
| RFC2     | 10.5747237 | 13.21154 |
| RFC3     | 3.83079329 | 3.543166 |
| RFC4     | 2.96952972 | 2.831274 |
| RFC5     | 2.59834925 | 1.95494  |
| RFESD    | 0.24422243 | 0.176553 |
| RFFL     | 43.5006847 | 62.8125  |
| RFK      | 2.41554412 | 2.558804 |
| RFNG     | 8.36182473 | 8.780522 |
| RFPL1    | 0.0421631  | 0.031932 |
| RFPL1S   | 0          | 0        |

|         |            |          |
|---------|------------|----------|
| RFPL2   | 0.02816521 | 0        |
| RFPL3   | 0.11206039 | 0.015913 |
| RFPL3S  | 0          | 0        |
| RFPL4A  | 0          | 0        |
| RFPL4B  | 0          | 0        |
| RFT1    | 1.02240825 | 0.936671 |
| RFTN1   | 3.20072493 | 4.272586 |
| RFTN1P1 | 0          | 0        |
| RFTN2   | 0.01350808 | 0.023018 |
| RFWD2   | 24.3072229 | 23.04991 |
| RFWD3   | 8.53411051 | 8.132127 |
| RFX1    | 17.9370837 | 27.47063 |
| RFX2    | 4.72967683 | 9.363521 |
| RFX3    | 2.28120055 | 1.920957 |
| RFX4    | 0          | 0        |
| RFX5    | 13.0754546 | 10.70803 |
| RFX6    | 0          | 0        |
| RFX7    | 5.82105063 | 5.679975 |
| RFXANK  | 9.57690666 | 8.271756 |
| RFXAP   | 1.92763211 | 1.910809 |
| RG9MTD1 | 2.92163408 | 3.274571 |
| RG9MTD2 | 0.33356182 | 0.285752 |
| RG9MTD3 | 4.53883071 | 4.010365 |
| RGAG1   | 0.00387564 | 0.026417 |
| RGAG4   | 1.97126198 | 1.97006  |
| RGL1    | 0.13981249 | 0.205544 |
| RGL2    | 50.9159819 | 49.38718 |
| RGL3    | 0.11163893 | 0.23251  |
| RGL4    | 13.8176872 | 13.27962 |
| RGMA    | 0          | 0.007427 |
| RGMB    | 0.03213479 | 0.026075 |
| RGN     | 0          | 0        |
| RGNEF   | 0.0040033  | 0.004548 |
| RGP1    | 8.51720583 | 8.45931  |
| RGPD1   | 1.01600166 | 0.684751 |
| RGPD2   | 1.27517816 | 0.755206 |
| RGPD3   | 0.30071987 | 0.353823 |
| RGPD4   | 0.120195   | 0.319711 |
| RGPD5   | 0.3130858  | 0.343406 |
| RGPD6   | 0.0934796  | 0.097584 |
| RGPD7   | 0.13363558 | 0.187958 |
| RGPD8   | 4.23922641 | 4.399135 |
| RGR     | 0          | 0        |
| RGS1    | 257.039541 | 334.3234 |
| RGS10   | 0.34538531 | 0.318795 |
| RGS11   | 0.00884905 | 0.010053 |
| RGS12   | 0.68248512 | 0.95554  |

|         |            |          |
|---------|------------|----------|
| RGS13   | 1.9088418  | 2.343866 |
| RGS14   | 74.2790163 | 83.58796 |
| RGS16   | 1.35730961 | 9.133697 |
| RGS17   | 0.07141756 | 0.064905 |
| RGS18   | 121.113748 | 86.38726 |
| RGS19   | 200.759602 | 273.0977 |
| RGS2    | 275.456866 | 178.8717 |
| RGS20   | 0.02734113 | 0.072473 |
| RGS21   | 0          | 0        |
| RGS22   | 0          | 0        |
| RGS3    | 2.80398373 | 5.086261 |
| RGS4    | 0          | 0        |
| RGS5    | 0.01443056 | 0.02459  |
| RGS6    | 0.00733101 | 0.008328 |
| RGS7    | 0          | 0.009789 |
| RGS7BP  | 0          | 0        |
| RGS8    | 0          | 0.02619  |
| RGS9    | 0.07783956 | 0.088427 |
| RGS9BP  | 0.05085602 | 0.041267 |
| RGSL1   | 0.00559184 | 0        |
| RHAG    | 0          | 0        |
| RHBDD1  | 2.51644489 | 1.98139  |
| RHBDD2  | 118.751696 | 110.51   |
| RHBDD3  | 0.32663057 | 0.233629 |
| RHBDF1  | 0.02108155 | 0        |
| RHBDF2  | 2.18770786 | 2.372605 |
| RHBDL1  | 1.45653351 | 1.271625 |
| RHBDL2  | 0          | 0.026004 |
| RHBDL3  | 0.00451091 | 0.005124 |
| RHBG    | 0.02350512 | 0.013351 |
| RHCE    | 0.03898393 | 0.073811 |
| RHCG    | 0.01085458 | 0        |
| RHD     | 1.33588407 | 1.264655 |
| RHEB    | 12.7063928 | 12.4663  |
| RHEBL1  | 0.14290794 | 0.162346 |
| RHEBP1  | 0          | 0        |
| RHO     | 0          | 0.017258 |
| RHOA    | 233.750922 | 234.8371 |
| RHOB    | 51.7860919 | 54.69256 |
| RHOBTB1 | 0.05605509 | 0.053066 |
| RHOBTB2 | 2.34397032 | 2.004147 |
| RHOBTB3 | 13.5535191 | 10.48782 |
| RHOC    | 0.14267652 | 0.162083 |
| RHOD    | 0          | 0.021081 |
| RHOF    | 41.8175268 | 67.47666 |
| RHOG    | 242.341248 | 269.545  |
| RHOH    | 36.6234129 | 38.9522  |

|         |            |          |
|---------|------------|----------|
| RHOJ    | 0.01103692 | 0        |
| RHOQ    | 17.9145819 | 10.93814 |
| RHOQP   | 0          | 0        |
| RHOT1   | 10.9796833 | 12.68242 |
| RHOT2   | 38.7477674 | 40.04522 |
| RHOU    | 3.92583112 | 3.000836 |
| RHOV    | 0.01801656 | 0        |
| RHOXF1  | 0.16708872 | 0.094908 |
| RHOXF2  | 0.14589667 | 0.036831 |
| RHOXF2B | 0.03212426 | 0.036494 |
| RHPN1   | 1.59034132 | 1.999534 |
| RHPN2   | 0.01801656 | 0.020467 |
| RIBC1   | 0.15761118 | 0.161144 |
| RIBC2   | 0.0602445  | 0.085548 |
| RIC3    | 0.06876937 | 0.106905 |
| RIC8A   | 18.3718751 | 17.47626 |
| RIC8B   | 0.83022453 | 0.713346 |
| RICH2   | 0.02964097 | 0.061733 |
| RICS    | 0.03622975 | 0.043444 |
| RICTOR  | 19.2256173 | 17.44843 |
| RIF1    | 3.17273573 | 2.732413 |
| RILP    | 3.25000931 | 3.478802 |
| RILPL1  | 0.55287646 | 0.85564  |
| RILPL2  | 105.287825 | 129.4956 |
| RIMBP2  | 0.01330296 | 0        |
| RIMBP3  | 0.15961259 | 0.403855 |
| RIMBP3B | 0.01551971 | 0.044077 |
| RIMBP3C | 0.01813779 | 0.045331 |
| RIMKLA  | 0.42174001 | 0.517522 |
| RIMKLB  | 1.28027315 | 1.106171 |
| RIMKLB2 | 0          | 0        |
| RIMS1   | 0          | 0.003295 |
| RIMS2   | 0.01034033 | 0.007831 |
| RIMS3   | 0.06398634 | 0.056169 |
| RIMS4   | 0          | 0.009301 |
| RIN1    | 0.08616939 | 0.160183 |
| RIN2    | 0.01981652 | 0.016884 |
| RIN3    | 132.128009 | 148.2068 |
| RING1   | 24.6787544 | 23.61025 |
| RINL    | 8.94324736 | 7.827295 |
| RINT1   | 5.53893127 | 5.192764 |
| RIOK1   | 3.98812523 | 4.021    |
| RIOK2   | 3.58073322 | 2.777035 |
| RIOK3   | 31.5979199 | 30.95889 |
| RIPK1   | 22.6522911 | 21.63506 |
| RIPK2   | 12.5094619 | 6.874476 |
| RIPK3   | 27.4500417 | 26.0237  |

|         |            |          |
|---------|------------|----------|
| RIPK4   | 0          | 0        |
| RIPPLY1 | 0          | 0        |
| RIPPLY2 | 0          | 0        |
| RIT1    | 28.2199844 | 31.65387 |
| RIT2    | 0          | 0        |
| RLBP1   | 0.14400912 | 0.122697 |
| RLBP1L1 | 0.012042   | 0.02736  |
| RLBP1L2 | 0          | 0.011883 |
| RLF     | 10.734693  | 10.42919 |
| RLFP    | 0          | 0        |
| RLIM    | 12.33945   | 12.50996 |
| RLN1    | 0          | 0        |
| RLN2    | 0          | 0        |
| RLN3    | 0          | 0        |
| RLTPR   | 0.61963467 | 0.794571 |
| RMI1    | 3.37993021 | 2.86266  |
| RMND1   | 0.96819944 | 0.837416 |
| RMND5A  | 13.1293551 | 14.62929 |
| RMND5B  | 14.3851407 | 15.83974 |
| RMRP    | 0          | 0        |
| RMST    | 0          | 0        |
| RN18S2P | 0          | 0        |
| RN5S1   | 0          | 0        |
| RN5S10  | 0          | 0        |
| RN5S11  | 0          | 0        |
| RN5S12  | 0          | 0        |
| RN5S13  | 0          | 0        |
| RN5S14  | 0          | 0        |
| RN5S15  | 0          | 0        |
| RN5S16  | 0          | 0        |
| RN5S17  | 0          | 0        |
| RN5S2   | 0          | 0        |
| RN5S3   | 0          | 0        |
| RN5S4   | 0          | 0        |
| RN5S5   | 0          | 0        |
| RN5S6   | 0          | 0        |
| RN5S7   | 0          | 0        |
| RN5S8   | 0          | 0        |
| RN5S9   | 0          | 0        |
| RN7SK   | 0          | 0        |
| RN7SL1  | 0          | 0        |
| RN7SL2  | 0          | 0        |
| RN7SL3  | 0          | 0        |
| RN7SLP1 | 0          | 0        |
| RN7SLP2 | 0          | 0        |
| RN7SLP3 | 0          | 0        |
| RN7SLP4 | 0          | 0        |



|            |            |          |
|------------|------------|----------|
| RN7SLP5    | 0          | 0        |
| RNASE1     | 0          | 0        |
| RNASE10    | 0          | 0        |
| RNASE11    | 0          | 0        |
| RNASE12    | 0          | 0        |
| RNASE13    | 0          | 0        |
| RNASE2     | 65.0211936 | 63.72612 |
| RNASE3     | 5.78490251 | 5.50425  |
| RNASE4     | 0.01110688 | 0.012618 |
| RNASE6     | 1.10972529 | 0.315166 |
| RNASE7     | 0.0140356  | 0.015945 |
| RNASE8     | 0          | 0        |
| RNASE9     | 0          | 0        |
| RNASEH1    | 5.54976879 | 5.101674 |
| RNASEH1P1  | 0          | 0        |
| RNASEH1P2  | 0          | 0        |
| RNASEH1P3  | 0          | 0        |
| RNASEH2A   | 1.45446685 | 1.401316 |
| RNASEH2B   | 2.82022468 | 2.319612 |
| RNASEH2C   | 3.06509313 | 2.90738  |
| RNASEH2CP1 | 0          | 0        |
| RNASEK     | 174.723873 | 159.4682 |
| RNASEL     | 17.7103439 | 14.85622 |
| RNASEN     | 2.7534082  | 2.250361 |
| RNASET2    | 276.222388 | 254.5579 |
| RND1       | 0.025439   | 0.028899 |
| RND2       | 0.01519171 | 0.011505 |
| RND3       | 0.015673   | 0        |
| RNF10      | 90.8182804 | 82.45237 |
| RNF103     | 42.4920911 | 47.68092 |
| RNF11      | 24.3836385 | 26.86104 |
| RNF111     | 14.5446087 | 15.31959 |
| RNF112     | 0.82155873 | 0.851173 |
| RNF113A    | 18.9989883 | 20.31247 |
| RNF113B    | 0          | 0        |
| RNF114     | 34.3717713 | 31.53377 |
| RNF115     | 13.8327849 | 12.97639 |
| RNF11P1    | 0          | 0        |
| RNF11P2    | 0          | 0        |
| RNF121     | 7.13215371 | 5.87504  |
| RNF122     | 10.692754  | 10.21638 |
| RNF123     | 4.21000752 | 4.193226 |
| RNF125     | 1.7211633  | 1.995835 |
| RNF126     | 9.38722197 | 9.777785 |
| RNF126P1   | 0          | 0        |
| RNF128     | 0          | 0        |
| RNF13      | 13.3101336 | 10.42406 |

|          |            |          |
|----------|------------|----------|
| RNF130   | 91.8762567 | 94.3895  |
| RNF133   | 0          | 0        |
| RNF135   | 5.27342254 | 4.5263   |
| RNF138   | 8.92412422 | 9.079957 |
| RNF138P1 | 0          | 0        |
| RNF139   | 12.8615098 | 13.03873 |
| RNF14    | 4.79364466 | 4.294119 |
| RNF141   | 6.14697482 | 6.918728 |
| RNF144A  | 29.4757558 | 20.72262 |
| RNF144B  | 7.77866691 | 5.460312 |
| RNF145   | 42.9261962 | 45.31919 |
| RNF146   | 21.8781066 | 20.1548  |
| RNF148   | 0          | 0        |
| RNF149   | 74.377537  | 78.57149 |
| RNF150   | 0.01353272 | 0        |
| RNF151   | 0.05282746 | 0.030006 |
| RNF152   | 0          | 0        |
| RNF157   | 0.02579268 | 0.009767 |
| RNF160   | 8.15301358 | 7.299175 |
| RNF165   | 0.00797018 | 0        |
| RNF166   | 223.491901 | 279.6682 |
| RNF167   | 51.8493525 | 39.3517  |
| RNF168   | 14.2166098 | 16.0781  |
| RNF169   | 8.66491973 | 6.952115 |
| RNF17    | 0          | 0        |
| RNF170   | 0.70425204 | 0.825849 |
| RNF175   | 0.01340047 | 0        |
| RNF180   | 0.0041552  | 0        |
| RNF181   | 42.8435166 | 38.12944 |
| RNF182   | 0          | 0        |
| RNF183   | 0          | 0        |
| RNF185   | 4.9486769  | 3.918883 |
| RNF186   | 0          | 0        |
| RNF187   | 20.7512577 | 18.46759 |
| RNF19A   | 13.0354287 | 13.78772 |
| RNF19B   | 88.5306817 | 104.7975 |
| RNF19BPY | 0          | 0        |
| RNF2     | 6.72029024 | 7.634356 |
| RNF20    | 10.6033839 | 9.663164 |
| RNF207   | 0.00529472 | 0.006015 |
| RNF208   | 0.27535513 | 0.402181 |
| RNF212   | 0.00802494 | 0        |
| RNF213   | 16.7839522 | 19.39202 |
| RNF214   | 2.61470831 | 2.053036 |
| RNF215   | 2.13316313 | 2.435734 |
| RNF216   | 34.3067868 | 33.68317 |
| RNF216L  | 0          | 0        |

|         |            |          |
|---------|------------|----------|
| RNF217  | 0.023571   | 0.026777 |
| RNF219  | 4.21220552 | 4.156577 |
| RNF220  | 18.755154  | 17.46549 |
| RNF222  | 0.06342483 | 0.072052 |
| RNF24   | 50.0569379 | 37.24628 |
| RNF25   | 10.5059309 | 11.21575 |
| RNF26   | 2.83004275 | 2.477673 |
| RNF2P   | 0          | 0        |
| RNF31   | 23.8160948 | 23.06565 |
| RNF32   | 1.77017391 | 1.45007  |
| RNF34   | 20.3667061 | 17.04764 |
| RNF38   | 17.3131995 | 16.3056  |
| RNF39   | 0.98828745 | 1.364863 |
| RNF4    | 21.510476  | 22.41812 |
| RNF40   | 34.739231  | 35.50886 |
| RNF41   | 23.7428077 | 26.13973 |
| RNF43   | 0.20296502 | 0.272494 |
| RNF44   | 52.6924259 | 53.99312 |
| RNF5    | 21.5246132 | 18.90642 |
| RNF5P1  | 0          | 0        |
| RNF6    | 16.0585013 | 14.41461 |
| RNF7    | 11.0715001 | 10.75502 |
| RNF8    | 0.34351455 | 0.347821 |
| RNFT1   | 22.2142634 | 25.70967 |
| RNFT2   | 0.02176535 | 0.024726 |
| RNGTT   | 3.08572525 | 2.879272 |
| RNH1    | 11.0528798 | 11.63299 |
| RNLS    | 0.08714342 | 0.053998 |
| RNMT    | 7.50783622 | 7.300688 |
| RNMTL1  | 1.33086492 | 1.405787 |
| RNPC3   | 14.2620157 | 13.06276 |
| RNPEP   | 16.8864863 | 16.07518 |
| RNPEPL1 | 108.641703 | 144.27   |
| RNPS1   | 42.4971458 | 47.41286 |
| RNR1    | 0          | 0        |
| RNR2    | 0          | 0        |
| RNU105A | 0          | 0        |
| RNU105B | 0          | 0        |
| RNU105C | 0          | 0        |
| RNU11   | 0          | 0        |
| RNU12   | 0          | 0        |
| RNU12P  | 0          | 0        |
| RNU13P1 | 0          | 0        |
| RNU13P2 | 0          | 0        |
| RNU13P3 | 0          | 0        |
| RNU1A   | 0          | 0        |
| RNU1A3  | 0          | 0        |

|            |   |   |
|------------|---|---|
| RNU1C1     | 0 | 0 |
| RNU1C2     | 0 | 0 |
| RNU1D2     | 0 | 0 |
| RNU1F1     | 0 | 0 |
| RNU1G1     | 0 | 0 |
| RNU1G3     | 0 | 0 |
| RNU1P10    | 0 | 0 |
| RNU1P5     | 0 | 0 |
| RNU1P6     | 0 | 0 |
| RNU1P7     | 0 | 0 |
| RNU1P8     | 0 | 0 |
| RNU1P9     | 0 | 0 |
| RNU2-1     | 0 | 0 |
| RNU2-2     | 0 | 0 |
| RNU2P1     | 0 | 0 |
| RNU2P2     | 0 | 0 |
| RNU2P3     | 0 | 0 |
| RNU3P3     | 0 | 0 |
| RNU4-1     | 0 | 0 |
| RNU4-1B    | 0 | 0 |
| RNU4-2     | 0 | 0 |
| RNU4ATAC   | 0 | 0 |
| RNU4P1     | 0 | 0 |
| RNU4P2     | 0 | 0 |
| RNU4P3     | 0 | 0 |
| RNU4P4     | 0 | 0 |
| RNU4P5     | 0 | 0 |
| RNU4P6     | 0 | 0 |
| RNU5A      | 0 | 0 |
| RNU5B-1    | 0 | 0 |
| RNU5B-2P   | 0 | 0 |
| RNU5B-3P   | 0 | 0 |
| RNU5B-4P   | 0 | 0 |
| RNU5B-5P   | 0 | 0 |
| RNU5B-6P   | 0 | 0 |
| RNU5D      | 0 | 0 |
| RNU5E      | 0 | 0 |
| RNU5F      | 0 | 0 |
| RNU6-1     | 0 | 0 |
| RNU6-2     | 0 | 0 |
| RNU6ATAC   | 0 | 0 |
| RNU6ATAC2P | 0 | 0 |
| RNU6ATAC3P | 0 | 0 |
| RNU6ATAC4P | 0 | 0 |
| RNU6ATAC5P | 0 | 0 |
| RNU6P1     | 0 | 0 |
| RNU6V      | 0 | 0 |

|          |   |   |
|----------|---|---|
| RNU7     | 0 | 0 |
| RNU7-10P | 0 | 0 |
| RNU7-11P | 0 | 0 |
| RNU7-12P | 0 | 0 |
| RNU7-13P | 0 | 0 |
| RNU7-14P | 0 | 0 |
| RNU7-15P | 0 | 0 |
| RNU7-16P | 0 | 0 |
| RNU7-17P | 0 | 0 |
| RNU7-18P | 0 | 0 |
| RNU7-19P | 0 | 0 |
| RNU7-20P | 0 | 0 |
| RNU7-21P | 0 | 0 |
| RNU7-23P | 0 | 0 |
| RNU7-24P | 0 | 0 |
| RNU7-25P | 0 | 0 |
| RNU7-26P | 0 | 0 |
| RNU7-27P | 0 | 0 |
| RNU7-28P | 0 | 0 |
| RNU7-29P | 0 | 0 |
| RNU7-2P  | 0 | 0 |
| RNU7-30P | 0 | 0 |
| RNU7-31P | 0 | 0 |
| RNU7-32P | 0 | 0 |
| RNU7-33P | 0 | 0 |
| RNU7-34P | 0 | 0 |
| RNU7-35P | 0 | 0 |
| RNU7-36P | 0 | 0 |
| RNU7-37P | 0 | 0 |
| RNU7-38P | 0 | 0 |
| RNU7-39P | 0 | 0 |
| RNU7-3P  | 0 | 0 |
| RNU7-40P | 0 | 0 |
| RNU7-41P | 0 | 0 |
| RNU7-42P | 0 | 0 |
| RNU7-43P | 0 | 0 |
| RNU7-44P | 0 | 0 |
| RNU7-45P | 0 | 0 |
| RNU7-46P | 0 | 0 |
| RNU7-47P | 0 | 0 |
| RNU7-48P | 0 | 0 |
| RNU7-49P | 0 | 0 |
| RNU7-4P  | 0 | 0 |
| RNU7-50P | 0 | 0 |
| RNU7-51P | 0 | 0 |
| RNU7-52P | 0 | 0 |
| RNU7-53P | 0 | 0 |

|          |   |   |
|----------|---|---|
| RNU7-54P | 0 | 0 |
| RNU7-55P | 0 | 0 |
| RNU7-56P | 0 | 0 |
| RNU7-57P | 0 | 0 |
| RNU7-58P | 0 | 0 |
| RNU7-59P | 0 | 0 |
| RNU7-5P  | 0 | 0 |
| RNU7-60P | 0 | 0 |
| RNU7-61P | 0 | 0 |
| RNU7-62P | 0 | 0 |
| RNU7-63P | 0 | 0 |
| RNU7-64P | 0 | 0 |
| RNU7-65P | 0 | 0 |
| RNU7-66P | 0 | 0 |
| RNU7-67P | 0 | 0 |
| RNU7-68P | 0 | 0 |
| RNU7-69P | 0 | 0 |
| RNU7-6P  | 0 | 0 |
| RNU7-70P | 0 | 0 |
| RNU7-71P | 0 | 0 |
| RNU7-72P | 0 | 0 |
| RNU7-73P | 0 | 0 |
| RNU7-74P | 0 | 0 |
| RNU7-75P | 0 | 0 |
| RNU7-76P | 0 | 0 |
| RNU7-77P | 0 | 0 |
| RNU7-78P | 0 | 0 |
| RNU7-79P | 0 | 0 |
| RNU7-7P  | 0 | 0 |
| RNU7-80P | 0 | 0 |
| RNU7-81P | 0 | 0 |
| RNU7-82P | 0 | 0 |
| RNU7-83P | 0 | 0 |
| RNU7-84P | 0 | 0 |
| RNU7-85P | 0 | 0 |
| RNU7-86P | 0 | 0 |
| RNU7-8P  | 0 | 0 |
| RNU7-9P  | 0 | 0 |
| RNU86    | 0 | 0 |
| RNY1     | 0 | 0 |
| RNY3     | 0 | 0 |
| RNY4     | 0 | 0 |
| RNY4P1   | 0 | 0 |
| RNY4P19  | 0 | 0 |
| RNY4P2   | 0 | 0 |
| RNY4P3   | 0 | 0 |
| RNY4P7   | 0 | 0 |

|               |            |          |
|---------------|------------|----------|
| RNY5          | 0          | 0        |
| RNY5P10       | 0          | 0        |
| RNY5P7        | 0          | 0        |
| RNY5P9        | 0          | 0        |
| ROBLD3        | 14.4182519 | 11.96009 |
| ROBO1         | 0.00549898 | 0.006247 |
| ROBO2         | 0.00336998 | 0.011485 |
| ROBO3         | 0.42796143 | 0.653456 |
| ROBO4         | 0          | 0.006225 |
| ROCK1         | 40.7923038 | 39.73548 |
| ROCK2         | 5.68909127 | 5.391967 |
| ROD1          | 38.840155  | 43.51847 |
| ROGDI         | 3.67726982 | 3.685974 |
| ROM1          | 0.94043014 | 1.068344 |
| ROMO1         | 12.222969  | 10.93223 |
| ROPN1         | 0          | 0        |
| ROPN1B        | 0.08401731 | 0.047722 |
| ROPN1L        | 3.89059336 | 2.656446 |
| ROR1          | 0.03067898 | 0.005809 |
| ROR2          | 0.01027882 | 0.011677 |
| RORA          | 0.06744146 | 0.072473 |
| RORB          | 0.00583389 | 0        |
| RORC          | 0.01308359 | 0.007432 |
| ROS1          | 0.0028536  | 0.003242 |
| RP1           | 0          | 0        |
| RP11-45B20.2  | 0          | 0        |
| RP11-529I10.4 | 0.07894367 | 0.029894 |
| RP1-177G6.2   | 0          | 0.017296 |
| RP1L1         | 0.01054166 | 0.005988 |
| RP2           | 16.5963458 | 15.01938 |
| RP5-1022P6.2  | 79.7683879 | 107.6339 |
| RP9           | 4.10753567 | 4.048324 |
| RP9P          | 0          | 0        |
| RPA1          | 13.9362378 | 13.25912 |
| RPA2          | 29.6188238 | 25.81536 |
| RPA2P         | 0          | 0        |
| RPA3          | 2.20277934 | 1.678251 |
| RPA4          | 0          | 0        |
| RPAIN         | 13.4644302 | 11.95033 |
| RPAP1         | 0.99006267 | 0.828208 |
| RPAP2         | 1.36275293 | 1.366443 |
| RPAP3         | 10.6244033 | 6.674714 |
| RPE           | 2.88469849 | 2.687192 |
| RPE65         | 0          | 0        |
| RPGR          | 2.03376037 | 2.03882  |
| RPGRIP1       | 0.3729785  | 0.187643 |
| RPGRIP1L      | 0.04421373 | 0.030909 |

|             |            |          |
|-------------|------------|----------|
| RPH3A       | 0.01373008 | 0.005199 |
| RPH3AL      | 0.39870016 | 0.415956 |
| RPIA        | 8.1625058  | 6.902458 |
| RPL10       | 49.1074814 | 48.12056 |
| RPL10A      | 23.3354855 | 22.52309 |
| RPL10AP1    | 0          | 0        |
| RPL10AP10   | 0          | 0        |
| RPL10AP11   | 0          | 0        |
| RPL10AP12   | 0          | 0        |
| RPL10AP13   | 0          | 0        |
| RPL10AP2    | 0          | 0        |
| RPL10AP3    | 0          | 0        |
| RPL10AP4    | 0          | 0        |
| RPL10AP5    | 0          | 0        |
| RPL10AP6    | 0          | 0        |
| RPL10AP7    | 0          | 0        |
| RPL10AP8    | 0          | 0        |
| RPL10AP9    | 0          | 0        |
| RPL10L      | 0.05172283 | 0        |
| RPL10P1     | 0          | 0        |
| RPL10P10    | 0          | 0        |
| RPL10P11    | 0          | 0        |
| RPL10P12    | 0          | 0        |
| RPL10P13    | 0          | 0        |
| RPL10P14    | 0          | 0        |
| RPL10P15    | 0          | 0        |
| RPL10P16    | 0          | 0        |
| RPL10P2     | 0          | 0        |
| RPL10P3     | 0          | 0        |
| RPL10P4     | 0          | 0        |
| RPL10P5     | 0          | 0        |
| RPL10P6     | 0          | 0        |
| RPL10P7     | 0          | 0        |
| RPL10P8     | 0          | 0        |
| RPL10P9     | 0          | 0        |
| RPL11       | 184.808861 | 174.8437 |
| RPL11P1     | 0          | 0        |
| RPL11P2     | 0          | 0        |
| RPL11P3     | 0          | 0        |
| RPL11P4     | 0          | 0        |
| RPL11P5     | 0          | 0        |
| RPL12       | 90.4655682 | 82.21626 |
| RPL12_2_212 | 0          | 0        |
| RPL12P1     | 0          | 0        |
| RPL12P10    | 0          | 0        |
| RPL12P11    | 0          | 0        |
| RPL12P12    | 0          | 0        |



|           |            |          |
|-----------|------------|----------|
| RPL12P13  | 0          | 0        |
| RPL12P14  | 0          | 0        |
| RPL12P15  | 0          | 0        |
| RPL12P16  | 0          | 0        |
| RPL12P17  | 0          | 0        |
| RPL12P18  | 0          | 0        |
| RPL12P2   | 0          | 0        |
| RPL12P20  | 0          | 0        |
| RPL12P21  | 0          | 0        |
| RPL12P22  | 0          | 0        |
| RPL12P23  | 0          | 0        |
| RPL12P24  | 0          | 0        |
| RPL12P25  | 0          | 0        |
| RPL12P26  | 0          | 0        |
| RPL12P27  | 0          | 0        |
| RPL12P28  | 0          | 0        |
| RPL12P29  | 0          | 0        |
| RPL12P3   | 0          | 0        |
| RPL12P30  | 0          | 0        |
| RPL12P31  | 0          | 0        |
| RPL12P32  | 0          | 0        |
| RPL12P33  | 0          | 0        |
| RPL12P34  | 0          | 0        |
| RPL12P35  | 0          | 0        |
| RPL12P36  | 0          | 0        |
| RPL12P37  | 0          | 0        |
| RPL12P38  | 0          | 0        |
| RPL12P39  | 0          | 0        |
| RPL12P4   | 0          | 0        |
| RPL12P40  | 0          | 0        |
| RPL12P41  | 0          | 0        |
| RPL12P42  | 0          | 0        |
| RPL12P43  | 0          | 0        |
| RPL12P5   | 0          | 0        |
| RPL12P6   | 0          | 0        |
| RPL12P7   | 0          | 0        |
| RPL12P8   | 0          | 0        |
| RPL12P9   | 0          | 0        |
| RPL13     | 63.0436959 | 65.05115 |
| RPL13A    | 152.512938 | 143.7557 |
| RPL13AP   | 0          | 0        |
| RPL13AP10 | 0          | 0        |
| RPL13AP11 | 0          | 0        |
| RPL13AP12 | 0          | 0        |
| RPL13AP13 | 0          | 0        |
| RPL13AP14 | 0          | 0        |
| RPL13AP15 | 0          | 0        |

|                |            |          |
|----------------|------------|----------|
| RPL13AP16      | 0          | 0        |
| RPL13AP17      | 0          | 0        |
| RPL13AP18      | 0          | 0        |
| RPL13AP19      | 0          | 0        |
| RPL13AP2       | 0          | 0        |
| RPL13AP20      | 0          | 0        |
| RPL13AP21      | 0          | 0        |
| RPL13AP22      | 0          | 0        |
| RPL13AP23      | 0          | 0        |
| RPL13AP24      | 0          | 0        |
| RPL13AP25      | 0          | 0        |
| RPL13AP26      | 0          | 0        |
| RPL13AP3       | 0          | 0        |
| RPL13AP5       | 0          | 0        |
| RPL13AP6       | 0          | 0        |
| RPL13AP7       | 0          | 0        |
| RPL13AP8       | 0          | 0        |
| RPL13AP9       | 0          | 0        |
| RPL13P         | 0          | 0        |
| RPL13P10       | 0          | 0        |
| RPL13P11       | 0          | 0        |
| RPL13P12       | 0          | 0        |
| RPL13P13       | 0          | 0        |
| RPL13P14       | 0          | 0        |
| RPL13P2        | 0          | 0        |
| RPL13P4        | 0          | 0        |
| RPL13P5        | 0          | 0        |
| RPL13P6        | 0          | 0        |
| RPL13P7        | 0          | 0        |
| RPL13P8        | 0          | 0        |
| RPL13P9        | 0          | 0        |
| RPL14          | 89.2354163 | 81.5275  |
| RPL14P1        | 0          | 0        |
| RPL14P2        | 0          | 0        |
| RPL14P3        | 0          | 0        |
| RPL14P4        | 0          | 0        |
| RPL14P5 (NC_00 | 0          | 0        |
| RPL14P5 (NC_00 | 0          | 0        |
| RPL15          | 44.1711293 | 41.53828 |
| RPL15P1        | 0          | 0        |
| RPL15P10       | 0          | 0        |
| RPL15P11       | 0          | 0        |
| RPL15P12       | 0          | 0        |
| RPL15P13       | 0          | 0        |
| RPL15P14       | 0          | 0        |
| RPL15P15       | 0          | 0        |
| RPL15P16       | 0          | 0        |

|          |            |          |
|----------|------------|----------|
| RPL15P17 | 0          | 0        |
| RPL15P18 | 0          | 0        |
| RPL15P19 | 0          | 0        |
| RPL15P2  | 0          | 0        |
| RPL15P20 | 0          | 0        |
| RPL15P21 | 0          | 0        |
| RPL15P22 | 0          | 0        |
| RPL15P3  | 0          | 0        |
| RPL15P4  | 0          | 0        |
| RPL15P5  | 0          | 0        |
| RPL15P6  | 0          | 0        |
| RPL15P7  | 0          | 0        |
| RPL15P8  | 0          | 0        |
| RPL15P9  | 0          | 0        |
| RPL17    | 52.8230388 | 52.31121 |
| RPL17P1  | 0          | 0        |
| RPL17P10 | 0          | 0        |
| RPL17P11 | 0          | 0        |
| RPL17P12 | 0          | 0        |
| RPL17P13 | 0          | 0        |
| RPL17P14 | 0          | 0        |
| RPL17P15 | 0          | 0        |
| RPL17P16 | 0          | 0        |
| RPL17P17 | 0          | 0        |
| RPL17P18 | 0          | 0        |
| RPL17P19 | 0          | 0        |
| RPL17P2  | 0          | 0        |
| RPL17P20 | 0          | 0        |
| RPL17P21 | 0          | 0        |
| RPL17P22 | 0          | 0        |
| RPL17P23 | 0          | 0        |
| RPL17P24 | 0          | 0        |
| RPL17P25 | 0          | 0        |
| RPL17P26 | 0          | 0        |
| RPL17P27 | 0          | 0        |
| RPL17P28 | 0          | 0        |
| RPL17P29 | 0          | 0        |
| RPL17P3  | 0          | 0        |
| RPL17P30 | 0          | 0        |
| RPL17P31 | 0          | 0        |
| RPL17P32 | 0          | 0        |
| RPL17P33 | 0          | 0        |
| RPL17P34 | 0          | 0        |
| RPL17P35 | 0          | 0        |
| RPL17P36 | 0          | 0        |
| RPL17P37 | 0          | 0        |
| RPL17P38 | 0          | 0        |

|           |            |          |
|-----------|------------|----------|
| RPL17P39  | 0          | 0        |
| RPL17P4   | 0          | 0        |
| RPL17P40  | 0          | 0        |
| RPL17P41  | 0          | 0        |
| RPL17P42  | 0          | 0        |
| RPL17P43  | 0          | 0        |
| RPL17P44  | 0          | 0        |
| RPL17P45  | 0          | 0        |
| RPL17P46  | 0          | 0        |
| RPL17P47  | 0          | 0        |
| RPL17P48  | 0          | 0        |
| RPL17P49  | 0          | 0        |
| RPL17P5   | 0          | 0        |
| RPL17P6   | 0          | 0        |
| RPL17P7   | 0          | 0        |
| RPL17P8   | 0          | 0        |
| RPL17P9   | 0          | 0        |
| RPL18     | 79.3780046 | 77.91539 |
| RPL18A    | 9.01571635 | 8.696035 |
| RPL18AP1  | 0          | 0        |
| RPL18AP10 | 0          | 0        |
| RPL18AP11 | 0          | 0        |
| RPL18AP12 | 0          | 0        |
| RPL18AP13 | 0          | 0        |
| RPL18AP14 | 0          | 0        |
| RPL18AP15 | 0          | 0        |
| RPL18AP16 | 0          | 0        |
| RPL18AP2  | 0          | 0        |
| RPL18AP3  | 0          | 0        |
| RPL18AP4  | 0          | 0        |
| RPL18AP5  | 0          | 0        |
| RPL18AP6  | 0          | 0        |
| RPL18AP7  | 0          | 0        |
| RPL18AP8  | 0          | 0        |
| RPL18AP9  | 0          | 0        |
| RPL18P1   | 0          | 0        |
| RPL18P10  | 0          | 0        |
| RPL18P11  | 0          | 0        |
| RPL18P12  | 0          | 0        |
| RPL18P13  | 0          | 0        |
| RPL18P2   | 0          | 0        |
| RPL18P3   | 0          | 0        |
| RPL18P4   | 0          | 0        |
| RPL18P5   | 0          | 0        |
| RPL18P6   | 0          | 0        |
| RPL18P7   | 0          | 0        |
| RPL18P8   | 0          | 0        |

|           |            |          |
|-----------|------------|----------|
| RPL18P9   | 0          | 0        |
| RPL19     | 151.141109 | 143.6043 |
| RPL19P1   | 0          | 0        |
| RPL19P10  | 0          | 0        |
| RPL19P11  | 0          | 0        |
| RPL19P12  | 0          | 0        |
| RPL19P13  | 0          | 0        |
| RPL19P14  | 0          | 0        |
| RPL19P15  | 0          | 0        |
| RPL19P16  | 0          | 0        |
| RPL19P17  | 0          | 0        |
| RPL19P18  | 0          | 0        |
| RPL19P19  | 0          | 0        |
| RPL19P2   | 0          | 0        |
| RPL19P20  | 0          | 0        |
| RPL19P21  | 0          | 0        |
| RPL19P3   | 0          | 0        |
| RPL19P4   | 0          | 0        |
| RPL19P5   | 0          | 0        |
| RPL19P6   | 0          | 0        |
| RPL19P7   | 0          | 0        |
| RPL19P8   | 0          | 0        |
| RPL19P9   | 0          | 0        |
| RPL21     | 15.2609168 | 13.18089 |
| RPL21P1   | 0          | 0        |
| RPL21P10  | 0          | 0        |
| RPL21P100 | 0          | 0        |
| RPL21P101 | 0          | 0        |
| RPL21P102 | 0          | 0        |
| RPL21P103 | 0          | 0        |
| RPL21P104 | 0          | 0        |
| RPL21P105 | 0          | 0        |
| RPL21P106 | 0          | 0        |
| RPL21P107 | 0          | 0        |
| RPL21P108 | 0          | 0        |
| RPL21P109 | 0          | 0        |
| RPL21P11  | 0          | 0        |
| RPL21P110 | 0          | 0        |
| RPL21P111 | 0          | 0        |
| RPL21P112 | 0          | 0        |
| RPL21P113 | 0          | 0        |
| RPL21P114 | 0          | 0        |
| RPL21P115 | 0          | 0        |
| RPL21P116 | 0          | 0        |
| RPL21P117 | 0          | 0        |
| RPL21P118 | 0          | 0        |
| RPL21P119 | 0          | 0        |

|           |   |   |
|-----------|---|---|
| RPL21P12  | 0 | 0 |
| RPL21P120 | 0 | 0 |
| RPL21P121 | 0 | 0 |
| RPL21P122 | 0 | 0 |
| RPL21P123 | 0 | 0 |
| RPL21P124 | 0 | 0 |
| RPL21P125 | 0 | 0 |
| RPL21P126 | 0 | 0 |
| RPL21P127 | 0 | 0 |
| RPL21P128 | 0 | 0 |
| RPL21P129 | 0 | 0 |
| RPL21P13  | 0 | 0 |
| RPL21P130 | 0 | 0 |
| RPL21P131 | 0 | 0 |
| RPL21P132 | 0 | 0 |
| RPL21P133 | 0 | 0 |
| RPL21P134 | 0 | 0 |
| RPL21P14  | 0 | 0 |
| RPL21P15  | 0 | 0 |
| RPL21P16  | 0 | 0 |
| RPL21P17  | 0 | 0 |
| RPL21P18  | 0 | 0 |
| RPL21P19  | 0 | 0 |
| RPL21P2   | 0 | 0 |
| RPL21P20  | 0 | 0 |
| RPL21P21  | 0 | 0 |
| RPL21P22  | 0 | 0 |
| RPL21P23  | 0 | 0 |
| RPL21P24  | 0 | 0 |
| RPL21P25  | 0 | 0 |
| RPL21P26  | 0 | 0 |
| RPL21P27  | 0 | 0 |
| RPL21P28  | 0 | 0 |
| RPL21P29  | 0 | 0 |
| RPL21P3   | 0 | 0 |
| RPL21P30  | 0 | 0 |
| RPL21P31  | 0 | 0 |
| RPL21P32  | 0 | 0 |
| RPL21P33  | 0 | 0 |
| RPL21P34  | 0 | 0 |
| RPL21P35  | 0 | 0 |
| RPL21P36  | 0 | 0 |
| RPL21P37  | 0 | 0 |
| RPL21P38  | 0 | 0 |
| RPL21P39  | 0 | 0 |
| RPL21P4   | 0 | 0 |
| RPL21P40  | 0 | 0 |

|          |   |   |
|----------|---|---|
| RPL21P41 | 0 | 0 |
| RPL21P42 | 0 | 0 |
| RPL21P43 | 0 | 0 |
| RPL21P44 | 0 | 0 |
| RPL21P45 | 0 | 0 |
| RPL21P46 | 0 | 0 |
| RPL21P47 | 0 | 0 |
| RPL21P48 | 0 | 0 |
| RPL21P49 | 0 | 0 |
| RPL21P5  | 0 | 0 |
| RPL21P50 | 0 | 0 |
| RPL21P51 | 0 | 0 |
| RPL21P52 | 0 | 0 |
| RPL21P53 | 0 | 0 |
| RPL21P54 | 0 | 0 |
| RPL21P55 | 0 | 0 |
| RPL21P56 | 0 | 0 |
| RPL21P57 | 0 | 0 |
| RPL21P58 | 0 | 0 |
| RPL21P59 | 0 | 0 |
| RPL21P6  | 0 | 0 |
| RPL21P60 | 0 | 0 |
| RPL21P61 | 0 | 0 |
| RPL21P62 | 0 | 0 |
| RPL21P63 | 0 | 0 |
| RPL21P64 | 0 | 0 |
| RPL21P65 | 0 | 0 |
| RPL21P66 | 0 | 0 |
| RPL21P67 | 0 | 0 |
| RPL21P68 | 0 | 0 |
| RPL21P69 | 0 | 0 |
| RPL21P7  | 0 | 0 |
| RPL21P70 | 0 | 0 |
| RPL21P71 | 0 | 0 |
| RPL21P72 | 0 | 0 |
| RPL21P73 | 0 | 0 |
| RPL21P74 | 0 | 0 |
| RPL21P75 | 0 | 0 |
| RPL21P76 | 0 | 0 |
| RPL21P77 | 0 | 0 |
| RPL21P78 | 0 | 0 |
| RPL21P79 | 0 | 0 |
| RPL21P8  | 0 | 0 |
| RPL21P80 | 0 | 0 |
| RPL21P81 | 0 | 0 |
| RPL21P82 | 0 | 0 |
| RPL21P83 | 0 | 0 |

|           |            |          |
|-----------|------------|----------|
| RPL21P84  | 0          | 0        |
| RPL21P85  | 0          | 0        |
| RPL21P86  | 0          | 0        |
| RPL21P87  | 0          | 0        |
| RPL21P88  | 0          | 0        |
| RPL21P89  | 0          | 0        |
| RPL21P9   | 0          | 0        |
| RPL21P90  | 0          | 0        |
| RPL21P91  | 0          | 0        |
| RPL21P92  | 0          | 0        |
| RPL21P93  | 0          | 0        |
| RPL21P94  | 0          | 0        |
| RPL21P95  | 0          | 0        |
| RPL21P96  | 0          | 0        |
| RPL21P97  | 0          | 0        |
| RPL21P98  | 0          | 0        |
| RPL21P99  | 0          | 0        |
| RPL22     | 6.29247315 | 4.857212 |
| RPL22L1   | 1.67088723 | 1.825148 |
| RPL22P1   | 0          | 0        |
| RPL22P10  | 0          | 0        |
| RPL22P11  | 0          | 0        |
| RPL22P12  | 0          | 0        |
| RPL22P13  | 0          | 0        |
| RPL22P14  | 0          | 0        |
| RPL22P15  | 0          | 0        |
| RPL22P16  | 0          | 0        |
| RPL22P17  | 0          | 0        |
| RPL22P18  | 0          | 0        |
| RPL22P19  | 0          | 0        |
| RPL22P2   | 0          | 0        |
| RPL22P20  | 0          | 0        |
| RPL22P21  | 0          | 0        |
| RPL22P22  | 0          | 0        |
| RPL22P3   | 0          | 0        |
| RPL22P4   | 0          | 0        |
| RPL22P5   | 0          | 0        |
| RPL22P6   | 0          | 0        |
| RPL22P7   | 0          | 0        |
| RPL22P8   | 0          | 0        |
| RPL23     | 104.434313 | 99.96974 |
| RPL23A    | 38.6042417 | 36.02465 |
| RPL23AP1  | 0          | 0        |
| RPL23AP10 | 0          | 0        |
| RPL23AP11 | 0          | 0        |
| RPL23AP12 | 0          | 0        |
| RPL23AP14 | 0          | 0        |



|           |   |   |
|-----------|---|---|
| RPL23AP15 | 0 | 0 |
| RPL23AP16 | 0 | 0 |
| RPL23AP17 | 0 | 0 |
| RPL23AP18 | 0 | 0 |
| RPL23AP19 | 0 | 0 |
| RPL23AP2  | 0 | 0 |
| RPL23AP20 | 0 | 0 |
| RPL23AP21 | 0 | 0 |
| RPL23AP22 | 0 | 0 |
| RPL23AP23 | 0 | 0 |
| RPL23AP24 | 0 | 0 |
| RPL23AP25 | 0 | 0 |
| RPL23AP26 | 0 | 0 |
| RPL23AP27 | 0 | 0 |
| RPL23AP28 | 0 | 0 |
| RPL23AP29 | 0 | 0 |
| RPL23AP3  | 0 | 0 |
| RPL23AP30 | 0 | 0 |
| RPL23AP31 | 0 | 0 |
| RPL23AP32 | 0 | 0 |
| RPL23AP33 | 0 | 0 |
| RPL23AP34 | 0 | 0 |
| RPL23AP35 | 0 | 0 |
| RPL23AP36 | 0 | 0 |
| RPL23AP37 | 0 | 0 |
| RPL23AP38 | 0 | 0 |
| RPL23AP39 | 0 | 0 |
| RPL23AP4  | 0 | 0 |
| RPL23AP40 | 0 | 0 |
| RPL23AP41 | 0 | 0 |
| RPL23AP42 | 0 | 0 |
| RPL23AP43 | 0 | 0 |
| RPL23AP44 | 0 | 0 |
| RPL23AP45 | 0 | 0 |
| RPL23AP46 | 0 | 0 |
| RPL23AP47 | 0 | 0 |
| RPL23AP48 | 0 | 0 |
| RPL23AP49 | 0 | 0 |
| RPL23AP5  | 0 | 0 |
| RPL23AP50 | 0 | 0 |
| RPL23AP51 | 0 | 0 |
| RPL23AP52 | 0 | 0 |
| RPL23AP53 | 0 | 0 |
| RPL23AP54 | 0 | 0 |
| RPL23AP55 | 0 | 0 |
| RPL23AP56 | 0 | 0 |
| RPL23AP57 | 0 | 0 |

|           |            |         |
|-----------|------------|---------|
| RPL23AP58 | 0          | 0       |
| RPL23AP59 | 0          | 0       |
| RPL23AP6  | 0          | 0       |
| RPL23AP60 | 0          | 0       |
| RPL23AP61 | 0          | 0       |
| RPL23AP62 | 0          | 0       |
| RPL23AP63 | 0          | 0       |
| RPL23AP64 | 0          | 0       |
| RPL23AP65 | 0          | 0       |
| RPL23AP66 | 0          | 0       |
| RPL23AP67 | 0          | 0       |
| RPL23AP68 | 0          | 0       |
| RPL23AP69 | 0          | 0       |
| RPL23AP7  | 0          | 0       |
| RPL23AP70 | 0          | 0       |
| RPL23AP71 | 0          | 0       |
| RPL23AP72 | 0          | 0       |
| RPL23AP73 | 0          | 0       |
| RPL23AP74 | 0          | 0       |
| RPL23AP75 | 0          | 0       |
| RPL23AP76 | 0          | 0       |
| RPL23AP77 | 0          | 0       |
| RPL23AP78 | 0          | 0       |
| RPL23AP79 | 0          | 0       |
| RPL23AP8  | 0          | 0       |
| RPL23AP80 | 0          | 0       |
| RPL23AP81 | 0          | 0       |
| RPL23AP82 | 0          | 0       |
| RPL23AP83 | 0          | 0       |
| RPL23P10  | 0          | 0       |
| RPL23P11  | 0          | 0       |
| RPL23P2   | 0          | 0       |
| RPL23P3   | 0          | 0       |
| RPL23P4   | 0          | 0       |
| RPL23P5   | 0          | 0       |
| RPL23P6   | 0          | 0       |
| RPL23P7   | 0          | 0       |
| RPL23P8   | 0          | 0       |
| RPL23P9   | 0          | 0       |
| RPL24     | 72.4663097 | 65.0253 |
| RPL24P1   | 0          | 0       |
| RPL24P2   | 0          | 0       |
| RPL24P3   | 0          | 0       |
| RPL24P4   | 0          | 0       |
| RPL24P5   | 0          | 0       |
| RPL24P6   | 0          | 0       |
| RPL24P7   | 0          | 0       |

|          |            |          |
|----------|------------|----------|
| RPL24P8  | 0          | 0        |
| RPL24P9  | 0          | 0        |
| RPL26    | 107.510971 | 96.73059 |
| RPL26L1  | 2.72440908 | 2.758562 |
| RPL26P10 | 0          | 0        |
| RPL26P11 | 0          | 0        |
| RPL26P12 | 0          | 0        |
| RPL26P13 | 0          | 0        |
| RPL26P14 | 0          | 0        |
| RPL26P15 | 0          | 0        |
| RPL26P16 | 0          | 0        |
| RPL26P17 | 0          | 0        |
| RPL26P18 | 0          | 0        |
| RPL26P19 | 0          | 0        |
| RPL26P2  | 0          | 0        |
| RPL26P20 | 0          | 0        |
| RPL26P21 | 0          | 0        |
| RPL26P22 | 0          | 0        |
| RPL26P23 | 0          | 0        |
| RPL26P24 | 0          | 0        |
| RPL26P25 | 0          | 0        |
| RPL26P26 | 0          | 0        |
| RPL26P27 | 0          | 0        |
| RPL26P28 | 0          | 0        |
| RPL26P29 | 0          | 0        |
| RPL26P3  | 0          | 0        |
| RPL26P30 | 0          | 0        |
| RPL26P31 | 0          | 0        |
| RPL26P32 | 0          | 0        |
| RPL26P33 | 0          | 0        |
| RPL26P34 | 0          | 0        |
| RPL26P35 | 0          | 0        |
| RPL26P36 | 0          | 0        |
| RPL26P37 | 0          | 0        |
| RPL26P4  | 0          | 0        |
| RPL26P5  | 0          | 0        |
| RPL26P6  | 0          | 0        |
| RPL26P7  | 0          | 0        |
| RPL26P8  | 0          | 0        |
| RPL26P9  | 0          | 0        |
| RPL27    | 132.608249 | 119.0395 |
| RPL27A   | 19.0257914 | 17.89303 |
| RPL27AP  | 0          | 0        |
| RPL27AP2 | 0          | 0        |
| RPL27AP3 | 0          | 0        |
| RPL27AP4 | 0          | 0        |
| RPL27AP5 | 0          | 0        |

|          |            |          |
|----------|------------|----------|
| RPL27AP6 | 0          | 0        |
| RPL27AP7 | 0          | 0        |
| RPL27AP8 | 0          | 0        |
| RPL27P1  | 0          | 0        |
| RPL27P10 | 0          | 0        |
| RPL27P11 | 0          | 0        |
| RPL27P12 | 0          | 0        |
| RPL27P2  | 0          | 0        |
| RPL27P3  | 0          | 0        |
| RPL27P4  | 0          | 0        |
| RPL27P5  | 0          | 0        |
| RPL27P6  | 0          | 0        |
| RPL27P7  | 0          | 0        |
| RPL27P8  | 0          | 0        |
| RPL27P9  | 0          | 0        |
| RPL28    | 20.7982493 | 21.42059 |
| RPL28P1  | 0          | 0        |
| RPL28P2  | 0          | 0        |
| RPL28P3  | 0          | 0        |
| RPL28P4  | 0          | 0        |
| RPL28P5  | 0          | 0        |
| RPL29    | 60.2927836 | 59.04262 |
| RPL29P1  | 0          | 0        |
| RPL29P10 | 0          | 0        |
| RPL29P11 | 0          | 0        |
| RPL29P12 | 0          | 0        |
| RPL29P13 | 0          | 0        |
| RPL29P14 | 0          | 0        |
| RPL29P15 | 0          | 0        |
| RPL29P16 | 0          | 0        |
| RPL29P17 | 0          | 0        |
| RPL29P18 | 0          | 0        |
| RPL29P19 | 0          | 0        |
| RPL29P2  | 0          | 0        |
| RPL29P20 | 0          | 0        |
| RPL29P21 | 0          | 0        |
| RPL29P22 | 0          | 0        |
| RPL29P23 | 0          | 0        |
| RPL29P24 | 0          | 0        |
| RPL29P25 | 0          | 0        |
| RPL29P26 | 0          | 0        |
| RPL29P27 | 0          | 0        |
| RPL29P28 | 0          | 0        |
| RPL29P29 | 0          | 0        |
| RPL29P3  | 0          | 0        |
| RPL29P30 | 0          | 0        |
| RPL29P31 | 0          | 0        |

|          |            |          |
|----------|------------|----------|
| RPL29P32 | 0          | 0        |
| RPL29P33 | 0          | 0        |
| RPL29P4  | 0          | 0        |
| RPL29P5  | 0          | 0        |
| RPL29P6  | 0          | 0        |
| RPL29P7  | 0          | 0        |
| RPL29P8  | 0          | 0        |
| RPL29P9  | 0          | 0        |
| RPL3     | 73.7143704 | 74.86857 |
| RPL30    | 256.009426 | 238.1416 |
| RPL30P1  | 0          | 0        |
| RPL30P10 | 0          | 0        |
| RPL30P11 | 0          | 0        |
| RPL30P12 | 0          | 0        |
| RPL30P13 | 0          | 0        |
| RPL30P14 | 0          | 0        |
| RPL30P15 | 0          | 0        |
| RPL30P2  | 0          | 0        |
| RPL30P3  | 0          | 0        |
| RPL30P4  | 0          | 0        |
| RPL30P5  | 0          | 0        |
| RPL30P6  | 0          | 0        |
| RPL30P7  | 0          | 0        |
| RPL30P8  | 0          | 0        |
| RPL30P9  | 0          | 0        |
| RPL31    | 36.371977  | 31.52963 |
| RPL31P1  | 0          | 0        |
| RPL31P10 | 0          | 0        |
| RPL31P11 | 0          | 0        |
| RPL31P12 | 0          | 0        |
| RPL31P13 | 0          | 0        |
| RPL31P14 | 0          | 0        |
| RPL31P15 | 0          | 0        |
| RPL31P16 | 0          | 0        |
| RPL31P17 | 0          | 0        |
| RPL31P18 | 0          | 0        |
| RPL31P19 | 0          | 0        |
| RPL31P2  | 0          | 0        |
| RPL31P20 | 0          | 0        |
| RPL31P21 | 0          | 0        |
| RPL31P22 | 0          | 0        |
| RPL31P23 | 0          | 0        |
| RPL31P24 | 0          | 0        |
| RPL31P25 | 0          | 0        |
| RPL31P26 | 0          | 0        |
| RPL31P27 | 0          | 0        |
| RPL31P28 | 0          | 0        |

|          |            |          |
|----------|------------|----------|
| RPL31P29 | 0          | 0        |
| RPL31P3  | 0          | 0        |
| RPL31P30 | 0          | 0        |
| RPL31P31 | 0          | 0        |
| RPL31P32 | 0          | 0        |
| RPL31P33 | 0          | 0        |
| RPL31P34 | 0          | 0        |
| RPL31P35 | 0          | 0        |
| RPL31P36 | 0          | 0        |
| RPL31P37 | 0          | 0        |
| RPL31P38 | 0          | 0        |
| RPL31P39 | 0          | 0        |
| RPL31P4  | 0          | 0        |
| RPL31P40 | 0          | 0        |
| RPL31P41 | 0          | 0        |
| RPL31P42 | 0          | 0        |
| RPL31P43 | 0          | 0        |
| RPL31P44 | 0          | 0        |
| RPL31P45 | 0          | 0        |
| RPL31P46 | 0          | 0        |
| RPL31P47 | 0          | 0        |
| RPL31P48 | 0          | 0        |
| RPL31P49 | 0          | 0        |
| RPL31P5  | 0          | 0        |
| RPL31P50 | 0          | 0        |
| RPL31P51 | 0          | 0        |
| RPL31P52 | 0          | 0        |
| RPL31P53 | 0          | 0        |
| RPL31P54 | 0          | 0        |
| RPL31P55 | 0          | 0        |
| RPL31P56 | 0          | 0        |
| RPL31P57 | 0          | 0        |
| RPL31P58 | 0          | 0        |
| RPL31P59 | 0          | 0        |
| RPL31P6  | 0          | 0        |
| RPL31P60 | 0          | 0        |
| RPL31P61 | 0          | 0        |
| RPL31P62 | 0          | 0        |
| RPL31P63 | 0          | 0        |
| RPL31P7  | 0          | 0        |
| RPL31P8  | 0          | 0        |
| RPL31P9  | 0          | 0        |
| RPL32    | 38.4314549 | 34.65204 |
| RPL32P1  | 0          | 0        |
| RPL32P10 | 0          | 0        |
| RPL32P11 | 0          | 0        |
| RPL32P12 | 0          | 0        |

|          |            |          |
|----------|------------|----------|
| RPL32P13 | 0          | 0        |
| RPL32P14 | 0          | 0        |
| RPL32P15 | 0          | 0        |
| RPL32P16 | 0          | 0        |
| RPL32P17 | 0          | 0        |
| RPL32P18 | 0          | 0        |
| RPL32P19 | 0          | 0        |
| RPL32P2  | 0          | 0        |
| RPL32P20 | 0          | 0        |
| RPL32P21 | 0          | 0        |
| RPL32P22 | 0          | 0        |
| RPL32P23 | 0          | 0        |
| RPL32P24 | 0          | 0        |
| RPL32P25 | 0          | 0        |
| RPL32P26 | 0          | 0        |
| RPL32P27 | 0          | 0        |
| RPL32P28 | 0          | 0        |
| RPL32P29 | 0          | 0        |
| RPL32P3  | 0          | 0        |
| RPL32P30 | 0          | 0        |
| RPL32P31 | 0          | 0        |
| RPL32P32 | 0          | 0        |
| RPL32P33 | 0          | 0        |
| RPL32P34 | 0          | 0        |
| RPL32P35 | 0          | 0        |
| RPL32P36 | 0          | 0        |
| RPL32P4  | 0          | 0        |
| RPL32P5  | 0          | 0        |
| RPL32P6  | 0          | 0        |
| RPL32P7  | 0          | 0        |
| RPL32P8  | 0          | 0        |
| RPL32P9  | 0          | 0        |
| RPL34    | 67.6332075 | 62.68959 |
| RPL34P1  | 0          | 0        |
| RPL34P10 | 0          | 0        |
| RPL34P11 | 0          | 0        |
| RPL34P12 | 0          | 0        |
| RPL34P13 | 0          | 0        |
| RPL34P14 | 0          | 0        |
| RPL34P15 | 0          | 0        |
| RPL34P16 | 0          | 0        |
| RPL34P17 | 0          | 0        |
| RPL34P18 | 0          | 0        |
| RPL34P19 | 0          | 0        |
| RPL34P2  | 0          | 0        |
| RPL34P20 | 0          | 0        |
| RPL34P21 | 0          | 0        |

|           |            |          |
|-----------|------------|----------|
| RPL34P22  | 0          | 0        |
| RPL34P23  | 0          | 0        |
| RPL34P24  | 0          | 0        |
| RPL34P25  | 0          | 0        |
| RPL34P26  | 0          | 0        |
| RPL34P27  | 0          | 0        |
| RPL34P28  | 0          | 0        |
| RPL34P29  | 0          | 0        |
| RPL34P3   | 0          | 0        |
| RPL34P30  | 0          | 0        |
| RPL34P31  | 0          | 0        |
| RPL34P32  | 0          | 0        |
| RPL34P33  | 0          | 0        |
| RPL34P34  | 0          | 0        |
| RPL34P35  | 0          | 0        |
| RPL34P4   | 0          | 0        |
| RPL34P5   | 0          | 0        |
| RPL34P6   | 0          | 0        |
| RPL34P7   | 0          | 0        |
| RPL34P8   | 0          | 0        |
| RPL34P9   | 0          | 0        |
| RPL35     | 57.225466  | 54.62421 |
| RPL35A    | 118.506411 | 115.2802 |
| RPL35AP   | 0          | 0        |
| RPL35AP10 | 0          | 0        |
| RPL35AP11 | 0          | 0        |
| RPL35AP12 | 0          | 0        |
| RPL35AP13 | 0          | 0        |
| RPL35AP14 | 0          | 0        |
| RPL35AP15 | 0          | 0        |
| RPL35AP16 | 0          | 0        |
| RPL35AP17 | 0          | 0        |
| RPL35AP18 | 0          | 0        |
| RPL35AP19 | 0          | 0        |
| RPL35AP2  | 0          | 0        |
| RPL35AP20 | 0          | 0        |
| RPL35AP21 | 0          | 0        |
| RPL35AP22 | 0          | 0        |
| RPL35AP23 | 0          | 0        |
| RPL35AP24 | 0          | 0        |
| RPL35AP25 | 0          | 0        |
| RPL35AP26 | 0          | 0        |
| RPL35AP27 | 0          | 0        |
| RPL35AP28 | 0          | 0        |
| RPL35AP29 | 0          | 0        |
| RPL35AP3  | 0          | 0        |
| RPL35AP30 | 0          | 0        |



|              |            |          |
|--------------|------------|----------|
| RPL35AP31    | 0          | 0        |
| RPL35AP32    | 0          | 0        |
| RPL35AP33    | 0          | 0        |
| RPL35AP34    | 0          | 0        |
| RPL35AP35    | 0          | 0        |
| RPL35AP36    | 0          | 0        |
| RPL35AP37    | 0          | 0        |
| RPL35AP4     | 0          | 0        |
| RPL35AP5     | 0          | 0        |
| RPL35AP6     | 0          | 0        |
| RPL35AP7     | 0          | 0        |
| RPL35AP8     | 0          | 0        |
| RPL35AP9     | 0          | 0        |
| RPL35P1      | 0          | 0        |
| RPL35P2      | 0          | 0        |
| RPL35P3      | 0          | 0        |
| RPL35P4      | 0          | 0        |
| RPL35P5      | 0          | 0        |
| RPL35P6      | 0          | 0        |
| RPL35P7      | 0          | 0        |
| RPL35P8      | 0          | 0        |
| RPL36        | 48.6297804 | 51.3688  |
| RPL36_7_1657 | 0          | 0        |
| RPL36A       | 19.9089417 | 17.06834 |
| RPL36AL      | 138.413412 | 123.3074 |
| RPL36AP1     | 0          | 0        |
| RPL36AP10    | 0          | 0        |
| RPL36AP11    | 0          | 0        |
| RPL36AP12    | 0          | 0        |
| RPL36AP13    | 0          | 0        |
| RPL36AP14    | 0          | 0        |
| RPL36AP15    | 0          | 0        |
| RPL36AP16    | 0          | 0        |
| RPL36AP17    | 0          | 0        |
| RPL36AP18    | 0          | 0        |
| RPL36AP19    | 0          | 0        |
| RPL36AP2     | 0          | 0        |
| RPL36AP20    | 0          | 0        |
| RPL36AP21    | 0          | 0        |
| RPL36AP23    | 0          | 0        |
| RPL36AP24    | 0          | 0        |
| RPL36AP25    | 0          | 0        |
| RPL36AP26    | 0          | 0        |
| RPL36AP27    | 0          | 0        |
| RPL36AP28    | 0          | 0        |
| RPL36AP29    | 0          | 0        |
| RPL36AP30    | 0          | 0        |

|           |   |   |
|-----------|---|---|
| RPL36AP31 | 0 | 0 |
| RPL36AP32 | 0 | 0 |
| RPL36AP33 | 0 | 0 |
| RPL36AP34 | 0 | 0 |
| RPL36AP35 | 0 | 0 |
| RPL36AP36 | 0 | 0 |
| RPL36AP37 | 0 | 0 |
| RPL36AP38 | 0 | 0 |
| RPL36AP39 | 0 | 0 |
| RPL36AP4  | 0 | 0 |
| RPL36AP40 | 0 | 0 |
| RPL36AP41 | 0 | 0 |
| RPL36AP42 | 0 | 0 |
| RPL36AP43 | 0 | 0 |
| RPL36AP44 | 0 | 0 |
| RPL36AP45 | 0 | 0 |
| RPL36AP46 | 0 | 0 |
| RPL36AP47 | 0 | 0 |
| RPL36AP48 | 0 | 0 |
| RPL36AP49 | 0 | 0 |
| RPL36AP5  | 0 | 0 |
| RPL36AP50 | 0 | 0 |
| RPL36AP51 | 0 | 0 |
| RPL36AP52 | 0 | 0 |
| RPL36AP53 | 0 | 0 |
| RPL36AP54 | 0 | 0 |
| RPL36AP6  | 0 | 0 |
| RPL36AP7  | 0 | 0 |
| RPL36AP8  | 0 | 0 |
| RPL36AP9  | 0 | 0 |
| RPL36P1   | 0 | 0 |
| RPL36P10  | 0 | 0 |
| RPL36P11  | 0 | 0 |
| RPL36P12  | 0 | 0 |
| RPL36P13  | 0 | 0 |
| RPL36P14  | 0 | 0 |
| RPL36P15  | 0 | 0 |
| RPL36P17  | 0 | 0 |
| RPL36P18  | 0 | 0 |
| RPL36P2   | 0 | 0 |
| RPL36P3   | 0 | 0 |
| RPL36P4   | 0 | 0 |
| RPL36P5   | 0 | 0 |
| RPL36P6   | 0 | 0 |
| RPL36P7   | 0 | 0 |
| RPL36P8   | 0 | 0 |
| RPL36P9   | 0 | 0 |

|          |            |          |
|----------|------------|----------|
| RPL37    | 56.5675146 | 52.86672 |
| RPL37A   | 145.224965 | 131.5387 |
| RPL37AP1 | 0          | 0        |
| RPL37AP2 | 0          | 0        |
| RPL37AP3 | 0          | 0        |
| RPL37AP4 | 0          | 0        |
| RPL37AP5 | 0          | 0        |
| RPL37AP6 | 0          | 0        |
| RPL37AP7 | 0          | 0        |
| RPL37AP8 | 0          | 0        |
| RPL37AP9 | 0          | 0        |
| RPL37P1  | 0          | 0        |
| RPL37P10 | 0          | 0        |
| RPL37P11 | 0          | 0        |
| RPL37P12 | 0          | 0        |
| RPL37P13 | 0          | 0        |
| RPL37P14 | 0          | 0        |
| RPL37P15 | 0          | 0        |
| RPL37P16 | 0          | 0        |
| RPL37P17 | 0          | 0        |
| RPL37P18 | 0          | 0        |
| RPL37P19 | 0          | 0        |
| RPL37P2  | 0          | 0        |
| RPL37P20 | 0          | 0        |
| RPL37P21 | 0          | 0        |
| RPL37P22 | 0          | 0        |
| RPL37P23 | 0          | 0        |
| RPL37P24 | 0          | 0        |
| RPL37P3  | 0          | 0        |
| RPL37P4  | 0          | 0        |
| RPL37P5  | 0          | 0        |
| RPL37P6  | 0          | 0        |
| RPL37P7  | 0          | 0        |
| RPL37P8  | 0          | 0        |
| RPL37P9  | 0          | 0        |
| RPL38    | 111.241164 | 107.3611 |
| RPL38P1  | 0          | 0        |
| RPL38P2  | 0          | 0        |
| RPL38P3  | 0          | 0        |
| RPL39    | 209.257097 | 187.3879 |
| RPL39L   | 0.35889612 | 0.407712 |
| RPL39P   | 0          | 0        |
| RPL39P10 | 0          | 0        |
| RPL39P11 | 0          | 0        |
| RPL39P12 | 0          | 0        |
| RPL39P13 | 0          | 0        |
| RPL39P14 | 0          | 0        |

|          |   |          |
|----------|---|----------|
| RPL39P15 | 0 | 0        |
| RPL39P16 | 0 | 0        |
| RPL39P17 | 0 | 0        |
| RPL39P18 | 0 | 0        |
| RPL39P19 | 0 | 0        |
| RPL39P2  | 0 | 0        |
| RPL39P20 | 0 | 0        |
| RPL39P21 | 0 | 0        |
| RPL39P22 | 0 | 0        |
| RPL39P23 | 0 | 0        |
| RPL39P24 | 0 | 0        |
| RPL39P25 | 0 | 0        |
| RPL39P26 | 0 | 0        |
| RPL39P27 | 0 | 0        |
| RPL39P28 | 0 | 0        |
| RPL39P29 | 0 | 0        |
| RPL39P3  | 0 | 0        |
| RPL39P30 | 0 | 0        |
| RPL39P31 | 0 | 0        |
| RPL39P32 | 0 | 0        |
| RPL39P33 | 0 | 0        |
| RPL39P34 | 0 | 0        |
| RPL39P35 | 0 | 0        |
| RPL39P36 | 0 | 0        |
| RPL39P37 | 0 | 0        |
| RPL39P38 | 0 | 0        |
| RPL39P39 | 0 | 0        |
| RPL39P4  | 0 | 0        |
| RPL39P40 | 0 | 0        |
| RPL39P41 | 0 | 0        |
| RPL39P42 | 0 | 0        |
| RPL39P5  | 0 | 0        |
| RPL39P6  | 0 | 0        |
| RPL39P7  | 0 | 0        |
| RPL39P8  | 0 | 0        |
| RPL39P9  | 0 | 0        |
| RPL3L    | 0 | 0.031243 |
| RPL3P1   | 0 | 0        |
| RPL3P10  | 0 | 0        |
| RPL3P11  | 0 | 0        |
| RPL3P12  | 0 | 0        |
| RPL3P2   | 0 | 0        |
| RPL3P3   | 0 | 0        |
| RPL3P4   | 0 | 0        |
| RPL3P5   | 0 | 0        |
| RPL3P6   | 0 | 0        |
| RPL3P7   | 0 | 0        |

|         |            |          |
|---------|------------|----------|
| RPL3P8  | 0          | 0        |
| RPL3P9  | 0          | 0        |
| RPL4    | 70.5493822 | 63.79926 |
| RPL41   | 220.441955 | 198.5245 |
| RPL41P1 | 0          | 0        |
| RPL41P2 | 0          | 0        |
| RPL41P3 | 0          | 0        |
| RPL41P4 | 0          | 0        |
| RPL41P5 | 0          | 0        |
| RPL41P6 | 0          | 0        |
| RPL41P7 | 0          | 0        |
| RPL4P1  | 0          | 0        |
| RPL4P2  | 0          | 0        |
| RPL4P3  | 0          | 0        |
| RPL4P4  | 0          | 0        |
| RPL4P5  | 0          | 0        |
| RPL4P6  | 0          | 0        |
| RPL5    | 49.2494416 | 59.58536 |
| RPL5P1  | 0          | 0        |
| RPL5P10 | 0          | 0        |
| RPL5P11 | 0          | 0        |
| RPL5P12 | 0          | 0        |
| RPL5P13 | 0          | 0        |
| RPL5P14 | 0          | 0        |
| RPL5P15 | 0          | 0        |
| RPL5P16 | 0          | 0        |
| RPL5P17 | 0          | 0        |
| RPL5P18 | 0          | 0        |
| RPL5P19 | 0          | 0        |
| RPL5P2  | 0          | 0        |
| RPL5P20 | 0          | 0        |
| RPL5P21 | 0          | 0        |
| RPL5P22 | 0          | 0        |
| RPL5P23 | 0          | 0        |
| RPL5P24 | 0          | 0        |
| RPL5P25 | 0          | 0        |
| RPL5P26 | 0          | 0        |
| RPL5P27 | 0          | 0        |
| RPL5P28 | 0          | 0        |
| RPL5P29 | 0          | 0        |
| RPL5P3  | 0          | 0        |
| RPL5P30 | 0          | 0        |
| RPL5P31 | 0          | 0        |
| RPL5P32 | 0          | 0        |
| RPL5P33 | 0          | 0        |
| RPL5P34 | 0          | 0        |
| RPL5P35 | 0          | 0        |

|          |            |          |
|----------|------------|----------|
| RPL5P4   | 0          | 0        |
| RPL5P5   | 0          | 0        |
| RPL5P6   | 0          | 0        |
| RPL5P7   | 0          | 0        |
| RPL5P8   | 0          | 0        |
| RPL5P9   | 0          | 0        |
| RPL6     | 79.7846187 | 74.27635 |
| RPL6P1   | 0          | 0        |
| RPL6P10  | 0          | 0        |
| RPL6P11  | 0          | 0        |
| RPL6P12  | 0          | 0        |
| RPL6P13  | 0          | 0        |
| RPL6P14  | 0          | 0        |
| RPL6P15  | 0          | 0        |
| RPL6P16  | 0          | 0        |
| RPL6P17  | 0          | 0        |
| RPL6P18  | 0          | 0        |
| RPL6P19  | 0          | 0        |
| RPL6P2   | 0          | 0        |
| RPL6P20  | 0          | 0        |
| RPL6P21  | 0          | 0        |
| RPL6P22  | 0          | 0        |
| RPL6P23  | 0          | 0        |
| RPL6P24  | 0          | 0        |
| RPL6P25  | 0          | 0        |
| RPL6P26  | 0          | 0        |
| RPL6P27  | 0          | 0        |
| RPL6P28  | 0          | 0        |
| RPL6P29  | 0          | 0        |
| RPL6P3   | 0          | 0        |
| RPL6P30  | 0          | 0        |
| RPL6P4   | 0          | 0        |
| RPL6P5   | 0          | 0        |
| RPL6P6   | 0          | 0        |
| RPL6P7   | 0          | 0        |
| RPL6P8   | 0          | 0        |
| RPL6P9   | 0          | 0        |
| RPL7     | 35.293417  | 31.4473  |
| RPL7A    | 61.4931871 | 57.51212 |
| RPL7AP10 | 0          | 0        |
| RPL7AP11 | 0          | 0        |
| RPL7AP12 | 0          | 0        |
| RPL7AP13 | 0          | 0        |
| RPL7AP14 | 0          | 0        |
| RPL7AP15 | 0          | 0        |
| RPL7AP16 | 0          | 0        |
| RPL7AP17 | 0          | 0        |

|          |   |   |
|----------|---|---|
| RPL7AP18 | 0 | 0 |
| RPL7AP19 | 0 | 0 |
| RPL7AP2  | 0 | 0 |
| RPL7AP20 | 0 | 0 |
| RPL7AP21 | 0 | 0 |
| RPL7AP22 | 0 | 0 |
| RPL7AP23 | 0 | 0 |
| RPL7AP24 | 0 | 0 |
| RPL7AP25 | 0 | 0 |
| RPL7AP26 | 0 | 0 |
| RPL7AP27 | 0 | 0 |
| RPL7AP28 | 0 | 0 |
| RPL7AP29 | 0 | 0 |
| RPL7AP3  | 0 | 0 |
| RPL7AP30 | 0 | 0 |
| RPL7AP31 | 0 | 0 |
| RPL7AP32 | 0 | 0 |
| RPL7AP33 | 0 | 0 |
| RPL7AP34 | 0 | 0 |
| RPL7AP35 | 0 | 0 |
| RPL7AP36 | 0 | 0 |
| RPL7AP37 | 0 | 0 |
| RPL7AP38 | 0 | 0 |
| RPL7AP39 | 0 | 0 |
| RPL7AP4  | 0 | 0 |
| RPL7AP40 | 0 | 0 |
| RPL7AP41 | 0 | 0 |
| RPL7AP42 | 0 | 0 |
| RPL7AP43 | 0 | 0 |
| RPL7AP44 | 0 | 0 |
| RPL7AP45 | 0 | 0 |
| RPL7AP46 | 0 | 0 |
| RPL7AP47 | 0 | 0 |
| RPL7AP48 | 0 | 0 |
| RPL7AP49 | 0 | 0 |
| RPL7AP5  | 0 | 0 |
| RPL7AP50 | 0 | 0 |
| RPL7AP51 | 0 | 0 |
| RPL7AP52 | 0 | 0 |
| RPL7AP53 | 0 | 0 |
| RPL7AP54 | 0 | 0 |
| RPL7AP55 | 0 | 0 |
| RPL7AP56 | 0 | 0 |
| RPL7AP57 | 0 | 0 |
| RPL7AP58 | 0 | 0 |
| RPL7AP59 | 0 | 0 |
| RPL7AP6  | 0 | 0 |

|          |            |          |
|----------|------------|----------|
| RPL7AP60 | 0          | 0        |
| RPL7AP61 | 0          | 0        |
| RPL7AP62 | 0          | 0        |
| RPL7AP63 | 0          | 0        |
| RPL7AP64 | 0          | 0        |
| RPL7AP65 | 0          | 0        |
| RPL7AP66 | 0          | 0        |
| RPL7AP67 | 0          | 0        |
| RPL7AP68 | 0          | 0        |
| RPL7AP69 | 0          | 0        |
| RPL7AP7  | 0          | 0        |
| RPL7AP70 | 0          | 0        |
| RPL7AP71 | 0          | 0        |
| RPL7AP72 | 0          | 0        |
| RPL7AP8  | 0          | 0        |
| RPL7L1   | 7.48666687 | 7.249833 |
| RPL7P    | 0          | 0        |
| RPL7P10  | 0          | 0        |
| RPL7P11  | 0          | 0        |
| RPL7P12  | 0          | 0        |
| RPL7P13  | 0          | 0        |
| RPL7P14  | 0          | 0        |
| RPL7P15  | 0          | 0        |
| RPL7P16  | 0          | 0        |
| RPL7P17  | 0          | 0        |
| RPL7P18  | 0          | 0        |
| RPL7P19  | 0          | 0        |
| RPL7P2   | 0          | 0        |
| RPL7P20  | 0          | 0        |
| RPL7P21  | 0          | 0        |
| RPL7P22  | 0          | 0        |
| RPL7P23  | 0          | 0        |
| RPL7P24  | 0          | 0        |
| RPL7P25  | 0          | 0        |
| RPL7P26  | 0          | 0        |
| RPL7P27  | 0          | 0        |
| RPL7P28  | 0          | 0        |
| RPL7P29  | 0          | 0        |
| RPL7P3   | 0          | 0        |
| RPL7P30  | 0          | 0        |
| RPL7P31  | 0          | 0        |
| RPL7P32  | 0          | 0        |
| RPL7P33  | 0          | 0        |
| RPL7P34  | 0          | 0        |
| RPL7P35  | 0          | 0        |
| RPL7P36  | 0          | 0        |
| RPL7P37  | 0          | 0        |



|         |            |          |
|---------|------------|----------|
| RPL7P38 | 0          | 0        |
| RPL7P39 | 0          | 0        |
| RPL7P4  | 0          | 0        |
| RPL7P40 | 0          | 0        |
| RPL7P41 | 0          | 0        |
| RPL7P42 | 0          | 0        |
| RPL7P43 | 0          | 0        |
| RPL7P44 | 0          | 0        |
| RPL7P45 | 0          | 0        |
| RPL7P46 | 0          | 0        |
| RPL7P47 | 0          | 0        |
| RPL7P48 | 0          | 0        |
| RPL7P49 | 0          | 0        |
| RPL7P5  | 0          | 0        |
| RPL7P50 | 0          | 0        |
| RPL7P51 | 0          | 0        |
| RPL7P52 | 0          | 0        |
| RPL7P53 | 0          | 0        |
| RPL7P54 | 0          | 0        |
| RPL7P55 | 0          | 0        |
| RPL7P56 | 0          | 0        |
| RPL7P57 | 0          | 0        |
| RPL7P58 | 0          | 0        |
| RPL7P6  | 0          | 0        |
| RPL7P7  | 0          | 0        |
| RPL7P8  | 0          | 0        |
| RPL7P9  | 0          | 0        |
| RPL8    | 159.102453 | 158.7931 |
| RPL8P1  | 0          | 0        |
| RPL8P2  | 0          | 0        |
| RPL8P3  | 0          | 0        |
| RPL8P4  | 0          | 0        |
| RPL8P5  | 0          | 0        |
| RPL9    | 76.2724938 | 69.97778 |
| RPL9P1  | 0          | 0        |
| RPL9P10 | 0          | 0        |
| RPL9P11 | 0          | 0        |
| RPL9P12 | 0          | 0        |
| RPL9P13 | 0          | 0        |
| RPL9P14 | 0          | 0        |
| RPL9P15 | 0          | 0        |
| RPL9P16 | 0          | 0        |
| RPL9P17 | 0          | 0        |
| RPL9P18 | 0          | 0        |
| RPL9P19 | 0          | 0        |
| RPL9P2  | 0          | 0        |
| RPL9P20 | 0          | 0        |

|          |            |          |
|----------|------------|----------|
| RPL9P21  | 0          | 0        |
| RPL9P22  | 0          | 0        |
| RPL9P23  | 0          | 0        |
| RPL9P24  | 0          | 0        |
| RPL9P25  | 0          | 0        |
| RPL9P26  | 0          | 0        |
| RPL9P27  | 0          | 0        |
| RPL9P28  | 0          | 0        |
| RPL9P29  | 0          | 0        |
| RPL9P3   | 0          | 0        |
| RPL9P30  | 0          | 0        |
| RPL9P31  | 0          | 0        |
| RPL9P32  | 0          | 0        |
| RPL9P33  | 0          | 0        |
| RPL9P4   | 0          | 0        |
| RPL9P5   | 0          | 0        |
| RPL9P6   | 0          | 0        |
| RPL9P7   | 0          | 0        |
| RPL9P8   | 0          | 0        |
| RPL9P9   | 0          | 0        |
| RPLP0    | 21.956833  | 19.42555 |
| RPLPOP1  | 0          | 0        |
| RPLPOP10 | 0          | 0        |
| RPLPOP11 | 0          | 0        |
| RPLPOP2  | 0          | 0        |
| RPLPOP3  | 0          | 0        |
| RPLPOP4  | 0          | 0        |
| RPLPOP5  | 0          | 0        |
| RPLPOP6  | 0          | 0        |
| RPLPOP7  | 0          | 0        |
| RPLPOP8  | 0          | 0        |
| RPLPOP9  | 0          | 0        |
| RPLP1    | 424.736324 | 397.0899 |
| RPLP1P1  | 0          | 0        |
| RPLP1P10 | 0          | 0        |
| RPLP1P11 | 0          | 0        |
| RPLP1P12 | 0          | 0        |
| RPLP1P2  | 0          | 0        |
| RPLP1P3  | 0          | 0        |
| RPLP1P4  | 0          | 0        |
| RPLP1P5  | 0          | 0        |
| RPLP1P6  | 0          | 0        |
| RPLP1P7  | 0          | 0        |
| RPLP1P8  | 0          | 0        |
| RPLP1P9  | 0          | 0        |
| RPLP2    | 186.711763 | 190.0635 |
| RPLP2P1  | 0          | 0        |

|          |            |          |
|----------|------------|----------|
| RPLP2P2  | 0          | 0        |
| RPLP2P3  | 0          | 0        |
| RPLP2P4  | 0          | 0        |
| RPLP2P5  | 0          | 0        |
| RPN1     | 58.6302266 | 57.92216 |
| RPN2     | 33.3888178 | 32.09912 |
| RPP14    | 3.98880565 | 3.528172 |
| RPP21    | 15.7085806 | 17.25036 |
| RPP25    | 0.18024287 | 0.184283 |
| RPP30    | 1.46241083 | 1.331531 |
| RPP38    | 3.18681043 | 2.740441 |
| RPP40    | 0.0725637  | 0        |
| RPPH1    | 0          | 0        |
| RPRD1A   | 2.87201686 | 2.624676 |
| RPRD1B   | 10.1379889 | 9.061783 |
| RPRD2    | 6.35680808 | 6.573827 |
| RPRM     | 0.07146611 | 0.016237 |
| RPRML    | 0.0384727  | 0.043706 |
| RPS10    | 59.5717711 | 54.84299 |
| RPS10P1  | 0          | 0        |
| RPS10P10 | 0          | 0        |
| RPS10P11 | 0          | 0        |
| RPS10P12 | 0          | 0        |
| RPS10P13 | 0          | 0        |
| RPS10P14 | 0          | 0        |
| RPS10P15 | 0          | 0        |
| RPS10P16 | 0          | 0        |
| RPS10P17 | 0          | 0        |
| RPS10P18 | 0          | 0        |
| RPS10P19 | 0          | 0        |
| RPS10P2  | 0          | 0        |
| RPS10P20 | 0          | 0        |
| RPS10P21 | 0          | 0        |
| RPS10P22 | 0          | 0        |
| RPS10P23 | 0          | 0        |
| RPS10P24 | 0          | 0        |
| RPS10P25 | 0          | 0        |
| RPS10P26 | 0          | 0        |
| RPS10P27 | 0          | 0        |
| RPS10P28 | 0          | 0        |
| RPS10P29 | 0          | 0        |
| RPS10P3  | 0          | 0        |
| RPS10P30 | 0          | 0        |
| RPS10P31 | 0          | 0        |
| RPS10P4  | 0          | 0        |
| RPS10P5  | 0          | 0        |
| RPS10P6  | 0          | 0        |

|          |            |          |
|----------|------------|----------|
| RPS10P7  | 0          | 0        |
| RPS10P8  | 0          | 0        |
| RPS10P9  | 0          | 0        |
| RPS11    | 346.624504 | 347.4126 |
| RPS11P1  | 0          | 0        |
| RPS11P2  | 0          | 0        |
| RPS11P3  | 0          | 0        |
| RPS11P4  | 0          | 0        |
| RPS11P5  | 0          | 0        |
| RPS11P6  | 0          | 0        |
| RPS11P7  | 0          | 0        |
| RPS12    | 100.44507  | 92.31144 |
| RPS12P1  | 0          | 0        |
| RPS12P10 | 0          | 0        |
| RPS12P11 | 0          | 0        |
| RPS12P12 | 0          | 0        |
| RPS12P13 | 0          | 0        |
| RPS12P14 | 0          | 0        |
| RPS12P15 | 0          | 0        |
| RPS12P16 | 0          | 0        |
| RPS12P17 | 0          | 0        |
| RPS12P18 | 0          | 0        |
| RPS12P19 | 0          | 0        |
| RPS12P2  | 0          | 0        |
| RPS12P20 | 0          | 0        |
| RPS12P21 | 0          | 0        |
| RPS12P22 | 0          | 0        |
| RPS12P23 | 0          | 0        |
| RPS12P24 | 0          | 0        |
| RPS12P25 | 0          | 0        |
| RPS12P26 | 0          | 0        |
| RPS12P27 | 0          | 0        |
| RPS12P28 | 0          | 0        |
| RPS12P29 | 0          | 0        |
| RPS12P3  | 0          | 0        |
| RPS12P30 | 0          | 0        |
| RPS12P31 | 0          | 0        |
| RPS12P32 | 0          | 0        |
| RPS12P4  | 0          | 0        |
| RPS12P5  | 0          | 0        |
| RPS12P6  | 0          | 0        |
| RPS12P7  | 0          | 0        |
| RPS12P8  | 0          | 0        |
| RPS12P9  | 0          | 0        |
| RPS13    | 62.0426118 | 57.65838 |
| RPS13P1  | 0          | 0        |
| RPS13P2  | 0          | 0        |

|           |            |          |
|-----------|------------|----------|
| RPS13P3   | 0          | 0        |
| RPS13P4   | 0          | 0        |
| RPS13P5   | 0          | 0        |
| RPS13P6   | 0          | 0        |
| RPS13P7   | 0          | 0        |
| RPS13P8   | 0          | 0        |
| RPS14     | 75.5146429 | 69.89281 |
| RPS14P1   | 0          | 0        |
| RPS14P10  | 0          | 0        |
| RPS14P2   | 0          | 0        |
| RPS14P3   | 0          | 0        |
| RPS14P4   | 0          | 0        |
| RPS14P5   | 0          | 0        |
| RPS14P6   | 0          | 0        |
| RPS14P7   | 0          | 0        |
| RPS14P8   | 0          | 0        |
| RPS14P9   | 0          | 0        |
| RPS15     | 104.849485 | 109.5746 |
| RPS15A    | 122.512242 | 109.5724 |
| RPS15AP1  | 0          | 0        |
| RPS15AP10 | 0          | 0        |
| RPS15AP11 | 0          | 0        |
| RPS15AP12 | 0          | 0        |
| RPS15AP13 | 0          | 0        |
| RPS15AP14 | 0          | 0        |
| RPS15AP15 | 0          | 0        |
| RPS15AP16 | 0          | 0        |
| RPS15AP17 | 0          | 0        |
| RPS15AP18 | 0          | 0        |
| RPS15AP19 | 0          | 0        |
| RPS15AP2  | 0          | 0        |
| RPS15AP20 | 0          | 0        |
| RPS15AP21 | 0          | 0        |
| RPS15AP22 | 0          | 0        |
| RPS15AP23 | 0          | 0        |
| RPS15AP24 | 0          | 0        |
| RPS15AP25 | 0          | 0        |
| RPS15AP26 | 0          | 0        |
| RPS15AP27 | 0          | 0        |
| RPS15AP28 | 0          | 0        |
| RPS15AP29 | 0          | 0        |
| RPS15AP3  | 0          | 0        |
| RPS15AP30 | 0          | 0        |
| RPS15AP31 | 0          | 0        |
| RPS15AP32 | 0          | 0        |
| RPS15AP33 | 0          | 0        |
| RPS15AP34 | 0          | 0        |

|           |            |          |
|-----------|------------|----------|
| RPS15AP35 | 0          | 0        |
| RPS15AP36 | 0          | 0        |
| RPS15AP37 | 0          | 0        |
| RPS15AP38 | 0          | 0        |
| RPS15AP39 | 0          | 0        |
| RPS15AP4  | 0          | 0        |
| RPS15AP40 | 0          | 0        |
| RPS15AP5  | 0          | 0        |
| RPS15AP6  | 0          | 0        |
| RPS15AP7  | 0          | 0        |
| RPS15AP8  | 0          | 0        |
| RPS15AP9  | 0          | 0        |
| RPS15P1   | 0          | 0        |
| RPS15P2   | 0          | 0        |
| RPS15P3   | 0          | 0        |
| RPS15P4   | 0          | 0        |
| RPS15P5   | 0          | 0        |
| RPS15P6   | 0          | 0        |
| RPS15P7   | 0          | 0        |
| RPS15P8   | 0          | 0        |
| RPS15P9   | 0          | 0        |
| RPS16     | 60.8665513 | 63.5182  |
| RPS16P1   | 0          | 0        |
| RPS16P10  | 0          | 0        |
| RPS16P2   | 0          | 0        |
| RPS16P3   | 0          | 0        |
| RPS16P4   | 0          | 0        |
| RPS16P5   | 0          | 0        |
| RPS16P6   | 0          | 0        |
| RPS16P7   | 0          | 0        |
| RPS16P8   | 0          | 0        |
| RPS16P9   | 0          | 0        |
| RPS17     | 105.603518 | 94.11226 |
| RPS17P1   | 0          | 0        |
| RPS17P10  | 0          | 0        |
| RPS17P11  | 0          | 0        |
| RPS17P12  | 0          | 0        |
| RPS17P13  | 0          | 0        |
| RPS17P14  | 0          | 0        |
| RPS17P15  | 0          | 0        |
| RPS17P16  | 0          | 0        |
| RPS17P17  | 0          | 0        |
| RPS17P2   | 0          | 0        |
| RPS17P3   | 0          | 0        |
| RPS17P5   | 0          | 0        |
| RPS17P6   | 0          | 0        |
| RPS17P7   | 0          | 0        |

|          |            |          |
|----------|------------|----------|
| RPS17P8  | 0          | 0        |
| RPS17P9  | 0          | 0        |
| RPS18    | 94.8079499 | 87.38777 |
| RPS18P1  | 0          | 0        |
| RPS18P10 | 0          | 0        |
| RPS18P11 | 0          | 0        |
| RPS18P12 | 0          | 0        |
| RPS18P13 | 0          | 0        |
| RPS18P14 | 0          | 0        |
| RPS18P2  | 0          | 0        |
| RPS18P3  | 0          | 0        |
| RPS18P4  | 0          | 0        |
| RPS18P5  | 0          | 0        |
| RPS18P6  | 0          | 0        |
| RPS18P7  | 0          | 0        |
| RPS18P8  | 0          | 0        |
| RPS18P9  | 0          | 0        |
| RPS19    | 29.5444285 | 33.81614 |
| RPS19BP1 | 52.3251764 | 67.4297  |
| RPS19P1  | 0          | 0        |
| RPS19P2  | 0          | 0        |
| RPS19P3  | 0          | 0        |
| RPS19P4  | 0          | 0        |
| RPS19P5  | 0          | 0        |
| RPS19P6  | 0          | 0        |
| RPS19P7  | 0          | 0        |
| RPS2     | 34.2833422 | 36.99403 |
| RPS20    | 160.483979 | 144.3154 |
| RPS20P1  | 0          | 0        |
| RPS20P10 | 0          | 0        |
| RPS20P11 | 0          | 0        |
| RPS20P12 | 0          | 0        |
| RPS20P13 | 0          | 0        |
| RPS20P14 | 0          | 0        |
| RPS20P15 | 0          | 0        |
| RPS20P16 | 0          | 0        |
| RPS20P17 | 0          | 0        |
| RPS20P18 | 0          | 0        |
| RPS20P19 | 0          | 0        |
| RPS20P2  | 0          | 0        |
| RPS20P20 | 0          | 0        |
| RPS20P21 | 0          | 0        |
| RPS20P22 | 0          | 0        |
| RPS20P23 | 0          | 0        |
| RPS20P24 | 0          | 0        |
| RPS20P25 | 0          | 0        |
| RPS20P26 | 0          | 0        |

|          |            |          |
|----------|------------|----------|
| RPS20P27 | 0          | 0        |
| RPS20P28 | 0          | 0        |
| RPS20P29 | 0          | 0        |
| RPS20P3  | 0          | 0        |
| RPS20P30 | 0          | 0        |
| RPS20P31 | 0          | 0        |
| RPS20P32 | 0          | 0        |
| RPS20P33 | 0          | 0        |
| RPS20P34 | 0          | 0        |
| RPS20P35 | 0          | 0        |
| RPS20P4  | 0          | 0        |
| RPS20P5  | 0          | 0        |
| RPS20P6  | 0          | 0        |
| RPS20P7  | 0          | 0        |
| RPS20P8  | 0          | 0        |
| RPS20P9  | 0          | 0        |
| RPS21    | 63.28837   | 59.83341 |
| RPS21P1  | 0          | 0        |
| RPS21P2  | 0          | 0        |
| RPS21P3  | 0          | 0        |
| RPS21P4  | 0          | 0        |
| RPS21P5  | 0          | 0        |
| RPS21P6  | 0          | 0        |
| RPS21P7  | 0          | 0        |
| RPS23    | 13.126557  | 12.15877 |
| RPS23P1  | 0          | 0        |
| RPS23P2  | 0          | 0        |
| RPS23P3  | 0          | 0        |
| RPS23P4  | 0          | 0        |
| RPS23P5  | 0          | 0        |
| RPS23P6  | 0          | 0        |
| RPS23P7  | 0          | 0        |
| RPS23P8  | 0          | 0        |
| RPS24    | 39.9694383 | 36.78791 |
| RPS24P1  | 0          | 0        |
| RPS24P10 | 0          | 0        |
| RPS24P11 | 0          | 0        |
| RPS24P12 | 0          | 0        |
| RPS24P13 | 0          | 0        |
| RPS24P14 | 0          | 0        |
| RPS24P15 | 0          | 0        |
| RPS24P16 | 0          | 0        |
| RPS24P17 | 0          | 0        |
| RPS24P18 | 0          | 0        |
| RPS24P19 | 0          | 0        |
| RPS24P2  | 0          | 0        |
| RPS24P3  | 0          | 0        |



|          |            |          |
|----------|------------|----------|
| RPS24P4  | 0          | 0        |
| RPS24P5  | 0          | 0        |
| RPS24P6  | 0          | 0        |
| RPS24P7  | 0          | 0        |
| RPS24P8  | 0          | 0        |
| RPS24P9  | 0          | 0        |
| RPS25    | 221.193319 | 200.3048 |
| RPS25P1  | 0          | 0        |
| RPS25P10 | 0          | 0        |
| RPS25P2  | 0          | 0        |
| RPS25P3  | 0          | 0        |
| RPS25P4  | 0          | 0        |
| RPS25P5  | 0          | 0        |
| RPS25P6  | 0          | 0        |
| RPS25P7  | 0          | 0        |
| RPS25P8  | 0          | 0        |
| RPS25P9  | 0          | 0        |
| RPS26    | 2.2813409  | 2.836795 |
| RPS26P1  | 0          | 0        |
| RPS26P10 | 0          | 0        |
| RPS26P11 | 0          | 0        |
| RPS26P12 | 0          | 0        |
| RPS26P13 | 0          | 0        |
| RPS26P14 | 0          | 0        |
| RPS26P15 | 0          | 0        |
| RPS26P16 | 0          | 0        |
| RPS26P17 | 0          | 0        |
| RPS26P18 | 0          | 0        |
| RPS26P19 | 0          | 0        |
| RPS26P2  | 0          | 0        |
| RPS26P20 | 0          | 0        |
| RPS26P21 | 0          | 0        |
| RPS26P22 | 0          | 0        |
| RPS26P23 | 0          | 0        |
| RPS26P24 | 0          | 0        |
| RPS26P25 | 0          | 0        |
| RPS26P26 | 0          | 0        |
| RPS26P27 | 0          | 0        |
| RPS26P28 | 0          | 0        |
| RPS26P29 | 0          | 0        |
| RPS26P3  | 0          | 0        |
| RPS26P30 | 0          | 0        |
| RPS26P31 | 0          | 0        |
| RPS26P32 | 0          | 0        |
| RPS26P33 | 0          | 0        |
| RPS26P34 | 0          | 0        |
| RPS26P35 | 0          | 0        |

|           |            |          |
|-----------|------------|----------|
| RPS26P36  | 0          | 0        |
| RPS26P37  | 0          | 0        |
| RPS26P38  | 0          | 0        |
| RPS26P39  | 0          | 0        |
| RPS26P4   | 0          | 0        |
| RPS26P40  | 0          | 0        |
| RPS26P41  | 0          | 0        |
| RPS26P42  | 0          | 0        |
| RPS26P43  | 0          | 0        |
| RPS26P44  | 0          | 0        |
| RPS26P45  | 0          | 0        |
| RPS26P46  | 0          | 0        |
| RPS26P47  | 0          | 0        |
| RPS26P48  | 0          | 0        |
| RPS26P49  | 0          | 0        |
| RPS26P5   | 0          | 0        |
| RPS26P50  | 0          | 0        |
| RPS26P51  | 0          | 0        |
| RPS26P52  | 0          | 0        |
| RPS26P53  | 0          | 0        |
| RPS26P54  | 0          | 0        |
| RPS26P55  | 0          | 0        |
| RPS26P56  | 0          | 0        |
| RPS26P57  | 0          | 0        |
| RPS26P58  | 0          | 0        |
| RPS26P6   | 0          | 0        |
| RPS26P7   | 0          | 0        |
| RPS26P8   | 0          | 0        |
| RPS26P9   | 0          | 0        |
| RPS27     | 209.115186 | 206.5279 |
| RPS27A    | 137.929852 | 124.8872 |
| RPS27AP1  | 0          | 0        |
| RPS27AP10 | 0          | 0        |
| RPS27AP11 | 0          | 0        |
| RPS27AP12 | 0          | 0        |
| RPS27AP13 | 0          | 0        |
| RPS27AP14 | 0          | 0        |
| RPS27AP15 | 0          | 0        |
| RPS27AP16 | 0          | 0        |
| RPS27AP17 | 0          | 0        |
| RPS27AP2  | 0          | 0        |
| RPS27AP3  | 0          | 0        |
| RPS27AP4  | 0          | 0        |
| RPS27AP5  | 0          | 0        |
| RPS27AP6  | 0          | 0        |
| RPS27AP7  | 0          | 0        |
| RPS27AP8  | 0          | 0        |

|          |            |          |
|----------|------------|----------|
| RPS27AP9 | 0          | 0        |
| RPS27L   | 10.2799127 | 10.75271 |
| RPS27P1  | 0          | 0        |
| RPS27P10 | 0          | 0        |
| RPS27P11 | 0          | 0        |
| RPS27P12 | 0          | 0        |
| RPS27P13 | 0          | 0        |
| RPS27P14 | 0          | 0        |
| RPS27P15 | 0          | 0        |
| RPS27P16 | 0          | 0        |
| RPS27P17 | 0          | 0        |
| RPS27P18 | 0          | 0        |
| RPS27P19 | 0          | 0        |
| RPS27P2  | 0          | 0        |
| RPS27P20 | 0          | 0        |
| RPS27P21 | 0          | 0        |
| RPS27P22 | 0          | 0        |
| RPS27P23 | 0          | 0        |
| RPS27P24 | 0          | 0        |
| RPS27P25 | 0          | 0        |
| RPS27P26 | 0          | 0        |
| RPS27P27 | 0          | 0        |
| RPS27P28 | 0          | 0        |
| RPS27P29 | 0          | 0        |
| RPS27P3  | 0          | 0        |
| RPS27P4  | 0          | 0        |
| RPS27P5  | 0          | 0        |
| RPS27P6  | 0          | 0        |
| RPS27P7  | 0          | 0        |
| RPS27P8  | 0          | 0        |
| RPS27P9  | 0          | 0        |
| RPS28    | 17.1725216 | 13.0055  |
| RPS28P1  | 0          | 0        |
| RPS28P2  | 0          | 0        |
| RPS28P3  | 0          | 0        |
| RPS28P4  | 0          | 0        |
| RPS28P5  | 0          | 0        |
| RPS28P6  | 0          | 0        |
| RPS28P7  | 0          | 0        |
| RPS28P8  | 0          | 0        |
| RPS28P9  | 0          | 0        |
| RPS29    | 109.793315 | 100.9571 |
| RPS29P1  | 0          | 0        |
| RPS29P10 | 0          | 0        |
| RPS29P11 | 0          | 0        |
| RPS29P12 | 0          | 0        |
| RPS29P13 | 0          | 0        |

|          |   |   |
|----------|---|---|
| RPS29P14 | 0 | 0 |
| RPS29P15 | 0 | 0 |
| RPS29P16 | 0 | 0 |
| RPS29P17 | 0 | 0 |
| RPS29P18 | 0 | 0 |
| RPS29P19 | 0 | 0 |
| RPS29P2  | 0 | 0 |
| RPS29P20 | 0 | 0 |
| RPS29P21 | 0 | 0 |
| RPS29P22 | 0 | 0 |
| RPS29P23 | 0 | 0 |
| RPS29P24 | 0 | 0 |
| RPS29P25 | 0 | 0 |
| RPS29P26 | 0 | 0 |
| RPS29P27 | 0 | 0 |
| RPS29P28 | 0 | 0 |
| RPS29P3  | 0 | 0 |
| RPS29P4  | 0 | 0 |
| RPS29P5  | 0 | 0 |
| RPS29P6  | 0 | 0 |
| RPS29P7  | 0 | 0 |
| RPS29P8  | 0 | 0 |
| RPS29P9  | 0 | 0 |
| RPS2P1   | 0 | 0 |
| RPS2P10  | 0 | 0 |
| RPS2P11  | 0 | 0 |
| RPS2P12  | 0 | 0 |
| RPS2P13  | 0 | 0 |
| RPS2P14  | 0 | 0 |
| RPS2P15  | 0 | 0 |
| RPS2P16  | 0 | 0 |
| RPS2P17  | 0 | 0 |
| RPS2P18  | 0 | 0 |
| RPS2P19  | 0 | 0 |
| RPS2P2   | 0 | 0 |
| RPS2P20  | 0 | 0 |
| RPS2P21  | 0 | 0 |
| RPS2P22  | 0 | 0 |
| RPS2P23  | 0 | 0 |
| RPS2P24  | 0 | 0 |
| RPS2P25  | 0 | 0 |
| RPS2P26  | 0 | 0 |
| RPS2P27  | 0 | 0 |
| RPS2P28  | 0 | 0 |
| RPS2P29  | 0 | 0 |
| RPS2P3   | 0 | 0 |
| RPS2P30  | 0 | 0 |

|          |            |          |
|----------|------------|----------|
| RPS2P31  | 0          | 0        |
| RPS2P32  | 0          | 0        |
| RPS2P33  | 0          | 0        |
| RPS2P34  | 0          | 0        |
| RPS2P35  | 0          | 0        |
| RPS2P36  | 0          | 0        |
| RPS2P37  | 0          | 0        |
| RPS2P38  | 0          | 0        |
| RPS2P39  | 0          | 0        |
| RPS2P4   | 0          | 0        |
| RPS2P40  | 0          | 0        |
| RPS2P41  | 0          | 0        |
| RPS2P42  | 0          | 0        |
| RPS2P43  | 0          | 0        |
| RPS2P44  | 0          | 0        |
| RPS2P45  | 0          | 0        |
| RPS2P46  | 0          | 0        |
| RPS2P47  | 0          | 0        |
| RPS2P48  | 0          | 0        |
| RPS2P49  | 0          | 0        |
| RPS2P5   | 0          | 0        |
| RPS2P50  | 0          | 0        |
| RPS2P51  | 0          | 0        |
| RPS2P52  | 0          | 0        |
| RPS2P53  | 0          | 0        |
| RPS2P54  | 0          | 0        |
| RPS2P55  | 0          | 0        |
| RPS2P6   | 0          | 0        |
| RPS2P7   | 0          | 0        |
| RPS2P8   | 0          | 0        |
| RPS2P9   | 0          | 0        |
| RPS3     | 129.177033 | 120.1924 |
| RPS3A    | 72.7639078 | 55.31844 |
| RPS3AP1  | 0          | 0        |
| RPS3AP10 | 0          | 0        |
| RPS3AP11 | 0          | 0        |
| RPS3AP12 | 0          | 0        |
| RPS3AP13 | 0          | 0        |
| RPS3AP14 | 0          | 0        |
| RPS3AP15 | 0          | 0        |
| RPS3AP16 | 0          | 0        |
| RPS3AP17 | 0          | 0        |
| RPS3AP18 | 0          | 0        |
| RPS3AP19 | 0          | 0        |
| RPS3AP2  | 0          | 0        |
| RPS3AP20 | 0          | 0        |
| RPS3AP21 | 0          | 0        |

|          |   |   |
|----------|---|---|
| RPS3AP22 | 0 | 0 |
| RPS3AP23 | 0 | 0 |
| RPS3AP24 | 0 | 0 |
| RPS3AP25 | 0 | 0 |
| RPS3AP26 | 0 | 0 |
| RPS3AP27 | 0 | 0 |
| RPS3AP28 | 0 | 0 |
| RPS3AP29 | 0 | 0 |
| RPS3AP3  | 0 | 0 |
| RPS3AP30 | 0 | 0 |
| RPS3AP31 | 0 | 0 |
| RPS3AP32 | 0 | 0 |
| RPS3AP33 | 0 | 0 |
| RPS3AP34 | 0 | 0 |
| RPS3AP35 | 0 | 0 |
| RPS3AP36 | 0 | 0 |
| RPS3AP37 | 0 | 0 |
| RPS3AP38 | 0 | 0 |
| RPS3AP39 | 0 | 0 |
| RPS3AP4  | 0 | 0 |
| RPS3AP40 | 0 | 0 |
| RPS3AP41 | 0 | 0 |
| RPS3AP42 | 0 | 0 |
| RPS3AP43 | 0 | 0 |
| RPS3AP44 | 0 | 0 |
| RPS3AP45 | 0 | 0 |
| RPS3AP46 | 0 | 0 |
| RPS3AP47 | 0 | 0 |
| RPS3AP48 | 0 | 0 |
| RPS3AP49 | 0 | 0 |
| RPS3AP5  | 0 | 0 |
| RPS3AP50 | 0 | 0 |
| RPS3AP51 | 0 | 0 |
| RPS3AP6  | 0 | 0 |
| RPS3AP7  | 0 | 0 |
| RPS3AP8  | 0 | 0 |
| RPS3AP9  | 0 | 0 |
| RPS3P1   | 0 | 0 |
| RPS3P2   | 0 | 0 |
| RPS3P3   | 0 | 0 |
| RPS3P4   | 0 | 0 |
| RPS3P5   | 0 | 0 |
| RPS3P6   | 0 | 0 |
| RPS3P7   | 0 | 0 |
| RPS4P1   | 0 | 0 |
| RPS4P10  | 0 | 0 |
| RPS4P11  | 0 | 0 |

|          |            |          |
|----------|------------|----------|
| RPS4P12  | 0          | 0        |
| RPS4P13  | 0          | 0        |
| RPS4P14  | 0          | 0        |
| RPS4P15  | 0          | 0        |
| RPS4P16  | 0          | 0        |
| RPS4P17  | 0          | 0        |
| RPS4P18  | 0          | 0        |
| RPS4P19  | 0          | 0        |
| RPS4P2   | 0          | 0        |
| RPS4P20  | 0          | 0        |
| RPS4P21  | 0          | 0        |
| RPS4P22  | 0          | 0        |
| RPS4P3   | 0          | 0        |
| RPS4P4   | 0          | 0        |
| RPS4P5   | 0          | 0        |
| RPS4P6   | 0          | 0        |
| RPS4P7   | 0          | 0        |
| RPS4P8   | 0          | 0        |
| RPS4P9   | 0          | 0        |
| RPS4X    | 53.7509507 | 52.36735 |
| RPS4Y1   | 0          | 0.026628 |
| RPS4Y1P1 | 0          | 0        |
| RPS4Y2   | 0          | 0        |
| RPS5     | 36.6879257 | 34.26433 |
| RPS5P1   | 0          | 0        |
| RPS5P2   | 0          | 0        |
| RPS5P3   | 0          | 0        |
| RPS5P4   | 0          | 0        |
| RPS5P5   | 0          | 0        |
| RPS5P6   | 0          | 0        |
| RPS5P7   | 0          | 0        |
| RPS5P8   | 0          | 0        |
| RPS6     | 139.061387 | 130.6622 |
| RPS6KA1  | 127.133955 | 142.4917 |
| RPS6KA2  | 15.2036798 | 15.7682  |
| RPS6KA3  | 37.0438516 | 29.54195 |
| RPS6KA4  | 5.31497847 | 6.144496 |
| RPS6KA5  | 2.69505631 | 2.08898  |
| RPS6KA6  | 0.03214882 | 0.027391 |
| RPS6KB1  | 5.85420477 | 5.653573 |
| RPS6KB2  | 28.2475915 | 29.89012 |
| RPS6KC1  | 3.85790492 | 3.225715 |
| RPS6KL1  | 0.02090686 | 0.015834 |
| RPS6P1   | 0          | 0        |
| RPS6P10  | 0          | 0        |
| RPS6P11  | 0          | 0        |
| RPS6P12  | 0          | 0        |

|         |            |          |
|---------|------------|----------|
| RPS6P13 | 0          | 0        |
| RPS6P14 | 0          | 0        |
| RPS6P15 | 0          | 0        |
| RPS6P16 | 0          | 0        |
| RPS6P17 | 0          | 0        |
| RPS6P18 | 0          | 0        |
| RPS6P19 | 0          | 0        |
| RPS6P2  | 0          | 0        |
| RPS6P20 | 0          | 0        |
| RPS6P21 | 0          | 0        |
| RPS6P22 | 0          | 0        |
| RPS6P23 | 0          | 0        |
| RPS6P24 | 0          | 0        |
| RPS6P25 | 0          | 0        |
| RPS6P26 | 0          | 0        |
| RPS6P3  | 0          | 0        |
| RPS6P4  | 0          | 0        |
| RPS6P5  | 0          | 0        |
| RPS6P6  | 0          | 0        |
| RPS6P7  | 0          | 0        |
| RPS6P8  | 0          | 0        |
| RPS6P9  | 0          | 0        |
| RPS7    | 83.7547525 | 80.94034 |
| RPS7P1  | 0          | 0        |
| RPS7P10 | 0          | 0        |
| RPS7P11 | 0          | 0        |
| RPS7P12 | 0          | 0        |
| RPS7P13 | 0          | 0        |
| RPS7P14 | 0          | 0        |
| RPS7P2  | 0          | 0        |
| RPS7P3  | 0          | 0        |
| RPS7P4  | 0          | 0        |
| RPS7P5  | 0          | 0        |
| RPS7P6  | 0          | 0        |
| RPS7P7  | 0          | 0        |
| RPS7P8  | 0          | 0        |
| RPS7P9  | 0          | 0        |
| RPS8    | 96.4182908 | 102.418  |
| RPS8P1  | 0          | 0        |
| RPS8P10 | 0          | 0        |
| RPS8P3  | 0          | 0        |
| RPS8P4  | 0          | 0        |
| RPS8P5  | 0          | 0        |
| RPS8P6  | 0          | 0        |
| RPS8P7  | 0          | 0        |
| RPS8P8  | 0          | 0        |
| RPS8P9  | 0          | 0        |



|         |            |          |
|---------|------------|----------|
| RPS9    | 182.268683 | 173.6612 |
| RPS9P1  | 0          | 0        |
| RPS9P2  | 0          | 0        |
| RPS9P3  | 0          | 0        |
| RPS9P4  | 0          | 0        |
| RPSA    | 30.4106574 | 27.44601 |
| RPSAP1  | 0          | 0        |
| RPSAP10 | 0          | 0        |
| RPSAP11 | 0          | 0        |
| RPSAP12 | 0          | 0        |
| RPSAP13 | 0          | 0        |
| RPSAP14 | 0          | 0        |
| RPSAP15 | 0          | 0        |
| RPSAP16 | 0          | 0        |
| RPSAP17 | 0          | 0        |
| RPSAP18 | 0          | 0        |
| RPSAP19 | 0          | 0        |
| RPSAP2  | 0          | 0        |
| RPSAP20 | 0          | 0        |
| RPSAP21 | 0          | 0        |
| RPSAP22 | 0          | 0        |
| RPSAP23 | 0          | 0        |
| RPSAP24 | 0          | 0        |
| RPSAP25 | 0          | 0        |
| RPSAP26 | 0          | 0        |
| RPSAP27 | 0          | 0        |
| RPSAP28 | 0          | 0        |
| RPSAP29 | 0          | 0        |
| RPSAP3  | 0          | 0        |
| RPSAP30 | 0          | 0        |
| RPSAP31 | 0          | 0        |
| RPSAP32 | 0          | 0        |
| RPSAP33 | 0          | 0        |
| RPSAP34 | 0          | 0        |
| RPSAP35 | 0          | 0        |
| RPSAP36 | 0          | 0        |
| RPSAP37 | 0          | 0        |
| RPSAP38 | 0          | 0        |
| RPSAP39 | 0          | 0        |
| RPSAP4  | 0          | 0        |
| RPSAP40 | 0          | 0        |
| RPSAP41 | 0          | 0        |
| RPSAP42 | 0          | 0        |
| RPSAP43 | 0          | 0        |
| RPSAP44 | 0          | 0        |
| RPSAP45 | 0          | 0        |
| RPSAP46 | 0          | 0        |

|         |            |          |
|---------|------------|----------|
| RPSAP47 | 0          | 0        |
| RPSAP48 | 0          | 0        |
| RPSAP49 | 0          | 0        |
| RPSAP5  | 0          | 0        |
| RPSAP50 | 0          | 0        |
| RPSAP51 | 0          | 0        |
| RPSAP52 | 0          | 0        |
| RPSAP53 | 0          | 0        |
| RPSAP54 | 0          | 0        |
| RPSAP55 | 0          | 0        |
| RPSAP56 | 0          | 0        |
| RPSAP57 | 0          | 0        |
| RPSAP58 | 0          | 0        |
| RPSAP59 | 0          | 0        |
| RPSAP6  | 0          | 0        |
| RPSAP60 | 0          | 0        |
| RPSAP61 | 0          | 0        |
| RPSAP62 | 0          | 0        |
| RPSAP63 | 0          | 0        |
| RPSAP7  | 0          | 0        |
| RPSAP8  | 0          | 0        |
| RPSAP9  | 0          | 0        |
| RPTN    | 0          | 0.006692 |
| RPUSD1  | 9.11781426 | 8.528732 |
| RPUSD2  | 0.8117447  | 0.740321 |
| RPUSD3  | 4.74654986 | 4.788702 |
| RPUSD4  | 1.69910119 | 1.445277 |
| RQCD1   | 10.8163647 | 11.25254 |
| RRAD    | 0.07122402 | 0.178006 |
| RRAGA   | 24.9707623 | 21.87541 |
| RRAGB   | 2.6293572  | 2.44587  |
| RRAGC   | 12.3352496 | 11.74379 |
| RRAGD   | 4.63103615 | 4.868179 |
| RRAS    | 0.42777886 | 0.340174 |
| RRAS2   | 0.02450505 | 0.046397 |
| RRBP1   | 28.7268565 | 31.14764 |
| RREB1   | 15.9659811 | 17.84611 |
| RRH     | 0          | 0        |
| RRM1    | 3.90065683 | 3.383287 |
| RRM2    | 0.02477941 | 0.014075 |
| RRM2B   | 33.2780238 | 40.38667 |
| RRM2P3  | 0          | 0        |
| RRM2P4  | 0          | 0        |
| RRN3    | 6.75212844 | 5.91708  |
| RRP1    | 1.6755106  | 1.639045 |
| RRP12   | 20.0894995 | 22.38487 |
| RRP15   | 0.15963126 | 0.126018 |

|          |            |          |
|----------|------------|----------|
| RRP1B    | 1.0126216  | 1.112792 |
| RRP7A    | 23.1889335 | 21.30829 |
| RRP7B    | 0          | 0        |
| RRP8     | 7.22196255 | 7.105606 |
| RRP9     | 0.58592951 | 0.681105 |
| RRS1     | 0.23416254 | 0.140007 |
| RS1      | 0          | 0        |
| RSAD1    | 5.25002262 | 4.798049 |
| RSAD2    | 15.2301942 | 16.74406 |
| RSBN1    | 8.30425631 | 8.238243 |
| RSBN1L   | 13.7709388 | 12.31344 |
| RSC1A1   | 1.44024651 | 1.326951 |
| RSF1     | 10.5904764 | 10.69108 |
| RSHL1    | 0.0085608  | 0.009725 |
| RSL1D1   | 0.91681412 | 0.753239 |
| RSL24D1  | 21.7532956 | 23.96619 |
| RSL24D1P | 0          | 0        |
| RSPH1    | 0.1230451  | 0.209672 |
| RSPH10B  | 0.06769263 | 0.03845  |
| RSPH10B2 | 0.04738484 | 0.0769   |
| RSPH3    | 0.4828969  | 0.35109  |
| RSPH4A   | 0.40934273 | 0.380471 |
| RSPH9    | 0.29872055 | 0.339351 |
| RSPO1    | 0          | 0.008002 |
| RSPO2    | 0          | 0.007585 |
| RSPO3    | 0          | 0        |
| RSPO4    | 0.01553405 | 0.008823 |
| RSPRY1   | 8.94997196 | 8.507341 |
| RSRC1    | 1.45401616 | 1.417904 |
| RSRC2    | 38.8338667 | 34.46237 |
| RSU1     | 6.41118614 | 6.939722 |
| RTBDN    | 0.02920185 | 0        |
| RTCD1    | 6.23625905 | 5.572889 |
| RTDR1    | 0.0167934  | 0.038155 |
| RTEL1    | 1.374175   | 1.184982 |
| RTF1     | 25.0411231 | 22.92894 |
| RTKN     | 0.0073799  | 0        |
| RTKN2    | 0.00316599 | 0.007193 |
| RTL1     | 0.00515706 | 0.011717 |
| RTN1     | 0.01699703 | 0.006436 |
| RTN2     | 0.69041148 | 0.888894 |
| RTN3     | 52.2168489 | 49.83905 |
| RTN4     | 16.3467504 | 15.47208 |
| RTN4IP1  | 0.27119167 | 0.24465  |
| RTN4R    | 0.0219128  | 0        |
| RTN4RL1  | 0.01329035 | 0.045294 |
| RTN4RL2  | 0.08323567 | 0.13238  |

|          |            |          |
|----------|------------|----------|
| RTP1     | 0.00948369 | 0        |
| RTP2     | 0.0312412  | 0        |
| RTP3     | 0          | 0        |
| RTP4     | 0.43543585 | 0.518217 |
| RTTN     | 1.78075309 | 1.410352 |
| RUFY1    | 23.53829   | 21.39026 |
| RUFY2    | 1.53734346 | 1.4678   |
| RUFY3    | 1.93124499 | 1.994184 |
| RUFY4    | 0.01566716 | 0        |
| RUNDC1   | 10.7323659 | 10.13308 |
| RUNDC2A  | 1.59934679 | 1.689383 |
| RUNDC2B  | 2.23856923 | 2.112688 |
| RUNDC2C  | 0          | 0        |
| RUNDC3A  | 0.05185038 | 0.078537 |
| RUNDC3B  | 0.04614191 | 0.052418 |
| RUNX1    | 21.7656039 | 24.10059 |
| RUNX1T1  | 0.00507858 | 0.005769 |
| RUNX2    | 18.7463246 | 20.27973 |
| RUNX3    | 196.201138 | 287.0021 |
| RUSC1    | 1.54029867 | 1.339784 |
| RUSC2    | 0.26104912 | 0.263605 |
| RUVBL1   | 0.09513724 | 0.094568 |
| RUVBL2   | 5.18568311 | 4.911857 |
| RWDD1    | 8.00277662 | 9.309909 |
| RWDD1L1  | 0          | 0        |
| RWDD2A   | 0.65379121 | 0.658318 |
| RWDD2B   | 0.38227874 | 0.266168 |
| RWDD3    | 3.81210074 | 3.548427 |
| RWDD4A   | 5.22187163 | 4.946511 |
| RXFP1    | 0          | 0        |
| RXFP2    | 0          | 0        |
| RXFP3    | 0          | 0.012897 |
| RXFP4    | 0.07338684 | 0.187579 |
| RXRA     | 79.8140144 | 94.06546 |
| RXRB     | 39.6300064 | 40.90792 |
| RXRG     | 0.01987271 | 0        |
| RYBP     | 18.36228   | 19.36601 |
| RYK      | 18.4364977 | 18.64501 |
| RYKP     | 0          | 0        |
| RYR1     | 0.02322335 | 0.006208 |
| RYR2     | 0.00385432 | 0.002919 |
| RYR3     | 0.0324319  | 0.035308 |
| S100A1   | 0          | 0        |
| S100A10  | 19.1320547 | 19.94576 |
| S100A11  | 973.748914 | 1275.963 |
| S100A11P | 0          | 0        |
| S100A12  | 0.13535621 | 0.153767 |

|          |            |          |
|----------|------------|----------|
| S100A13  | 0.79425698 | 0.663948 |
| S100A14  | 0.02015851 | 0        |
| S100A16  | 0          | 0        |
| S100A2   | 0.04366632 | 0        |
| S100A3   | 0          | 0        |
| S100A4   | 77.0928802 | 75.04329 |
| S100A5   | 0.02961314 | 0        |
| S100A6   | 145.545776 | 136.3165 |
| S100A7   | 0          | 0        |
| S100A7A  | 0.00491361 | 0        |
| S100A7L2 | 0          | 0        |
| S100A7P1 | 0          | 0        |
| S100A7P2 | 0          | 0        |
| S100A8   | 170.676216 | 170.6497 |
| S100A9   | 163.429132 | 171.7493 |
| S100B    | 0.01852452 | 0        |
| S100G    | 0          | 0        |
| S100P    | 216.519683 | 221.8973 |
| S100PBP  | 4.89166449 | 4.923731 |
| S100Z    | 4.67433252 | 3.623373 |
| S1PR1    | 101.597157 | 100.7638 |
| S1PR2    | 5.22113408 | 19.02012 |
| S1PR3    | 0.00999778 | 0.022715 |
| S1PR4    | 106.671647 | 139.8004 |
| S1PR5    | 0.06935783 | 0.033768 |
| SAA1     | 0          | 0.033359 |
| SAA2     | 0.02856703 | 0        |
| SAA3P    | 0          | 0        |
| SAA4     | 0          | 0        |
| SAAL1    | 1.33210784 | 1.26368  |
| SAC3D1   | 0.25493382 | 0.106698 |
| SACM1L   | 22.6814941 | 21.33358 |
| SACS     | 0.40332498 | 0.383347 |
| SAE1     | 7.43712513 | 6.602664 |
| SAFB     | 52.02151   | 49.92851 |
| SAFB2    | 35.9990673 | 32.48029 |
| SAG      | 0.2163842  | 0.109252 |
| SAGE1    | 0.0069026  | 0        |
| SALL1    | 0.00784527 | 0        |
| SALL1P   | 0          | 0        |
| SALL2    | 0.04707483 | 0.038893 |
| SALL3    | 0.01761284 | 0.010004 |
| SALL4    | 0.01206273 | 0.020555 |
| SAMD1    | 9.17733846 | 23.92188 |
| SAMD10   | 0.18316428 | 0.240932 |
| SAMD11   | 0.01646463 | 0.018704 |
| SAMD12   | 0.00402707 | 0        |

|         |            |          |
|---------|------------|----------|
| SAMD13  | 0          | 0.013247 |
| SAMD14  | 0.11310022 | 0.115635 |
| SAMD3   | 0.09352149 | 0.05795  |
| SAMD4A  | 0.03597148 | 0.112376 |
| SAMD4B  | 18.1018978 | 19.3472  |
| SAMD5   | 0.003453   | 0.003923 |
| SAMD7   | 0          | 0.010545 |
| SAMD8   | 2.85373754 | 2.240719 |
| SAMD9   | 18.7770108 | 17.20455 |
| SAMD9L  | 8.09709577 | 6.432538 |
| SAMHD1  | 1.08201444 | 0.66323  |
| SAMM50  | 10.8679887 | 10.10524 |
| SAMSN1  | 317.584951 | 238.4842 |
| SAP130  | 14.5173672 | 12.72186 |
| SAP18   | 17.4617155 | 16.88878 |
| SAP30   | 0.64459987 | 1.076876 |
| SAP30BP | 30.0230708 | 28.17096 |
| SAP30L  | 10.1901082 | 9.88786  |
| SAPS1   | 92.0385742 | 96.89329 |
| SAPS2   | 14.0256391 | 13.48161 |
| SAPS3   | 20.3001733 | 19.00018 |
| SAR1A   | 31.7227894 | 30.82827 |
| SAR1B   | 9.38053228 | 7.961703 |
| SAR1P1  | 0          | 0        |
| SAR1P2  | 0          | 0        |
| SAR1P3  | 0          | 0        |
| SARDH   | 0          | 0.006858 |
| SARM1   | 0.21929549 | 0.208171 |
| SARNP   | 25.5921233 | 23.62828 |
| SARS    | 28.0152827 | 24.41449 |
| SARS2   | 0.20442714 | 0.243844 |
| SART1   | 26.1984615 | 25.75559 |
| SART3   | 14.1115093 | 12.6203  |
| SASH1   | 0.00272737 | 0.003098 |
| SASH3   | 196.329833 | 242.271  |
| SASS6   | 2.25945465 | 2.052196 |
| SAT1    | 1121.81821 | 943.5887 |
| SAT2    | 16.3154765 | 14.00338 |
| SATB1   | 31.1507173 | 36.6927  |
| SATB2   | 0.00416178 | 0        |
| SATL1   | 0.33827884 | 0.221706 |
| SAV1    | 1.05438809 | 1.347527 |
| SBDS    | 15.0648789 | 14.03343 |
| SBDSP   | 0          | 0        |
| SBF1    | 20.5962426 | 21.04229 |
| SBF2    | 0.68680675 | 0.789856 |
| SBK1    | 0.02948264 | 0.023923 |

|          |            |          |
|----------|------------|----------|
| SBK2     | 0.0200815  | 0        |
| SBNO1    | 13.8055774 | 12.20833 |
| SBNO2    | 22.4613076 | 23.9599  |
| SBSN     | 0          | 0        |
| SC4MOL   | 1.06158754 | 1.183647 |
| SC4MOP   | 0          | 0        |
| SC5DL    | 2.25617636 | 2.03242  |
| SC65     | 0.0161609  | 0.027539 |
| SCAF1    | 17.5721374 | 17.54464 |
| SCAMP1   | 2.82178529 | 2.811588 |
| SCAMP2   | 40.2429069 | 43.40392 |
| SCAMP3   | 17.6026027 | 16.34876 |
| SCAMP4   | 6.07620412 | 9.540806 |
| SCAMP5   | 0.037301   | 0.021187 |
| SCAND1   | 23.7398131 | 28.5918  |
| SCAND2   | 0          | 0        |
| SCAND3   | 0.00431112 | 0        |
| SCAP     | 21.8307667 | 17.48581 |
| SCAPER   | 1.03012426 | 1.001601 |
| SCARA3   | 0          | 0        |
| SCARA5   | 0.00577143 | 0        |
| SCARB1   | 0.16869339 | 0.374566 |
| SCARB2   | 2.6126675  | 1.861308 |
| SCARF1   | 1.23421423 | 1.284212 |
| SCARF2   | 2.04978996 | 1.811129 |
| SCARNA1  | 0          | 0        |
| SCARNA10 | 0          | 0        |
| SCARNA11 | 0          | 0        |
| SCARNA12 | 0          | 0        |
| SCARNA13 | 0          | 0        |
| SCARNA14 | 0          | 0        |
| SCARNA15 | 0          | 0        |
| SCARNA16 | 0          | 0        |
| SCARNA17 | 0          | 0        |
| SCARNA18 | 0          | 0        |
| SCARNA2  | 0          | 0        |
| SCARNA20 | 0          | 0        |
| SCARNA21 | 0          | 0        |
| SCARNA22 | 0          | 0        |
| SCARNA23 | 0          | 0        |
| SCARNA27 | 0          | 0        |
| SCARNA3  | 0          | 0        |
| SCARNA4  | 0          | 0        |
| SCARNA5  | 0          | 0        |
| SCARNA6  | 0          | 0        |
| SCARNA7  | 0          | 0        |
| SCARNA8  | 0          | 0        |

|          |            |          |
|----------|------------|----------|
| SCARNA9  | 0          | 0        |
| SCARNA9L | 0          | 0        |
| SCCPDH   | 11.9829089 | 14.25962 |
| SCD      | 0.44219332 | 0.615911 |
| SCD5     | 0.01468933 | 0.011125 |
| SCEL     | 0          | 0        |
| SCFD1    | 13.5552922 | 12.15304 |
| SCFD2    | 0.26480266 | 0.180492 |
| SCG2     | 0          | 0        |
| SCG3     | 0.01270413 | 0.028864 |
| SCG5     | 0.03380278 | 0.057601 |
| SCGB1A1  | 0          | 0.0562   |
| SCGB1C1  | 0.04878267 | 0        |
| SCGB1D1  | 0          | 0        |
| SCGB1D2  | 0          | 0        |
| SCGB1D4  | 0.04844546 | 0        |
| SCGB2A1  | 0          | 0        |
| SCGB2A2  | 0          | 0        |
| SCGB3A1  | 1.03773093 | 1.435157 |
| SCGB3A2  | 0          | 0        |
| SCGBL    | 0.04923965 | 0        |
| SCGN     | 0.01418713 | 0        |
| SCHIP1   | 0.03993415 | 0.022683 |
| SCIN     | 0.01275422 | 0.028978 |
| SCLT1    | 8.36743437 | 6.994198 |
| SCLY     | 0.44443789 | 0.398085 |
| SCMH1    | 8.59275102 | 8.854733 |
| SCML1    | 0.7367172  | 0.984615 |
| SCML2    | 0.03505891 | 0.062586 |
| SCML4    | 0.78335118 | 0.637147 |
| SCN10A   | 0          | 0.004066 |
| SCN11A   | 0.009704   | 0.003675 |
| SCN1A    | 0.00259572 | 0        |
| SCN1B    | 0.36125998 | 0.328318 |
| SCN2A    | 0.0022876  | 0        |
| SCN2B    | 0.02563544 | 0.033976 |
| SCN3A    | 0          | 0.005183 |
| SCN3B    | 0.0693219  | 0.035438 |
| SCN4A    | 0.00538766 | 0.015301 |
| SCN4B    | 0.36649259 | 0.198258 |
| SCN5A    | 0.00489189 | 0.005557 |
| SCN7A    | 0          | 0.004171 |
| SCN8A    | 0.03205525 | 0.013242 |
| SCN9A    | 0          | 0        |
| SCNM1    | 33.2533498 | 30.90032 |
| SCNN1A   | 0.53653157 | 0.693316 |
| SCNN1B   | 0          | 0        |



|          |            |          |
|----------|------------|----------|
| SCNN1D   | 0.39167904 | 0.293669 |
| SCNN1G   | 0.00600895 | 0.006826 |
| SCO1     | 8.84646194 | 7.625805 |
| SCO2     | 11.0324643 | 14.43711 |
| SCOC     | 3.94090728 | 3.330253 |
| SCP2     | 8.58659292 | 8.516358 |
| SCPEP1   | 85.5282358 | 76.92356 |
| SCRG1    | 0          | 0        |
| SCRIB    | 5.39131714 | 4.852092 |
| SCRN1    | 8.51313833 | 7.40817  |
| SCRN2    | 6.68362484 | 5.365684 |
| SCRN3    | 0.77524519 | 0.764556 |
| SCRT1    | 0          | 0        |
| SCRT2    | 0.02938962 | 0.020032 |
| SCT      | 0.12271594 | 0.325284 |
| SCTR     | 0          | 0        |
| SCUBE1   | 0.12632775 | 0.106073 |
| SCUBE2   | 0.01125252 | 0.006392 |
| SCUBE3   | 0.04521577 | 0.032687 |
| SCXA     | 0.03469527 | 0.078829 |
| SCXB     | 0.03469527 | 0        |
| SCYE1    | 4.26180428 | 4.24087  |
| SCYE1P   | 0          | 0        |
| SCYL1    | 14.2867481 | 14.88649 |
| SCYL2    | 23.5602999 | 22.42954 |
| SCYL3    | 5.20039822 | 4.492626 |
| SDAD1    | 2.21539273 | 1.796527 |
| SDAD1P1  | 0          | 0        |
| SDC1     | 0.01246684 | 0.014163 |
| SDC2     | 0.01206619 | 0.013707 |
| SDC3     | 0.02463425 | 0.013992 |
| SDC4     | 0.00804643 | 0        |
| SDC4P    | 0          | 0        |
| SDCBP    | 246.317525 | 210.2154 |
| SDCBP2   | 2.0832438  | 3.476854 |
| SDCCAG1  | 12.3774455 | 11.84113 |
| SDCCAG10 | 1.20289153 | 0.838275 |
| SDCCAG3  | 3.73842581 | 3.775032 |
| SDCCAG3L | 0          | 0        |
| SDCCAG8  | 2.55146105 | 2.008771 |
| SDF2     | 32.3105551 | 28.99541 |
| SDF2L1   | 2.04479763 | 1.63971  |
| SDF4     | 41.9326526 | 39.98354 |
| SDHA     | 31.9338709 | 33.46913 |
| SDHALP1  | 0          | 0        |
| SDHALP2  | 0          | 0        |
| SDHAP3   | 0          | 0        |

|         |            |          |
|---------|------------|----------|
| SDHB    | 26.9700473 | 24.75517 |
| SDHC    | 6.98146924 | 7.914345 |
| SDHD    | 16.9434902 | 16.20338 |
| SDHDP3  | 0          | 0        |
| SDHDP4  | 0          | 0        |
| SDHDP6  | 0          | 0        |
| SDHDP7  | 0          | 0        |
| SDK1    | 0.00395957 | 0.002249 |
| SDK2    | 0.01568762 | 0.011138 |
| SDPR    | 0.09791368 | 0.074154 |
| SDR16C5 | 0          | 0        |
| SDR16C6 | 0          | 0        |
| SDR39U1 | 10.9482024 | 10.12837 |
| SDR42E1 | 0.04546018 | 0.034429 |
| SDR9C7  | 0          | 0        |
| SDS     | 0.02619979 | 0.014882 |
| SDSL    | 0.01505034 | 0.051292 |
| SEBOX   | 0.04435724 | 0.075586 |
| SEC1    | 0          | 0        |
| SEC11A  | 23.184114  | 19.80927 |
| SEC11B  | 0          | 0        |
| SEC11C  | 8.38862309 | 7.574817 |
| SEC13   | 21.09149   | 21.60032 |
| SEC14L1 | 143.330457 | 162.8299 |
| SEC14L2 | 0.04779472 | 0.044424 |
| SEC14L3 | 0          | 0        |
| SEC14L4 | 0          | 0.009558 |
| SEC14L5 | 0.00651342 | 0        |
| SEC16A  | 50.9309693 | 69.63981 |
| SEC16B  | 0.32917392 | 0.338333 |
| SEC22A  | 2.44280257 | 2.257796 |
| SEC22B  | 26.5905202 | 25.97063 |
| SEC22C  | 17.1597789 | 12.50018 |
| SEC23A  | 7.32410644 | 6.722157 |
| SEC23B  | 12.8443876 | 10.26134 |
| SEC23IP | 9.96510501 | 9.141979 |
| SEC24A  | 4.70411742 | 4.607242 |
| SEC24B  | 13.9746496 | 13.42316 |
| SEC24C  | 41.5958093 | 37.81018 |
| SEC24D  | 16.3628099 | 13.23881 |
| SEC31A  | 12.8978504 | 12.84388 |
| SEC31B  | 3.20029973 | 3.273068 |
| SEC61A1 | 39.1304771 | 37.87064 |
| SEC61A2 | 1.73203408 | 1.227912 |
| SEC61B  | 35.428805  | 39.05768 |
| SEC61G  | 20.9350935 | 19.11834 |
| SEC62   | 69.7940699 | 65.79816 |

|           |            |          |
|-----------|------------|----------|
| SEC63     | 9.93689488 | 9.811268 |
| SECISBP2  | 17.6231935 | 15.13573 |
| SECISBP2L | 16.822746  | 17.25055 |
| SECTM1    | 0.37775573 | 0.282602 |
| SEH1L     | 1.33770294 | 1.403804 |
| SEL1L     | 35.7900413 | 38.34905 |
| SEL1L2    | 0          | 0.010706 |
| SELE      | 0.00542589 | 0        |
| SELENBP1  | 0          | 0.028018 |
| SELI      | 1.92173956 | 1.574907 |
| SELK      | 49.6845535 | 47.53662 |
| SELL      | 28.212297  | 21.31407 |
| SELM      | 0.42598355 | 0.276528 |
| SELO      | 59.724655  | 73.98709 |
| SELP      | 0.03314207 | 0.02259  |
| SELPLG    | 179.98444  | 226.4342 |
| SELS      | 10.9677835 | 12.89362 |
| SELT      | 17.3383675 | 17.91041 |
| SELV      | 0          | 0        |
| SEMA3A    | 0.00743076 | 0        |
| SEMA3B    | 1.29298243 | 1.672855 |
| SEMA3C    | 0.18692795 | 0.156957 |
| SEMA3D    | 0          | 0        |
| SEMA3E    | 0.00324766 | 0.003689 |
| SEMA3F    | 0.0358794  | 0.04076  |
| SEMA3G    | 0.00447347 | 0.005082 |
| SEMA4A    | 48.488449  | 55.12802 |
| SEMA4B    | 5.15765983 | 7.155838 |
| SEMA4C    | 0.16574022 | 0.154661 |
| SEMA4D    | 85.054629  | 83.7649  |
| SEMA4F    | 0.11317169 | 0.078257 |
| SEMA4G    | 0.01911394 | 0.021714 |
| SEMA5A    | 0.0035612  | 0.002023 |
| SEMA5B    | 0.01340047 | 0.005074 |
| SEMA6A    | 0.15631077 | 0.201944 |
| SEMA6B    | 229.993571 | 227.1272 |
| SEMA6C    | 0.2647074  | 0.190246 |
| SEMA6D    | 0          | 0.00364  |
| SEMA7A    | 105.911368 | 75.75174 |
| SEMG1     | 0.18147635 | 0.147257 |
| SEMG2     | 0          | 0        |
| SENP1     | 8.08358577 | 8.056044 |
| SENP2     | 13.1424755 | 12.43549 |
| SENP3     | 10.7412017 | 10.55791 |
| SENP5     | 10.032696  | 10.29165 |
| SENP6     | 21.1392379 | 19.83776 |
| SENP7     | 7.52974459 | 7.546997 |

|           |            |          |
|-----------|------------|----------|
| SENP8     | 0.1022775  | 0.066394 |
| SEP15     | 31.1837653 | 31.2194  |
| SEPHS1    | 2.74946636 | 2.462004 |
| SEPHS2    | 23.4025901 | 21.42619 |
| SEPN1     | 14.2255875 | 15.04122 |
| SEPP1     | 0.08589559 | 0.097579 |
| SEPSECS   | 3.57891404 | 3.083337 |
| SEPT1     | 24.7807989 | 29.1879  |
| SEPT10    | 0.00646138 | 0        |
| SEPT11    | 3.92876571 | 3.714984 |
| SEPT12    | 0          | 0        |
| SEPT13    | 0          | 0        |
| SEPT14    | 0          | 0        |
| SEPT2     | 53.4017948 | 52.90687 |
| SEPT3     | 0.00451575 | 0.01026  |
| SEPT4     | 0.05020375 | 0.045626 |
| SEPT5     | 20.309575  | 26.63613 |
| SEPT6     | 21.5807587 | 20.59234 |
| SEPT7     | 51.5508115 | 54.15094 |
| SEPT8     | 0.00712361 | 0.008093 |
| SEPT9     | 38.1621749 | 37.14089 |
| SEPW1     | 20.9053234 | 18.92268 |
| SEPW1P    | 0          | 0        |
| SEPX1     | 103.527069 | 113.7469 |
| SERAC1    | 1.59502511 | 1.567937 |
| SERBP1    | 9.63920037 | 9.56605  |
| SERBP1P   | 0          | 0        |
| SERBP1P2  | 0          | 0        |
| SERF1A    | 1.29062763 | 0.488724 |
| SERF1B    | 0.23373846 | 0.682793 |
| SERF2     | 93.0901797 | 87.48359 |
| SERGEF    | 0.97104942 | 0.703444 |
| SERHL     | 5.27976364 | 4.56053  |
| SERHL2    | 3.85617424 | 2.694463 |
| SERINC1   | 110.127565 | 103.0465 |
| SERINC2   | 4.63252159 | 8.491952 |
| SERINC3   | 42.4210164 | 39.02257 |
| SERINC4   | 3.45718529 | 3.719024 |
| SERINC5   | 6.15721568 | 8.010054 |
| SERP1     | 65.9195827 | 90.1565  |
| SERP2     | 0          | 0.121863 |
| SERPINA1  | 53.8549568 | 67.39915 |
| SERPINA10 | 0          | 0        |
| SERPINA11 | 0          | 0        |
| SERPINA12 | 0          | 0        |
| SERPINA13 | 0          | 0        |
| SERPINA2  | 0          | 0        |

|           |            |          |
|-----------|------------|----------|
| SERPINA3  | 0          | 0        |
| SERPINA4  | 0.01265824 | 0.01438  |
| SERPINA5  | 0          | 0.010331 |
| SERPINA6  | 0          | 0        |
| SERPINA7  | 0          | 0.015331 |
| SERPINA9  | 0.0114206  | 0        |
| SERPINB1  | 127.160161 | 169.5787 |
| SERPINB10 | 0.07043662 | 0.100021 |
| SERPINB11 | 0          | 0        |
| SERPINB12 | 0          | 0        |
| SERPINB13 | 0          | 0.007511 |
| SERPINB2  | 1.03864747 | 0.28671  |
| SERPINB3  | 0          | 0        |
| SERPINB4  | 0          | 0        |
| SERPINB5  | 0.00798531 | 0        |
| SERPINB6  | 23.5800492 | 23.05798 |
| SERPINB7  | 0          | 0        |
| SERPINB8  | 1.25507787 | 1.3627   |
| SERPINB9  | 0.78115826 | 1.486697 |
| SERPINBP1 | 0          | 0        |
| SERPINC1  | 0.04045926 | 0.045962 |
| SERPIND1  | 0          | 0        |
| SERPINE1  | 0.0198602  | 0.007521 |
| SERPINE2  | 0.02758325 | 0.015668 |
| SERPINE3  | 0.10213554 | 0.116028 |
| SERPINF1  | 1.09080835 | 1.161727 |
| SERPINF2  | 1.22432969 | 1.568637 |
| SERPING1  | 0.01060279 | 0        |
| SERPINH1  | 0.06677737 | 0.108372 |
| SERPINHP1 | 0          | 0        |
| SERPINI1  | 0.06342483 | 0.048034 |
| SERPINI2  | 0          | 0        |
| SERTAD1   | 5.6358356  | 5.688819 |
| SERTAD2   | 12.3506766 | 11.58953 |
| SERTAD3   | 17.8571304 | 20.78389 |
| SERTAD4   | 0.01036752 | 0.011778 |
| SESN1     | 2.58339514 | 3.099264 |
| SESN2     | 10.4734504 | 15.21519 |
| SESN3     | 2.76175711 | 2.247869 |
| SESTD1    | 0.64396113 | 0.685828 |
| SET       | 60.1072573 | 62.85171 |
| SETBP1    | 0.05557187 | 0.0849   |
| SETD1A    | 5.91592219 | 5.560966 |
| SETD1B    | 29.4098071 | 32.7688  |
| SETD2     | 20.8208869 | 22.23102 |
| SETD3     | 20.2862587 | 23.83444 |
| SETD4     | 2.83044785 | 2.537072 |

|           |            |          |
|-----------|------------|----------|
| SETD5     | 27.7915024 | 29.91674 |
| SETD6     | 0.79976234 | 0.753134 |
| SETD7     | 0.07196348 | 0.047688 |
| SETD8     | 33.3073036 | 45.58227 |
| SETDB1    | 17.5163801 | 15.62256 |
| SETDB2    | 2.65207328 | 2.259598 |
| SETMAR    | 1.0409552  | 0.981733 |
| SETP2     | 0          | 0        |
| SETX      | 16.6565054 | 15.80415 |
| SEZ6      | 0.13401415 | 0.146604 |
| SEZ6L     | 0          | 0        |
| SEZ6L2    | 0.01183859 | 0.006724 |
| SF1       | 84.7099101 | 81.55686 |
| SF3A1     | 38.983099  | 39.4011  |
| SF3A2     | 13.9022037 | 13.6507  |
| SF3A3     | 149.597339 | 189.2733 |
| SF3A3P1   | 0          | 0        |
| SF3A3P2   | 0          | 0        |
| SF3B1     | 173.180092 | 157.6858 |
| SF3B14    | 25.1158623 | 23.51336 |
| SF3B2     | 73.8937945 | 70.69794 |
| SF3B3     | 12.087143  | 10.75931 |
| SF3B4     | 29.7802299 | 28.31056 |
| SF3B4P    | 0          | 0        |
| SF3B5     | 35.7744437 | 33.67249 |
| SF4       | 19.3129064 | 17.83038 |
| SFI1      | 7.74357203 | 7.482353 |
| SFMBT1    | 11.5727438 | 15.82229 |
| SFMBT2    | 9.02118257 | 5.25549  |
| SFN       | 1.88668369 | 2.452083 |
| SFPQ      | 39.3480893 | 36.91971 |
| SFPQP1    | 0          | 0        |
| SFRP1     | 0          | 0        |
| SFRP2     | 0.01056549 | 0.012003 |
| SFRP4     | 0.00706971 | 0        |
| SFRP5     | 0.01116587 | 0.012685 |
| SFRS1     | 33.1718096 | 32.8034  |
| SFRS11    | 82.6314449 | 77.22422 |
| SFRS12    | 13.7826479 | 14.36406 |
| SFRS12IP1 | 0.91694486 | 0.822183 |
| SFRS14    | 17.656262  | 18.31508 |
| SFRS15    | 12.7314314 | 12.37617 |
| SFRS16    | 43.3306284 | 42.50994 |
| SFRS17A   | 59.8861685 | 57.85256 |
| SFRS18    | 97.0219183 | 90.4402  |
| SFRS2     | 126.042555 | 167.5687 |
| SFRS2B    | 0.25717575 | 0.170884 |

|         |            |          |
|---------|------------|----------|
| SFRS2IP | 35.0754336 | 35.55724 |
| SFRS3   | 24.7836757 | 26.65043 |
| SFRS4   | 48.4330549 | 47.7891  |
| SFRS5   | 190.947191 | 168.6135 |
| SFRS6   | 25.604106  | 23.20304 |
| SFRS7   | 31.9223486 | 31.51414 |
| SFRS8   | 15.252274  | 14.27218 |
| SFRS9   | 81.4980155 | 82.74558 |
| SFRS9P1 | 0          | 0        |
| SFT2D1  | 83.9491869 | 94.12323 |
| SFT2D2  | 5.23177044 | 4.659829 |
| SFT2D3  | 3.34340909 | 3.288345 |
| SFTA1P  | 0          | 0        |
| SFTA2   | 0.0463113  | 0        |
| SFTA3   | 0          | 0        |
| SFTPA1  | 0.01603763 | 0        |
| SFTPA1B | 0.06516115 | 0.024675 |
| SFTPA2  | 0          | 0        |
| SFTPA2B | 0.00961378 | 0.010921 |
| SFTPB   | 0.01190562 | 0.02705  |
| SFTPC   | 0          | 0        |
| SFTPD   | 0.18026394 | 0.093083 |
| SFXN1   | 4.97690883 | 4.056715 |
| SFXN2   | 0.11489252 | 0.13052  |
| SFXN3   | 20.9572878 | 21.00189 |
| SFXN4   | 0.36355039 | 0.550665 |
| SFXN5   | 6.9373435  | 6.900143 |
| SGCA    | 0          | 0.033336 |
| SGCB    | 0.00982722 | 0.005582 |
| SGCD    | 0          | 0        |
| SGCE    | 0          | 0.013196 |
| SGCEP   | 0          | 0        |
| SGCG    | 0.01270413 | 0        |
| SGCZ    | 0.0096535  | 0        |
| SGEF    | 0.08116322 | 0.064542 |
| SGIP1   | 0.01343758 | 0.020354 |
| SGK1    | 152.628525 | 104.8174 |
| SGK196  | 3.08545105 | 2.499432 |
| SGK2    | 0.03764607 | 0.053458 |
| SGK269  | 2.4647006  | 2.608049 |
| SGK3    | 5.51890625 | 6.667282 |
| SGK493  | 0.02522031 | 0.00955  |
| SGMS1   | 9.518262   | 9.489128 |
| SGMS2   | 0.88060848 | 0.434474 |
| SGOL1   | 0.59559533 | 0.6488   |
| SGOL2   | 1.42802103 | 1.346126 |
| SGPL1   | 13.4448684 | 15.62465 |

|                |            |          |
|----------------|------------|----------|
| SGPP1          | 7.85352344 | 4.908394 |
| SGPP2          | 0.80597102 | 0.398085 |
| SGSH           | 0.06836271 | 0.08629  |
| SGSM1          | 0.00680872 | 0.007735 |
| SGSM2          | 38.2577216 | 39.92793 |
| SGSM3          | 27.3561432 | 29.52676 |
| SGTA           | 16.157263  | 15.60012 |
| SGTB           | 1.14900947 | 1.130086 |
| SH2B1          | 10.2226908 | 10.00539 |
| SH2B2          | 1.12615592 | 1.58637  |
| SH2B3          | 7.4712654  | 9.843882 |
| SH2D1A         | 0.04203385 | 0.038201 |
| SH2D1B         | 0.13270426 | 0.122488 |
| SH2D2A         | 0.32729345 | 0.267704 |
| SH2D3A         | 0.10699914 | 0.202588 |
| SH2D3C         | 47.9325214 | 63.90211 |
| SH2D4A         | 0          | 0        |
| SH2D4B         | 0.02050752 | 0.023297 |
| SH2D5          | 0.03290349 | 0.062298 |
| SH2D6          | 0.0705548  | 0.026717 |
| SH2D7          | 0.01111275 | 0        |
| SH3BGR         | 0.06539761 | 0.05572  |
| SH3BGRL        | 54.8983423 | 52.43836 |
| SH3BGRL2       | 0.01810188 | 0.010282 |
| SH3BGRL3       | 330.408833 | 357.1199 |
| SH3BP1         | 85.9622615 | 124.1358 |
| SH3BP2         | 36.1252389 | 42.47067 |
| SH3BP4         | 0          | 0.02765  |
| SH3BP5         | 9.35152373 | 7.701826 |
| SH3BP5L        | 20.1729527 | 15.97345 |
| SH3D19         | 0.02786394 | 0.013566 |
| SH3D20         | 3.93488298 | 4.243495 |
| SH3GL1         | 33.2291457 | 48.02442 |
| SH3GL2         | 0          | 0        |
| SH3GL3         | 0.01240433 | 0.014092 |
| SH3GLB1        | 10.5176142 | 10.22041 |
| SH3GLB2        | 17.4751869 | 19.27422 |
| SH3GLP1        | 0          | 0        |
| SH3GLP2        | 0          | 0        |
| SH3GLP3        | 0          | 0        |
| SH3KBP1        | 31.0946399 | 32.13739 |
| SH3PXD2A       | 0.43931295 | 0.511809 |
| SH3PXD2B       | 0.00270353 | 0.003071 |
| SH3RF1         | 0.01597366 | 0.031756 |
| SH3RF2         | 0          | 0.007849 |
| SH3RF3 (NC_000 | 0.1947574  | 0.163531 |
| SH3RF3 (NC_000 | 0.16729258 | 0.129232 |



|                |            |          |
|----------------|------------|----------|
| SH3TC1         | 0.8538456  | 1.267144 |
| SH3TC2         | 0.00237306 | 0.001797 |
| SH3YL1         | 0.59211121 | 0.428049 |
| SHANK1         | 0.01899021 | 0.021573 |
| SHANK2         | 0.0041879  | 0.014273 |
| SHANK3         | 0.00588533 | 0.006686 |
| SHARPIN        | 14.6343713 | 15.42799 |
| SHB            | 0.60062397 | 0.674384 |
| SHBG           | 0.01739068 | 0.059268 |
| SHC1           | 28.0281181 | 24.33492 |
| SHC1P1         | 0          | 0        |
| SHC2           | 0.00843037 | 0.009577 |
| SHC3           | 0.21828624 | 0.198381 |
| SHC4           | 0.06922299 | 0.178247 |
| SHCBP1         | 0.37707767 | 0.324967 |
| SHCL1          | 0          | 0        |
| SHD            | 0          | 0.009272 |
| SHE            | 0.31994337 | 0.390242 |
| SHF            | 0.07569119 | 0.028662 |
| SHFM1          | 5.74185745 | 4.268624 |
| SHFM1P         | 0          | 0        |
| SHH            | 0          | 0.015156 |
| SHISA2         | 0.02911088 | 0.03307  |
| SHISA3         | 0          | 0        |
| SHISA4         | 2.50608678 | 2.470152 |
| SHISA5         | 44.3220966 | 41.38542 |
| SHKBP1         | 63.5738443 | 58.21301 |
| SHMT1          | 1.95312721 | 1.668829 |
| SHMT1P         | 0          | 0        |
| SHMT2          | 8.51049196 | 8.995394 |
| SHOC2          | 19.6776216 | 21.05303 |
| SHOX (NC_00002 | 0.01438777 | 0        |
| SHOX (NC_00002 | 0          | 0        |
| SHOX2          | 0.00639846 | 0.007269 |
| SHPK           | 3.63204649 | 3.553517 |
| SHPRH          | 2.67001957 | 2.340721 |
| SHQ1           | 0.81207388 | 0.587064 |
| SHROOM1        | 0.00659101 | 0        |
| SHROOM2        | 0.01694452 | 0.006416 |
| SHROOM2P1      | 0          | 0        |
| SHROOM3        | 0.00381585 | 0.004335 |
| SHROOM4        | 0.00659722 | 0        |
| SI             | 0          | 0        |
| SIAE           | 0.15552376 | 0.176677 |
| SIAH1          | 20.0505354 | 18.49139 |
| SIAH1L         | 0          | 0        |
| SIAH2          | 24.7729758 | 18.67961 |

|           |            |          |
|-----------|------------|----------|
| SIAH3     | 0          | 0.005964 |
| SIDT1     | 0.85749051 | 0.615989 |
| SIDT2     | 11.5615178 | 12.8659  |
| SIGIRR    | 6.97808764 | 8.069468 |
| SIGLEC1   | 0.00312877 | 0.007109 |
| SIGLEC10  | 382.607739 | 422.6744 |
| SIGLEC11  | 0.11957534 | 0.173573 |
| SIGLEC12  | 0.21792817 | 0.182986 |
| SIGLEC14  | 0.01990093 | 0.045216 |
| SIGLEC15  | 0.08382192 | 0.079353 |
| SIGLEC16  | 0          | 0        |
| SIGLEC5   | 0.06733493 | 0.038247 |
| SIGLEC6   | 0.01012781 | 0.057527 |
| SIGLEC7   | 11.7713084 | 11.11189 |
| SIGLEC8   | 116.890573 | 123.864  |
| SIGLEC9   | 0.14929229 | 0.0424   |
| SIGLECP1  | 0          | 0        |
| SIGLECP10 | 0          | 0        |
| SIGLECP11 | 0          | 0        |
| SIGLECP12 | 0          | 0        |
| SIGLECP13 | 0          | 0        |
| SIGLECP14 | 0          | 0        |
| SIGLECP15 | 0          | 0        |
| SIGLECP2  | 0          | 0        |
| SIGLECP3  | 0          | 0        |
| SIGLECP4  | 0          | 0        |
| SIGLECP5  | 0          | 0        |
| SIGLECP6  | 0          | 0        |
| SIGLECP7  | 0          | 0        |
| SIGLECP8  | 0          | 0        |
| SIGLECP9  | 0          | 0        |
| SIGMAR1   | 2.48850536 | 1.24041  |
| SIK1      | 6.58996242 | 6.506738 |
| SIK2      | 4.08589428 | 4.532327 |
| SIKE      | 8.00855925 | 8.499422 |
| SIL1      | 4.3128884  | 4.587286 |
| SILV      | 0.03955848 | 0.067409 |
| SIM1      | 0          | 0        |
| SIM2      | 0.0127195  | 0.01445  |
| SIN3A     | 19.4012888 | 20.41048 |
| SIN3B     | 12.3471041 | 9.672328 |
| SIP1      | 1.57806016 | 1.476342 |
| SIPA1     | 124.960588 | 153.6291 |
| SIPA1L1   | 45.1482843 | 42.10809 |
| SIPA1L2   | 0.14580673 | 0.099383 |
| SIPA1L3   | 1.47472261 | 1.603509 |
| SIRPA     | 271.925423 | 298.0838 |

|         |            |          |
|---------|------------|----------|
| SIRPB1  | 19.8330036 | 13.62502 |
| SIRPB2  | 32.1131688 | 34.57566 |
| SIRPD   | 2.7187928  | 1.441343 |
| SIRPG   | 0.17153533 | 0.083514 |
| SIRT1   | 8.81377194 | 8.511805 |
| SIRT2   | 25.0484986 | 22.86407 |
| SIRT3   | 0.99982621 | 0.938285 |
| SIRT4   | 0.25137031 | 0.163178 |
| SIRT5   | 0.98099526 | 0.89609  |
| SIRT6   | 5.68043783 | 5.080696 |
| SIRT7   | 31.16364   | 29.14179 |
| SIT1    | 0.0169833  | 0        |
| SIVA1   | 29.5063659 | 29.49238 |
| SIX1    | 0.01564967 | 0.008889 |
| SIX2    | 0.00976106 | 0.011089 |
| SIX3    | 0          | 0.02815  |
| SIX4    | 0.25034183 | 0.111451 |
| SIX5    | 0.00668532 | 0.015189 |
| SIX6    | 0          | 0        |
| SKAP1   | 0.04002284 | 0.045467 |
| SKAP2   | 13.0303046 | 12.22826 |
| SKCG-1  | 0          | 0        |
| SKI     | 180.806057 | 215.7319 |
| SKIL    | 97.2685253 | 103.136  |
| SKINTL  | 0          | 0        |
| SKIV2L  | 35.3749933 | 32.91219 |
| SKIV2L2 | 7.7219579  | 6.761009 |
| SKP1    | 34.5098985 | 32.18605 |
| SKP2    | 12.101246  | 10.20425 |
| SLA     | 25.5652213 | 18.94564 |
| SLA2    | 11.6882301 | 15.3554  |
| SLAIN1  | 0.13462547 | 0.116952 |
| SLAIN2  | 8.17438005 | 8.133891 |
| SLAMF1  | 0.13659635 | 0.07162  |
| SLAMF6  | 5.46212403 | 2.464545 |
| SLAMF7  | 0.20574279 | 0.197769 |
| SLAMF8  | 0          | 0        |
| SLAMF9  | 0          | 0        |
| SLBP    | 19.0507781 | 26.84825 |
| SLC10A1 | 0.10652479 | 0.181521 |
| SLC10A2 | 0          | 0        |
| SLC10A3 | 15.6233319 | 18.9039  |
| SLC10A4 | 0.03818159 | 0.08675  |
| SLC10A5 | 0.01596456 | 0.018136 |
| SLC10A6 | 0          | 0.021063 |
| SLC10A7 | 2.21364431 | 1.720352 |
| SLC11A1 | 1.58290394 | 3.689419 |

|          |            |          |
|----------|------------|----------|
| SLC11A2  | 3.25680559 | 2.638605 |
| SLC12A1  | 0.15180744 | 0.202889 |
| SLC12A2  | 0.90108561 | 0.860003 |
| SLC12A3  | 0.01510712 | 0.00429  |
| SLC12A4  | 8.6236709  | 10.10141 |
| SLC12A5  | 0.00672165 | 0.015272 |
| SLC12A6  | 70.1630122 | 68.75571 |
| SLC12A7  | 0.05946078 | 0.027019 |
| SLC12A8  | 0.02396049 | 0.034024 |
| SLC12A9  | 11.9105245 | 11.76853 |
| SLC13A1  | 0.00553735 | 0        |
| SLC13A2  | 0          | 0        |
| SLC13A3  | 0.0299293  | 0.017    |
| SLC13A4  | 0.20328359 | 0.164952 |
| SLC13A5  | 0.0064043  | 0.007275 |
| SLC14A1  | 0.16902215 | 0.261834 |
| SLC14A2  | 0.04541108 | 0.040124 |
| SLC15A1  | 0.0067238  | 0.007638 |
| SLC15A2  | 3.04499671 | 2.775769 |
| SLC15A3  | 1.22506665 | 1.018314 |
| SLC15A4  | 9.31024874 | 9.446137 |
| SLC16A1  | 0.03226393 | 0.024435 |
| SLC16A10 | 0.02180297 | 0.016512 |
| SLC16A11 | 0.0116613  | 0.013247 |
| SLC16A12 | 0.00455389 | 0.005173 |
| SLC16A13 | 1.29904791 | 1.134133 |
| SLC16A14 | 10.7134197 | 7.66504  |
| SLC16A2  | 0.00480909 | 0.005463 |
| SLC16A3  | 351.338912 | 482.7671 |
| SLC16A4  | 0.44893945 | 0.198334 |
| SLC16A5  | 6.18007395 | 8.135053 |
| SLC16A6  | 0.72801297 | 1.375394 |
| SLC16A7  | 0.04156377 | 0.047217 |
| SLC16A8  | 0.25505412 | 0.075586 |
| SLC16A9  | 0          | 0.005991 |
| SLC17A1  | 0          | 0        |
| SLC17A2  | 0          | 0.010522 |
| SLC17A3  | 0.01162905 | 0.013211 |
| SLC17A4  | 0          | 0        |
| SLC17A5  | 5.27853813 | 5.052342 |
| SLC17A6  | 0          | 0        |
| SLC17A7  | 0.02119489 | 0.008026 |
| SLC17A8  | 0.00527877 | 0.011994 |
| SLC17A9  | 1.78455741 | 1.999641 |
| SLC18A1  | 0          | 0.008077 |
| SLC18A2  | 16.507216  | 31.72911 |
| SLC18A3  | 0          | 0        |

|            |            |          |
|------------|------------|----------|
| SLC19A1    | 16.1505361 | 18.01062 |
| SLC19A2    | 7.56518918 | 7.149776 |
| SLC19A3    | 0          | 0        |
| SLC1A1     | 0.02259573 | 0        |
| SLC1A2     | 0          | 0.003979 |
| SLC1A3     | 0          | 0.005728 |
| SLC1A4     | 6.5485873  | 12.81047 |
| SLC1A5     | 2.44617856 | 6.049504 |
| SLC1A6     | 0          | 0        |
| SLC1A7     | 0          | 0.008922 |
| SLC20A1    | 10.9349637 | 4.593849 |
| SLC20A1P1  | 0          | 0        |
| SLC20A2    | 2.17384439 | 2.397657 |
| SLC22A1    | 0.01103113 | 0.025063 |
| SLC22A10   | 0          | 0        |
| SLC22A11   | 0          | 0        |
| SLC22A12   | 0          | 0        |
| SLC22A13   | 0          | 0.046651 |
| SLC22A14   | 0.05317484 | 0.024163 |
| SLC22A15   | 9.23421845 | 11.63387 |
| SLC22A16   | 0.02133468 | 0        |
| SLC22A17   | 0.01744841 | 0.039643 |
| SLC22A18   | 7.85376978 | 8.025397 |
| SLC22A18AS | 0.08154621 | 0.046319 |
| SLC22A2    | 0.00836996 | 0        |
| SLC22A20   | 0.54646734 | 1.132952 |
| SLC22A23   | 0.07699236 | 0.069243 |
| SLC22A24   | 0          | 0        |
| SLC22A25   | 0          | 0        |
| SLC22A3    | 0          | 0        |
| SLC22A4    | 18.8863488 | 23.62359 |
| SLC22A5    | 0.63460603 | 0.771897 |
| SLC22A6    | 0          | 0.010877 |
| SLC22A7    | 0.01643246 | 0        |
| SLC22A8    | 0          | 0        |
| SLC22A9    | 0          | 0        |
| SLC23A1    | 0.0267158  | 0.080932 |
| SLC23A2    | 18.9276341 | 13.36069 |
| SLC23A3    | 0.29564154 | 0.345732 |
| SLC23A4    | 0          | 0        |
| SLC24A1    | 0.67800131 | 0.621145 |
| SLC24A2    | 0          | 0.010754 |
| SLC24A3    | 5.01169499 | 5.165178 |
| SLC24A4    | 0.03255415 | 0.021133 |
| SLC24A5    | 0.02600536 | 0.029542 |
| SLC24A6    | 58.9924441 | 68.41286 |
| SLC25A1    | 11.5507912 | 11.59921 |

|            |            |          |
|------------|------------|----------|
| SLC25A10   | 0.05577011 | 0.101369 |
| SLC25A11   | 12.2847803 | 12.9772  |
| SLC25A12   | 0.64145078 | 0.461509 |
| SLC25A13   | 4.70598317 | 4.507472 |
| SLC25A14   | 4.52143481 | 4.133097 |
| SLC25A15   | 0.45397075 | 0.928292 |
| SLC25A15P1 | 0          | 0        |
| SLC25A16   | 2.66227156 | 2.930458 |
| SLC25A17   | 2.58873228 | 2.202996 |
| SLC25A18   | 0.09066985 | 0.080113 |
| SLC25A19   | 3.18050618 | 2.675353 |
| SLC25A2    | 0.01483792 | 0.016856 |
| SLC25A20   | 30.0972885 | 28.8079  |
| SLC25A20P  | 0          | 0        |
| SLC25A21   | 0          | 0        |
| SLC25A22   | 1.65668004 | 1.274913 |
| SLC25A23   | 0.03038343 | 0.02071  |
| SLC25A24   | 4.13844457 | 4.059955 |
| SLC25A25   | 5.01808155 | 4.856537 |
| SLC25A26   | 2.73400713 | 1.90061  |
| SLC25A27   | 0.06394998 | 0.064576 |
| SLC25A28   | 35.4523587 | 28.43173 |
| SLC25A29   | 12.5530984 | 13.51474 |
| SLC25A3    | 68.0820241 | 64.31508 |
| SLC25A30   | 4.0607354  | 2.921388 |
| SLC25A31   | 0          | 0        |
| SLC25A32   | 2.69769458 | 3.696505 |
| SLC25A33   | 2.33135087 | 2.468618 |
| SLC25A34   | 0.10272963 | 0.140043 |
| SLC25A35   | 2.97449925 | 2.958838 |
| SLC25A36   | 16.7264379 | 15.38363 |
| SLC25A37   | 35.793794  | 25.58844 |
| SLC25A38   | 14.4821371 | 10.58187 |
| SLC25A39   | 3.90470432 | 4.643503 |
| SLC25A4    | 0.06342483 | 0.12609  |
| SLC25A40   | 22.0661889 | 18.06755 |
| SLC25A41   | 0          | 0.0154   |
| SLC25A42   | 0.83562213 | 0.482295 |
| SLC25A43   | 0.16662726 | 0.14627  |
| SLC25A44   | 20.3711838 | 19.2817  |
| SLC25A45   | 3.8353294  | 2.779282 |
| SLC25A46   | 8.70481243 | 8.28688  |
| SLC25A5    | 32.1274917 | 32.83272 |
| SLC25A5P1  | 0          | 0        |
| SLC25A5P2  | 0          | 0        |
| SLC25A5P3  | 0          | 0        |
| SLC25A5P4  | 0          | 0        |

|                |            |          |
|----------------|------------|----------|
| SLC25A5P5      | 0          | 0        |
| SLC25A5P6      | 0          | 0        |
| SLC25A5P7      | 0          | 0        |
| SLC25A5P8      | 0          | 0        |
| SLC25A5P9      | 0          | 0        |
| SLC25A6 (NC_00 | 5.53681619 | 4.568462 |
| SLC25A6 (NC_00 | 5.08631659 | 4.796336 |
| SLC25A6P1      | 0          | 0        |
| SLC26A1        | 0.01027631 | 0.011674 |
| SLC26A10       | 0          | 0.009915 |
| SLC26A11       | 0.10249117 | 0.074849 |
| SLC26A2        | 1.7757617  | 1.434586 |
| SLC26A3        | 0.01453029 | 0.016507 |
| SLC26A4        | 0.08529546 | 0.106587 |
| SLC26A5        | 0.02203913 | 0.008346 |
| SLC26A6        | 1.36046259 | 1.46286  |
| SLC26A7        | 0.0036477  | 0        |
| SLC26A8        | 0.18899174 | 0.087221 |
| SLC26A9        | 0.00815251 | 0        |
| SLC27A1        | 0.16597386 | 0.202017 |
| SLC27A2        | 0.14357887 | 0.152914 |
| SLC27A3        | 30.174356  | 28.07218 |
| SLC27A4        | 1.93278992 | 1.434079 |
| SLC27A5        | 0.08890203 | 0.020199 |
| SLC27A6        | 0          | 0        |
| SLC28A1        | 0          | 0        |
| SLC28A2        | 0          | 0.009717 |
| SLC28A3        | 0.20939669 | 0.118939 |
| SLC29A1        | 255.736375 | 252.144  |
| SLC29A2        | 0.08359973 | 0.085474 |
| SLC29A3        | 0.8532556  | 1.095744 |
| SLC29A4        | 0.03636342 | 0.049571 |
| SLC2A1         | 4.19933722 | 5.955007 |
| SLC2A10        | 0.16875856 | 0.140965 |
| SLC2A11        | 0.98645407 | 0.815002 |
| SLC2A12        | 0.24033241 | 0.2005   |
| SLC2A13        | 0.81062964 | 0.907245 |
| SLC2A14        | 0.41188575 | 0.652896 |
| SLC2A2         | 0          | 0.006945 |
| SLC2A3         | 120.957053 | 155.981  |
| SLC2A3P1       | 0          | 0        |
| SLC2A3P2       | 0          | 0        |
| SLC2A3P4       | 0          | 0        |
| SLC2A4         | 0.01335366 | 0        |
| SLC2A4RG       | 22.363055  | 21.69468 |
| SLC2A5         | 0.03682195 | 0.050196 |
| SLC2A6         | 0.27252    | 0.206391 |

|          |            |          |
|----------|------------|----------|
| SLC2A7   | 0          | 0        |
| SLC2A8   | 3.77301157 | 3.585028 |
| SLC2A9   | 0.05056597 | 0        |
| SLC2AXP1 | 0          | 0        |
| SLC30A1  | 8.44972419 | 11.89521 |
| SLC30A10 | 0          | 0        |
| SLC30A2  | 0.00850195 | 0        |
| SLC30A3  | 0.0200911  | 0        |
| SLC30A4  | 0.0245222  | 0.039001 |
| SLC30A5  | 9.4762055  | 9.458296 |
| SLC30A6  | 2.42864027 | 2.19353  |
| SLC30A7  | 10.1825453 | 10.6605  |
| SLC30A8  | 0.00782629 | 0.013336 |
| SLC30A9  | 4.44878208 | 4.270168 |
| SLC31A1  | 1.8173842  | 1.699652 |
| SLC31A1P | 0          | 0        |
| SLC31A2  | 5.0844797  | 5.937617 |
| SLC32A1  | 0          | 0.009279 |
| SLC33A1  | 5.57459884 | 5.120163 |
| SLC34A1  | 0          | 0.009247 |
| SLC34A2  | 0          | 0        |
| SLC34A3  | 0.00989893 | 0.033736 |
| SLC35A1  | 8.58221799 | 6.992598 |
| SLC35A2  | 4.92498279 | 4.163233 |
| SLC35A3  | 3.67869914 | 3.434388 |
| SLC35A4  | 8.15849312 | 6.535369 |
| SLC35A5  | 6.0644492  | 4.208329 |
| SLC35B1  | 12.1790914 | 11.13699 |
| SLC35B2  | 17.923064  | 25.14962 |
| SLC35B3  | 5.81874848 | 5.564206 |
| SLC35B4  | 0.31772434 | 0.217265 |
| SLC35C1  | 2.21797467 | 1.645365 |
| SLC35C2  | 29.995911  | 33.93025 |
| SLC35D1  | 20.2980396 | 22.42046 |
| SLC35D2  | 4.09903439 | 4.553742 |
| SLC35D3  | 0.00891282 | 0.010125 |
| SLC35E1  | 31.8827078 | 39.29577 |
| SLC35E2  | 3.27877539 | 4.092204 |
| SLC35E3  | 1.57667586 | 1.241578 |
| SLC35E4  | 0.06616941 | 0.159735 |
| SLC35F1  | 0.00433333 | 0        |
| SLC35F2  | 0.01989779 | 0.097952 |
| SLC35F3  | 0.07999953 | 0.090881 |
| SLC35F4  | 0.01181862 | 0.013426 |
| SLC35F5  | 8.41603838 | 8.764024 |
| SLC36A1  | 6.8615492  | 5.713725 |
| SLC36A2  | 0.02458384 | 0.006982 |



|          |            |          |
|----------|------------|----------|
| SLC36A3  | 0.00704838 | 0        |
| SLC36A4  | 16.7520284 | 12.80009 |
| SLC37A1  | 20.2166644 | 22.98961 |
| SLC37A2  | 0.46600471 | 0.705852 |
| SLC37A3  | 2.71786217 | 2.596992 |
| SLC37A4  | 2.21105748 | 1.866564 |
| SLC38A1  | 5.33375015 | 4.10046  |
| SLC38A10 | 15.8278178 | 17.30516 |
| SLC38A11 | 0          | 0        |
| SLC38A2  | 59.1111424 | 55.99601 |
| SLC38A3  | 0.00857127 | 0        |
| SLC38A4  | 0          | 0        |
| SLC38A5  | 0.50739864 | 0.468335 |
| SLC38A6  | 0.08321371 | 0.126043 |
| SLC38A7  | 0.81129117 | 0.671849 |
| SLC38A8  | 0          | 0        |
| SLC38A9  | 2.92179885 | 2.564844 |
| SLC39A1  | 6.50598416 | 5.904848 |
| SLC39A10 | 1.70866491 | 1.616838 |
| SLC39A11 | 4.1559021  | 4.651357 |
| SLC39A12 | 0          | 0        |
| SLC39A13 | 1.10251633 | 1.878714 |
| SLC39A14 | 0.28948494 | 0.256781 |
| SLC39A2  | 0.08953299 | 0.084759 |
| SLC39A3  | 4.78235745 | 2.855565 |
| SLC39A4  | 1.34529895 | 1.574038 |
| SLC39A5  | 0.02990801 | 0.033976 |
| SLC39A6  | 11.5270705 | 10.92002 |
| SLC39A7  | 21.256661  | 19.06721 |
| SLC39A8  | 1.86472791 | 1.876375 |
| SLC39A9  | 9.20271846 | 7.69931  |
| SLC3A1   | 0.28987962 | 0.370471 |
| SLC3A2   | 27.7808788 | 31.48617 |
| SLC40A1  | 11.2176878 | 9.938484 |
| SLC41A1  | 1.01791363 | 0.979221 |
| SLC41A2  | 0.08898983 | 0.141531 |
| SLC41A3  | 1.23857208 | 1.199866 |
| SLC43A1  | 0.80801912 | 0.831867 |
| SLC43A2  | 66.7962364 | 78.0544  |
| SLC43A3  | 10.6169726 | 9.420314 |
| SLC44A1  | 6.830917   | 7.728464 |
| SLC44A2  | 92.1538302 | 100.1816 |
| SLC44A3  | 0          | 0        |
| SLC44A4  | 0.00798228 | 0        |
| SLC44A5  | 0.00995518 | 0.005655 |
| SLC45A1  | 0.51665745 | 0.706307 |
| SLC45A2  | 0.01395178 | 0        |

|          |            |          |
|----------|------------|----------|
| SLC45A3  | 1.19984887 | 2.909718 |
| SLC45A4  | 67.9212854 | 80.56272 |
| SLC46A1  | 0.01620574 | 0.033138 |
| SLC46A2  | 0.2605057  | 0.362763 |
| SLC46A3  | 1.11255115 | 1.04966  |
| SLC47A1  | 1.12212044 | 1.296599 |
| SLC47A2  | 0.00892795 | 0.010142 |
| SLC48A1  | 2.27300875 | 2.534939 |
| SLC4A1   | 0.00424497 | 0.004822 |
| SLC4A10  | 0          | 0        |
| SLC4A11  | 0.0407731  | 0.038599 |
| SLC4A1AP | 8.26854766 | 7.302249 |
| SLC4A2   | 18.5887885 | 22.3858  |
| SLC4A3   | 0.00977695 | 0.022214 |
| SLC4A4   | 0.00524977 | 0.005964 |
| SLC4A5   | 0.85468825 | 0.634845 |
| SLC4A7   | 0.97577919 | 1.086946 |
| SLC4A8   | 8.80253008 | 7.306787 |
| SLC4A9   | 0.0128556  | 0        |
| SLC5A1   | 0.00833842 | 0.004736 |
| SLC5A10  | 0.15727223 | 0.212163 |
| SLC5A11  | 0.06262865 | 0.040656 |
| SLC5A12  | 0          | 0        |
| SLC5A2   | 0.05550021 | 0.084065 |
| SLC5A3   | 0.00363257 | 0.002063 |
| SLC5A4   | 0          | 0        |
| SLC5A5   | 0.0176387  | 0.013359 |
| SLC5A6   | 8.55720942 | 6.25038  |
| SLC5A7   | 0          | 0        |
| SLC5A8   | 0.00639846 | 0        |
| SLC5A9   | 0.4816432  | 0.423133 |
| SLC6A1   | 0          | 0.005315 |
| SLC6A10P | 0          | 0        |
| SLC6A11  | 0.01056019 | 0        |
| SLC6A12  | 0.01102534 | 0.006262 |
| SLC6A13  | 0.03849031 | 0.021863 |
| SLC6A14  | 0.00463419 | 0        |
| SLC6A15  | 0          | 0        |
| SLC6A16  | 1.53250028 | 1.366723 |
| SLC6A17  | 0.00656734 | 0.00373  |
| SLC6A18  | 0          | 0.011261 |
| SLC6A19  | 0          | 0.009233 |
| SLC6A2   | 0          | 0        |
| SLC6A20  | 0          | 0.013191 |
| SLC6A21P | 0          | 0        |
| SLC6A3   | 0.01607032 | 0.006085 |
| SLC6A4   | 0          | 0.025906 |

|          |            |          |
|----------|------------|----------|
| SLC6A5   | 0.00734381 | 0.008343 |
| SLC6A6   | 148.425619 | 168.4992 |
| SLC6A6P  | 0          | 0        |
| SLC6A7   | 0.00562325 | 0.006388 |
| SLC6A8   | 0.27619482 | 0.470643 |
| SLC6A9   | 0.01729531 | 0.039295 |
| SLC7A1   | 1.27703903 | 1.785772 |
| SLC7A10  | 0.01080438 | 0.024548 |
| SLC7A11  | 1.07218728 | 0.331738 |
| SLC7A13  | 0          | 0        |
| SLC7A14  | 0          | 0.004714 |
| SLC7A2   | 0          | 0        |
| SLC7A3   | 0          | 0        |
| SLC7A4   | 0.02727021 | 0.020653 |
| SLC7A5   | 13.055791  | 32.97544 |
| SLC7A5P1 | 0          | 0        |
| SLC7A6   | 17.9020028 | 20.5138  |
| SLC7A6OS | 15.7526437 | 13.5998  |
| SLC7A7   | 0.18057603 | 0.142704 |
| SLC7A8   | 9.42980547 | 12.75626 |
| SLC7A9   | 0.03551576 | 0.013449 |
| SLC8A1   | 0.00336729 | 0.007651 |
| SLC8A2   | 0.02056871 | 0.037386 |
| SLC8A3   | 0.0374316  | 0.017009 |
| SLC9A1   | 13.244303  | 12.06271 |
| SLC9A10  | 0          | 0        |
| SLC9A11  | 0          | 0        |
| SLC9A2   | 0.00772706 | 0        |
| SLC9A3   | 0.19685222 | 0.094612 |
| SLC9A3P  | 0          | 0        |
| SLC9A3P2 | 0          | 0        |
| SLC9A3P3 | 0          | 0        |
| SLC9A3P4 | 0          | 0        |
| SLC9A3R1 | 172.000637 | 201.3786 |
| SLC9A3R2 | 0.00966682 | 0.010982 |
| SLC9A4   | 0          | 0.005772 |
| SLC9A5   | 0.07880981 | 0.070344 |
| SLC9A6   | 1.9926694  | 1.940318 |
| SLC9A7   | 0.06689878 | 0.065141 |
| SLC9A8   | 22.9413084 | 19.61214 |
| SLC9A9   | 0.42050662 | 0.351642 |
| SLCO1A2  | 0          | 0.006069 |
| SLCO1B1  | 0          | 0        |
| SLCO1B3  | 0.0077527  | 0        |
| SLCO1C1  | 0.00624824 | 0        |
| SLCO2A1  | 0          | 0.005656 |
| SLCO2B1  | 0          | 0        |

|         |            |          |
|---------|------------|----------|
| SLCO3A1 | 44.1962528 | 40.8932  |
| SLCO4A1 | 11.2776361 | 15.30678 |
| SLCO4C1 | 7.84803786 | 9.005053 |
| SLCO5A1 | 0.02277934 | 0.012939 |
| SLCO6A1 | 0          | 0        |
| SLED1   | 0          | 0        |
| SLFN11  | 7.42117344 | 6.838532 |
| SLFN12  | 9.16781781 | 8.567485 |
| SLFN12L | 0.91015438 | 0.860177 |
| SLFN13  | 31.057609  | 33.88589 |
| SLFN14  | 0.02188619 | 0.016575 |
| SLFN5   | 3.68191765 | 3.474478 |
| SLFNL1  | 0.14009703 | 0.061212 |
| SLIT1   | 0.05302063 | 0.048186 |
| SLIT2   | 0          | 0        |
| SLIT3   | 0.03908054 | 0.044396 |
| SLITRK1 | 0          | 0.004606 |
| SLITRK2 | 0          | 0        |
| SLITRK3 | 0.00497995 | 0        |
| SLITRK4 | 0.04971997 | 0.021181 |
| SLITRK5 | 0.00945596 | 0        |
| SLITRK6 | 0          | 0        |
| SLK     | 29.4227116 | 31.65224 |
| SLMAP   | 12.7008221 | 10.44568 |
| SLMO1   | 0.58875456 | 0.926079 |
| SLMO2   | 9.43391752 | 9.291242 |
| SLN     | 0          | 0        |
| SLPI    | 0.03515942 | 0.039942 |
| SLTM    | 35.3328988 | 36.75784 |
| SLU7    | 24.9764395 | 23.99246 |
| SLURP1  | 0          | 0        |
| SMA4    | 0          | 0        |
| SMA5    | 0          | 0        |
| SMAD1   | 0.01347778 | 0.015311 |
| SMAD2   | 7.65056315 | 7.46674  |
| SMAD3   | 15.4895074 | 11.46269 |
| SMAD4   | 10.8170678 | 11.24822 |
| SMAD5   | 11.3053753 | 7.460099 |
| SMAD5OS | 0          | 0        |
| SMAD6   | 0.18041538 | 1.135134 |
| SMAD7   | 92.3561671 | 189.9822 |
| SMAD9   | 0.20551747 | 0.274075 |
| SMAGP   | 0.39030074 | 0.346999 |
| SMAP1   | 12.3515146 | 14.77681 |
| SMAP2   | 149.070902 | 113.4728 |
| SMARCA1 | 0.0308742  | 0.011691 |
| SMARCA2 | 36.9632403 | 39.29405 |

|          |            |          |
|----------|------------|----------|
| SMARCA4  | 12.2859508 | 17.70954 |
| SMARCA5  | 26.3922228 | 25.69618 |
| SMARCAD1 | 0.52683978 | 0.411182 |
| SMARCAL1 | 3.09047033 | 2.755421 |
| SMARCB1  | 20.9512546 | 21.65508 |
| SMARCC1  | 12.3807316 | 11.27666 |
| SMARCC2  | 31.3621994 | 27.00476 |
| SMARCD1  | 17.4076741 | 15.39402 |
| SMARCD2  | 33.2306494 | 32.02502 |
| SMARCD3  | 1.22647764 | 1.156935 |
| SMARCE1  | 24.6668316 | 24.1806  |
| SMC1A    | 8.59390134 | 7.594114 |
| SMC1B    | 0.08898565 | 0.15725  |
| SMC2     | 1.82610444 | 2.477961 |
| SMC3     | 25.0647306 | 26.33054 |
| SMC4     | 18.5430383 | 15.72241 |
| SMC5     | 13.1791639 | 12.81747 |
| SMC6     | 3.5222127  | 2.933976 |
| SMCHD1   | 53.6398088 | 50.69251 |
| SMCP     | 0          | 0.03102  |
| SMCR5    | 0          | 0        |
| SMCR7    | 1.37519178 | 1.101695 |
| SMCR7L   | 7.27899245 | 7.078777 |
| SMCR8    | 32.3982386 | 28.60465 |
| SMEK1    | 40.4956297 | 37.94997 |
| SMEK2    | 32.236011  | 31.49855 |
| SMEK3P   | 0          | 0        |
| SMG1     | 16.7234161 | 15.13987 |
| SMG5     | 30.2777668 | 27.13051 |
| SMG6     | 9.44519308 | 10.50577 |
| SMG7     | 14.5719038 | 13.5044  |
| SMN1     | 3.50637827 | 1.925507 |
| SMN2     | 2.38924215 | 3.05166  |
| SMNDC1   | 16.3207966 | 17.42236 |
| SMNP     | 0          | 0        |
| SMO      | 0.01124951 | 0.01278  |
| SMOC1    | 0.00573053 | 0.00651  |
| SMOC2    | 0          | 0        |
| SMOX     | 0.05547581 | 0.073525 |
| SMPD1    | 8.95196164 | 9.835045 |
| SMPD2    | 23.4532561 | 34.83245 |
| SMPD3    | 17.2145147 | 12.21681 |
| SMPD4    | 19.4148172 | 16.38779 |
| SMPDL3A  | 2.22226733 | 1.730174 |
| SMPDL3B  | 4.71241456 | 5.605796 |
| SMPX     | 0          | 0.026958 |
| SMR3A    | 0          | 0        |

|          |            |          |
|----------|------------|----------|
| SMR3B    | 0          | 0        |
| SMS      | 43.1841365 | 34.46927 |
| SMTN     | 0.23616796 | 0.340801 |
| SMTNL1   | 0.72395659 | 0.544423 |
| SMTNL2   | 0.07874656 | 0.039759 |
| SMU1     | 7.30297421 | 7.336309 |
| SMUG1    | 6.06654454 | 5.689829 |
| SMURF1   | 15.5243685 | 16.82824 |
| SMURF2   | 18.8825528 | 21.02458 |
| SMYD1    | 0          | 0        |
| SMYD2    | 11.8290883 | 13.25376 |
| SMYD3    | 1.48616551 | 1.315103 |
| SMYD4    | 2.10544385 | 1.708441 |
| SMYD5    | 0.09828748 | 0.120961 |
| SNAI1    | 0.18606488 | 0.126824 |
| SNAI1L1  | 0          | 0        |
| SNAI2    | 0          | 0        |
| SNAI3    | 13.0840647 | 21.64022 |
| SNAP23   | 142.875645 | 113.6691 |
| SNAP23P  | 0          | 0        |
| SNAP25   | 0          | 0        |
| SNAP29   | 9.30402961 | 9.779333 |
| SNAP47   | 6.07576104 | 5.691255 |
| SNAP91   | 0.00944534 | 0        |
| SNAPC1   | 0.78370021 | 0.710438 |
| SNAPC2   | 3.73814543 | 2.825799 |
| SNAPC3   | 2.65618882 | 1.991069 |
| SNAPC4   | 5.05964416 | 6.050894 |
| SNAPC5   | 9.13329663 | 9.280202 |
| SNAPIN   | 13.1433711 | 12.06948 |
| SNAR-A1  | 0          | 0        |
| SNAR-A10 | 0          | 0        |
| SNAR-A11 | 0          | 0        |
| SNAR-A12 | 0          | 0        |
| SNAR-A13 | 0          | 0        |
| SNAR-A14 | 0          | 0        |
| SNAR-A2  | 0          | 0        |
| SNAR-A3  | 0          | 0        |
| SNAR-A4  | 0          | 0        |
| SNAR-A5  | 0          | 0        |
| SNAR-A6  | 0          | 0        |
| SNAR-A7  | 0          | 0        |
| SNAR-A8  | 0          | 0        |
| SNAR-A9  | 0          | 0        |
| SNAR-B1  | 0          | 0        |
| SNAR-B2  | 0          | 0        |
| SNAR-C1  | 0          | 0        |

|            |            |          |
|------------|------------|----------|
| SNAR-C2    | 0          | 0        |
| SNAR-C3    | 0          | 0        |
| SNAR-C4    | 0          | 0        |
| SNAR-C5    | 0          | 0        |
| SNAR-D     | 0          | 0        |
| SNAR-E     | 0          | 0        |
| SNAR-F     | 0          | 0        |
| SNAR-G1    | 0          | 0        |
| SNAR-G2    | 0          | 0        |
| SNAR-H     | 0          | 0        |
| SNAR-I     | 0          | 0        |
| SNCA       | 0.02725254 | 0.030959 |
| SNCAIP     | 0          | 0        |
| SNCB       | 0          | 0.032945 |
| SNCG       | 0          | 0.028917 |
| SND1       | 5.4241518  | 5.624031 |
| SNED1      | 0.15690545 | 0.136307 |
| SNF8       | 20.5230784 | 19.28123 |
| SNHG1      | 0          | 0        |
| SNHG10     | 0          | 0        |
| SNHG11     | 0          | 0        |
| SNHG12     | 0          | 0        |
| SNHG3      | 0          | 0        |
| SNHG3-RCC1 | 2.15207732 | 2.093025 |
| SNHG4      | 0          | 0        |
| SNHG5      | 0          | 0        |
| SNHG6      | 0          | 0        |
| SNHG7      | 0          | 0        |
| SNHG8      | 0          | 0        |
| SNHG9      | 0          | 0        |
| SNIP       | 0.00596463 | 0.003388 |
| SNIP1      | 9.52989505 | 8.303241 |
| SNN        | 15.5795519 | 14.57619 |
| SNORA1     | 0          | 0        |
| SNORA10    | 0          | 0        |
| SNORA11    | 0          | 0        |
| SNORA11B   | 0          | 0        |
| SNORA11C   | 0          | 0        |
| SNORA11D   | 0          | 0        |
| SNORA11E   | 0          | 0        |
| SNORA12    | 0          | 0        |
| SNORA13    | 0          | 0        |
| SNORA14A   | 0          | 0        |
| SNORA14B   | 0          | 0        |
| SNORA15    | 0          | 0        |
| SNORA16A   | 0          | 0        |
| SNORA16B   | 0          | 0        |

|          |   |   |
|----------|---|---|
| SNORA17  | 0 | 0 |
| SNORA18  | 0 | 0 |
| SNORA19  | 0 | 0 |
| SNORA20  | 0 | 0 |
| SNORA21  | 0 | 0 |
| SNORA22  | 0 | 0 |
| SNORA23  | 0 | 0 |
| SNORA24  | 0 | 0 |
| SNORA25  | 0 | 0 |
| SNORA26  | 0 | 0 |
| SNORA27  | 0 | 0 |
| SNORA28  | 0 | 0 |
| SNORA29  | 0 | 0 |
| SNORA2A  | 0 | 0 |
| SNORA2B  | 0 | 0 |
| SNORA3   | 0 | 0 |
| SNORA30  | 0 | 0 |
| SNORA31  | 0 | 0 |
| SNORA32  | 0 | 0 |
| SNORA33  | 0 | 0 |
| SNORA34  | 0 | 0 |
| SNORA35  | 0 | 0 |
| SNORA36A | 0 | 0 |
| SNORA36B | 0 | 0 |
| SNORA36C | 0 | 0 |
| SNORA37  | 0 | 0 |
| SNORA38  | 0 | 0 |
| SNORA38B | 0 | 0 |
| SNORA39  | 0 | 0 |
| SNORA4   | 0 | 0 |
| SNORA40  | 0 | 0 |
| SNORA41  | 0 | 0 |
| SNORA42  | 0 | 0 |
| SNORA43  | 0 | 0 |
| SNORA44  | 0 | 0 |
| SNORA45  | 0 | 0 |
| SNORA46  | 0 | 0 |
| SNORA47  | 0 | 0 |
| SNORA48  | 0 | 0 |
| SNORA49  | 0 | 0 |
| SNORA50  | 0 | 0 |
| SNORA51  | 0 | 0 |
| SNORA52  | 0 | 0 |
| SNORA53  | 0 | 0 |
| SNORA54  | 0 | 0 |
| SNORA55  | 0 | 0 |
| SNORA56  | 0 | 0 |



|           |   |   |
|-----------|---|---|
| SNORA57   | 0 | 0 |
| SNORA58   | 0 | 0 |
| SNORA59A  | 0 | 0 |
| SNORA59B  | 0 | 0 |
| SNORA5A   | 0 | 0 |
| SNORA5B   | 0 | 0 |
| SNORA5C   | 0 | 0 |
| SNORA6    | 0 | 0 |
| SNORA60   | 0 | 0 |
| SNORA61   | 0 | 0 |
| SNORA62   | 0 | 0 |
| SNORA63   | 0 | 0 |
| SNORA64   | 0 | 0 |
| SNORA65   | 0 | 0 |
| SNORA66   | 0 | 0 |
| SNORA67   | 0 | 0 |
| SNORA68   | 0 | 0 |
| SNORA69   | 0 | 0 |
| SNORA70   | 0 | 0 |
| SNORA70B  | 0 | 0 |
| SNORA70C  | 0 | 0 |
| SNORA71A  | 0 | 0 |
| SNORA71B  | 0 | 0 |
| SNORA71C  | 0 | 0 |
| SNORA71D  | 0 | 0 |
| SNORA72   | 0 | 0 |
| SNORA73A  | 0 | 0 |
| SNORA73B  | 0 | 0 |
| SNORA74A  | 0 | 0 |
| SNORA74B  | 0 | 0 |
| SNORA75   | 0 | 0 |
| SNORA76   | 0 | 0 |
| SNORA77   | 0 | 0 |
| SNORA78   | 0 | 0 |
| SNORA79   | 0 | 0 |
| SNORA7A   | 0 | 0 |
| SNORA7B   | 0 | 0 |
| SNORA8    | 0 | 0 |
| SNORA80   | 0 | 0 |
| SNORA81   | 0 | 0 |
| SNORA84   | 0 | 0 |
| SNORA9    | 0 | 0 |
| SNORD10   | 0 | 0 |
| SNORD100  | 0 | 0 |
| SNORD101  | 0 | 0 |
| SNORD102  | 0 | 0 |
| SNORD103A | 0 | 0 |

|             |   |   |
|-------------|---|---|
| SNORD104    | 0 | 0 |
| SNORD105    | 0 | 0 |
| SNORD105B   | 0 | 0 |
| SNORD107    | 0 | 0 |
| SNORD108    | 0 | 0 |
| SNORD109A   | 0 | 0 |
| SNORD109B   | 0 | 0 |
| SNORD11     | 0 | 0 |
| SNORD110    | 0 | 0 |
| SNORD111    | 0 | 0 |
| SNORD111B   | 0 | 0 |
| SNORD112    | 0 | 0 |
| SNORD113-1  | 0 | 0 |
| SNORD113-2  | 0 | 0 |
| SNORD113-3  | 0 | 0 |
| SNORD113-4  | 0 | 0 |
| SNORD113-5  | 0 | 0 |
| SNORD113-6  | 0 | 0 |
| SNORD113-7  | 0 | 0 |
| SNORD113-8  | 0 | 0 |
| SNORD113-9  | 0 | 0 |
| SNORD114-1  | 0 | 0 |
| SNORD114-10 | 0 | 0 |
| SNORD114-11 | 0 | 0 |
| SNORD114-12 | 0 | 0 |
| SNORD114-13 | 0 | 0 |
| SNORD114-14 | 0 | 0 |
| SNORD114-15 | 0 | 0 |
| SNORD114-16 | 0 | 0 |
| SNORD114-17 | 0 | 0 |
| SNORD114-18 | 0 | 0 |
| SNORD114-19 | 0 | 0 |
| SNORD114-2  | 0 | 0 |
| SNORD114-20 | 0 | 0 |
| SNORD114-21 | 0 | 0 |
| SNORD114-22 | 0 | 0 |
| SNORD114-23 | 0 | 0 |
| SNORD114-24 | 0 | 0 |
| SNORD114-25 | 0 | 0 |
| SNORD114-26 | 0 | 0 |
| SNORD114-27 | 0 | 0 |
| SNORD114-28 | 0 | 0 |
| SNORD114-29 | 0 | 0 |
| SNORD114-3  | 0 | 0 |
| SNORD114-30 | 0 | 0 |
| SNORD114-31 | 0 | 0 |
| SNORD114-4  | 0 | 0 |

|             |   |   |
|-------------|---|---|
| SNORD114-5  | 0 | 0 |
| SNORD114-6  | 0 | 0 |
| SNORD114-7  | 0 | 0 |
| SNORD114-8  | 0 | 0 |
| SNORD114-9  | 0 | 0 |
| SNORD115@   | 0 | 0 |
| SNORD115-1  | 0 | 0 |
| SNORD115-10 | 0 | 0 |
| SNORD115-11 | 0 | 0 |
| SNORD115-12 | 0 | 0 |
| SNORD115-13 | 0 | 0 |
| SNORD115-14 | 0 | 0 |
| SNORD115-15 | 0 | 0 |
| SNORD115-16 | 0 | 0 |
| SNORD115-17 | 0 | 0 |
| SNORD115-18 | 0 | 0 |
| SNORD115-19 | 0 | 0 |
| SNORD115-2  | 0 | 0 |
| SNORD115-20 | 0 | 0 |
| SNORD115-21 | 0 | 0 |
| SNORD115-22 | 0 | 0 |
| SNORD115-23 | 0 | 0 |
| SNORD115-25 | 0 | 0 |
| SNORD115-26 | 0 | 0 |
| SNORD115-29 | 0 | 0 |
| SNORD115-3  | 0 | 0 |
| SNORD115-30 | 0 | 0 |
| SNORD115-31 | 0 | 0 |
| SNORD115-32 | 0 | 0 |
| SNORD115-33 | 0 | 0 |
| SNORD115-34 | 0 | 0 |
| SNORD115-35 | 0 | 0 |
| SNORD115-36 | 0 | 0 |
| SNORD115-37 | 0 | 0 |
| SNORD115-38 | 0 | 0 |
| SNORD115-39 | 0 | 0 |
| SNORD115-4  | 0 | 0 |
| SNORD115-40 | 0 | 0 |
| SNORD115-41 | 0 | 0 |
| SNORD115-42 | 0 | 0 |
| SNORD115-43 | 0 | 0 |
| SNORD115-44 | 0 | 0 |
| SNORD115-48 | 0 | 0 |
| SNORD115-5  | 0 | 0 |
| SNORD115-6  | 0 | 0 |
| SNORD115-7  | 0 | 0 |
| SNORD115-8  | 0 | 0 |

|             |   |   |
|-------------|---|---|
| SNORD115-9  | 0 | 0 |
| SNORD116@   | 0 | 0 |
| SNORD116-1  | 0 | 0 |
| SNORD116-10 | 0 | 0 |
| SNORD116-11 | 0 | 0 |
| SNORD116-12 | 0 | 0 |
| SNORD116-13 | 0 | 0 |
| SNORD116-14 | 0 | 0 |
| SNORD116-15 | 0 | 0 |
| SNORD116-16 | 0 | 0 |
| SNORD116-17 | 0 | 0 |
| SNORD116-18 | 0 | 0 |
| SNORD116-19 | 0 | 0 |
| SNORD116-2  | 0 | 0 |
| SNORD116-20 | 0 | 0 |
| SNORD116-21 | 0 | 0 |
| SNORD116-22 | 0 | 0 |
| SNORD116-23 | 0 | 0 |
| SNORD116-24 | 0 | 0 |
| SNORD116-25 | 0 | 0 |
| SNORD116-26 | 0 | 0 |
| SNORD116-27 | 0 | 0 |
| SNORD116-28 | 0 | 0 |
| SNORD116-29 | 0 | 0 |
| SNORD116-3  | 0 | 0 |
| SNORD116-4  | 0 | 0 |
| SNORD116-5  | 0 | 0 |
| SNORD116-6  | 0 | 0 |
| SNORD116-7  | 0 | 0 |
| SNORD116-8  | 0 | 0 |
| SNORD116-9  | 0 | 0 |
| SNORD117    | 0 | 0 |
| SNORD119    | 0 | 0 |
| SNORD11B    | 0 | 0 |
| SNORD12     | 0 | 0 |
| SNORD121A   | 0 | 0 |
| SNORD121B   | 0 | 0 |
| SNORD123    | 0 | 0 |
| SNORD124    | 0 | 0 |
| SNORD125    | 0 | 0 |
| SNORD126    | 0 | 0 |
| SNORD127    | 0 | 0 |
| SNORD12B    | 0 | 0 |
| SNORD12C    | 0 | 0 |
| SNORD13     | 0 | 0 |
| SNORD14A    | 0 | 0 |
| SNORD14B    | 0 | 0 |

|           |   |   |
|-----------|---|---|
| SNORD15A  | 0 | 0 |
| SNORD15B  | 0 | 0 |
| SNORD16   | 0 | 0 |
| SNORD17   | 0 | 0 |
| SNORD18A  | 0 | 0 |
| SNORD18B  | 0 | 0 |
| SNORD18C  | 0 | 0 |
| SNORD19   | 0 | 0 |
| SNORD19B  | 0 | 0 |
| SNORD1A   | 0 | 0 |
| SNORD1B   | 0 | 0 |
| SNORD1C   | 0 | 0 |
| SNORD2    | 0 | 0 |
| SNORD20   | 0 | 0 |
| SNORD21   | 0 | 0 |
| SNORD22   | 0 | 0 |
| SNORD23   | 0 | 0 |
| SNORD24   | 0 | 0 |
| SNORD25   | 0 | 0 |
| SNORD26   | 0 | 0 |
| SNORD27   | 0 | 0 |
| SNORD28   | 0 | 0 |
| SNORD29   | 0 | 0 |
| SNORD30   | 0 | 0 |
| SNORD31   | 0 | 0 |
| SNORD32A  | 0 | 0 |
| SNORD32B  | 0 | 0 |
| SNORD33   | 0 | 0 |
| SNORD34   | 0 | 0 |
| SNORD35A  | 0 | 0 |
| SNORD35B  | 0 | 0 |
| SNORD36A  | 0 | 0 |
| SNORD36B  | 0 | 0 |
| SNORD36C  | 0 | 0 |
| SNORD37   | 0 | 0 |
| SNORD38A  | 0 | 0 |
| SNORD38B  | 0 | 0 |
| SNORD3A   | 0 | 0 |
| SNORD3B-1 | 0 | 0 |
| SNORD3B-2 | 0 | 0 |
| SNORD3C   | 0 | 0 |
| SNORD3D   | 0 | 0 |
| SNORD41   | 0 | 0 |
| SNORD42A  | 0 | 0 |
| SNORD42B  | 0 | 0 |
| SNORD43   | 0 | 0 |
| SNORD44   | 0 | 0 |

|          |   |   |
|----------|---|---|
| SNORD45A | 0 | 0 |
| SNORD45B | 0 | 0 |
| SNORD45C | 0 | 0 |
| SNORD46  | 0 | 0 |
| SNORD47  | 0 | 0 |
| SNORD48  | 0 | 0 |
| SNORD49A | 0 | 0 |
| SNORD49B | 0 | 0 |
| SNORD4A  | 0 | 0 |
| SNORD4B  | 0 | 0 |
| SNORD5   | 0 | 0 |
| SNORD50A | 0 | 0 |
| SNORD50B | 0 | 0 |
| SNORD51  | 0 | 0 |
| SNORD52  | 0 | 0 |
| SNORD53  | 0 | 0 |
| SNORD54  | 0 | 0 |
| SNORD55  | 0 | 0 |
| SNORD56  | 0 | 0 |
| SNORD56B | 0 | 0 |
| SNORD57  | 0 | 0 |
| SNORD58A | 0 | 0 |
| SNORD58B | 0 | 0 |
| SNORD58C | 0 | 0 |
| SNORD59A | 0 | 0 |
| SNORD59B | 0 | 0 |
| SNORD6   | 0 | 0 |
| SNORD60  | 0 | 0 |
| SNORD61  | 0 | 0 |
| SNORD62A | 0 | 0 |
| SNORD62B | 0 | 0 |
| SNORD63  | 0 | 0 |
| SNORD64  | 0 | 0 |
| SNORD65  | 0 | 0 |
| SNORD66  | 0 | 0 |
| SNORD67  | 0 | 0 |
| SNORD68  | 0 | 0 |
| SNORD69  | 0 | 0 |
| SNORD7   | 0 | 0 |
| SNORD70  | 0 | 0 |
| SNORD71  | 0 | 0 |
| SNORD72  | 0 | 0 |
| SNORD73A | 0 | 0 |
| SNORD73B | 0 | 0 |
| SNORD74  | 0 | 0 |
| SNORD75  | 0 | 0 |
| SNORD76  | 0 | 0 |

|          |            |          |
|----------|------------|----------|
| SNORD77  | 0          | 0        |
| SNORD78  | 0          | 0        |
| SNORD79  | 0          | 0        |
| SNORD8   | 0          | 0        |
| SNORD80  | 0          | 0        |
| SNORD81  | 0          | 0        |
| SNORD82  | 0          | 0        |
| SNORD83A | 0          | 0        |
| SNORD83B | 0          | 0        |
| SNORD84  | 0          | 0        |
| SNORD85  | 0          | 0        |
| SNORD86  | 0          | 0        |
| SNORD87  | 0          | 0        |
| SNORD88A | 0          | 0        |
| SNORD88B | 0          | 0        |
| SNORD88C | 0          | 0        |
| SNORD89  | 0          | 0        |
| SNORD9   | 0          | 0        |
| SNORD90  | 0          | 0        |
| SNORD91A | 0          | 0        |
| SNORD91B | 0          | 0        |
| SNORD92  | 0          | 0        |
| SNORD93  | 0          | 0        |
| SNORD94  | 0          | 0        |
| SNORD95  | 0          | 0        |
| SNORD96A | 0          | 0        |
| SNORD96B | 0          | 0        |
| SNORD97  | 0          | 0        |
| SNORD98  | 0          | 0        |
| SNORD99  | 0          | 0        |
| SNPH     | 0.02947083 | 0.038262 |
| SNRK     | 20.388444  | 20.12559 |
| SNRNP200 | 50.4308963 | 45.82558 |
| SNRNP25  | 21.8384653 | 33.65029 |
| SNRNP27  | 13.7323565 | 12.94627 |
| SNRNP35  | 10.2873481 | 11.24779 |
| SNRNP40  | 10.7327582 | 10.663   |
| SNRNP48  | 3.63270156 | 3.331209 |
| SNRNP70  | 93.8541035 | 85.85225 |
| SNRPA    | 8.67982218 | 7.703914 |
| SNRPA1   | 18.702419  | 18.15629 |
| SNRPB    | 59.6842222 | 62.18829 |
| SNRPB2   | 25.0137427 | 24.1275  |
| SNRPC    | 16.9559121 | 15.44325 |
| SNRPD1   | 1.57689982 | 1.492819 |
| SNRPD2   | 19.9251683 | 16.35852 |
| SNRPD3   | 15.3477326 | 12.33058 |

|         |            |          |
|---------|------------|----------|
| SNRPE   | 3.24825734 | 2.94897  |
| SNRPEL1 | 0          | 0        |
| SNRPEP1 | 0          | 0        |
| SNRPF   | 4.21567166 | 2.620434 |
| SNRPP1  | 0          | 0        |
| SNRPG   | 27.6071737 | 26.91748 |
| SNRPGP  | 0          | 0        |
| SNRPN   | 10.2910129 | 11.69075 |
| SNTA1   | 0.58403697 | 0.592024 |
| SNTB1   | 12.1165073 | 9.765289 |
| SNTB2   | 1.82258268 | 1.412915 |
| SNTG1   | 0.0111304  | 0.012644 |
| SNTG2   | 0          | 0        |
| SNTN    | 0          | 0.01506  |
| SNUPN   | 0.54105329 | 0.356494 |
| SNURF   | 0.01474427 | 0.033499 |
| SNW1    | 31.4539742 | 28.36567 |
| SNX1    | 18.219737  | 16.93545 |
| SNX10   | 1.50064426 | 3.678196 |
| SNX11   | 12.6222012 | 11.45531 |
| SNX12   | 4.58496314 | 4.464506 |
| SNX13   | 8.626623   | 7.243138 |
| SNX14   | 18.2659437 | 17.82013 |
| SNX15   | 6.01353101 | 4.691941 |
| SNX16   | 2.11713402 | 1.962781 |
| SNX17   | 28.8570866 | 24.46967 |
| SNX18   | 8.43035513 | 10.39903 |
| SNX19   | 6.12287526 | 5.564547 |
| SNX19P  | 0          | 0        |
| SNX2    | 19.5111819 | 17.88209 |
| SNX20   | 26.3389534 | 29.40624 |
| SNX21   | 2.13951232 | 2.062941 |
| SNX22   | 0.04654196 | 0.112354 |
| SNX24   | 0.34435498 | 0.54767  |
| SNX25   | 0.94885558 | 1.077915 |
| SNX26   | 14.8359617 | 14.60093 |
| SNX27   | 5.73633941 | 4.787136 |
| SNX29   | 2.79817342 | 2.69104  |
| SNX3    | 54.2149074 | 57.44499 |
| SNX30   | 10.6564095 | 13.34941 |
| SNX31   | 0.00855732 | 0        |
| SNX32   | 0.07398943 | 0.056035 |
| SNX33   | 0.36418761 | 0.310292 |
| SNX4    | 9.3214522  | 8.441172 |
| SNX5    | 18.5663394 | 17.0314  |
| SNX6    | 18.0562587 | 17.55136 |
| SNX7    | 0          | 0.025182 |



|         |            |          |
|---------|------------|----------|
| SNX8    | 1.23843984 | 1.055165 |
| SNX9    | 1.80717726 | 1.808444 |
| SOAT1   | 1.02245199 | 1.091126 |
| SOAT2   | 0.02028493 | 0.011522 |
| SOBP    | 0.02361639 | 0.030661 |
| SOCS1   | 2.36880785 | 2.632076 |
| SOCS2   | 1.23678417 | 0.399886 |
| SOCS2P1 | 0          | 0        |
| SOCS2P2 | 0          | 0        |
| SOCS3   | 64.3372051 | 49.14182 |
| SOCS4   | 7.89986412 | 7.394064 |
| SOCS5   | 4.79857403 | 4.170416 |
| SOCS6   | 2.76933028 | 3.852832 |
| SOCS7   | 4.3066284  | 3.805199 |
| SOD1    | 18.7617343 | 19.23666 |
| SOD2    | 59.5954482 | 50.7962  |
| SOD3    | 0          | 0.015621 |
| SOHLH1  | 0.01058144 | 0.012021 |
| SOHLH2  | 0.00997407 | 0        |
| SOLH    | 5.4025882  | 6.384131 |
| SON     | 53.5491397 | 50.56802 |
| SONP1   | 0          | 0        |
| SORBS1  | 0.26351008 | 0.230028 |
| SORBS2  | 0.00237065 | 0.005386 |
| SORBS3  | 0.05763874 | 0.058203 |
| SORCS1  | 0.00282865 | 0        |
| SORCS2  | 0          | 0        |
| SORCS3  | 0          | 0        |
| SORD    | 81.2380167 | 36.21535 |
| SORD2   | 0          | 0        |
| SORL1   | 237.060414 | 232.2392 |
| SORT1   | 10.9950078 | 11.75537 |
| SOS1    | 9.25134784 | 8.872925 |
| SOS2    | 71.7148593 | 83.24048 |
| SOST    | 0.00914145 | 0        |
| SOSTDC1 | 0          | 0        |
| SOX1    | 0          | 0.005814 |
| SOX10   | 0.01469275 | 0.016691 |
| SOX11   | 0.00723432 | 0.005479 |
| SOX12   | 4.33221722 | 4.916309 |
| SOX13   | 1.54863719 | 1.108344 |
| SOX14   | 0.02570334 | 0        |
| SOX15   | 0.42231655 | 0.359819 |
| SOX17   | 0          | 0        |
| SOX18   | 0.04932629 | 0.014009 |
| SOX2    | 0.03360021 | 0.03817  |
| SOX21   | 0.0167266  | 0.028503 |

|         |            |          |
|---------|------------|----------|
| SOX2OT  | 0          | 0        |
| SOX3    | 0.02027515 | 0        |
| SOX30   | 0.00643961 | 0.014631 |
| SOX4    | 0.21546763 | 0.176238 |
| SOX5    | 0.00892038 | 0.015201 |
| SOX5P   | 0          | 0        |
| SOX6    | 0.02757162 | 0.008949 |
| SOX7    | 0.01961318 | 0.014854 |
| SOX8    | 0.01379162 | 0.015668 |
| SOX9    | 0.01068632 | 0.01214  |
| SP1     | 27.3312923 | 24.53635 |
| SP100   | 19.7036166 | 21.50284 |
| SP110   | 29.8500473 | 24.99526 |
| SP140   | 7.98467586 | 6.25913  |
| SP140L  | 9.0547621  | 9.462729 |
| SP2     | 10.5464465 | 10.03144 |
| SP3     | 34.296429  | 35.81364 |
| SP3P    | 0          | 0        |
| SP4     | 2.79324652 | 1.434504 |
| SP5     | 0          | 0        |
| SP6     | 0.02770866 | 0.050364 |
| SP7     | 0.00706971 | 0.008031 |
| SP8     | 0.01127666 | 0.006405 |
| SP9     | 0.0289008  | 0        |
| SPA17   | 0.08946949 | 0.050819 |
| SPA17P1 | 0          | 0        |
| SPACA1  | 0.04207871 | 0        |
| SPACA3  | 0          | 0        |
| SPACA4  | 0          | 0        |
| SPACA5  | 0.08570108 | 0.032453 |
| SPACA5B | 0          | 0        |
| SPAG1   | 2.10466982 | 4.05974  |
| SPAG11A | 0          | 0        |
| SPAG11B | 0.0156206  | 0        |
| SPAG16  | 0.09775726 | 0.068341 |
| SPAG17  | 0.01180369 | 0        |
| SPAG4   | 9.60040939 | 10.42917 |
| SPAG4L  | 0          | 0.019078 |
| SPAG5   | 1.50733071 | 1.430096 |
| SPAG6   | 0.0810537  | 0.055247 |
| SPAG7   | 21.0458435 | 20.99559 |
| SPAG8   | 0.08114407 | 0.010242 |
| SPAG9   | 9.08818851 | 8.381297 |
| SPAM1   | 0          | 0.009508 |
| SPANXA1 | 0          | 0        |
| SPANXA2 | 0          | 0        |
| SPANXB1 | 0          | 0        |

|          |            |          |
|----------|------------|----------|
| SPANXB2  | 0          | 0        |
| SPANXC   | 0          | 0        |
| SPANXD   | 0          | 0        |
| SPANXN1  | 0          | 0        |
| SPANXN2  | 0          | 0        |
| SPANXN3  | 0.03539618 | 0        |
| SPANXN4  | 0          | 0        |
| SPANXN5  | 0          | 0        |
| SPARC    | 0.1004075  | 0.060834 |
| SPARCL1  | 0.01398426 | 0        |
| SPAST    | 11.2084011 | 13.2186  |
| SPATA1   | 1.98472332 | 1.95325  |
| SPATA12  | 0          | 0        |
| SPATA13  | 0.1620565  | 0.211373 |
| SPATA16  | 0.01010347 | 0        |
| SPATA17  | 0          | 0        |
| SPATA18  | 0          | 0        |
| SPATA19  | 0          | 0        |
| SPATA2   | 3.80946763 | 4.133428 |
| SPATA20  | 2.93564268 | 2.629469 |
| SPATA21  | 0.05217204 | 0.023707 |
| SPATA22  | 0.01443056 | 0        |
| SPATA2L  | 4.50089087 | 6.082095 |
| SPATA3   | 0          | 0.054908 |
| SPATA4   | 0          | 0        |
| SPATA5   | 0.08264471 | 0.102687 |
| SPATA5L1 | 5.68161594 | 6.026016 |
| SPATA6   | 2.58736103 | 2.843138 |
| SPATA7   | 0.05285402 | 0.048034 |
| SPATA8   | 0.06147758 | 0.093119 |
| SPATA9   | 3.01095057 | 2.098936 |
| SPATC1   | 0.04130713 | 0.070388 |
| SPATS1   | 0.01552831 | 0        |
| SPATS2   | 0.1384703  | 0.20135  |
| SPC24    | 0.03214882 | 0.036522 |
| SPC25    | 0          | 0        |
| SPCS1    | 36.3728537 | 33.9895  |
| SPCS2    | 11.6384679 | 11.06053 |
| SPCS3    | 29.1225537 | 31.37909 |
| SPDEF    | 0.04440408 | 0.063055 |
| SPDYA    | 0.0779799  | 0.155026 |
| SPDYC    | 0          | 0        |
| SPDYE1   | 0.00793409 | 0        |
| SPDYE2   | 0          | 0        |
| SPDYE3   | 0.36460111 | 0.163167 |
| SPDYE4   | 2.05014061 | 2.924179 |
| SPDYE5   | 0.18132081 | 0.188072 |

|          |            |          |
|----------|------------|----------|
| SPDYE6   | 0.08343385 | 0.065618 |
| SPDYE7P  | 0          | 0        |
| SPDYE8P  | 0          | 0        |
| SPEF1    | 0          | 0        |
| SPEF2    | 0.00602014 | 0.003419 |
| SPEG     | 0.0217163  | 0.020185 |
| SPEM1    | 0          | 0        |
| SPEN     | 24.3802357 | 26.84853 |
| SPERT    | 0          | 0        |
| SPESP1   | 0.01498598 | 0        |
| SPG11    | 19.8428586 | 17.02749 |
| SPG20    | 8.7063187  | 7.623755 |
| SPG21    | 6.77945862 | 6.780454 |
| SPG7     | 17.7249943 | 18.17255 |
| SPHAR    | 2.43392077 | 2.616089 |
| SPHK1    | 0.27250328 | 0.735224 |
| SPHK2    | 2.47649021 | 2.490887 |
| SPHKAP   | 0          | 0        |
| SPI1     | 392.418091 | 480.8744 |
| SPIB     | 0.10005256 | 0.178611 |
| SPIC     | 0          | 0        |
| SPIN1    | 10.2646268 | 13.16183 |
| SPIN2A   | 0.03188071 | 0.054325 |
| SPIN2B   | 0.04998098 | 0.075706 |
| SPIN3    | 0.52810878 | 0.503521 |
| SPIN4    | 2.94006938 | 2.974021 |
| SPINK1   | 0          | 0        |
| SPINK2   | 0.21345514 | 0.242488 |
| SPINK4   | 0          | 0.12981  |
| SPINK5   | 0.01097355 | 0        |
| SPINK5L2 | 0          | 0        |
| SPINK5L3 | 0.04130713 | 0        |
| SPINK6   | 0          | 0        |
| SPINK7   | 0          | 0        |
| SPINK8   | 0.09556969 | 0.217137 |
| SPINK9   | 0          | 0        |
| SPINLW1  | 0          | 0        |
| SPINT1   | 1.46067206 | 1.261103 |
| SPINT2   | 44.0692021 | 44.73841 |
| SPINT3   | 0          | 0        |
| SPINT4   | 0          | 0        |
| SPIRE1   | 0.56691537 | 0.726149 |
| SPIRE2   | 0.57035423 | 0.390231 |
| SPN      | 18.3719119 | 23.14865 |
| SPNS1    | 11.1349697 | 11.64574 |
| SPNS2    | 7.3678097  | 10.38555 |
| SPNS3    | 131.30558  | 146.2379 |

|                |            |          |
|----------------|------------|----------|
| SPO11          | 0          | 0        |
| SPOCD1         | 0.00540775 | 0.006143 |
| SPOCK1         | 0.00435578 | 0.014845 |
| SPOCK2         | 1.7141715  | 3.976933 |
| SPOCK3         | 0          | 0        |
| SPON1          | 0.00390515 | 0.004436 |
| SPON2          | 0.09644647 | 0.085217 |
| SPOP           | 14.8469227 | 13.02617 |
| SPOPL          | 28.1498894 | 28.74627 |
| SPP1           | 0.38815996 | 0.308669 |
| SPP2           | 0          | 0        |
| SPPL2A         | 39.2368241 | 37.66955 |
| SPPL2B         | 5.09370892 | 4.991199 |
| SPPL3          | 11.7081993 | 11.92501 |
| SPR            | 0          | 0.016371 |
| SPRED1         | 0.00289805 | 0.003292 |
| SPRED2         | 0.31198878 | 0.467429 |
| SPRED3         | 0.08766643 | 0.016598 |
| SPRN           | 0.2584267  | 0.286049 |
| SPRR1A         | 0          | 0        |
| SPRR1B         | 0          | 0        |
| SPRR2A         | 0          | 0        |
| SPRR2B         | 0          | 0        |
| SPRR2C         | 0          | 0        |
| SPRR2D         | 0          | 0        |
| SPRR2E         | 0          | 0        |
| SPRR2F         | 0          | 0        |
| SPRR2G         | 0          | 0        |
| SPRR3          | 0          | 0.024224 |
| SPRR4          | 0          | 0        |
| SPRY1          | 1.04403859 | 0.985329 |
| SPRY2          | 0.83663089 | 0.644932 |
| SPRY3 (NC_0000 | 0.1907587  | 0.10571  |
| SPRY3 (NC_0000 | 0.14888484 | 0.198206 |
| SPRY4          | 0          | 0        |
| SPRYD3         | 14.9502548 | 13.2354  |
| SPRYD4         | 0.81826158 | 0.566804 |
| SPRYD5         | 0.01290689 | 0.014662 |
| SPSB1          | 0.05394569 | 0.091925 |
| SPSB2          | 9.69855334 | 10.55529 |
| SPSB3          | 59.4809881 | 62.24979 |
| SPSB4          | 0.00872783 | 0        |
| SPTA1          | 0.00262259 | 0.002979 |
| SPTAN1         | 14.436059  | 14.03686 |
| SPTB           | 3.07262076 | 1.703774 |
| SPTBN1         | 6.88037166 | 5.433936 |
| SPTBN2         | 0.06681496 | 0.051614 |

|          |            |          |
|----------|------------|----------|
| SPTBN4   | 0.01150308 | 0.018295 |
| SPTBN5   | 0.05739236 | 0.026487 |
| SPTLC1   | 12.270647  | 11.80796 |
| SPTLC2   | 8.0973973  | 6.705924 |
| SPTLC3   | 0.00546823 | 0        |
| SPTY2D1  | 8.20625928 | 8.068618 |
| SPZ1     | 0          | 0        |
| SQLE     | 0.59791005 | 0.575352 |
| SQRDL    | 29.4254034 | 42.65606 |
| SQSTM1   | 130.656964 | 134.156  |
| SR140    | 13.0760432 | 12.94417 |
| SRA1     | 13.1246419 | 15.47382 |
| SRBD1    | 7.71232362 | 6.970262 |
| SRC      | 1.44639863 | 1.836441 |
| SRCAP    | 31.8511482 | 35.69768 |
| SRCRB4D  | 0.00749299 | 0.034049 |
| SRD5A1   | 0.80795221 | 0.801797 |
| SRD5A2   | 0          | 0        |
| SRD5A2L2 | 0          | 0        |
| SRD5A3   | 0.12646816 | 0.089794 |
| SRD5AP1  | 0          | 0        |
| SREBF1   | 10.4635179 | 15.68333 |
| SREBF2   | 10.0439168 | 9.457527 |
| SRF      | 21.2298386 | 26.77256 |
| SRFBP1   | 0.44482365 | 0.395839 |
| SRGAP1   | 0.00496173 | 0.002818 |
| SRGAP2   | 0.62665123 | 0.470113 |
| SRGAP2P1 | 0          | 0        |
| SRGAP2P2 | 0          | 0        |
| SRGAP3   | 1.71601727 | 1.36112  |
| SRGN     | 3427.56488 | 3009.981 |
| SRI      | 31.1215042 | 25.92589 |
| SRIL     | 0          | 0        |
| SRL      | 0.0099788  | 0.005668 |
| SRM      | 1.22221091 | 1.125771 |
| SRMP1    | 0          | 0        |
| SRMP2    | 0          | 0        |
| SRMS     | 0          | 0.015755 |
| SRP14    | 78.4061854 | 76.17356 |
| SRP14P1  | 0          | 0        |
| SRP19    | 16.3741291 | 15.66281 |
| SRP54    | 20.242629  | 17.81658 |
| SRP68    | 15.7251084 | 15.75562 |
| SRP72    | 11.2449719 | 10.21095 |
| SRP9     | 26.9046365 | 26.45055 |
| SRPK1    | 40.5175147 | 27.1001  |
| SRPK2    | 24.3459768 | 21.72158 |

|        |            |          |
|--------|------------|----------|
| SRPK3  | 0.82029012 | 0.662113 |
| SRPR   | 90.5174041 | 85.55993 |
| SRPRB  | 0.77112962 | 0.930766 |
| SRPX   | 0          | 0.02578  |
| SRPX2  | 0          | 0        |
| SRR    | 0.56871101 | 0.462852 |
| SRRD   | 2.55295975 | 2.235188 |
| SRRM1  | 39.6723517 | 39.55554 |
| SRRM1L | 0          | 0        |
| SRRM2  | 276.056099 | 262.6366 |
| SRrp35 | 0.05257793 | 0.066366 |
| SRRT   | 44.7651836 | 45.28896 |
| SRXN1  | 9.8020191  | 14.87484 |
| SRY    | 0          | 0        |
| SS18   | 12.8012201 | 14.27823 |
| SS18L1 | 5.38115331 | 5.740199 |
| SS18L2 | 11.7896641 | 10.31602 |
| SSB    | 12.0930845 | 10.19079 |
| SSBP1  | 15.7689982 | 14.79508 |
| SSBP2  | 7.00484589 | 6.63339  |
| SSBP3  | 14.1899353 | 19.01416 |
| SSBP4  | 2.70070599 | 4.158342 |
| SSFA2  | 35.8896401 | 35.80736 |
| SSH1   | 27.0303285 | 33.22423 |
| SSH2   | 108.12929  | 88.12422 |
| SSH3   | 60.83701   | 68.067   |
| SSNA1  | 23.840625  | 21.93064 |
| SSPN   | 0.14227333 | 0.186879 |
| SSPO   | 0.01484459 | 0.018397 |
| SSR1   | 7.08376506 | 7.376462 |
| SSR2   | 67.2848002 | 63.17654 |
| SSR3   | 22.2948108 | 17.50068 |
| SSR4   | 20.3982018 | 20.21048 |
| SSRP1  | 6.16812654 | 6.422459 |
| SSSCA1 | 3.31132888 | 3.907808 |
| SST    | 0          | 0        |
| SSTR1  | 0.00979973 | 0.005566 |
| SSTR2  | 0          | 0.007972 |
| SSTR3  | 0.04951797 | 0.067504 |
| SSTR4  | 0          | 0.018987 |
| SSTR5  | 0.01920122 | 0.021813 |
| SSU72  | 45.9233246 | 44.26902 |
| SSX1   | 0          | 0.019062 |
| SSX10  | 0          | 0        |
| SSX2   | 0          | 0        |
| SSX2B  | 0          | 0        |
| SSX2IP | 2.6286331  | 2.464438 |

|            |            |          |
|------------|------------|----------|
| SSX3       | 0          | 0.015787 |
| SSX4       | 0          | 0        |
| SSX4B      | 0          | 0        |
| SSX5       | 0.01519171 | 0        |
| SSX6       | 0          | 0        |
| SSX7       | 0          | 0        |
| SSX8       | 0          | 0        |
| SSX9       | 0          | 0        |
| SSXP1      | 0          | 0        |
| SSXP10     | 0          | 0        |
| SSXP2      | 0          | 0        |
| SSXP3      | 0          | 0        |
| SSXP4      | 0          | 0        |
| SSXP5      | 0          | 0        |
| SSXP6      | 0          | 0        |
| SSXP7      | 0          | 0        |
| SSXP8      | 0          | 0        |
| SSXP9      | 0          | 0        |
| ST13       | 17.6044386 | 15.36539 |
| ST13P      | 0          | 0        |
| ST14       | 6.79819034 | 7.853134 |
| ST18       | 0          | 0        |
| ST20       | 22.5190224 | 24.64132 |
| ST3GAL1    | 19.5564834 | 14.75388 |
| ST3GAL2    | 56.026601  | 50.56666 |
| ST3GAL3    | 0.37759778 | 0.292471 |
| ST3GAL4    | 0.90470443 | 0.657765 |
| ST3GAL5    | 4.4146324  | 4.888252 |
| ST3GAL6    | 32.7975091 | 31.6834  |
| ST5        | 0.03128105 | 0.010153 |
| ST6GAL1    | 8.76094126 | 10.56933 |
| ST6GAL2    | 0.00297472 | 0        |
| ST6GALNAC1 | 0          | 0        |
| ST6GALNAC2 | 9.26912453 | 8.362625 |
| ST6GALNAC3 | 0.48514951 | 0.446868 |
| ST6GALNAC4 | 0.60924968 | 1.652607 |
| ST6GALNAC5 | 0          | 0.011754 |
| ST6GALNAC6 | 4.23487692 | 8.376721 |
| ST7        | 0.84473807 | 0.838737 |
| ST7L       | 0.54256026 | 0.550137 |
| ST7OT1     | 0          | 0        |
| ST7OT2     | 0          | 0        |
| ST7OT3     | 0          | 0        |
| ST7OT4     | 0          | 0        |
| ST8SIA1    | 0.00216444 | 0.002459 |
| ST8SIA2    | 0          | 0.008491 |
| ST8SIA3    | 0.00621194 | 0.004705 |



|          |            |          |
|----------|------------|----------|
| ST8SIA4  | 10.5898804 | 11.88083 |
| ST8SIA5  | 0          | 0        |
| ST8SIA6  | 0          | 0.017085 |
| STAB1    | 0.02122163 | 0.048216 |
| STAB2    | 0.00255472 | 0.005804 |
| STAC     | 0.41866167 | 0.257956 |
| STAC2    | 0.00654791 | 0.007439 |
| STAC3    | 1.97072487 | 1.613662 |
| STAG1    | 7.0776327  | 7.346775 |
| STAG2    | 33.9889325 | 30.8189  |
| STAG3    | 1.21501913 | 1.374601 |
| STAG3L1  | 23.9845369 | 21.16435 |
| STAG3L2  | 5.64364147 | 5.237963 |
| STAG3L3  | 1.95046309 | 1.858983 |
| STAG3L4  | 2.01882569 | 1.845922 |
| STAM     | 15.0991082 | 13.02165 |
| STAM2    | 9.19051478 | 10.40705 |
| STAMPB   | 8.08206546 | 6.890869 |
| STAMBPL1 | 4.92731842 | 7.570994 |
| STAP1    | 46.4060084 | 62.28149 |
| STAP2    | 0.01367946 | 0        |
| STAR     | 0.28085785 | 0.230431 |
| STARD10  | 19.0052916 | 31.86283 |
| STARD13  | 0          | 0.007511 |
| STARD3   | 52.3260445 | 56.54841 |
| STARD3NL | 10.1810972 | 7.695821 |
| STARD4   | 13.6794667 | 15.37129 |
| STARD5   | 15.9447419 | 15.64511 |
| STARD6   | 0          | 0        |
| STARD7   | 19.1184546 | 22.86902 |
| STARD8   | 0.01643888 | 0.023344 |
| STARD9   | 0.08822588 | 0.100226 |
| STARP1   | 0          | 0        |
| STAT1    | 18.355302  | 17.01091 |
| STAT2    | 27.2911266 | 24.32223 |
| STAT3    | 53.8549499 | 59.88808 |
| STAT4    | 0.2132232  | 0.224923 |
| STAT5A   | 38.6971681 | 50.18039 |
| STAT5B   | 79.8417751 | 70.44091 |
| STAT6    | 59.1182214 | 48.84472 |
| STATH    | 0          | 0        |
| STAU1    | 20.5361141 | 21.20623 |
| STAU2    | 2.21072876 | 2.245508 |
| STBD1    | 2.50281151 | 1.996106 |
| STC1     | 0.00542309 | 0        |
| STC2     | 0.00787023 | 0.008941 |
| STEAP1   | 0          | 0        |

|               |            |          |
|---------------|------------|----------|
| STEAP2        | 0.00589358 | 0.003348 |
| STEAP3        | 0.13041211 | 0.131689 |
| STEAP4        | 0.04248495 | 0.010725 |
| STELLAR       | 0          | 0        |
| STGC3         | 0          | 0        |
| STH           | 0          | 0        |
| STIL          | 0.10472869 | 0.099938 |
| STIM1         | 34.6464963 | 36.57888 |
| STIM2         | 7.23972767 | 6.635771 |
| STIP1         | 10.9090995 | 9.538851 |
| STK10         | 55.1535057 | 51.2504  |
| STK11         | 24.0096957 | 27.45767 |
| STK11IP       | 11.2687833 | 11.07033 |
| STK16         | 4.1490576  | 3.265052 |
| STK16P        | 0          | 0        |
| STK17A        | 45.1245407 | 55.76836 |
| STK17B        | 45.3746213 | 24.60072 |
| STK19         | 6.28698622 | 4.639448 |
| STK19P        | 0          | 0        |
| STK24         | 52.3951077 | 69.55564 |
| STK25         | 17.5882147 | 15.86391 |
| STK3          | 0.29759846 | 0.371884 |
| STK31         | 0.14480255 | 0.118439 |
| STK32A        | 0          | 0        |
| STK32B        | 0          | 0        |
| STK32C        | 1.22044158 | 2.062754 |
| STK33         | 0          | 0        |
| STK33P        | 0          | 0        |
| STK35         | 6.16952771 | 5.916677 |
| STK36         | 0.99957892 | 0.878343 |
| STK38         | 29.1508923 | 28.01958 |
| STK38L        | 18.439438  | 16.66991 |
| STK39         | 2.36326261 | 4.793072 |
| STK4          | 93.5429628 | 89.4739  |
| STK40         | 102.846997 | 119.2579 |
| STL           | 0          | 0        |
| STMN1         | 6.12314608 | 7.81803  |
| STMN2         | 0          | 0.03322  |
| STMN3         | 6.89034128 | 6.143398 |
| STMN4         | 0          | 0.018177 |
| STOM          | 0.9712417  | 1.087806 |
| STOML1        | 0.17997514 | 0.168374 |
| STOML2        | 5.3182691  | 4.747001 |
| STOML3        | 0.01052319 | 0        |
| STON1         | 0          | 0        |
| STON1-GTF2A1L | 0.06048082 | 0.081199 |
| STON2         | 0.02881169 | 0.016365 |

|         |            |          |
|---------|------------|----------|
| STOX1   | 0.02338096 | 0.00664  |
| STOX2   | 0          | 0        |
| STRA13  | 3.6002279  | 2.91202  |
| STRA6   | 0.00484231 | 0.005501 |
| STRA8   | 0.04234709 | 0.07216  |
| STRADA  | 13.8318543 | 14.77162 |
| STRADB  | 1.32666362 | 0.925054 |
| STRAP   | 19.5589602 | 17.6101  |
| STRBP   | 1.78214086 | 1.592837 |
| STRC    | 0.07243541 | 0.082288 |
| STRCP   | 0          | 0        |
| STRN    | 12.4737807 | 11.35555 |
| STRN3   | 5.23890293 | 4.689899 |
| STRN4   | 47.9194147 | 43.94562 |
| STS     | 0.40224092 | 0.423242 |
| STSP1   | 0          | 0        |
| STT3A   | 11.9566099 | 10.34482 |
| STT3B   | 66.5929265 | 67.41936 |
| STUB1   | 17.7311    | 16.10232 |
| STX10   | 25.3985998 | 31.14618 |
| STX11   | 21.464632  | 23.41643 |
| STX12   | 7.73683013 | 7.338523 |
| STX16   | 27.5096994 | 26.1877  |
| STX17   | 4.69326293 | 4.59861  |
| STX18   | 7.11236868 | 7.869468 |
| STX19   | 0          | 0        |
| STX1A   | 0.05027578 | 0.07996  |
| STX1B   | 0.80359223 | 0.776641 |
| STX2    | 2.88284839 | 2.922592 |
| STX3    | 51.7128806 | 36.95616 |
| STX4    | 64.2592366 | 63.64193 |
| STX5    | 30.237098  | 29.87636 |
| STX6    | 15.05054   | 17.0134  |
| STX7    | 17.7656661 | 16.8762  |
| STX8    | 3.12773518 | 4.071325 |
| STXBP1  | 0.0432954  | 0.067628 |
| STXBP2  | 162.529146 | 171.897  |
| STXBP3  | 36.8594296 | 31.31879 |
| STXBP4  | 0.06259609 | 0.055308 |
| STXBP5  | 54.0749418 | 48.6279  |
| STXBP5L | 0.0022451  | 0.007651 |
| STXBP6  | 0          | 0        |
| STYK1   | 0.00702014 | 0        |
| STYX    | 4.52919771 | 4.305702 |
| STYXL1  | 6.87480808 | 6.662866 |
| SUB1    | 22.8179098 | 24.29375 |
| SUB1P1  | 0          | 0        |

|          |            |          |
|----------|------------|----------|
| SUCLA2   | 2.68160413 | 2.483433 |
| SUCLG1   | 17.4487079 | 15.59441 |
| SUCLG2   | 1.50180935 | 1.147541 |
| SUCNR1   | 5.72339757 | 2.59401  |
| SUDS3    | 8.62269812 | 7.532297 |
| SUFU     | 4.19390534 | 4.383976 |
| SUGT1    | 8.33478965 | 6.994352 |
| SUGT1L1  | 0          | 0        |
| SUGT1P   | 0          | 0        |
| SUGT1P2  | 0          | 0        |
| SULF1    | 0.00347929 | 0        |
| SULF2    | 4.54280951 | 3.941012 |
| SULT1A1  | 1.40682783 | 1.565339 |
| SULT1A2  | 0.90366752 | 0.461961 |
| SULT1A3  | 8.70522475 | 5.58716  |
| SULT1A4  | 12.4257587 | 16.59357 |
| SULT1B1  | 0.06424853 | 0.036494 |
| SULT1C2  | 0.0145504  | 0.008265 |
| SULT1C3  | 0          | 0        |
| SULT1C4  | 0          | 0.014354 |
| SULT1D1P | 0          | 0        |
| SULT1E1  | 0.04724793 | 0.013419 |
| SULT2A1  | 0          | 0        |
| SULT2B1  | 0.01496465 | 0        |
| SULT4A1  | 0.00852955 | 0        |
| SULT6B1  | 0          | 0        |
| SUMF1    | 1.50740269 | 1.356603 |
| SUMF2    | 7.67721432 | 6.767835 |
| SUMO1    | 17.7482984 | 16.43959 |
| SUMO1P1  | 0          | 0        |
| SUMO1P2  | 0          | 0        |
| SUMO1P3  | 0          | 0        |
| SUMO1P4  | 0          | 0        |
| SUMO2    | 107.039842 | 110.2166 |
| SUMO2P   | 0          | 0        |
| SUMO3    | 30.4733491 | 30.54703 |
| SUMO4    | 0          | 0        |
| SUNC1    | 0.01463141 | 0        |
| SUOX     | 10.9482024 | 9.536581 |
| SUPT16H  | 20.1006473 | 19.14786 |
| SUPT16HP | 0          | 0        |
| SUPT3H   | 0.89769098 | 0.999795 |
| SUPT4H1  | 54.3778036 | 51.21904 |
| SUPT4H1P | 0          | 0        |
| SUPT5H   | 35.5963743 | 35.30923 |
| SUPT6H   | 55.6489745 | 52.00914 |
| SUPT7L   | 10.1499896 | 9.305159 |

|          |            |          |
|----------|------------|----------|
| SUPV3L1  | 2.86400022 | 2.346031 |
| SURF1    | 20.4981771 | 17.87352 |
| SURF2    | 3.73672944 | 3.537487 |
| SURF4    | 47.4326934 | 62.05784 |
| SURF6    | 13.1759951 | 16.29795 |
| SURF6P1  | 0          | 0        |
| SUSD1    | 75.9396216 | 84.06825 |
| SUSD2    | 0.28403683 | 0.285151 |
| SUSD2P1  | 0          | 0        |
| SUSD2P2  | 0          | 0        |
| SUSD3    | 61.9805555 | 77.11478 |
| SUSD4    | 0.00653366 | 0        |
| SUSD5    | 0.00840173 | 0.014317 |
| SUV39H1  | 2.11793627 | 1.837316 |
| SUV39H2  | 0.49038673 | 0.580299 |
| SUV420H1 | 10.0199689 | 8.639644 |
| SUV420H2 | 4.14314664 | 4.479105 |
| SUZ12    | 16.6530765 | 16.73078 |
| SUZ12P   | 0          | 0        |
| SV2A     | 0.00952234 | 0.005409 |
| SV2B     | 0          | 0        |
| SV2C     | 0.00890149 | 0.020224 |
| SVEP1    | 0.0408788  | 0.038699 |
| SVIL     | 22.5234504 | 24.27914 |
| SVIP     | 16.6961411 | 15.04642 |
| SVOP     | 0.01348642 | 0        |
| SVOPL    | 0.21961588 | 0.236356 |
| SWAP70   | 123.380701 | 128.1213 |
| SYAP1    | 22.9272764 | 24.10944 |
| SYCE1    | 0          | 0        |
| SYCE2    | 0.65352047 | 1.177615 |
| SYCN     | 0          | 0        |
| SYCP1    | 0          | 0.006842 |
| SYCP2    | 2.19461484 | 2.645668 |
| SYCP2L   | 11.9031586 | 10.26373 |
| SYCP3    | 1.06813179 | 0.979247 |
| SYDE1    | 0          | 0.01468  |
| SYDE2    | 0.04016726 | 0.02535  |
| SYF2     | 35.7679097 | 34.90694 |
| SYF2P    | 0          | 0        |
| SYK      | 72.2120245 | 87.01105 |
| SYMPK    | 15.216757  | 14.64588 |
| SYN1     | 0.05894953 | 0.022323 |
| SYN2     | 0          | 0.00421  |
| SYN3     | 0.0334266  | 0.007595 |
| SYNC     | 0.07223131 | 0.164112 |
| SYNCRIP  | 13.2448111 | 11.49451 |

|             |            |          |
|-------------|------------|----------|
| SYNE1       | 57.7403588 | 53.48228 |
| SYNE2       | 36.7907886 | 33.34841 |
| SYNGAP1     | 0.95506079 | 0.727284 |
| SYNGR1      | 0.07457183 | 0.053504 |
| SYNGR2      | 28.3357914 | 34.91118 |
| SYNGR2P1    | 0          | 0        |
| SYNGR2P2    | 0          | 0        |
| SYNGR3      | 0.04144964 | 0.047087 |
| SYNGR4      | 0          | 0.023672 |
| SYNJ1       | 22.0310446 | 19.83593 |
| SYNJ2       | 0.03120411 | 0.038993 |
| SYNJ2BP     | 0.0387152  | 0.050747 |
| SYNM        | 0.04574453 | 0.058462 |
| SYNPO       | 0.03684676 | 0.019319 |
| SYNPO2      | 0.01983234 | 0.012131 |
| SYNPO2L     | 0.00417169 | 0.004739 |
| SYNPR       | 0          | 0.007996 |
| SYP         | 0.08641731 | 0.166891 |
| SYPL1       | 15.0512754 | 13.94266 |
| SYPL2       | 0          | 0.012641 |
| SYS1        | 9.73436329 | 10.98224 |
| SYS1-DBNDD2 | 0          | 0        |
| SYT1        | 0          | 0.004484 |
| SYT10       | 0          | 0        |
| SYT11       | 0.13215922 | 0.131937 |
| SYT12       | 0          | 0        |
| SYT13       | 0.00407705 | 0.013895 |
| SYT14       | 0          | 0.004788 |
| SYT14L      | 0          | 0        |
| SYT15       | 0.15830445 | 0.194034 |
| SYT16       | 0.00670237 | 0        |
| SYT17       | 0.01099651 | 0        |
| SYT2        | 0.06215715 | 0.039911 |
| SYT3        | 0          | 0.008197 |
| SYT4        | 0          | 0        |
| SYT5        | 0.02304146 | 0.013088 |
| SYT6        | 0.03849031 | 0.021863 |
| SYT7        | 0.01391792 | 0.015811 |
| SYT8        | 0.04432607 | 0.016785 |
| SYT9        | 0.01594842 | 0.006039 |
| SYTL1       | 80.8001918 | 88.90848 |
| SYTL2       | 0.04142339 | 0.040335 |
| SYTL3       | 1.3943017  | 1.206319 |
| SYTL4       | 0.00519144 | 0        |
| SYTL5       | 0.00958747 | 0        |
| SYVN1       | 33.5054602 | 37.63216 |
| T           | 0.02505004 | 0.018971 |

|         |            |          |
|---------|------------|----------|
| TAAR1   | 0          | 0        |
| TAAR2   | 0.01991035 | 0        |
| TAAR3   | 0          | 0        |
| TAAR4P  | 0          | 0        |
| TAAR5   | 0          | 0.020824 |
| TAAR6   | 0.02025562 | 0.023011 |
| TAAR7P  | 0          | 0        |
| TAAR8   | 0          | 0        |
| TAAR9   | 0          | 0        |
| TAB3P1  | 0          | 0        |
| TAC1    | 0          | 0.020105 |
| TAC3    | 0          | 0        |
| TAC4    | 0.46722958 | 0.353853 |
| TACC1   | 60.4053824 | 55.97786 |
| TACC2   | 0.00208254 | 0        |
| TACC3   | 73.3958695 | 97.33547 |
| TACR1   | 0.01263288 | 0.009567 |
| TACR2   | 0.13053806 | 0.128521 |
| TACR3   | 0.01199391 | 0        |
| TACSTD2 | 0.96399925 | 0.887622 |
| TADA1L  | 1.98193427 | 2.166546 |
| TADA2B  | 33.0934418 | 31.25781 |
| TADA2L  | 2.74664928 | 3.14471  |
| TADA3L  | 44.9326805 | 42.29575 |
| TAF1    | 11.2944186 | 9.858973 |
| TAF10   | 69.8912905 | 67.89389 |
| TAF11   | 23.5626344 | 21.53243 |
| TAF12   | 16.0986511 | 17.0702  |
| TAF13   | 7.76151732 | 8.030695 |
| TAF13P  | 0          | 0        |
| TAF15   | 28.2192348 | 24.12906 |
| TAF1A   | 1.23086025 | 0.78812  |
| TAF1B   | 2.19490188 | 1.828525 |
| TAF1C   | 10.3465632 | 9.465175 |
| TAF1D   | 68.981613  | 68.94923 |
| TAF1L   | 0.01691227 | 0.026898 |
| TAF2    | 6.75574877 | 6.294821 |
| TAF2GL  | 0          | 0        |
| TAF3    | 4.44621694 | 4.254803 |
| TAF4    | 4.70207812 | 5.873218 |
| TAF4B   | 0.01327636 | 0.035192 |
| TAF5    | 4.27197667 | 3.873656 |
| TAF5L   | 4.31632223 | 4.138837 |
| TAF6    | 9.0502335  | 7.915313 |
| TAF6L   | 1.35580011 | 1.303255 |
| TAF7    | 76.9921052 | 74.33004 |
| TAF7L   | 0          | 0        |

|         |            |          |
|---------|------------|----------|
| TAF8    | 6.12326895 | 4.525076 |
| TAF9    | 15.403439  | 14.19694 |
| TAF9B   | 1.49343184 | 1.465617 |
| TAF9P1  | 0          | 0        |
| TAF9P2  | 0          | 0        |
| TAGAP   | 20.8189112 | 27.67055 |
| TAGLN   | 8.88546421 | 9.940624 |
| TAGLN2  | 576.202287 | 602.7302 |
| TAGLN3  | 0.04002284 | 0.015156 |
| tAKR    | 0          | 0        |
| TAL1    | 0.01681354 | 0.023876 |
| TAL2    | 0          | 0.03641  |
| TALDO1  | 303.065853 | 258.3742 |
| TALDOP1 | 0          | 0        |
| TANC1   | 0.00280076 | 0.006363 |
| TANC2   | 1.29942881 | 1.124412 |
| TANK    | 14.4635793 | 11.61184 |
| TAOK1   | 11.5499512 | 9.888087 |
| TAOK2   | 14.9296299 | 14.60806 |
| TAOK3   | 42.9570916 | 39.89206 |
| TAP1    | 98.7093705 | 93.21827 |
| TAP2    | 20.4353257 | 17.49638 |
| TAPBP   | 52.0669809 | 51.55421 |
| TAPBPL  | 15.0346151 | 13.17754 |
| TAPT1   | 17.2537862 | 18.79885 |
| TARBP1  | 1.75416017 | 1.606309 |
| TARBP2  | 1.48065711 | 1.309596 |
| TARBP2P | 0          | 0        |
| TARDBP  | 28.0454083 | 27.0343  |
| TARDBPL | 0          | 0        |
| TARP    | 1.45355258 | 0.697715 |
| TARS    | 6.24120351 | 5.799472 |
| TARS2   | 8.27761979 | 7.155497 |
| TARSL2  | 1.6914732  | 1.870783 |
| TAS1R1  | 0.11685067 | 0.22124  |
| TAS1R2  | 0.00834008 | 0        |
| TAS1R3  | 0.2793518  | 0.308014 |
| TAS2R1  | 0          | 0        |
| TAS2R10 | 0.06826406 | 0        |
| TAS2R12 | 0          | 0        |
| TAS2R13 | 0          | 0        |
| TAS2R14 | 0          | 0        |
| TAS2R15 | 0          | 0        |
| TAS2R16 | 0          | 0        |
| TAS2R18 | 0          | 0        |
| TAS2R19 | 0          | 0        |
| TAS2R2  | 0          | 0        |



|          |            |          |
|----------|------------|----------|
| TAS2R20  | 0          | 0        |
| TAS2R3   | 0.03819315 | 0        |
| TAS2R30  | 0          | 0        |
| TAS2R31  | 0          | 0        |
| TAS2R38  | 0.01839487 | 0.062691 |
| TAS2R39  | 0          | 0        |
| TAS2R4   | 0.21025331 | 0.079617 |
| TAS2R40  | 0          | 0        |
| TAS2R41  | 0          | 0        |
| TAS2R42  | 0.02224903 | 0.025275 |
| TAS2R43  | 0          | 0        |
| TAS2R46  | 0          | 0        |
| TAS2R5   | 0.16454607 | 0.249236 |
| TAS2R50  | 0          | 0        |
| TAS2R60  | 0.02197004 | 0.124792 |
| TAS2R62P | 0          | 0        |
| TAS2R63P | 0          | 0        |
| TAS2R64P | 0          | 0        |
| TAS2R7   | 0          | 0        |
| TAS2R8   | 0          | 0        |
| TAS2R9   | 0          | 0.022219 |
| TASP1    | 0.66179264 | 0.792445 |
| TAT      | 0          | 0        |
| TATDN1   | 1.17272762 | 0.904018 |
| TATDN2   | 40.8971759 | 43.46621 |
| TATDN3   | 7.61658999 | 6.268081 |
| TAX1BP1  | 50.1671919 | 48.81769 |
| TAX1BP3  | 29.292351  | 29.55804 |
| TAZ      | 23.0230133 | 24.19856 |
| TBC1D1   | 12.8525098 | 11.44285 |
| TBC1D10A | 15.7364176 | 16.24829 |
| TBC1D10B | 25.0794854 | 24.36456 |
| TBC1D10C | 83.7930345 | 84.12322 |
| TBC1D12  | 0.01462886 | 0.016619 |
| TBC1D13  | 14.6727432 | 14.29781 |
| TBC1D14  | 20.2097448 | 20.87392 |
| TBC1D15  | 7.82718707 | 7.455726 |
| TBC1D16  | 0.19354401 | 0.513028 |
| TBC1D17  | 19.518784  | 16.45801 |
| TBC1D19  | 0.10517446 | 0.184651 |
| TBC1D2   | 12.8104293 | 19.29099 |
| TBC1D20  | 14.3298766 | 13.65782 |
| TBC1D21  | 0.0174195  | 0        |
| TBC1D22A | 4.1639169  | 3.962301 |
| TBC1D22B | 4.77958852 | 4.26372  |
| TBC1D23  | 11.9007134 | 11.63472 |
| TBC1D24  | 0.2953812  | 0.330057 |

|          |            |          |
|----------|------------|----------|
| TBC1D25  | 7.13162459 | 6.516399 |
| TBC1D26  | 0          | 0        |
| TBC1D27  | 0.1239214  | 0.023463 |
| TBC1D28  | 0.02125918 | 0        |
| TBC1D29  | 0.06276218 | 0        |
| TBC1D2B  | 27.4885323 | 34.84541 |
| TBC1D3   | 5.94729535 | 4.165646 |
| TBC1D30  | 0.03541108 | 0.025142 |
| TBC1D3B  | 0.58679968 | 0.949077 |
| TBC1D3C  | 1.55447945 | 1.199915 |
| TBC1D3D  | 0.99425643 | 1.181303 |
| TBC1D3E  | 0.74797273 | 0.94297  |
| TBC1D3F  | 1.27395365 | 1.701944 |
| TBC1D3G  | 0.85331688 | 0.856663 |
| TBC1D3P1 | 0          | 0        |
| TBC1D4   | 0.02643449 | 0.026276 |
| TBC1D5   | 7.70217705 | 7.960764 |
| TBC1D7   | 4.11329546 | 4.579686 |
| TBC1D8   | 5.35393043 | 2.81645  |
| TBC1D8B  | 0.00333629 | 0        |
| TBC1D9   | 0.09581358 | 0.026123 |
| TBC1D9B  | 24.7500508 | 41.05094 |
| TBCA     | 8.51541387 | 7.140909 |
| TBCAP1   | 0          | 0        |
| TBCAP2   | 0          | 0        |
| TBCAP3   | 0          | 0        |
| TBCB     | 13.5274841 | 11.28673 |
| TBCC     | 30.8184742 | 28.35543 |
| TBCCD1   | 1.93566539 | 1.50135  |
| TBCD     | 4.45934366 | 5.179059 |
| TBCE     | 2.99594859 | 2.500739 |
| TBCEL    | 1.15506644 | 0.910247 |
| TBCKL    | 0.5780378  | 0.454611 |
| TBK1     | 24.719923  | 26.76061 |
| TBKBP1   | 4.0738486  | 4.206183 |
| TBL1X    | 33.7041156 | 30.50134 |
| TBL1XR1  | 12.066293  | 12.63176 |
| TBL1Y    | 0.0786157  | 0.099232 |
| TBL1YP1  | 0          | 0        |
| TBL2     | 5.95982745 | 6.291343 |
| TBL3     | 5.69807543 | 5.764101 |
| TBP      | 11.1277077 | 10.81688 |
| TBPL1    | 9.97866352 | 11.17294 |
| TBPL2    | 0          | 0.018416 |
| TBR1     | 0          | 0.014994 |
| TBRG1    | 22.2554065 | 22.73296 |
| TBRG4    | 6.34409185 | 6.547943 |

|          |            |          |
|----------|------------|----------|
| TBX1     | 2.32783123 | 3.392723 |
| TBX10    | 0.01358226 | 0        |
| TBX15    | 0          | 0.006834 |
| TBX18    | 0          | 0        |
| TBX19    | 1.77322068 | 1.743562 |
| TBX2     | 0.00622051 | 0        |
| TBX20    | 0          | 0        |
| TBX21    | 0.0326988  | 0.046433 |
| TBX22    | 0.00883417 | 0        |
| TBX3     | 0          | 0.004994 |
| TBX4     | 0.00851228 | 0.00967  |
| TBX5     | 0.0096646  | 0        |
| TBX6     | 0.32651651 | 0.397423 |
| TBXA2R   | 0.01731905 | 0.009837 |
| TBXAS1   | 104.755566 | 92.83627 |
| TC2N     | 0.05152296 | 0.027014 |
| TCAM1    | 0          | 0        |
| TCAP     | 1.48465473 | 2.157845 |
| TCEA1    | 8.11636831 | 8.016176 |
| TCEA1P   | 0          | 0        |
| TCEA1P2  | 0          | 0        |
| TCEA2    | 2.03757968 | 2.173211 |
| TCEA3    | 0          | 0        |
| TCEAL1   | 0.130897   | 0.074351 |
| TCEAL2   | 0          | 0        |
| TCEAL3   | 0.85970242 | 0.849248 |
| TCEAL4   | 0.07804503 | 0.212785 |
| TCEAL5   | 0.05400342 | 0.02045  |
| TCEAL6   | 0.02744821 | 0.046772 |
| TCEAL7   | 0          | 0        |
| TCEAL8   | 1.33576773 | 1.280967 |
| TCEANC   | 2.10791042 | 1.72266  |
| TCEB1    | 13.9954875 | 13.09123 |
| TCEB1P   | 0          | 0        |
| TCEB1P10 | 0          | 0        |
| TCEB1P11 | 0          | 0        |
| TCEB1P12 | 0          | 0        |
| TCEB1P13 | 0          | 0        |
| TCEB1P14 | 0          | 0        |
| TCEB1P15 | 0          | 0        |
| TCEB1P16 | 0          | 0        |
| TCEB1P17 | 0          | 0        |
| TCEB1P2  | 0          | 0        |
| TCEB1P3  | 0          | 0        |
| TCEB1P4  | 0          | 0        |
| TCEB1P5  | 0          | 0        |
| TCEB1P6  | 0          | 0        |

|          |            |          |
|----------|------------|----------|
| TCEB1P7  | 0          | 0        |
| TCEB1P8  | 0          | 0        |
| TCEB1P9  | 0          | 0        |
| TCEB2    | 125.812182 | 126.8806 |
| TCEB3    | 7.01411506 | 6.924411 |
| TCEB3B   | 0          | 0        |
| TCEB3C   | 0          | 0.012725 |
| TCEB3CL  | 0          | 0        |
| TCERG1   | 6.17597201 | 5.497953 |
| TCERG1L  | 0.0241024  | 0.018254 |
| TCF12    | 4.06239125 | 4.139374 |
| TCF15    | 0.03427112 | 0        |
| TCF19    | 1.15747436 | 1.011469 |
| TCF20    | 12.2229074 | 11.71199 |
| TCF21    | 0.00575248 | 0.006535 |
| TCF23    | 0          | 0        |
| TCF25    | 108.449383 | 110.0682 |
| TCF3     | 4.66579675 | 5.54065  |
| TCF4     | 0.19935203 | 0.177734 |
| TCF7     | 45.8176353 | 79.61112 |
| TCF7L1   | 0.5254429  | 0.813184 |
| TCF7L2   | 0.06371312 | 0.117616 |
| TCFL5    | 4.17767162 | 6.156056 |
| TCHH     | 0.0060943  | 0.003462 |
| TCHHL1   | 0          | 0        |
| TCHP     | 6.27583897 | 6.126422 |
| TCIRG1   | 202.02419  | 225.2714 |
| TCL1A    | 0.13555013 | 0.205316 |
| TCL1B    | 0          | 0        |
| TCL6     | 0.00561499 | 0.003189 |
| TCN1     | 0.01341757 | 0        |
| TCN2     | 0.3396318  | 0.301427 |
| TCOF1    | 3.19500859 | 2.832746 |
| TCP1     | 29.8880265 | 27.16651 |
| TCP10    | 0          | 0        |
| TCP10L   | 0          | 0.008856 |
| TCP10L2  | 0          | 0        |
| TCP11    | 0.00984793 | 0        |
| TCP11L1  | 2.68319278 | 1.444696 |
| TCP11L2  | 12.1281765 | 10.93613 |
| TCP1P1   | 0          | 0        |
| TCP1P2   | 0          | 0        |
| TCTA     | 4.22073481 | 2.836843 |
| TCTE1    | 0.02556271 | 0.043559 |
| TCTE1P   | 0          | 0        |
| TCTE3    | 0.50663448 | 0.447646 |
| TCTEX1D1 | 1.91139372 | 1.849247 |

|          |            |          |
|----------|------------|----------|
| TCTEX1D2 | 0          | 0.11007  |
| TCTEX1D4 | 0.24833068 | 0.921551 |
| TCTN1    | 0.05143183 | 0.163597 |
| TCTN2    | 0.60691677 | 0.500684 |
| TCTN3    | 0.94418244 | 0.619147 |
| TD1      | 0          | 0        |
| TDG      | 9.26177495 | 8.40102  |
| TDFG1    | 0.01020647 | 0.011595 |
| TDFG2    | 0          | 0        |
| TDFG3    | 0          | 0        |
| TDFG4    | 0          | 0        |
| TDFG5    | 0          | 0        |
| TDH      | 0          | 0        |
| TDO2     | 0          | 0        |
| TDP1     | 2.19399637 | 1.810347 |
| TDPX2    | 0          | 0        |
| TDRD1    | 0          | 0        |
| TDRD10   | 0.1330191  | 0.056667 |
| TDRD12   | 0          | 0.014771 |
| TDRD3    | 0.87072016 | 0.833991 |
| TDRD5    | 0          | 0        |
| TDRD6    | 0          | 0        |
| TDRD7    | 8.95978503 | 8.54762  |
| TDRD9    | 0.01765722 | 0.015044 |
| TDRG1    | 0          | 0        |
| TDRKH    | 0.14171485 | 0.109766 |
| TEAD1    | 0.00222939 | 0.01013  |
| TEAD2    | 0.08744361 | 0.121412 |
| TEAD3    | 0.0210886  | 0.015971 |
| TEAD4    | 0.0108996  | 0        |
| TEC      | 2.83435401 | 2.005821 |
| TECPR1   | 3.46492064 | 3.296572 |
| TECPR2   | 1.99089633 | 1.434716 |
| TECTA    | 0.02275469 | 0.003693 |
| TECTB    | 0          | 0        |
| TEDDM1   | 0.00841013 | 0.038216 |
| TEF      | 2.69708682 | 2.22357  |
| TEK      | 0          | 0        |
| TEKT1    | 0          | 0        |
| TEKT2    | 0.05573315 | 0.094971 |
| TEKT3    | 0.04958804 | 0        |
| TEKT4    | 0.0433512  | 0.032832 |
| TEKT4P1  | 0          | 0        |
| TEKT5    | 0.01306733 | 0        |
| TELO2    | 2.28156835 | 2.239458 |
| TENC1    | 0.3315533  | 0.385836 |
| TEP1     | 3.32197783 | 3.048513 |

|         |            |          |
|---------|------------|----------|
| TEPP    | 0          | 0.014708 |
| TERC    | 0          | 0        |
| TERF1   | 5.93823537 | 5.527466 |
| TERF1P  | 0          | 0        |
| TERF2   | 7.82827195 | 7.681478 |
| TERF2IP | 47.8534943 | 47.14939 |
| TERT    | 0          | 0.005945 |
| TES     | 72.8210908 | 87.97482 |
| TESC    | 36.3352383 | 49.97356 |
| TESK1   | 3.76049242 | 4.357419 |
| TESK2   | 3.75940573 | 3.53307  |
| TESSP1  | 13.4017261 | 9.509119 |
| TESSP2  | 0          | 0.054161 |
| TESSP5  | 0          | 0        |
| TET1    | 0.0438759  | 0.044859 |
| TET2    | 14.2270565 | 12.30228 |
| TET3    | 14.9970357 | 14.67946 |
| TEX10   | 2.03717658 | 2.290569 |
| TEX101  | 0.01209047 | 0.013735 |
| TEX11   | 0          | 0.007607 |
| TEX12   | 0.07351514 | 0.250543 |
| TEX13A  | 0          | 0        |
| TEX13B  | 0          | 0        |
| TEX14   | 0.02987159 | 0.019391 |
| TEX15   | 0.00207925 | 0        |
| TEX19   | 0          | 0.012551 |
| TEX2    | 2.20993164 | 2.341585 |
| TEX261  | 17.5034163 | 16.15987 |
| TEX264  | 6.4351154  | 5.322775 |
| TEX28   | 0.0137871  | 0.031325 |
| TEX28P1 | 0          | 0        |
| TEX28P2 | 0          | 0        |
| TEX9    | 0.0148694  | 0        |
| TF      | 0.02721139 | 0.082434 |
| TFAM    | 2.35666158 | 1.949301 |
| TFAMP1  | 0          | 0        |
| TFAMP2  | 0          | 0        |
| TFAP2A  | 0.00988962 | 0        |
| TFAP2B  | 0.0036439  | 0        |
| TFAP2C  | 0.00733612 | 0        |
| TFAP2D  | 0.01030653 | 0.011708 |
| TFAP2E  | 0.95089437 | 0.676508 |
| TFAP4   | 0.53054573 | 0.491096 |
| TFB1M   | 1.96345503 | 1.524186 |
| TFB2M   | 1.3302701  | 1.069882 |
| TFCP2   | 7.03799021 | 5.790024 |
| TFCP2L1 | 0.22639529 | 0.254617 |

|          |            |          |
|----------|------------|----------|
| TFDP1    | 148.501809 | 152.3385 |
| TFDP2    | 18.5285729 | 11.81193 |
| TFDP3    | 0.05006031 | 0.028435 |
| TFE3     | 33.022101  | 35.72559 |
| TFEB     | 27.8849122 | 36.70027 |
| TFEC     | 0.0348784  | 0.003602 |
| TFF1     | 0          | 0        |
| TFF2     | 0.0296968  | 0        |
| TFF3     | 5.5710832  | 7.508792 |
| TFG      | 9.86821089 | 9.483121 |
| TFIP11   | 23.8770755 | 21.57575 |
| TFPI     | 0.01015226 | 0.0173   |
| TFPI2    | 0          | 0        |
| TFPT     | 5.12983179 | 4.261659 |
| TFR2     | 1.36868498 | 1.091702 |
| TFRC     | 25.0596532 | 32.45127 |
| TG       | 0.09949287 | 0.093246 |
| TGDS     | 3.59265645 | 3.428304 |
| TGFA     | 18.2443069 | 23.59383 |
| TGFB1    | 246.630896 | 368.6818 |
| TGFB111  | 0.07994422 | 0.116766 |
| TGFB2    | 0.0120397  | 0.004559 |
| TGFB3    | 0.23119277 | 0.217615 |
| TGFBI    | 0.10493926 | 0.119213 |
| TGFBR1   | 14.1673388 | 7.790788 |
| TGFBR2   | 135.502537 | 102.6593 |
| TGFBR3   | 0.04586392 | 0.029773 |
| TGFBRAP1 | 7.12376056 | 7.844069 |
| TGIF1    | 22.5724385 | 32.79947 |
| TGIF1P1  | 0          | 0        |
| TGIF2    | 6.14833518 | 6.157113 |
| TGIF2LX  | 0          | 0.0282   |
| TGIF2LY  | 0          | 0        |
| TGIF2P1  | 0          | 0        |
| TGM1     | 0.6586978  | 0.421451 |
| TGM2     | 0.31388771 | 0.257206 |
| TGM3     | 0.03141626 | 0.008922 |
| TGM4     | 0.08412937 | 0.039822 |
| TGM5     | 0.05773546 | 0.054657 |
| TGM6     | 0          | 0        |
| TGM7     | 0          | 0.030993 |
| TGOLN2   | 77.8696235 | 83.88907 |
| TGS1     | 6.98186776 | 6.16536  |
| TH       | 0.01100803 | 0.025011 |
| TH1L     | 8.00210868 | 5.852222 |
| THA1P    | 0          | 0        |
| THADA    | 2.17548751 | 1.982337 |

|         |            |          |
|---------|------------|----------|
| THAP1   | 3.77427492 | 3.40586  |
| THAP10  | 0          | 0        |
| THAP11  | 0.03344432 | 0.037993 |
| THAP2   | 0.23588961 | 0.202245 |
| THAP3   | 1.65989455 | 1.850747 |
| THAP4   | 8.52509944 | 8.278991 |
| THAP5   | 6.18527218 | 5.630388 |
| THAP6   | 3.02628436 | 2.663543 |
| THAP7   | 5.58644059 | 5.000103 |
| THAP8   | 0.31105969 | 0.327193 |
| THAP9   | 0.51027301 | 0.485037 |
| THBD    | 0.07300462 | 0.118478 |
| THBS1   | 85.3722851 | 13.242   |
| THBS2   | 0.01085832 | 0.012335 |
| THBS3   | 3.14678452 | 2.823407 |
| THBS4   | 7.55783879 | 5.958819 |
| THEG    | 0          | 0.018067 |
| THEM4   | 0.75294703 | 0.725432 |
| THEM5   | 0.01913133 | 0.021733 |
| THG1L   | 0.56389777 | 0.274541 |
| THNSL1  | 0.01115402 | 0.006336 |
| THNSL2  | 0.30861044 | 0.305349 |
| THOC1   | 6.79356213 | 6.196609 |
| THOC2   | 9.58695127 | 8.651434 |
| THOC3   | 4.63523434 | 4.246532 |
| THOC4   | 18.9382577 | 19.88962 |
| THOC5   | 14.6352794 | 12.40222 |
| THOC6   | 1.76198196 | 1.429742 |
| THOC7   | 9.78261927 | 9.549305 |
| THOP1   | 1.0059178  | 0.946038 |
| THPO    | 0.01164838 | 0        |
| THRA    | 3.52151595 | 3.860517 |
| THRAP3  | 41.481384  | 40.03666 |
| THRB    | 0.00820768 | 0.009324 |
| THRSP   | 0.03581828 | 0.020345 |
| THSD1   | 0.16955912 | 0.164085 |
| THSD1P  | 0          | 0        |
| THSD4   | 0.00459821 | 0.002612 |
| THSD7A  | 0.00324615 | 0.003688 |
| THSD7B  | 0          | 0        |
| THTPA   | 2.47525487 | 2.019377 |
| THUMPD1 | 55.3438512 | 56.13758 |
| THUMPD2 | 0.29262059 | 0.233926 |
| THUMPD3 | 7.61772041 | 8.947914 |
| THY1    | 0.00877152 | 0        |
| THYN1   | 44.1038547 | 34.37214 |
| TIA1    | 20.6457634 | 19.1471  |



|          |            |          |
|----------|------------|----------|
| TIAF1    | 0          | 0.011434 |
| TIAL1    | 22.7636667 | 21.62563 |
| TIAM1    | 0.02628897 | 0.029865 |
| TIAM2    | 4.09444317 | 6.785363 |
| TICAM1   | 2.08464251 | 1.502208 |
| TICAM2   | 4.34906735 | 4.017131 |
| TIE1     | 0.03249665 | 0.018458 |
| TIFA     | 0.62945996 | 0.901618 |
| TIFAB    | 0.03303273 | 0.018763 |
| TIGD1    | 1.36561586 | 0.790316 |
| TIGD2    | 0.40336366 | 0.515506 |
| TIGD3    | 5.58752444 | 4.575552 |
| TIGD4    | 0.02592519 | 0.029451 |
| TIGD5    | 0.36218547 | 0.400898 |
| TIGD6    | 0.22271321 | 0.184626 |
| TIGD7    | 2.74990705 | 2.287169 |
| TIGIT    | 0.01965903 | 0.022333 |
| TIMD4    | 0          | 0        |
| TIMELESS | 0.5033312  | 0.409087 |
| TIMM10   | 3.08829045 | 3.508347 |
| TIMM13   | 2.99901193 | 3.431348 |
| TIMM17A  | 9.94869488 | 8.523198 |
| TIMM17B  | 27.9894174 | 28.09272 |
| TIMM22   | 2.97340479 | 2.275445 |
| TIMM23   | 0          | 0.187481 |
| TIMM44   | 1.55104901 | 1.318249 |
| TIMM50   | 1.95375354 | 1.903751 |
| TIMM8A   | 1.29830517 | 1.024233 |
| TIMM8AP  | 0          | 0        |
| TIMM8B   | 18.3844681 | 15.75033 |
| TIMM9    | 1.09222499 | 0.620392 |
| TIMP1    | 1.83627345 | 2.372866 |
| TIMP2    | 150.65757  | 167.7316 |
| TIMP3    | 0.01149763 | 0        |
| TIMP4    | 0          | 0        |
| TINAG    | 0          | 0        |
| TINAGL1  | 0.01879779 | 0.032032 |
| TINF2    | 34.3989467 | 29.19048 |
| TINP1    | 11.2173188 | 8.913646 |
| TIPARP   | 88.7711836 | 86.05738 |
| TIPIN    | 0.06570416 | 0.335884 |
| TIPRL    | 7.6461685  | 7.187786 |
| TIRAP    | 3.25744564 | 3.066137 |
| TJAP1    | 9.32999061 | 9.316949 |
| TJP1     | 0.0058689  | 0        |
| TJP2     | 0.21011628 | 0.16086  |
| TJP3     | 0.02941634 | 0.008354 |

|           |            |          |
|-----------|------------|----------|
| TK1       | 0.23727646 | 0.314475 |
| TK2       | 9.08523145 | 8.338665 |
| TKT       | 182.322154 | 195.23   |
| TKTL1     | 7.36513582 | 4.615572 |
| TKTL2     | 0.06755729 | 0.051164 |
| TLCD1     | 0.06263753 | 0.023719 |
| TLCD2     | 0.25499299 | 0.210674 |
| TLE1      | 3.90406115 | 3.70442  |
| TLE2      | 0.0648041  | 0.073618 |
| TLE3      | 36.4699372 | 38.29413 |
| TLE4      | 44.0925152 | 35.69433 |
| TLE6      | 0.50035493 | 0.343415 |
| TLK1      | 9.56218566 | 10.99726 |
| TLK2      | 11.6219063 | 10.61219 |
| TLK2P1    | 0          | 0        |
| TLK2P2    | 0          | 0        |
| TLL1      | 0.0031598  | 0.00359  |
| TLL2      | 0.00311348 | 0.003537 |
| TLN1      | 113.794556 | 104.8379 |
| TLN2      | 0.00180475 | 0.008201 |
| TLR1      | 8.3039364  | 11.22625 |
| TLR10     | 0.37440767 | 0.285771 |
| TLR2      | 0.12356939 | 0.105283 |
| TLR3      | 0          | 0.007854 |
| TLR4      | 16.3613004 | 12.13058 |
| TLR5      | 0          | 0.013923 |
| TLR6      | 2.40573166 | 3.053962 |
| TLR7      | 1.97954839 | 2.688989 |
| TLR7-like | 0          | 0        |
| TLR8      | 0.04007688 | 0.028455 |
| TLR9      | 1.86444895 | 2.581173 |
| TLX1      | 0          | 0.011336 |
| TLX2      | 0.02400152 | 0        |
| TLX3      | 0          | 0.015998 |
| TM2D1     | 14.1626629 | 12.43936 |
| TM2D2     | 3.59757792 | 4.539548 |
| TM2D3     | 20.7414068 | 19.47137 |
| TM4SF1    | 0.01243367 | 0        |
| TM4SF18   | 0.01823533 | 0        |
| TM4SF19   | 0.06159765 | 0.139952 |
| TM4SF20   | 0.00915737 | 0.052015 |
| TM4SF4    | 0          | 0        |
| TM4SF5    | 0.11878718 | 0        |
| TM6SF1    | 125.171758 | 178.8943 |
| TM6SF2    | 0          | 0        |
| TM7SF2    | 0.83518023 | 0.587339 |
| TM7SF3    | 11.4850749 | 10.99726 |

|          |            |          |
|----------|------------|----------|
| TM7SF4   | 0          | 0        |
| TM9SF1   | 8.57204029 | 7.915864 |
| TM9SF2   | 98.4115742 | 112.387  |
| TM9SF3   | 31.5003289 | 40.74473 |
| TM9SF4   | 10.7399378 | 9.390727 |
| TMBIM1   | 110.9715   | 179.9162 |
| TMBIM4   | 38.531003  | 37.95838 |
| TMBIM6   | 152.038955 | 156.3706 |
| TMC1     | 0.00656836 | 0.007462 |
| TMC2     | 0          | 0        |
| TMC3     | 0.17823472 | 0.137395 |
| TMC4     | 0.1525417  | 0.134781 |
| TMC5     | 0.02683759 | 0.026133 |
| TMC6     | 87.1932843 | 107.4911 |
| TMC7     | 0.02360408 | 0.013407 |
| TMC8     | 56.8145456 | 62.88286 |
| TMCC1    | 2.77675108 | 2.862756 |
| TMCC2    | 3.49313252 | 4.006047 |
| TMCC3    | 17.3495738 | 11.96089 |
| TMCO1    | 7.44824477 | 7.091395 |
| TMCO2    | 0.02837427 | 0        |
| TMCO3    | 17.5710721 | 15.86665 |
| TMCO4    | 0.26157944 | 0.36944  |
| TMCO5A   | 0          | 0        |
| TMCO6    | 3.01633917 | 2.971414 |
| TMCO7    | 0.89023817 | 0.748579 |
| TMED1    | 11.1866536 | 12.58501 |
| TMED10   | 19.2546166 | 20.55364 |
| TMED10P  | 0          | 0        |
| TMED2    | 46.2240813 | 46.89391 |
| TMED3    | 22.9339705 | 18.17196 |
| TMED4    | 33.4512604 | 31.22359 |
| TMED5    | 29.8987964 | 28.99774 |
| TMED6    | 0.34810151 | 0.579992 |
| TMED7    | 0.53695977 | 0.546454 |
| TMED8    | 5.35307506 | 4.029696 |
| TMED9    | 39.5612147 | 37.80389 |
| TMEFF1   | 0.0644102  | 0.094077 |
| TMEFF2   | 0          | 0.026349 |
| TMEM100  | 0          | 0        |
| TMEM101  | 2.13122263 | 1.645108 |
| TMEM102  | 6.15947354 | 5.738237 |
| TMEM104  | 8.64212382 | 9.983563 |
| TMEM105  | 0.00633866 | 0.007201 |
| TMEM106A | 5.98037142 | 5.135939 |
| TMEM106B | 2.65318116 | 1.925036 |
| TMEM106C | 3.00551016 | 2.40656  |

|          |            |          |
|----------|------------|----------|
| TMEM107  | 2.68735931 | 1.93663  |
| TMEM108  | 0.00554612 | 0.0063   |
| TMEM109  | 8.48761267 | 7.62163  |
| TMEM11   | 7.54562379 | 6.946529 |
| TMEM110  | 8.94042907 | 7.946567 |
| TMEM111  | 32.5697951 | 33.19588 |
| TMEM114  | 0          | 0        |
| TMEM115  | 11.0495892 | 10.61434 |
| TMEM116  | 0.69839386 | 0.612439 |
| TMEM117  | 0.00779582 | 0.017712 |
| TMEM119  | 0.32693962 | 0.415624 |
| TMEM120A | 85.3019546 | 82.79414 |
| TMEM120B | 2.77724745 | 4.25543  |
| TMEM121  | 0.01384156 | 0.031448 |
| TMEM123  | 127.118331 | 111.8276 |
| TMEM125  | 0          | 0        |
| TMEM126A | 3.12773518 | 3.25706  |
| TMEM126B | 13.5350568 | 12.04918 |
| TMEM127  | 55.1265391 | 60.70609 |
| TMEM128  | 5.7419062  | 4.90941  |
| TMEM129  | 12.4729052 | 17.75597 |
| TMEM130  | 0.01371963 | 0        |
| TMEM131  | 29.617109  | 20.8761  |
| TMEM132A | 0.00597311 | 0.006786 |
| TMEM132B | 0          | 0.003152 |
| TMEM132C | 0          | 0.004924 |
| TMEM132D | 0.01091847 | 0.004135 |
| TMEM132E | 0.01443717 | 0.005467 |
| TMEM133  | 0.02265661 | 0        |
| TMEM134  | 12.6790499 | 11.89074 |
| TMEM135  | 0.315643   | 0.391777 |
| TMEM136  | 0          | 0        |
| TMEM138  | 9.77080785 | 10.07203 |
| TMEM139  | 0.01779546 | 0.010108 |
| TMEM140  | 30.7745767 | 27.05557 |
| TMEM141  | 2.64654516 | 2.67246  |
| TMEM143  | 1.30882452 | 1.157615 |
| TMEM144  | 0.0126735  | 0.021596 |
| TMEM145  | 0          | 0.013426 |
| TMEM146  | 0.02509988 | 0        |
| TMEM147  | 13.1933334 | 13.21961 |
| TMEM148  | 0          | 0        |
| TMEM149  | 39.3258072 | 34.80915 |
| TMEM14A  | 0.53857991 | 0.258853 |
| TMEM14B  | 19.943781  | 17.37322 |
| TMEM14C  | 17.7314337 | 20.36187 |
| TMEM14D  | 0.04550937 | 0.051699 |

|            |            |          |
|------------|------------|----------|
| TMEM14E    | 0          | 0        |
| TMEM150    | 4.66025377 | 4.986324 |
| TMEM151A   | 0          | 0.009441 |
| TMEM151B   | 0.00910385 | 0        |
| TMEM154    | 79.7395048 | 61.52835 |
| TMEM155    | 0          | 0        |
| TMEM156    | 18.9877323 | 16.81369 |
| TMEM158    | 0.02262004 | 0.012848 |
| TMEM159    | 1.85225779 | 1.553096 |
| TMEM160    | 12.6151986 | 12.61717 |
| TMEM161A   | 0.87457813 | 0.617603 |
| TMEM161B   | 5.03343505 | 4.290848 |
| TMEM163    | 0.01110688 | 0.012618 |
| TMEM164    | 20.6073962 | 16.32514 |
| TMEM165    | 14.8193809 | 15.37642 |
| TMEM167A   | 18.2111989 | 17.20624 |
| TMEM167AP1 | 0          | 0        |
| TMEM167B   | 33.7781499 | 30.91167 |
| TMEM168    | 3.40045216 | 2.877578 |
| TMEM169    | 0.01214986 | 0        |
| TMEM17     | 0.0218445  | 0.012408 |
| TMEM170A   | 8.78700152 | 8.021791 |
| TMEM170B   | 19.9039129 | 20.7745  |
| TMEM171    | 0.01683373 | 0.019123 |
| TMEM173    | 0.12455765 | 0.282999 |
| TMEM174    | 0          | 0        |
| TMEM175    | 14.7995561 | 15.22288 |
| TMEM176A   | 3.54473306 | 2.922359 |
| TMEM176B   | 2.4634584  | 1.861346 |
| TMEM177    | 0.084682   | 0.013743 |
| TMEM178    | 0          | 0.014644 |
| TMEM179    | 0          | 0        |
| TMEM179B   | 27.1132024 | 26.67896 |
| TMEM18     | 2.38564254 | 1.945444 |
| TMEM180    | 2.47793244 | 3.430219 |
| TMEM181    | 29.3739106 | 29.27995 |
| TMEM182    | 0.05273912 | 0.046599 |
| TMEM183A   | 39.9765414 | 37.0004  |
| TMEM183B   | 0.40670335 | 0.392018 |
| TMEM184A   | 0.08375291 | 0.07231  |
| TMEM184B   | 43.7680921 | 41.76398 |
| TMEM184C   | 8.78470131 | 8.213266 |
| TMEM185A   | 2.66086663 | 3.158642 |
| TMEM185B   | 0          | 0        |
| TMEM186    | 3.55746277 | 3.08461  |
| TMEM187    | 1.12252817 | 0.945661 |
| TMEM188    | 8.50237513 | 7.904752 |

|               |            |          |
|---------------|------------|----------|
| TMEM189       | 2.45151321 | 2.162438 |
| TMEM189-UBE2' | 20.4262976 | 21.34789 |
| TMEM19        | 0.83938862 | 0.594693 |
| TMEM190       | 0          | 0        |
| TMEM191A      | 0          | 0        |
| TMEM191B      | 0.50867736 | 0.525332 |
| TMEM191C      | 0.63060612 | 0.611543 |
| TMEM192       | 0.83727124 | 0.733291 |
| TMEM194A      | 3.84048239 | 3.261506 |
| TMEM194B      | 0.47981921 | 0.426872 |
| TMEM195       | 0          | 0        |
| TMEM196       | 0          | 0        |
| TMEM198       | 0.02843823 | 0.043075 |
| TMEM199       | 11.2019017 | 10.1046  |
| TMEM2         | 14.09532   | 7.704165 |
| TMEM20        | 0.27998776 | 0.437347 |
| TMEM200A      | 0.00418581 | 0        |
| TMEM200B      | 0.02563023 | 0        |
| TMEM201       | 0.14755769 | 0.070776 |
| TMEM202       | 0.01622325 | 0        |
| TMEM203       | 10.748981  | 10.6156  |
| TMEM204       | 0          | 0.050658 |
| TMEM205       | 6.26700985 | 6.953426 |
| TMEM206       | 4.20077968 | 2.946074 |
| TMEM207       | 0          | 0        |
| TMEM208       | 9.45345485 | 9.776651 |
| TMEM209       | 1.55391727 | 1.455341 |
| TMEM211       | 0          | 0        |
| TMEM213       | 0.00620216 | 0        |
| TMEM214       | 16.9862542 | 16.82957 |
| TMEM215       | 0.00390588 | 0        |
| TMEM216       | 22.5589433 | 26.50779 |
| TMEM217       | 0          | 0.061798 |
| TMEM218       | 1.26911456 | 1.010349 |
| TMEM219       | 39.377772  | 36.67643 |
| TMEM22        | 0.03061941 | 0.023189 |
| TMEM220       | 1.9379752  | 2.093423 |
| TMEM221       | 0          | 0        |
| TMEM222       | 20.934143  | 24.0479  |
| TMEM223       | 1.81755796 | 3.90013  |
| TMEM224       | 0          | 0        |
| TMEM225       | 0          | 0        |
| TMEM25        | 0.0349258  | 0.039676 |
| TMEM26        | 0          | 0        |
| TMEM27        | 0          | 0        |
| TMEM30A       | 28.5396658 | 26.84447 |
| TMEM30B       | 0.00473224 | 0        |

|         |            |          |
|---------|------------|----------|
| TMEM30C | 0          | 0        |
| TMEM31  | 0.05744626 | 0        |
| TMEM33  | 5.34828621 | 5.156485 |
| TMEM35  | 0          | 0        |
| TMEM37  | 0          | 0        |
| TMEM38A | 1.26998643 | 1.136692 |
| TMEM38B | 3.53460525 | 3.348057 |
| TMEM39A | 8.61775486 | 7.835156 |
| TMEM39B | 5.8519348  | 5.412907 |
| TMEM40  | 0.01229552 | 0.013968 |
| TMEM41A | 1.13047411 | 0.954728 |
| TMEM41B | 14.1419611 | 17.47655 |
| TMEM42  | 0.88595948 | 0.760985 |
| TMEM43  | 27.1215445 | 26.44372 |
| TMEM44  | 0.95039876 | 1.049111 |
| TMEM45A | 0          | 0        |
| TMEM45B | 0.09526657 | 0.032467 |
| TMEM47  | 0.00518632 | 0.005892 |
| TMEM48  | 1.0675297  | 0.710584 |
| TMEM49  | 12.3678417 | 13.30365 |
| TMEM5   | 0.9128848  | 1.234585 |
| TMEM50A | 40.5290919 | 45.76932 |
| TMEM50B | 28.6258258 | 27.98204 |
| TMEM51  | 0          | 0.010673 |
| TMEM52  | 0.06584133 | 0.149594 |
| TMEM53  | 0.15768998 | 0.134354 |
| TMEM54  | 0.02117355 | 0        |
| TMEM55A | 2.76143166 | 1.479169 |
| TMEM55B | 30.3603816 | 26.46314 |
| TMEM56  | 0.07704973 | 0.066523 |
| TMEM57  | 11.1957219 | 10.21482 |
| TMEM59  | 73.8985836 | 70.30334 |
| TMEM59L | 0.01298662 | 0.014753 |
| TMEM60  | 18.7855191 | 12.31191 |
| TMEM61  | 0          | 0        |
| TMEM62  | 3.63710131 | 3.260589 |
| TMEM63A | 9.03149955 | 9.034598 |
| TMEM63B | 5.98094754 | 5.435561 |
| TMEM63C | 0.00778428 | 0        |
| TMEM64  | 1.34380617 | 0.991289 |
| TMEM65  | 4.76938666 | 4.946719 |
| TMEM66  | 304.181344 | 306.6403 |
| TMEM67  | 0.13411219 | 0.078634 |
| TMEM68  | 2.00543726 | 1.628764 |
| TMEM69  | 5.13126704 | 5.130996 |
| TMEM70  | 2.00584126 | 1.96316  |
| TMEM71  | 24.3673658 | 17.37505 |

|            |            |          |
|------------|------------|----------|
| TMEM72     | 0          | 0        |
| TMEM74     | 0          | 0        |
| TMEM77     | 9.39785472 | 9.118387 |
| TMEM79     | 2.56010391 | 2.365722 |
| TMEM8      | 45.2251648 | 69.35567 |
| TMEM80     | 5.89434725 | 5.445157 |
| TMEM81     | 2.2256544  | 1.990426 |
| TMEM82     | 0          | 0        |
| TMEM84     | 0          | 0        |
| TMEM85     | 21.9376309 | 21.16158 |
| TMEM86A    | 0.1291338  | 0.106689 |
| TMEM86B    | 8.05906958 | 8.674909 |
| TMEM87A    | 11.4655376 | 10.36002 |
| TMEM87B    | 3.09813012 | 2.896276 |
| TMEM88     | 1.44338656 | 2.37758  |
| TMEM88B    | 0.07180782 | 0.03263  |
| TMEM89     | 0.17521109 | 0.099521 |
| TMEM9      | 1.28419825 | 0.993273 |
| TMEM90A    | 0.02419486 | 0.018324 |
| TMEM91     | 0.8711338  | 0.72125  |
| TMEM92     | 0          | 0        |
| TMEM93     | 13.4209917 | 12.48815 |
| TMEM95     | 0          | 0        |
| TMEM97     | 0.06549947 | 0.111613 |
| TMEM98     | 0          | 0        |
| TMEM99     | 0.1221811  | 0.115666 |
| TMEM9B     | 28.401588  | 30.97025 |
| TMF1       | 18.4120648 | 17.55533 |
| TMIE       | 0          | 0        |
| TMIGD1     | 0          | 0        |
| TMIGD2     | 0.04998098 | 0.056779 |
| TMLHE      | 2.06939335 | 1.65648  |
| TMOD1      | 0.25255653 | 0.197249 |
| TMOD2      | 9.36595409 | 9.157779 |
| TMOD3      | 21.7886268 | 21.38511 |
| TMOD4      | 1.59041838 | 1.626066 |
| TMPO       | 5.76746415 | 6.308867 |
| TMPPE      | 0.00529472 | 0        |
| TMPRSS11A  | 0          | 0        |
| TMPRSS11B  | 0          | 0.00903  |
| TMPRSS11D  | 0          | 0        |
| TMPRSS11E  | 0          | 0        |
| TMPRSS11E2 | 0          | 0        |
| TMPRSS11F  | 0          | 0        |
| TMPRSS12   | 0.01435176 | 0        |
| TMPRSS13   | 0.04340233 | 0.056349 |
| TMPRSS2    | 0.01312443 | 0        |



|           |            |          |
|-----------|------------|----------|
| TMPRSS3   | 0.00800355 | 0        |
| TMPRSS4   | 0          | 0        |
| TMPRSS5   | 0.20930194 | 0.205347 |
| TMPRSS6   | 0.02635579 | 0.01497  |
| TMPRSS7   | 0          | 0        |
| TMPRSS9   | 0.13884653 | 0.105155 |
| TMSB10    | 448.075103 | 410.705  |
| TMSB15A   | 0          | 0        |
| TMSB15B   | 0.06313913 | 0.143454 |
| TMSB4X    | 7135.17503 | 6070.159 |
| TMSB4Y    | 0.66767079 | 0.715552 |
| TMSL1     | 0          | 0        |
| TMSL2     | 0          | 0        |
| TMSL3     | 0.5637707  | 0.791147 |
| TMSL4     | 0          | 0        |
| TMSL5     | 0          | 0        |
| TMSL6     | 0          | 0        |
| TMSL7     | 0          | 0        |
| TMTC1     | 0.01668488 | 0.008123 |
| TMTC2     | 0          | 0        |
| TMTC3     | 2.84015647 | 2.380884 |
| TMTC4     | 0.49846949 | 0.388117 |
| TMUB1     | 25.8108647 | 29.32155 |
| TMUB2     | 34.7285306 | 29.18353 |
| TMX1      | 5.82500032 | 4.859665 |
| TMX2      | 23.2438311 | 22.99729 |
| TMX3      | 9.19885924 | 9.543976 |
| TMX4      | 27.3648944 | 24.53065 |
| TNC       | 0.00276685 | 0.006286 |
| TNF       | 0          | 0        |
| TNFAIP1   | 5.15559441 | 4.80963  |
| TNFAIP2   | 136.390189 | 141.3484 |
| TNFAIP3   | 14.4169632 | 19.68689 |
| TNFAIP6   | 0.08865213 | 0.016785 |
| TNFAIP8   | 13.632863  | 9.401354 |
| TNFAIP8L1 | 36.0516649 | 52.31352 |
| TNFAIP8L2 | 26.0228629 | 24.95974 |
| TNFAIP8L3 | 0          | 0.010573 |
| TNFRSF10A | 2.30060672 | 2.34798  |
| TNFRSF10B | 6.31164846 | 4.86442  |
| TNFRSF10C | 20.6160419 | 15.68806 |
| TNFRSF10D | 0.71373118 | 0.783783 |
| TNFRSF11A | 0.03362977 | 0.045845 |
| TNFRSF11B | 0          | 0        |
| TNFRSF12A | 19.3766845 | 26.15107 |
| TNFRSF13B | 0.13934314 | 0.017588 |
| TNFRSF13C | 0.27013273 | 0.306875 |

|                |            |          |
|----------------|------------|----------|
| TNFRSF14       | 42.1861503 | 39.08091 |
| TNFRSF17       | 0          | 0        |
| TNFRSF18       | 0.1927322  | 0.298564 |
| TNFRSF19       | 0.09873255 | 0.042728 |
| TNFRSF1A       | 49.8922327 | 64.69787 |
| TNFRSF1B       | 108.759603 | 116.3254 |
| TNFRSF21       | 0.10992881 | 0.046009 |
| TNFRSF25       | 0.10973555 | 0.174526 |
| TNFRSF4        | 0.43310607 | 0.357829 |
| TNFRSF6B       | 0.77318959 | 0.508522 |
| TNFRSF8        | 0.27013273 | 0.389987 |
| TNFRSF9        | 0.01115994 | 0.063389 |
| TNFSF10        | 1.49412528 | 0.719676 |
| TNFSF11        | 0.02313018 | 0        |
| TNFSF12        | 38.7284776 | 39.99808 |
| TNFSF12-TNFSF1 | 9.18056141 | 10.49477 |
| TNFSF13        | 13.5057267 | 10.76719 |
| TNFSF13B       | 5.55320203 | 3.630378 |
| TNFSF14        | 24.6714241 | 50.39726 |
| TNFSF15        | 0.03147505 | 0.011919 |
| TNFSF18        | 0.02810873 | 0.031932 |
| TNFSF4         | 0.12038552 | 0.10257  |
| TNFSF8         | 0.04249688 | 0.012069 |
| TNFSF9         | 0          | 0.014345 |
| TNIK           | 8.76441668 | 7.429363 |
| TNIP1          | 78.8771596 | 78.64253 |
| TNIP2          | 14.8766187 | 14.00716 |
| TNIP3          | 0.02422273 | 0.009172 |
| TNK1           | 0.00741634 | 0.067401 |
| TNK2           | 50.7050828 | 79.1759  |
| TNKS           | 5.06193769 | 4.541132 |
| TNKS1BP1       | 1.36195013 | 1.63338  |
| TNKS2          | 24.1553372 | 23.03996 |
| TNMD           | 0          | 0        |
| TNN            | 0.01259505 | 0.004769 |
| TNNC1          | 0.15104404 | 0.068635 |
| TNNC2          | 0.12313517 | 0.209825 |
| TNNI1          | 0          | 0        |
| TNNI2          | 11.0533168 | 13.23917 |
| TNNI3          | 0.74823242 | 1.020005 |
| TNNI3K         | 0.38170988 | 0.355433 |
| TNNT1          | 21.9080739 | 21.69716 |
| TNNT2          | 0          | 0        |
| TNNT3          | 9.20372749 | 10.41817 |
| TNP1           | 0          | 0        |
| TNP2           | 0          | 0        |
| TNPO1          | 16.6768444 | 18.93419 |

|          |            |          |
|----------|------------|----------|
| TNPO2    | 9.004796   | 7.333762 |
| TNPO3    | 13.9080072 | 12.50567 |
| TNR      | 0.19445393 | 0.151871 |
| TNRC18   | 51.204994  | 61.80487 |
| TNRC18B  | 0          | 0        |
| TNRC18C  | 0          | 0        |
| TNRC4    | 0.01275422 | 0.007244 |
| TNRC6A   | 9.85242566 | 9.913611 |
| TNRC6B   | 8.45939277 | 7.993079 |
| TNRC6C   | 15.3884784 | 18.63918 |
| TNS1     | 0.01023031 | 0.023244 |
| TNS3     | 0.03032367 | 0.015658 |
| TNS4     | 0.01032678 | 0        |
| TNXA     | 0          | 0        |
| TNXB     | 0.04981948 | 0.049736 |
| TOB1     | 20.5657609 | 28.19226 |
| TOB2     | 9.83792047 | 8.48667  |
| TOE1     | 5.32665157 | 6.360708 |
| TOLLIP   | 19.5901946 | 18.29159 |
| TOM1     | 16.3502273 | 17.54063 |
| TOM1L1   | 0          | 0        |
| TOM1L2   | 4.0580916  | 3.849253 |
| TOMM20   | 9.65911278 | 9.111178 |
| TOMM20L  | 0.06893551 | 0.078312 |
| TOMM22   | 3.86023856 | 4.107961 |
| TOMM22P1 | 0          | 0        |
| TOMM22P2 | 0          | 0        |
| TOMM34   | 2.89367659 | 2.296421 |
| TOMM40   | 1.01509644 | 1.033873 |
| TOMM40L  | 0.96532875 | 0.936147 |
| TOMM5    | 2.73537933 | 2.791424 |
| TOMM6    | 18.2432907 | 14.18004 |
| TOMM7    | 40.0317687 | 36.20445 |
| TOMM70A  | 2.65227799 | 1.983121 |
| TOP      | 0          | 0        |
| TOP1     | 34.2970784 | 33.49289 |
| TOP1MT   | 6.93505681 | 8.265999 |
| TOP1P1   | 0          | 0        |
| TOP1P2   | 0          | 0        |
| TOP2A    | 0.06641909 | 0.058686 |
| TOP2B    | 50.2476641 | 47.25008 |
| TOP3A    | 17.7867353 | 15.63906 |
| TOP3B    | 11.2671954 | 10.20133 |
| TOP3B2   | 0          | 0        |
| TOPBP1   | 26.031924  | 23.21493 |
| TOPORS   | 8.80955285 | 7.48569  |
| TOR1A    | 38.2868681 | 47.55473 |

|          |            |          |
|----------|------------|----------|
| TOR1AIP1 | 35.1305832 | 33.7792  |
| TOR1AIP2 | 5.10831551 | 4.035598 |
| TOR1B    | 34.8372042 | 38.54051 |
| TOR2A    | 23.2292616 | 23.47576 |
| TOR3A    | 4.85047654 | 5.184103 |
| TOX      | 0.8041642  | 1.185293 |
| TOX2     | 17.2309506 | 19.07597 |
| TOX3     | 0          | 0        |
| TOX4     | 21.6388022 | 20.8282  |
| TP53     | 2.59284155 | 2.255281 |
| TP53AIP1 | 0.00790723 | 0.008983 |
| TP53BP1  | 7.52889447 | 7.068579 |
| TP53BP2  | 9.89582292 | 9.471251 |
| TP53I11  | 0.21325034 | 0.242256 |
| TP53I13  | 31.1834743 | 46.04418 |
| TP53I3   | 5.723911   | 4.86258  |
| TP53INP1 | 98.1591309 | 71.83704 |
| TP53INP2 | 16.1462714 | 14.53725 |
| TP53RK   | 9.05092812 | 8.724119 |
| TP53TG1  | 0          | 0        |
| TP53TG3  | 0.02067388 | 0        |
| TP53TG5  | 0.1285953  | 0.121739 |
| TP63     | 0.00322277 | 0.007322 |
| TP73     | 0.03371605 | 0.084264 |
| TPBG     | 0          | 0.020105 |
| TPCN1    | 5.22292801 | 4.710054 |
| TPCN2    | 5.82317165 | 4.842604 |
| TPD52    | 0.72565716 | 0.473341 |
| TPD52L1  | 0          | 0        |
| TPD52L2  | 23.6927237 | 24.33073 |
| TPD52L3  | 0          | 0        |
| TPH1     | 0.06299725 | 0.035783 |
| TPH2     | 0.00890904 | 0        |
| TPI1     | 126.565599 | 120.5219 |
| TPK1     | 0.30171652 | 0.479857 |
| TPM1     | 1.33055826 | 2.096186 |
| TPM2     | 0.41409483 | 0.34902  |
| TPM3     | 67.6237387 | 59.80572 |
| TPM3L2   | 0          | 0        |
| TPM4     | 11.1673003 | 13.70431 |
| TPM5P    | 0          | 0        |
| TPMT     | 0.98980789 | 0.823118 |
| TPMTP1   | 0          | 0        |
| TPO      | 0.01337489 | 0.007597 |
| TPP1     | 46.3116687 | 42.74711 |
| TPP2     | 24.4216962 | 24.90419 |
| TPPP     | 0.03142278 | 0.027764 |

|          |            |          |
|----------|------------|----------|
| TPPP2    | 0          | 0        |
| TPPP3    | 0.81723901 | 0.780697 |
| TPR      | 20.3864277 | 17.44144 |
| TPRG1    | 0.01149868 | 0        |
| TPRG1L   | 25.6062206 | 26.6199  |
| TPRKB    | 7.94041754 | 7.559383 |
| TPRX1    | 0          | 0        |
| TPRX1P1  | 0          | 0        |
| TPRX1P2  | 0          | 0        |
| TPRX2P   | 0          | 0        |
| TPRXL    | 0          | 0        |
| TPSAB1   | 0.10565493 | 0.160034 |
| TPSB2    | 0.41473637 | 0.655509 |
| TPSD1    | 0.12295515 | 0.363165 |
| TPSG1    | 0          | 0        |
| TPSP1    | 0          | 0        |
| TPST1    | 4.24402097 | 4.844566 |
| TPST2    | 4.71170067 | 5.720915 |
| TPT1     | 860.237847 | 855.4845 |
| TPTE     | 0.35554719 | 0.392991 |
| TPTE2    | 0.4776269  | 0.454005 |
| TPTE2P4  | 0          | 0        |
| TPX2     | 0.17224466 | 0.110881 |
| TR2IT1   | 0.03708171 | 0.063188 |
| TRA@     | 0          | 0        |
| TRA2A    | 36.1005275 | 33.17448 |
| TRA2B    | 13.879659  | 12.17083 |
| TRABD    | 302.964575 | 355.9758 |
| TRAC     | 0          | 0        |
| TRADD    | 13.8656599 | 14.02827 |
| TRAF1    | 0.7750403  | 0.805297 |
| TRAF2    | 3.48113736 | 3.639935 |
| TRAF3    | 6.62621455 | 6.541189 |
| TRAF3IP1 | 0.6696286  | 0.623438 |
| TRAF3IP2 | 2.44294322 | 2.420358 |
| TRAF3IP3 | 90.3435382 | 74.87018 |
| TRAF4    | 2.0286329  | 3.03708  |
| TRAF5    | 0.56121971 | 0.904168 |
| TRAF6    | 8.23369604 | 7.627646 |
| TRAF7    | 21.7305711 | 21.62491 |
| TRAFD1   | 36.415688  | 27.70943 |
| TRAIP    | 0.58172852 | 0.37763  |
| TRAJ1    | 0          | 0        |
| TRAJ10   | 0          | 0        |
| TRAJ11   | 0          | 0        |
| TRAJ12   | 0          | 0        |
| TRAJ13   | 0          | 0        |

|        |   |   |
|--------|---|---|
| TRAJ14 | 0 | 0 |
| TRAJ15 | 0 | 0 |
| TRAJ16 | 0 | 0 |
| TRAJ17 | 0 | 0 |
| TRAJ18 | 0 | 0 |
| TRAJ19 | 0 | 0 |
| TRAJ2  | 0 | 0 |
| TRAJ20 | 0 | 0 |
| TRAJ21 | 0 | 0 |
| TRAJ22 | 0 | 0 |
| TRAJ23 | 0 | 0 |
| TRAJ24 | 0 | 0 |
| TRAJ25 | 0 | 0 |
| TRAJ26 | 0 | 0 |
| TRAJ27 | 0 | 0 |
| TRAJ28 | 0 | 0 |
| TRAJ29 | 0 | 0 |
| TRAJ3  | 0 | 0 |
| TRAJ30 | 0 | 0 |
| TRAJ31 | 0 | 0 |
| TRAJ32 | 0 | 0 |
| TRAJ33 | 0 | 0 |
| TRAJ34 | 0 | 0 |
| TRAJ35 | 0 | 0 |
| TRAJ36 | 0 | 0 |
| TRAJ37 | 0 | 0 |
| TRAJ38 | 0 | 0 |
| TRAJ39 | 0 | 0 |
| TRAJ4  | 0 | 0 |
| TRAJ40 | 0 | 0 |
| TRAJ41 | 0 | 0 |
| TRAJ42 | 0 | 0 |
| TRAJ43 | 0 | 0 |
| TRAJ44 | 0 | 0 |
| TRAJ45 | 0 | 0 |
| TRAJ46 | 0 | 0 |
| TRAJ47 | 0 | 0 |
| TRAJ48 | 0 | 0 |
| TRAJ49 | 0 | 0 |
| TRAJ5  | 0 | 0 |
| TRAJ50 | 0 | 0 |
| TRAJ51 | 0 | 0 |
| TRAJ52 | 0 | 0 |
| TRAJ53 | 0 | 0 |
| TRAJ54 | 0 | 0 |
| TRAJ55 | 0 | 0 |
| TRAJ56 | 0 | 0 |

|            |            |          |
|------------|------------|----------|
| TRAJ57     | 0          | 0        |
| TRAJ58     | 0          | 0        |
| TRAJ59     | 0          | 0        |
| TRAJ6      | 0          | 0        |
| TRAJ60     | 0          | 0        |
| TRAJ61     | 0          | 0        |
| TRAJ7      | 0          | 0        |
| TRAJ8      | 0          | 0        |
| TRAJ9      | 0          | 0        |
| TRAK1      | 4.58762962 | 4.363768 |
| TRAK2      | 4.81260065 | 3.944867 |
| TRAM1      | 28.6318419 | 29.07492 |
| TRAM1L1    | 0.01037263 | 0.011783 |
| TRAM2      | 2.07661268 | 2.000298 |
| TRAP1      | 4.02924461 | 5.087029 |
| TRAPPC1    | 56.3095177 | 51.15713 |
| TRAPPC10   | 56.3762425 | 69.91792 |
| TRAPPC2    | 3.83070212 | 3.399796 |
| TRAPPC2L   | 4.01119192 | 4.670697 |
| TRAPPC2P1  | 0          | 0        |
| TRAPPC2P10 | 0          | 0        |
| TRAPPC2P2  | 0          | 0        |
| TRAPPC2P3  | 0          | 0        |
| TRAPPC2P4  | 0          | 0        |
| TRAPPC2P5  | 0          | 0        |
| TRAPPC2P7  | 0          | 0        |
| TRAPPC2P8  | 0          | 0        |
| TRAPPC2P9  | 0          | 0        |
| TRAPPC3    | 20.97535   | 16.76879 |
| TRAPPC4    | 22.1642031 | 19.84455 |
| TRAPPC5    | 16.7707934 | 21.9462  |
| TRAPPC6A   | 3.01495312 | 3.064505 |
| TRAPPC6B   | 9.74405819 | 8.417879 |
| TRAPPC9    | 5.59954588 | 5.661497 |
| TRAT1      | 0.07442595 | 0.112732 |
| TRAV10     | 0          | 0        |
| TRAV11     | 0          | 0        |
| TRAV1-1    | 0          | 0        |
| TRAV1-2    | 0          | 0        |
| TRAV12-1   | 0          | 0        |
| TRAV12-2   | 0          | 0        |
| TRAV12-3   | 0          | 0        |
| TRAV13-1   | 0          | 0        |
| TRAV13-2   | 0          | 0        |
| TRAV14DV4  | 0          | 0        |
| TRAV15     | 0          | 0        |
| TRAV16     | 0          | 0        |

|             |   |   |
|-------------|---|---|
| TRAV17      | 0 | 0 |
| TRAV18      | 0 | 0 |
| TRAV19      | 0 | 0 |
| TRAV2       | 0 | 0 |
| TRAV20      | 0 | 0 |
| TRAV21      | 0 | 0 |
| TRAV22      | 0 | 0 |
| TRAV23DV6   | 0 | 0 |
| TRAV24      | 0 | 0 |
| TRAV25      | 0 | 0 |
| TRAV26-1    | 0 | 0 |
| TRAV26-2    | 0 | 0 |
| TRAV27      | 0 | 0 |
| TRAV28      | 0 | 0 |
| TRAV29DV5   | 0 | 0 |
| TRAV3       | 0 | 0 |
| TRAV30      | 0 | 0 |
| TRAV31      | 0 | 0 |
| TRAV32      | 0 | 0 |
| TRAV33      | 0 | 0 |
| TRAV34      | 0 | 0 |
| TRAV35      | 0 | 0 |
| TRAV36DV7   | 0 | 0 |
| TRAV37      | 0 | 0 |
| TRAV38-1    | 0 | 0 |
| TRAV38-2DV8 | 0 | 0 |
| TRAV39      | 0 | 0 |
| TRAV4       | 0 | 0 |
| TRAV40      | 0 | 0 |
| TRAV41      | 0 | 0 |
| TRAV5       | 0 | 0 |
| TRAV6       | 0 | 0 |
| TRAV7       | 0 | 0 |
| TRAV8-1     | 0 | 0 |
| TRAV8-2     | 0 | 0 |
| TRAV8-3     | 0 | 0 |
| TRAV8-4     | 0 | 0 |
| TRAV8-5     | 0 | 0 |
| TRAV8-6     | 0 | 0 |
| TRAV8-7     | 0 | 0 |
| TRAV9-1     | 0 | 0 |
| TRAV9-2     | 0 | 0 |
| TRBV1       | 0 | 0 |
| TRBV10-2    | 0 | 0 |
| TRBV11-1    | 0 | 0 |
| TRBV11-2    | 0 | 0 |
| TRBV12-1    | 0 | 0 |



|             |   |   |
|-------------|---|---|
| TRBV19      | 0 | 0 |
| TRBV2       | 0 | 0 |
| TRBV20-1    | 0 | 0 |
| TRBV20OR9-2 | 0 | 0 |
| TRBV21OR9-2 | 0 | 0 |
| TRBV22OR9-2 | 0 | 0 |
| TRBV23OR9-2 | 0 | 0 |
| TRBV24OR9-2 | 0 | 0 |
| TRBV25OR9-2 | 0 | 0 |
| TRBV26OR9-2 | 0 | 0 |
| TRBV28      | 0 | 0 |
| TRBV29OR9-2 | 0 | 0 |
| TRBV30      | 0 | 0 |
| TRBV3-1     | 0 | 0 |
| TRBV4-1     | 0 | 0 |
| TRBV4-2     | 0 | 0 |
| TRBV5-1     | 0 | 0 |
| TRBV5-2     | 0 | 0 |
| TRBV5-3     | 0 | 0 |
| TRBV5-4     | 0 | 0 |
| TRBV5-5     | 0 | 0 |
| TRBV5-6     | 0 | 0 |
| TRBV5-7     | 0 | 0 |
| TRBV6-1     | 0 | 0 |
| TRBV6-4     | 0 | 0 |
| TRBV6-5     | 0 | 0 |
| TRBV6-6     | 0 | 0 |
| TRBV6-7     | 0 | 0 |
| TRBV6-8     | 0 | 0 |
| TRBV6-9     | 0 | 0 |
| TRBV7-1     | 0 | 0 |
| TRBV7-3     | 0 | 0 |
| TRBV7-4     | 0 | 0 |
| TRBV7-5     | 0 | 0 |
| TRBV7-6     | 0 | 0 |
| TRBV7-7     | 0 | 0 |
| TRBV7-8     | 0 | 0 |
| TRBV9       | 0 | 0 |
| TRBVAOR9-2  | 0 | 0 |
| TRBVB       | 0 | 0 |
| TRD@        | 0 | 0 |
| TRDC        | 0 | 0 |
| TRDD1       | 0 | 0 |
| TRDD2       | 0 | 0 |
| TRDD3       | 0 | 0 |
| TRDJ1       | 0 | 0 |
| TRDJ2       | 0 | 0 |

|         |            |          |
|---------|------------|----------|
| TRDJ3   | 0          | 0        |
| TRDJ4   | 0          | 0        |
| TRDMT1  | 0.29165752 | 0.367413 |
| TRDN    | 0          | 0        |
| TRDV1   | 0          | 0        |
| TRDV2   | 0          | 0        |
| TRDV3   | 0          | 0        |
| TREH    | 0          | 0        |
| TREM1   | 0.34280431 | 0.597128 |
| TREM2   | 0.02000507 | 0.045452 |
| TREML1  | 0.1072721  | 0.073118 |
| TREML2  | 12.9967653 | 10.91291 |
| TREML2P | 0          | 0        |
| TREML3  | 0          | 0        |
| TREML4  | 2.91510627 | 2.596208 |
| TRERF1  | 37.5765381 | 25.36611 |
| TREX1   | 1.33144992 | 1.11797  |
| TREX2   | 0.11727276 | 0.114192 |
| TRG@    | 0          | 0        |
| TRGC1   | 0          | 0        |
| TRGC2   | 0          | 0        |
| TRGJ1   | 0          | 0        |
| TRGJ2   | 0          | 0        |
| TRGJP   | 0          | 0        |
| TRGJP1  | 0          | 0        |
| TRGJP2  | 0          | 0        |
| TRGV1   | 0          | 0        |
| TRGV10  | 0          | 0        |
| TRGV11  | 0          | 0        |
| TRGV2   | 0          | 0        |
| TRGV3   | 0          | 0        |
| TRGV4   | 0          | 0        |
| TRGV5   | 0          | 0        |
| TRGV5P  | 0          | 0        |
| TRGV6   | 0          | 0        |
| TRGV7   | 0          | 0        |
| TRGV8   | 0          | 0        |
| TRGV9   | 0          | 0        |
| TRGVA   | 0          | 0        |
| TRGVB   | 0          | 0        |
| TRH     | 0.04186228 | 0.071334 |
| TRHDE   | 0.00378698 | 0        |
| TRHR    | 0          | 0        |
| TRIAP1  | 1.76100488 | 1.859078 |
| TRIB1   | 90.7046551 | 95.6785  |
| TRIB2   | 3.12899662 | 2.096991 |
| TRIB3   | 0.03429907 | 0.165598 |

|         |            |          |
|---------|------------|----------|
| TRIM10  | 0          | 0.006736 |
| TRIM11  | 16.1108259 | 15.58612 |
| TRIM13  | 2.84824513 | 2.790467 |
| TRIM14  | 1.92160039 | 1.250915 |
| TRIM15  | 0          | 0        |
| TRIM16  | 0.23917129 | 0.164668 |
| TRIM16L | 0.05304069 | 0.036153 |
| TRIM17  | 0.11170954 | 0.072516 |
| TRIM2   | 0.00608548 | 0        |
| TRIM21  | 45.9963176 | 49.05796 |
| TRIM22  | 32.3785876 | 27.42512 |
| TRIM23  | 6.38307484 | 5.775297 |
| TRIM24  | 8.28413789 | 7.31761  |
| TRIM25  | 11.435086  | 9.252153 |
| TRIM26  | 9.94604246 | 9.559522 |
| TRIM27  | 12.144979  | 10.73181 |
| TRIM28  | 29.7509499 | 27.94534 |
| TRIM29  | 0          | 0        |
| TRIM3   | 2.2430712  | 2.343682 |
| TRIM31  | 0          | 0        |
| TRIM32  | 0          | 0        |
| TRIM33  | 19.2301474 | 18.49456 |
| TRIM34  | 0.81454067 | 0.414471 |
| TRIM35  | 1.78568579 | 1.350495 |
| TRIM36  | 6.35229746 | 14.65722 |
| TRIM37  | 4.23572813 | 3.66736  |
| TRIM38  | 23.4256587 | 24.24966 |
| TRIM39  | 18.4337724 | 16.55951 |
| TRIM4   | 8.21622451 | 8.543004 |
| TRIM40  | 0          | 0.01246  |
| TRIM41  | 12.9346442 | 13.29516 |
| TRIM42  | 0          | 0        |
| TRIM43  | 0          | 0        |
| TRIM44  | 17.8160229 | 17.16622 |
| TRIM45  | 0.0410995  | 0.02668  |
| TRIM46  | 0.02676681 | 0.007602 |
| TRIM47  | 0.71540013 | 1.66763  |
| TRIM48  | 0          | 0        |
| TRIM49  | 0.00972045 | 0        |
| TRIM49B | 0          | 0        |
| TRIM5   | 5.15605808 | 3.402709 |
| TRIM50  | 0.09244161 | 0.07001  |
| TRIM52  | 9.72925846 | 9.325957 |
| TRIM53  | 0          | 0        |
| TRIM54  | 0.01196661 | 0        |
| TRIM55  | 0          | 0        |
| TRIM56  | 9.73318112 | 9.117688 |

|              |            |          |
|--------------|------------|----------|
| TRIM58       | 0.01630503 | 0.009261 |
| TRIM59       | 1.60564963 | 1.472792 |
| TRIM6        | 0.01815659 | 0.006875 |
| TRIM60       | 0          | 0.012967 |
| TRIM60P10Y   | 0          | 0        |
| TRIM60P11Y   | 0          | 0        |
| TRIM60P12Y   | 0          | 0        |
| TRIM60P1Y    | 0          | 0        |
| TRIM60P2Y    | 0          | 0        |
| TRIM60P3Y    | 0          | 0        |
| TRIM60P4Y    | 0          | 0        |
| TRIM60P5Y    | 0          | 0        |
| TRIM60P6Y    | 0          | 0        |
| TRIM60P7Y    | 0          | 0        |
| TRIM60P8Y    | 0          | 0        |
| TRIM60P9Y    | 0          | 0        |
| TRIM61       | 0.03992151 | 0.030234 |
| TRIM62       | 6.80955785 | 6.094092 |
| TRIM63       | 0          | 0        |
| TRIM64       | 0          | 0        |
| TRIM65       | 2.88643441 | 3.594327 |
| TRIM66       | 0.71356347 | 0.646536 |
| TRIM67       | 0.00493437 | 0.005606 |
| TRIM68       | 3.05822996 | 2.67079  |
| TRIM69       | 0.19908257 | 0.075387 |
| TRIM6-TRIM34 | 0.29151239 | 0.331163 |
| TRIM7        | 0.01782941 | 0.005064 |
| TRIM71       | 0.00670023 | 0        |
| TRIM72       | 0.06015831 | 0        |
| TRIM73       | 0.38935798 | 0.353853 |
| TRIM74       | 0.38935798 | 0.406931 |
| TRIM75       | 0.01494338 | 0.016976 |
| TRIM8        | 33.1011041 | 56.59657 |
| TRIM9        | 0.03650759 | 0.017281 |
| TRIML1       | 0          | 0        |
| TRIML2       | 0          | 0        |
| TRIMP1       | 0          | 0        |
| TRIO         | 2.39097095 | 2.270101 |
| TRIOBP       | 10.5184682 | 17.22057 |
| TRIP10       | 0.40775132 | 1.223355 |
| TRIP11       | 3.63461371 | 3.492742 |
| TRIP12       | 44.0589932 | 43.90208 |
| TRIP13       | 0.02682943 | 0.01016  |
| TRIP4        | 13.3222635 | 11.77767 |
| TRIP6        | 0.28801823 | 0.354459 |
| TRIT1        | 0.36505737 | 0.347461 |
| TRLP1        | 0          | 0        |

|          |            |          |
|----------|------------|----------|
| TRMEP1   | 0          | 0        |
| TRMT1    | 1.05927789 | 1.193244 |
| TRMT11   | 0.3875637  | 0.464738 |
| TRMT12   | 5.40786666 | 4.852335 |
| TRMT2A   | 5.63811801 | 4.612581 |
| TRMT2B   | 7.78411501 | 7.003904 |
| TRMT5    | 0.14708588 | 0.198704 |
| TRMT6    | 2.86584996 | 2.997266 |
| TRMT61A  | 0.5060092  | 0.633792 |
| TRMT61B  | 1.68749945 | 1.515487 |
| TRMU     | 8.55358424 | 7.965757 |
| TRNA     | 0          | 0        |
| TRNAA44P | 0          | 0        |
| TRNAA45P | 0          | 0        |
| TRNAA46P | 0          | 0        |
| TRNAC31P | 0          | 0        |
| TRNAC32P | 0          | 0        |
| TRNAD20P | 0          | 0        |
| TRNAE27P | 0          | 0        |
| TRNAE28P | 0          | 0        |
| TRNAE29P | 0          | 0        |
| TRNAE30P | 0          | 0        |
| TRNAE31P | 0          | 0        |
| TRNAE32P | 0          | 0        |
| TRNAE33P | 0          | 0        |
| TRNAE34P | 0          | 0        |
| TRNAE35P | 0          | 0        |
| TRNAE36P | 0          | 0        |
| TRNAE37P | 0          | 0        |
| TRNAE38P | 0          | 0        |
| TRNAE39P | 0          | 0        |
| TRNAE40P | 0          | 0        |
| TRNAE41P | 0          | 0        |
| TRNAE42P | 0          | 0        |
| TRNAE43P | 0          | 0        |
| TRNAF13P | 0          | 0        |
| TRNAF14P | 0          | 0        |
| TRNAF15P | 0          | 0        |
| TRNAF16P | 0          | 0        |
| TRNAF17P | 0          | 0        |
| TRNAG32P | 0          | 0        |
| TRNAG33P | 0          | 0        |
| TRNAG34P | 0          | 0        |
| TRNAG35P | 0          | 0        |
| TRNAI28P | 0          | 0        |
| TRNAI29P | 0          | 0        |
| TRNAI30P | 0          | 0        |

|          |   |   |
|----------|---|---|
| TRNAK35P | 0 | 0 |
| TRNAK36P | 0 | 0 |
| TRNAK37P | 0 | 0 |
| TRNAK38P | 0 | 0 |
| TRNAK39P | 0 | 0 |
| TRNAK40P | 0 | 0 |
| TRNAK41P | 0 | 0 |
| TRNAK42P | 0 | 0 |
| TRNAK43P | 0 | 0 |
| TRNAL40P | 0 | 0 |
| TRNAL41P | 0 | 0 |
| TRNAL42P | 0 | 0 |
| TRNAL43P | 0 | 0 |
| TRNAL44P | 0 | 0 |
| TRNAL45P | 0 | 0 |
| TRNAL46P | 0 | 0 |
| TRNAN34P | 0 | 0 |
| TRNAN35P | 0 | 0 |
| TRNAN36P | 0 | 0 |
| TRNAP22P | 0 | 0 |
| TRNAP23P | 0 | 0 |
| TRNAP24P | 0 | 0 |
| TRNAP25P | 0 | 0 |
| TRNAP26P | 0 | 0 |
| TRNAP27P | 0 | 0 |
| TRNAP28P | 0 | 0 |
| TRNAQ33P | 0 | 0 |
| TRNAQ34P | 0 | 0 |
| TRNAQ35P | 0 | 0 |
| TRNAQ36P | 0 | 0 |
| TRNAQ37P | 0 | 0 |
| TRNAQ38P | 0 | 0 |
| TRNAQ39P | 0 | 0 |
| TRNAQ40P | 0 | 0 |
| TRNAQ41P | 0 | 0 |
| TRNAQ42P | 0 | 0 |
| TRNAQ43P | 0 | 0 |
| TRNAQ44P | 0 | 0 |
| TRNAQ45P | 0 | 0 |
| TRNAQ46P | 0 | 0 |
| TRNAQ47P | 0 | 0 |
| TRNAQ48P | 0 | 0 |
| TRNAQ49P | 0 | 0 |
| TRNAQ50P | 0 | 0 |
| TRNAQ51P | 0 | 0 |
| TRNAQ52P | 0 | 0 |
| TRNAQ53P | 0 | 0 |

|           |            |          |
|-----------|------------|----------|
| TRNAQ54P  | 0          | 0        |
| TRNAR30P  | 0          | 0        |
| TRNAR31P  | 0          | 0        |
| TRNAR32P  | 0          | 0        |
| TRNAR33P  | 0          | 0        |
| TRNAR34P  | 0          | 0        |
| TRNAS29P  | 0          | 0        |
| TRNAS30P  | 0          | 0        |
| TRNAS31P  | 0          | 0        |
| TRNAS32P  | 0          | 0        |
| TRNASUP4P | 0          | 0        |
| TRNASUP5P | 0          | 0        |
| TRNASUP6P | 0          | 0        |
| TRNAU1AP  | 5.68708738 | 5.33481  |
| TRNAV33P  | 0          | 0        |
| TRNAV34P  | 0          | 0        |
| TRNAV35P  | 0          | 0        |
| TRNAV36P  | 0          | 0        |
| TRNAV37P  | 0          | 0        |
| TRNAY16P  | 0          | 0        |
| TRNAY17P  | 0          | 0        |
| TRNC      | 0          | 0        |
| TRND      | 0          | 0        |
| TRNE      | 0          | 0        |
| TRNF      | 0          | 0        |
| TRNG      | 0          | 0        |
| TRNH      | 0          | 0        |
| TRNI      | 0          | 0        |
| TRNK      | 0          | 0        |
| TRNL1     | 0          | 0        |
| TRNL2     | 0          | 0        |
| TRNM      | 0          | 0        |
| TRNN      | 0          | 0        |
| TRNP      | 0          | 0        |
| TRNP1     | 0.47466114 | 0.796579 |
| TRNQ      | 0          | 0        |
| TRNR      | 0          | 0        |
| TRNS1     | 0          | 0        |
| TRNS2     | 0          | 0        |
| TRNT      | 0          | 0        |
| TRNT1     | 6.45725235 | 5.457055 |
| TRNV      | 0          | 0        |
| TRNW      | 0          | 0        |
| TRNY      | 0          | 0        |
| TRO       | 0.00452937 | 0.025727 |
| TROAP     | 0.01474427 | 0.01675  |
| TROVE2    | 6.88435266 | 6.00652  |

|                |            |          |
|----------------|------------|----------|
| TRPA1          | 0          | 0        |
| TRPC1          | 0.03100319 | 0.04109  |
| TRPC2          | 0          | 0        |
| TRPC3          | 0.02323883 | 0.065999 |
| TRPC4          | 0          | 0        |
| TRPC4AP        | 107.766428 | 115.8239 |
| TRPC5          | 0.00720046 | 0.00818  |
| TRPC6          | 6.55104089 | 2.387475 |
| TRPC6P (NC_000 | 0          | 0        |
| TRPC6P (NC_000 | 0          | 0        |
| TRPC7          | 0          | 0.027677 |
| TRPM1          | 0.0038735  | 0.0044   |
| TRPM2          | 0.07156341 | 0.13414  |
| TRPM3          | 0          | 0.003557 |
| TRPM4          | 0.05703542 | 0.047122 |
| TRPM5          | 0.00535132 | 0.006079 |
| TRPM6          | 1.07559853 | 0.725767 |
| TRPM7          | 6.63224873 | 6.400563 |
| TRPM8          | 0          | 0.004249 |
| TRPS1          | 0.05051131 | 0.066945 |
| TRPT1          | 10.5126655 | 10.16539 |
| TRPV1          | 3.3336467  | 3.357713 |
| TRPV2          | 15.132785  | 16.77808 |
| TRPV3          | 0.00614776 | 0.020952 |
| TRPV4          | 0.03897188 | 0.007379 |
| TRPV5          | 0          | 0        |
| TRPV6          | 0.00726515 | 0.02476  |
| TRRAP          | 5.12104105 | 4.669626 |
| TRUB1          | 0.64086589 | 0.65103  |
| TRUB2          | 0.89127532 | 0.680535 |
| TRY3           | 0          | 0        |
| TRY5           | 0          | 0        |
| TRY6           | 0          | 0        |
| TRYX3          | 0          | 0        |
| TSC1           | 5.4083245  | 4.839955 |
| TSC2           | 10.3222727 | 10.03836 |
| TSC22D1        | 2.78707876 | 3.087474 |
| TSC22D2        | 13.7006899 | 17.29696 |
| TSC22D3        | 123.673572 | 135.0768 |
| TSC22D4        | 72.2784353 | 74.13104 |
| TSEN15         | 3.71161455 | 3.04657  |
| TSEN2          | 0.04083721 | 0.013255 |
| TSEN34         | 5.08700605 | 2.9795   |
| TSEN54         | 41.5848766 | 47.90558 |
| TSEPA          | 0.03652043 | 0.011854 |
| TSFM           | 1.83505108 | 1.483986 |
| TSG1           | 0          | 0        |



|          |            |          |
|----------|------------|----------|
| TSG101   | 32.922324  | 35.03357 |
| TSGA10   | 0.46637608 | 0.455014 |
| TSGA10IP | 0.08527075 | 0.069192 |
| TSGA13   | 0          | 0        |
| TSGA14   | 0.22062883 | 0.20322  |
| TSHB     | 0          | 0        |
| TSHR     | 0.0043821  | 0.004978 |
| TSHZ1    | 4.27956706 | 4.438485 |
| TSHZ2    | 0.00966238 | 0.021953 |
| TSHZ3    | 0          | 0.009723 |
| TSIX     | 0          | 0        |
| TSKS     | 0          | 0.013182 |
| TSKU     | 0.02327527 | 0.035255 |
| TSLP     | 0.007477   | 0.008494 |
| TSN      | 13.0174438 | 13.31623 |
| TSNARE1  | 0.50552708 | 0.417663 |
| TSNAX    | 32.5218232 | 34.81818 |
| TSNAXIP1 | 0          | 0.009765 |
| TSP50    | 0.01560901 | 0        |
| TSPAN1   | 0          | 0        |
| TSPAN10  | 0          | 0        |
| TSPAN11  | 0.00378017 | 0        |
| TSPAN12  | 0.01640041 | 0.037262 |
| TSPAN13  | 0.16581491 | 0.075347 |
| TSPAN14  | 43.7051018 | 66.4322  |
| TSPAN15  | 0.02475024 | 0.014058 |
| TSPAN16  | 5.903266   | 5.833479 |
| TSPAN17  | 0.13811075 | 0.212271 |
| TSPAN18  | 12.0996769 | 15.73131 |
| TSPAN19  | 0          | 0        |
| TSPAN2   | 2.26184571 | 2.167311 |
| TSPAN3   | 18.4562083 | 21.96121 |
| TSPAN31  | 5.30466683 | 4.529935 |
| TSPAN32  | 11.1849871 | 12.94934 |
| TSPAN33  | 0.41677756 | 0.485926 |
| TSPAN4   | 0.29696795 | 0.472304 |
| TSPAN5   | 0.01468249 | 0.01668  |
| TSPAN6   | 0          | 0        |
| TSPAN7   | 0.01164193 | 0        |
| TSPAN8   | 0          | 0        |
| TSPAN9   | 0.09257967 | 0.066424 |
| TSP0     | 66.0137123 | 75.57182 |
| TSPY1    | 0          | 0        |
| TSPY10   | 0          | 0        |
| TSPY11P  | 0          | 0        |
| TSPY12P  | 0          | 0        |
| TSPY13P  | 0          | 0        |

|         |            |          |
|---------|------------|----------|
| TSPY14P | 0          | 0        |
| TSPY15P | 0          | 0        |
| TSPY16P | 0          | 0        |
| TSPY17P | 0          | 0        |
| TSPY18P | 0          | 0        |
| TSPY19P | 0          | 0        |
| TSPY2   | 0          | 0        |
| TSPY20P | 0          | 0        |
| TSPY21P | 0          | 0        |
| TSPY22P | 0          | 0        |
| TSPY23P | 0          | 0        |
| TSPY3   | 0          | 0        |
| TSPY4   | 0          | 0        |
| TSPY5P  | 0          | 0        |
| TSPY6P  | 0          | 0        |
| TSPY7P  | 0          | 0        |
| TSPY8   | 0          | 0        |
| TSPY9   | 0          | 0        |
| TSPYL1  | 28.9076009 | 27.50468 |
| TSPYL2  | 18.612833  | 15.51896 |
| TSPYL3  | 0          | 0        |
| TSPYL4  | 4.37794679 | 4.280258 |
| TSPYL5  | 0.04239928 | 0.026759 |
| TSPYL6  | 0          | 0        |
| TSR1    | 0.67504641 | 0.65452  |
| TSR2    | 24.5639338 | 21.25324 |
| TSSC1   | 2.11352833 | 1.956886 |
| TSSC4   | 12.5649976 | 12.24447 |
| TSSK1A  | 0          | 0        |
| TSSK1B  | 0          | 0        |
| TSSK2   | 0          | 0        |
| TSSK3   | 32.8870021 | 41.02363 |
| TSSK4   | 3.31186597 | 2.94526  |
| TSSK6   | 0.61238828 | 0.447225 |
| TST     | 6.26286454 | 6.797092 |
| TSTA3   | 17.1392057 | 21.3172  |
| TTBK1   | 0.00589936 | 0.006702 |
| TTBK2   | 3.75999081 | 3.618185 |
| TTC1    | 16.3928842 | 15.92341 |
| TTC12   | 0.89913942 | 0.732545 |
| TTC13   | 8.0609938  | 6.992009 |
| TTC14   | 15.3682125 | 14.839   |
| TTC15   | 9.7462905  | 9.624071 |
| TTC16   | 0.01458067 | 0.04141  |
| TTC17   | 8.97554983 | 7.977681 |
| TTC18   | 0.38124416 | 0.316744 |
| TTC19   | 13.669486  | 11.80528 |

|        |            |          |
|--------|------------|----------|
| TTC21A | 0.23207857 | 0.168284 |
| TTC21B | 1.56745217 | 1.317194 |
| TTC22  | 2.35363288 | 2.526085 |
| TTC23  | 0.02760679 | 0.043906 |
| TTC23L | 0          | 0.017576 |
| TTC24  | 0.02616718 | 0.029726 |
| TTC25  | 0.02018755 | 0.0344   |
| TTC26  | 0.17594419 | 0.088834 |
| TTC27  | 0.06579554 | 0.09966  |
| TTC28  | 0.0338687  | 0.050625 |
| TTC29  | 0          | 0        |
| TTC3   | 15.0765092 | 16.83059 |
| TTC30A | 0.00450318 | 0.005116 |
| TTC30B | 0.46104695 | 0.415393 |
| TTC31  | 10.7478886 | 8.86339  |
| TTC32  | 5.60163927 | 5.288431 |
| TTC33  | 3.08926494 | 3.023596 |
| TTC35  | 6.01208979 | 5.305658 |
| TTC36  | 0.12386057 | 0.140708 |
| TTC37  | 2.36962483 | 1.836249 |
| TTC38  | 11.487403  | 10.83524 |
| TTC39A | 0.09543621 | 0.158456 |
| TTC39B | 0.34638107 | 0.285283 |
| TTC39C | 0.0343676  | 0.047718 |
| TTC3L  | 0          | 0        |
| TTC4   | 3.15588964 | 3.229001 |
| TTC5   | 2.76918993 | 2.084283 |
| TTC7A  | 8.7313414  | 9.548487 |
| TTC7B  | 17.9088798 | 19.997   |
| TTC8   | 1.3934173  | 1.572102 |
| TTC9   | 7.52027364 | 5.658807 |
| TTC9B  | 0.07482324 | 0.141667 |
| TTC9C  | 12.0540308 | 10.21251 |
| TTF1   | 5.54956138 | 4.994782 |
| TTF2   | 2.8322485  | 4.309651 |
| TTK    | 0.4462924  | 0.321902 |
| TTL    | 3.53407964 | 4.643813 |
| TTL1   | 0.41634319 | 0.264308 |
| TTL10  | 0.01343472 | 0        |
| TTL11  | 0.20799508 | 0.114767 |
| TTL12  | 4.65905783 | 6.09772  |
| TTL13  | 0.08208439 | 0.186498 |
| TTL2   | 0.00730807 | 0        |
| TTL3   | 32.1251236 | 33.24397 |
| TTL4   | 0.95091551 | 0.841261 |
| TTL5   | 2.04238377 | 1.973428 |
| TTL6   | 0.00588121 | 0        |

|        |            |          |
|--------|------------|----------|
| TTLL7  | 0.1267975  | 0.157139 |
| TTLL8  | 0          | 0.009535 |
| TTLL9  | 0.01308359 | 0        |
| TTMA   | 0          | 0        |
| TTN    | 0.46379959 | 0.387164 |
| TTPA   | 0          | 0        |
| TTPAL  | 2.36471542 | 1.867766 |
| TTR    | 0          | 0        |
| TTRAP  | 18.578747  | 15.86964 |
| TTY1   | 0          | 0        |
| TTY10  | 0          | 0        |
| TTY11  | 0          | 0        |
| TTY12  | 0          | 0        |
| TTY13  | 0          | 0        |
| TTY14  | 0          | 0        |
| TTY15  | 0          | 0        |
| TTY16  | 0          | 0        |
| TTY17A | 0          | 0        |
| TTY17B | 0          | 0        |
| TTY17C | 0          | 0        |
| TTY18  | 0          | 0        |
| TTY19  | 0          | 0        |
| TTY1B  | 0          | 0        |
| TTY2   | 0          | 0        |
| TTY20  | 0          | 0        |
| TTY21  | 0          | 0        |
| TTY21B | 0          | 0        |
| TTY22  | 0          | 0        |
| TTY23  | 0          | 0        |
| TTY23B | 0          | 0        |
| TTY2B  | 0          | 0        |
| TTY3   | 0          | 0        |
| TTY3B  | 0          | 0        |
| TTY4   | 0          | 0        |
| TTY4B  | 0          | 0        |
| TTY4C  | 0          | 0        |
| TTY5   | 0          | 0        |
| TTY6   | 0          | 0        |
| TTY6B  | 0          | 0        |
| TTY7   | 0          | 0        |
| TTY7B  | 0          | 0        |
| TTY8   | 0          | 0        |
| TTY8B  | 0          | 0        |
| TTY9A  | 0          | 0        |
| TTY9B  | 0          | 0        |
| TYH1   | 0.01028134 | 0.01168  |
| TYH2   | 0.46243397 | 0.391081 |

|         |            |          |
|---------|------------|----------|
| TTYH3   | 56.9933847 | 76.40065 |
| TUB     | 0.00636938 | 0.007236 |
| TUBA1A  | 18.1352945 | 10.66658 |
| TUBA1B  | 15.9878871 | 13.12114 |
| TUBA1C  | 42.3755865 | 32.32872 |
| TUBA3C  | 0.01412044 | 0.016041 |
| TUBA3D  | 0.42159461 | 0.525287 |
| TUBA3E  | 0.02730562 | 0.01551  |
| TUBA4A  | 35.6064976 | 30.41392 |
| TUBA4B  | 0          | 0        |
| TUBA8   | 0.72932268 | 0.698326 |
| TUBAL3  | 0          | 0.026569 |
| TUBAP   | 0          | 0        |
| TUBB    | 30.6122732 | 34.79524 |
| TUBB1   | 0.64952395 | 0.560234 |
| TUBB1P1 | 0          | 0        |
| TUBB1P2 | 0          | 0        |
| TUBB2A  | 0.05188237 | 0.02947  |
| TUBB2B  | 0.01041373 | 0.02366  |
| TUBB2C  | 24.2366166 | 27.93852 |
| TUBB3   | 0.02457666 | 0.055839 |
| TUBB4   | 0.01838682 | 0.031332 |
| TUBB4Q  | 1.48224555 | 2.544084 |
| TUBB6   | 0.11584204 | 0.184238 |
| TUBB8   | 2.97661989 | 6.047316 |
| TUBBP1  | 0          | 0        |
| TUBBP2  | 0          | 0        |
| TUBBP3  | 0          | 0        |
| TUBBP5  | 0          | 0        |
| TUBD1   | 4.54187975 | 4.029163 |
| TUBE1   | 1.26316747 | 1.268604 |
| TUBG1   | 1.65961095 | 1.897587 |
| TUBG1P  | 0          | 0        |
| TUBG2   | 0.16191124 | 0.183934 |
| TUBGCP2 | 23.2475204 | 21.90589 |
| TUBGCP3 | 9.98838345 | 9.265458 |
| TUBGCP4 | 15.6855644 | 14.11287 |
| TUBGCP5 | 0.33583539 | 0.179196 |
| TUBGCP6 | 16.9837447 | 16.57156 |
| TUFM    | 18.7410724 | 18.54527 |
| TUFML   | 0          | 0        |
| TUFT1   | 2.37895098 | 2.287934 |
| TUG1    | 0          | 0        |
| TULP1   | 0          | 0        |
| TULP2   | 0.01235331 | 0        |
| TULP3   | 0.80949315 | 0.797527 |
| TULP4   | 0.30622167 | 0.334988 |

|         |            |          |
|---------|------------|----------|
| TUSC1   | 0.09363508 | 0.096701 |
| TUSC2   | 12.1376911 | 12.92238 |
| TUSC2P1 | 0          | 0        |
| TUSC3   | 3.52409454 | 3.296055 |
| TUSC4   | 16.4892169 | 14.74159 |
| TUSC5   | 0.01169373 | 0.013284 |
| TUT1    | 4.75187883 | 4.917008 |
| TWF1    | 11.4551803 | 12.25239 |
| TWF1P1  | 0          | 0        |
| TWF1P2  | 0          | 0        |
| TWF2    | 31.8808711 | 47.57914 |
| TWIST1  | 0.05048099 | 0.028674 |
| TWIST2  | 0.03156957 | 0        |
| TWISTNB | 0.32413152 | 0.282301 |
| TWSG1   | 1.57005528 | 1.25043  |
| TXK     | 0.77925043 | 0.795077 |
| TXLNA   | 8.61442355 | 7.913561 |
| TXLNB   | 0.0044878  | 0.005098 |
| TXN     | 64.3590347 | 44.10282 |
| TXN2    | 3.61963033 | 3.092907 |
| TXNDC11 | 25.206936  | 33.97377 |
| TXNDC12 | 38.9231439 | 37.9624  |
| TXNDC15 | 4.20620609 | 3.709994 |
| TXNDC16 | 1.1131601  | 0.98122  |
| TXNDC17 | 3.20192992 | 2.774126 |
| TXNDC2  | 0.22714073 | 0.224379 |
| TXNDC3  | 0.50017007 | 0.485554 |
| TXNDC5  | 7.73234211 | 6.466265 |
| TXNDC6  | 0.20700045 | 0.134375 |
| TXNDC8  | 0.04273441 | 0        |
| TXNDC9  | 6.95347547 | 7.2592   |
| TXNIP   | 907.923094 | 699.018  |
| TXNL1   | 13.3710942 | 12.4116  |
| TXNL4A  | 10.4444506 | 10.12577 |
| TXNL4B  | 2.66364525 | 2.00076  |
| TXNRD1  | 53.0525774 | 54.22535 |
| TXNRD2  | 5.97359199 | 6.871225 |
| TYK2    | 142.60401  | 180.291  |
| TYMP    | 71.2531708 | 87.97929 |
| TYMS    | 1.20865769 | 1.131638 |
| TYR     | 0          | 0        |
| TYRL    | 0          | 0        |
| TYRO3   | 0.00532422 | 0.006048 |
| TYRO3P  | 0          | 0        |
| TYROBP  | 655.462835 | 701.2769 |
| TYRP1   | 0          | 0        |
| TYSND1  | 1.73091231 | 1.62082  |

|         |            |          |
|---------|------------|----------|
| TYW1    | 1.73580487 | 1.677909 |
| TYW1B   | 1.40255451 | 1.209746 |
| TYW3    | 0.43287446 | 0.321144 |
| U2AF1   | 62.1896309 | 60.78995 |
| U2AF1L4 | 28.5535825 | 25.07631 |
| U2AF2   | 56.5353757 | 54.23926 |
| U58     | 0          | 0        |
| UACA    | 0          | 0.003289 |
| UAP1    | 12.4778608 | 16.8951  |
| UAP1L1  | 2.79296373 | 4.556981 |
| UBA1    | 66.7147768 | 62.82739 |
| UBA2    | 12.3232897 | 12.07251 |
| UBA3    | 46.8332054 | 47.5786  |
| UBA5    | 2.80251647 | 4.335411 |
| UBA52   | 48.3560173 | 47.58328 |
| UBA52P1 | 0          | 0        |
| UBA52P2 | 0          | 0        |
| UBA52P3 | 0          | 0        |
| UBA52P4 | 0          | 0        |
| UBA52P5 | 0          | 0        |
| UBA52P6 | 0          | 0        |
| UBA52P7 | 0          | 0        |
| UBA52P8 | 0          | 0        |
| UBA52P9 | 0          | 0        |
| UBA6    | 10.2533955 | 9.77337  |
| UBA7    | 36.7007211 | 37.09293 |
| UBAC1   | 18.4126492 | 20.17505 |
| UBAC2   | 12.5288366 | 12.23472 |
| UBAP1   | 25.061272  | 24.11217 |
| UBAP2   | 3.37170924 | 3.088784 |
| UBAP2L  | 25.3322924 | 24.07803 |
| UBASH3A | 0.03374852 | 0.028754 |
| UBASH3B | 8.39124827 | 5.034454 |
| UBB     | 509.090171 | 476.7182 |
| UBBP1   | 0          | 0        |
| UBBP2   | 0          | 0        |
| UBBP3   | 0          | 0        |
| UBBP4   | 0          | 0        |
| UBC     | 654.987253 | 563.1188 |
| UBD     | 0.02123771 | 0        |
| UBE2A   | 22.2075634 | 23.50713 |
| UBE2B   | 37.575487  | 42.10534 |
| UBE2C   | 0.21012198 | 0.298377 |
| UBE2CBP | 0.01147045 | 0.026061 |
| UBE2CP1 | 0          | 0        |
| UBE2D1  | 2.37139719 | 1.991177 |
| UBE2D2  | 16.6398591 | 17.47853 |

|           |            |          |
|-----------|------------|----------|
| UBE2D3    | 92.2373738 | 91.53621 |
| UBE2D3P   | 0          | 0        |
| UBE2D4    | 4.63219023 | 4.630089 |
| UBE2DNL   | 0          | 0        |
| UBE2E1    | 22.7320256 | 24.16209 |
| UBE2E2    | 0.07167726 | 0.149282 |
| UBE2E3    | 27.8570221 | 29.18046 |
| UBE2E4P   | 0          | 0        |
| UBE2F     | 15.6525359 | 18.82231 |
| UBE2G1    | 14.2550545 | 13.32185 |
| UBE2G2    | 7.60387176 | 7.216856 |
| UBE2H     | 22.5282413 | 20.65432 |
| UBE2HP    | 0          | 0        |
| UBE2I     | 40.3619321 | 40.75552 |
| UBE2J1    | 17.5582335 | 16.01326 |
| UBE2J2    | 18.8339341 | 18.33773 |
| UBE2K     | 10.7872575 | 11.36649 |
| UBE2L1    | 0          | 0        |
| UBE2L3    | 15.7201994 | 15.92605 |
| UBE2L4    | 0          | 0        |
| UBE2L5P   | 0          | 0        |
| UBE2L6    | 25.6019655 | 23.61057 |
| UBE2L7P   | 0          | 0        |
| UBE2M     | 26.6127713 | 25.10758 |
| UBE2MP1   | 0          | 0        |
| UBE2N     | 10.1501598 | 9.481041 |
| UBE2NL    | 0.05300504 | 0.020072 |
| UBE2O     | 4.12654021 | 4.513862 |
| UBE2Q1    | 29.9299468 | 29.25796 |
| UBE2Q2    | 10.5868028 | 10.8342  |
| UBE2Q2P4Y | 0          | 0        |
| UBE2Q2P5Y | 0          | 0        |
| UBE2R2    | 16.2843712 | 13.86376 |
| UBE2S     | 6.83190855 | 5.053776 |
| UBE2SP1   | 0          | 0        |
| UBE2T     | 0.76413648 | 0.605019 |
| UBE2U     | 0          | 0        |
| UBE2V1    | 1.44418045 | 1.952236 |
| UBE2V1P1  | 0          | 0        |
| UBE2V1P2  | 0          | 0        |
| UBE2V1P3  | 0          | 0        |
| UBE2V2    | 6.74631682 | 6.629528 |
| UBE2W     | 9.06811749 | 8.012954 |
| UBE2Z     | 20.4129427 | 19.04625 |
| UBE3A     | 1.6384951  | 1.654539 |
| UBE3AP1   | 0          | 0        |
| UBE3AP2   | 0          | 0        |



|         |            |          |
|---------|------------|----------|
| UBE3B   | 5.28752215 | 5.364771 |
| UBE3C   | 6.73654688 | 6.15453  |
| UBE4A   | 20.8810866 | 18.35275 |
| UBE4B   | 10.104977  | 9.764378 |
| UBFD1   | 3.05295822 | 2.41709  |
| UBIAD1  | 1.97939624 | 1.967547 |
| UBL3    | 23.2749349 | 25.2316  |
| UBL4A   | 5.60067384 | 8.113684 |
| UBL4B   | 0          | 0        |
| UBL5    | 136.644396 | 128.7679 |
| UBL7    | 9.80304227 | 8.443727 |
| UBLCP1  | 10.6269336 | 9.865589 |
| UBN1    | 16.9921407 | 17.97815 |
| UBN2    | 6.28660943 | 6.743715 |
| UBOX5   | 7.12500821 | 8.149297 |
| UBP1    | 15.1432743 | 15.04619 |
| UBQLN1  | 29.8531451 | 32.28616 |
| UBQLN1P | 0          | 0        |
| UBQLN2  | 10.6207812 | 10.37478 |
| UBQLN3  | 0          | 0        |
| UBQLN4  | 4.74224032 | 4.583598 |
| UBQLN4P | 0          | 0        |
| UBQLNL  | 0.10809939 | 0.040934 |
| UBR1    | 5.18849158 | 4.806    |
| UBR2    | 40.2307016 | 35.6327  |
| UBR3    | 2.5214539  | 2.203855 |
| UBR4    | 30.445823  | 29.16534 |
| UBR5    | 27.6682075 | 25.54288 |
| UBR7    | 8.75391419 | 10.65584 |
| UBTD1   | 10.0332825 | 12.99338 |
| UBTD2   | 1.51326594 | 1.51312  |
| UBTF    | 15.9890105 | 29.39858 |
| UBTFL1  | 0          | 0        |
| UBTFL2  | 0.01765351 | 0        |
| UBTFL3  | 0          | 0        |
| UBTFL5  | 0          | 0        |
| UBTFL6  | 0          | 0        |
| UBTFL7  | 0          | 0        |
| UBXN1   | 60.9555173 | 61.40826 |
| UBXN10  | 0          | 0.008037 |
| UBXN11  | 1.95844058 | 1.464    |
| UBXN2A  | 1.88518263 | 2.003023 |
| UBXN2B  | 46.3611037 | 48.98144 |
| UBXN4   | 49.8605195 | 51.38809 |
| UBXN6   | 49.3257312 | 48.83755 |
| UBXN7   | 11.404246  | 10.36533 |
| UBXN8   | 0.26263425 | 0.165754 |

|          |            |          |
|----------|------------|----------|
| UCA1     | 0          | 0        |
| UCHL1    | 0          | 0        |
| UCHL3    | 5.3061558  | 5.659979 |
| UCHL5    | 4.91372973 | 4.347847 |
| UCK1     | 12.225376  | 11.72881 |
| UCK2     | 0.15138238 | 0.229297 |
| UCKL1    | 5.99904424 | 6.593489 |
| UCKL10S  | 0          | 0        |
| UCMA     | 0          | 0        |
| UCN      | 0.92306331 | 0.621401 |
| UCN2     | 0.01415847 | 0.016084 |
| UCN3     | 0.02961314 | 0        |
| UCP1     | 0.02102533 | 0        |
| UCP2     | 34.6930734 | 27.10655 |
| UCP3     | 0.88083166 | 0.870419 |
| UCRC     | 25.8126371 | 26.60434 |
| UEVLD    | 1.05176266 | 0.969382 |
| UFC1     | 14.0168873 | 11.6871  |
| UFD1L    | 17.105354  | 16.16215 |
| UFM1     | 16.2075312 | 14.82144 |
| UFSP1    | 0.12665862 | 0.143886 |
| UFSP2    | 2.23874595 | 1.792532 |
| UGCG     | 1.72107169 | 1.50285  |
| UGCGL1   | 12.6655964 | 10.79213 |
| UGCGL2   | 0.2784812  | 0.30153  |
| UGDH     | 1.33180209 | 1.041088 |
| UGP2     | 21.2755298 | 18.98459 |
| UGT1A1   | 0          | 0        |
| UGT1A10  | 0          | 0        |
| UGT1A11P | 0          | 0        |
| UGT1A12P | 0          | 0        |
| UGT1A13P | 0          | 0        |
| UGT1A2P  | 0          | 0        |
| UGT1A3   | 0          | 0        |
| UGT1A4   | 0          | 0        |
| UGT1A5   | 0          | 0        |
| UGT1A6   | 0          | 0        |
| UGT1A7   | 0          | 0        |
| UGT1A8   | 0          | 0        |
| UGT1A9   | 0          | 0        |
| UGT2A1   | 0.00808045 | 0        |
| UGT2A2   | 0          | 0        |
| UGT2A3   | 1.43756894 | 0.844707 |
| UGT2B10  | 0.02288679 | 0.026    |
| UGT2B11  | 0.15872782 | 0.208058 |
| UGT2B15  | 0          | 0        |
| UGT2B17  | 0          | 0        |

|           |            |          |
|-----------|------------|----------|
| UGT2B24P  | 0          | 0        |
| UGT2B25P  | 0          | 0        |
| UGT2B26P  | 0          | 0        |
| UGT2B27P  | 0          | 0        |
| UGT2B28   | 16.7697948 | 10.64601 |
| UGT2B29P  | 0          | 0        |
| UGT2B4    | 0.01999556 | 0.011358 |
| UGT2B7    | 0.0334266  | 0.025315 |
| UGT3A1    | 0          | 0.008461 |
| UGT3A2    | 0          | 0.010203 |
| UGT8      | 0.26450826 | 0.272533 |
| UHKM1     | 16.6245117 | 15.80535 |
| UHRF1     | 0.79181137 | 1.19369  |
| UHRF1BP1  | 6.99534784 | 8.408015 |
| UHRF1BP1L | 8.23688706 | 8.452262 |
| UHRF2     | 33.5383352 | 34.99324 |
| UIMC1     | 13.9442191 | 10.45661 |
| ULBP1     | 0          | 0.007602 |
| ULBP2     | 0.01558586 | 0        |
| ULBP3     | 0          | 0        |
| ULK1      | 74.0183643 | 94.14702 |
| ULK2      | 0.31058318 | 0.29533  |
| ULK3      | 4.09335665 | 4.387246 |
| ULK4      | 0.47751956 | 0.416441 |
| UMOD      | 0          | 0        |
| UMODL1    | 0.01598277 | 0.013618 |
| UMPS      | 0.81475135 | 0.826723 |
| UNC119    | 37.6189144 | 37.75902 |
| UNC119B   | 6.60783629 | 5.029228 |
| UNC13A    | 0.00832522 | 0.004729 |
| UNC13B    | 0.0330068  | 0.011249 |
| UNC13C    | 0          | 0.002934 |
| UNC13D    | 145.86114  | 178.8801 |
| UNC45A    | 2.67037809 | 2.32536  |
| UNC45B    | 0.00740459 | 0.004206 |
| UNC50     | 26.4702111 | 30.02879 |
| UNC5A     | 0.53506736 | 0.748609 |
| UNC5B     | 0.12620247 | 0.22461  |
| UNC5C     | 0.00576668 | 0.026204 |
| UNC5CL    | 2.75926673 | 2.80672  |
| UNC5D     | 0          | 0.003276 |
| UNC84A    | 4.70027359 | 4.55295  |
| UNC84B    | 130.924112 | 170.5023 |
| UNC93A    | 0          | 0        |
| UNC93B1   | 41.5874689 | 43.08605 |
| UNC93B3   | 0          | 0        |
| UNC93B4   | 0          | 0        |

|          |            |          |
|----------|------------|----------|
| UNC93B6  | 0          | 0        |
| UNCX     | 0.01317377 | 0.044897 |
| UNG      | 1.81860762 | 1.433528 |
| UNGP1    | 0          | 0        |
| UNGP2    | 0          | 0        |
| UNGP3    | 0          | 0        |
| UNK      | 6.82842929 | 6.146773 |
| UNKL     | 16.0901124 | 17.14951 |
| UNQ5830  | 0          | 0        |
| UNQ9370  | 0          | 0        |
| UNQ9391  | 0          | 0        |
| UOX      | 0          | 0        |
| UPB1     | 1.21045689 | 0.993768 |
| UPF1     | 33.3533735 | 33.21572 |
| UPF2     | 13.1791665 | 11.10777 |
| UPF3A    | 4.46532039 | 5.173926 |
| UPF3B    | 9.11303719 | 7.834637 |
| UPK1A    | 0.03438321 | 0.01953  |
| UPK1B    | 0.01021639 | 0.023212 |
| UPK2     | 0.20658076 | 0.130377 |
| UPK3A    | 0          | 0        |
| UPK3B    | 0.8211076  | 1.088256 |
| UPLP     | 16.051428  | 14.31324 |
| UPP1     | 28.2862662 | 35.52649 |
| UPP2     | 0          | 0.009261 |
| UPRT     | 3.03862592 | 2.260456 |
| UQCC     | 3.89927609 | 2.9805   |
| UQCR     | 20.6931772 | 19.43259 |
| UQCRB    | 7.57463835 | 6.664481 |
| UQCRC1   | 19.3089774 | 17.4153  |
| UQCRC2   | 35.2306173 | 32.84559 |
| UQCRFS1  | 19.4621732 | 18.71391 |
| UQCRFSL1 | 0          | 0        |
| UQCRH    | 43.5667199 | 41.74229 |
| UQCRHL   | 1.09425514 | 1.021111 |
| UQCRQ    | 6.73871806 | 5.711329 |
| URB1     | 0.09726745 | 0.092818 |
| URB2     | 0.37083694 | 0.353192 |
| URG4     | 2.62545971 | 2.921068 |
| URM1     | 8.75852431 | 7.832545 |
| UROC1    | 0.04034282 | 0.09166  |
| UROD     | 11.4780368 | 9.187909 |
| UROS     | 1.11803828 | 0.970222 |
| USE1     | 4.76508669 | 4.073862 |
| USF1     | 92.5605972 | 84.80078 |
| USF1P    | 0          | 0        |
| USF2     | 75.489427  | 83.26945 |

|         |            |          |
|---------|------------|----------|
| USH1C   | 0.00633293 | 0        |
| USH1G   | 0          | 0.006707 |
| USH2A   | 0.0041657  | 0.001183 |
| USHBP1  | 0          | 0.019822 |
| USMG5   | 20.1888802 | 16.71526 |
| USO1    | 8.03893705 | 6.61586  |
| USP1    | 12.6262171 | 12.28393 |
| USP10   | 4.39920361 | 3.633308 |
| USP10P1 | 0          | 0        |
| USP10P2 | 0          | 0        |
| USP11   | 13.8805528 | 13.2566  |
| USP12   | 8.84618685 | 9.034317 |
| USP12P1 | 0          | 0        |
| USP12P2 | 0          | 0        |
| USP12PY | 0          | 0        |
| USP13   | 0.01590218 | 0.021076 |
| USP14   | 4.03204735 | 3.666675 |
| USP15   | 51.8679548 | 47.4128  |
| USP16   | 14.9904104 | 12.11552 |
| USP17   | 0          | 0        |
| USP17L3 | 0          | 0        |
| USP17L4 | 0          | 0        |
| USP17L5 | 0          | 0        |
| USP17L7 | 0          | 0        |
| USP17L8 | 0          | 0        |
| USP18   | 0.78445025 | 0.726989 |
| USP19   | 26.6292194 | 26.08313 |
| USP2    | 0.00516974 | 0.005873 |
| USP20   | 40.4357851 | 44.4121  |
| USP21   | 10.2893718 | 9.071065 |
| USP22   | 29.2904611 | 30.1355  |
| USP24   | 18.4924353 | 16.54095 |
| USP25   | 10.0175037 | 9.779048 |
| USP26   | 0          | 0        |
| USP27X  | 0.78650312 | 0.831556 |
| USP28   | 1.64771052 | 1.815103 |
| USP29   | 0          | 0.013244 |
| USP3    | 5.57667577 | 6.581219 |
| USP30   | 4.69470486 | 4.416804 |
| USP31   | 1.26765175 | 1.328439 |
| USP32   | 13.5769893 | 11.49722 |
| USP33   | 23.0131638 | 25.59304 |
| USP34   | 26.2602852 | 23.72883 |
| USP35   | 1.19729666 | 1.001615 |
| USP36   | 19.7559377 | 14.94531 |
| USP37   | 2.94752523 | 2.667448 |
| USP38   | 8.81485483 | 8.735651 |

|          |            |          |
|----------|------------|----------|
| USP39    | 18.5506428 | 18.06791 |
| USP4     | 28.149448  | 27.13163 |
| USP40    | 0.06363372 | 0.068037 |
| USP41    | 0.08055682 | 0.160149 |
| USP42    | 5.95854594 | 6.885629 |
| USP43    | 0.0051672  | 0.00587  |
| USP44    | 0.02369051 | 0.026913 |
| USP45    | 0.09215862 | 0.123389 |
| USP46    | 0.19592769 | 0.182108 |
| USP47    | 12.4740745 | 12.82247 |
| USP48    | 19.882694  | 16.51566 |
| USP49    | 0.51620265 | 0.405979 |
| USP5     | 2.21388631 | 1.594337 |
| USP50    | 0.1942639  | 0.237663 |
| USP51    | 0.16887816 | 0.124701 |
| USP53    | 0.62167393 | 0.593959 |
| USP54    | 0.80171228 | 0.709228 |
| USP6     | 0.22156916 | 0.266689 |
| USP6NL   | 1.17362815 | 0.874026 |
| USP7     | 30.55122   | 30.81409 |
| USP8     | 18.1352017 | 16.9307  |
| USP9X    | 17.3699311 | 17.90083 |
| USP9Y    | 0          | 0.002379 |
| USP9YP1  | 0          | 0        |
| USP9YP10 | 0          | 0        |
| USP9YP11 | 0          | 0        |
| USP9YP2  | 0          | 0        |
| USP9YP3  | 0          | 0        |
| USP9YP4  | 0          | 0        |
| USP9YP5  | 0          | 0        |
| USP9YP6  | 0          | 0        |
| USP9YP7  | 0          | 0        |
| USP9YP8  | 0          | 0        |
| USP9YP9  | 0          | 0        |
| USPL1    | 14.1156231 | 16.25582 |
| UST      | 0.03351795 | 0.048956 |
| UTF1     | 0.12720598 | 0.227084 |
| UTP11L   | 2.21535195 | 1.969065 |
| UTP14A   | 1.5887308  | 1.497619 |
| UTP14C   | 2.89007986 | 2.617901 |
| UTP15    | 0.86862516 | 0.74498  |
| UTP18    | 6.78919754 | 7.282046 |
| UTP20    | 0.18435085 | 0.145803 |
| UTP23    | 3.02883186 | 2.936323 |
| UTP3     | 8.23568198 | 7.858005 |
| UTP6     | 10.6501192 | 10.25961 |
| UTRN     | 10.2225968 | 9.716595 |

|               |            |          |
|---------------|------------|----------|
| UTS2          | 4.95696545 | 5.314832 |
| UTS2D         | 0          | 0        |
| UTS2R         | 0          | 0        |
| UTY           | 0.01192081 | 0.020313 |
| UVRAG         | 3.93970584 | 3.661829 |
| UXS1          | 15.9102432 | 22.06278 |
| UXT           | 17.9022049 | 13.49477 |
| VAC14         | 4.96431425 | 4.652042 |
| VAMP1         | 47.0742357 | 43.78303 |
| VAMP2         | 51.9828136 | 48.62365 |
| VAMP3         | 30.7036579 | 29.90784 |
| VAMP4         | 6.83372704 | 6.122947 |
| VAMP5         | 14.6386891 | 14.07964 |
| VAMP7 (NC_000 | 6.55705237 | 9.203189 |
| VAMP7 (NC_000 | 19.2066675 | 17.51635 |
| VAMP8         | 20.0335701 | 19.08877 |
| VANGL1        | 0.00967683 | 0.013741 |
| VANGL2        | 0.02752007 | 0.004466 |
| VAPA          | 24.9664532 | 25.75658 |
| VAPB          | 4.75429933 | 4.127087 |
| VARS          | 0.82260261 | 0.745367 |
| VARS2         | 0.87820793 | 0.968315 |
| VASH1         | 0.21269406 | 0.233702 |
| VASH2         | 0.03293294 | 0.064135 |
| VASN          | 0          | 0        |
| VASP          | 343.912376 | 419.1206 |
| VAT1          | 8.70592022 | 8.34853  |
| VAT1L         | 0          | 0.006342 |
| VAV1          | 53.8737705 | 64.52619 |
| VAV2          | 0.06067917 | 0.059085 |
| VAV3          | 9.70266968 | 7.395698 |
| VAX1          | 0.01089772 | 0.008253 |
| VAX2          | 0          | 0        |
| VBP1          | 18.1582404 | 15.62509 |
| VCAM1         | 0          | 0        |
| VCAN          | 0.05405866 | 0.023772 |
| VCL           | 44.1417058 | 31.37259 |
| VCP           | 48.6268668 | 51.5396  |
| VCPIP1        | 18.7391862 | 15.01583 |
| VCX           | 0          | 0        |
| VCX2          | 0          | 0        |
| VCX3A         | 0          | 0        |
| VCX3B         | 0          | 0        |
| VCY           | 0          | 0        |
| VCY1B         | 0          | 0        |
| VDAC1         | 12.2822393 | 19.5604  |
| VDAC1LP       | 0          | 0        |

|          |            |          |
|----------|------------|----------|
| VDAC1P6  | 0          | 0        |
| VDAC2    | 19.5005398 | 19.43545 |
| VDAC2P   | 0          | 0        |
| VDAC3    | 28.3761271 | 25.65191 |
| VDAC4P   | 0          | 0        |
| VDAC5P   | 0          | 0        |
| VDR      | 29.8317523 | 37.99608 |
| VEGFA    | 49.4023372 | 77.59556 |
| VEGFB    | 63.8846595 | 79.75234 |
| VEGFC    | 0          | 0        |
| VENTX    | 1.75283763 | 1.911998 |
| VENTXP1  | 0          | 0        |
| VENTXP2  | 0          | 0        |
| VENTXP3  | 0          | 0        |
| VENTXP4  | 0          | 0        |
| VENTXP5  | 0          | 0        |
| VENTXP6  | 0          | 0        |
| VENTXP7  | 0          | 0        |
| VEPH1    | 0          | 0        |
| VEZF1    | 34.3221623 | 36.25299 |
| VEZF1L1  | 0          | 0        |
| VEZT     | 1.88960668 | 1.675413 |
| VGf      | 0.00823554 | 0.009356 |
| VGLL1    | 0          | 0.019707 |
| VGLL3    | 0.00202244 | 0        |
| VGLL4    | 1.39104684 | 1.730505 |
| VHL      | 27.733885  | 35.91619 |
| VHLL     | 0          | 0        |
| VIL1     | 0.01535817 | 0.026171 |
| VILL     | 0.26404255 | 0.214255 |
| VIM      | 186.154433 | 335.3744 |
| VIP      | 0.69022551 | 0.557922 |
| VIPR1    | 0.03014384 | 0.051366 |
| VIPR2    | 0.00533097 | 0        |
| VIT      | 0          | 0        |
| VKORC1   | 21.3624104 | 20.41483 |
| VKORC1L1 | 7.35703117 | 11.4215  |
| VKORC1P1 | 0          | 0        |
| VKORC1P2 | 0          | 0        |
| VLDLR    | 10.1599303 | 10.09008 |
| VMA21    | 2.92417146 | 3.31681  |
| VMAC     | 2.3795135  | 2.202579 |
| VMO1     | 0.41841455 | 0.445618 |
| VN1R1    | 0.17614519 | 0.163721 |
| VN1R2    | 0          | 0        |
| VN1R3    | 0          | 0        |
| VN1R4    | 0          | 0        |



|         |            |          |
|---------|------------|----------|
| VN1R5   | 0          | 0        |
| VN1R7P  | 0          | 0        |
| VN1R8P  | 0          | 0        |
| VN1R9P  | 0          | 0        |
| VN2R10P | 0          | 0        |
| VN2R11P | 0          | 0        |
| VN2R12P | 0          | 0        |
| VN2R13P | 0          | 0        |
| VN2R14P | 0          | 0        |
| VN2R15P | 0          | 0        |
| VN2R16P | 0          | 0        |
| VN2R17P | 0          | 0        |
| VN2R18P | 0          | 0        |
| VN2R19P | 0          | 0        |
| VN2R1P  | 0          | 0        |
| VN2R20P | 0          | 0        |
| VN2R21P | 0          | 0        |
| VN2R2P  | 0          | 0        |
| VN2R3P  | 0          | 0        |
| VN2R4P  | 0          | 0        |
| VN2R5P  | 0          | 0        |
| VN2R6P  | 0          | 0        |
| VN2R7P  | 0          | 0        |
| VN2R9P  | 0          | 0        |
| VNN1    | 0.00546965 | 0        |
| VNN2    | 0.05051737 | 0.045911 |
| VNN3    | 0          | 0        |
| VPRBP   | 3.49399491 | 3.239354 |
| VPREB1  | 0          | 0        |
| VPREB3  | 0.07188147 | 0.040829 |
| VPS11   | 24.248954  | 20.19337 |
| VPS13A  | 9.20995287 | 8.621544 |
| VPS13B  | 5.62958466 | 5.405646 |
| VPS13C  | 8.17806267 | 7.422849 |
| VPS13D  | 5.37060784 | 5.037682 |
| VPS16A  | 13.9846361 | 12.77536 |
| VPS18   | 16.8364589 | 17.29907 |
| VPS24   | 30.0267179 | 26.6712  |
| VPS25   | 20.2423713 | 16.92133 |
| VPS26A  | 10.4971027 | 10.22764 |
| VPS26B  | 28.2400739 | 24.90067 |
| VPS28   | 89.9020978 | 90.3226  |
| VPS29   | 38.8233405 | 33.92944 |
| VPS33A  | 13.7234104 | 12.86474 |
| VPS33B  | 10.3493387 | 9.901595 |
| VPS35   | 67.1274494 | 76.03245 |
| VPS36   | 7.52975904 | 8.867138 |

|          |            |          |
|----------|------------|----------|
| VPS37A   | 4.97546    | 4.876001 |
| VPS37B   | 19.0444067 | 24.99726 |
| VPS37C   | 3.88953002 | 3.389343 |
| VPS37D   | 0.03929968 | 0        |
| VPS39    | 28.3659215 | 24.76993 |
| VPS41    | 9.22382214 | 7.925913 |
| VPS45    | 0.31347671 | 0.330678 |
| VPS4A    | 26.8710687 | 24.26929 |
| VPS4B    | 19.1653978 | 18.33076 |
| VPS52    | 11.0363394 | 9.324177 |
| VPS53    | 6.43394924 | 4.361188 |
| VPS54    | 5.85908697 | 5.932406 |
| VPS72    | 20.1201619 | 18.74368 |
| VPS8     | 27.4283295 | 24.49561 |
| VRK1     | 6.22241151 | 5.525974 |
| VRK2     | 8.89314674 | 7.262364 |
| VRK3     | 16.3496978 | 15.00212 |
| VSIG1    | 0.02016496 | 0.03818  |
| VSIG2    | 0.05626761 | 0        |
| VSIG4    | 0.21570264 | 0.283732 |
| VSIG8    | 0.85581655 | 1.405779 |
| VSNL1    | 0.03145935 | 0        |
| VSTM1    | 241.842688 | 230.2356 |
| VSTM2A   | 0          | 0.018573 |
| VSTM2B   | 0          | 0        |
| VSTM2L   | 0.1497226  | 0.170087 |
| VSX1     | 0.00950512 | 0.010798 |
| VSX2     | 0          | 0        |
| VTA1     | 8.54883216 | 8.018152 |
| VTCN1    | 0          | 0        |
| VTI1A    | 5.64538037 | 5.085989 |
| VTI1B    | 27.2176148 | 22.07264 |
| VTN      | 0.03758998 | 0        |
| VTRNA1-1 | 0          | 0        |
| VTRNA1-2 | 0          | 0        |
| VTRNA1-3 | 0          | 0        |
| VTRNA3P  | 0          | 0        |
| VWA1     | 0.00828748 | 0.028244 |
| VWA2     | 0          | 0        |
| VWA3A    | 0.00914145 | 0.025962 |
| VWA3B    | 0.00442918 | 0.005032 |
| VWA5A    | 0.10364965 | 0.076536 |
| VWA5B1   | 0.0046984  | 0.010675 |
| VWA5B2   | 0.01046036 | 0.005942 |
| VWC2     | 0          | 0.025262 |
| VWC2L    | 0          | 0        |
| VWCE     | 0.02973039 | 0.01351  |

|               |            |          |
|---------------|------------|----------|
| VWDE          | 0.02636169 | 0.008556 |
| VWF           | 0.35942771 | 0.335306 |
| VWFP          | 0          | 0        |
| WAC           | 83.4679196 | 87.4786  |
| WAPAL         | 20.7083829 | 20.52709 |
| WARS          | 42.9644987 | 30.96695 |
| WARS2         | 0.13349416 | 0.151651 |
| WAS           | 163.127172 | 156.7208 |
| WASF1         | 0.00652961 | 0.007418 |
| WASF2         | 45.7928754 | 40.02294 |
| WASF3         | 0.03565126 | 0.0405   |
| WASF4         | 0          | 0        |
| WASF5P        | 0          | 0        |
| WASH1         | 0.21527643 | 0.163038 |
| WASH2P        | 0          | 0        |
| WASH3P        | 0          | 0        |
| WASH4P        | 0          | 0        |
| WASH5P        | 0          | 0        |
| WASH6P (NC_00 | 0          | 0        |
| WASH6P (NC_00 | 0          | 0        |
| WASL          | 2.75773224 | 2.884362 |
| WBP1          | 22.1803706 | 19.84617 |
| WBP11         | 20.7422674 | 19.19562 |
| WBP11P1       | 0          | 0        |
| WBP2          | 166.331566 | 166.8763 |
| WBP2NL        | 0          | 0.010304 |
| WBP2P1        | 0          | 0        |
| WBP4          | 3.20832311 | 4.125889 |
| WBP5          | 0.01930701 | 0.021933 |
| WBSCR16       | 1.83905334 | 1.69747  |
| WBSCR17       | 0.01293867 | 0.007349 |
| WBSCR22       | 8.9400391  | 8.311241 |
| WBSCR26       | 0          | 0        |
| WBSCR27       | 0.0677508  | 0.025655 |
| WBSCR28       | 0          | 0        |
| WDFY1         | 5.25747369 | 5.801484 |
| WDFY2         | 11.2716529 | 11.55691 |
| WDFY3         | 0.00530507 | 0.003013 |
| WDFY4         | 0.06929351 | 0.078719 |
| WDHD1         | 0.20430191 | 0.292635 |
| WDR1          | 170.457034 | 167.0666 |
| WDR12         | 1.23461628 | 1.182742 |
| WDR13         | 8.9678654  | 7.304559 |
| WDR16         | 0          | 0        |
| WDR17         | 0.0199942  | 0.012979 |
| WDR18         | 0.59646329 | 0.908589 |
| WDR19         | 1.64202253 | 1.580011 |

|        |            |          |
|--------|------------|----------|
| WDR20  | 7.95048492 | 6.559995 |
| WDR21A | 0.1509597  | 0.200075 |
| WDR21B | 0.10133751 | 0.050053 |
| WDR21C | 0          | 0        |
| WDR22  | 21.063974  | 22.13314 |
| WDR23  | 24.5369405 | 20.81345 |
| WDR24  | 3.27503575 | 2.980922 |
| WDR25  | 1.55276895 | 1.013091 |
| WDR26  | 45.9927125 | 42.72769 |
| WDR27  | 0.33970529 | 0.261868 |
| WDR3   | 0.81888702 | 0.837858 |
| WDR31  | 0.00856429 | 0.009729 |
| WDR32  | 3.59143998 | 3.370773 |
| WDR33  | 8.50724186 | 8.055773 |
| WDR34  | 0.39321301 | 0.289039 |
| WDR35  | 1.14975187 | 1.075844 |
| WDR36  | 1.56605545 | 1.456586 |
| WDR37  | 15.2206798 | 13.9809  |
| WDR38  | 0          | 0        |
| WDR4   | 0.62451478 | 0.873971 |
| WDR40A | 19.6155865 | 17.26343 |
| WDR40B | 0.00622235 | 0.014137 |
| WDR40C | 0          | 0        |
| WDR41  | 8.06327196 | 7.563307 |
| WDR42A | 31.8607057 | 29.34066 |
| WDR42B | 0.01216392 | 0        |
| WDR42C | 0          | 0.023731 |
| WDR43  | 5.92744977 | 4.741546 |
| WDR44  | 5.76787635 | 4.833548 |
| WDR45  | 23.9381085 | 22.99961 |
| WDR45L | 26.6169149 | 24.93764 |
| WDR45p | 0          | 0        |
| WDR46  | 9.58220462 | 8.888297 |
| WDR47  | 6.41906814 | 6.484349 |
| WDR48  | 15.6266273 | 13.43052 |
| WDR49  | 0.00810537 | 0        |
| WDR5   | 2.71486366 | 2.378756 |
| WDR51A | 0.0111304  | 0.037933 |
| WDR51B | 4.43011013 | 4.027748 |
| WDR52  | 0.3224744  | 0.329702 |
| WDR53  | 6.93260435 | 5.686207 |
| WDR54  | 0.22547272 | 0.192105 |
| WDR55  | 22.6959483 | 22.65382 |
| WDR59  | 6.06135667 | 5.470818 |
| WDR5B  | 2.54837265 | 2.295437 |
| WDR6   | 19.3172388 | 15.62991 |
| WDR60  | 1.0256259  | 0.937168 |

|         |            |          |
|---------|------------|----------|
| WDR61   | 5.64912335 | 5.093886 |
| WDR62   | 0.26586298 | 0.211417 |
| WDR63   | 0.00699213 | 0        |
| WDR64   | 0.00841687 | 0        |
| WDR65   | 0          | 0        |
| WDR66   | 0.13438294 | 0.178105 |
| WDR67   | 0.43790276 | 0.299842 |
| WDR68   | 22.9283005 | 22.03536 |
| WDR69   | 0.01259756 | 0.028622 |
| WDR7    | 2.62455724 | 2.450175 |
| WDR70   | 3.40844197 | 3.05036  |
| WDR72   | 0.00287664 | 0        |
| WDR73   | 4.03505004 | 4.171847 |
| WDR74   | 4.75261687 | 4.75256  |
| WDR75   | 5.69272237 | 4.618026 |
| WDR76   | 0.64142254 | 0.586718 |
| WDR77   | 3.36160815 | 3.322887 |
| WDR78   | 0.01063228 | 0.006039 |
| WDR8    | 19.9486954 | 20.37053 |
| WDR81   | 12.2420549 | 11.99998 |
| WDR82   | 44.602898  | 46.72956 |
| WDR82P1 | 0          | 0        |
| WDR82P2 | 0          | 0        |
| WDR85   | 6.87563611 | 5.508964 |
| WDR86   | 0          | 0.023405 |
| WDR87   | 0.00234999 | 0        |
| WDR88   | 0.17073935 | 0.207817 |
| WDR89   | 0.45054281 | 0.39314  |
| WDR90   | 0.3263271  | 0.344849 |
| WDR91   | 30.5798167 | 28.1564  |
| WDR92   | 0.26234816 | 0.10644  |
| WDR93   | 0.00872783 | 0        |
| WDSOF1  | 2.10156015 | 2.265825 |
| WDSUB1  | 1.63224306 | 1.01984  |
| WDTC1   | 39.4629962 | 41.0802  |
| WDYHV1  | 0.48352022 | 0.301222 |
| WEE1    | 22.8432326 | 33.00134 |
| WEE2    | 0.00686878 | 0.007803 |
| WFDC1   | 0          | 0        |
| WFDC10A | 0          | 0        |
| WFDC10B | 0          | 0        |
| WFDC11  | 0          | 0        |
| WFDC12  | 0.05432902 | 0        |
| WFDC13  | 0          | 0        |
| WFDC2   | 0          | 0        |
| WFDC3   | 0          | 0        |
| WFDC5   | 0          | 0.023696 |

|          |            |          |
|----------|------------|----------|
| WFDC6    | 0          | 0        |
| WFDC8    | 0.01374205 | 0.015611 |
| WFDC9    | 0          | 0        |
| WFIKKN1  | 1.51106075 | 1.851464 |
| WFIKKN2  | 0.01120156 | 0        |
| WFS1     | 0.01732857 | 0.026247 |
| WHAMM    | 6.58737781 | 5.863371 |
| WHAMML1  | 0          | 0        |
| WHAMML2  | 0          | 0        |
| WHSC1    | 3.86476043 | 4.632399 |
| WHSC1L1  | 16.7385841 | 16.07919 |
| WHSC1L2P | 0          | 0        |
| WHSC2    | 7.67428848 | 7.49622  |
| WIBG     | 6.49214765 | 5.241247 |
| WIF1     | 0          | 0        |
| WIPF1    | 163.873509 | 166.1158 |
| WIPF2    | 13.9280925 | 13.47509 |
| WIPF3    | 0.00665991 | 0        |
| WIP11    | 95.6958541 | 103.6594 |
| WIP12    | 22.8293972 | 22.03659 |
| WISP1    | 0          | 0        |
| WISP2    | 0.04492592 | 0        |
| WISP3    | 0.01493276 | 0        |
| WIT1     | 0          | 0        |
| WIZ      | 5.09995432 | 8.647464 |
| WNK1     | 26.302045  | 27.73785 |
| WNK2     | 0.03076578 | 0.045436 |
| WNK3     | 0.00271505 | 0        |
| WNK4     | 0.02035859 | 0.023128 |
| WNT1     | 0.09205486 | 0.198694 |
| WNT10A   | 0.04426385 | 0.020114 |
| WNT10B   | 0.21293818 | 0.525872 |
| WNT11    | 0.02182183 | 0.012395 |
| WNT16    | 0.00651342 | 0        |
| WNT2     | 0          | 0.008216 |
| WNT2B    | 0          | 0.018778 |
| WNT3     | 0          | 0        |
| WNT3A    | 0          | 0.008146 |
| WNT4     | 0.01076842 | 0.012233 |
| WNT5A    | 0.01080438 | 0.020457 |
| WNT5B    | 0.8006184  | 1.271254 |
| WNT6     | 0          | 0        |
| WNT7A    | 0.02453364 | 0        |
| WNT7B    | 0          | 0        |
| WNT8A    | 0          | 0        |
| WNT8B    | 0.0316012  | 0.023933 |
| WNT9A    | 0.03391182 | 0.038524 |

|        |            |          |
|--------|------------|----------|
| WNT9B  | 0          | 0        |
| WRAP53 | 5.41994503 | 4.418902 |
| WRB    | 4.69160278 | 6.058588 |
| WRN    | 1.61367403 | 1.255361 |
| WRNIP1 | 10.0290512 | 10.01517 |
| WSB1   | 129.923479 | 106.3022 |
| WSB2   | 15.839778  | 13.77076 |
| WSCD1  | 0.00722396 | 0.008207 |
| WSCD2  | 0.00907046 | 0        |
| WT1    | 0.00694134 | 0        |
| WTAP   | 36.4826889 | 32.78847 |
| WTIP   | 0          | 0.010837 |
| WWC1   | 0.01013269 | 0        |
| WWC2   | 0.01432081 | 0.03796  |
| WWC3   | 6.15709258 | 5.540132 |
| WWOX   | 0.23820239 | 0.162361 |
| WWP1   | 12.3040155 | 11.74487 |
| WWP2   | 23.1077844 | 21.78799 |
| WWTR1  | 0.01052846 | 0        |
| XAB2   | 25.8084948 | 26.59299 |
| XAF1   | 7.54383772 | 6.508132 |
| XAGE1A | 0          | 0        |
| XAGE1B | 0          | 0        |
| XAGE1C | 0          | 0        |
| XAGE1D | 0          | 0        |
| XAGE1E | 0          | 0        |
| XAGE2  | 0          | 0        |
| XAGE2B | 0          | 0        |
| XAGE3  | 0          | 0        |
| XAGE-4 | 0          | 0        |
| XAGE5  | 0          | 0        |
| XBP1   | 4.49387568 | 4.868888 |
| XBPP1  | 0          | 0        |
| XCL1   | 0.03441134 | 0        |
| XCL2   | 0.03721298 | 0.042275 |
| XCR1   | 0.03062685 | 0        |
| XDH    | 0.00367769 | 0.004178 |
| XG     | 0          | 0.008141 |
| XGPY   | 0          | 0        |
| XGPY2  | 0          | 0        |
| XIAP   | 6.1928884  | 6.004636 |
| XIRP1  | 0          | 0.011108 |
| XIRP2  | 0.00166815 | 0        |
| XIST   | 0          | 0        |
| XK     | 2.98117279 | 1.432637 |
| XKR3   | 0          | 0        |
| XKR4   | 0          | 0.006104 |

|          |            |          |
|----------|------------|----------|
| XKR5     | 0          | 0.005013 |
| XKR6     | 0.06708428 | 0.038104 |
| XKR7     | 0.0072252  | 0.008208 |
| XKR8     | 9.06096283 | 10.7804  |
| XKR9     | 0.00662424 | 0.007525 |
| XKRX     | 0          | 0.008393 |
| XKRY     | 0          | 0        |
| XKRY2    | 0          | 0        |
| XKRYP1   | 0          | 0        |
| XKRYP2   | 0          | 0        |
| XKRYP3   | 0          | 0        |
| XKRYP4   | 0          | 0        |
| XKRYP5   | 0          | 0        |
| XKRYP6   | 0          | 0        |
| XPA      | 5.58194627 | 5.105462 |
| XPC      | 20.1212587 | 19.86681 |
| XPNPEP1  | 3.73783662 | 2.909462 |
| XPNPEP2  | 0          | 0.014332 |
| XPNPEP3  | 1.28488134 | 0.897643 |
| XPO1     | 11.0306809 | 9.707344 |
| XPO4     | 3.07988662 | 2.952717 |
| XPO5     | 2.70068103 | 2.328843 |
| XPO6     | 135.304804 | 119.6308 |
| XPO7     | 17.4604239 | 16.68976 |
| XPOT     | 15.0460486 | 18.30904 |
| XPOTP1   | 0          | 0        |
| XPR1     | 2.31882475 | 2.271559 |
| XRCC1    | 20.3651636 | 20.48756 |
| XRCC2    | 0.1094713  | 0.038863 |
| XRCC3    | 0.43022655 | 0.398236 |
| XRCC4    | 1.20920331 | 0.981196 |
| XRCC5    | 42.1242199 | 40.24954 |
| XRCC6    | 63.4209936 | 58.24025 |
| XRCC6BP1 | 16.3852579 | 17.58438 |
| XRN1     | 28.7171187 | 29.39014 |
| XRN2     | 31.1982859 | 24.51092 |
| XRR1     | 1.23183803 | 1.179688 |
| XYLB     | 0.0113835  | 0.025864 |
| XYLT1    | 22.047771  | 18.72996 |
| XYLT2    | 2.33418308 | 1.901702 |
| YAF2     | 5.65671746 | 6.606892 |
| YAP1     | 0.05471276 | 0.053275 |
| YARS     | 8.33728234 | 7.931052 |
| YARS2    | 1.8140258  | 1.479803 |
| YBX1     | 183.869647 | 171.4444 |
| YBX1P1   | 0          | 0        |
| YBX1P2   | 0          | 0        |



|         |            |          |
|---------|------------|----------|
| YBX2    | 0.02656391 | 0        |
| YDD19   | 0          | 0        |
| YDJC    | 5.79846571 | 5.801689 |
| YEATS2  | 2.28979147 | 1.803967 |
| YEATS4  | 2.21638868 | 1.310663 |
| YES1    | 4.47882184 | 4.338576 |
| YESP    | 0          | 0        |
| YIF1A   | 0.86277005 | 0.894893 |
| YIF1B   | 9.30857164 | 9.492414 |
| YIPF1   | 10.3145332 | 8.950296 |
| YIPF2   | 3.94224956 | 4.621388 |
| YIPF3   | 44.9942083 | 39.74174 |
| YIPF4   | 8.07843505 | 8.71533  |
| YIPF5   | 3.95519994 | 3.565458 |
| YIPF6   | 5.52927464 | 4.500963 |
| YIPF7   | 0          | 0        |
| YJEFN3  | 1.19900054 | 0.948594 |
| YKT6    | 32.0168814 | 30.41336 |
| YLPM1   | 8.08249173 | 8.095752 |
| YME1L1  | 29.8541948 | 28.54113 |
| YME1L2  | 0          | 0        |
| YOD1    | 9.01421212 | 7.838433 |
| YPEL1   | 4.19034601 | 3.389066 |
| YPEL2   | 4.99512354 | 3.916939 |
| YPEL3   | 360.825614 | 380.4493 |
| YPEL4   | 1.50180935 | 1.192868 |
| YPEL5   | 91.61324   | 101.3086 |
| YRDC    | 3.52712524 | 3.668628 |
| YSK4    | 0.0100962  | 0.011469 |
| YTHDC1  | 33.1008491 | 30.22237 |
| YTHDC2  | 7.37860008 | 6.717924 |
| YTHDF1  | 21.9108122 | 22.46801 |
| YTHDF1P | 0          | 0        |
| YTHDF2  | 18.7578933 | 18.8505  |
| YTHDF2P | 0          | 0        |
| YTHDF3  | 14.6708274 | 14.17353 |
| YWHAB   | 61.518561  | 68.43988 |
| YWHAE   | 21.1519203 | 19.87157 |
| YWHAG   | 5.7627475  | 7.088402 |
| YWHAH   | 16.3230679 | 30.47916 |
| YWHAQ   | 29.8781019 | 28.56068 |
| YWHAQP  | 0          | 0        |
| YWHAQP2 | 0          | 0        |
| YWHAZ   | 164.090874 | 182.9229 |
| YWHAZP1 | 0          | 0        |
| YWHAZP3 | 0          | 0        |
| YWHAZP4 | 0          | 0        |

|                |            |          |
|----------------|------------|----------|
| YWHAZP5        | 0          | 0        |
| YY1            | 35.0503299 | 35.92903 |
| YY1AP1         | 44.9429562 | 43.65034 |
| YY2            | 0          | 0        |
| ZACN           | 0.0856429  | 0.032431 |
| ZADH2          | 5.91158077 | 6.028871 |
| ZAK            | 0.09170192 | 0.058144 |
| ZAN            | 0.00481515 | 0.00547  |
| ZAP70          | 0.2066981  | 0.272382 |
| ZAR1           | 0.01462123 | 0.01661  |
| ZBBX           | 0          | 0        |
| ZBED1 (NC_0000 | 0.23791699 | 0.408066 |
| ZBED1 (NC_0000 | 1.32656129 | 2.782144 |
| ZBED1P         | 0          | 0        |
| ZBED2          | 0          | 0        |
| ZBED3          | 0.07408503 | 0.050497 |
| ZBED4          | 6.03646229 | 6.46556  |
| ZBED5          | 11.7284681 | 9.977545 |
| ZBP1           | 11.0059705 | 11.77389 |
| ZBTB1          | 18.5288511 | 22.44813 |
| ZBTB10         | 0.99212088 | 1.166473 |
| ZBTB11         | 15.8583323 | 13.77395 |
| ZBTB12         | 0.19165181 | 0.153684 |
| ZBTB16         | 1.55133316 | 2.234922 |
| ZBTB17         | 13.0768234 | 13.43158 |
| ZBTB2          | 12.2091358 | 18.08024 |
| ZBTB20         | 0.29073813 | 0.306116 |
| ZBTB22         | 6.01714309 | 4.568716 |
| ZBTB24         | 3.15549009 | 3.840736 |
| ZBTB25         | 2.26652268 | 2.165866 |
| ZBTB26         | 4.0839779  | 3.576514 |
| ZBTB3          | 2.40370293 | 1.654449 |
| ZBTB32         | 2.39216776 | 2.291021 |
| ZBTB33         | 8.92032663 | 8.780953 |
| ZBTB34         | 20.4263461 | 19.04914 |
| ZBTB37         | 4.13076549 | 3.356174 |
| ZBTB38         | 9.29667627 | 8.709834 |
| ZBTB39         | 2.37514679 | 2.512388 |
| ZBTB4          | 31.4743459 | 47.44581 |
| ZBTB40         | 8.52751135 | 7.132064 |
| ZBTB41         | 2.88310533 | 2.463487 |
| ZBTB42         | 16.2271389 | 18.62474 |
| ZBTB43         | 5.54316978 | 5.093677 |
| ZBTB44         | 19.3036035 | 19.15513 |
| ZBTB45         | 4.40709531 | 4.437837 |
| ZBTB46         | 0.12492198 | 0.218328 |
| ZBTB47         | 0.28534378 | 0.398085 |

|          |            |          |
|----------|------------|----------|
| ZBTB48   | 41.1513749 | 36.18523 |
| ZBTB5    | 3.13345255 | 3.020311 |
| ZBTB6    | 4.90044855 | 4.496637 |
| ZBTB7A   | 25.6081998 | 29.41402 |
| ZBTB7B   | 50.6968641 | 54.92386 |
| ZBTB7C   | 0.0055711  | 0.006329 |
| ZBTB8A   | 0.01720333 | 0.032572 |
| ZBTB8B   | 0.01569445 | 0.017829 |
| ZBTB8OS  | 5.83548237 | 4.197383 |
| ZBTB9    | 1.7133474  | 0.827876 |
| ZC3H10   | 3.29109377 | 3.085582 |
| ZC3H11A  | 46.2354861 | 41.84143 |
| ZC3H11B  | 0          | 0        |
| ZC3H12A  | 8.95666713 | 15.02933 |
| ZC3H12B  | 0.0176067  | 0.040003 |
| ZC3H12C  | 0.77111183 | 0.545124 |
| ZC3H12D  | 0.176387   | 0.19036  |
| ZC3H13   | 16.8163281 | 16.07745 |
| ZC3H14   | 5.66817787 | 5.054845 |
| ZC3H15   | 15.4882007 | 15.42347 |
| ZC3H18   | 14.8063216 | 14.33777 |
| ZC3H3    | 15.732106  | 17.28882 |
| ZC3H4    | 6.37047943 | 6.034708 |
| ZC3H6    | 1.22081391 | 1.034973 |
| ZC3H7A   | 15.6281914 | 15.69149 |
| ZC3H7B   | 2.24657166 | 2.141031 |
| ZC3H8    | 2.4643156  | 2.665483 |
| ZC3HAV1  | 13.3302041 | 9.955923 |
| ZC3HAV1L | 6.71659175 | 5.42286  |
| ZC3HC1   | 3.63604208 | 3.394331 |
| ZC4H2    | 0.09752009 | 0.066471 |
| ZCCHC10  | 5.13247947 | 4.952615 |
| ZCCHC11  | 42.3643114 | 53.44662 |
| ZCCHC12  | 0.10527021 | 0.054358 |
| ZCCHC13  | 0          | 0        |
| ZCCHC14  | 2.97536879 | 3.300576 |
| ZCCHC16  | 0          | 0        |
| ZCCHC17  | 17.9410908 | 17.3249  |
| ZCCHC18  | 0          | 0        |
| ZCCHC2   | 8.06799187 | 8.868042 |
| ZCCHC24  | 8.78008956 | 12.4098  |
| ZCCHC3   | 18.9144152 | 17.79047 |
| ZCCHC4   | 0.83439819 | 0.478215 |
| ZCCHC5   | 0.01588016 | 0        |
| ZCCHC6   | 24.986895  | 23.8978  |
| ZCCHC7   | 2.29353015 | 2.214219 |
| ZCCHC8   | 12.6563096 | 11.60896 |

|          |            |          |
|----------|------------|----------|
| ZCCHC9   | 6.75017605 | 6.828127 |
| ZCRB1    | 5.00548823 | 4.209686 |
| ZCWPW1   | 8.50189891 | 7.123629 |
| ZCWPW2   | 0.07599517 | 0.057554 |
| ZDBF2    | 0.02072278 | 0.04002  |
| ZDHHC1   | 0.06279342 | 0.035667 |
| ZDHHC11  | 0.05647633 | 0.082489 |
| ZDHHC11B | 0.01297059 | 0.014735 |
| ZDHHC12  | 23.4344835 | 22.43376 |
| ZDHHC13  | 23.2453433 | 23.8066  |
| ZDHHC14  | 0.11316109 | 0.094272 |
| ZDHHC15  | 0.01179873 | 0        |
| ZDHHC16  | 4.32405745 | 3.741477 |
| ZDHHC17  | 18.4120379 | 14.52331 |
| ZDHHC18  | 200.035642 | 188.9102 |
| ZDHHC19  | 2.83063543 | 3.358564 |
| ZDHHC2   | 28.3307426 | 38.97107 |
| ZDHHC20  | 15.9746338 | 18.55727 |
| ZDHHC21  | 0.13780648 | 0.111822 |
| ZDHHC22  | 0          | 0.007009 |
| ZDHHC23  | 0.3839989  | 0.461517 |
| ZDHHC24  | 2.07539334 | 1.922416 |
| ZDHHC3   | 6.72558671 | 6.375136 |
| ZDHHC4   | 11.8121297 | 12.2378  |
| ZDHHC5   | 25.5531544 | 24.6708  |
| ZDHHC6   | 19.5138325 | 17.57812 |
| ZDHHC7   | 51.6899477 | 43.32003 |
| ZDHHC8   | 5.5256152  | 6.083617 |
| ZDHHC8P  | 0          | 0        |
| ZDHHC9   | 0.31198878 | 0.462292 |
| ZEB1     | 6.69997984 | 6.456554 |
| ZEB2     | 32.702709  | 24.85598 |
| ZER1     | 22.8359137 | 21.55513 |
| ZFAND1   | 4.24493575 | 3.716646 |
| ZFAND2A  | 19.38117   | 17.82893 |
| ZFAND2B  | 21.8578557 | 19.37883 |
| ZFAND3   | 29.198345  | 30.17519 |
| ZFAND5   | 36.7943292 | 33.8698  |
| ZFAND6   | 51.4230979 | 53.09384 |
| ZFAT     | 1.10732305 | 1.028936 |
| ZFATAS   | 0          | 0        |
| ZFC3H1   | 15.3445556 | 14.15154 |
| ZFHX2    | 0.00911075 | 0.005175 |
| ZFHX3    | 0.43453747 | 0.355362 |
| ZFHX4    | 0.01216832 | 0.001728 |
| ZFP1     | 1.79047831 | 1.619945 |
| ZFP106   | 13.0554039 | 11.01775 |

|            |            |          |
|------------|------------|----------|
| ZFP112     | 0          | 0        |
| ZFP14      | 2.32582739 | 1.983743 |
| ZFP161     | 5.95360137 | 6.262394 |
| ZFP2       | 0.00874234 | 0.019863 |
| ZFP28      | 0.699644   | 0.479222 |
| ZFP3       | 0.48406668 | 0.392108 |
| ZFP30      | 1.38162552 | 1.295007 |
| ZFP36      | 353.309902 | 558.8294 |
| ZFP36L1    | 0.87663524 | 0.798278 |
| ZFP36L2    | 261.48156  | 319.1472 |
| ZFP37      | 0          | 0        |
| ZFP41      | 0.5535294  | 0.374297 |
| ZFP42      | 0          | 0.009027 |
| ZFP57      | 0          | 0        |
| ZFP62      | 2.14416741 | 2.05743  |
| ZFP64      | 0.2826439  | 0.249203 |
| ZFP82      | 0.61886486 | 0.419998 |
| ZFP90      | 3.93745363 | 3.225361 |
| ZFP91      | 47.2818062 | 48.65841 |
| ZFP91-CNTF | 0          | 0        |
| ZFP92      | 0.21848865 | 0.324578 |
| ZFPL1      | 16.8991477 | 14.68262 |
| ZFPM1      | 10.1915443 | 13.92131 |
| ZFPM2      | 0          | 0        |
| ZFR        | 14.9473827 | 14.08284 |
| ZFR2       | 0          | 0        |
| ZFX        | 10.4891472 | 10.34569 |
| ZFY        | 0.08985184 | 0.063796 |
| ZFYVE1     | 10.7055153 | 9.270842 |
| ZFYVE16    | 9.66280437 | 8.742003 |
| ZFYVE19    | 7.07627725 | 5.474766 |
| ZFYVE20    | 5.62942374 | 4.817796 |
| ZFYVE21    | 4.98648486 | 3.834052 |
| ZFYVE26    | 3.1119663  | 2.34037  |
| ZFYVE27    | 22.8476183 | 23.03823 |
| ZFYVE28    | 0.11766    | 0.122041 |
| ZFYVE9     | 0.1858821  | 0.234628 |
| ZG16       | 0          | 0        |
| ZG16B      | 0.78718027 | 0.403855 |
| ZGPAT      | 17.9397697 | 17.43635 |
| ZHX1       | 3.79000981 | 2.800487 |
| ZHX2       | 27.4404927 | 26.68513 |
| ZHX3       | 0.52189792 | 0.511602 |
| ZIC1       | 0.00401937 | 0.013698 |
| ZIC2       | 0.01567884 | 0        |
| ZIC3       | 0          | 0.006064 |
| ZIC4       | 0          | 0.005844 |

|          |            |          |
|----------|------------|----------|
| ZIC5     | 0.00457371 | 0        |
| ZIK1     | 1.58711392 | 1.329926 |
| ZIM2     | 0.01009377 | 0.0344   |
| ZIM3     | 0.00800355 | 0        |
| ZKSCAN1  | 7.87588845 | 7.282046 |
| ZKSCAN2  | 1.15069872 | 0.931808 |
| ZKSCAN3  | 1.83227285 | 1.498674 |
| ZKSCAN4  | 4.72748036 | 4.743587 |
| ZKSCAN5  | 3.36177379 | 3.177129 |
| ZMAT1    | 1.90615929 | 1.621488 |
| ZMAT2    | 45.5548837 | 45.38487 |
| ZMAT3    | 1.60736192 | 1.678731 |
| ZMAT4    | 0.00851573 | 0        |
| ZMAT5    | 12.2325498 | 13.01773 |
| ZMIZ1    | 102.335337 | 126.0268 |
| ZMIZ2    | 8.30549621 | 8.44151  |
| ZMPSTE24 | 4.98634989 | 4.316586 |
| ZMYM1    | 1.28067963 | 1.065379 |
| ZMYM2    | 17.8173257 | 18.40486 |
| ZMYM3    | 6.17019113 | 5.221794 |
| ZMYM4    | 2.52821037 | 2.025146 |
| ZMYM5    | 5.58494818 | 5.10595  |
| ZMYM6    | 14.617611  | 12.77586 |
| ZMYND10  | 1.41117563 | 1.374101 |
| ZMYND11  | 26.2503042 | 28.23134 |
| ZMYND12  | 0.07554011 | 0.014302 |
| ZMYND15  | 4.49110139 | 4.032036 |
| ZMYND17  | 1.96109154 | 1.98139  |
| ZMYND19  | 1.71885917 | 1.098366 |
| ZMYND8   | 6.11958257 | 4.615803 |
| ZNF10    | 2.38175713 | 2.055041 |
| ZNF100   | 4.92472517 | 4.285427 |
| ZNF101   | 5.27808308 | 4.991164 |
| ZNF107   | 0.92758813 | 0.945344 |
| ZNF108P  | 0          | 0        |
| ZNF114   | 0.01906195 | 0.032482 |
| ZNF117   | 4.02514924 | 3.804312 |
| ZNF12    | 7.30467256 | 7.227333 |
| ZNF121   | 2.57800472 | 2.030718 |
| ZNF123P  | 0          | 0        |
| ZNF124   | 2.32358795 | 4.309022 |
| ZNF131   | 9.28945264 | 8.752928 |
| ZNF132   | 0.1526088  | 0.165486 |
| ZNF133   | 1.71983179 | 1.645732 |
| ZNF134   | 3.60086851 | 3.782517 |
| ZNF135   | 0.06950523 | 0.110543 |
| ZNF136   | 5.24394825 | 5.024636 |

|        |            |          |
|--------|------------|----------|
| ZNF137 | 0          | 0        |
| ZNF138 | 0.49970518 | 0.449854 |
| ZNF14  | 3.45573276 | 3.176083 |
| ZNF140 | 5.40200874 | 4.882936 |
| ZNF141 | 4.45603847 | 4.276627 |
| ZNF142 | 5.23441027 | 4.800777 |
| ZNF143 | 11.0265229 | 10.41832 |
| ZNF146 | 7.02661437 | 6.155509 |
| ZNF148 | 8.62340411 | 8.46979  |
| ZNF154 | 0.74243069 | 0.834718 |
| ZNF155 | 4.5543085  | 4.37849  |
| ZNF157 | 0.0496173  | 0.084549 |
| ZNF16  | 0.60279045 | 0.46565  |
| ZNF160 | 7.04561944 | 6.395436 |
| ZNF165 | 1.37243147 | 1.069618 |
| ZNF167 | 0.30141948 | 0.258315 |
| ZNF169 | 2.41826782 | 2.310596 |
| ZNF17  | 1.95493182 | 1.748126 |
| ZNF174 | 6.0771957  | 5.198363 |
| ZNF175 | 0.17775709 | 0.13883  |
| ZNF177 | 0.26353276 | 0.286361 |
| ZNF18  | 2.96345467 | 2.494686 |
| ZNF180 | 2.65845254 | 2.423681 |
| ZNF181 | 2.45093658 | 2.128697 |
| ZNF182 | 7.20214436 | 6.721438 |
| ZNF184 | 4.49380865 | 3.772954 |
| ZNF185 | 1.7699896  | 1.318334 |
| ZNF187 | 3.4855625  | 2.721732 |
| ZNF189 | 4.65179084 | 4.229052 |
| ZNF19  | 0.16863189 | 0.130615 |
| ZNF192 | 10.2891586 | 9.693025 |
| ZNF193 | 10.5576188 | 9.556962 |
| ZNF195 | 4.54601751 | 4.598256 |
| ZNF197 | 0.67780776 | 0.479363 |
| ZNF2   | 1.59113489 | 1.354155 |
| ZNF20  | 2.37107534 | 2.48952  |
| ZNF200 | 6.58694075 | 6.470788 |
| ZNF202 | 1.0110825  | 0.700944 |
| ZNF204 | 0          | 0        |
| ZNF205 | 0.17351001 | 0.046379 |
| ZNF207 | 41.6343187 | 38.71177 |
| ZNF208 | 0.03826962 | 0.014492 |
| ZNF211 | 14.2791459 | 11.71435 |
| ZNF212 | 6.69779912 | 6.679223 |
| ZNF213 | 4.18367597 | 4.066615 |
| ZNF214 | 0          | 0        |
| ZNF215 | 0          | 0        |

|         |            |          |
|---------|------------|----------|
| ZNF217  | 61.4790378 | 51.34769 |
| ZNF219  | 3.50623691 | 5.864831 |
| ZNF22   | 3.29117023 | 2.633431 |
| ZNF221  | 0.18199998 | 0.246137 |
| ZNF222  | 2.24745068 | 2.246205 |
| ZNF223  | 2.35163188 | 2.335081 |
| ZNF224  | 16.6173439 | 15.52629 |
| ZNF225  | 2.37122004 | 1.854135 |
| ZNF226  | 3.61906156 | 3.43097  |
| ZNF227  | 5.94900097 | 6.255811 |
| ZNF229  | 0.13977355 | 0.096233 |
| ZNF23   | 0.95982387 | 0.729373 |
| ZNF230  | 3.08357952 | 3.474093 |
| ZNF232  | 0.55649336 | 0.4023   |
| ZNF233  | 0.05290342 | 0.103027 |
| ZNF234  | 2.13452816 | 1.838115 |
| ZNF235  | 1.27206548 | 1.250412 |
| ZNF236  | 2.37065524 | 2.028647 |
| ZNF238  | 86.8835944 | 71.17577 |
| ZNF239  | 0.01675993 | 0.00952  |
| ZNF24   | 25.8427337 | 26.70848 |
| ZNF248  | 0.64156754 | 0.572303 |
| ZNF25   | 6.37063026 | 5.280808 |
| ZNF250  | 1.14311196 | 0.979575 |
| ZNF251  | 1.72006366 | 1.858702 |
| ZNF252  | 0          | 0        |
| ZNF253  | 1.96802153 | 1.866505 |
| ZNF254  | 2.06771945 | 2.043357 |
| ZNF256  | 0.41860387 | 0.594426 |
| ZNF257  | 0.11939427 | 0.12207  |
| ZNF259  | 10.0869557 | 8.973708 |
| ZNF259P | 0          | 0        |
| ZNF26   | 3.29916929 | 3.19353  |
| ZNF260  | 1.66923421 | 1.714624 |
| ZNF263  | 3.92865283 | 3.205518 |
| ZNF264  | 4.18535819 | 4.126181 |
| ZNF266  | 31.2197847 | 27.48678 |
| ZNF267  | 15.7850923 | 14.58996 |
| ZNF268  | 1.74109135 | 1.414579 |
| ZNF271  | 0          | 0        |
| ZNF273  | 1.51674064 | 1.579455 |
| ZNF274  | 22.9589502 | 20.67855 |
| ZNF275  | 1.49057737 | 1.566786 |
| ZNF276  | 35.5714535 | 51.52338 |
| ZNF277  | 2.04228187 | 1.564488 |
| ZNF28   | 1.8034562  | 1.834172 |
| ZNF280A | 0          | 0        |



|         |            |          |
|---------|------------|----------|
| ZNF280B | 0.00733484 | 0        |
| ZNF280C | 0.41252805 | 0.360491 |
| ZNF280D | 2.88003955 | 2.557427 |
| ZNF281  | 12.4026164 | 13.53331 |
| ZNF282  | 20.7371579 | 26.33717 |
| ZNF283  | 1.20496049 | 1.015001 |
| ZNF284  | 2.05682585 | 1.644265 |
| ZNF285A | 0.07044973 | 0.062247 |
| ZNF285B | 0          | 0        |
| ZNF286A | 0.18576293 | 0.193803 |
| ZNF286B | 0.11838587 | 0.071727 |
| ZNF287  | 0.01965903 | 0.01675  |
| ZNF29   | 0          | 0        |
| ZNF292  | 6.04322136 | 5.271278 |
| ZNF295  | 1.68112688 | 1.877851 |
| ZNF296  | 1.98852437 | 2.048156 |
| ZNF299P | 0          | 0        |
| ZNF3    | 10.0617581 | 9.381365 |
| ZNF30   | 0.19812788 | 0.306104 |
| ZNF300  | 0.4673801  | 0.361662 |
| ZNF302  | 6.05189664 | 4.980997 |
| ZNF304  | 0.99009935 | 1.200474 |
| ZNF311  | 0.00779293 | 0        |
| ZNF316  | 0          | 0        |
| ZNF317  | 12.3250147 | 11.69147 |
| ZNF318  | 3.99181902 | 3.65765  |
| ZNF319  | 3.55238412 | 3.741246 |
| ZNF32   | 5.605659   | 4.201837 |
| ZNF320  | 1.04014656 | 0.93286  |
| ZNF321  | 1.18909327 | 1.514566 |
| ZNF322A | 6.96464088 | 6.389267 |
| ZNF322B | 0.1151345  | 0.09055  |
| ZNF323  | 0.55367828 | 0.459434 |
| ZNF324  | 3.1467912  | 2.826405 |
| ZNF324B | 0.63883309 | 0.566225 |
| ZNF326  | 5.79417133 | 5.326763 |
| ZNF329  | 2.78448567 | 2.428401 |
| ZNF330  | 8.72812523 | 7.022803 |
| ZNF331  | 1.53255589 | 1.479646 |
| ZNF333  | 4.49306913 | 3.988249 |
| ZNF334  | 0.00604697 | 0        |
| ZNF335  | 13.1951426 | 12.25909 |
| ZNF337  | 5.24153543 | 4.198759 |
| ZNF33A  | 18.2498911 | 15.88178 |
| ZNF33B  | 1.33040446 | 1.130514 |
| ZNF34   | 3.74483179 | 3.785611 |
| ZNF341  | 2.56793095 | 2.204114 |

|          |            |          |
|----------|------------|----------|
| ZNF343   | 1.4124947  | 1.183733 |
| ZNF345   | 2.65767738 | 2.39081  |
| ZNF346   | 1.90767747 | 1.300291 |
| ZNF347   | 0.8105139  | 0.65476  |
| ZNF35    | 0.84133072 | 0.775432 |
| ZNF350   | 12.2056492 | 11.31507 |
| ZNF354A  | 6.64087753 | 5.646421 |
| ZNF354B  | 0.55506108 | 0.500098 |
| ZNF354C  | 0.65455385 | 0.633051 |
| ZNF358   | 3.83257441 | 3.730137 |
| ZNF362   | 25.3035052 | 28.38375 |
| ZNF365   | 0.00852263 | 0        |
| ZNF366   | 0.03795186 | 0.025868 |
| ZNF367   | 0.20434987 | 0.386908 |
| ZNF37A   | 1.23696035 | 1.20106  |
| ZNF37B   | 0          | 0        |
| ZNF382   | 0.53067846 | 0.416058 |
| ZNF383   | 5.01430561 | 4.370947 |
| ZNF384   | 22.9781481 | 22.67113 |
| ZNF385A  | 0.21289319 | 0.619136 |
| ZNF385B  | 0.01104272 | 0.006272 |
| ZNF385C  | 0.03882794 | 0.044109 |
| ZNF385D  | 0          | 0        |
| ZNF389   | 0.33332842 | 0.305846 |
| ZNF391   | 0.0395213  | 0.029931 |
| ZNF394   | 22.3093955 | 20.06572 |
| ZNF395   | 11.8962566 | 9.316287 |
| ZNF396   | 0.46002338 | 0.693936 |
| ZNF397   | 9.85542351 | 8.384191 |
| ZNF397OS | 0.41904906 | 0.300116 |
| ZNF398   | 0.55396515 | 0.629313 |
| ZNF402P  | 0          | 0        |
| ZNF404   | 0.24989588 | 0.090327 |
| ZNF405P  | 0          | 0        |
| ZNF407   | 2.53889798 | 2.272784 |
| ZNF408   | 4.54787986 | 4.941409 |
| ZNF41    | 2.92672607 | 2.653294 |
| ZNF410   | 19.2683933 | 18.61021 |
| ZNF414   | 2.30243438 | 1.96677  |
| ZNF415   | 1.13946996 | 1.083508 |
| ZNF416   | 0.80447659 | 0.771102 |
| ZNF417   | 6.5941661  | 5.57133  |
| ZNF418   | 0.75700298 | 0.756513 |
| ZNF419   | 4.78090789 | 4.300531 |
| ZNF420   | 1.98697833 | 1.736953 |
| ZNF423   | 0.00436391 | 0.004957 |
| ZNF425   | 0.14637889 | 0.15873  |

|        |            |          |
|--------|------------|----------|
| ZNF426 | 1.78688102 | 1.545628 |
| ZNF428 | 3.34596665 | 3.184681 |
| ZNF429 | 1.37141083 | 1.143167 |
| ZNF43  | 1.67654546 | 1.547473 |
| ZNF430 | 5.77025882 | 5.97804  |
| ZNF431 | 6.12282129 | 6.340795 |
| ZNF432 | 3.88147385 | 3.703909 |
| ZNF433 | 0.57975923 | 0.545416 |
| ZNF434 | 6.23049946 | 5.657623 |
| ZNF436 | 2.78212211 | 2.545297 |
| ZNF438 | 1.67720315 | 1.145688 |
| ZNF439 | 5.85411176 | 5.301558 |
| ZNF44  | 17.0216386 | 20.21948 |
| ZNF440 | 3.21841947 | 2.919228 |
| ZNF441 | 2.67070863 | 2.760105 |
| ZNF442 | 0.12652412 | 0.050729 |
| ZNF443 | 0.57614458 | 0.690373 |
| ZNF444 | 3.64315573 | 3.402137 |
| ZNF445 | 7.811929   | 6.751406 |
| ZNF446 | 3.26989696 | 2.867665 |
| ZNF449 | 8.77479937 | 6.820114 |
| ZNF45  | 4.68636895 | 4.695234 |
| ZNF451 | 10.9439235 | 9.948711 |
| ZNF454 | 0          | 0        |
| ZNF460 | 1.05973349 | 1.011502 |
| ZNF461 | 1.84432728 | 1.638734 |
| ZNF462 | 0.00506269 | 0.002876 |
| ZNF467 | 6.88856238 | 7.846468 |
| ZNF468 | 3.56246615 | 3.555214 |
| ZNF469 | 2.51609656 | 4.026983 |
| ZNF470 | 0.27970963 | 0.187308 |
| ZNF471 | 0.08466008 | 0.033661 |
| ZNF473 | 0.67664641 | 0.636325 |
| ZNF474 | 0.01074365 | 0        |
| ZNF479 | 0.01014736 | 0        |
| ZNF48  | 3.56943885 | 3.241783 |
| ZNF480 | 1.04638931 | 1.072866 |
| ZNF483 | 0.00404256 | 0        |
| ZNF484 | 3.16076653 | 2.740914 |
| ZNF485 | 0.13300696 | 0.069738 |
| ZNF486 | 1.02225656 | 1.490858 |
| ZNF487 | 0          | 0        |
| ZNF488 | 0.00601411 | 0        |
| ZNF490 | 4.92705771 | 6.686107 |
| ZNF491 | 0.03723934 | 0.016922 |
| ZNF492 | 0.08743411 | 0.081798 |
| ZNF493 | 1.85330682 | 1.664547 |

|         |            |          |
|---------|------------|----------|
| ZNF496  | 1.19501469 | 1.101784 |
| ZNF497  | 0.39430078 | 0.330781 |
| ZNF498  | 5.02601396 | 4.728802 |
| ZNF500  | 1.46116999 | 0.932783 |
| ZNF501  | 0.69329364 | 0.506867 |
| ZNF502  | 0.19271614 | 0.175143 |
| ZNF503  | 0.35680951 | 0.668062 |
| ZNF506  | 6.20512926 | 6.488644 |
| ZNF507  | 2.15211343 | 1.581406 |
| ZNF509  | 8.69447087 | 6.476492 |
| ZNF510  | 1.68072106 | 1.339309 |
| ZNF511  | 17.1512191 | 18.64365 |
| ZNF512  | 7.48712895 | 6.797426 |
| ZNF512B | 0.79568747 | 0.718288 |
| ZNF513  | 12.2746197 | 11.30517 |
| ZNF514  | 0.72840566 | 0.492015 |
| ZNF516  | 18.4011746 | 16.46884 |
| ZNF517  | 1.08953535 | 1.012688 |
| ZNF518A | 4.21773969 | 3.700104 |
| ZNF518B | 7.47830039 | 6.945828 |
| ZNF519  | 0.05341802 | 0.048547 |
| ZNF521  | 0.05921437 | 0.024024 |
| ZNF524  | 2.97653468 | 1.550701 |
| ZNF525  | 0          | 0        |
| ZNF526  | 1.43572063 | 1.238353 |
| ZNF527  | 0.5004078  | 0.442662 |
| ZNF528  | 2.10359018 | 1.855329 |
| ZNF529  | 2.4333608  | 2.116514 |
| ZNF530  | 1.62442672 | 1.353812 |
| ZNF532  | 0.02276877 | 0.018475 |
| ZNF534  | 0          | 0        |
| ZNF536  | 0.00426045 | 0.00968  |
| ZNF540  | 0.72049421 | 0.719282 |
| ZNF541  | 0.00453915 | 0.005157 |
| ZNF542  | 0          | 0        |
| ZNF543  | 0.73551308 | 0.548333 |
| ZNF544  | 1.47273104 | 1.230981 |
| ZNF546  | 0.16479685 | 0.197612 |
| ZNF547  | 0.80284045 | 0.774373 |
| ZNF548  | 3.15286684 | 2.910578 |
| ZNF549  | 2.63809897 | 2.527525 |
| ZNF550  | 2.40341916 | 2.1259   |
| ZNF551  | 1.3880911  | 1.184279 |
| ZNF552  | 14.9555182 | 16.1976  |
| ZNF554  | 0.27859416 | 0.271275 |
| ZNF555  | 1.15221261 | 1.181514 |
| ZNF556  | 0.01288317 | 0        |

|         |            |          |
|---------|------------|----------|
| ZNF557  | 1.45376747 | 1.3411   |
| ZNF558  | 1.75792415 | 1.370977 |
| ZNF559  | 4.61852058 | 3.345957 |
| ZNF56   | 0.04988216 | 0.070834 |
| ZNF560  | 0.24762167 | 0.204583 |
| ZNF561  | 3.95035403 | 3.614333 |
| ZNF562  | 3.88053847 | 3.649572 |
| ZNF563  | 0.10565493 | 0.042866 |
| ZNF564  | 5.61293605 | 5.971277 |
| ZNF565  | 1.60918948 | 1.864145 |
| ZNF566  | 0.50893388 | 0.456202 |
| ZNF567  | 2.99468269 | 2.575932 |
| ZNF568  | 1.75572351 | 1.67442  |
| ZNF569  | 1.50735928 | 1.324008 |
| ZNF57   | 0.2099384  | 0.262343 |
| ZNF570  | 1.9649842  | 1.626356 |
| ZNF571  | 1.41339    | 1.164871 |
| ZNF572  | 0.37866133 | 0.335383 |
| ZNF573  | 0.4707791  | 0.353358 |
| ZNF574  | 6.34118608 | 6.356644 |
| ZNF575  | 0.11020849 | 0.097377 |
| ZNF576  | 1.77851609 | 1.672074 |
| ZNF577  | 2.92757773 | 2.592593 |
| ZNF578  | 0.50840067 | 0.375585 |
| ZNF579  | 1.96870027 | 2.060201 |
| ZNF580  | 12.0925651 | 12.32878 |
| ZNF581  | 6.25958059 | 5.747233 |
| ZNF582  | 1.61099619 | 1.310198 |
| ZNF583  | 0.73744341 | 0.502648 |
| ZNF584  | 0.5114521  | 0.380302 |
| ZNF585A | 3.5242746  | 3.098116 |
| ZNF585B | 1.81289482 | 1.745729 |
| ZNF586  | 10.6313186 | 9.456994 |
| ZNF587  | 8.47770832 | 7.648818 |
| ZNF589  | 2.21187731 | 2.022959 |
| ZNF592  | 20.4237993 | 24.33776 |
| ZNF593  | 0.12958602 | 0.073606 |
| ZNF594  | 0.18106703 | 0.132233 |
| ZNF595  | 3.58753899 | 3.340575 |
| ZNF596  | 0.31617039 | 0.351366 |
| ZNF597  | 9.03626745 | 8.36585  |
| ZNF598  | 8.7391673  | 8.671902 |
| ZNF599  | 0.09449587 | 0.061342 |
| ZNF600  | 1.73285695 | 1.490476 |
| ZNF606  | 0.9751455  | 0.932571 |
| ZNF607  | 0.40581981 | 0.32381  |
| ZNF608  | 0.07449187 | 0.021156 |

|         |            |          |
|---------|------------|----------|
| ZNF609  | 8.42184294 | 7.57184  |
| ZNF610  | 0.04533764 | 0        |
| ZNF611  | 2.61399611 | 2.469567 |
| ZNF613  | 2.65301135 | 2.100869 |
| ZNF614  | 1.8525313  | 1.757159 |
| ZNF615  | 5.18725621 | 4.885994 |
| ZNF616  | 1.69748323 | 1.740234 |
| ZNF618  | 0.04383642 | 0.028831 |
| ZNF619  | 2.27740529 | 1.838738 |
| ZNF620  | 0.91010708 | 0.822897 |
| ZNF621  | 3.85319704 | 3.251786 |
| ZNF622  | 12.3393343 | 12.25312 |
| ZNF623  | 2.97690383 | 3.404776 |
| ZNF624  | 1.48443305 | 1.139266 |
| ZNF625  | 0.10023996 | 0.056937 |
| ZNF626  | 0.36611273 | 0.405425 |
| ZNF627  | 4.2946294  | 4.128188 |
| ZNF628  | 2.55233417 | 1.899881 |
| ZNF629  | 2.36953787 | 2.483863 |
| ZNF630  | 0.70195859 | 0.474664 |
| ZNF638  | 11.8889394 | 11.58288 |
| ZNF639  | 3.30069085 | 2.7825   |
| ZNF641  | 19.8231087 | 21.74921 |
| ZNF642  | 0.49666136 | 0.331891 |
| ZNF643  | 0.1489649  | 0.04835  |
| ZNF644  | 5.45208084 | 5.398436 |
| ZNF645  | 0          | 0        |
| ZNF646  | 20.7374519 | 20.76096 |
| ZNF648  | 0.01152389 | 0.013091 |
| ZNF649  | 3.98744838 | 4.032355 |
| ZNF652  | 12.5864441 | 11.97667 |
| ZNF653  | 1.44598001 | 1.675953 |
| ZNF654  | 4.73356251 | 4.775094 |
| ZNF655  | 31.2826001 | 29.1585  |
| ZNF658  | 0.45968425 | 0.172091 |
| ZNF658B | 0.03114864 | 0.021231 |
| ZNF66   | 0.47170201 | 0.557295 |
| ZNF660  | 0.07628238 | 0.064993 |
| ZNF662  | 0.08574477 | 0.044645 |
| ZNF663  | 0          | 0        |
| ZNF664  | 4.39193973 | 5.059453 |
| ZNF665  | 0.15971841 | 0.174185 |
| ZNF667  | 0.03160753 | 0.007181 |
| ZNF668  | 6.76014451 | 7.233776 |
| ZNF669  | 1.80520518 | 1.966299 |
| ZNF670  | 0.53480892 | 0.726679 |
| ZNF671  | 7.87802048 | 6.771046 |

|          |            |          |
|----------|------------|----------|
| ZNF672   | 13.7495352 | 14.28551 |
| ZNF673   | 3.10390043 | 2.344315 |
| ZNF674   | 0.60988316 | 0.728367 |
| ZNF675   | 3.55974368 | 4.18449  |
| ZNF676   | 0.02866439 | 0.040704 |
| ZNF677   | 0.3250409  | 0.266682 |
| ZNF678   | 0.95039165 | 0.890246 |
| ZNF679   | 0.02683514 | 0        |
| ZNF67P   | 0          | 0        |
| ZNF680   | 0.65918179 | 0.471673 |
| ZNF681   | 0.09061248 | 0.117643 |
| ZNF682   | 0.03834407 | 0.058079 |
| ZNF683   | 0.0381585  | 0.028899 |
| ZNF684   | 0.74266085 | 0.729664 |
| ZNF687   | 13.34838   | 12.06972 |
| ZNF688   | 4.47031235 | 3.54575  |
| ZNF689   | 3.42955435 | 3.036094 |
| ZNF69    | 1.07659827 | 1.35253  |
| ZNF691   | 3.4131165  | 2.711119 |
| ZNF692   | 6.11394492 | 4.997016 |
| ZNF695   | 0.01890201 | 0.014315 |
| ZNF696   | 0.53842077 | 0.423061 |
| ZNF697   | 0          | 0        |
| ZNF699   | 3.71507758 | 3.034116 |
| ZNF7     | 5.5482215  | 5.708658 |
| ZNF70    | 0.40302477 | 0.475681 |
| ZNF700   | 12.6665694 | 11.35481 |
| ZNF701   | 6.29878979 | 5.254057 |
| ZNF702P  | 0          | 0        |
| ZNF703   | 1.16055185 | 1.032751 |
| ZNF704   | 0.0048862  | 0.005551 |
| ZNF705A  | 0.00611557 | 0.006947 |
| ZNF705CP | 0          | 0        |
| ZNF705D  | 0.0114175  | 0.006485 |
| ZNF705G  | 0          | 0        |
| ZNF706   | 4.60204797 | 4.384504 |
| ZNF707   | 7.17399744 | 7.209416 |
| ZNF708   | 3.65566584 | 4.194662 |
| ZNF709   | 0.29796377 | 0.395701 |
| ZNF71    | 1.73141889 | 1.479001 |
| ZNF710   | 19.6386586 | 20.74254 |
| ZNF711   | 0.08073081 | 0.080248 |
| ZNF713   | 0.71272308 | 1.145097 |
| ZNF714   | 0.8302936  | 0.826343 |
| ZNF716   | 0.06252887 | 0.071034 |
| ZNF717   | 0.39748018 | 0.350336 |
| ZNF718   | 1.92991309 | 1.948811 |

|            |            |          |
|------------|------------|----------|
| ZNF720     | 1.40219403 | 1.541253 |
| ZNF720P1   | 0          | 0        |
| ZNF721     | 6.73054598 | 6.329323 |
| ZNF724P    | 0          | 0        |
| ZNF725     | 0          | 0        |
| ZNF726     | 0.09578738 | 0.04534  |
| ZNF727     | 0.05671573 | 0.055226 |
| ZNF728     | 0          | 0        |
| ZNF730     | 0.01168074 | 0.053078 |
| ZNF732     | 0          | 0        |
| ZNF735     | 0.0169696  | 0.038555 |
| ZNF736P10Y | 0          | 0        |
| ZNF736P11Y | 0          | 0        |
| ZNF736P12Y | 0          | 0        |
| ZNF736P1Y  | 0          | 0        |
| ZNF736P2Y  | 0          | 0        |
| ZNF736P3Y  | 0          | 0        |
| ZNF736P6Y  | 0          | 0        |
| ZNF736P7Y  | 0          | 0        |
| ZNF736P8Y  | 0          | 0        |
| ZNF736P9Y  | 0          | 0        |
| ZNF737     | 1.61269564 | 1.712194 |
| ZNF738     | 0          | 0        |
| ZNF74      | 0.66859248 | 0.506354 |
| ZNF740     | 15.0427944 | 13.74965 |
| ZNF746     | 14.0548529 | 18.69663 |
| ZNF747     | 5.20534343 | 4.956336 |
| ZNF749     | 0.10767496 | 0.016309 |
| ZNF750     | 0          | 0        |
| ZNF75A     | 3.9001791  | 3.28364  |
| ZNF75B     | 0          | 0        |
| ZNF75D     | 13.6182489 | 11.18779 |
| ZNF76      | 8.02814183 | 6.104072 |
| ZNF761     | 2.1564442  | 1.831645 |
| ZNF763     | 2.28657445 | 1.819214 |
| ZNF764     | 6.83438442 | 6.472882 |
| ZNF765     | 2.16362921 | 1.795167 |
| ZNF766     | 7.357099   | 6.752059 |
| ZNF767     | 6.24786823 | 6.914468 |
| ZNF768     | 11.7614702 | 11.74136 |
| ZNF77      | 0.98942734 | 1.01863  |
| ZNF770     | 5.19504291 | 5.030771 |
| ZNF771     | 0.15895439 | 0.164159 |
| ZNF772     | 0.41127239 | 0.370243 |
| ZNF773     | 0.09543954 | 0.281894 |
| ZNF774     | 0.37749506 | 0.350869 |
| ZNF775     | 0.93343228 | 0.671933 |



|         |            |          |
|---------|------------|----------|
| ZNF776  | 8.66122855 | 7.81276  |
| ZNF777  | 1.23195299 | 1.352868 |
| ZNF778  | 1.66936235 | 1.438665 |
| ZNF780A | 2.92399701 | 2.497644 |
| ZNF780B | 0.73109664 | 0.410495 |
| ZNF781  | 0.02676681 | 0.015204 |
| ZNF782  | 0.78059635 | 0.677694 |
| ZNF783  | 0          | 0        |
| ZNF784  | 3.84481253 | 3.422415 |
| ZNF785  | 1.03706471 | 0.7579   |
| ZNF786  | 0.75917658 | 0.694335 |
| ZNF787  | 32.0021921 | 38.06728 |
| ZNF788  | 0          | 0        |
| ZNF789  | 2.74864259 | 2.541257 |
| ZNF79   | 2.84235059 | 2.553394 |
| ZNF790  | 0.69968976 | 0.464323 |
| ZNF791  | 11.8651968 | 16.59991 |
| ZNF792  | 11.0480327 | 14.75004 |
| ZNF793  | 0.12991357 | 0.140876 |
| ZNF799  | 0.69752283 | 0.688631 |
| ZNF8    | 5.24206215 | 5.036408 |
| ZNF80   | 0.01642604 | 0.00933  |
| ZNF800  | 9.43201725 | 9.56649  |
| ZNF804A | 0.00897559 | 0.025491 |
| ZNF804B | 0.00458268 | 0        |
| ZNF805  | 2.04107252 | 1.927132 |
| ZNF806  | 0          | 0        |
| ZNF808  | 4.63560604 | 3.953198 |
| ZNF81   | 2.41978157 | 1.954045 |
| ZNF812  | 0.01834671 | 0.020842 |
| ZNF813  | 0.56228201 | 0.404929 |
| ZNF814  | 1.05076459 | 0.973196 |
| ZNF815  | 0          | 0        |
| ZNF816A | 3.27424509 | 3.817012 |
| ZNF818P | 0          | 0        |
| ZNF821  | 0.34619096 | 0.353951 |
| ZNF823  | 2.21226864 | 2.622874 |
| ZNF826  | 0.23988335 | 0.217    |
| ZNF827  | 0.02504805 | 0.045528 |
| ZNF828  | 3.05152331 | 2.749137 |
| ZNF829  | 0.36170103 | 0.437408 |
| ZNF83   | 8.82367833 | 8.008217 |
| ZNF830  | 17.5486015 | 15.1354  |
| ZNF831  | 0.6841505  | 0.375903 |
| ZNF833  | 0.03145935 | 0.023826 |
| ZNF835  | 0.31287695 | 0.227477 |
| ZNF836  | 1.62121514 | 1.440416 |

|          |            |          |
|----------|------------|----------|
| ZNF837   | 0.13444629 | 0.09399  |
| ZNF839   | 1.3936646  | 1.122651 |
| ZNF839P1 | 0          | 0        |
| ZNF84    | 1.3953147  | 1.249072 |
| ZNF840   | 0          | 0        |
| ZNF841   | 7.24169681 | 6.747728 |
| ZNF843   | 0.16711639 | 0.13052  |
| ZNF844   | 2.64114955 | 2.38514  |
| ZNF845   | 3.15550664 | 3.030655 |
| ZNF846   | 1.0152879  | 0.739061 |
| ZNF847P  | 0          | 0        |
| ZNF849P  | 0          | 0        |
| ZNF85    | 0.67353874 | 0.692772 |
| ZNF850P  | 0          | 0        |
| ZNF852   | 6.27987826 | 5.305111 |
| ZNF853   | 2.24473908 | 2.757001 |
| ZNF860   | 0.06108069 | 0.00771  |
| ZNF862   | 2.60949446 | 2.237173 |
| ZNF884P  | 0          | 0        |
| ZNF885P  | 0          | 0        |
| ZNF886P  | 0          | 0        |
| ZNF90    | 0.10644319 | 0.04455  |
| ZNF91    | 1.68327335 | 1.54483  |
| ZNF92    | 4.17940908 | 4.210959 |
| ZNF93    | 2.99508974 | 2.498159 |
| ZNF98    | 0.08372919 | 0.031706 |
| ZNF99    | 0.02027515 | 0.007678 |
| ZNFX1    | 20.3293357 | 20.94605 |
| ZNHIT1   | 20.7777661 | 19.92769 |
| ZNHIT2   | 1.23296694 | 1.253231 |
| ZNHIT3   | 11.0531908 | 9.849788 |
| ZNHIT6   | 0.56378256 | 0.418438 |
| ZNRD1    | 16.7664164 | 18.32397 |
| ZNRF1    | 6.07206838 | 7.150582 |
| ZNRF2    | 11.7036958 | 11.71475 |
| ZNRF3    | 3.03438502 | 3.604128 |
| ZNRF4    | 0          | 0.033128 |
| ZP1      | 0.01066193 | 0.012112 |
| ZP2      | 0          | 0        |
| ZP3      | 0.69461068 | 0.515943 |
| ZP4      | 0          | 0        |
| ZPBP     | 0.01786349 | 0        |
| ZPBP2    | 0          | 0.010583 |
| ZPLD1    | 0.00580971 | 0        |
| ZRANB1   | 18.0940373 | 19.11485 |
| ZRANB2   | 22.7330086 | 21.91242 |
| ZRANB3   | 0.07959833 | 0.077507 |

|           |            |          |
|-----------|------------|----------|
| ZRF1PS    | 0          | 0        |
| ZRSR1     | 0          | 0        |
| ZRSR2     | 12.0561918 | 9.762565 |
| ZSCAN1    | 0.01023629 | 0        |
| ZSCAN10   | 0.1536565  | 0.087278 |
| ZSCAN12   | 2.18029175 | 2.049605 |
| ZSCAN12L1 | 0          | 0        |
| ZSCAN16   | 4.91030457 | 3.200904 |
| ZSCAN18   | 6.68956063 | 6.393689 |
| ZSCAN2    | 1.19299427 | 1.019156 |
| ZSCAN20   | 0.03987735 | 0.039639 |
| ZSCAN21   | 1.61733315 | 1.645178 |
| ZSCAN22   | 0.99171817 | 0.910546 |
| ZSCAN23   | 0.00665148 | 0.015112 |
| ZSCAN29   | 35.8334337 | 30.72647 |
| ZSCAN4    | 0.00936123 | 0        |
| ZSCAN5A   | 0.94077964 | 0.89476  |
| ZSCAN5B   | 0.02586142 | 0.014689 |
| ZSCAN5C   | 0.02820299 | 0        |
| ZSWIM1    | 6.47529787 | 6.59621  |
| ZSWIM2    | 0          | 0        |
| ZSWIM3    | 3.42343285 | 3.07168  |
| ZSWIM4    | 0.39734435 | 0.633046 |
| ZSWIM5    | 0.01800731 | 0.028639 |
| ZSWIM6    | 22.5650744 | 27.0015  |
| ZSWIM7    | 8.07297319 | 5.447898 |
| ZUFSP     | 10.9293406 | 9.804321 |
| ZW10      | 4.47626672 | 4.455683 |
| ZWILCH    | 3.36880892 | 2.543843 |
| ZWINT     | 0.02271781 | 0.103231 |
| ZXDA      | 0.52728103 | 0.332778 |
| ZXDB      | 0.78630713 | 0.73662  |
| ZXDC      | 16.1894589 | 16.41308 |
| ZYG11A    | 0.00865953 | 0        |
| ZYG11B    | 5.74239667 | 6.250665 |
| ZYX       | 213.307727 | 274.9791 |
| ZZEF1     | 26.7655508 | 26.14052 |
| ZZZ3      | 2.58743374 | 2.541557 |
